# Supplementary material for: Population Structure and Genetic Diversity of the Toona ciliata (Meliaceae) Complex Assayed with Chloroplast DNA Markers
Source: MDPI journal article supplement (doi:10.3390/genes15030320), 2024-02-28
Supplement: s1 [file s1]

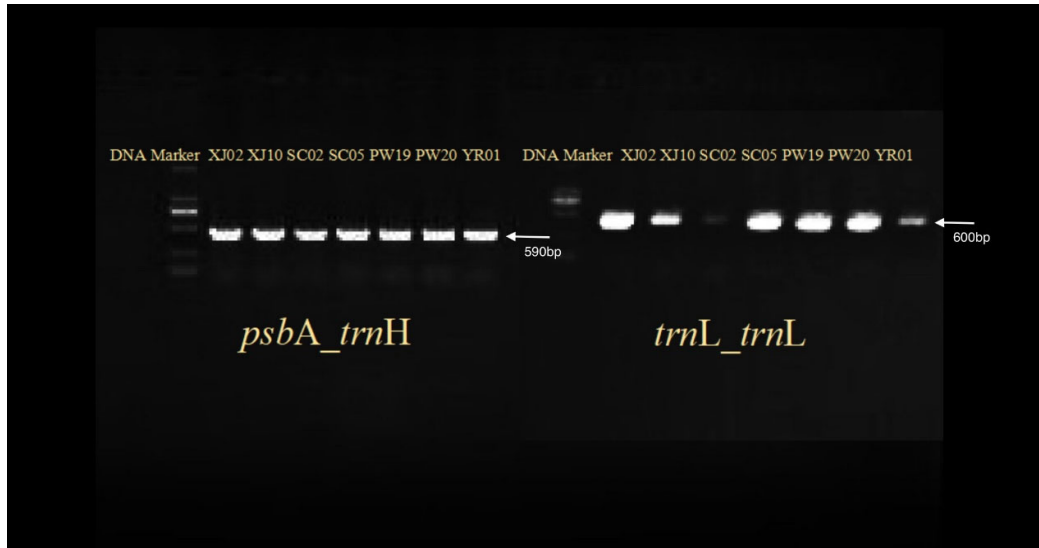

**Figure S1.** Electrophoresis of PCR amplification products of two primer pairs (*psbA-trnH* and *trnL-trnL*). Seven samples from four populations (XJ, SC, PW, and YR) were marked on the top line. Band sizes were indicated for amplifications of each primer pair.

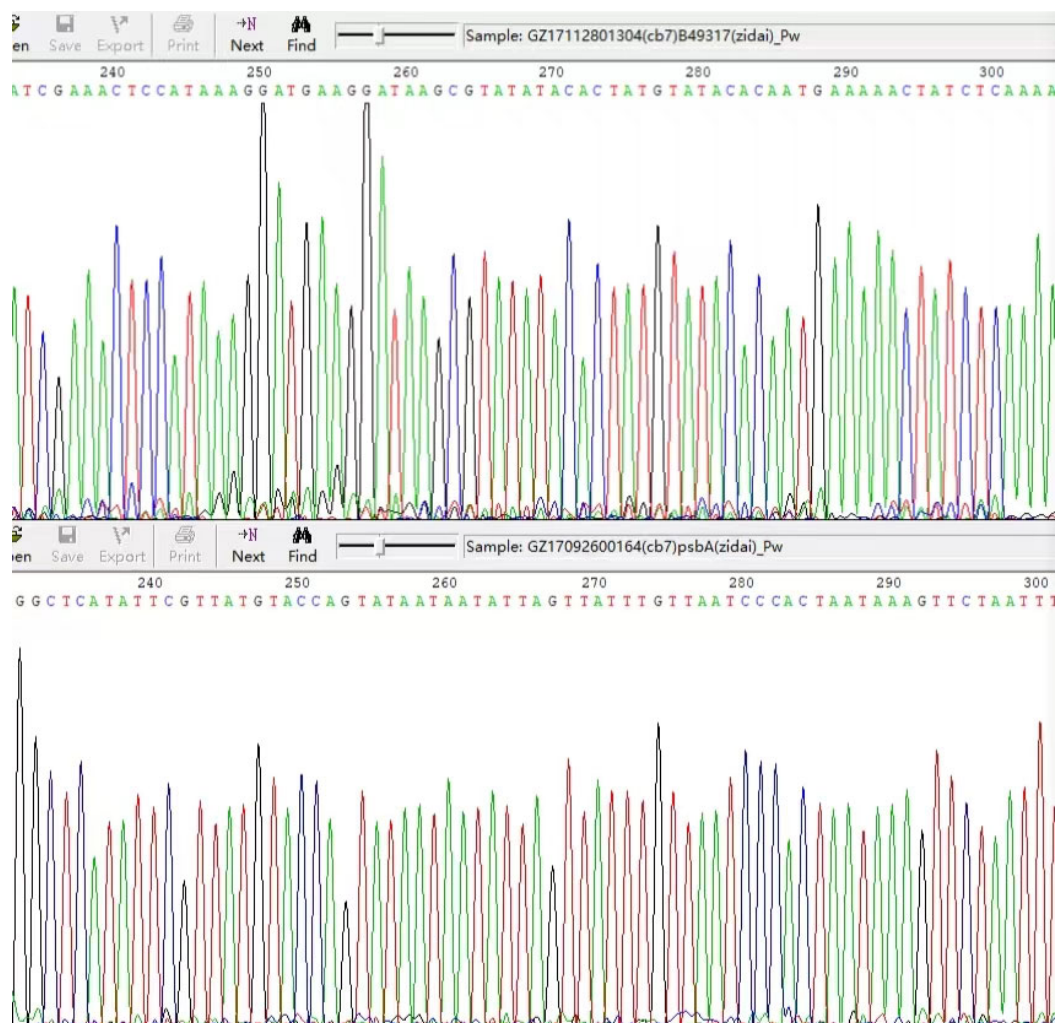

**Figure S2.** Sequencing peak maps were checked using Chromatogram Explorer 3.2. for *psbA-trnH* and *trnL-trnL* fragment amplifications. Bases A, T, G and C were indicated in different colors. The top figure was for PCR amplification of *psbA-trnH* and the bottom was for *trnL-trnL* of individual CB07 from Chengbu, Huanan Province.
