# Supplementary material for: Population Structure and Genetic Diversity of the Toona ciliata (Meliaceae) Complex Assayed with Chloroplast DNA Markers
Source: Genes (Basel). 2024 Feb 28;15(3):320. doi: 10.3390/genes15030320 (PMC10970150; doi:10.3390/genes15030320)
Supplement: Supplementary file 1 [file genes-15-00320-s001.zip]

Archive with 4 entries (4 files):
- genes-2866691-supplementary/Figure S1 and S2.pdf
- genes-2866691-supplementary/Table S1.txt
- genes-2866691-supplementary/Table S2.txt
- genes-2866691-supplementary/Table S3.txt
