# Supplementary material for: Population Structure and Genetic Diversity of the Toona ciliata (Meliaceae) Complex Assayed with Chloroplast DNA Markers
Source: Genes (Basel). 2024 Feb 28;15(3):320. doi: 10.3390/genes15030320 (PMC10970150; doi:10.3390/genes15030320)
Supplement: Supplementary file 1 [file genes-15-00320-s001.zip › genes-2866691-supplementary/Table S1.txt]

H1
>XJ01
CTGCTATTGA--GCCCCATCTACAAAT-GGATAA-TTCTGTC-TTAGTGGA-GACG-AGTTTTTGAAAATAACGG-AGAAATACCGACTCTCTTGCAAGAGAGTCGGTATTTCTCAGTTATTTTTTATGTTTT-TCTTTAGTAG---------------TTTTTTATTTCTATCCTTTTTT-TACGAAAAGTAT-TTTTATGCTTTTGCT--TTGATTTTGTCTGATATTTTTGTT----ATGGTTATGGGCTCATATTCGTTATGTACCAGTA--TAATAATATTAGTTATTTGTTAATCCCACTAATAA------AGTTCTAATTTTATTAATTCGATTCTAATTTTCGAATTTT-------TTAGTTTTTTTAATAG--AAAATA-AAAGAAAAGAGAAAGTTGTAA---TTTTATGCCTCTTAGAT-CTTCATTTCTATTT---------------TAAATGGTAG-AAATTGAAACCTTTTTATTAAATATTTTATTAAATAGAAATA-AAAAAAATTTTAAATCGTGG-AGGAAGGGGGGGCGGATGTAGCCAAGTGG
>XJ02
CTGCTATTGA--GCCCCATCTACAAAT-GGATAA-TTCTGTC-TTAGTGGA-GACG-AGTTTTTGAAAATAACGG-AGAAATACCGACTCTCTTGCAAGAGAGTCGGTATTTCTCAGTTATTTTTTATGTTTT-TCTTTAGTAG---------------TTTTTTATTTCTATCCTTTTTT-TACGAAAAGTAT-TTTTATGCTTTTGCT--TTGATTTTGTCTGATATTTTTGTT----ATGGTTATGGGCTCATATTCGTTATGTACCAGTA--TAATAATATTAGTTATTTGTTAATCCCACTAATAA------AGTTCTAATTTTATTAATTCGATTCTAATTTTCGAATTTT-------TTAGTTTTTTTAATAG--AAAATA-AAAGAAAAGAGAAAGTTGTAA---TTTTATGCCTCTTAGAT-CTTCATTTCTATTT---------------TAAATGGTAG-AAATTGAAACCTTTTTATTAAATATTTTATTAAATAGAAATA-AAAAAAATTTTAAATCGTGG-AGGAAGGGGGGGCGGATGTAGCCAAGTGG
>XJ09
CTGCTATTGA--GCCCCATCTACAAAT-GGATAA-TTCTGTC-TTAGTGGA-GACG-AGTTTTTGAAAATAACGG-AGAAATACCGACTCTCTTGCAAGAGAGTCGGTATTTCTCAGTTATTTTTTATGTTTT-TCTTTAGTAG---------------TTTTTTATTTCTATCCTTTTTT-TACGAAAAGTAT-TTTTATGCTTTTGCT--TTGATTTTGTCTGATATTTTTGTT----ATGGTTATGGGCTCATATTCGTTATGTACCAGTA--TAATAATATTAGTTATTTGTTAATCCCACTAATAA------AGTTCTAATTTTATTAATTCGATTCTAATTTTCGAATTTT-------TTAGTTTTTTTAATAG--AAAATA-AAAGAAAAGAGAAAGTTGTAA---TTTTATGCCTCTTAGAT-CTTCATTTCTATTT---------------TAAATGGTAG-AAATTGAAACCTTTTTATTAAATATTTTATTAAATAGAAATA-AAAAAAATTTTAAATCGTGG-AGGAAGGGGGGGCGGATGTAGCCAAGTGG
>SC01
CTGCTATTGA--GCCCCATCTACAAAT-GGATAA-TTCTGTC-TTAGTGGA-GACG-AGTTTTTGAAAATAACGG-AGAAATACCGACTCTCTTGCAAGAGAGTCGGTATTTCTCAGTTATTTTTTATGTTTT-TCTTTAGTAG---------------TTTTTTATTTCTATCCTTTTTT-TACGAAAAGTAT-TTTTATGCTTTTGCT--TTGATTTTGTCTGATATTTTTGTT----ATGGTTATGGGCTCATATTCGTTATGTACCAGTA--TAATAATATTAGTTATTTGTTAATCCCACTAATAA------AGTTCTAATTTTATTAATTCGATTCTAATTTTCGAATTTT-------TTAGTTTTTTTAATAG--AAAATA-AAAGAAAAGAGAAAGTTGTAA---TTTTATGCCTCTTAGAT-CTTCATTTCTATTT---------------TAAATGGTAG-AAATTGAAACCTTTTTATTAAATATTTTATTAAATAGAAATA-AAAAAAATTTTAAATCGTGG-AGGAAGGGGGGGCGGATGTAGCCAAGTGG
>NP02
CTGCTATTGA--GCCCCATCTACAAAT-GGATAA-TTCTGTC-TTAGTGGA-GACG-AGTTTTTGAAAATAACGG-AGAAATACCGACTCTCTTGCAAGAGAGTCGGTATTTCTCAGTTATTTTTTATGTTTT-TCTTTAGTAG---------------TTTTTTATTTCTATCCTTTTTT-TACGAAAAGTAT-TTTTATGCTTTTGCT--TTGATTTTGTCTGATATTTTTGTT----ATGGTTATGGGCTCATATTCGTTATGTACCAGTA--TAATAATATTAGTTATTTGTTAATCCCACTAATAA------AGTTCTAATTTTATTAATTCGATTCTAATTTTCGAATTTT-------TTAGTTTTTTTAATAG--AAAATA-AAAGAAAAGAGAAAGTTGTAA---TTTTATGCCTCTTAGAT-CTTCATTTCTATTT---------------TAAATGGTAG-AAATTGAAACCTTTTTATTAAATATTTTATTAAATAGAAATA-AAAAAAATTTTAAATCGTGG-AGGAAGGGGGGGCGGATGTAGCCAAGTGG
>NP03
CTGCTATTGA--GCCCCATCTACAAAT-GGATAA-TTCTGTC-TTAGTGGA-GACG-AGTTTTTGAAAATAACGG-AGAAATACCGACTCTCTTGCAAGAGAGTCGGTATTTCTCAGTTATTTTTTATGTTTT-TCTTTAGTAG---------------TTTTTTATTTCTATCCTTTTTT-TACGAAAAGTAT-TTTTATGCTTTTGCT--TTGATTTTGTCTGATATTTTTGTT----ATGGTTATGGGCTCATATTCGTTATGTACCAGTA--TAATAATATTAGTTATTTGTTAATCCCACTAATAA------AGTTCTAATTTTATTAATTCGATTCTAATTTTCGAATTTT-------TTAGTTTTTTTAATAG--AAAATA-AAAGAAAAGAGAAAGTTGTAA---TTTTATGCCTCTTAGAT-CTTCATTTCTATTT---------------TAAATGGTAG-AAATTGAAACCTTTTTATTAAATATTTTATTAAATAGAAATA-AAAAAAATTTTAAATCGTGG-AGGAAGGGGGGGCGGATGTAGCCAAGTGG
>NP09
CTGCTATTGA--GCCCCATCTACAAAT-GGATAA-TTCTGTC-TTAGTGGA-GACG-AGTTTTTGAAAATAACGG-AGAAATACCGACTCTCTTGCAAGAGAGTCGGTATTTCTCAGTTATTTTTTATGTTTT-TCTTTAGTAG---------------TTTTTTATTTCTATCCTTTTTT-TACGAAAAGTAT-TTTTATGCTTTTGCT--TTGATTTTGTCTGATATTTTTGTT----ATGGTTATGGGCTCATATTCGTTATGTACCAGTA--TAATAATATTAGTTATTTGTTAATCCCACTAATAA------AGTTCTAATTTTATTAATTCGATTCTAATTTTCGAATTTT-------TTAGTTTTTTTAATAG--AAAATA-AAAGAAAAGAGAAAGTTGTAA---TTTTATGCCTCTTAGAT-CTTCATTTCTATTT---------------TAAATGGTAG-AAATTGAAACCTTTTTATTAAATATTTTATTAAATAGAAATA-AAAAAAATTTTAAATCGTGG-AGGAAGGGGGGGCGGATGTAGCCAAGTGG
>JL01
CTGCTATTGA--GCCCCATCTACAAAT-GGATAA-TTCTGTC-TTAGTGGA-GACG-AGTTTTTGAAAATAACGG-AGAAATACCGACTCTCTTGCAAGAGAGTCGGTATTTCTCAGTTATTTTTTATGTTTT-TCTTTAGTAG---------------TTTTTTATTTCTATCCTTTTTT-TACGAAAAGTAT-TTTTATGCTTTTGCT--TTGATTTTGTCTGATATTTTTGTT----ATGGTTATGGGCTCATATTCGTTATGTACCAGTA--TAATAATATTAGTTATTTGTTAATCCCACTAATAA------AGTTCTAATTTTATTAATTCGATTCTAATTTTCGAATTTT-------TTAGTTTTTTTAATAG--AAAATA-AAAGAAAAGAGAAAGTTGTAA---TTTTATGCCTCTTAGAT-CTTCATTTCTATTT---------------TAAATGGTAG-AAATTGAAACCTTTTTATTAAATATTTTATTAAATAGAAATA-AAAAAAATTTTAAATCGTGG-AGGAAGGGGGGGCGGATGTAGCCAAGTGG
>JL09
CTGCTATTGA--GCCCCATCTACAAAT-GGATAA-TTCTGTC-TTAGTGGA-GACG-AGTTTTTGAAAATAACGG-AGAAATACCGACTCTCTTGCAAGAGAGTCGGTATTTCTCAGTTATTTTTTATGTTTT-TCTTTAGTAG---------------TTTTTTATTTCTATCCTTTTTT-TACGAAAAGTAT-TTTTATGCTTTTGCT--TTGATTTTGTCTGATATTTTTGTT----ATGGTTATGGGCTCATATTCGTTATGTACCAGTA--TAATAATATTAGTTATTTGTTAATCCCACTAATAA------AGTTCTAATTTTATTAATTCGATTCTAATTTTCGAATTTT-------TTAGTTTTTTTAATAG--AAAATA-AAAGAAAAGAGAAAGTTGTAA---TTTTATGCCTCTTAGAT-CTTCATTTCTATTT---------------TAAATGGTAG-AAATTGAAACCTTTTTATTAAATATTTTATTAAATAGAAATA-AAAAAAATTTTAAATCGTGG-AGGAAGGGGGGGCGGATGTAGCCAAGTGG
>XE02
CTGCTATTGA--GCCCCATCTACAAAT-GGATAA-TTCTGTC-TTAGTGGA-GACG-AGTTTTTGAAAATAACGG-AGAAATACCGACTCTCTTGCAAGAGAGTCGGTATTTCTCAGTTATTTTTTATGTTTT-TCTTTAGTAG---------------TTTTTTATTTCTATCCTTTTTT-TACGAAAAGTAT-TTTTATGCTTTTGCT--TTGATTTTGTCTGATATTTTTGTT----ATGGTTATGGGCTCATATTCGTTATGTACCAGTA--TAATAATATTAGTTATTTGTTAATCCCACTAATAA------AGTTCTAATTTTATTAATTCGATTCTAATTTTCGAATTTT-------TTAGTTTTTTTAATAG--AAAATA-AAAGAAAAGAGAAAGTTGTAA---TTTTATGCCTCTTAGAT-CTTCATTTCTATTT---------------TAAATGGTAG-AAATTGAAACCTTTTTATTAAATATTTTATTAAATAGAAATA-AAAAAAATTTTAAATCGTGG-AGGAAGGGGGGGCGGATGTAGCCAAGTGG

H2
>XJ03
CTGCTATTGA--GCCCCATCTACAAAT-GGATAA-TTCTGTC-TTAGTGGA-GACGA-GTTTTTGAAAATAACGG-AGAAATACCGACTCTCTTGCAAGAGAGTCGGTATTTCTCCGTTATTTTTTATGTTTT-TCTTTAGTAG---------------TTTTTTATTTCTATCCTTTTTT-TACGAAAAGTAT-TTTTATGCTTTTGCT--TTGATTTTGTCTGATATTTTTGTT----ATGGTTATGGGCTCATATTCGTTATGTACCAGTA--TAATAATATTAGTTATTTGTTAATCCCACTAATAA------AGTTCTAATTTTATTAATTCGATTCTAATTTTCGAATTTT-------TTAGTTTTTTTAATAG--AAAATA-AAAGAAAAGAGAAAGTTGTAA---TTTTATGCCTCTTAGAT-CTTCATTTCTATTT---------------TAAATGGTAG-AAATTGAAACCTTTTTATTAAATATTTTATTAAATAGAAATA-AAAAAAATTTTAAATCGTGG-AGGAAGGGGGGGCGGATGTAGCCAAGTGG
>XJ04
CTGCTATTGA--GCCCCATCTACAAAT-GGATAA-TTCTGTC-TTAGTGGA-GACGA-GTTTTTGAAAATAACGG-AGAAATACCGACTCTCTTGCAAGAGAGTCGGTATTTCTCCGTTATTTTTTATGTTTT-TCTTTAGTAG---------------TTTTTTATTTCTATCCTTTTTT-TACGAAAAGTAT-TTTTATGCTTTTGCT--TTGATTTTGTCTGATATTTTTGTT----ATGGTTATGGGCTCATATTCGTTATGTACCAGTA--TAATAATATTAGTTATTTGTTAATCCCACTAATAA------AGTTCTAATTTTATTAATTCGATTCTAATTTTCGAATTTT-------TTAGTTTTTTTAATAG--AAAATA-AAAGAAAAGAGAAAGTTGTAA---TTTTATGCCTCTTAGAT-CTTCATTTCTATTT---------------TAAATGGTAG-AAATTGAAACCTTTTTATTAAATATTTTATTAAATAGAAATA-AAAAAAATTTTAAATCGTGG-AGGAAGGGGGGGCGGATGTAGCCAAGTGG
>XJ06
CTGCTATTGA--GCCCCATCTACAAAT-GGATAA-TTCTGTC-TTAGTGGA-GACGA-GTTTTTGAAAATAACGG-AGAAATACCGACTCTCTTGCAAGAGAGTCGGTATTTCTCCGTTATTTTTTATGTTTT-TCTTTAGTAG---------------TTTTTTATTTCTATCCTTTTTT-TACGAAAAGTAT-TTTTATGCTTTTGCT--TTGATTTTGTCTGATATTTTTGTT----ATGGTTATGGGCTCATATTCGTTATGTACCAGTA--TAATAATATTAGTTATTTGTTAATCCCACTAATAA------AGTTCTAATTTTATTAATTCGATTCTAATTTTCGAATTTT-------TTAGTTTTTTTAATAG--AAAATA-AAAGAAAAGAGAAAGTTGTAA---TTTTATGCCTCTTAGAT-CTTCATTTCTATTT---------------TAAATGGTAG-AAATTGAAACCTTTTTATTAAATATTTTATTAAATAGAAATA-AAAAAAATTTTAAATCGTGG-AGGAAGGGGGGGCGGATGTAGCCAAGTGG
>XJ07
CTGCTATTGA--GCCCCATCTACAAAT-GGATAA-TTCTGTC-TTAGTGGA-GACGA-GTTTTTGAAAATAACGG-AGAAATACCGACTCTCTTGCAAGAGAGTCGGTATTTCTCCGTTATTTTTTATGTTTT-TCTTTAGTAG---------------TTTTTTATTTCTATCCTTTTTT-TACGAAAAGTAT-TTTTATGCTTTTGCT--TTGATTTTGTCTGATATTTTTGTT----ATGGTTATGGGCTCATATTCGTTATGTACCAGTA--TAATAATATTAGTTATTTGTTAATCCCACTAATAA------AGTTCTAATTTTATTAATTCGATTCTAATTTTCGAATTTT-------TTAGTTTTTTTAATAG--AAAATA-AAAGAAAAGAGAAAGTTGTAA---TTTTATGCCTCTTAGAT-CTTCATTTCTATTT---------------TAAATGGTAG-AAATTGAAACCTTTTTATTAAATATTTTATTAAATAGAAATA-AAAAAAATTTTAAATCGTGG-AGGAAGGGGGGGCGGATGTAGCCAAGTGG
>XJ08
CTGCTATTGA--GCCCCATCTACAAAT-GGATAA-TTCTGTC-TTAGTGGA-GACGA-GTTTTTGAAAATAACGG-AGAAATACCGACTCTCTTGCAAGAGAGTCGGTATTTCTCCGTTATTTTTTATGTTTT-TCTTTAGTAG---------------TTTTTTATTTCTATCCTTTTTT-TACGAAAAGTAT-TTTTATGCTTTTGCT--TTGATTTTGTCTGATATTTTTGTT----ATGGTTATGGGCTCATATTCGTTATGTACCAGTA--TAATAATATTAGTTATTTGTTAATCCCACTAATAA------AGTTCTAATTTTATTAATTCGATTCTAATTTTCGAATTTT-------TTAGTTTTTTTAATAG--AAAATA-AAAGAAAAGAGAAAGTTGTAA---TTTTATGCCTCTTAGAT-CTTCATTTCTATTT---------------TAAATGGTAG-AAATTGAAACCTTTTTATTAAATATTTTATTAAATAGAAATA-AAAAAAATTTTAAATCGTGG-AGGAAGGGGGGGCGGATGTAGCCAAGTGG
>SC03
CTGCTATTGA--GCCCCATCTACAAAT-GGATAA-TTCTGTC-TTAGTGGA-GACGA-GTTTTTGAAAATAACGG-AGAAATACCGACTCTCTTGCAAGAGAGTCGGTATTTCTCCGTTATTTTTTATGTTTT-TCTTTAGTAG---------------TTTTTTATTTCTATCCTTTTTT-TACGAAAAGTAT-TTTTATGCTTTTGCT--TTGATTTTGTCTGATATTTTTGTT----ATGGTTATGGGCTCATATTCGTTATGTACCAGTA--TAATAATATTAGTTATTTGTTAATCCCACTAATAA------AGTTCTAATTTTATTAATTCGATTCTAATTTTCGAATTTT-------TTAGTTTTTTTAATAG--AAAATA-AAAGAAAAGAGAAAGTTGTAA---TTTTATGCCTCTTAGAT-CTTCATTTCTATTT---------------TAAATGGTAG-AAATTGAAACCTTTTTATTAAATATTTTATTAAATAGAAATA-AAAAAAATTTTAAATCGTGG-AGGAAGGGGGGGCGGATGTAGCCAAGTGG
>SC05
CTGCTATTGA--GCCCCATCTACAAAT-GGATAA-TTCTGTC-TTAGTGGA-GACGA-GTTTTTGAAAATAACGG-AGAAATACCGACTCTCTTGCAAGAGAGTCGGTATTTCTCCGTTATTTTTTATGTTTT-TCTTTAGTAG---------------TTTTTTATTTCTATCCTTTTTT-TACGAAAAGTAT-TTTTATGCTTTTGCT--TTGATTTTGTCTGATATTTTTGTT----ATGGTTATGGGCTCATATTCGTTATGTACCAGTA--TAATAATATTAGTTATTTGTTAATCCCACTAATAA------AGTTCTAATTTTATTAATTCGATTCTAATTTTCGAATTTT-------TTAGTTTTTTTAATAG--AAAATA-AAAGAAAAGAGAAAGTTGTAA---TTTTATGCCTCTTAGAT-CTTCATTTCTATTT---------------TAAATGGTAG-AAATTGAAACCTTTTTATTAAATATTTTATTAAATAGAAATA-AAAAAAATTTTAAATCGTGG-AGGAAGGGGGGGCGGATGTAGCCAAGTGG
>SC06
CTGCTATTGA--GCCCCATCTACAAAT-GGATAA-TTCTGTC-TTAGTGGA-GACGA-GTTTTTGAAAATAACGG-AGAAATACCGACTCTCTTGCAAGAGAGTCGGTATTTCTCCGTTATTTTTTATGTTTT-TCTTTAGTAG---------------TTTTTTATTTCTATCCTTTTTT-TACGAAAAGTAT-TTTTATGCTTTTGCT--TTGATTTTGTCTGATATTTTTGTT----ATGGTTATGGGCTCATATTCGTTATGTACCAGTA--TAATAATATTAGTTATTTGTTAATCCCACTAATAA------AGTTCTAATTTTATTAATTCGATTCTAATTTTCGAATTTT-------TTAGTTTTTTTAATAG--AAAATA-AAAGAAAAGAGAAAGTTGTAA---TTTTATGCCTCTTAGAT-CTTCATTTCTATTT---------------TAAATGGTAG-AAATTGAAACCTTTTTATTAAATATTTTATTAAATAGAAATA-AAAAAAATTTTAAATCGTGG-AGGAAGGGGGGGCGGATGTAGCCAAGTGG
>SC07
CTGCTATTGA--GCCCCATCTACAAAT-GGATAA-TTCTGTC-TTAGTGGA-GACGA-GTTTTTGAAAATAACGG-AGAAATACCGACTCTCTTGCAAGAGAGTCGGTATTTCTCCGTTATTTTTTATGTTTT-TCTTTAGTAG---------------TTTTTTATTTCTATCCTTTTTT-TACGAAAAGTAT-TTTTATGCTTTTGCT--TTGATTTTGTCTGATATTTTTGTT----ATGGTTATGGGCTCATATTCGTTATGTACCAGTA--TAATAATATTAGTTATTTGTTAATCCCACTAATAA------AGTTCTAATTTTATTAATTCGATTCTAATTTTCGAATTTT-------TTAGTTTTTTTAATAG--AAAATA-AAAGAAAAGAGAAAGTTGTAA---TTTTATGCCTCTTAGAT-CTTCATTTCTATTT---------------TAAATGGTAG-AAATTGAAACCTTTTTATTAAATATTTTATTAAATAGAAATA-AAAAAAATTTTAAATCGTGG-AGGAAGGGGGGGCGGATGTAGCCAAGTGG
>SC08
CTGCTATTGA--GCCCCATCTACAAAT-GGATAA-TTCTGTC-TTAGTGGA-GACGA-GTTTTTGAAAATAACGG-AGAAATACCGACTCTCTTGCAAGAGAGTCGGTATTTCTCCGTTATTTTTTATGTTTT-TCTTTAGTAG---------------TTTTTTATTTCTATCCTTTTTT-TACGAAAAGTAT-TTTTATGCTTTTGCT--TTGATTTTGTCTGATATTTTTGTT----ATGGTTATGGGCTCATATTCGTTATGTACCAGTA--TAATAATATTAGTTATTTGTTAATCCCACTAATAA------AGTTCTAATTTTATTAATTCGATTCTAATTTTCGAATTTT-------TTAGTTTTTTTAATAG--AAAATA-AAAGAAAAGAGAAAGTTGTAA---TTTTATGCCTCTTAGAT-CTTCATTTCTATTT---------------TAAATGGTAG-AAATTGAAACCTTTTTATTAAATATTTTATTAAATAGAAATA-AAAAAAATTTTAAATCGTGG-AGGAAGGGGGGGCGGATGTAGCCAAGTGG
>SC09
CTGCTATTGA--GCCCCATCTACAAAT-GGATAA-TTCTGTC-TTAGTGGA-GACGA-GTTTTTGAAAATAACGG-AGAAATACCGACTCTCTTGCAAGAGAGTCGGTATTTCTCCGTTATTTTTTATGTTTT-TCTTTAGTAG---------------TTTTTTATTTCTATCCTTTTTT-TACGAAAAGTAT-TTTTATGCTTTTGCT--TTGATTTTGTCTGATATTTTTGTT----ATGGTTATGGGCTCATATTCGTTATGTACCAGTA--TAATAATATTAGTTATTTGTTAATCCCACTAATAA------AGTTCTAATTTTATTAATTCGATTCTAATTTTCGAATTTT-------TTAGTTTTTTTAATAG--AAAATA-AAAGAAAAGAGAAAGTTGTAA---TTTTATGCCTCTTAGAT-CTTCATTTCTATTT---------------TAAATGGTAG-AAATTGAAACCTTTTTATTAAATATTTTATTAAATAGAAATA-AAAAAAATTTTAAATCGTGG-AGGAAGGGGGGGCGGATGTAGCCAAGTGG
>SC11
CTGCTATTGA--GCCCCATCTACAAAT-GGATAA-TTCTGTC-TTAGTGGA-GACGA-GTTTTTGAAAATAACGG-AGAAATACCGACTCTCTTGCAAGAGAGTCGGTATTTCTCCGTTATTTTTTATGTTTT-TCTTTAGTAG---------------TTTTTTATTTCTATCCTTTTTT-TACGAAAAGTAT-TTTTATGCTTTTGCT--TTGATTTTGTCTGATATTTTTGTT----ATGGTTATGGGCTCATATTCGTTATGTACCAGTA--TAATAATATTAGTTATTTGTTAATCCCACTAATAA------AGTTCTAATTTTATTAATTCGATTCTAATTTTCGAATTTT-------TTAGTTTTTTTAATAG--AAAATA-AAAGAAAAGAGAAAGTTGTAA---TTTTATGCCTCTTAGAT-CTTCATTTCTATTT---------------TAAATGGTAG-AAATTGAAACCTTTTTATTAAATATTTTATTAAATAGAAATA-AAAAAAATTTTAAATCGTGG-AGGAAGGGGGGGCGGATGTAGCCAAGTGG
>SC12
CTGCTATTGA--GCCCCATCTACAAAT-GGATAA-TTCTGTC-TTAGTGGA-GACGA-GTTTTTGAAAATAACGG-AGAAATACCGACTCTCTTGCAAGAGAGTCGGTATTTCTCCGTTATTTTTTATGTTTT-TCTTTAGTAG---------------TTTTTTATTTCTATCCTTTTTT-TACGAAAAGTAT-TTTTATGCTTTTGCT--TTGATTTTGTCTGATATTTTTGTT----ATGGTTATGGGCTCATATTCGTTATGTACCAGTA--TAATAATATTAGTTATTTGTTAATCCCACTAATAA------AGTTCTAATTTTATTAATTCGATTCTAATTTTCGAATTTT-------TTAGTTTTTTTAATAG--AAAATA-AAAGAAAAGAGAAAGTTGTAA---TTTTATGCCTCTTAGAT-CTTCATTTCTATTT---------------TAAATGGTAG-AAATTGAAACCTTTTTATTAAATATTTTATTAAATAGAAATA-AAAAAAATTTTAAATCGTGG-AGGAAGGGGGGGCGGATGTAGCCAAGTGG
>XN06
CTGCTATTGA--GCCCCATCTACAAAT-GGATAA-TTCTGTC-TTAGTGGA-GACGA-GTTTTTGAAAATAACGG-AGAAATACCGACTCTCTTGCAAGAGAGTCGGTATTTCTCCGTTATTTTTTATGTTTT-TCTTTAGTAG---------------TTTTTTATTTCTATCCTTTTTT-TACGAAAAGTAT-TTTTATGCTTTTGCT--TTGATTTTGTCTGATATTTTTGTT----ATGGTTATGGGCTCATATTCGTTATGTACCAGTA--TAATAATATTAGTTATTTGTTAATCCCACTAATAA------AGTTCTAATTTTATTAATTCGATTCTAATTTTCGAATTTT-------TTAGTTTTTTTAATAG--AAAATA-AAAGAAAAGAGAAAGTTGTAA---TTTTATGCCTCTTAGAT-CTTCATTTCTATTT---------------TAAATGGTAG-AAATTGAAACCTTTTTATTAAATATTTTATTAAATAGAAATA-AAAAAAATTTTAAATCGTGG-AGGAAGGGGGGGCGGATGTAGCCAAGTGG
>JL07
CTGCTATTGA--GCCCCATCTACAAAT-GGATAA-TTCTGTC-TTAGTGGA-GACGA-GTTTTTGAAAATAACGG-AGAAATACCGACTCTCTTGCAAGAGAGTCGGTATTTCTCCGTTATTTTTTATGTTTT-TCTTTAGTAG---------------TTTTTTATTTCTATCCTTTTTT-TACGAAAAGTAT-TTTTATGCTTTTGCT--TTGATTTTGTCTGATATTTTTGTT----ATGGTTATGGGCTCATATTCGTTATGTACCAGTA--TAATAATATTAGTTATTTGTTAATCCCACTAATAA------AGTTCTAATTTTATTAATTCGATTCTAATTTTCGAATTTT-------TTAGTTTTTTTAATAG--AAAATA-AAAGAAAAGAGAAAGTTGTAA---TTTTATGCCTCTTAGAT-CTTCATTTCTATTT---------------TAAATGGTAG-AAATTGAAACCTTTTTATTAAATATTTTATTAAATAGAAATA-AAAAAAATTTTAAATCGTGG-AGGAAGGGGGGGCGGATGTAGCCAAGTGG
>JX03
CTGCTATTGA--GCCCCATCTACAAAT-GGATAA-TTCTGTC-TTAGTGGA-GACGA-GTTTTTGAAAATAACGG-AGAAATACCGACTCTCTTGCAAGAGAGTCGGTATTTCTCCGTTATTTTTTATGTTTT-TCTTTAGTAG---------------TTTTTTATTTCTATCCTTTTTT-TACGAAAAGTAT-TTTTATGCTTTTGCT--TTGATTTTGTCTGATATTTTTGTT----ATGGTTATGGGCTCATATTCGTTATGTACCAGTA--TAATAATATTAGTTATTTGTTAATCCCACTAATAA------AGTTCTAATTTTATTAATTCGATTCTAATTTTCGAATTTT-------TTAGTTTTTTTAATAG--AAAATA-AAAGAAAAGAGAAAGTTGTAA---TTTTATGCCTCTTAGAT-CTTCATTTCTATTT---------------TAAATGGTAG-AAATTGAAACCTTTTTATTAAATATTTTATTAAATAGAAATA-AAAAAAATTTTAAATCGTGG-AGGAAGGGGGGGCGGATGTAGCCAAGTGG
>JX04
CTGCTATTGA--GCCCCATCTACAAAT-GGATAA-TTCTGTC-TTAGTGGA-GACGA-GTTTTTGAAAATAACGG-AGAAATACCGACTCTCTTGCAAGAGAGTCGGTATTTCTCCGTTATTTTTTATGTTTT-TCTTTAGTAG---------------TTTTTTATTTCTATCCTTTTTT-TACGAAAAGTAT-TTTTATGCTTTTGCT--TTGATTTTGTCTGATATTTTTGTT----ATGGTTATGGGCTCATATTCGTTATGTACCAGTA--TAATAATATTAGTTATTTGTTAATCCCACTAATAA------AGTTCTAATTTTATTAATTCGATTCTAATTTTCGAATTTT-------TTAGTTTTTTTAATAG--AAAATA-AAAGAAAAGAGAAAGTTGTAA---TTTTATGCCTCTTAGAT-CTTCATTTCTATTT---------------TAAATGGTAG-AAATTGAAACCTTTTTATTAAATATTTTATTAAATAGAAATA-AAAAAAATTTTAAATCGTGG-AGGAAGGGGGGGCGGATGTAGCCAAGTGG
>JX05
CTGCTATTGA--GCCCCATCTACAAAT-GGATAA-TTCTGTC-TTAGTGGA-GACGA-GTTTTTGAAAATAACGG-AGAAATACCGACTCTCTTGCAAGAGAGTCGGTATTTCTCCGTTATTTTTTATGTTTT-TCTTTAGTAG---------------TTTTTTATTTCTATCCTTTTTT-TACGAAAAGTAT-TTTTATGCTTTTGCT--TTGATTTTGTCTGATATTTTTGTT----ATGGTTATGGGCTCATATTCGTTATGTACCAGTA--TAATAATATTAGTTATTTGTTAATCCCACTAATAA------AGTTCTAATTTTATTAATTCGATTCTAATTTTCGAATTTT-------TTAGTTTTTTTAATAG--AAAATA-AAAGAAAAGAGAAAGTTGTAA---TTTTATGCCTCTTAGAT-CTTCATTTCTATTT---------------TAAATGGTAG-AAATTGAAACCTTTTTATTAAATATTTTATTAAATAGAAATA-AAAAAAATTTTAAATCGTGG-AGGAAGGGGGGGCGGATGTAGCCAAGTGG
>JX06
CTGCTATTGA--GCCCCATCTACAAAT-GGATAA-TTCTGTC-TTAGTGGA-GACGA-GTTTTTGAAAATAACGG-AGAAATACCGACTCTCTTGCAAGAGAGTCGGTATTTCTCCGTTATTTTTTATGTTTT-TCTTTAGTAG---------------TTTTTTATTTCTATCCTTTTTT-TACGAAAAGTAT-TTTTATGCTTTTGCT--TTGATTTTGTCTGATATTTTTGTT----ATGGTTATGGGCTCATATTCGTTATGTACCAGTA--TAATAATATTAGTTATTTGTTAATCCCACTAATAA------AGTTCTAATTTTATTAATTCGATTCTAATTTTCGAATTTT-------TTAGTTTTTTTAATAG--AAAATA-AAAGAAAAGAGAAAGTTGTAA---TTTTATGCCTCTTAGAT-CTTCATTTCTATTT---------------TAAATGGTAG-AAATTGAAACCTTTTTATTAAATATTTTATTAAATAGAAATA-AAAAAAATTTTAAATCGTGG-AGGAAGGGGGGGCGGATGTAGCCAAGTGG
>JX07
CTGCTATTGA--GCCCCATCTACAAAT-GGATAA-TTCTGTC-TTAGTGGA-GACGA-GTTTTTGAAAATAACGG-AGAAATACCGACTCTCTTGCAAGAGAGTCGGTATTTCTCCGTTATTTTTTATGTTTT-TCTTTAGTAG---------------TTTTTTATTTCTATCCTTTTTT-TACGAAAAGTAT-TTTTATGCTTTTGCT--TTGATTTTGTCTGATATTTTTGTT----ATGGTTATGGGCTCATATTCGTTATGTACCAGTA--TAATAATATTAGTTATTTGTTAATCCCACTAATAA------AGTTCTAATTTTATTAATTCGATTCTAATTTTCGAATTTT-------TTAGTTTTTTTAATAG--AAAATA-AAAGAAAAGAGAAAGTTGTAA---TTTTATGCCTCTTAGAT-CTTCATTTCTATTT---------------TAAATGGTAG-AAATTGAAACCTTTTTATTAAATATTTTATTAAATAGAAATA-AAAAAAATTTTAAATCGTGG-AGGAAGGGGGGGCGGATGTAGCCAAGTGG
>JX08
CTGCTATTGA--GCCCCATCTACAAAT-GGATAA-TTCTGTC-TTAGTGGA-GACGA-GTTTTTGAAAATAACGG-AGAAATACCGACTCTCTTGCAAGAGAGTCGGTATTTCTCCGTTATTTTTTATGTTTT-TCTTTAGTAG---------------TTTTTTATTTCTATCCTTTTTT-TACGAAAAGTAT-TTTTATGCTTTTGCT--TTGATTTTGTCTGATATTTTTGTT----ATGGTTATGGGCTCATATTCGTTATGTACCAGTA--TAATAATATTAGTTATTTGTTAATCCCACTAATAA------AGTTCTAATTTTATTAATTCGATTCTAATTTTCGAATTTT-------TTAGTTTTTTTAATAG--AAAATA-AAAGAAAAGAGAAAGTTGTAA---TTTTATGCCTCTTAGAT-CTTCATTTCTATTT---------------TAAATGGTAG-AAATTGAAACCTTTTTATTAAATATTTTATTAAATAGAAATA-AAAAAAATTTTAAATCGTGG-AGGAAGGGGGGGCGGATGTAGCCAAGTGG
>JX09
CTGCTATTGA--GCCCCATCTACAAAT-GGATAA-TTCTGTC-TTAGTGGA-GACGA-GTTTTTGAAAATAACGG-AGAAATACCGACTCTCTTGCAAGAGAGTCGGTATTTCTCCGTTATTTTTTATGTTTT-TCTTTAGTAG---------------TTTTTTATTTCTATCCTTTTTT-TACGAAAAGTAT-TTTTATGCTTTTGCT--TTGATTTTGTCTGATATTTTTGTT----ATGGTTATGGGCTCATATTCGTTATGTACCAGTA--TAATAATATTAGTTATTTGTTAATCCCACTAATAA------AGTTCTAATTTTATTAATTCGATTCTAATTTTCGAATTTT-------TTAGTTTTTTTAATAG--AAAATA-AAAGAAAAGAGAAAGTTGTAA---TTTTATGCCTCTTAGAT-CTTCATTTCTATTT---------------TAAATGGTAG-AAATTGAAACCTTTTTATTAAATATTTTATTAAATAGAAATA-AAAAAAATTTTAAATCGTGG-AGGAAGGGGGGGCGGATGTAGCCAAGTGG
>JX10
CTGCTATTGA--GCCCCATCTACAAAT-GGATAA-TTCTGTC-TTAGTGGA-GACGA-GTTTTTGAAAATAACGG-AGAAATACCGACTCTCTTGCAAGAGAGTCGGTATTTCTCCGTTATTTTTTATGTTTT-TCTTTAGTAG---------------TTTTTTATTTCTATCCTTTTTT-TACGAAAAGTAT-TTTTATGCTTTTGCT--TTGATTTTGTCTGATATTTTTGTT----ATGGTTATGGGCTCATATTCGTTATGTACCAGTA--TAATAATATTAGTTATTTGTTAATCCCACTAATAA------AGTTCTAATTTTATTAATTCGATTCTAATTTTCGAATTTT-------TTAGTTTTTTTAATAG--AAAATA-AAAGAAAAGAGAAAGTTGTAA---TTTTATGCCTCTTAGAT-CTTCATTTCTATTT---------------TAAATGGTAG-AAATTGAAACCTTTTTATTAAATATTTTATTAAATAGAAATA-AAAAAAATTTTAAATCGTGG-AGGAAGGGGGGGCGGATGTAGCCAAGTGG
>JX11
CTGCTATTGA--GCCCCATCTACAAAT-GGATAA-TTCTGTC-TTAGTGGA-GACGA-GTTTTTGAAAATAACGG-AGAAATACCGACTCTCTTGCAAGAGAGTCGGTATTTCTCCGTTATTTTTTATGTTTT-TCTTTAGTAG---------------TTTTTTATTTCTATCCTTTTTT-TACGAAAAGTAT-TTTTATGCTTTTGCT--TTGATTTTGTCTGATATTTTTGTT----ATGGTTATGGGCTCATATTCGTTATGTACCAGTA--TAATAATATTAGTTATTTGTTAATCCCACTAATAA------AGTTCTAATTTTATTAATTCGATTCTAATTTTCGAATTTT-------TTAGTTTTTTTAATAG--AAAATA-AAAGAAAAGAGAAAGTTGTAA---TTTTATGCCTCTTAGAT-CTTCATTTCTATTT---------------TAAATGGTAG-AAATTGAAACCTTTTTATTAAATATTTTATTAAATAGAAATA-AAAAAAATTTTAAATCGTGG-AGGAAGGGGGGGCGGATGTAGCCAAGTGG
>JX12
CTGCTATTGA--GCCCCATCTACAAAT-GGATAA-TTCTGTC-TTAGTGGA-GACGA-GTTTTTGAAAATAACGG-AGAAATACCGACTCTCTTGCAAGAGAGTCGGTATTTCTCCGTTATTTTTTATGTTTT-TCTTTAGTAG---------------TTTTTTATTTCTATCCTTTTTT-TACGAAAAGTAT-TTTTATGCTTTTGCT--TTGATTTTGTCTGATATTTTTGTT----ATGGTTATGGGCTCATATTCGTTATGTACCAGTA--TAATAATATTAGTTATTTGTTAATCCCACTAATAA------AGTTCTAATTTTATTAATTCGATTCTAATTTTCGAATTTT-------TTAGTTTTTTTAATAG--AAAATA-AAAGAAAAGAGAAAGTTGTAA---TTTTATGCCTCTTAGAT-CTTCATTTCTATTT---------------TAAATGGTAG-AAATTGAAACCTTTTTATTAAATATTTTATTAAATAGAAATA-AAAAAAATTTTAAATCGTGG-AGGAAGGGGGGGCGGATGTAGCCAAGTGG
>JX13
CTGCTATTGA--GCCCCATCTACAAAT-GGATAA-TTCTGTC-TTAGTGGA-GACGA-GTTTTTGAAAATAACGG-AGAAATACCGACTCTCTTGCAAGAGAGTCGGTATTTCTCCGTTATTTTTTATGTTTT-TCTTTAGTAG---------------TTTTTTATTTCTATCCTTTTTT-TACGAAAAGTAT-TTTTATGCTTTTGCT--TTGATTTTGTCTGATATTTTTGTT----ATGGTTATGGGCTCATATTCGTTATGTACCAGTA--TAATAATATTAGTTATTTGTTAATCCCACTAATAA------AGTTCTAATTTTATTAATTCGATTCTAATTTTCGAATTTT-------TTAGTTTTTTTAATAG--AAAATA-AAAGAAAAGAGAAAGTTGTAA---TTTTATGCCTCTTAGAT-CTTCATTTCTATTT---------------TAAATGGTAG-AAATTGAAACCTTTTTATTAAATATTTTATTAAATAGAAATA-AAAAAAATTTTAAATCGTGG-AGGAAGGGGGGGCGGATGTAGCCAAGTGG
>JX14
CTGCTATTGA--GCCCCATCTACAAAT-GGATAA-TTCTGTC-TTAGTGGA-GACGA-GTTTTTGAAAATAACGG-AGAAATACCGACTCTCTTGCAAGAGAGTCGGTATTTCTCCGTTATTTTTTATGTTTT-TCTTTAGTAG---------------TTTTTTATTTCTATCCTTTTTT-TACGAAAAGTAT-TTTTATGCTTTTGCT--TTGATTTTGTCTGATATTTTTGTT----ATGGTTATGGGCTCATATTCGTTATGTACCAGTA--TAATAATATTAGTTATTTGTTAATCCCACTAATAA------AGTTCTAATTTTATTAATTCGATTCTAATTTTCGAATTTT-------TTAGTTTTTTTAATAG--AAAATA-AAAGAAAAGAGAAAGTTGTAA---TTTTATGCCTCTTAGAT-CTTCATTTCTATTT---------------TAAATGGTAG-AAATTGAAACCTTTTTATTAAATATTTTATTAAATAGAAATA-AAAAAAATTTTAAATCGTGG-AGGAAGGGGGGGCGGATGTAGCCAAGTGG
>MT09
CTGCTATTGA--GCCCCATCTACAAAT-GGATAA-TTCTGTC-TTAGTGGA-GACGA-GTTTTTGAAAATAACGG-AGAAATACCGACTCTCTTGCAAGAGAGTCGGTATTTCTCCGTTATTTTTTATGTTTT-TCTTTAGTAG---------------TTTTTTATTTCTATCCTTTTTT-TACGAAAAGTAT-TTTTATGCTTTTGCT--TTGATTTTGTCTGATATTTTTGTT----ATGGTTATGGGCTCATATTCGTTATGTACCAGTA--TAATAATATTAGTTATTTGTTAATCCCACTAATAA------AGTTCTAATTTTATTAATTCGATTCTAATTTTCGAATTTT-------TTAGTTTTTTTAATAG--AAAATA-AAAGAAAAGAGAAAGTTGTAA---TTTTATGCCTCTTAGAT-CTTCATTTCTATTT---------------TAAATGGTAG-AAATTGAAACCTTTTTATTAAATATTTTATTAAATAGAAATA-AAAAAAATTTTAAATCGTGG-AGGAAGGGGGGGCGGATGTAGCCAAGTGG
>HP01
CTGCTATTGA--GCCCCATCTACAAAT-GGATAA-TTCTGTC-TTAGTGGA-GACGA-GTTTTTGAAAATAACGG-AGAAATACCGACTCTCTTGCAAGAGAGTCGGTATTTCTCCGTTATTTTTTATGTTTT-TCTTTAGTAG---------------TTTTTTATTTCTATCCTTTTTT-TACGAAAAGTAT-TTTTATGCTTTTGCT--TTGATTTTGTCTGATATTTTTGTT----ATGGTTATGGGCTCATATTCGTTATGTACCAGTA--TAATAATATTAGTTATTTGTTAATCCCACTAATAA------AGTTCTAATTTTATTAATTCGATTCTAATTTTCGAATTTT-------TTAGTTTTTTTAATAG--AAAATA-AAAGAAAAGAGAAAGTTGTAA---TTTTATGCCTCTTAGAT-CTTCATTTCTATTT---------------TAAATGGTAG-AAATTGAAACCTTTTTATTAAATATTTTATTAAATAGAAATA-AAAAAAATTTTAAATCGTGG-AGGAAGGGGGGGCGGATGTAGCCAAGTGG
>HP03
CTGCTATTGA--GCCCCATCTACAAAT-GGATAA-TTCTGTC-TTAGTGGA-GACGA-GTTTTTGAAAATAACGG-AGAAATACCGACTCTCTTGCAAGAGAGTCGGTATTTCTCCGTTATTTTTTATGTTTT-TCTTTAGTAG---------------TTTTTTATTTCTATCCTTTTTT-TACGAAAAGTAT-TTTTATGCTTTTGCT--TTGATTTTGTCTGATATTTTTGTT----ATGGTTATGGGCTCATATTCGTTATGTACCAGTA--TAATAATATTAGTTATTTGTTAATCCCACTAATAA------AGTTCTAATTTTATTAATTCGATTCTAATTTTCGAATTTT-------TTAGTTTTTTTAATAG--AAAATA-AAAGAAAAGAGAAAGTTGTAA---TTTTATGCCTCTTAGAT-CTTCATTTCTATTT---------------TAAATGGTAG-AAATTGAAACCTTTTTATTAAATATTTTATTAAATAGAAATA-AAAAAAATTTTAAATCGTGG-AGGAAGGGGGGGCGGATGTAGCCAAGTGG
>LC01
CTGCTATTGA--GCCCCATCTACAAAT-GGATAA-TTCTGTC-TTAGTGGA-GACGA-GTTTTTGAAAATAACGG-AGAAATACCGACTCTCTTGCAAGAGAGTCGGTATTTCTCCGTTATTTTTTATGTTTT-TCTTTAGTAG---------------TTTTTTATTTCTATCCTTTTTT-TACGAAAAGTAT-TTTTATGCTTTTGCT--TTGATTTTGTCTGATATTTTTGTT----ATGGTTATGGGCTCATATTCGTTATGTACCAGTA--TAATAATATTAGTTATTTGTTAATCCCACTAATAA------AGTTCTAATTTTATTAATTCGATTCTAATTTTCGAATTTT-------TTAGTTTTTTTAATAG--AAAATA-AAAGAAAAGAGAAAGTTGTAA---TTTTATGCCTCTTAGAT-CTTCATTTCTATTT---------------TAAATGGTAG-AAATTGAAACCTTTTTATTAAATATTTTATTAAATAGAAATA-AAAAAAATTTTAAATCGTGG-AGGAAGGGGGGGCGGATGTAGCCAAGTGG
>LC03
CTGCTATTGA--GCCCCATCTACAAAT-GGATAA-TTCTGTC-TTAGTGGA-GACGA-GTTTTTGAAAATAACGG-AGAAATACCGACTCTCTTGCAAGAGAGTCGGTATTTCTCCGTTATTTTTTATGTTTT-TCTTTAGTAG---------------TTTTTTATTTCTATCCTTTTTT-TACGAAAAGTAT-TTTTATGCTTTTGCT--TTGATTTTGTCTGATATTTTTGTT----ATGGTTATGGGCTCATATTCGTTATGTACCAGTA--TAATAATATTAGTTATTTGTTAATCCCACTAATAA------AGTTCTAATTTTATTAATTCGATTCTAATTTTCGAATTTT-------TTAGTTTTTTTAATAG--AAAATA-AAAGAAAAGAGAAAGTTGTAA---TTTTATGCCTCTTAGAT-CTTCATTTCTATTT---------------TAAATGGTAG-AAATTGAAACCTTTTTATTAAATATTTTATTAAATAGAAATA-AAAAAAATTTTAAATCGTGG-AGGAAGGGGGGGCGGATGTAGCCAAGTGG
>LC04
CTGCTATTGA--GCCCCATCTACAAAT-GGATAA-TTCTGTC-TTAGTGGA-GACGA-GTTTTTGAAAATAACGG-AGAAATACCGACTCTCTTGCAAGAGAGTCGGTATTTCTCCGTTATTTTTTATGTTTT-TCTTTAGTAG---------------TTTTTTATTTCTATCCTTTTTT-TACGAAAAGTAT-TTTTATGCTTTTGCT--TTGATTTTGTCTGATATTTTTGTT----ATGGTTATGGGCTCATATTCGTTATGTACCAGTA--TAATAATATTAGTTATTTGTTAATCCCACTAATAA------AGTTCTAATTTTATTAATTCGATTCTAATTTTCGAATTTT-------TTAGTTTTTTTAATAG--AAAATA-AAAGAAAAGAGAAAGTTGTAA---TTTTATGCCTCTTAGAT-CTTCATTTCTATTT---------------TAAATGGTAG-AAATTGAAACCTTTTTATTAAATATTTTATTAAATAGAAATA-AAAAAAATTTTAAATCGTGG-AGGAAGGGGGGGCGGATGTAGCCAAGTGG
>LC05
CTGCTATTGA--GCCCCATCTACAAAT-GGATAA-TTCTGTC-TTAGTGGA-GACGA-GTTTTTGAAAATAACGG-AGAAATACCGACTCTCTTGCAAGAGAGTCGGTATTTCTCCGTTATTTTTTATGTTTT-TCTTTAGTAG---------------TTTTTTATTTCTATCCTTTTTT-TACGAAAAGTAT-TTTTATGCTTTTGCT--TTGATTTTGTCTGATATTTTTGTT----ATGGTTATGGGCTCATATTCGTTATGTACCAGTA--TAATAATATTAGTTATTTGTTAATCCCACTAATAA------AGTTCTAATTTTATTAATTCGATTCTAATTTTCGAATTTT-------TTAGTTTTTTTAATAG--AAAATA-AAAGAAAAGAGAAAGTTGTAA---TTTTATGCCTCTTAGAT-CTTCATTTCTATTT---------------TAAATGGTAG-AAATTGAAACCTTTTTATTAAATATTTTATTAAATAGAAATA-AAAAAAATTTTAAATCGTGG-AGGAAGGGGGGGCGGATGTAGCCAAGTGG
>LC06
CTGCTATTGA--GCCCCATCTACAAAT-GGATAA-TTCTGTC-TTAGTGGA-GACGA-GTTTTTGAAAATAACGG-AGAAATACCGACTCTCTTGCAAGAGAGTCGGTATTTCTCCGTTATTTTTTATGTTTT-TCTTTAGTAG---------------TTTTTTATTTCTATCCTTTTTT-TACGAAAAGTAT-TTTTATGCTTTTGCT--TTGATTTTGTCTGATATTTTTGTT----ATGGTTATGGGCTCATATTCGTTATGTACCAGTA--TAATAATATTAGTTATTTGTTAATCCCACTAATAA------AGTTCTAATTTTATTAATTCGATTCTAATTTTCGAATTTT-------TTAGTTTTTTTAATAG--AAAATA-AAAGAAAAGAGAAAGTTGTAA---TTTTATGCCTCTTAGAT-CTTCATTTCTATTT---------------TAAATGGTAG-AAATTGAAACCTTTTTATTAAATATTTTATTAAATAGAAATA-AAAAAAATTTTAAATCGTGG-AGGAAGGGGGGGCGGATGTAGCCAAGTGG
>LC07
CTGCTATTGA--GCCCCATCTACAAAT-GGATAA-TTCTGTC-TTAGTGGA-GACGA-GTTTTTGAAAATAACGG-AGAAATACCGACTCTCTTGCAAGAGAGTCGGTATTTCTCCGTTATTTTTTATGTTTT-TCTTTAGTAG---------------TTTTTTATTTCTATCCTTTTTT-TACGAAAAGTAT-TTTTATGCTTTTGCT--TTGATTTTGTCTGATATTTTTGTT----ATGGTTATGGGCTCATATTCGTTATGTACCAGTA--TAATAATATTAGTTATTTGTTAATCCCACTAATAA------AGTTCTAATTTTATTAATTCGATTCTAATTTTCGAATTTT-------TTAGTTTTTTTAATAG--AAAATA-AAAGAAAAGAGAAAGTTGTAA---TTTTATGCCTCTTAGAT-CTTCATTTCTATTT---------------TAAATGGTAG-AAATTGAAACCTTTTTATTAAATATTTTATTAAATAGAAATA-AAAAAAATTTTAAATCGTGG-AGGAAGGGGGGGCGGATGTAGCCAAGTGG
>LC08
CTGCTATTGA--GCCCCATCTACAAAT-GGATAA-TTCTGTC-TTAGTGGA-GACGA-GTTTTTGAAAATAACGG-AGAAATACCGACTCTCTTGCAAGAGAGTCGGTATTTCTCCGTTATTTTTTATGTTTT-TCTTTAGTAG---------------TTTTTTATTTCTATCCTTTTTT-TACGAAAAGTAT-TTTTATGCTTTTGCT--TTGATTTTGTCTGATATTTTTGTT----ATGGTTATGGGCTCATATTCGTTATGTACCAGTA--TAATAATATTAGTTATTTGTTAATCCCACTAATAA------AGTTCTAATTTTATTAATTCGATTCTAATTTTCGAATTTT-------TTAGTTTTTTTAATAG--AAAATA-AAAGAAAAGAGAAAGTTGTAA---TTTTATGCCTCTTAGAT-CTTCATTTCTATTT---------------TAAATGGTAG-AAATTGAAACCTTTTTATTAAATATTTTATTAAATAGAAATA-AAAAAAATTTTAAATCGTGG-AGGAAGGGGGGGCGGATGTAGCCAAGTGG
>LC09
CTGCTATTGA--GCCCCATCTACAAAT-GGATAA-TTCTGTC-TTAGTGGA-GACGA-GTTTTTGAAAATAACGG-AGAAATACCGACTCTCTTGCAAGAGAGTCGGTATTTCTCCGTTATTTTTTATGTTTT-TCTTTAGTAG---------------TTTTTTATTTCTATCCTTTTTT-TACGAAAAGTAT-TTTTATGCTTTTGCT--TTGATTTTGTCTGATATTTTTGTT----ATGGTTATGGGCTCATATTCGTTATGTACCAGTA--TAATAATATTAGTTATTTGTTAATCCCACTAATAA------AGTTCTAATTTTATTAATTCGATTCTAATTTTCGAATTTT-------TTAGTTTTTTTAATAG--AAAATA-AAAGAAAAGAGAAAGTTGTAA---TTTTATGCCTCTTAGAT-CTTCATTTCTATTT---------------TAAATGGTAG-AAATTGAAACCTTTTTATTAAATATTTTATTAAATAGAAATA-AAAAAAATTTTAAATCGTGG-AGGAAGGGGGGGCGGATGTAGCCAAGTGG
>LC10
CTGCTATTGA--GCCCCATCTACAAAT-GGATAA-TTCTGTC-TTAGTGGA-GACGA-GTTTTTGAAAATAACGG-AGAAATACCGACTCTCTTGCAAGAGAGTCGGTATTTCTCCGTTATTTTTTATGTTTT-TCTTTAGTAG---------------TTTTTTATTTCTATCCTTTTTT-TACGAAAAGTAT-TTTTATGCTTTTGCT--TTGATTTTGTCTGATATTTTTGTT----ATGGTTATGGGCTCATATTCGTTATGTACCAGTA--TAATAATATTAGTTATTTGTTAATCCCACTAATAA------AGTTCTAATTTTATTAATTCGATTCTAATTTTCGAATTTT-------TTAGTTTTTTTAATAG--AAAATA-AAAGAAAAGAGAAAGTTGTAA---TTTTATGCCTCTTAGAT-CTTCATTTCTATTT---------------TAAATGGTAG-AAATTGAAACCTTTTTATTAAATATTTTATTAAATAGAAATA-AAAAAAATTTTAAATCGTGG-AGGAAGGGGGGGCGGATGTAGCCAAGTGG
>LC12
CTGCTATTGA--GCCCCATCTACAAAT-GGATAA-TTCTGTC-TTAGTGGA-GACGA-GTTTTTGAAAATAACGG-AGAAATACCGACTCTCTTGCAAGAGAGTCGGTATTTCTCCGTTATTTTTTATGTTTT-TCTTTAGTAG---------------TTTTTTATTTCTATCCTTTTTT-TACGAAAAGTAT-TTTTATGCTTTTGCT--TTGATTTTGTCTGATATTTTTGTT----ATGGTTATGGGCTCATATTCGTTATGTACCAGTA--TAATAATATTAGTTATTTGTTAATCCCACTAATAA------AGTTCTAATTTTATTAATTCGATTCTAATTTTCGAATTTT-------TTAGTTTTTTTAATAG--AAAATA-AAAGAAAAGAGAAAGTTGTAA---TTTTATGCCTCTTAGAT-CTTCATTTCTATTT---------------TAAATGGTAG-AAATTGAAACCTTTTTATTAAATATTTTATTAAATAGAAATA-AAAAAAATTTTAAATCGTGG-AGGAAGGGGGGGCGGATGTAGCCAAGTGG
>LC13
CTGCTATTGA--GCCCCATCTACAAAT-GGATAA-TTCTGTC-TTAGTGGA-GACGA-GTTTTTGAAAATAACGG-AGAAATACCGACTCTCTTGCAAGAGAGTCGGTATTTCTCCGTTATTTTTTATGTTTT-TCTTTAGTAG---------------TTTTTTATTTCTATCCTTTTTT-TACGAAAAGTAT-TTTTATGCTTTTGCT--TTGATTTTGTCTGATATTTTTGTT----ATGGTTATGGGCTCATATTCGTTATGTACCAGTA--TAATAATATTAGTTATTTGTTAATCCCACTAATAA------AGTTCTAATTTTATTAATTCGATTCTAATTTTCGAATTTT-------TTAGTTTTTTTAATAG--AAAATA-AAAGAAAAGAGAAAGTTGTAA---TTTTATGCCTCTTAGAT-CTTCATTTCTATTT---------------TAAATGGTAG-AAATTGAAACCTTTTTATTAAATATTTTATTAAATAGAAATA-AAAAAAATTTTAAATCGTGG-AGGAAGGGGGGGCGGATGTAGCCAAGTGG
>LC15
CTGCTATTGA--GCCCCATCTACAAAT-GGATAA-TTCTGTC-TTAGTGGA-GACGA-GTTTTTGAAAATAACGG-AGAAATACCGACTCTCTTGCAAGAGAGTCGGTATTTCTCCGTTATTTTTTATGTTTT-TCTTTAGTAG---------------TTTTTTATTTCTATCCTTTTTT-TACGAAAAGTAT-TTTTATGCTTTTGCT--TTGATTTTGTCTGATATTTTTGTT----ATGGTTATGGGCTCATATTCGTTATGTACCAGTA--TAATAATATTAGTTATTTGTTAATCCCACTAATAA------AGTTCTAATTTTATTAATTCGATTCTAATTTTCGAATTTT-------TTAGTTTTTTTAATAG--AAAATA-AAAGAAAAGAGAAAGTTGTAA---TTTTATGCCTCTTAGAT-CTTCATTTCTATTT---------------TAAATGGTAG-AAATTGAAACCTTTTTATTAAATATTTTATTAAATAGAAATA-AAAAAAATTTTAAATCGTGG-AGGAAGGGGGGGCGGATGTAGCCAAGTGG

H3
>XJ05
CTGCTATTGA--GCCCCATCTACAAAT-GGATAA-TTCTGTC-TTAGTGGA-GACGA-GTTTTTGAAAATAACGG-AGAAATACCGACTCTCTTGCAAGAGAGTCGGTATTTCTCCGTTATTTTTTATGTTTT-TCTTTAGTAG---------------TTTTTTATTTCTATCCTTTTTT-TACGAAAAGTAT-TTTTATGCTTTTGCT--TTGATTTTGTCTGATATTTTTGTT----ATGGTTATGAGCTCATATTCGTTATGTACCAGTA--TAATAATATTAGTTATTTGTTAATCCCACTAATAA------AGTTCTAATTTTATTAATTCGATTCTAATTTTCGAATTTT-------TTAGTTTTTTTAATAG--AAAATA-AAAGAAAAGAGAAAGTTGTAA---TTTTATGCCTCTTAGAT-CTTCATTTCTATTT---------------TAAATGGTAG-AAATTGAAACCTTTTTATTAAATATTTTATTAAATAGAAATA-AAAAAAATTTTAAATCGTGG-AGGAAGGGGGGGCGGATGTAGCCAAGTGG
>SC10
CTGCTATTGA--GCCCCATCTACAAAT-GGATAA-TTCTGTC-TTAGTGGA-GACGA-GTTTTTGAAAATAACGG-AGAAATACCGACTCTCTTGCAAGAGAGTCGGTATTTCTCCGTTATTTTTTATGTTTT-TCTTTAGTAG---------------TTTTTTATTTCTATCCTTTTTT-TACGAAAAGTAT-TTTTATGCTTTTGCT--TTGATTTTGTCTGATATTTTTGTT----ATGGTTATGAGCTCATATTCGTTATGTACCAGTA--TAATAATATTAGTTATTTGTTAATCCCACTAATAA------AGTTCTAATTTTATTAATTCGATTCTAATTTTCGAATTTT-------TTAGTTTTTTTAATAG--AAAATA-AAAGAAAAGAGAAAGTTGTAA---TTTTATGCCTCTTAGAT-CTTCATTTCTATTT---------------TAAATGGTAG-AAATTGAAACCTTTTTATTAAATATTTTATTAAATAGAAATA-AAAAAAATTTTAAATCGTGG-AGGAAGGGGGGGCGGATGTAGCCAAGTGG
>JX02
CTGCTATTGA--GCCCCATCTACAAAT-GGATAA-TTCTGTC-TTAGTGGA-GACGA-GTTTTTGAAAATAACGG-AGAAATACCGACTCTCTTGCAAGAGAGTCGGTATTTCTCCGTTATTTTTTATGTTTT-TCTTTAGTAG---------------TTTTTTATTTCTATCCTTTTTT-TACGAAAAGTAT-TTTTATGCTTTTGCT--TTGATTTTGTCTGATATTTTTGTT----ATGGTTATGAGCTCATATTCGTTATGTACCAGTA--TAATAATATTAGTTATTTGTTAATCCCACTAATAA------AGTTCTAATTTTATTAATTCGATTCTAATTTTCGAATTTT-------TTAGTTTTTTTAATAG--AAAATA-AAAGAAAAGAGAAAGTTGTAA---TTTTATGCCTCTTAGAT-CTTCATTTCTATTT---------------TAAATGGTAG-AAATTGAAACCTTTTTATTAAATATTTTATTAAATAGAAATA-AAAAAAATTTTAAATCGTGG-AGGAAGGGGGGGCGGATGTAGCCAAGTGG
>HP02
CTGCTATTGA--GCCCCATCTACAAAT-GGATAA-TTCTGTC-TTAGTGGA-GACGA-GTTTTTGAAAATAACGG-AGAAATACCGACTCTCTTGCAAGAGAGTCGGTATTTCTCCGTTATTTTTTATGTTTT-TCTTTAGTAG---------------TTTTTTATTTCTATCCTTTTTT-TACGAAAAGTAT-TTTTATGCTTTTGCT--TTGATTTTGTCTGATATTTTTGTT----ATGGTTATGAGCTCATATTCGTTATGTACCAGTA--TAATAATATTAGTTATTTGTTAATCCCACTAATAA------AGTTCTAATTTTATTAATTCGATTCTAATTTTCGAATTTT-------TTAGTTTTTTTAATAG--AAAATA-AAAGAAAAGAGAAAGTTGTAA---TTTTATGCCTCTTAGAT-CTTCATTTCTATTT---------------TAAATGGTAG-AAATTGAAACCTTTTTATTAAATATTTTATTAAATAGAAATA-AAAAAAATTTTAAATCGTGG-AGGAAGGGGGGGCGGATGTAGCCAAGTGG

H4
>LL01
CTGCTATTGA--GCCCCATCTACAAAT-GGATAA-TTCTGTC-TTAGTGGA-GACGA-GTTTTTGAAAATAACGG-AGAAATACCGACTCTCTTGCA-GAGAGTCGGTATTTCTCAGTTATTTTTTATGTTTT-TCTTTAGTAG---------------TTTTTTATTTCTATCTTTTTTT-TACGAAAAGTAT-TTTTATGCTTTTGCT--TTGATTTTGTCTGATATTTTTGTT----ATGGTTATGGGCTCATATTCGTTATGTACCAGTA--TAATAATATTAGTTATTTGTTAATCCCACTAATAA------AGTTCTAATTTTATTAATTCGATTCTAATTTTCGAATTTT-------TTAGTTTTTTTAATAT--AAAATA-AAAGAAAAGAGAAAGTTGTAA---TTTTATGCCTCTTAGAT-CTTCATTTCTATTTTAATCATTTCTATTTTAAATGGTAG-AAATTGAAACCTTTTTATTAAATATTTTATTAAATAGAAATA-AAAAAATTTTTAAATCGTGG-AGGAAGGGGGGGCGGATGTAGCCAAGTGG
>LL05
CTGCTATTGA--GCCCCATCTACAAAT-GGATAA-TTCTGTC-TTAGTGGA-GACGA-GTTTTTGAAAATAACGG-AGAAATACCGACTCTCTTGCA-GAGAGTCGGTATTTCTCAGTTATTTTTTATGTTTT-TCTTTAGTAG---------------TTTTTTATTTCTATCTTTTTTT-TACGAAAAGTAT-TTTTATGCTTTTGCT--TTGATTTTGTCTGATATTTTTGTT----ATGGTTATGGGCTCATATTCGTTATGTACCAGTA--TAATAATATTAGTTATTTGTTAATCCCACTAATAA------AGTTCTAATTTTATTAATTCGATTCTAATTTTCGAATTTT-------TTAGTTTTTTTAATAT--AAAATA-AAAGAAAAGAGAAAGTTGTAA---TTTTATGCCTCTTAGAT-CTTCATTTCTATTTTAATCATTTCTATTTTAAATGGTAG-AAATTGAAACCTTTTTATTAAATATTTTATTAAATAGAAATA-AAAAAATTTTTAAATCGTGG-AGGAAGGGGGGGCGGATGTAGCCAAGTGG
>LL09
CTGCTATTGA--GCCCCATCTACAAAT-GGATAA-TTCTGTC-TTAGTGGA-GACGA-GTTTTTGAAAATAACGG-AGAAATACCGACTCTCTTGCA-GAGAGTCGGTATTTCTCAGTTATTTTTTATGTTTT-TCTTTAGTAG---------------TTTTTTATTTCTATCTTTTTTT-TACGAAAAGTAT-TTTTATGCTTTTGCT--TTGATTTTGTCTGATATTTTTGTT----ATGGTTATGGGCTCATATTCGTTATGTACCAGTA--TAATAATATTAGTTATTTGTTAATCCCACTAATAA------AGTTCTAATTTTATTAATTCGATTCTAATTTTCGAATTTT-------TTAGTTTTTTTAATAT--AAAATA-AAAGAAAAGAGAAAGTTGTAA---TTTTATGCCTCTTAGAT-CTTCATTTCTATTTTAATCATTTCTATTTTAAATGGTAG-AAATTGAAACCTTTTTATTAAATATTTTATTAAATAGAAATA-AAAAAATTTTTAAATCGTGG-AGGAAGGGGGGGCGGATGTAGCCAAGTGG
>LL10
CTGCTATTGA--GCCCCATCTACAAAT-GGATAA-TTCTGTC-TTAGTGGA-GACGA-GTTTTTGAAAATAACGG-AGAAATACCGACTCTCTTGCA-GAGAGTCGGTATTTCTCAGTTATTTTTTATGTTTT-TCTTTAGTAG---------------TTTTTTATTTCTATCTTTTTTT-TACGAAAAGTAT-TTTTATGCTTTTGCT--TTGATTTTGTCTGATATTTTTGTT----ATGGTTATGGGCTCATATTCGTTATGTACCAGTA--TAATAATATTAGTTATTTGTTAATCCCACTAATAA------AGTTCTAATTTTATTAATTCGATTCTAATTTTCGAATTTT-------TTAGTTTTTTTAATAT--AAAATA-AAAGAAAAGAGAAAGTTGTAA---TTTTATGCCTCTTAGAT-CTTCATTTCTATTTTAATCATTTCTATTTTAAATGGTAG-AAATTGAAACCTTTTTATTAAATATTTTATTAAATAGAAATA-AAAAAATTTTTAAATCGTGG-AGGAAGGGGGGGCGGATGTAGCCAAGTGG
>XY04
CTGCTATTGA--GCCCCATCTACAAAT-GGATAA-TTCTGTC-TTAGTGGA-GACGA-GTTTTTGAAAATAACGG-AGAAATACCGACTCTCTTGCA-GAGAGTCGGTATTTCTCAGTTATTTTTTATGTTTT-TCTTTAGTAG---------------TTTTTTATTTCTATCTTTTTTT-TACGAAAAGTAT-TTTTATGCTTTTGCT--TTGATTTTGTCTGATATTTTTGTT----ATGGTTATGGGCTCATATTCGTTATGTACCAGTA--TAATAATATTAGTTATTTGTTAATCCCACTAATAA------AGTTCTAATTTTATTAATTCGATTCTAATTTTCGAATTTT-------TTAGTTTTTTTAATAT--AAAATA-AAAGAAAAGAGAAAGTTGTAA---TTTTATGCCTCTTAGAT-CTTCATTTCTATTTTAATCATTTCTATTTTAAATGGTAG-AAATTGAAACCTTTTTATTAAATATTTTATTAAATAGAAATA-AAAAAATTTTTAAATCGTGG-AGGAAGGGGGGGCGGATGTAGCCAAGTGG
>XY14
CTGCTATTGA--GCCCCATCTACAAAT-GGATAA-TTCTGTC-TTAGTGGA-GACGA-GTTTTTGAAAATAACGG-AGAAATACCGACTCTCTTGCA-GAGAGTCGGTATTTCTCAGTTATTTTTTATGTTTT-TCTTTAGTAG---------------TTTTTTATTTCTATCTTTTTTT-TACGAAAAGTAT-TTTTATGCTTTTGCT--TTGATTTTGTCTGATATTTTTGTT----ATGGTTATGGGCTCATATTCGTTATGTACCAGTA--TAATAATATTAGTTATTTGTTAATCCCACTAATAA------AGTTCTAATTTTATTAATTCGATTCTAATTTTCGAATTTT-------TTAGTTTTTTTAATAT--AAAATA-AAAGAAAAGAGAAAGTTGTAA---TTTTATGCCTCTTAGAT-CTTCATTTCTATTTTAATCATTTCTATTTTAAATGGTAG-AAATTGAAACCTTTTTATTAAATATTTTATTAAATAGAAATA-AAAAAATTTTTAAATCGTGG-AGGAAGGGGGGGCGGATGTAGCCAAGTGG
>XY15
CTGCTATTGA--GCCCCATCTACAAAT-GGATAA-TTCTGTC-TTAGTGGA-GACGA-GTTTTTGAAAATAACGG-AGAAATACCGACTCTCTTGCA-GAGAGTCGGTATTTCTCAGTTATTTTTTATGTTTT-TCTTTAGTAG---------------TTTTTTATTTCTATCTTTTTTT-TACGAAAAGTAT-TTTTATGCTTTTGCT--TTGATTTTGTCTGATATTTTTGTT----ATGGTTATGGGCTCATATTCGTTATGTACCAGTA--TAATAATATTAGTTATTTGTTAATCCCACTAATAA------AGTTCTAATTTTATTAATTCGATTCTAATTTTCGAATTTT-------TTAGTTTTTTTAATAT--AAAATA-AAAGAAAAGAGAAAGTTGTAA---TTTTATGCCTCTTAGAT-CTTCATTTCTATTTTAATCATTTCTATTTTAAATGGTAG-AAATTGAAACCTTTTTATTAAATATTTTATTAAATAGAAATA-AAAAAATTTTTAAATCGTGG-AGGAAGGGGGGGCGGATGTAGCCAAGTGG
>XL10
CTGCTATTGA--GCCCCATCTACAAAT-GGATAA-TTCTGTC-TTAGTGGA-GACGA-GTTTTTGAAAATAACGG-AGAAATACCGACTCTCTTGCA-GAGAGTCGGTATTTCTCAGTTATTTTTTATGTTTT-TCTTTAGTAG---------------TTTTTTATTTCTATCTTTTTTT-TACGAAAAGTAT-TTTTATGCTTTTGCT--TTGATTTTGTCTGATATTTTTGTT----ATGGTTATGGGCTCATATTCGTTATGTACCAGTA--TAATAATATTAGTTATTTGTTAATCCCACTAATAA------AGTTCTAATTTTATTAATTCGATTCTAATTTTCGAATTTT-------TTAGTTTTTTTAATAT--AAAATA-AAAGAAAAGAGAAAGTTGTAA---TTTTATGCCTCTTAGAT-CTTCATTTCTATTTTAATCATTTCTATTTTAAATGGTAG-AAATTGAAACCTTTTTATTAAATATTTTATTAAATAGAAATA-AAAAAATTTTTAAATCGTGG-AGGAAGGGGGGGCGGATGTAGCCAAGTGG
>XL19
CTGCTATTGA--GCCCCATCTACAAAT-GGATAA-TTCTGTC-TTAGTGGA-GACGA-GTTTTTGAAAATAACGG-AGAAATACCGACTCTCTTGCA-GAGAGTCGGTATTTCTCAGTTATTTTTTATGTTTT-TCTTTAGTAG---------------TTTTTTATTTCTATCTTTTTTT-TACGAAAAGTAT-TTTTATGCTTTTGCT--TTGATTTTGTCTGATATTTTTGTT----ATGGTTATGGGCTCATATTCGTTATGTACCAGTA--TAATAATATTAGTTATTTGTTAATCCCACTAATAA------AGTTCTAATTTTATTAATTCGATTCTAATTTTCGAATTTT-------TTAGTTTTTTTAATAT--AAAATA-AAAGAAAAGAGAAAGTTGTAA---TTTTATGCCTCTTAGAT-CTTCATTTCTATTTTAATCATTTCTATTTTAAATGGTAG-AAATTGAAACCTTTTTATTAAATATTTTATTAAATAGAAATA-AAAAAATTTTTAAATCGTGG-AGGAAGGGGGGGCGGATGTAGCCAAGTGG
>XL20
CTGCTATTGA--GCCCCATCTACAAAT-GGATAA-TTCTGTC-TTAGTGGA-GACGA-GTTTTTGAAAATAACGG-AGAAATACCGACTCTCTTGCA-GAGAGTCGGTATTTCTCAGTTATTTTTTATGTTTT-TCTTTAGTAG---------------TTTTTTATTTCTATCTTTTTTT-TACGAAAAGTAT-TTTTATGCTTTTGCT--TTGATTTTGTCTGATATTTTTGTT----ATGGTTATGGGCTCATATTCGTTATGTACCAGTA--TAATAATATTAGTTATTTGTTAATCCCACTAATAA------AGTTCTAATTTTATTAATTCGATTCTAATTTTCGAATTTT-------TTAGTTTTTTTAATAT--AAAATA-AAAGAAAAGAGAAAGTTGTAA---TTTTATGCCTCTTAGAT-CTTCATTTCTATTTTAATCATTTCTATTTTAAATGGTAG-AAATTGAAACCTTTTTATTAAATATTTTATTAAATAGAAATA-AAAAAATTTTTAAATCGTGG-AGGAAGGGGGGGCGGATGTAGCCAAGTGG
>WM15
CTGCTATTGA--GCCCCATCTACAAAT-GGATAA-TTCTGTC-TTAGTGGA-GACGA-GTTTTTGAAAATAACGG-AGAAATACCGACTCTCTTGCA-GAGAGTCGGTATTTCTCAGTTATTTTTTATGTTTT-TCTTTAGTAG---------------TTTTTTATTTCTATCTTTTTTT-TACGAAAAGTAT-TTTTATGCTTTTGCT--TTGATTTTGTCTGATATTTTTGTT----ATGGTTATGGGCTCATATTCGTTATGTACCAGTA--TAATAATATTAGTTATTTGTTAATCCCACTAATAA------AGTTCTAATTTTATTAATTCGATTCTAATTTTCGAATTTT-------TTAGTTTTTTTAATAT--AAAATA-AAAGAAAAGAGAAAGTTGTAA---TTTTATGCCTCTTAGAT-CTTCATTTCTATTTTAATCATTTCTATTTTAAATGGTAG-AAATTGAAACCTTTTTATTAAATATTTTATTAAATAGAAATA-AAAAAATTTTTAAATCGTGG-AGGAAGGGGGGGCGGATGTAGCCAAGTGG

H5
>DC19
CTGCTATTGA--GCCCCATCTACAAAT-GGATAA-TTCTGTC-TTAGTAGA-GACG-AGTTTTTGAAAATAACGG-AGAAATACCGACTCTCTTGCAAGAGAGTCGGTATTTCTCCGTTATTTTTTATGTTTT-TCTTTAATAG---------------TTTTTTATTTCTATCTTTTTTT-TACGAAAAGTAT-TTTTATGCTTTTGCT--TTTATTTTGTCTGATATTTTTGTT----ATGGTTATGGGCTCATATTCGTTATGTACCAGTA--TAATAATATTAGTTATTTGTTAATCCCACTAATAA------AGTTCTAATTTTATTAATTCGATTCTAATTTTCGAATTTT-------TTAGTTTTTTTAATAT--AAAATA-AAAGAAAAGAGAAAGTTGTAA---TTTTATGCCTCTTAAAT-CTTCATTTCTAT---------------TTTAAATGGTAG-AAATTGAAACCTTTTTATTAAATATTTTATTAAATAGAAATA-AAAAAAATTTTAAATCGTGG-AGGAAGGGGGGGCGGATGTAGCCAAGTGG
>DC29
CTGCTATTGA--GCCCCATCTACAAAT-GGATAA-TTCTGTC-TTAGTAGA-GACG-AGTTTTTGAAAATAACGG-AGAAATACCGACTCTCTTGCAAGAGAGTCGGTATTTCTCCGTTATTTTTTATGTTTT-TCTTTAATAG---------------TTTTTTATTTCTATCTTTTTTT-TACGAAAAGTAT-TTTTATGCTTTTGCT--TTTATTTTGTCTGATATTTTTGTT----ATGGTTATGGGCTCATATTCGTTATGTACCAGTA--TAATAATATTAGTTATTTGTTAATCCCACTAATAA------AGTTCTAATTTTATTAATTCGATTCTAATTTTCGAATTTT-------TTAGTTTTTTTAATAT--AAAATA-AAAGAAAAGAGAAAGTTGTAA---TTTTATGCCTCTTAAAT-CTTCATTTCTAT---------------TTTAAATGGTAG-AAATTGAAACCTTTTTATTAAATATTTTATTAAATAGAAATA-AAAAAAATTTTAAATCGTGG-AGGAAGGGGGGGCGGATGTAGCCAAGTGG

H6
>LL03
CTGCTATTGA--GCCCCATCTACAAAT-GGATAA-TTCTGTC-TTAGTGGA-GACG-AGTTTTTGAAAATAACGG-AGAAATACCGACTCTCTTGCAAGAGAGTCGGTATTTCTCCGTTATTTTTTATGTTTT-TCTTTAGTAG---------------TTTTTTATTTCTATCTTTTTTT-TACGAAAAGTAT-TTTTATGCTTTTGCT--TTGATTTTGTCTGATATTTTTGTT----ATGGTTATGGGCTCATATTCGTTATGTACCAGTA--TAATAATATTAGTTATTTGTTAATCCCACTAATAA------AGTTCTAATTTTATTAATTCGATTCTAATTTTCGAATTTT-------TTAGTTTTTTTAATAT--AAAATA-AAAGAAAAGAGAAAGTTGTAA---TTTTATGCCTCTTAGAT-CTTCATTTCTATTTTAATCATTTCTATTTTAAATGGTAG-AAATTGAAACCTTTTTATTAAATATTTTATTAAATAGAAATA-AAAAAATTTTTAAATCGTGG-AGGAAGGGGGGGCGGATGTAGCCAAGTGG
>LL04
CTGCTATTGA--GCCCCATCTACAAAT-GGATAA-TTCTGTC-TTAGTGGA-GACG-AGTTTTTGAAAATAACGG-AGAAATACCGACTCTCTTGCAAGAGAGTCGGTATTTCTCCGTTATTTTTTATGTTTT-TCTTTAGTAG---------------TTTTTTATTTCTATCTTTTTTT-TACGAAAAGTAT-TTTTATGCTTTTGCT--TTGATTTTGTCTGATATTTTTGTT----ATGGTTATGGGCTCATATTCGTTATGTACCAGTA--TAATAATATTAGTTATTTGTTAATCCCACTAATAA------AGTTCTAATTTTATTAATTCGATTCTAATTTTCGAATTTT-------TTAGTTTTTTTAATAT--AAAATA-AAAGAAAAGAGAAAGTTGTAA---TTTTATGCCTCTTAGAT-CTTCATTTCTATTTTAATCATTTCTATTTTAAATGGTAG-AAATTGAAACCTTTTTATTAAATATTTTATTAAATAGAAATA-AAAAAATTTTTAAATCGTGG-AGGAAGGGGGGGCGGATGTAGCCAAGTGG
>LL06
CTGCTATTGA--GCCCCATCTACAAAT-GGATAA-TTCTGTC-TTAGTGGA-GACG-AGTTTTTGAAAATAACGG-AGAAATACCGACTCTCTTGCAAGAGAGTCGGTATTTCTCCGTTATTTTTTATGTTTT-TCTTTAGTAG---------------TTTTTTATTTCTATCTTTTTTT-TACGAAAAGTAT-TTTTATGCTTTTGCT--TTGATTTTGTCTGATATTTTTGTT----ATGGTTATGGGCTCATATTCGTTATGTACCAGTA--TAATAATATTAGTTATTTGTTAATCCCACTAATAA------AGTTCTAATTTTATTAATTCGATTCTAATTTTCGAATTTT-------TTAGTTTTTTTAATAT--AAAATA-AAAGAAAAGAGAAAGTTGTAA---TTTTATGCCTCTTAGAT-CTTCATTTCTATTTTAATCATTTCTATTTTAAATGGTAG-AAATTGAAACCTTTTTATTAAATATTTTATTAAATAGAAATA-AAAAAATTTTTAAATCGTGG-AGGAAGGGGGGGCGGATGTAGCCAAGTGG
>LL07
CTGCTATTGA--GCCCCATCTACAAAT-GGATAA-TTCTGTC-TTAGTGGA-GACG-AGTTTTTGAAAATAACGG-AGAAATACCGACTCTCTTGCAAGAGAGTCGGTATTTCTCCGTTATTTTTTATGTTTT-TCTTTAGTAG---------------TTTTTTATTTCTATCTTTTTTT-TACGAAAAGTAT-TTTTATGCTTTTGCT--TTGATTTTGTCTGATATTTTTGTT----ATGGTTATGGGCTCATATTCGTTATGTACCAGTA--TAATAATATTAGTTATTTGTTAATCCCACTAATAA------AGTTCTAATTTTATTAATTCGATTCTAATTTTCGAATTTT-------TTAGTTTTTTTAATAT--AAAATA-AAAGAAAAGAGAAAGTTGTAA---TTTTATGCCTCTTAGAT-CTTCATTTCTATTTTAATCATTTCTATTTTAAATGGTAG-AAATTGAAACCTTTTTATTAAATATTTTATTAAATAGAAATA-AAAAAATTTTTAAATCGTGG-AGGAAGGGGGGGCGGATGTAGCCAAGTGG
>XY01
CTGCTATTGA--GCCCCATCTACAAAT-GGATAA-TTCTGTC-TTAGTGGA-GACG-AGTTTTTGAAAATAACGG-AGAAATACCGACTCTCTTGCAAGAGAGTCGGTATTTCTCCGTTATTTTTTATGTTTT-TCTTTAGTAG---------------TTTTTTATTTCTATCTTTTTTT-TACGAAAAGTAT-TTTTATGCTTTTGCT--TTGATTTTGTCTGATATTTTTGTT----ATGGTTATGGGCTCATATTCGTTATGTACCAGTA--TAATAATATTAGTTATTTGTTAATCCCACTAATAA------AGTTCTAATTTTATTAATTCGATTCTAATTTTCGAATTTT-------TTAGTTTTTTTAATAT--AAAATA-AAAGAAAAGAGAAAGTTGTAA---TTTTATGCCTCTTAGAT-CTTCATTTCTATTTTAATCATTTCTATTTTAAATGGTAG-AAATTGAAACCTTTTTATTAAATATTTTATTAAATAGAAATA-AAAAAATTTTTAAATCGTGG-AGGAAGGGGGGGCGGATGTAGCCAAGTGG
>XY02
CTGCTATTGA--GCCCCATCTACAAAT-GGATAA-TTCTGTC-TTAGTGGA-GACG-AGTTTTTGAAAATAACGG-AGAAATACCGACTCTCTTGCAAGAGAGTCGGTATTTCTCCGTTATTTTTTATGTTTT-TCTTTAGTAG---------------TTTTTTATTTCTATCTTTTTTT-TACGAAAAGTAT-TTTTATGCTTTTGCT--TTGATTTTGTCTGATATTTTTGTT----ATGGTTATGGGCTCATATTCGTTATGTACCAGTA--TAATAATATTAGTTATTTGTTAATCCCACTAATAA------AGTTCTAATTTTATTAATTCGATTCTAATTTTCGAATTTT-------TTAGTTTTTTTAATAT--AAAATA-AAAGAAAAGAGAAAGTTGTAA---TTTTATGCCTCTTAGAT-CTTCATTTCTATTTTAATCATTTCTATTTTAAATGGTAG-AAATTGAAACCTTTTTATTAAATATTTTATTAAATAGAAATA-AAAAAATTTTTAAATCGTGG-AGGAAGGGGGGGCGGATGTAGCCAAGTGG
>XY05
CTGCTATTGA--GCCCCATCTACAAAT-GGATAA-TTCTGTC-TTAGTGGA-GACG-AGTTTTTGAAAATAACGG-AGAAATACCGACTCTCTTGCAAGAGAGTCGGTATTTCTCCGTTATTTTTTATGTTTT-TCTTTAGTAG---------------TTTTTTATTTCTATCTTTTTTT-TACGAAAAGTAT-TTTTATGCTTTTGCT--TTGATTTTGTCTGATATTTTTGTT----ATGGTTATGGGCTCATATTCGTTATGTACCAGTA--TAATAATATTAGTTATTTGTTAATCCCACTAATAA------AGTTCTAATTTTATTAATTCGATTCTAATTTTCGAATTTT-------TTAGTTTTTTTAATAT--AAAATA-AAAGAAAAGAGAAAGTTGTAA---TTTTATGCCTCTTAGAT-CTTCATTTCTATTTTAATCATTTCTATTTTAAATGGTAG-AAATTGAAACCTTTTTATTAAATATTTTATTAAATAGAAATA-AAAAAATTTTTAAATCGTGG-AGGAAGGGGGGGCGGATGTAGCCAAGTGG
>XY06
CTGCTATTGA--GCCCCATCTACAAAT-GGATAA-TTCTGTC-TTAGTGGA-GACG-AGTTTTTGAAAATAACGG-AGAAATACCGACTCTCTTGCAAGAGAGTCGGTATTTCTCCGTTATTTTTTATGTTTT-TCTTTAGTAG---------------TTTTTTATTTCTATCTTTTTTT-TACGAAAAGTAT-TTTTATGCTTTTGCT--TTGATTTTGTCTGATATTTTTGTT----ATGGTTATGGGCTCATATTCGTTATGTACCAGTA--TAATAATATTAGTTATTTGTTAATCCCACTAATAA------AGTTCTAATTTTATTAATTCGATTCTAATTTTCGAATTTT-------TTAGTTTTTTTAATAT--AAAATA-AAAGAAAAGAGAAAGTTGTAA---TTTTATGCCTCTTAGAT-CTTCATTTCTATTTTAATCATTTCTATTTTAAATGGTAG-AAATTGAAACCTTTTTATTAAATATTTTATTAAATAGAAATA-AAAAAATTTTTAAATCGTGG-AGGAAGGGGGGGCGGATGTAGCCAAGTGG
>XY07
CTGCTATTGA--GCCCCATCTACAAAT-GGATAA-TTCTGTC-TTAGTGGA-GACG-AGTTTTTGAAAATAACGG-AGAAATACCGACTCTCTTGCAAGAGAGTCGGTATTTCTCCGTTATTTTTTATGTTTT-TCTTTAGTAG---------------TTTTTTATTTCTATCTTTTTTT-TACGAAAAGTAT-TTTTATGCTTTTGCT--TTGATTTTGTCTGATATTTTTGTT----ATGGTTATGGGCTCATATTCGTTATGTACCAGTA--TAATAATATTAGTTATTTGTTAATCCCACTAATAA------AGTTCTAATTTTATTAATTCGATTCTAATTTTCGAATTTT-------TTAGTTTTTTTAATAT--AAAATA-AAAGAAAAGAGAAAGTTGTAA---TTTTATGCCTCTTAGAT-CTTCATTTCTATTTTAATCATTTCTATTTTAAATGGTAG-AAATTGAAACCTTTTTATTAAATATTTTATTAAATAGAAATA-AAAAAATTTTTAAATCGTGG-AGGAAGGGGGGGCGGATGTAGCCAAGTGG
>XY08
CTGCTATTGA--GCCCCATCTACAAAT-GGATAA-TTCTGTC-TTAGTGGA-GACG-AGTTTTTGAAAATAACGG-AGAAATACCGACTCTCTTGCAAGAGAGTCGGTATTTCTCCGTTATTTTTTATGTTTT-TCTTTAGTAG---------------TTTTTTATTTCTATCTTTTTTT-TACGAAAAGTAT-TTTTATGCTTTTGCT--TTGATTTTGTCTGATATTTTTGTT----ATGGTTATGGGCTCATATTCGTTATGTACCAGTA--TAATAATATTAGTTATTTGTTAATCCCACTAATAA------AGTTCTAATTTTATTAATTCGATTCTAATTTTCGAATTTT-------TTAGTTTTTTTAATAT--AAAATA-AAAGAAAAGAGAAAGTTGTAA---TTTTATGCCTCTTAGAT-CTTCATTTCTATTTTAATCATTTCTATTTTAAATGGTAG-AAATTGAAACCTTTTTATTAAATATTTTATTAAATAGAAATA-AAAAAATTTTTAAATCGTGG-AGGAAGGGGGGGCGGATGTAGCCAAGTGG
>XY09
CTGCTATTGA--GCCCCATCTACAAAT-GGATAA-TTCTGTC-TTAGTGGA-GACG-AGTTTTTGAAAATAACGG-AGAAATACCGACTCTCTTGCAAGAGAGTCGGTATTTCTCCGTTATTTTTTATGTTTT-TCTTTAGTAG---------------TTTTTTATTTCTATCTTTTTTT-TACGAAAAGTAT-TTTTATGCTTTTGCT--TTGATTTTGTCTGATATTTTTGTT----ATGGTTATGGGCTCATATTCGTTATGTACCAGTA--TAATAATATTAGTTATTTGTTAATCCCACTAATAA------AGTTCTAATTTTATTAATTCGATTCTAATTTTCGAATTTT-------TTAGTTTTTTTAATAT--AAAATA-AAAGAAAAGAGAAAGTTGTAA---TTTTATGCCTCTTAGAT-CTTCATTTCTATTTTAATCATTTCTATTTTAAATGGTAG-AAATTGAAACCTTTTTATTAAATATTTTATTAAATAGAAATA-AAAAAATTTTTAAATCGTGG-AGGAAGGGGGGGCGGATGTAGCCAAGTGG
>XY11
CTGCTATTGA--GCCCCATCTACAAAT-GGATAA-TTCTGTC-TTAGTGGA-GACG-AGTTTTTGAAAATAACGG-AGAAATACCGACTCTCTTGCAAGAGAGTCGGTATTTCTCCGTTATTTTTTATGTTTT-TCTTTAGTAG---------------TTTTTTATTTCTATCTTTTTTT-TACGAAAAGTAT-TTTTATGCTTTTGCT--TTGATTTTGTCTGATATTTTTGTT----ATGGTTATGGGCTCATATTCGTTATGTACCAGTA--TAATAATATTAGTTATTTGTTAATCCCACTAATAA------AGTTCTAATTTTATTAATTCGATTCTAATTTTCGAATTTT-------TTAGTTTTTTTAATAT--AAAATA-AAAGAAAAGAGAAAGTTGTAA---TTTTATGCCTCTTAGAT-CTTCATTTCTATTTTAATCATTTCTATTTTAAATGGTAG-AAATTGAAACCTTTTTATTAAATATTTTATTAAATAGAAATA-AAAAAATTTTTAAATCGTGG-AGGAAGGGGGGGCGGATGTAGCCAAGTGG
>XY13
CTGCTATTGA--GCCCCATCTACAAAT-GGATAA-TTCTGTC-TTAGTGGA-GACG-AGTTTTTGAAAATAACGG-AGAAATACCGACTCTCTTGCAAGAGAGTCGGTATTTCTCCGTTATTTTTTATGTTTT-TCTTTAGTAG---------------TTTTTTATTTCTATCTTTTTTT-TACGAAAAGTAT-TTTTATGCTTTTGCT--TTGATTTTGTCTGATATTTTTGTT----ATGGTTATGGGCTCATATTCGTTATGTACCAGTA--TAATAATATTAGTTATTTGTTAATCCCACTAATAA------AGTTCTAATTTTATTAATTCGATTCTAATTTTCGAATTTT-------TTAGTTTTTTTAATAT--AAAATA-AAAGAAAAGAGAAAGTTGTAA---TTTTATGCCTCTTAGAT-CTTCATTTCTATTTTAATCATTTCTATTTTAAATGGTAG-AAATTGAAACCTTTTTATTAAATATTTTATTAAATAGAAATA-AAAAAATTTTTAAATCGTGG-AGGAAGGGGGGGCGGATGTAGCCAAGTGG
>XL03
CTGCTATTGA--GCCCCATCTACAAAT-GGATAA-TTCTGTC-TTAGTGGA-GACG-AGTTTTTGAAAATAACGG-AGAAATACCGACTCTCTTGCAAGAGAGTCGGTATTTCTCCGTTATTTTTTATGTTTT-TCTTTAGTAG---------------TTTTTTATTTCTATCTTTTTTT-TACGAAAAGTAT-TTTTATGCTTTTGCT--TTGATTTTGTCTGATATTTTTGTT----ATGGTTATGGGCTCATATTCGTTATGTACCAGTA--TAATAATATTAGTTATTTGTTAATCCCACTAATAA------AGTTCTAATTTTATTAATTCGATTCTAATTTTCGAATTTT-------TTAGTTTTTTTAATAT--AAAATA-AAAGAAAAGAGAAAGTTGTAA---TTTTATGCCTCTTAGAT-CTTCATTTCTATTTTAATCATTTCTATTTTAAATGGTAG-AAATTGAAACCTTTTTATTAAATATTTTATTAAATAGAAATA-AAAAAATTTTTAAATCGTGG-AGGAAGGGGGGGCGGATGTAGCCAAGTGG
>XL06
CTGCTATTGA--GCCCCATCTACAAAT-GGATAA-TTCTGTC-TTAGTGGA-GACG-AGTTTTTGAAAATAACGG-AGAAATACCGACTCTCTTGCAAGAGAGTCGGTATTTCTCCGTTATTTTTTATGTTTT-TCTTTAGTAG---------------TTTTTTATTTCTATCTTTTTTT-TACGAAAAGTAT-TTTTATGCTTTTGCT--TTGATTTTGTCTGATATTTTTGTT----ATGGTTATGGGCTCATATTCGTTATGTACCAGTA--TAATAATATTAGTTATTTGTTAATCCCACTAATAA------AGTTCTAATTTTATTAATTCGATTCTAATTTTCGAATTTT-------TTAGTTTTTTTAATAT--AAAATA-AAAGAAAAGAGAAAGTTGTAA---TTTTATGCCTCTTAGAT-CTTCATTTCTATTTTAATCATTTCTATTTTAAATGGTAG-AAATTGAAACCTTTTTATTAAATATTTTATTAAATAGAAATA-AAAAAATTTTTAAATCGTGG-AGGAAGGGGGGGCGGATGTAGCCAAGTGG
>XL08
CTGCTATTGA--GCCCCATCTACAAAT-GGATAA-TTCTGTC-TTAGTGGA-GACG-AGTTTTTGAAAATAACGG-AGAAATACCGACTCTCTTGCAAGAGAGTCGGTATTTCTCCGTTATTTTTTATGTTTT-TCTTTAGTAG---------------TTTTTTATTTCTATCTTTTTTT-TACGAAAAGTAT-TTTTATGCTTTTGCT--TTGATTTTGTCTGATATTTTTGTT----ATGGTTATGGGCTCATATTCGTTATGTACCAGTA--TAATAATATTAGTTATTTGTTAATCCCACTAATAA------AGTTCTAATTTTATTAATTCGATTCTAATTTTCGAATTTT-------TTAGTTTTTTTAATAT--AAAATA-AAAGAAAAGAGAAAGTTGTAA---TTTTATGCCTCTTAGAT-CTTCATTTCTATTTTAATCATTTCTATTTTAAATGGTAG-AAATTGAAACCTTTTTATTAAATATTTTATTAAATAGAAATA-AAAAAATTTTTAAATCGTGG-AGGAAGGGGGGGCGGATGTAGCCAAGTGG
>XL09
CTGCTATTGA--GCCCCATCTACAAAT-GGATAA-TTCTGTC-TTAGTGGA-GACG-AGTTTTTGAAAATAACGG-AGAAATACCGACTCTCTTGCAAGAGAGTCGGTATTTCTCCGTTATTTTTTATGTTTT-TCTTTAGTAG---------------TTTTTTATTTCTATCTTTTTTT-TACGAAAAGTAT-TTTTATGCTTTTGCT--TTGATTTTGTCTGATATTTTTGTT----ATGGTTATGGGCTCATATTCGTTATGTACCAGTA--TAATAATATTAGTTATTTGTTAATCCCACTAATAA------AGTTCTAATTTTATTAATTCGATTCTAATTTTCGAATTTT-------TTAGTTTTTTTAATAT--AAAATA-AAAGAAAAGAGAAAGTTGTAA---TTTTATGCCTCTTAGAT-CTTCATTTCTATTTTAATCATTTCTATTTTAAATGGTAG-AAATTGAAACCTTTTTATTAAATATTTTATTAAATAGAAATA-AAAAAATTTTTAAATCGTGG-AGGAAGGGGGGGCGGATGTAGCCAAGTGG
>XL12
CTGCTATTGA--GCCCCATCTACAAAT-GGATAA-TTCTGTC-TTAGTGGA-GACG-AGTTTTTGAAAATAACGG-AGAAATACCGACTCTCTTGCAAGAGAGTCGGTATTTCTCCGTTATTTTTTATGTTTT-TCTTTAGTAG---------------TTTTTTATTTCTATCTTTTTTT-TACGAAAAGTAT-TTTTATGCTTTTGCT--TTGATTTTGTCTGATATTTTTGTT----ATGGTTATGGGCTCATATTCGTTATGTACCAGTA--TAATAATATTAGTTATTTGTTAATCCCACTAATAA------AGTTCTAATTTTATTAATTCGATTCTAATTTTCGAATTTT-------TTAGTTTTTTTAATAT--AAAATA-AAAGAAAAGAGAAAGTTGTAA---TTTTATGCCTCTTAGAT-CTTCATTTCTATTTTAATCATTTCTATTTTAAATGGTAG-AAATTGAAACCTTTTTATTAAATATTTTATTAAATAGAAATA-AAAAAATTTTTAAATCGTGG-AGGAAGGGGGGGCGGATGTAGCCAAGTGG
>XL13
CTGCTATTGA--GCCCCATCTACAAAT-GGATAA-TTCTGTC-TTAGTGGA-GACG-AGTTTTTGAAAATAACGG-AGAAATACCGACTCTCTTGCAAGAGAGTCGGTATTTCTCCGTTATTTTTTATGTTTT-TCTTTAGTAG---------------TTTTTTATTTCTATCTTTTTTT-TACGAAAAGTAT-TTTTATGCTTTTGCT--TTGATTTTGTCTGATATTTTTGTT----ATGGTTATGGGCTCATATTCGTTATGTACCAGTA--TAATAATATTAGTTATTTGTTAATCCCACTAATAA------AGTTCTAATTTTATTAATTCGATTCTAATTTTCGAATTTT-------TTAGTTTTTTTAATAT--AAAATA-AAAGAAAAGAGAAAGTTGTAA---TTTTATGCCTCTTAGAT-CTTCATTTCTATTTTAATCATTTCTATTTTAAATGGTAG-AAATTGAAACCTTTTTATTAAATATTTTATTAAATAGAAATA-AAAAAATTTTTAAATCGTGG-AGGAAGGGGGGGCGGATGTAGCCAAGTGG
>XL15
CTGCTATTGA--GCCCCATCTACAAAT-GGATAA-TTCTGTC-TTAGTGGA-GACG-AGTTTTTGAAAATAACGG-AGAAATACCGACTCTCTTGCAAGAGAGTCGGTATTTCTCCGTTATTTTTTATGTTTT-TCTTTAGTAG---------------TTTTTTATTTCTATCTTTTTTT-TACGAAAAGTAT-TTTTATGCTTTTGCT--TTGATTTTGTCTGATATTTTTGTT----ATGGTTATGGGCTCATATTCGTTATGTACCAGTA--TAATAATATTAGTTATTTGTTAATCCCACTAATAA------AGTTCTAATTTTATTAATTCGATTCTAATTTTCGAATTTT-------TTAGTTTTTTTAATAT--AAAATA-AAAGAAAAGAGAAAGTTGTAA---TTTTATGCCTCTTAGAT-CTTCATTTCTATTTTAATCATTTCTATTTTAAATGGTAG-AAATTGAAACCTTTTTATTAAATATTTTATTAAATAGAAATA-AAAAAATTTTTAAATCGTGG-AGGAAGGGGGGGCGGATGTAGCCAAGTGG
>XL16
CTGCTATTGA--GCCCCATCTACAAAT-GGATAA-TTCTGTC-TTAGTGGA-GACG-AGTTTTTGAAAATAACGG-AGAAATACCGACTCTCTTGCAAGAGAGTCGGTATTTCTCCGTTATTTTTTATGTTTT-TCTTTAGTAG---------------TTTTTTATTTCTATCTTTTTTT-TACGAAAAGTAT-TTTTATGCTTTTGCT--TTGATTTTGTCTGATATTTTTGTT----ATGGTTATGGGCTCATATTCGTTATGTACCAGTA--TAATAATATTAGTTATTTGTTAATCCCACTAATAA------AGTTCTAATTTTATTAATTCGATTCTAATTTTCGAATTTT-------TTAGTTTTTTTAATAT--AAAATA-AAAGAAAAGAGAAAGTTGTAA---TTTTATGCCTCTTAGAT-CTTCATTTCTATTTTAATCATTTCTATTTTAAATGGTAG-AAATTGAAACCTTTTTATTAAATATTTTATTAAATAGAAATA-AAAAAATTTTTAAATCGTGG-AGGAAGGGGGGGCGGATGTAGCCAAGTGG
>XL17
CTGCTATTGA--GCCCCATCTACAAAT-GGATAA-TTCTGTC-TTAGTGGA-GACG-AGTTTTTGAAAATAACGG-AGAAATACCGACTCTCTTGCAAGAGAGTCGGTATTTCTCCGTTATTTTTTATGTTTT-TCTTTAGTAG---------------TTTTTTATTTCTATCTTTTTTT-TACGAAAAGTAT-TTTTATGCTTTTGCT--TTGATTTTGTCTGATATTTTTGTT----ATGGTTATGGGCTCATATTCGTTATGTACCAGTA--TAATAATATTAGTTATTTGTTAATCCCACTAATAA------AGTTCTAATTTTATTAATTCGATTCTAATTTTCGAATTTT-------TTAGTTTTTTTAATAT--AAAATA-AAAGAAAAGAGAAAGTTGTAA---TTTTATGCCTCTTAGAT-CTTCATTTCTATTTTAATCATTTCTATTTTAAATGGTAG-AAATTGAAACCTTTTTATTAAATATTTTATTAAATAGAAATA-AAAAAATTTTTAAATCGTGG-AGGAAGGGGGGGCGGATGTAGCCAAGTGG
>XL23
CTGCTATTGA--GCCCCATCTACAAAT-GGATAA-TTCTGTC-TTAGTGGA-GACG-AGTTTTTGAAAATAACGG-AGAAATACCGACTCTCTTGCAAGAGAGTCGGTATTTCTCCGTTATTTTTTATGTTTT-TCTTTAGTAG---------------TTTTTTATTTCTATCTTTTTTT-TACGAAAAGTAT-TTTTATGCTTTTGCT--TTGATTTTGTCTGATATTTTTGTT----ATGGTTATGGGCTCATATTCGTTATGTACCAGTA--TAATAATATTAGTTATTTGTTAATCCCACTAATAA------AGTTCTAATTTTATTAATTCGATTCTAATTTTCGAATTTT-------TTAGTTTTTTTAATAT--AAAATA-AAAGAAAAGAGAAAGTTGTAA---TTTTATGCCTCTTAGAT-CTTCATTTCTATTTTAATCATTTCTATTTTAAATGGTAG-AAATTGAAACCTTTTTATTAAATATTTTATTAAATAGAAATA-AAAAAATTTTTAAATCGTGG-AGGAAGGGGGGGCGGATGTAGCCAAGTGG
>WM08
CTGCTATTGA--GCCCCATCTACAAAT-GGATAA-TTCTGTC-TTAGTGGA-GACG-AGTTTTTGAAAATAACGG-AGAAATACCGACTCTCTTGCAAGAGAGTCGGTATTTCTCCGTTATTTTTTATGTTTT-TCTTTAGTAG---------------TTTTTTATTTCTATCTTTTTTT-TACGAAAAGTAT-TTTTATGCTTTTGCT--TTGATTTTGTCTGATATTTTTGTT----ATGGTTATGGGCTCATATTCGTTATGTACCAGTA--TAATAATATTAGTTATTTGTTAATCCCACTAATAA------AGTTCTAATTTTATTAATTCGATTCTAATTTTCGAATTTT-------TTAGTTTTTTTAATAT--AAAATA-AAAGAAAAGAGAAAGTTGTAA---TTTTATGCCTCTTAGAT-CTTCATTTCTATTTTAATCATTTCTATTTTAAATGGTAG-AAATTGAAACCTTTTTATTAAATATTTTATTAAATAGAAATA-AAAAAATTTTTAAATCGTGG-AGGAAGGGGGGGCGGATGTAGCCAAGTGG
>WM09
CTGCTATTGA--GCCCCATCTACAAAT-GGATAA-TTCTGTC-TTAGTGGA-GACG-AGTTTTTGAAAATAACGG-AGAAATACCGACTCTCTTGCAAGAGAGTCGGTATTTCTCCGTTATTTTTTATGTTTT-TCTTTAGTAG---------------TTTTTTATTTCTATCTTTTTTT-TACGAAAAGTAT-TTTTATGCTTTTGCT--TTGATTTTGTCTGATATTTTTGTT----ATGGTTATGGGCTCATATTCGTTATGTACCAGTA--TAATAATATTAGTTATTTGTTAATCCCACTAATAA------AGTTCTAATTTTATTAATTCGATTCTAATTTTCGAATTTT-------TTAGTTTTTTTAATAT--AAAATA-AAAGAAAAGAGAAAGTTGTAA---TTTTATGCCTCTTAGAT-CTTCATTTCTATTTTAATCATTTCTATTTTAAATGGTAG-AAATTGAAACCTTTTTATTAAATATTTTATTAAATAGAAATA-AAAAAATTTTTAAATCGTGG-AGGAAGGGGGGGCGGATGTAGCCAAGTGG
>WM11
CTGCTATTGA--GCCCCATCTACAAAT-GGATAA-TTCTGTC-TTAGTGGA-GACG-AGTTTTTGAAAATAACGG-AGAAATACCGACTCTCTTGCAAGAGAGTCGGTATTTCTCCGTTATTTTTTATGTTTT-TCTTTAGTAG---------------TTTTTTATTTCTATCTTTTTTT-TACGAAAAGTAT-TTTTATGCTTTTGCT--TTGATTTTGTCTGATATTTTTGTT----ATGGTTATGGGCTCATATTCGTTATGTACCAGTA--TAATAATATTAGTTATTTGTTAATCCCACTAATAA------AGTTCTAATTTTATTAATTCGATTCTAATTTTCGAATTTT-------TTAGTTTTTTTAATAT--AAAATA-AAAGAAAAGAGAAAGTTGTAA---TTTTATGCCTCTTAGAT-CTTCATTTCTATTTTAATCATTTCTATTTTAAATGGTAG-AAATTGAAACCTTTTTATTAAATATTTTATTAAATAGAAATA-AAAAAATTTTTAAATCGTGG-AGGAAGGGGGGGCGGATGTAGCCAAGTGG
>WM12
CTGCTATTGA--GCCCCATCTACAAAT-GGATAA-TTCTGTC-TTAGTGGA-GACG-AGTTTTTGAAAATAACGG-AGAAATACCGACTCTCTTGCAAGAGAGTCGGTATTTCTCCGTTATTTTTTATGTTTT-TCTTTAGTAG---------------TTTTTTATTTCTATCTTTTTTT-TACGAAAAGTAT-TTTTATGCTTTTGCT--TTGATTTTGTCTGATATTTTTGTT----ATGGTTATGGGCTCATATTCGTTATGTACCAGTA--TAATAATATTAGTTATTTGTTAATCCCACTAATAA------AGTTCTAATTTTATTAATTCGATTCTAATTTTCGAATTTT-------TTAGTTTTTTTAATAT--AAAATA-AAAGAAAAGAGAAAGTTGTAA---TTTTATGCCTCTTAGAT-CTTCATTTCTATTTTAATCATTTCTATTTTAAATGGTAG-AAATTGAAACCTTTTTATTAAATATTTTATTAAATAGAAATA-AAAAAATTTTTAAATCGTGG-AGGAAGGGGGGGCGGATGTAGCCAAGTGG
>WM28
CTGCTATTGA--GCCCCATCTACAAAT-GGATAA-TTCTGTC-TTAGTGGA-GACG-AGTTTTTGAAAATAACGG-AGAAATACCGACTCTCTTGCAAGAGAGTCGGTATTTCTCCGTTATTTTTTATGTTTT-TCTTTAGTAG---------------TTTTTTATTTCTATCTTTTTTT-TACGAAAAGTAT-TTTTATGCTTTTGCT--TTGATTTTGTCTGATATTTTTGTT----ATGGTTATGGGCTCATATTCGTTATGTACCAGTA--TAATAATATTAGTTATTTGTTAATCCCACTAATAA------AGTTCTAATTTTATTAATTCGATTCTAATTTTCGAATTTT-------TTAGTTTTTTTAATAT--AAAATA-AAAGAAAAGAGAAAGTTGTAA---TTTTATGCCTCTTAGAT-CTTCATTTCTATTTTAATCATTTCTATTTTAAATGGTAG-AAATTGAAACCTTTTTATTAAATATTTTATTAAATAGAAATA-AAAAAATTTTTAAATCGTGG-AGGAAGGGGGGGCGGATGTAGCCAAGTGG
>LD01
CTGCTATTGA--GCCCCATCTACAAAT-GGATAA-TTCTGTC-TTAGTGGA-GACG-AGTTTTTGAAAATAACGG-AGAAATACCGACTCTCTTGCAAGAGAGTCGGTATTTCTCCGTTATTTTTTATGTTTT-TCTTTAGTAG---------------TTTTTTATTTCTATCTTTTTTT-TACGAAAAGTAT-TTTTATGCTTTTGCT--TTGATTTTGTCTGATATTTTTGTT----ATGGTTATGGGCTCATATTCGTTATGTACCAGTA--TAATAATATTAGTTATTTGTTAATCCCACTAATAA------AGTTCTAATTTTATTAATTCGATTCTAATTTTCGAATTTT-------TTAGTTTTTTTAATAT--AAAATA-AAAGAAAAGAGAAAGTTGTAA---TTTTATGCCTCTTAGAT-CTTCATTTCTATTTTAATCATTTCTATTTTAAATGGTAG-AAATTGAAACCTTTTTATTAAATATTTTATTAAATAGAAATA-AAAAAATTTTTAAATCGTGG-AGGAAGGGGGGGCGGATGTAGCCAAGTGG
>LD08
CTGCTATTGA--GCCCCATCTACAAAT-GGATAA-TTCTGTC-TTAGTGGA-GACG-AGTTTTTGAAAATAACGG-AGAAATACCGACTCTCTTGCAAGAGAGTCGGTATTTCTCCGTTATTTTTTATGTTTT-TCTTTAGTAG---------------TTTTTTATTTCTATCTTTTTTT-TACGAAAAGTAT-TTTTATGCTTTTGCT--TTGATTTTGTCTGATATTTTTGTT----ATGGTTATGGGCTCATATTCGTTATGTACCAGTA--TAATAATATTAGTTATTTGTTAATCCCACTAATAA------AGTTCTAATTTTATTAATTCGATTCTAATTTTCGAATTTT-------TTAGTTTTTTTAATAT--AAAATA-AAAGAAAAGAGAAAGTTGTAA---TTTTATGCCTCTTAGAT-CTTCATTTCTATTTTAATCATTTCTATTTTAAATGGTAG-AAATTGAAACCTTTTTATTAAATATTTTATTAAATAGAAATA-AAAAAATTTTTAAATCGTGG-AGGAAGGGGGGGCGGATGTAGCCAAGTGG
>LD11
CTGCTATTGA--GCCCCATCTACAAAT-GGATAA-TTCTGTC-TTAGTGGA-GACG-AGTTTTTGAAAATAACGG-AGAAATACCGACTCTCTTGCAAGAGAGTCGGTATTTCTCCGTTATTTTTTATGTTTT-TCTTTAGTAG---------------TTTTTTATTTCTATCTTTTTTT-TACGAAAAGTAT-TTTTATGCTTTTGCT--TTGATTTTGTCTGATATTTTTGTT----ATGGTTATGGGCTCATATTCGTTATGTACCAGTA--TAATAATATTAGTTATTTGTTAATCCCACTAATAA------AGTTCTAATTTTATTAATTCGATTCTAATTTTCGAATTTT-------TTAGTTTTTTTAATAT--AAAATA-AAAGAAAAGAGAAAGTTGTAA---TTTTATGCCTCTTAGAT-CTTCATTTCTATTTTAATCATTTCTATTTTAAATGGTAG-AAATTGAAACCTTTTTATTAAATATTTTATTAAATAGAAATA-AAAAAATTTTTAAATCGTGG-AGGAAGGGGGGGCGGATGTAGCCAAGTGG

H7
>XY03
CTGCTATTGA--GCCCCATCTACAAAT-GGATAA-TTCTGTC-TTAGTGGA-GACG-AGTTTTTGAAAATAACGG-AGAAATACCGACTCTCTTGCAAGAGAGTCGGTATTTCTCCGTTATTTTTTATGTTTT-TCTTTAGTAG---------------TTTTTTATTTCTATCTTTTTTT-TACGGGCAGTAT-TTTTATGCTTTTGCT--TTGATTTTGTCTGATATTTTTGTT----ATGGTTATGGGCTCATATTCGTTATGTACCAGTA--TAATAATATTAGTTATTTGTTAATCCCACTAATAA------AGTTCTAATTTTATTAATTCGATTCTAATTTTCGAATTTT-------TTAGTTTTTTTAATAT--AAAATA-AAAGAAAAGAGAAAGTTGTAA---TTTTATGCCTCTTAGAT-CTTCATTTCTATTTTAATCATTTCTATTTTAAATGGTAG-AAATTGAAACCTTTTTATTAAATATTTTATTAAATAGAAATA-AAAAAATTTTTAAATCGTGG-AGGAAGGGGGGGCGGATGTAGCCAAGTGG
>XL02
CTGCTATTGA--GCCCCATCTACAAAT-GGATAA-TTCTGTC-TTAGTGGA-GACG-AGTTTTTGAAAATAACGG-AGAAATACCGACTCTCTTGCAAGAGAGTCGGTATTTCTCCGTTATTTTTTATGTTTT-TCTTTAGTAG---------------TTTTTTATTTCTATCTTTTTTT-TACGGGCAGTAT-TTTTATGCTTTTGCT--TTGATTTTGTCTGATATTTTTGTT----ATGGTTATGGGCTCATATTCGTTATGTACCAGTA--TAATAATATTAGTTATTTGTTAATCCCACTAATAA------AGTTCTAATTTTATTAATTCGATTCTAATTTTCGAATTTT-------TTAGTTTTTTTAATAT--AAAATA-AAAGAAAAGAGAAAGTTGTAA---TTTTATGCCTCTTAGAT-CTTCATTTCTATTTTAATCATTTCTATTTTAAATGGTAG-AAATTGAAACCTTTTTATTAAATATTTTATTAAATAGAAATA-AAAAAATTTTTAAATCGTGG-AGGAAGGGGGGGCGGATGTAGCCAAGTGG
>XL14
CTGCTATTGA--GCCCCATCTACAAAT-GGATAA-TTCTGTC-TTAGTGGA-GACG-AGTTTTTGAAAATAACGG-AGAAATACCGACTCTCTTGCAAGAGAGTCGGTATTTCTCCGTTATTTTTTATGTTTT-TCTTTAGTAG---------------TTTTTTATTTCTATCTTTTTTT-TACGGGCAGTAT-TTTTATGCTTTTGCT--TTGATTTTGTCTGATATTTTTGTT----ATGGTTATGGGCTCATATTCGTTATGTACCAGTA--TAATAATATTAGTTATTTGTTAATCCCACTAATAA------AGTTCTAATTTTATTAATTCGATTCTAATTTTCGAATTTT-------TTAGTTTTTTTAATAT--AAAATA-AAAGAAAAGAGAAAGTTGTAA---TTTTATGCCTCTTAGAT-CTTCATTTCTATTTTAATCATTTCTATTTTAAATGGTAG-AAATTGAAACCTTTTTATTAAATATTTTATTAAATAGAAATA-AAAAAATTTTTAAATCGTGG-AGGAAGGGGGGGCGGATGTAGCCAAGTGG
>XL18
CTGCTATTGA--GCCCCATCTACAAAT-GGATAA-TTCTGTC-TTAGTGGA-GACG-AGTTTTTGAAAATAACGG-AGAAATACCGACTCTCTTGCAAGAGAGTCGGTATTTCTCCGTTATTTTTTATGTTTT-TCTTTAGTAG---------------TTTTTTATTTCTATCTTTTTTT-TACGGGCAGTAT-TTTTATGCTTTTGCT--TTGATTTTGTCTGATATTTTTGTT----ATGGTTATGGGCTCATATTCGTTATGTACCAGTA--TAATAATATTAGTTATTTGTTAATCCCACTAATAA------AGTTCTAATTTTATTAATTCGATTCTAATTTTCGAATTTT-------TTAGTTTTTTTAATAT--AAAATA-AAAGAAAAGAGAAAGTTGTAA---TTTTATGCCTCTTAGAT-CTTCATTTCTATTTTAATCATTTCTATTTTAAATGGTAG-AAATTGAAACCTTTTTATTAAATATTTTATTAAATAGAAATA-AAAAAATTTTTAAATCGTGG-AGGAAGGGGGGGCGGATGTAGCCAAGTGG
>LD02
CTGCTATTGA--GCCCCATCTACAAAT-GGATAA-TTCTGTC-TTAGTGGA-GACG-AGTTTTTGAAAATAACGG-AGAAATACCGACTCTCTTGCAAGAGAGTCGGTATTTCTCCGTTATTTTTTATGTTTT-TCTTTAGTAG---------------TTTTTTATTTCTATCTTTTTTT-TACGGGCAGTAT-TTTTATGCTTTTGCT--TTGATTTTGTCTGATATTTTTGTT----ATGGTTATGGGCTCATATTCGTTATGTACCAGTA--TAATAATATTAGTTATTTGTTAATCCCACTAATAA------AGTTCTAATTTTATTAATTCGATTCTAATTTTCGAATTTT-------TTAGTTTTTTTAATAT--AAAATA-AAAGAAAAGAGAAAGTTGTAA---TTTTATGCCTCTTAGAT-CTTCATTTCTATTTTAATCATTTCTATTTTAAATGGTAG-AAATTGAAACCTTTTTATTAAATATTTTATTAAATAGAAATA-AAAAAATTTTTAAATCGTGG-AGGAAGGGGGGGCGGATGTAGCCAAGTGG

H8
>XY10
CTGCTATTGA--GCCCCATCTACAAAT-GGATAA-TTCTGTC-TTAGTGGA-GACG-AGTTTTTGAAAATAACGG-AGAAATACCGACTCTCTTGCAAGAGAGTCGGTATTTCTCCGTTATTTTTTATGTTTT-TCTTTAGTAG---------------TTTTTTATTTCTATCTTTTTTT-TG-GGGCAGTAT-TTTTATGCTTTTGCT--TTGATTTTGTCTGATATTTTTGTT----ATGGTTATGGGCTCATATTCGTTATGTACCAGTA--TAATAATATTAGTTATTTGTTAATCCCACTAATAA------AGTTCTAATTTTATTAATTCGATTCTAATTTTCGAATTTT-------TTAGTTTTTTTAATAT--AAAATA-AAAGAAAAGAGAAAGTTGTAA---TTTTATGCCTCTTAGAT-CTTCATTTCTATTTTAATCATTTCTATTTTAAATGGTAG-AAATTGAAACCTTTTTATTAAATATTTTATTAAATAGAAATA-AAAAAATTTTTAAATCGTGG-AGGAAGGGGGGGCGGATGTAGCCAAGTGG
>CH02
CTGCTATTGA--GCCCCATCTACAAAT-GGATAA-TTCTGTC-TTAGTGGA-GACG-AGTTTTTGAAAATAACGG-AGAAATACCGACTCTCTTGCAAGAGAGTCGGTATTTCTCCGTTATTTTTTATGTTTT-TCTTTAGTAG---------------TTTTTTATTTCTATCTTTTTTT-TG-GGGCAGTAT-TTTTATGCTTTTGCT--TTGATTTTGTCTGATATTTTTGTT----ATGGTTATGGGCTCATATTCGTTATGTACCAGTA--TAATAATATTAGTTATTTGTTAATCCCACTAATAA------AGTTCTAATTTTATTAATTCGATTCTAATTTTCGAATTTT-------TTAGTTTTTTTAATAT--AAAATA-AAAGAAAAGAGAAAGTTGTAA---TTTTATGCCTCTTAGAT-CTTCATTTCTATTTTAATCATTTCTATTTTAAATGGTAG-AAATTGAAACCTTTTTATTAAATATTTTATTAAATAGAAATA-AAAAAATTTTTAAATCGTGG-AGGAAGGGGGGGCGGATGTAGCCAAGTGG

H9
>SM02
CTGCTATTGAA-GCCCCATCTACAAAT-GGATAA-TTCTGTC-TTAGTGGA-GACG-AGTTTTTGAAAATAACGG-AGAAATACCGACTCTCTTGCAAGAGAGTCGGTATTTCTCCGTTATTTTTTATGTTTT-TCTTTAGTAG---------------TTTTTTATTTCTATCTTTTTTT-TACGAAAAGTAT-TTTTATGCTTTTGCT--TTGATTTTGTCTGATATTTTTGTT----ATGGTTATGGGCTCATATTCGTTATGTACCAGTA--TAATAATATTAGTTATTTGTTAATCCCACTAATAA------AGTTCTAATTTTATTAATTCGATTCTAATTTTCGAATTTT-------TTAGTTTTTTTAATAT--AAAATA-AAAGAAAAGAGAAAGTTGTAA---TTTTATGCCTCTTAGAT-CTTCATTTCTAT---------------TTTAAATGGTAG-AAATTGAAACCTTTTTATTAAATATTTTATTAAATAGAAATA-AAAAAAATTTTAAATCGTGG-AGGAAGGGGGGGCGGATGTAGCCAAGTGG
>SM03
CTGCTATTGAA-GCCCCATCTACAAAT-GGATAA-TTCTGTC-TTAGTGGA-GACG-AGTTTTTGAAAATAACGG-AGAAATACCGACTCTCTTGCAAGAGAGTCGGTATTTCTCCGTTATTTTTTATGTTTT-TCTTTAGTAG---------------TTTTTTATTTCTATCTTTTTTT-TACGAAAAGTAT-TTTTATGCTTTTGCT--TTGATTTTGTCTGATATTTTTGTT----ATGGTTATGGGCTCATATTCGTTATGTACCAGTA--TAATAATATTAGTTATTTGTTAATCCCACTAATAA------AGTTCTAATTTTATTAATTCGATTCTAATTTTCGAATTTT-------TTAGTTTTTTTAATAT--AAAATA-AAAGAAAAGAGAAAGTTGTAA---TTTTATGCCTCTTAGAT-CTTCATTTCTAT---------------TTTAAATGGTAG-AAATTGAAACCTTTTTATTAAATATTTTATTAAATAGAAATA-AAAAAAATTTTAAATCGTGG-AGGAAGGGGGGGCGGATGTAGCCAAGTGG
>SM04
CTGCTATTGAA-GCCCCATCTACAAAT-GGATAA-TTCTGTC-TTAGTGGA-GACG-AGTTTTTGAAAATAACGG-AGAAATACCGACTCTCTTGCAAGAGAGTCGGTATTTCTCCGTTATTTTTTATGTTTT-TCTTTAGTAG---------------TTTTTTATTTCTATCTTTTTTT-TACGAAAAGTAT-TTTTATGCTTTTGCT--TTGATTTTGTCTGATATTTTTGTT----ATGGTTATGGGCTCATATTCGTTATGTACCAGTA--TAATAATATTAGTTATTTGTTAATCCCACTAATAA------AGTTCTAATTTTATTAATTCGATTCTAATTTTCGAATTTT-------TTAGTTTTTTTAATAT--AAAATA-AAAGAAAAGAGAAAGTTGTAA---TTTTATGCCTCTTAGAT-CTTCATTTCTAT---------------TTTAAATGGTAG-AAATTGAAACCTTTTTATTAAATATTTTATTAAATAGAAATA-AAAAAAATTTTAAATCGTGG-AGGAAGGGGGGGCGGATGTAGCCAAGTGG
>SM05
CTGCTATTGAA-GCCCCATCTACAAAT-GGATAA-TTCTGTC-TTAGTGGA-GACG-AGTTTTTGAAAATAACGG-AGAAATACCGACTCTCTTGCAAGAGAGTCGGTATTTCTCCGTTATTTTTTATGTTTT-TCTTTAGTAG---------------TTTTTTATTTCTATCTTTTTTT-TACGAAAAGTAT-TTTTATGCTTTTGCT--TTGATTTTGTCTGATATTTTTGTT----ATGGTTATGGGCTCATATTCGTTATGTACCAGTA--TAATAATATTAGTTATTTGTTAATCCCACTAATAA------AGTTCTAATTTTATTAATTCGATTCTAATTTTCGAATTTT-------TTAGTTTTTTTAATAT--AAAATA-AAAGAAAAGAGAAAGTTGTAA---TTTTATGCCTCTTAGAT-CTTCATTTCTAT---------------TTTAAATGGTAG-AAATTGAAACCTTTTTATTAAATATTTTATTAAATAGAAATA-AAAAAAATTTTAAATCGTGG-AGGAAGGGGGGGCGGATGTAGCCAAGTGG
>SM06
CTGCTATTGAA-GCCCCATCTACAAAT-GGATAA-TTCTGTC-TTAGTGGA-GACG-AGTTTTTGAAAATAACGG-AGAAATACCGACTCTCTTGCAAGAGAGTCGGTATTTCTCCGTTATTTTTTATGTTTT-TCTTTAGTAG---------------TTTTTTATTTCTATCTTTTTTT-TACGAAAAGTAT-TTTTATGCTTTTGCT--TTGATTTTGTCTGATATTTTTGTT----ATGGTTATGGGCTCATATTCGTTATGTACCAGTA--TAATAATATTAGTTATTTGTTAATCCCACTAATAA------AGTTCTAATTTTATTAATTCGATTCTAATTTTCGAATTTT-------TTAGTTTTTTTAATAT--AAAATA-AAAGAAAAGAGAAAGTTGTAA---TTTTATGCCTCTTAGAT-CTTCATTTCTAT---------------TTTAAATGGTAG-AAATTGAAACCTTTTTATTAAATATTTTATTAAATAGAAATA-AAAAAAATTTTAAATCGTGG-AGGAAGGGGGGGCGGATGTAGCCAAGTGG
>SM08
CTGCTATTGAA-GCCCCATCTACAAAT-GGATAA-TTCTGTC-TTAGTGGA-GACG-AGTTTTTGAAAATAACGG-AGAAATACCGACTCTCTTGCAAGAGAGTCGGTATTTCTCCGTTATTTTTTATGTTTT-TCTTTAGTAG---------------TTTTTTATTTCTATCTTTTTTT-TACGAAAAGTAT-TTTTATGCTTTTGCT--TTGATTTTGTCTGATATTTTTGTT----ATGGTTATGGGCTCATATTCGTTATGTACCAGTA--TAATAATATTAGTTATTTGTTAATCCCACTAATAA------AGTTCTAATTTTATTAATTCGATTCTAATTTTCGAATTTT-------TTAGTTTTTTTAATAT--AAAATA-AAAGAAAAGAGAAAGTTGTAA---TTTTATGCCTCTTAGAT-CTTCATTTCTAT---------------TTTAAATGGTAG-AAATTGAAACCTTTTTATTAAATATTTTATTAAATAGAAATA-AAAAAAATTTTAAATCGTGG-AGGAAGGGGGGGCGGATGTAGCCAAGTGG
>SM09
CTGCTATTGAA-GCCCCATCTACAAAT-GGATAA-TTCTGTC-TTAGTGGA-GACG-AGTTTTTGAAAATAACGG-AGAAATACCGACTCTCTTGCAAGAGAGTCGGTATTTCTCCGTTATTTTTTATGTTTT-TCTTTAGTAG---------------TTTTTTATTTCTATCTTTTTTT-TACGAAAAGTAT-TTTTATGCTTTTGCT--TTGATTTTGTCTGATATTTTTGTT----ATGGTTATGGGCTCATATTCGTTATGTACCAGTA--TAATAATATTAGTTATTTGTTAATCCCACTAATAA------AGTTCTAATTTTATTAATTCGATTCTAATTTTCGAATTTT-------TTAGTTTTTTTAATAT--AAAATA-AAAGAAAAGAGAAAGTTGTAA---TTTTATGCCTCTTAGAT-CTTCATTTCTAT---------------TTTAAATGGTAG-AAATTGAAACCTTTTTATTAAATATTTTATTAAATAGAAATA-AAAAAAATTTTAAATCGTGG-AGGAAGGGGGGGCGGATGTAGCCAAGTGG
>SM10
CTGCTATTGAA-GCCCCATCTACAAAT-GGATAA-TTCTGTC-TTAGTGGA-GACG-AGTTTTTGAAAATAACGG-AGAAATACCGACTCTCTTGCAAGAGAGTCGGTATTTCTCCGTTATTTTTTATGTTTT-TCTTTAGTAG---------------TTTTTTATTTCTATCTTTTTTT-TACGAAAAGTAT-TTTTATGCTTTTGCT--TTGATTTTGTCTGATATTTTTGTT----ATGGTTATGGGCTCATATTCGTTATGTACCAGTA--TAATAATATTAGTTATTTGTTAATCCCACTAATAA------AGTTCTAATTTTATTAATTCGATTCTAATTTTCGAATTTT-------TTAGTTTTTTTAATAT--AAAATA-AAAGAAAAGAGAAAGTTGTAA---TTTTATGCCTCTTAGAT-CTTCATTTCTAT---------------TTTAAATGGTAG-AAATTGAAACCTTTTTATTAAATATTTTATTAAATAGAAATA-AAAAAAATTTTAAATCGTGG-AGGAAGGGGGGGCGGATGTAGCCAAGTGG
>SM11
CTGCTATTGAA-GCCCCATCTACAAAT-GGATAA-TTCTGTC-TTAGTGGA-GACG-AGTTTTTGAAAATAACGG-AGAAATACCGACTCTCTTGCAAGAGAGTCGGTATTTCTCCGTTATTTTTTATGTTTT-TCTTTAGTAG---------------TTTTTTATTTCTATCTTTTTTT-TACGAAAAGTAT-TTTTATGCTTTTGCT--TTGATTTTGTCTGATATTTTTGTT----ATGGTTATGGGCTCATATTCGTTATGTACCAGTA--TAATAATATTAGTTATTTGTTAATCCCACTAATAA------AGTTCTAATTTTATTAATTCGATTCTAATTTTCGAATTTT-------TTAGTTTTTTTAATAT--AAAATA-AAAGAAAAGAGAAAGTTGTAA---TTTTATGCCTCTTAGAT-CTTCATTTCTAT---------------TTTAAATGGTAG-AAATTGAAACCTTTTTATTAAATATTTTATTAAATAGAAATA-AAAAAAATTTTAAATCGTGG-AGGAAGGGGGGGCGGATGTAGCCAAGTGG
>YR01
CTGCTATTGAA-GCCCCATCTACAAAT-GGATAA-TTCTGTC-TTAGTGGA-GACG-AGTTTTTGAAAATAACGG-AGAAATACCGACTCTCTTGCAAGAGAGTCGGTATTTCTCCGTTATTTTTTATGTTTT-TCTTTAGTAG---------------TTTTTTATTTCTATCTTTTTTT-TACGAAAAGTAT-TTTTATGCTTTTGCT--TTGATTTTGTCTGATATTTTTGTT----ATGGTTATGGGCTCATATTCGTTATGTACCAGTA--TAATAATATTAGTTATTTGTTAATCCCACTAATAA------AGTTCTAATTTTATTAATTCGATTCTAATTTTCGAATTTT-------TTAGTTTTTTTAATAT--AAAATA-AAAGAAAAGAGAAAGTTGTAA---TTTTATGCCTCTTAGAT-CTTCATTTCTAT---------------TTTAAATGGTAG-AAATTGAAACCTTTTTATTAAATATTTTATTAAATAGAAATA-AAAAAAATTTTAAATCGTGG-AGGAAGGGGGGGCGGATGTAGCCAAGTGG
>PW20
CTGCTATTGAA-GCCCCATCTACAAAT-GGATAA-TTCTGTC-TTAGTGGA-GACG-AGTTTTTGAAAATAACGG-AGAAATACCGACTCTCTTGCAAGAGAGTCGGTATTTCTCCGTTATTTTTTATGTTTT-TCTTTAGTAG---------------TTTTTTATTTCTATCTTTTTTT-TACGAAAAGTAT-TTTTATGCTTTTGCT--TTGATTTTGTCTGATATTTTTGTT----ATGGTTATGGGCTCATATTCGTTATGTACCAGTA--TAATAATATTAGTTATTTGTTAATCCCACTAATAA------AGTTCTAATTTTATTAATTCGATTCTAATTTTCGAATTTT-------TTAGTTTTTTTAATAT--AAAATA-AAAGAAAAGAGAAAGTTGTAA---TTTTATGCCTCTTAGAT-CTTCATTTCTAT---------------TTTAAATGGTAG-AAATTGAAACCTTTTTATTAAATATTTTATTAAATAGAAATA-AAAAAAATTTTAAATCGTGG-AGGAAGGGGGGGCGGATGTAGCCAAGTGG
>YF01
CTGCTATTGAA-GCCCCATCTACAAAT-GGATAA-TTCTGTC-TTAGTGGA-GACG-AGTTTTTGAAAATAACGG-AGAAATACCGACTCTCTTGCAAGAGAGTCGGTATTTCTCCGTTATTTTTTATGTTTT-TCTTTAGTAG---------------TTTTTTATTTCTATCTTTTTTT-TACGAAAAGTAT-TTTTATGCTTTTGCT--TTGATTTTGTCTGATATTTTTGTT----ATGGTTATGGGCTCATATTCGTTATGTACCAGTA--TAATAATATTAGTTATTTGTTAATCCCACTAATAA------AGTTCTAATTTTATTAATTCGATTCTAATTTTCGAATTTT-------TTAGTTTTTTTAATAT--AAAATA-AAAGAAAAGAGAAAGTTGTAA---TTTTATGCCTCTTAGAT-CTTCATTTCTAT---------------TTTAAATGGTAG-AAATTGAAACCTTTTTATTAAATATTTTATTAAATAGAAATA-AAAAAAATTTTAAATCGTGG-AGGAAGGGGGGGCGGATGTAGCCAAGTGG
>YF02
CTGCTATTGAA-GCCCCATCTACAAAT-GGATAA-TTCTGTC-TTAGTGGA-GACG-AGTTTTTGAAAATAACGG-AGAAATACCGACTCTCTTGCAAGAGAGTCGGTATTTCTCCGTTATTTTTTATGTTTT-TCTTTAGTAG---------------TTTTTTATTTCTATCTTTTTTT-TACGAAAAGTAT-TTTTATGCTTTTGCT--TTGATTTTGTCTGATATTTTTGTT----ATGGTTATGGGCTCATATTCGTTATGTACCAGTA--TAATAATATTAGTTATTTGTTAATCCCACTAATAA------AGTTCTAATTTTATTAATTCGATTCTAATTTTCGAATTTT-------TTAGTTTTTTTAATAT--AAAATA-AAAGAAAAGAGAAAGTTGTAA---TTTTATGCCTCTTAGAT-CTTCATTTCTAT---------------TTTAAATGGTAG-AAATTGAAACCTTTTTATTAAATATTTTATTAAATAGAAATA-AAAAAAATTTTAAATCGTGG-AGGAAGGGGGGGCGGATGTAGCCAAGTGG
>YF03
CTGCTATTGAA-GCCCCATCTACAAAT-GGATAA-TTCTGTC-TTAGTGGA-GACG-AGTTTTTGAAAATAACGG-AGAAATACCGACTCTCTTGCAAGAGAGTCGGTATTTCTCCGTTATTTTTTATGTTTT-TCTTTAGTAG---------------TTTTTTATTTCTATCTTTTTTT-TACGAAAAGTAT-TTTTATGCTTTTGCT--TTGATTTTGTCTGATATTTTTGTT----ATGGTTATGGGCTCATATTCGTTATGTACCAGTA--TAATAATATTAGTTATTTGTTAATCCCACTAATAA------AGTTCTAATTTTATTAATTCGATTCTAATTTTCGAATTTT-------TTAGTTTTTTTAATAT--AAAATA-AAAGAAAAGAGAAAGTTGTAA---TTTTATGCCTCTTAGAT-CTTCATTTCTAT---------------TTTAAATGGTAG-AAATTGAAACCTTTTTATTAAATATTTTATTAAATAGAAATA-AAAAAAATTTTAAATCGTGG-AGGAAGGGGGGGCGGATGTAGCCAAGTGG
>YF04
CTGCTATTGAA-GCCCCATCTACAAAT-GGATAA-TTCTGTC-TTAGTGGA-GACG-AGTTTTTGAAAATAACGG-AGAAATACCGACTCTCTTGCAAGAGAGTCGGTATTTCTCCGTTATTTTTTATGTTTT-TCTTTAGTAG---------------TTTTTTATTTCTATCTTTTTTT-TACGAAAAGTAT-TTTTATGCTTTTGCT--TTGATTTTGTCTGATATTTTTGTT----ATGGTTATGGGCTCATATTCGTTATGTACCAGTA--TAATAATATTAGTTATTTGTTAATCCCACTAATAA------AGTTCTAATTTTATTAATTCGATTCTAATTTTCGAATTTT-------TTAGTTTTTTTAATAT--AAAATA-AAAGAAAAGAGAAAGTTGTAA---TTTTATGCCTCTTAGAT-CTTCATTTCTAT---------------TTTAAATGGTAG-AAATTGAAACCTTTTTATTAAATATTTTATTAAATAGAAATA-AAAAAAATTTTAAATCGTGG-AGGAAGGGGGGGCGGATGTAGCCAAGTGG
>YF05
CTGCTATTGAA-GCCCCATCTACAAAT-GGATAA-TTCTGTC-TTAGTGGA-GACG-AGTTTTTGAAAATAACGG-AGAAATACCGACTCTCTTGCAAGAGAGTCGGTATTTCTCCGTTATTTTTTATGTTTT-TCTTTAGTAG---------------TTTTTTATTTCTATCTTTTTTT-TACGAAAAGTAT-TTTTATGCTTTTGCT--TTGATTTTGTCTGATATTTTTGTT----ATGGTTATGGGCTCATATTCGTTATGTACCAGTA--TAATAATATTAGTTATTTGTTAATCCCACTAATAA------AGTTCTAATTTTATTAATTCGATTCTAATTTTCGAATTTT-------TTAGTTTTTTTAATAT--AAAATA-AAAGAAAAGAGAAAGTTGTAA---TTTTATGCCTCTTAGAT-CTTCATTTCTAT---------------TTTAAATGGTAG-AAATTGAAACCTTTTTATTAAATATTTTATTAAATAGAAATA-AAAAAAATTTTAAATCGTGG-AGGAAGGGGGGGCGGATGTAGCCAAGTGG
>YF06
CTGCTATTGAA-GCCCCATCTACAAAT-GGATAA-TTCTGTC-TTAGTGGA-GACG-AGTTTTTGAAAATAACGG-AGAAATACCGACTCTCTTGCAAGAGAGTCGGTATTTCTCCGTTATTTTTTATGTTTT-TCTTTAGTAG---------------TTTTTTATTTCTATCTTTTTTT-TACGAAAAGTAT-TTTTATGCTTTTGCT--TTGATTTTGTCTGATATTTTTGTT----ATGGTTATGGGCTCATATTCGTTATGTACCAGTA--TAATAATATTAGTTATTTGTTAATCCCACTAATAA------AGTTCTAATTTTATTAATTCGATTCTAATTTTCGAATTTT-------TTAGTTTTTTTAATAT--AAAATA-AAAGAAAAGAGAAAGTTGTAA---TTTTATGCCTCTTAGAT-CTTCATTTCTAT---------------TTTAAATGGTAG-AAATTGAAACCTTTTTATTAAATATTTTATTAAATAGAAATA-AAAAAAATTTTAAATCGTGG-AGGAAGGGGGGGCGGATGTAGCCAAGTGG
>YF07
CTGCTATTGAA-GCCCCATCTACAAAT-GGATAA-TTCTGTC-TTAGTGGA-GACG-AGTTTTTGAAAATAACGG-AGAAATACCGACTCTCTTGCAAGAGAGTCGGTATTTCTCCGTTATTTTTTATGTTTT-TCTTTAGTAG---------------TTTTTTATTTCTATCTTTTTTT-TACGAAAAGTAT-TTTTATGCTTTTGCT--TTGATTTTGTCTGATATTTTTGTT----ATGGTTATGGGCTCATATTCGTTATGTACCAGTA--TAATAATATTAGTTATTTGTTAATCCCACTAATAA------AGTTCTAATTTTATTAATTCGATTCTAATTTTCGAATTTT-------TTAGTTTTTTTAATAT--AAAATA-AAAGAAAAGAGAAAGTTGTAA---TTTTATGCCTCTTAGAT-CTTCATTTCTAT---------------TTTAAATGGTAG-AAATTGAAACCTTTTTATTAAATATTTTATTAAATAGAAATA-AAAAAAATTTTAAATCGTGG-AGGAAGGGGGGGCGGATGTAGCCAAGTGG
>YF08
CTGCTATTGAA-GCCCCATCTACAAAT-GGATAA-TTCTGTC-TTAGTGGA-GACG-AGTTTTTGAAAATAACGG-AGAAATACCGACTCTCTTGCAAGAGAGTCGGTATTTCTCCGTTATTTTTTATGTTTT-TCTTTAGTAG---------------TTTTTTATTTCTATCTTTTTTT-TACGAAAAGTAT-TTTTATGCTTTTGCT--TTGATTTTGTCTGATATTTTTGTT----ATGGTTATGGGCTCATATTCGTTATGTACCAGTA--TAATAATATTAGTTATTTGTTAATCCCACTAATAA------AGTTCTAATTTTATTAATTCGATTCTAATTTTCGAATTTT-------TTAGTTTTTTTAATAT--AAAATA-AAAGAAAAGAGAAAGTTGTAA---TTTTATGCCTCTTAGAT-CTTCATTTCTAT---------------TTTAAATGGTAG-AAATTGAAACCTTTTTATTAAATATTTTATTAAATAGAAATA-AAAAAAATTTTAAATCGTGG-AGGAAGGGGGGGCGGATGTAGCCAAGTGG
>YF09
CTGCTATTGAA-GCCCCATCTACAAAT-GGATAA-TTCTGTC-TTAGTGGA-GACG-AGTTTTTGAAAATAACGG-AGAAATACCGACTCTCTTGCAAGAGAGTCGGTATTTCTCCGTTATTTTTTATGTTTT-TCTTTAGTAG---------------TTTTTTATTTCTATCTTTTTTT-TACGAAAAGTAT-TTTTATGCTTTTGCT--TTGATTTTGTCTGATATTTTTGTT----ATGGTTATGGGCTCATATTCGTTATGTACCAGTA--TAATAATATTAGTTATTTGTTAATCCCACTAATAA------AGTTCTAATTTTATTAATTCGATTCTAATTTTCGAATTTT-------TTAGTTTTTTTAATAT--AAAATA-AAAGAAAAGAGAAAGTTGTAA---TTTTATGCCTCTTAGAT-CTTCATTTCTAT---------------TTTAAATGGTAG-AAATTGAAACCTTTTTATTAAATATTTTATTAAATAGAAATA-AAAAAAATTTTAAATCGTGG-AGGAAGGGGGGGCGGATGTAGCCAAGTGG
>YF10
CTGCTATTGAA-GCCCCATCTACAAAT-GGATAA-TTCTGTC-TTAGTGGA-GACG-AGTTTTTGAAAATAACGG-AGAAATACCGACTCTCTTGCAAGAGAGTCGGTATTTCTCCGTTATTTTTTATGTTTT-TCTTTAGTAG---------------TTTTTTATTTCTATCTTTTTTT-TACGAAAAGTAT-TTTTATGCTTTTGCT--TTGATTTTGTCTGATATTTTTGTT----ATGGTTATGGGCTCATATTCGTTATGTACCAGTA--TAATAATATTAGTTATTTGTTAATCCCACTAATAA------AGTTCTAATTTTATTAATTCGATTCTAATTTTCGAATTTT-------TTAGTTTTTTTAATAT--AAAATA-AAAGAAAAGAGAAAGTTGTAA---TTTTATGCCTCTTAGAT-CTTCATTTCTAT---------------TTTAAATGGTAG-AAATTGAAACCTTTTTATTAAATATTTTATTAAATAGAAATA-AAAAAAATTTTAAATCGTGG-AGGAAGGGGGGGCGGATGTAGCCAAGTGG
>YF11
CTGCTATTGAA-GCCCCATCTACAAAT-GGATAA-TTCTGTC-TTAGTGGA-GACG-AGTTTTTGAAAATAACGG-AGAAATACCGACTCTCTTGCAAGAGAGTCGGTATTTCTCCGTTATTTTTTATGTTTT-TCTTTAGTAG---------------TTTTTTATTTCTATCTTTTTTT-TACGAAAAGTAT-TTTTATGCTTTTGCT--TTGATTTTGTCTGATATTTTTGTT----ATGGTTATGGGCTCATATTCGTTATGTACCAGTA--TAATAATATTAGTTATTTGTTAATCCCACTAATAA------AGTTCTAATTTTATTAATTCGATTCTAATTTTCGAATTTT-------TTAGTTTTTTTAATAT--AAAATA-AAAGAAAAGAGAAAGTTGTAA---TTTTATGCCTCTTAGAT-CTTCATTTCTAT---------------TTTAAATGGTAG-AAATTGAAACCTTTTTATTAAATATTTTATTAAATAGAAATA-AAAAAAATTTTAAATCGTGG-AGGAAGGGGGGGCGGATGTAGCCAAGTGG
>YF12
CTGCTATTGAA-GCCCCATCTACAAAT-GGATAA-TTCTGTC-TTAGTGGA-GACG-AGTTTTTGAAAATAACGG-AGAAATACCGACTCTCTTGCAAGAGAGTCGGTATTTCTCCGTTATTTTTTATGTTTT-TCTTTAGTAG---------------TTTTTTATTTCTATCTTTTTTT-TACGAAAAGTAT-TTTTATGCTTTTGCT--TTGATTTTGTCTGATATTTTTGTT----ATGGTTATGGGCTCATATTCGTTATGTACCAGTA--TAATAATATTAGTTATTTGTTAATCCCACTAATAA------AGTTCTAATTTTATTAATTCGATTCTAATTTTCGAATTTT-------TTAGTTTTTTTAATAT--AAAATA-AAAGAAAAGAGAAAGTTGTAA---TTTTATGCCTCTTAGAT-CTTCATTTCTAT---------------TTTAAATGGTAG-AAATTGAAACCTTTTTATTAAATATTTTATTAAATAGAAATA-AAAAAAATTTTAAATCGTGG-AGGAAGGGGGGGCGGATGTAGCCAAGTGG
>YF13
CTGCTATTGAA-GCCCCATCTACAAAT-GGATAA-TTCTGTC-TTAGTGGA-GACG-AGTTTTTGAAAATAACGG-AGAAATACCGACTCTCTTGCAAGAGAGTCGGTATTTCTCCGTTATTTTTTATGTTTT-TCTTTAGTAG---------------TTTTTTATTTCTATCTTTTTTT-TACGAAAAGTAT-TTTTATGCTTTTGCT--TTGATTTTGTCTGATATTTTTGTT----ATGGTTATGGGCTCATATTCGTTATGTACCAGTA--TAATAATATTAGTTATTTGTTAATCCCACTAATAA------AGTTCTAATTTTATTAATTCGATTCTAATTTTCGAATTTT-------TTAGTTTTTTTAATAT--AAAATA-AAAGAAAAGAGAAAGTTGTAA---TTTTATGCCTCTTAGAT-CTTCATTTCTAT---------------TTTAAATGGTAG-AAATTGAAACCTTTTTATTAAATATTTTATTAAATAGAAATA-AAAAAAATTTTAAATCGTGG-AGGAAGGGGGGGCGGATGTAGCCAAGTGG
>YF14
CTGCTATTGAA-GCCCCATCTACAAAT-GGATAA-TTCTGTC-TTAGTGGA-GACG-AGTTTTTGAAAATAACGG-AGAAATACCGACTCTCTTGCAAGAGAGTCGGTATTTCTCCGTTATTTTTTATGTTTT-TCTTTAGTAG---------------TTTTTTATTTCTATCTTTTTTT-TACGAAAAGTAT-TTTTATGCTTTTGCT--TTGATTTTGTCTGATATTTTTGTT----ATGGTTATGGGCTCATATTCGTTATGTACCAGTA--TAATAATATTAGTTATTTGTTAATCCCACTAATAA------AGTTCTAATTTTATTAATTCGATTCTAATTTTCGAATTTT-------TTAGTTTTTTTAATAT--AAAATA-AAAGAAAAGAGAAAGTTGTAA---TTTTATGCCTCTTAGAT-CTTCATTTCTAT---------------TTTAAATGGTAG-AAATTGAAACCTTTTTATTAAATATTTTATTAAATAGAAATA-AAAAAAATTTTAAATCGTGG-AGGAAGGGGGGGCGGATGTAGCCAAGTGG
>YF15
CTGCTATTGAA-GCCCCATCTACAAAT-GGATAA-TTCTGTC-TTAGTGGA-GACG-AGTTTTTGAAAATAACGG-AGAAATACCGACTCTCTTGCAAGAGAGTCGGTATTTCTCCGTTATTTTTTATGTTTT-TCTTTAGTAG---------------TTTTTTATTTCTATCTTTTTTT-TACGAAAAGTAT-TTTTATGCTTTTGCT--TTGATTTTGTCTGATATTTTTGTT----ATGGTTATGGGCTCATATTCGTTATGTACCAGTA--TAATAATATTAGTTATTTGTTAATCCCACTAATAA------AGTTCTAATTTTATTAATTCGATTCTAATTTTCGAATTTT-------TTAGTTTTTTTAATAT--AAAATA-AAAGAAAAGAGAAAGTTGTAA---TTTTATGCCTCTTAGAT-CTTCATTTCTAT---------------TTTAAATGGTAG-AAATTGAAACCTTTTTATTAAATATTTTATTAAATAGAAATA-AAAAAAATTTTAAATCGTGG-AGGAAGGGGGGGCGGATGTAGCCAAGTGG
>YF16
CTGCTATTGAA-GCCCCATCTACAAAT-GGATAA-TTCTGTC-TTAGTGGA-GACG-AGTTTTTGAAAATAACGG-AGAAATACCGACTCTCTTGCAAGAGAGTCGGTATTTCTCCGTTATTTTTTATGTTTT-TCTTTAGTAG---------------TTTTTTATTTCTATCTTTTTTT-TACGAAAAGTAT-TTTTATGCTTTTGCT--TTGATTTTGTCTGATATTTTTGTT----ATGGTTATGGGCTCATATTCGTTATGTACCAGTA--TAATAATATTAGTTATTTGTTAATCCCACTAATAA------AGTTCTAATTTTATTAATTCGATTCTAATTTTCGAATTTT-------TTAGTTTTTTTAATAT--AAAATA-AAAGAAAAGAGAAAGTTGTAA---TTTTATGCCTCTTAGAT-CTTCATTTCTAT---------------TTTAAATGGTAG-AAATTGAAACCTTTTTATTAAATATTTTATTAAATAGAAATA-AAAAAAATTTTAAATCGTGG-AGGAAGGGGGGGCGGATGTAGCCAAGTGG
>YF17
CTGCTATTGAA-GCCCCATCTACAAAT-GGATAA-TTCTGTC-TTAGTGGA-GACG-AGTTTTTGAAAATAACGG-AGAAATACCGACTCTCTTGCAAGAGAGTCGGTATTTCTCCGTTATTTTTTATGTTTT-TCTTTAGTAG---------------TTTTTTATTTCTATCTTTTTTT-TACGAAAAGTAT-TTTTATGCTTTTGCT--TTGATTTTGTCTGATATTTTTGTT----ATGGTTATGGGCTCATATTCGTTATGTACCAGTA--TAATAATATTAGTTATTTGTTAATCCCACTAATAA------AGTTCTAATTTTATTAATTCGATTCTAATTTTCGAATTTT-------TTAGTTTTTTTAATAT--AAAATA-AAAGAAAAGAGAAAGTTGTAA---TTTTATGCCTCTTAGAT-CTTCATTTCTAT---------------TTTAAATGGTAG-AAATTGAAACCTTTTTATTAAATATTTTATTAAATAGAAATA-AAAAAAATTTTAAATCGTGG-AGGAAGGGGGGGCGGATGTAGCCAAGTGG
>YF18
CTGCTATTGAA-GCCCCATCTACAAAT-GGATAA-TTCTGTC-TTAGTGGA-GACG-AGTTTTTGAAAATAACGG-AGAAATACCGACTCTCTTGCAAGAGAGTCGGTATTTCTCCGTTATTTTTTATGTTTT-TCTTTAGTAG---------------TTTTTTATTTCTATCTTTTTTT-TACGAAAAGTAT-TTTTATGCTTTTGCT--TTGATTTTGTCTGATATTTTTGTT----ATGGTTATGGGCTCATATTCGTTATGTACCAGTA--TAATAATATTAGTTATTTGTTAATCCCACTAATAA------AGTTCTAATTTTATTAATTCGATTCTAATTTTCGAATTTT-------TTAGTTTTTTTAATAT--AAAATA-AAAGAAAAGAGAAAGTTGTAA---TTTTATGCCTCTTAGAT-CTTCATTTCTAT---------------TTTAAATGGTAG-AAATTGAAACCTTTTTATTAAATATTTTATTAAATAGAAATA-AAAAAAATTTTAAATCGTGG-AGGAAGGGGGGGCGGATGTAGCCAAGTGG
>LC11
CTGCTATTGAA-GCCCCATCTACAAAT-GGATAA-TTCTGTC-TTAGTGGA-GACG-AGTTTTTGAAAATAACGG-AGAAATACCGACTCTCTTGCAAGAGAGTCGGTATTTCTCCGTTATTTTTTATGTTTT-TCTTTAGTAG---------------TTTTTTATTTCTATCTTTTTTT-TACGAAAAGTAT-TTTTATGCTTTTGCT--TTGATTTTGTCTGATATTTTTGTT----ATGGTTATGGGCTCATATTCGTTATGTACCAGTA--TAATAATATTAGTTATTTGTTAATCCCACTAATAA------AGTTCTAATTTTATTAATTCGATTCTAATTTTCGAATTTT-------TTAGTTTTTTTAATAT--AAAATA-AAAGAAAAGAGAAAGTTGTAA---TTTTATGCCTCTTAGAT-CTTCATTTCTAT---------------TTTAAATGGTAG-AAATTGAAACCTTTTTATTAAATATTTTATTAAATAGAAATA-AAAAAAATTTTAAATCGTGG-AGGAAGGGGGGGCGGATGTAGCCAAGTGG
>LC14
CTGCTATTGAA-GCCCCATCTACAAAT-GGATAA-TTCTGTC-TTAGTGGA-GACG-AGTTTTTGAAAATAACGG-AGAAATACCGACTCTCTTGCAAGAGAGTCGGTATTTCTCCGTTATTTTTTATGTTTT-TCTTTAGTAG---------------TTTTTTATTTCTATCTTTTTTT-TACGAAAAGTAT-TTTTATGCTTTTGCT--TTGATTTTGTCTGATATTTTTGTT----ATGGTTATGGGCTCATATTCGTTATGTACCAGTA--TAATAATATTAGTTATTTGTTAATCCCACTAATAA------AGTTCTAATTTTATTAATTCGATTCTAATTTTCGAATTTT-------TTAGTTTTTTTAATAT--AAAATA-AAAGAAAAGAGAAAGTTGTAA---TTTTATGCCTCTTAGAT-CTTCATTTCTAT---------------TTTAAATGGTAG-AAATTGAAACCTTTTTATTAAATATTTTATTAAATAGAAATA-AAAAAAATTTTAAATCGTGG-AGGAAGGGGGGGCGGATGTAGCCAAGTGG

H10
>SM07
CTGCTATTGA--GCCCCATCTACAAAT-GGATAA-TTCTGTC-TTAGTGGA-GACG-AGTTTTTGAAAATAACGG-AGAAATACCGACTCTCTTGCAAGAGAGTCGGTATTTCTCCGTTATTTTTTATGTTTT-TCTTTAGTAG---------------TTTTTTATTTCTATCTTTTTTT-TACGAAAAGTAT-TTTTATGCTTTTGCT--TTGATTTTGTCTGATATTTTTGTT----ATGGTTATGGGCTCATATTCGTTATGTACCAGTA--TAATAATATTAGTTATTTGTTAATCCCACTAATAA------AGTTCTAATTTTATTAATTCGATTCTAATTTTCGAATTTT-------TTAGTTTTTTTAATAT--AAAATA-AAAGAAAAGAGAAAGTTGTAA---TTTTATGCCTCTTAAAT-CTTCATTTCTAT---------------TTTAAATGGTAG-AAATTGAAACCTTTTTATTAAATATTTTATTAAATAGAAATA-AAAAAAATTTTAAATCGTGG-AGGAAGGGGGGGCGGATGTAGCCAAGTGG
>YR02
CTGCTATTGA--GCCCCATCTACAAAT-GGATAA-TTCTGTC-TTAGTGGA-GACG-AGTTTTTGAAAATAACGG-AGAAATACCGACTCTCTTGCAAGAGAGTCGGTATTTCTCCGTTATTTTTTATGTTTT-TCTTTAGTAG---------------TTTTTTATTTCTATCTTTTTTT-TACGAAAAGTAT-TTTTATGCTTTTGCT--TTGATTTTGTCTGATATTTTTGTT----ATGGTTATGGGCTCATATTCGTTATGTACCAGTA--TAATAATATTAGTTATTTGTTAATCCCACTAATAA------AGTTCTAATTTTATTAATTCGATTCTAATTTTCGAATTTT-------TTAGTTTTTTTAATAT--AAAATA-AAAGAAAAGAGAAAGTTGTAA---TTTTATGCCTCTTAAAT-CTTCATTTCTAT---------------TTTAAATGGTAG-AAATTGAAACCTTTTTATTAAATATTTTATTAAATAGAAATA-AAAAAAATTTTAAATCGTGG-AGGAAGGGGGGGCGGATGTAGCCAAGTGG
>YR22
CTGCTATTGA--GCCCCATCTACAAAT-GGATAA-TTCTGTC-TTAGTGGA-GACG-AGTTTTTGAAAATAACGG-AGAAATACCGACTCTCTTGCAAGAGAGTCGGTATTTCTCCGTTATTTTTTATGTTTT-TCTTTAGTAG---------------TTTTTTATTTCTATCTTTTTTT-TACGAAAAGTAT-TTTTATGCTTTTGCT--TTGATTTTGTCTGATATTTTTGTT----ATGGTTATGGGCTCATATTCGTTATGTACCAGTA--TAATAATATTAGTTATTTGTTAATCCCACTAATAA------AGTTCTAATTTTATTAATTCGATTCTAATTTTCGAATTTT-------TTAGTTTTTTTAATAT--AAAATA-AAAGAAAAGAGAAAGTTGTAA---TTTTATGCCTCTTAAAT-CTTCATTTCTAT---------------TTTAAATGGTAG-AAATTGAAACCTTTTTATTAAATATTTTATTAAATAGAAATA-AAAAAAATTTTAAATCGTGG-AGGAAGGGGGGGCGGATGTAGCCAAGTGG
>YR26
CTGCTATTGA--GCCCCATCTACAAAT-GGATAA-TTCTGTC-TTAGTGGA-GACG-AGTTTTTGAAAATAACGG-AGAAATACCGACTCTCTTGCAAGAGAGTCGGTATTTCTCCGTTATTTTTTATGTTTT-TCTTTAGTAG---------------TTTTTTATTTCTATCTTTTTTT-TACGAAAAGTAT-TTTTATGCTTTTGCT--TTGATTTTGTCTGATATTTTTGTT----ATGGTTATGGGCTCATATTCGTTATGTACCAGTA--TAATAATATTAGTTATTTGTTAATCCCACTAATAA------AGTTCTAATTTTATTAATTCGATTCTAATTTTCGAATTTT-------TTAGTTTTTTTAATAT--AAAATA-AAAGAAAAGAGAAAGTTGTAA---TTTTATGCCTCTTAAAT-CTTCATTTCTAT---------------TTTAAATGGTAG-AAATTGAAACCTTTTTATTAAATATTTTATTAAATAGAAATA-AAAAAAATTTTAAATCGTGG-AGGAAGGGGGGGCGGATGTAGCCAAGTGG
>YR27
CTGCTATTGA--GCCCCATCTACAAAT-GGATAA-TTCTGTC-TTAGTGGA-GACG-AGTTTTTGAAAATAACGG-AGAAATACCGACTCTCTTGCAAGAGAGTCGGTATTTCTCCGTTATTTTTTATGTTTT-TCTTTAGTAG---------------TTTTTTATTTCTATCTTTTTTT-TACGAAAAGTAT-TTTTATGCTTTTGCT--TTGATTTTGTCTGATATTTTTGTT----ATGGTTATGGGCTCATATTCGTTATGTACCAGTA--TAATAATATTAGTTATTTGTTAATCCCACTAATAA------AGTTCTAATTTTATTAATTCGATTCTAATTTTCGAATTTT-------TTAGTTTTTTTAATAT--AAAATA-AAAGAAAAGAGAAAGTTGTAA---TTTTATGCCTCTTAAAT-CTTCATTTCTAT---------------TTTAAATGGTAG-AAATTGAAACCTTTTTATTAAATATTTTATTAAATAGAAATA-AAAAAAATTTTAAATCGTGG-AGGAAGGGGGGGCGGATGTAGCCAAGTGG
>BS01
CTGCTATTGA--GCCCCATCTACAAAT-GGATAA-TTCTGTC-TTAGTGGA-GACG-AGTTTTTGAAAATAACGG-AGAAATACCGACTCTCTTGCAAGAGAGTCGGTATTTCTCCGTTATTTTTTATGTTTT-TCTTTAGTAG---------------TTTTTTATTTCTATCTTTTTTT-TACGAAAAGTAT-TTTTATGCTTTTGCT--TTGATTTTGTCTGATATTTTTGTT----ATGGTTATGGGCTCATATTCGTTATGTACCAGTA--TAATAATATTAGTTATTTGTTAATCCCACTAATAA------AGTTCTAATTTTATTAATTCGATTCTAATTTTCGAATTTT-------TTAGTTTTTTTAATAT--AAAATA-AAAGAAAAGAGAAAGTTGTAA---TTTTATGCCTCTTAAAT-CTTCATTTCTAT---------------TTTAAATGGTAG-AAATTGAAACCTTTTTATTAAATATTTTATTAAATAGAAATA-AAAAAAATTTTAAATCGTGG-AGGAAGGGGGGGCGGATGTAGCCAAGTGG
>BS11
CTGCTATTGA--GCCCCATCTACAAAT-GGATAA-TTCTGTC-TTAGTGGA-GACG-AGTTTTTGAAAATAACGG-AGAAATACCGACTCTCTTGCAAGAGAGTCGGTATTTCTCCGTTATTTTTTATGTTTT-TCTTTAGTAG---------------TTTTTTATTTCTATCTTTTTTT-TACGAAAAGTAT-TTTTATGCTTTTGCT--TTGATTTTGTCTGATATTTTTGTT----ATGGTTATGGGCTCATATTCGTTATGTACCAGTA--TAATAATATTAGTTATTTGTTAATCCCACTAATAA------AGTTCTAATTTTATTAATTCGATTCTAATTTTCGAATTTT-------TTAGTTTTTTTAATAT--AAAATA-AAAGAAAAGAGAAAGTTGTAA---TTTTATGCCTCTTAAAT-CTTCATTTCTAT---------------TTTAAATGGTAG-AAATTGAAACCTTTTTATTAAATATTTTATTAAATAGAAATA-AAAAAAATTTTAAATCGTGG-AGGAAGGGGGGGCGGATGTAGCCAAGTGG
>PW05
CTGCTATTGA--GCCCCATCTACAAAT-GGATAA-TTCTGTC-TTAGTGGA-GACG-AGTTTTTGAAAATAACGG-AGAAATACCGACTCTCTTGCAAGAGAGTCGGTATTTCTCCGTTATTTTTTATGTTTT-TCTTTAGTAG---------------TTTTTTATTTCTATCTTTTTTT-TACGAAAAGTAT-TTTTATGCTTTTGCT--TTGATTTTGTCTGATATTTTTGTT----ATGGTTATGGGCTCATATTCGTTATGTACCAGTA--TAATAATATTAGTTATTTGTTAATCCCACTAATAA------AGTTCTAATTTTATTAATTCGATTCTAATTTTCGAATTTT-------TTAGTTTTTTTAATAT--AAAATA-AAAGAAAAGAGAAAGTTGTAA---TTTTATGCCTCTTAAAT-CTTCATTTCTAT---------------TTTAAATGGTAG-AAATTGAAACCTTTTTATTAAATATTTTATTAAATAGAAATA-AAAAAAATTTTAAATCGTGG-AGGAAGGGGGGGCGGATGTAGCCAAGTGG
>PW07
CTGCTATTGA--GCCCCATCTACAAAT-GGATAA-TTCTGTC-TTAGTGGA-GACG-AGTTTTTGAAAATAACGG-AGAAATACCGACTCTCTTGCAAGAGAGTCGGTATTTCTCCGTTATTTTTTATGTTTT-TCTTTAGTAG---------------TTTTTTATTTCTATCTTTTTTT-TACGAAAAGTAT-TTTTATGCTTTTGCT--TTGATTTTGTCTGATATTTTTGTT----ATGGTTATGGGCTCATATTCGTTATGTACCAGTA--TAATAATATTAGTTATTTGTTAATCCCACTAATAA------AGTTCTAATTTTATTAATTCGATTCTAATTTTCGAATTTT-------TTAGTTTTTTTAATAT--AAAATA-AAAGAAAAGAGAAAGTTGTAA---TTTTATGCCTCTTAAAT-CTTCATTTCTAT---------------TTTAAATGGTAG-AAATTGAAACCTTTTTATTAAATATTTTATTAAATAGAAATA-AAAAAAATTTTAAATCGTGG-AGGAAGGGGGGGCGGATGTAGCCAAGTGG
>PW10
CTGCTATTGA--GCCCCATCTACAAAT-GGATAA-TTCTGTC-TTAGTGGA-GACG-AGTTTTTGAAAATAACGG-AGAAATACCGACTCTCTTGCAAGAGAGTCGGTATTTCTCCGTTATTTTTTATGTTTT-TCTTTAGTAG---------------TTTTTTATTTCTATCTTTTTTT-TACGAAAAGTAT-TTTTATGCTTTTGCT--TTGATTTTGTCTGATATTTTTGTT----ATGGTTATGGGCTCATATTCGTTATGTACCAGTA--TAATAATATTAGTTATTTGTTAATCCCACTAATAA------AGTTCTAATTTTATTAATTCGATTCTAATTTTCGAATTTT-------TTAGTTTTTTTAATAT--AAAATA-AAAGAAAAGAGAAAGTTGTAA---TTTTATGCCTCTTAAAT-CTTCATTTCTAT---------------TTTAAATGGTAG-AAATTGAAACCTTTTTATTAAATATTTTATTAAATAGAAATA-AAAAAAATTTTAAATCGTGG-AGGAAGGGGGGGCGGATGTAGCCAAGTGG
>PW11
CTGCTATTGA--GCCCCATCTACAAAT-GGATAA-TTCTGTC-TTAGTGGA-GACG-AGTTTTTGAAAATAACGG-AGAAATACCGACTCTCTTGCAAGAGAGTCGGTATTTCTCCGTTATTTTTTATGTTTT-TCTTTAGTAG---------------TTTTTTATTTCTATCTTTTTTT-TACGAAAAGTAT-TTTTATGCTTTTGCT--TTGATTTTGTCTGATATTTTTGTT----ATGGTTATGGGCTCATATTCGTTATGTACCAGTA--TAATAATATTAGTTATTTGTTAATCCCACTAATAA------AGTTCTAATTTTATTAATTCGATTCTAATTTTCGAATTTT-------TTAGTTTTTTTAATAT--AAAATA-AAAGAAAAGAGAAAGTTGTAA---TTTTATGCCTCTTAAAT-CTTCATTTCTAT---------------TTTAAATGGTAG-AAATTGAAACCTTTTTATTAAATATTTTATTAAATAGAAATA-AAAAAAATTTTAAATCGTGG-AGGAAGGGGGGGCGGATGTAGCCAAGTGG
>PW17
CTGCTATTGA--GCCCCATCTACAAAT-GGATAA-TTCTGTC-TTAGTGGA-GACG-AGTTTTTGAAAATAACGG-AGAAATACCGACTCTCTTGCAAGAGAGTCGGTATTTCTCCGTTATTTTTTATGTTTT-TCTTTAGTAG---------------TTTTTTATTTCTATCTTTTTTT-TACGAAAAGTAT-TTTTATGCTTTTGCT--TTGATTTTGTCTGATATTTTTGTT----ATGGTTATGGGCTCATATTCGTTATGTACCAGTA--TAATAATATTAGTTATTTGTTAATCCCACTAATAA------AGTTCTAATTTTATTAATTCGATTCTAATTTTCGAATTTT-------TTAGTTTTTTTAATAT--AAAATA-AAAGAAAAGAGAAAGTTGTAA---TTTTATGCCTCTTAAAT-CTTCATTTCTAT---------------TTTAAATGGTAG-AAATTGAAACCTTTTTATTAAATATTTTATTAAATAGAAATA-AAAAAAATTTTAAATCGTGG-AGGAAGGGGGGGCGGATGTAGCCAAGTGG

H11
>SC02
CTGCTATTGA--GCCCCATCTACAAAT-GGATAA-TTCTGTC-TTAGTGGA-GACGA-GTTTTTGAAAATAACGG-AGAAATACCGACTCTCTTGCAAGAGAGTCGGTATTTCTCAGTTATTTTTTATGTTTT-TCTTTAGTAG---------------TTTTTTATTTCTATCCTTTTTT-TACGAAAAGTAT-TTTTATGCTTTTGCT--TTGATTTTGTCTGATATTTTTGTT----ATGGTTATGAGCTCATATTCGTTATGTACCAGTA--TAATAATATTAGTTATTTGTTAATCCCACTAATAA------AGTTCTAATTTTATTAATTCGATTCTAATTTTCGAATTTT-------TTAGTTTTTTTAATAG--AAAATA-AAAGAAAAGAGAAAGTTGTAA---TTTTATGCCTCTTAGAT-CTTCATTTCTATTT---------------TAAATGGTAG-AAATTGAAACCTTTTTATTAAATATTTTATTAAATAGAAATA-AAAAAAATTTTAAATCGTGG-AGGAAGGGGGGGCGGATGTAGCCAAGTGG
>SC04
CTGCTATTGA--GCCCCATCTACAAAT-GGATAA-TTCTGTC-TTAGTGGA-GACGA-GTTTTTGAAAATAACGG-AGAAATACCGACTCTCTTGCAAGAGAGTCGGTATTTCTCAGTTATTTTTTATGTTTT-TCTTTAGTAG---------------TTTTTTATTTCTATCCTTTTTT-TACGAAAAGTAT-TTTTATGCTTTTGCT--TTGATTTTGTCTGATATTTTTGTT----ATGGTTATGAGCTCATATTCGTTATGTACCAGTA--TAATAATATTAGTTATTTGTTAATCCCACTAATAA------AGTTCTAATTTTATTAATTCGATTCTAATTTTCGAATTTT-------TTAGTTTTTTTAATAG--AAAATA-AAAGAAAAGAGAAAGTTGTAA---TTTTATGCCTCTTAGAT-CTTCATTTCTATTT---------------TAAATGGTAG-AAATTGAAACCTTTTTATTAAATATTTTATTAAATAGAAATA-AAAAAAATTTTAAATCGTGG-AGGAAGGGGGGGCGGATGTAGCCAAGTGG

H12
>CB01
CTGCTATTGA--GCCCCATCTACAAAT-GGATAA-TTCTGTC-TTAGTGGA-GACGA-GTTTTTGAAAATAACGG-AGAAATACCGACTCTCTTGCAAGAGAGTCGGTATTTCTCAGTTATTTTTTATGTTTT-TCTTTAGTAG---------------TTTTTTATTTCTATCCTTTTTT-TACGAAAAGTAT-TTTTATGCTTTTGCT--TTGATTTTGTCTGATATTTTTGTT----ATGGTTATGGGCTCATATTCGTTATGTACCAGTA--TAATAATATTAGTTATTTGTTAATCCCACTAATAA------AGTTCTAATTTTATTAATTCGATTCTAATTTTCGAATTTT-------TTAGTTTTTTTAATAG--AAAATA-AAAGAAAAGAGAAAGTTGTAA---TTTTATGCCTCTTAGAT-CTTCATTTCTATTT---------------TAAATGGTAG-AAATTGAAACCTTTTTATTAAATATTTTATTAAATAGAAATA-AAAAAATTTTTAAATCGTGG-AGGAAGGGGGGGCGGATGTAGCCAAGTGG
>CB13
CTGCTATTGA--GCCCCATCTACAAAT-GGATAA-TTCTGTC-TTAGTGGA-GACGA-GTTTTTGAAAATAACGG-AGAAATACCGACTCTCTTGCAAGAGAGTCGGTATTTCTCAGTTATTTTTTATGTTTT-TCTTTAGTAG---------------TTTTTTATTTCTATCCTTTTTT-TACGAAAAGTAT-TTTTATGCTTTTGCT--TTGATTTTGTCTGATATTTTTGTT----ATGGTTATGGGCTCATATTCGTTATGTACCAGTA--TAATAATATTAGTTATTTGTTAATCCCACTAATAA------AGTTCTAATTTTATTAATTCGATTCTAATTTTCGAATTTT-------TTAGTTTTTTTAATAG--AAAATA-AAAGAAAAGAGAAAGTTGTAA---TTTTATGCCTCTTAGAT-CTTCATTTCTATTT---------------TAAATGGTAG-AAATTGAAACCTTTTTATTAAATATTTTATTAAATAGAAATA-AAAAAATTTTTAAATCGTGG-AGGAAGGGGGGGCGGATGTAGCCAAGTGG
>CB20
CTGCTATTGA--GCCCCATCTACAAAT-GGATAA-TTCTGTC-TTAGTGGA-GACGA-GTTTTTGAAAATAACGG-AGAAATACCGACTCTCTTGCAAGAGAGTCGGTATTTCTCAGTTATTTTTTATGTTTT-TCTTTAGTAG---------------TTTTTTATTTCTATCCTTTTTT-TACGAAAAGTAT-TTTTATGCTTTTGCT--TTGATTTTGTCTGATATTTTTGTT----ATGGTTATGGGCTCATATTCGTTATGTACCAGTA--TAATAATATTAGTTATTTGTTAATCCCACTAATAA------AGTTCTAATTTTATTAATTCGATTCTAATTTTCGAATTTT-------TTAGTTTTTTTAATAG--AAAATA-AAAGAAAAGAGAAAGTTGTAA---TTTTATGCCTCTTAGAT-CTTCATTTCTATTT---------------TAAATGGTAG-AAATTGAAACCTTTTTATTAAATATTTTATTAAATAGAAATA-AAAAAATTTTTAAATCGTGG-AGGAAGGGGGGGCGGATGTAGCCAAGTGG

H13
>CB02
CTGCTATTGA--GCCCCATCTACAAAT-GGATAA-TTCTGTC-TTAGTGGA-GACG-AGTTTTTGAAAATAACGG-AGAAATACCGACTCTCTTGCAAGAGAGTCGGTATTTCTCCGTTATTTTTTATGTTTT-TCTTTAGTAG---------------TTTTTTATTTCTATCCTTTTTT-TG-GGGCAGTAT-TTTTATGCTTTTGCT--TTGATTTTGTCTGATATTTTTGTT----ATGGTTATGGGCTCATATTCGTTATGTACCAGTA--TAATAATATTAGTTATTTGTTAATCCCACTAATAA------AGTTCTAATTTTATTAATTCGATTCTAATTTTCGAATTTT-------TTAGTTTTTTTAATAG--AAAATA-AAAGAAAAGAGAAAGTTGTAA---TTTTATGCCTCTTAGAT-CTTCATTTCTATTT---------------TAAATGGTAG-AAATTGAAACCTTTTTATTAAATATTTTATTAAATAGAAATA-AAAAAATTTTTAAATCGTGG-AGGAAGGGGGGGCGGATGTAGCCAAGTGG
>CB03
CTGCTATTGA--GCCCCATCTACAAAT-GGATAA-TTCTGTC-TTAGTGGA-GACG-AGTTTTTGAAAATAACGG-AGAAATACCGACTCTCTTGCAAGAGAGTCGGTATTTCTCCGTTATTTTTTATGTTTT-TCTTTAGTAG---------------TTTTTTATTTCTATCCTTTTTT-TG-GGGCAGTAT-TTTTATGCTTTTGCT--TTGATTTTGTCTGATATTTTTGTT----ATGGTTATGGGCTCATATTCGTTATGTACCAGTA--TAATAATATTAGTTATTTGTTAATCCCACTAATAA------AGTTCTAATTTTATTAATTCGATTCTAATTTTCGAATTTT-------TTAGTTTTTTTAATAG--AAAATA-AAAGAAAAGAGAAAGTTGTAA---TTTTATGCCTCTTAGAT-CTTCATTTCTATTT---------------TAAATGGTAG-AAATTGAAACCTTTTTATTAAATATTTTATTAAATAGAAATA-AAAAAATTTTTAAATCGTGG-AGGAAGGGGGGGCGGATGTAGCCAAGTGG
>CB05
CTGCTATTGA--GCCCCATCTACAAAT-GGATAA-TTCTGTC-TTAGTGGA-GACG-AGTTTTTGAAAATAACGG-AGAAATACCGACTCTCTTGCAAGAGAGTCGGTATTTCTCCGTTATTTTTTATGTTTT-TCTTTAGTAG---------------TTTTTTATTTCTATCCTTTTTT-TG-GGGCAGTAT-TTTTATGCTTTTGCT--TTGATTTTGTCTGATATTTTTGTT----ATGGTTATGGGCTCATATTCGTTATGTACCAGTA--TAATAATATTAGTTATTTGTTAATCCCACTAATAA------AGTTCTAATTTTATTAATTCGATTCTAATTTTCGAATTTT-------TTAGTTTTTTTAATAG--AAAATA-AAAGAAAAGAGAAAGTTGTAA---TTTTATGCCTCTTAGAT-CTTCATTTCTATTT---------------TAAATGGTAG-AAATTGAAACCTTTTTATTAAATATTTTATTAAATAGAAATA-AAAAAATTTTTAAATCGTGG-AGGAAGGGGGGGCGGATGTAGCCAAGTGG
>CB08
CTGCTATTGA--GCCCCATCTACAAAT-GGATAA-TTCTGTC-TTAGTGGA-GACG-AGTTTTTGAAAATAACGG-AGAAATACCGACTCTCTTGCAAGAGAGTCGGTATTTCTCCGTTATTTTTTATGTTTT-TCTTTAGTAG---------------TTTTTTATTTCTATCCTTTTTT-TG-GGGCAGTAT-TTTTATGCTTTTGCT--TTGATTTTGTCTGATATTTTTGTT----ATGGTTATGGGCTCATATTCGTTATGTACCAGTA--TAATAATATTAGTTATTTGTTAATCCCACTAATAA------AGTTCTAATTTTATTAATTCGATTCTAATTTTCGAATTTT-------TTAGTTTTTTTAATAG--AAAATA-AAAGAAAAGAGAAAGTTGTAA---TTTTATGCCTCTTAGAT-CTTCATTTCTATTT---------------TAAATGGTAG-AAATTGAAACCTTTTTATTAAATATTTTATTAAATAGAAATA-AAAAAATTTTTAAATCGTGG-AGGAAGGGGGGGCGGATGTAGCCAAGTGG

H14
>CB04
CTGCTATTGA--GCCCCATCTACAAAT-GGATAA-TTCTGTC-TTAGTGGA-GACG-AGTTTTTGAAAATAACGG-AGAAATACCGACTCTCTTGCAAGAGAGTCGGTATTTCTCCGTTATTTTTTATGTTTT-TCTTTAGTAG---------------TTTTTTATTTCTATCCTTTTTT-TG-GGGCTGTAT-TTTTATGCTTTTGCT--TTGATTTTGTCTGATATTTTTGTT----ATGGTTATGGGCTCATATTCGTTATGTACCAGTA--TAATAATATTAGTTATTTGTTAATCCCACTAATAA------AGTTCTAATTTTATTAATTCGATTCTAATTTTCGAATTTT-------TTAGTTTTTTTAATAG--AAAATA-AAAGAAAAGAGAAAGTTGTAA---TTTTATGCCTCTTAGAT-CTTCATTTCTATTT---------------TAAATGGTAG-AAATTGAAACCTTTTTATTAAATATTTTATTAAATAGAAATA-AAAAAATTTTTAAATCGTGG-AGGAAGGGGGGGCGGATGTAGCCAAGTGG
>CB09
CTGCTATTGA--GCCCCATCTACAAAT-GGATAA-TTCTGTC-TTAGTGGA-GACG-AGTTTTTGAAAATAACGG-AGAAATACCGACTCTCTTGCAAGAGAGTCGGTATTTCTCCGTTATTTTTTATGTTTT-TCTTTAGTAG---------------TTTTTTATTTCTATCCTTTTTT-TG-GGGCTGTAT-TTTTATGCTTTTGCT--TTGATTTTGTCTGATATTTTTGTT----ATGGTTATGGGCTCATATTCGTTATGTACCAGTA--TAATAATATTAGTTATTTGTTAATCCCACTAATAA------AGTTCTAATTTTATTAATTCGATTCTAATTTTCGAATTTT-------TTAGTTTTTTTAATAG--AAAATA-AAAGAAAAGAGAAAGTTGTAA---TTTTATGCCTCTTAGAT-CTTCATTTCTATTT---------------TAAATGGTAG-AAATTGAAACCTTTTTATTAAATATTTTATTAAATAGAAATA-AAAAAATTTTTAAATCGTGG-AGGAAGGGGGGGCGGATGTAGCCAAGTGG
>CB06
CTGCTATTGA--GCCCCATCTACAAAT-GGATAA-TTCTGTC-TTAGTGGA-GACG-AGTTTTTGAAAATAACGG-AGAAATACCGACTCTCTTGCAAGAGAGTCGGTATTTCTCCGTTATTTTTTATGTTTT-TCTTTAGTAG---------------TTTTTTATTTCTATCCTTTTTT-TG-GGGCTGTAT-TTTTATGCTTTTGCT--TTGATTTTGTCTGATATTTTTGTT----ATGGTTATGGGCTCATATTCGTTATGTACCAGTA--TAATAATATTAGTTATTTGTTAATCCCACTAATAA------AGTTCTAATTTTATTAATTCGATTCTAATTTTCGAATTTT-------TTAGTTTTTTTAATAG--AAAATA-AAAGAAAAGAGAAAGTTGTAA---TTTTATGCCTCTTAGAT-CTTCATTTCTATTT---------------TAAATGGTAG-AAATTGAAACCTTTTTATTAAATATTTTATTAAATAGAAATA-AAAAAATTTTTAAATCGTGG-AGGAAGGGGGGGCGGATGTAGCCAAGTGG

H15
>XL05
CTGCTATTGA--GCCCCATCTACAAAT-GGATAA-TTCTGTC-TTAGTGGA-GACG-AGTTTTTGAAAATAACGG-AGAAATACCGACTCTCTTGCAAGAGAGTCGGTATTTCTCAGTTATTTTTTATGTTTT-TCTTTAGTAG---------------TTTTTTATTTCTATCTTTTTTT-TACGGGCAGTAT-TTTTATGCTTTTGCT--TTGATTTTGTCTGATATTTTTGTT----ATGGTTATGGGCTCATATTCGTTATGTACCAGTA--TAATAATATTAGTTATTTGTTAATCCCACTAATAA------AGTTCTAATTTTATTAATTCGATTCTAATTTTCGAATTTT-------TTAGTTTTTTTAATAT--AAAATA-AAAGAAAAGAGAAAGTTGTAA---TTTTATGCCTCTTAGAT-CTTCATTTCTATTTTAATCATTTCTATTTTAAATGGTAG-AAATTGAAACCTTTTTATTAAATATTTTATTAAATAGAAATA-AAAAAATTTTTAAATCGTGG-AGGAAGGGGGGGCGGATGTAGCCAAGTGG
>XL07
CTGCTATTGA--GCCCCATCTACAAAT-GGATAA-TTCTGTC-TTAGTGGA-GACG-AGTTTTTGAAAATAACGG-AGAAATACCGACTCTCTTGCAAGAGAGTCGGTATTTCTCAGTTATTTTTTATGTTTT-TCTTTAGTAG---------------TTTTTTATTTCTATCTTTTTTT-TACGGGCAGTAT-TTTTATGCTTTTGCT--TTGATTTTGTCTGATATTTTTGTT----ATGGTTATGGGCTCATATTCGTTATGTACCAGTA--TAATAATATTAGTTATTTGTTAATCCCACTAATAA------AGTTCTAATTTTATTAATTCGATTCTAATTTTCGAATTTT-------TTAGTTTTTTTAATAT--AAAATA-AAAGAAAAGAGAAAGTTGTAA---TTTTATGCCTCTTAGAT-CTTCATTTCTATTTTAATCATTTCTATTTTAAATGGTAG-AAATTGAAACCTTTTTATTAAATATTTTATTAAATAGAAATA-AAAAAATTTTTAAATCGTGG-AGGAAGGGGGGGCGGATGTAGCCAAGTGG
>XL022
CTGCTATTGA--GCCCCATCTACAAAT-GGATAA-TTCTGTC-TTAGTGGA-GACG-AGTTTTTGAAAATAACGG-AGAAATACCGACTCTCTTGCAAGAGAGTCGGTATTTCTCAGTTATTTTTTATGTTTT-TCTTTAGTAG---------------TTTTTTATTTCTATCTTTTTTT-TACGGGCAGTAT-TTTTATGCTTTTGCT--TTGATTTTGTCTGATATTTTTGTT----ATGGTTATGGGCTCATATTCGTTATGTACCAGTA--TAATAATATTAGTTATTTGTTAATCCCACTAATAA------AGTTCTAATTTTATTAATTCGATTCTAATTTTCGAATTTT-------TTAGTTTTTTTAATAT--AAAATA-AAAGAAAAGAGAAAGTTGTAA---TTTTATGCCTCTTAGAT-CTTCATTTCTATTTTAATCATTTCTATTTTAAATGGTAG-AAATTGAAACCTTTTTATTAAATATTTTATTAAATAGAAATA-AAAAAATTTTTAAATCGTGG-AGGAAGGGGGGGCGGATGTAGCCAAGTGG
>XL24
CTGCTATTGA--GCCCCATCTACAAAT-GGATAA-TTCTGTC-TTAGTGGA-GACG-AGTTTTTGAAAATAACGG-AGAAATACCGACTCTCTTGCAAGAGAGTCGGTATTTCTCAGTTATTTTTTATGTTTT-TCTTTAGTAG---------------TTTTTTATTTCTATCTTTTTTT-TACGGGCAGTAT-TTTTATGCTTTTGCT--TTGATTTTGTCTGATATTTTTGTT----ATGGTTATGGGCTCATATTCGTTATGTACCAGTA--TAATAATATTAGTTATTTGTTAATCCCACTAATAA------AGTTCTAATTTTATTAATTCGATTCTAATTTTCGAATTTT-------TTAGTTTTTTTAATAT--AAAATA-AAAGAAAAGAGAAAGTTGTAA---TTTTATGCCTCTTAGAT-CTTCATTTCTATTTTAATCATTTCTATTTTAAATGGTAG-AAATTGAAACCTTTTTATTAAATATTTTATTAAATAGAAATA-AAAAAATTTTTAAATCGTGG-AGGAAGGGGGGGCGGATGTAGCCAAGTGG

H16
>CB10
CTGCTATTGA--GCCCCATCTACAAAT-GGATAA-TTCTGTC-TTAGTGGA-GACGA-GTTTTTGAAAATAACGG-AGAAATACCGACTCTCTTGCAAGAGAGTCGGTATTTCTCCGTTATTTTTTATGTTTT-TCTTTAGTAG---------------TTTTTTATTTCTATCCTTTTTT-TACGAAAAGTAT-TTTTATGCTTTTGCT--TTGATTTTGTCTGATATTTTTGTT----ATGGTTATGGGCTCATATTCGTTATGTACCAGTA--TAATAATATTAGTTATTTGTTAATCCCACTAATAA------AGTTCTAATTTTATTAATTCGATTCTAATTTTCGAATTTT-------TTAGTTTTTTTAATAG--AAAATA-AAAGAAAAGAGAAAGTTGTAA---TTTTATGCCTCTTAGAT-CTTCATTTCTATTT---------------TAAATGGTAG-AAATTGAAACCTTTTTATTAAATATTTTATTAAATAGAAATA-AAAAAATTTTTAAATCGTGG-AGGAAGGGGGGGCGGATGTAGCCAAGTGG
>CB11
CTGCTATTGA--GCCCCATCTACAAAT-GGATAA-TTCTGTC-TTAGTGGA-GACGA-GTTTTTGAAAATAACGG-AGAAATACCGACTCTCTTGCAAGAGAGTCGGTATTTCTCCGTTATTTTTTATGTTTT-TCTTTAGTAG---------------TTTTTTATTTCTATCCTTTTTT-TACGAAAAGTAT-TTTTATGCTTTTGCT--TTGATTTTGTCTGATATTTTTGTT----ATGGTTATGGGCTCATATTCGTTATGTACCAGTA--TAATAATATTAGTTATTTGTTAATCCCACTAATAA------AGTTCTAATTTTATTAATTCGATTCTAATTTTCGAATTTT-------TTAGTTTTTTTAATAG--AAAATA-AAAGAAAAGAGAAAGTTGTAA---TTTTATGCCTCTTAGAT-CTTCATTTCTATTT---------------TAAATGGTAG-AAATTGAAACCTTTTTATTAAATATTTTATTAAATAGAAATA-AAAAAATTTTTAAATCGTGG-AGGAAGGGGGGGCGGATGTAGCCAAGTGG
>CB16
CTGCTATTGA--GCCCCATCTACAAAT-GGATAA-TTCTGTC-TTAGTGGA-GACGA-GTTTTTGAAAATAACGG-AGAAATACCGACTCTCTTGCAAGAGAGTCGGTATTTCTCCGTTATTTTTTATGTTTT-TCTTTAGTAG---------------TTTTTTATTTCTATCCTTTTTT-TACGAAAAGTAT-TTTTATGCTTTTGCT--TTGATTTTGTCTGATATTTTTGTT----ATGGTTATGGGCTCATATTCGTTATGTACCAGTA--TAATAATATTAGTTATTTGTTAATCCCACTAATAA------AGTTCTAATTTTATTAATTCGATTCTAATTTTCGAATTTT-------TTAGTTTTTTTAATAG--AAAATA-AAAGAAAAGAGAAAGTTGTAA---TTTTATGCCTCTTAGAT-CTTCATTTCTATTT---------------TAAATGGTAG-AAATTGAAACCTTTTTATTAAATATTTTATTAAATAGAAATA-AAAAAATTTTTAAATCGTGG-AGGAAGGGGGGGCGGATGTAGCCAAGTGG
>CB23
CTGCTATTGA--GCCCCATCTACAAAT-GGATAA-TTCTGTC-TTAGTGGA-GACGA-GTTTTTGAAAATAACGG-AGAAATACCGACTCTCTTGCAAGAGAGTCGGTATTTCTCCGTTATTTTTTATGTTTT-TCTTTAGTAG---------------TTTTTTATTTCTATCCTTTTTT-TACGAAAAGTAT-TTTTATGCTTTTGCT--TTGATTTTGTCTGATATTTTTGTT----ATGGTTATGGGCTCATATTCGTTATGTACCAGTA--TAATAATATTAGTTATTTGTTAATCCCACTAATAA------AGTTCTAATTTTATTAATTCGATTCTAATTTTCGAATTTT-------TTAGTTTTTTTAATAG--AAAATA-AAAGAAAAGAGAAAGTTGTAA---TTTTATGCCTCTTAGAT-CTTCATTTCTATTT---------------TAAATGGTAG-AAATTGAAACCTTTTTATTAAATATTTTATTAAATAGAAATA-AAAAAATTTTTAAATCGTGG-AGGAAGGGGGGGCGGATGTAGCCAAGTGG

H17
>CB12
CTGCTATTGA--GCCCCATCTACAAAT-GGATAA-TTCTGTC-TTAGTGGA-GACGA-GTTTTTGAAAATAACGG-AGAAATACCGACTCTCTTGCAAGAGAGTCGGTATTTCTCCGTTATTTTTTATGTTTT-TCTTTAGTAG---------------TTTTTTATTTCTATCCTTTTTT-TACGAAAAGTAT-TTTTATGCTTTTGCT--TTGATTTTGTCTGATATTTTTGTT----ATGGTTATGGGCTCATATTCGTTATGTACCAGTA--TAATAATATTAGTTATTTGTTAATCCCACTAATAA------AGTTCTAATTTTATTAATTCGATTCTAATTTTCGAATTTT-------TTAGTTTTTTTAATAG--AAAATA-AAAGAAAAGAGAAAGTTGTAA---TTTTATGCCTCTTAGAT-CTTCATTTCTATTT---------------TAAATGGTAG-AAATTGAAACCCTTTTATTAAATATTTTATTAAATAGAAATA-AAAAAAATTTTAAATCGTGG-AGGAAGGGGGGGCGGATGTAGCCAAGTGG
>CB21
CTGCTATTGA--GCCCCATCTACAAAT-GGATAA-TTCTGTC-TTAGTGGA-GACGA-GTTTTTGAAAATAACGG-AGAAATACCGACTCTCTTGCAAGAGAGTCGGTATTTCTCCGTTATTTTTTATGTTTT-TCTTTAGTAG---------------TTTTTTATTTCTATCCTTTTTT-TACGAAAAGTAT-TTTTATGCTTTTGCT--TTGATTTTGTCTGATATTTTTGTT----ATGGTTATGGGCTCATATTCGTTATGTACCAGTA--TAATAATATTAGTTATTTGTTAATCCCACTAATAA------AGTTCTAATTTTATTAATTCGATTCTAATTTTCGAATTTT-------TTAGTTTTTTTAATAG--AAAATA-AAAGAAAAGAGAAAGTTGTAA---TTTTATGCCTCTTAGAT-CTTCATTTCTATTT---------------TAAATGGTAG-AAATTGAAACCCTTTTATTAAATATTTTATTAAATAGAAATA-AAAAAAATTTTAAATCGTGG-AGGAAGGGGGGGCGGATGTAGCCAAGTGG
>XN05
CTGCTATTGA--GCCCCATCTACAAAT-GGATAA-TTCTGTC-TTAGTGGA-GACGA-GTTTTTGAAAATAACGG-AGAAATACCGACTCTCTTGCAAGAGAGTCGGTATTTCTCCGTTATTTTTTATGTTTT-TCTTTAGTAG---------------TTTTTTATTTCTATCCTTTTTT-TACGAAAAGTAT-TTTTATGCTTTTGCT--TTGATTTTGTCTGATATTTTTGTT----ATGGTTATGGGCTCATATTCGTTATGTACCAGTA--TAATAATATTAGTTATTTGTTAATCCCACTAATAA------AGTTCTAATTTTATTAATTCGATTCTAATTTTCGAATTTT-------TTAGTTTTTTTAATAG--AAAATA-AAAGAAAAGAGAAAGTTGTAA---TTTTATGCCTCTTAGAT-CTTCATTTCTATTT---------------TAAATGGTAG-AAATTGAAACCCTTTTATTAAATATTTTATTAAATAGAAATA-AAAAAAATTTTAAATCGTGG-AGGAAGGGGGGGCGGATGTAGCCAAGTGG

H18
>WM13
CTGCTATTGA--GCCCCATCTACAAAT-GGATAA-TTCTGTC-TTAGTGGA-GACG-AGTTTTTGAAAATAACGG-AGAAATACCGACTCTCTTGCAAGAGAGTCGGTATTTCTCCGTTATTTTTTATGTTTT-TCTTTAGTAG---------------TTTTTTATTTCTATCTTTTTTT-TACGGGCAGTAT-TTTTATGCTTTTGCT--TTGGTT-TGTCTGATATTTTTGTT----ATGGTTATGGGCTCATATTCGTTATGTACCAGTA--TAATAATATTAGTTATTTGTTAATCCCACTAATAA------AGTTCTAATTTTATTAATTCGATTCTAATTTTCGAATTTT-------TTAGTTTTTTTAATAT--AAAATA-AAAGAAAAGAGAAAGTTGTAA---TTTTATGCCTCTTAGAT-CTTCATTTCTATTTTAATCATTTCTATTTTAAATGGTAG-AAATTGAAACCTTTTTATTAAATATTTTATTAAATACAAATA-AAAAAATTTTTAAATCGTGG-AGGAAGGGGGGGCGGATGTAGCCAAGTGG
>LD06
CTGCTATTGA--GCCCCATCTACAAAT-GGATAA-TTCTGTC-TTAGTGGA-GACG-AGTTTTTGAAAATAACGG-AGAAATACCGACTCTCTTGCAAGAGAGTCGGTATTTCTCCGTTATTTTTTATGTTTT-TCTTTAGTAG---------------TTTTTTATTTCTATCTTTTTTT-TACGGGCAGTAT-TTTTATGCTTTTGCT--TTGGTT-TGTCTGATATTTTTGTT----ATGGTTATGGGCTCATATTCGTTATGTACCAGTA--TAATAATATTAGTTATTTGTTAATCCCACTAATAA------AGTTCTAATTTTATTAATTCGATTCTAATTTTCGAATTTT-------TTAGTTTTTTTAATAT--AAAATA-AAAGAAAAGAGAAAGTTGTAA---TTTTATGCCTCTTAGAT-CTTCATTTCTATTTTAATCATTTCTATTTTAAATGGTAG-AAATTGAAACCTTTTTATTAAATATTTTATTAAATACAAATA-AAAAAATTTTTAAATCGTGG-AGGAAGGGGGGGCGGATGTAGCCAAGTGG

H19
>CB15
CTGCTATTGA--GCCCCATCTACAAATAGGATAA-TTCTGTC-TTAGTGGA-GACG-AGTTTTTGAAAATAACGG-AGAAATACCGACTCTCTTGCAAGAGAGTCGGTATTTCTCAGTTATTTTTTATGTTTT-TCTTTAGTAG---------------TTTTTTATTTCTATCCTTTTTT-TG-GGGCAGTAT-TTTTATGCTTTTGCT--TTGATTTTGTCTGATATTTTTGTT----ATGGTTATGGGCTCATATTCGTTATGTACCAGTA--TAATAATATTAGTTATTTGTTAATCCCACTAATAA------AGTTCTAATTTTATTAATTCGATTCTAATTTTCGAATTTT-------TTAGTTTTTTTAATAG--AAAATA-AAAGAAAAGAGAAAGTTGTAA---TTTTATGCCTCTTAGAT-CTTCATTTCTATTT---------------TAAATGGTAG-AAATTGAAACCCTTTTATTAAATATTTTATTAAATAGAAATA-AAAAAAATTTTAAATCGTGG-AGGAAGGGGGGGCGGATGTAGCCAAGTGG
>CB19
CTGCTATTGA--GCCCCATCTACAAATAGGATAA-TTCTGTC-TTAGTGGA-GACG-AGTTTTTGAAAATAACGG-AGAAATACCGACTCTCTTGCAAGAGAGTCGGTATTTCTCAGTTATTTTTTATGTTTT-TCTTTAGTAG---------------TTTTTTATTTCTATCCTTTTTT-TG-GGGCAGTAT-TTTTATGCTTTTGCT--TTGATTTTGTCTGATATTTTTGTT----ATGGTTATGGGCTCATATTCGTTATGTACCAGTA--TAATAATATTAGTTATTTGTTAATCCCACTAATAA------AGTTCTAATTTTATTAATTCGATTCTAATTTTCGAATTTT-------TTAGTTTTTTTAATAG--AAAATA-AAAGAAAAGAGAAAGTTGTAA---TTTTATGCCTCTTAGAT-CTTCATTTCTATTT---------------TAAATGGTAG-AAATTGAAACCCTTTTATTAAATATTTTATTAAATAGAAATA-AAAAAAATTTTAAATCGTGG-AGGAAGGGGGGGCGGATGTAGCCAAGTGG

H20
>WM16
CTGCTATTGA--GCCCCATCTACAAAT-GGATAA-TTCTGTC-TTAGTGGA-GACG-AGTTTTTGAAAATAACGG-AGAAATACCGACTCTCTTGCAAGAGAGTCGGTATTTCTCCGTTATTTTTTATGTTTT-TCTTTAGTAG---------------TTTTTTATTTCTATCTTTTTTT-TACGAAAAGTAT-TTTTATGCTTTTGCT--TTGATTTTGTCTGATATTTTTGTT----ATGGTTATGGGCTCATATTCGTTATGTACCAGTA--TAATAATATTAGTTATTTGTTAATCCCACTAATAA------AGTTCTAATTTTATTAATTCGATTCTAATTTTCGAATTTT-------TTAGTTTTTTTAATAT--AAAATA-AAAGAAAAGAGAAAGTTGTAA---TTTTATGCCTCTTAGAT-CTTCATTTCTATTTTAATCATTTCTATTTTAAATGGTAG-AAATTGAAACCTTTTTATTAAATATTTTATTAAATACAAATA-AAAAAATTTTTAAATCGTGG-AGGAAGGGGGGGCGGATGTAGCCAAGTGG
>WM17
CTGCTATTGA--GCCCCATCTACAAAT-GGATAA-TTCTGTC-TTAGTGGA-GACG-AGTTTTTGAAAATAACGG-AGAAATACCGACTCTCTTGCAAGAGAGTCGGTATTTCTCCGTTATTTTTTATGTTTT-TCTTTAGTAG---------------TTTTTTATTTCTATCTTTTTTT-TACGAAAAGTAT-TTTTATGCTTTTGCT--TTGATTTTGTCTGATATTTTTGTT----ATGGTTATGGGCTCATATTCGTTATGTACCAGTA--TAATAATATTAGTTATTTGTTAATCCCACTAATAA------AGTTCTAATTTTATTAATTCGATTCTAATTTTCGAATTTT-------TTAGTTTTTTTAATAT--AAAATA-AAAGAAAAGAGAAAGTTGTAA---TTTTATGCCTCTTAGAT-CTTCATTTCTATTTTAATCATTTCTATTTTAAATGGTAG-AAATTGAAACCTTTTTATTAAATATTTTATTAAATACAAATA-AAAAAATTTTTAAATCGTGG-AGGAAGGGGGGGCGGATGTAGCCAAGTGG
>WM24
CTGCTATTGA--GCCCCATCTACAAAT-GGATAA-TTCTGTC-TTAGTGGA-GACG-AGTTTTTGAAAATAACGG-AGAAATACCGACTCTCTTGCAAGAGAGTCGGTATTTCTCCGTTATTTTTTATGTTTT-TCTTTAGTAG---------------TTTTTTATTTCTATCTTTTTTT-TACGAAAAGTAT-TTTTATGCTTTTGCT--TTGATTTTGTCTGATATTTTTGTT----ATGGTTATGGGCTCATATTCGTTATGTACCAGTA--TAATAATATTAGTTATTTGTTAATCCCACTAATAA------AGTTCTAATTTTATTAATTCGATTCTAATTTTCGAATTTT-------TTAGTTTTTTTAATAT--AAAATA-AAAGAAAAGAGAAAGTTGTAA---TTTTATGCCTCTTAGAT-CTTCATTTCTATTTTAATCATTTCTATTTTAAATGGTAG-AAATTGAAACCTTTTTATTAAATATTTTATTAAATACAAATA-AAAAAATTTTTAAATCGTGG-AGGAAGGGGGGGCGGATGTAGCCAAGTGG
>WM30
CTGCTATTGA--GCCCCATCTACAAAT-GGATAA-TTCTGTC-TTAGTGGA-GACG-AGTTTTTGAAAATAACGG-AGAAATACCGACTCTCTTGCAAGAGAGTCGGTATTTCTCCGTTATTTTTTATGTTTT-TCTTTAGTAG---------------TTTTTTATTTCTATCTTTTTTT-TACGAAAAGTAT-TTTTATGCTTTTGCT--TTGATTTTGTCTGATATTTTTGTT----ATGGTTATGGGCTCATATTCGTTATGTACCAGTA--TAATAATATTAGTTATTTGTTAATCCCACTAATAA------AGTTCTAATTTTATTAATTCGATTCTAATTTTCGAATTTT-------TTAGTTTTTTTAATAT--AAAATA-AAAGAAAAGAGAAAGTTGTAA---TTTTATGCCTCTTAGAT-CTTCATTTCTATTTTAATCATTTCTATTTTAAATGGTAG-AAATTGAAACCTTTTTATTAAATATTTTATTAAATACAAATA-AAAAAATTTTTAAATCGTGG-AGGAAGGGGGGGCGGATGTAGCCAAGTGG

H21
>WM19
CTGCTATTGA--GCCCCATCTACAAAT-GGATAA-TTCTGTC-TTAGTGGA-GACG-AGTTTTTGAAAATAACGG-AGAAATACCGACTCTCTTGCAAGAGAGTCGGTATTTCTCCGTTATTTTTTATGTTTT-TCTTTAGTAG---------------TTTTTTATTTCTATCTTTTTTT-TACGAAAAGTAT-TTTTATGCTTTTGCT--TTGGAAGTGTCTGATATTTTTGTT----ATGGTTATGGGCTCATATTCGTTATGTACCAGTA--TAATAATATTAGTTATTTGTTAATCCCACTAATAA------AGTTCTAATTTTATTAATTCGATTCTAATTTTCGAATTTT-------TTAGTTTTTTTAATAT--AAAATA-AAAGAAAAGAGAAAGTTGTAA---TTTTATGCCTCTTAGAT-CTTCATTTCTATTTTAATCATTTCTATTTTAAATGGTAG-AAATTGAAACCTTTTTATTAAATATTTTATTAAATAGAAATA-AAAAAATTTTTAAATCGTGG-AGGAAGGGGGGGCGGATGTAGCCAAGTGG
>LD05
CTGCTATTGA--GCCCCATCTACAAAT-GGATAA-TTCTGTC-TTAGTGGA-GACG-AGTTTTTGAAAATAACGG-AGAAATACCGACTCTCTTGCAAGAGAGTCGGTATTTCTCCGTTATTTTTTATGTTTT-TCTTTAGTAG---------------TTTTTTATTTCTATCTTTTTTT-TACGAAAAGTAT-TTTTATGCTTTTGCT--TTGGAAGTGTCTGATATTTTTGTT----ATGGTTATGGGCTCATATTCGTTATGTACCAGTA--TAATAATATTAGTTATTTGTTAATCCCACTAATAA------AGTTCTAATTTTATTAATTCGATTCTAATTTTCGAATTTT-------TTAGTTTTTTTAATAT--AAAATA-AAAGAAAAGAGAAAGTTGTAA---TTTTATGCCTCTTAGAT-CTTCATTTCTATTTTAATCATTTCTATTTTAAATGGTAG-AAATTGAAACCTTTTTATTAAATATTTTATTAAATAGAAATA-AAAAAATTTTTAAATCGTGG-AGGAAGGGGGGGCGGATGTAGCCAAGTGG

H22
>WM20
CTGCTATTGA--GCCCCATCTACAAAT-GGATAA-TTCTGTC-TTAGTGGA-GACG-AGTTTTTGAAAATAACGG-AGAAATACCGACTCTCTTGCAAGAGAGTCGGTATTTCTCCGTTATTTTTTATGTTTT-TCTTTAGTAG---------------TTTTTTATTTCTATCTTTTTTT-TACGAAAAGTAT-TTTTATGCTTTTGCT--TTGATTTTGTCTGATATTTTTGTT----ATGGTTATGAGCTCATATTCGTTATGTACCAGTA--TAATAATATTAGTTATTTGTTAATCCCACTAATAA------AGTTCTAATTTTATTAATTCGATTCTAATTTTCGAATTTT-------TTAGTTTTTTTAATAT--AAAATA-AAAGAAAAGAGAAAGTTGTAA---TTTTATGCCTCTTAGAT-CTTCATTTCTATTTTAATCATTTCTATTTTAAATGGTAG-AAATTGAAACCTTTTTATTAAATATTTTATTAAATACAAATA-AAAAAATTTTTAAATCGTGG-AGGAAGGGGGGGCGGATGTAGCCAAGTGG
>LD09
CTGCTATTGA--GCCCCATCTACAAAT-GGATAA-TTCTGTC-TTAGTGGA-GACG-AGTTTTTGAAAATAACGG-AGAAATACCGACTCTCTTGCAAGAGAGTCGGTATTTCTCCGTTATTTTTTATGTTTT-TCTTTAGTAG---------------TTTTTTATTTCTATCTTTTTTT-TACGAAAAGTAT-TTTTATGCTTTTGCT--TTGATTTTGTCTGATATTTTTGTT----ATGGTTATGAGCTCATATTCGTTATGTACCAGTA--TAATAATATTAGTTATTTGTTAATCCCACTAATAA------AGTTCTAATTTTATTAATTCGATTCTAATTTTCGAATTTT-------TTAGTTTTTTTAATAT--AAAATA-AAAGAAAAGAGAAAGTTGTAA---TTTTATGCCTCTTAGAT-CTTCATTTCTATTTTAATCATTTCTATTTTAAATGGTAG-AAATTGAAACCTTTTTATTAAATATTTTATTAAATACAAATA-AAAAAATTTTTAAATCGTGG-AGGAAGGGGGGGCGGATGTAGCCAAGTGG
>TL23
CTGCTATTGA--GCCCCATCTACAAAT-GGATAA-TTCTGTC-TTAGTGGA-GACG-AGTTTTTGAAAATAACGG-AGAAATACCGACTCTCTTGCAAGAGAGTCGGTATTTCTCCGTTATTTTTTATGTTTT-TCTTTAGTAG---------------TTTTTTATTTCTATCTTTTTTT-TACGAAAAGTAT-TTTTATGCTTTTGCT--TTGATTTTGTCTGATATTTTTGTT----ATGGTTATGAGCTCATATTCGTTATGTACCAGTA--TAATAATATTAGTTATTTGTTAATCCCACTAATAA------AGTTCTAATTTTATTAATTCGATTCTAATTTTCGAATTTT-------TTAGTTTTTTTAATAT--AAAATA-AAAGAAAAGAGAAAGTTGTAA---TTTTATGCCTCTTAGAT-CTTCATTTCTATTTTAATCATTTCTATTTTAAATGGTAG-AAATTGAAACCTTTTTATTAAATATTTTATTAAATACAAATA-AAAAAATTTTTAAATCGTGG-AGGAAGGGGGGGCGGATGTAGCCAAGTGG

H23
>WM26
CTGCTATTGA--GCCCCATCTACAAAT-GGATAA-TTCTGTC-TTAGTGGA-GACG-AGTTTTTGAAAATAACGG-AGAAATACCGACTCTCTTGCAAGAGAGTCGGTATTTCTCCGTTATTTTTTATGTTTT-TCCTTAATAG---------------TTTTTTATTTCTATCTTTTTTT-TACGAAAAGTAT-TTTTATGCTTTTGCT--TTGATTTTGTCTGATATTTTTGTT----ATGGTTATGGGCTCATATTCGTTATGTACCAGTA--TAATAATATTAGTTATTTGTTAATCCCACTAATAA------AGTTCTAATTTTATTAATTCGATTCTAATTTTCGAATTTT-------TTAGTTTTTTTAATAT--AAAATA-AAAGAAAAGAGAAAGTTGTAA---TTTTATGCCTCTTAGAT-CTTCATTTCTATTTTAATCATTTCTATTTTAAATGGTAG-AAATTGAAACCTTTTTATTAAATATTTTATTAAATAGAAATA-AAAAAATTTTTAAATCGTGG-AGGAAGGGGGGGCGGATGTAGCCAAGTGG
>WM27
CTGCTATTGA--GCCCCATCTACAAAT-GGATAA-TTCTGTC-TTAGTGGA-GACG-AGTTTTTGAAAATAACGG-AGAAATACCGACTCTCTTGCAAGAGAGTCGGTATTTCTCCGTTATTTTTTATGTTTT-TCCTTAATAG---------------TTTTTTATTTCTATCTTTTTTT-TACGAAAAGTAT-TTTTATGCTTTTGCT--TTGATTTTGTCTGATATTTTTGTT----ATGGTTATGGGCTCATATTCGTTATGTACCAGTA--TAATAATATTAGTTATTTGTTAATCCCACTAATAA------AGTTCTAATTTTATTAATTCGATTCTAATTTTCGAATTTT-------TTAGTTTTTTTAATAT--AAAATA-AAAGAAAAGAGAAAGTTGTAA---TTTTATGCCTCTTAGAT-CTTCATTTCTATTTTAATCATTTCTATTTTAAATGGTAG-AAATTGAAACCTTTTTATTAAATATTTTATTAAATAGAAATA-AAAAAATTTTTAAATCGTGG-AGGAAGGGGGGGCGGATGTAGCCAAGTGG

H24
>YR03
CTGCTATTGA--GCCCCATCTACAAAT-GGATAA-TTCTGTC-TTAGTGGA-GACG-AGTTTTTGAAAATAACGG-AGAAATACCGACTCTCTTGCAAGAGAGTCGGTATTTCTCAGTTATTTTTTATGTTTT-TCTTTAGTAG---------------TTTTTTATTTCTATCTTTTTTT-TACGAAAAGTAT-TTTTATGCTTTTGCT--TTGATTTTGTCTGATATTTTTGTT----ATGGTTATGAGCTCATATTCGTTATGTACCAGTA--TAATAATATTAGTTATTTGTTAATCCCACTAATAA------AGTTCTAATTTTATTAATTCGATTCTAATTTTCGAATTTT-------TTAGTTTTTTTAATAT--AAAATA-AAAGAAAAGAGAAAGTTGTAA---TTTTATGCCTCTTAGAT-CTTCATTTCTAT---------------TTTAAATGGTAG-AAATTGAAACCTTTTTATTAAATATTTTATTAAATAGAAATA-AAAAAAATTTTAAATCGTGG-AGGAAGGGGGGGCGGATGTAGCCAAGTGG
>YR04
CTGCTATTGA--GCCCCATCTACAAAT-GGATAA-TTCTGTC-TTAGTGGA-GACG-AGTTTTTGAAAATAACGG-AGAAATACCGACTCTCTTGCAAGAGAGTCGGTATTTCTCAGTTATTTTTTATGTTTT-TCTTTAGTAG---------------TTTTTTATTTCTATCTTTTTTT-TACGAAAAGTAT-TTTTATGCTTTTGCT--TTGATTTTGTCTGATATTTTTGTT----ATGGTTATGAGCTCATATTCGTTATGTACCAGTA--TAATAATATTAGTTATTTGTTAATCCCACTAATAA------AGTTCTAATTTTATTAATTCGATTCTAATTTTCGAATTTT-------TTAGTTTTTTTAATAT--AAAATA-AAAGAAAAGAGAAAGTTGTAA---TTTTATGCCTCTTAGAT-CTTCATTTCTAT---------------TTTAAATGGTAG-AAATTGAAACCTTTTTATTAAATATTTTATTAAATAGAAATA-AAAAAAATTTTAAATCGTGG-AGGAAGGGGGGGCGGATGTAGCCAAGTGG

H25
>YR05
CTGCTATTGA--GCCCCATCTACAAAT-GGATAA-TTCTGTC-TTAGTGGA-GACGA-GTTTTTGAAAATAACGG-AGAAATACCGACTCTCTTGCAAGAGAGTCGGTATTTCTCAGTTATTTTTTATGTTTT-TCTTTAGTAG---------------TTTTTTATTTCTATCTTTTTTT-TACGAAAAGTAT-TTTTATGCTTTTGCT--TTGATTTTGTCTGATATTTTTGTT----ATGGTTATGGGCTCATATTCGTTATGTACCAGTA--TAATAATATTAGTTATTTGTTAATCCCACTAATAA------AGTTCTAATTTTATTAATTCGATTCTAATTTTCGAATTTT-------TTAGTTTTTTTAATAT--AAAATA-AAAGAAAAGAGAAAGTTGTAA---TTTTATGCCTCTTAGAT-CTTCATTTCTATTT---------------TAAATGGTAG-AAATTGAAACCTTTTTATTAAATATTTTATTAAATAGAAATA-AAAAAAATTTTAAATCTTGG-AGGAAGGGGGGGCGGATGTAGCCAAGTGG
>PW01
CTGCTATTGA--GCCCCATCTACAAAT-GGATAA-TTCTGTC-TTAGTGGA-GACGA-GTTTTTGAAAATAACGG-AGAAATACCGACTCTCTTGCAAGAGAGTCGGTATTTCTCAGTTATTTTTTATGTTTT-TCTTTAGTAG---------------TTTTTTATTTCTATCTTTTTTT-TACGAAAAGTAT-TTTTATGCTTTTGCT--TTGATTTTGTCTGATATTTTTGTT----ATGGTTATGGGCTCATATTCGTTATGTACCAGTA--TAATAATATTAGTTATTTGTTAATCCCACTAATAA------AGTTCTAATTTTATTAATTCGATTCTAATTTTCGAATTTT-------TTAGTTTTTTTAATAT--AAAATA-AAAGAAAAGAGAAAGTTGTAA---TTTTATGCCTCTTAGAT-CTTCATTTCTATTT---------------TAAATGGTAG-AAATTGAAACCTTTTTATTAAATATTTTATTAAATAGAAATA-AAAAAAATTTTAAATCTTGG-AGGAAGGGGGGGCGGATGTAGCCAAGTGG
>PW03
CTGCTATTGA--GCCCCATCTACAAAT-GGATAA-TTCTGTC-TTAGTGGA-GACGA-GTTTTTGAAAATAACGG-AGAAATACCGACTCTCTTGCAAGAGAGTCGGTATTTCTCAGTTATTTTTTATGTTTT-TCTTTAGTAG---------------TTTTTTATTTCTATCTTTTTTT-TACGAAAAGTAT-TTTTATGCTTTTGCT--TTGATTTTGTCTGATATTTTTGTT----ATGGTTATGGGCTCATATTCGTTATGTACCAGTA--TAATAATATTAGTTATTTGTTAATCCCACTAATAA------AGTTCTAATTTTATTAATTCGATTCTAATTTTCGAATTTT-------TTAGTTTTTTTAATAT--AAAATA-AAAGAAAAGAGAAAGTTGTAA---TTTTATGCCTCTTAGAT-CTTCATTTCTATTT---------------TAAATGGTAG-AAATTGAAACCTTTTTATTAAATATTTTATTAAATAGAAATA-AAAAAAATTTTAAATCTTGG-AGGAAGGGGGGGCGGATGTAGCCAAGTGG

H26
>XN04
CTGCTATTGA--GCCCCATCTACAAAT-GGATAA-TTCTGTC-TTAGTGGA-GACG-AGTTTTTGAAAATAACGG-AGAAATACCGACTCTCTTGCAAGAGAGTCGGTATTTCTCCGTTATTTTTTATGTTTT-TCTTTAGTAG---------------TTTTTTATTTCTATCCTTTTTT-TG-GGGCTTTAT-TTTTATGCTTTTGCT--TTGATTTTGTCTGATATTTTTGTT----ATGGTTATGGGCTCATATTCGTTATGTACCAGTA--TAATAATATTAGTTATTTGTTAATCCCACTAATAA------AGTTCTAATTTTATTAATTCGATTCTAATTTTCGAATTTT-------TTAGTTTTTTTAATAG--AAAATA-AAAGAAAAGAGAAAGTTGTAA---TTTTATGCCTCTTAGAT-CTTCATTTCTATTT---------------TAAATGGTAG-AAATTGAAACCTTTTTATTAAATATTTTATTAAATAGAAATA-AAAAAAATTTTAAATCGTGG-AGGAAGGGGGGGCGGATGTAGCCAAGTGG
>NP01
CTGCTATTGA--GCCCCATCTACAAAT-GGATAA-TTCTGTC-TTAGTGGA-GACG-AGTTTTTGAAAATAACGG-AGAAATACCGACTCTCTTGCAAGAGAGTCGGTATTTCTCCGTTATTTTTTATGTTTT-TCTTTAGTAG---------------TTTTTTATTTCTATCCTTTTTT-TG-GGGCTTTAT-TTTTATGCTTTTGCT--TTGATTTTGTCTGATATTTTTGTT----ATGGTTATGGGCTCATATTCGTTATGTACCAGTA--TAATAATATTAGTTATTTGTTAATCCCACTAATAA------AGTTCTAATTTTATTAATTCGATTCTAATTTTCGAATTTT-------TTAGTTTTTTTAATAG--AAAATA-AAAGAAAAGAGAAAGTTGTAA---TTTTATGCCTCTTAGAT-CTTCATTTCTATTT---------------TAAATGGTAG-AAATTGAAACCTTTTTATTAAATATTTTATTAAATAGAAATA-AAAAAAATTTTAAATCGTGG-AGGAAGGGGGGGCGGATGTAGCCAAGTGG

H27
>XN07
CTGCTATTGA--GCCCCATCTACAAAT-GGATAA-TTCTGTC-TTAGTGGA-GACG-AGTTTTTGAAAATAACGG-AGAAATACCGACTCTCTTGCAAGAGAGTCGGTATTTCTCAGTTATTTTTTATGTTTT-TCTTTAGTAG---------------TTTTTTATTTCTATCCTTTTTT-TG-GAAAAGTAT-TTTTATGCTTTTGCT--TTGATTTTGTCTGATATTTTTGTT----ATGGTTATGGGCTCATATTCGTTATGTACCAGTA--TAATAATATTAGTTATTTGTTAATCCCACTAATAA------AGTTCTAATTTTATTAATTCGATTCTAATTTTCGAATTTT-------TTAGTTTTTTTAATAG--AAAATA-AAAGAAAAGAGAAAGTTGTAA---TTTTATGCCTCTTAGAT-CTTCATTTCTATTT---------------TAAATGGTAG-AAATTGAAACCTTTTTATTAAATATTTTATTAAATAGAAATA-AAAAAAATTTTAAATCGTGG-AGGAAGGGGGGGCGGATGTAGCCAAGTGG
>JL05
CTGCTATTGA--GCCCCATCTACAAAT-GGATAA-TTCTGTC-TTAGTGGA-GACG-AGTTTTTGAAAATAACGG-AGAAATACCGACTCTCTTGCAAGAGAGTCGGTATTTCTCAGTTATTTTTTATGTTTT-TCTTTAGTAG---------------TTTTTTATTTCTATCCTTTTTT-TG-GAAAAGTAT-TTTTATGCTTTTGCT--TTGATTTTGTCTGATATTTTTGTT----ATGGTTATGGGCTCATATTCGTTATGTACCAGTA--TAATAATATTAGTTATTTGTTAATCCCACTAATAA------AGTTCTAATTTTATTAATTCGATTCTAATTTTCGAATTTT-------TTAGTTTTTTTAATAG--AAAATA-AAAGAAAAGAGAAAGTTGTAA---TTTTATGCCTCTTAGAT-CTTCATTTCTATTT---------------TAAATGGTAG-AAATTGAAACCTTTTTATTAAATATTTTATTAAATAGAAATA-AAAAAAATTTTAAATCGTGG-AGGAAGGGGGGGCGGATGTAGCCAAGTGG
>JL06
CTGCTATTGA--GCCCCATCTACAAAT-GGATAA-TTCTGTC-TTAGTGGA-GACG-AGTTTTTGAAAATAACGG-AGAAATACCGACTCTCTTGCAAGAGAGTCGGTATTTCTCAGTTATTTTTTATGTTTT-TCTTTAGTAG---------------TTTTTTATTTCTATCCTTTTTT-TG-GAAAAGTAT-TTTTATGCTTTTGCT--TTGATTTTGTCTGATATTTTTGTT----ATGGTTATGGGCTCATATTCGTTATGTACCAGTA--TAATAATATTAGTTATTTGTTAATCCCACTAATAA------AGTTCTAATTTTATTAATTCGATTCTAATTTTCGAATTTT-------TTAGTTTTTTTAATAG--AAAATA-AAAGAAAAGAGAAAGTTGTAA---TTTTATGCCTCTTAGAT-CTTCATTTCTATTT---------------TAAATGGTAG-AAATTGAAACCTTTTTATTAAATATTTTATTAAATAGAAATA-AAAAAAATTTTAAATCGTGG-AGGAAGGGGGGGCGGATGTAGCCAAGTGG
>JL08
CTGCTATTGA--GCCCCATCTACAAAT-GGATAA-TTCTGTC-TTAGTGGA-GACG-AGTTTTTGAAAATAACGG-AGAAATACCGACTCTCTTGCAAGAGAGTCGGTATTTCTCAGTTATTTTTTATGTTTT-TCTTTAGTAG---------------TTTTTTATTTCTATCCTTTTTT-TG-GAAAAGTAT-TTTTATGCTTTTGCT--TTGATTTTGTCTGATATTTTTGTT----ATGGTTATGGGCTCATATTCGTTATGTACCAGTA--TAATAATATTAGTTATTTGTTAATCCCACTAATAA------AGTTCTAATTTTATTAATTCGATTCTAATTTTCGAATTTT-------TTAGTTTTTTTAATAG--AAAATA-AAAGAAAAGAGAAAGTTGTAA---TTTTATGCCTCTTAGAT-CTTCATTTCTATTT---------------TAAATGGTAG-AAATTGAAACCTTTTTATTAAATATTTTATTAAATAGAAATA-AAAAAAATTTTAAATCGTGG-AGGAAGGGGGGGCGGATGTAGCCAAGTGG

H28
>XN08
CTGCTATTGA--GCCCCATCTACAAAT-GGATAA-TTCTGTC-TTAGTGGA-GACG-AGTTTTTGAAAATAACGG-AGAAATACCGACTCTCTTGCAAGAGAGTCGGTATTTCTCAGTTATTTTTTATGTTTT-TCTTTAGTAG---------------TTTTTTATTTCTATCCTTTTTT-TG-GGGCAGTAT-TTTTATGCTTTTGCT--TTGATTTTGTCTGATATTTTTGTT----ATGGTTATGGGCTCATATTCGTTATGTACCAGTA--TAATAATATTAGTTATTTGTTAATCCCACTAATAA------AGTTCTAATTTTATTAATTCGATTCTAATTTTCGAATTTT-------TTAGTTTTTTTAATAG--AAAATA-AAAGAAAAGAGAAAGTTGTAA---TTTTATGCCTCTTAGAT-CTTCATTTCTATTT---------------TAAATGGTAG-AAATTGAAACCTTTTTATTAAATATTTTATTAAATAGAAATA-AAAAAAATTTTAAATCGTGG-AGGAAGGGGGGGCGGATGTAGCCAAGTGG
>NP05
CTGCTATTGA--GCCCCATCTACAAAT-GGATAA-TTCTGTC-TTAGTGGA-GACG-AGTTTTTGAAAATAACGG-AGAAATACCGACTCTCTTGCAAGAGAGTCGGTATTTCTCAGTTATTTTTTATGTTTT-TCTTTAGTAG---------------TTTTTTATTTCTATCCTTTTTT-TG-GGGCAGTAT-TTTTATGCTTTTGCT--TTGATTTTGTCTGATATTTTTGTT----ATGGTTATGGGCTCATATTCGTTATGTACCAGTA--TAATAATATTAGTTATTTGTTAATCCCACTAATAA------AGTTCTAATTTTATTAATTCGATTCTAATTTTCGAATTTT-------TTAGTTTTTTTAATAG--AAAATA-AAAGAAAAGAGAAAGTTGTAA---TTTTATGCCTCTTAGAT-CTTCATTTCTATTT---------------TAAATGGTAG-AAATTGAAACCTTTTTATTAAATATTTTATTAAATAGAAATA-AAAAAAATTTTAAATCGTGG-AGGAAGGGGGGGCGGATGTAGCCAAGTGG
>NP10
CTGCTATTGA--GCCCCATCTACAAAT-GGATAA-TTCTGTC-TTAGTGGA-GACG-AGTTTTTGAAAATAACGG-AGAAATACCGACTCTCTTGCAAGAGAGTCGGTATTTCTCAGTTATTTTTTATGTTTT-TCTTTAGTAG---------------TTTTTTATTTCTATCCTTTTTT-TG-GGGCAGTAT-TTTTATGCTTTTGCT--TTGATTTTGTCTGATATTTTTGTT----ATGGTTATGGGCTCATATTCGTTATGTACCAGTA--TAATAATATTAGTTATTTGTTAATCCCACTAATAA------AGTTCTAATTTTATTAATTCGATTCTAATTTTCGAATTTT-------TTAGTTTTTTTAATAG--AAAATA-AAAGAAAAGAGAAAGTTGTAA---TTTTATGCCTCTTAGAT-CTTCATTTCTATTT---------------TAAATGGTAG-AAATTGAAACCTTTTTATTAAATATTTTATTAAATAGAAATA-AAAAAAATTTTAAATCGTGG-AGGAAGGGGGGGCGGATGTAGCCAAGTGG
>JL10
CTGCTATTGA--GCCCCATCTACAAAT-GGATAA-TTCTGTC-TTAGTGGA-GACG-AGTTTTTGAAAATAACGG-AGAAATACCGACTCTCTTGCAAGAGAGTCGGTATTTCTCAGTTATTTTTTATGTTTT-TCTTTAGTAG---------------TTTTTTATTTCTATCCTTTTTT-TG-GGGCAGTAT-TTTTATGCTTTTGCT--TTGATTTTGTCTGATATTTTTGTT----ATGGTTATGGGCTCATATTCGTTATGTACCAGTA--TAATAATATTAGTTATTTGTTAATCCCACTAATAA------AGTTCTAATTTTATTAATTCGATTCTAATTTTCGAATTTT-------TTAGTTTTTTTAATAG--AAAATA-AAAGAAAAGAGAAAGTTGTAA---TTTTATGCCTCTTAGAT-CTTCATTTCTATTT---------------TAAATGGTAG-AAATTGAAACCTTTTTATTAAATATTTTATTAAATAGAAATA-AAAAAAATTTTAAATCGTGG-AGGAAGGGGGGGCGGATGTAGCCAAGTGG
>JL13
CTGCTATTGA--GCCCCATCTACAAAT-GGATAA-TTCTGTC-TTAGTGGA-GACG-AGTTTTTGAAAATAACGG-AGAAATACCGACTCTCTTGCAAGAGAGTCGGTATTTCTCAGTTATTTTTTATGTTTT-TCTTTAGTAG---------------TTTTTTATTTCTATCCTTTTTT-TG-GGGCAGTAT-TTTTATGCTTTTGCT--TTGATTTTGTCTGATATTTTTGTT----ATGGTTATGGGCTCATATTCGTTATGTACCAGTA--TAATAATATTAGTTATTTGTTAATCCCACTAATAA------AGTTCTAATTTTATTAATTCGATTCTAATTTTCGAATTTT-------TTAGTTTTTTTAATAG--AAAATA-AAAGAAAAGAGAAAGTTGTAA---TTTTATGCCTCTTAGAT-CTTCATTTCTATTT---------------TAAATGGTAG-AAATTGAAACCTTTTTATTAAATATTTTATTAAATAGAAATA-AAAAAAATTTTAAATCGTGG-AGGAAGGGGGGGCGGATGTAGCCAAGTGG

H29
>YR09
CTGCTATTGA--GCCCCATCTACAAAT-GGATAA-TTCTGTC-TTAGTGGA-GACG-AGTTTTTGAAAATAACGG-AGAAATACCGACTCTCTTGCAAGAGAGTCGGTATTTCTCCGTTATTTTTTATGTTTT-TCTTTAGTAG---------------TTTTTTATTTCTATCTTTTTTT-TACGAAAAGTAT-TTTTATGCTTTTGCT--TTTATTTTGTCTGATATTTTTGTT----ATGGTTATGGGCTCATATTCGTTATGTACCAGTA--TAATAATATTAGTTATTTGTTAATCCCACTAATAA------AGTTCTAATTTTATTAATTCGATTCTAATTTTCGAATTTT-------TTAGTTTTTTTAATAT--AAAATA-AAAGAAAAGAGAAAGTTGTAA---TTTTATGCCTCTTAAAT-CTTCATTTCTAT---------------TTTAAATGGTAG-AAATTGAAACCTTTTTATTAAATATTTTATTAAATACAAATA-AAAAAAATTTTAAATCGTGG-AGGAAGGGGGGGCGGATGTAGCCAAGTGG
>YR14
CTGCTATTGA--GCCCCATCTACAAAT-GGATAA-TTCTGTC-TTAGTGGA-GACG-AGTTTTTGAAAATAACGG-AGAAATACCGACTCTCTTGCAAGAGAGTCGGTATTTCTCCGTTATTTTTTATGTTTT-TCTTTAGTAG---------------TTTTTTATTTCTATCTTTTTTT-TACGAAAAGTAT-TTTTATGCTTTTGCT--TTTATTTTGTCTGATATTTTTGTT----ATGGTTATGGGCTCATATTCGTTATGTACCAGTA--TAATAATATTAGTTATTTGTTAATCCCACTAATAA------AGTTCTAATTTTATTAATTCGATTCTAATTTTCGAATTTT-------TTAGTTTTTTTAATAT--AAAATA-AAAGAAAAGAGAAAGTTGTAA---TTTTATGCCTCTTAAAT-CTTCATTTCTAT---------------TTTAAATGGTAG-AAATTGAAACCTTTTTATTAAATATTTTATTAAATACAAATA-AAAAAAATTTTAAATCGTGG-AGGAAGGGGGGGCGGATGTAGCCAAGTGG
>YR16
CTGCTATTGA--GCCCCATCTACAAAT-GGATAA-TTCTGTC-TTAGTGGA-GACG-AGTTTTTGAAAATAACGG-AGAAATACCGACTCTCTTGCAAGAGAGTCGGTATTTCTCCGTTATTTTTTATGTTTT-TCTTTAGTAG---------------TTTTTTATTTCTATCTTTTTTT-TACGAAAAGTAT-TTTTATGCTTTTGCT--TTTATTTTGTCTGATATTTTTGTT----ATGGTTATGGGCTCATATTCGTTATGTACCAGTA--TAATAATATTAGTTATTTGTTAATCCCACTAATAA------AGTTCTAATTTTATTAATTCGATTCTAATTTTCGAATTTT-------TTAGTTTTTTTAATAT--AAAATA-AAAGAAAAGAGAAAGTTGTAA---TTTTATGCCTCTTAAAT-CTTCATTTCTAT---------------TTTAAATGGTAG-AAATTGAAACCTTTTTATTAAATATTTTATTAAATACAAATA-AAAAAAATTTTAAATCGTGG-AGGAAGGGGGGGCGGATGTAGCCAAGTGG
>YR18
CTGCTATTGA--GCCCCATCTACAAAT-GGATAA-TTCTGTC-TTAGTGGA-GACG-AGTTTTTGAAAATAACGG-AGAAATACCGACTCTCTTGCAAGAGAGTCGGTATTTCTCCGTTATTTTTTATGTTTT-TCTTTAGTAG---------------TTTTTTATTTCTATCTTTTTTT-TACGAAAAGTAT-TTTTATGCTTTTGCT--TTTATTTTGTCTGATATTTTTGTT----ATGGTTATGGGCTCATATTCGTTATGTACCAGTA--TAATAATATTAGTTATTTGTTAATCCCACTAATAA------AGTTCTAATTTTATTAATTCGATTCTAATTTTCGAATTTT-------TTAGTTTTTTTAATAT--AAAATA-AAAGAAAAGAGAAAGTTGTAA---TTTTATGCCTCTTAAAT-CTTCATTTCTAT---------------TTTAAATGGTAG-AAATTGAAACCTTTTTATTAAATATTTTATTAAATACAAATA-AAAAAAATTTTAAATCGTGG-AGGAAGGGGGGGCGGATGTAGCCAAGTGG
>YR19
CTGCTATTGA--GCCCCATCTACAAAT-GGATAA-TTCTGTC-TTAGTGGA-GACG-AGTTTTTGAAAATAACGG-AGAAATACCGACTCTCTTGCAAGAGAGTCGGTATTTCTCCGTTATTTTTTATGTTTT-TCTTTAGTAG---------------TTTTTTATTTCTATCTTTTTTT-TACGAAAAGTAT-TTTTATGCTTTTGCT--TTTATTTTGTCTGATATTTTTGTT----ATGGTTATGGGCTCATATTCGTTATGTACCAGTA--TAATAATATTAGTTATTTGTTAATCCCACTAATAA------AGTTCTAATTTTATTAATTCGATTCTAATTTTCGAATTTT-------TTAGTTTTTTTAATAT--AAAATA-AAAGAAAAGAGAAAGTTGTAA---TTTTATGCCTCTTAAAT-CTTCATTTCTAT---------------TTTAAATGGTAG-AAATTGAAACCTTTTTATTAAATATTTTATTAAATACAAATA-AAAAAAATTTTAAATCGTGG-AGGAAGGGGGGGCGGATGTAGCCAAGTGG
>BS09
CTGCTATTGA--GCCCCATCTACAAAT-GGATAA-TTCTGTC-TTAGTGGA-GACG-AGTTTTTGAAAATAACGG-AGAAATACCGACTCTCTTGCAAGAGAGTCGGTATTTCTCCGTTATTTTTTATGTTTT-TCTTTAGTAG---------------TTTTTTATTTCTATCTTTTTTT-TACGAAAAGTAT-TTTTATGCTTTTGCT--TTTATTTTGTCTGATATTTTTGTT----ATGGTTATGGGCTCATATTCGTTATGTACCAGTA--TAATAATATTAGTTATTTGTTAATCCCACTAATAA------AGTTCTAATTTTATTAATTCGATTCTAATTTTCGAATTTT-------TTAGTTTTTTTAATAT--AAAATA-AAAGAAAAGAGAAAGTTGTAA---TTTTATGCCTCTTAAAT-CTTCATTTCTAT---------------TTTAAATGGTAG-AAATTGAAACCTTTTTATTAAATATTTTATTAAATACAAATA-AAAAAAATTTTAAATCGTGG-AGGAAGGGGGGGCGGATGTAGCCAAGTGG

H30
>YR17
CTGCTATTGA--GCCCCATCTACAAAT-GGATAA-TTCTGTC-TTAGTGGA-GACG-AGTTTTTGAAAATAACGG-AGAAATACCGACTCTCTTGCAAGAGAGTCGGTATTTCTCCGTTATTTTTTATGTTTT-TCTTTAGTAG---------------TTTTTTATTTCTATCTTTTTTT-TACGAAAAGTAT-TTTTATGCTTTTGCT--TTGATTTTGTCTGATATTTTTGTT----ATGGTTATGGGCTCATATTCGTTATGTACCAGTA--TAATAATATTAGTTATTTGTTAATCCCACTAATAA------AGTTCTAATTTTATTAATTCGATTCTAATTTTCGAATTTT-------TTAGTTTTTTTAATAT--AAAATA-AAAGAAAAGAGAAAGTTGTAA---TTTTATGCCTCTTAAAA-CTTCATTTCTAT---------------TTTAAATGGTAG-AAATTGAAACCTTTTTATTAAATATTTTATTAAATACAAATA-AAAAAAATTTTAAATCTTGG-AGGAAGGGGGGGCGGATGTAGCCAAGTGG
>BS05
CTGCTATTGA--GCCCCATCTACAAAT-GGATAA-TTCTGTC-TTAGTGGA-GACG-AGTTTTTGAAAATAACGG-AGAAATACCGACTCTCTTGCAAGAGAGTCGGTATTTCTCCGTTATTTTTTATGTTTT-TCTTTAGTAG---------------TTTTTTATTTCTATCTTTTTTT-TACGAAAAGTAT-TTTTATGCTTTTGCT--TTGATTTTGTCTGATATTTTTGTT----ATGGTTATGGGCTCATATTCGTTATGTACCAGTA--TAATAATATTAGTTATTTGTTAATCCCACTAATAA------AGTTCTAATTTTATTAATTCGATTCTAATTTTCGAATTTT-------TTAGTTTTTTTAATAT--AAAATA-AAAGAAAAGAGAAAGTTGTAA---TTTTATGCCTCTTAAAA-CTTCATTTCTAT---------------TTTAAATGGTAG-AAATTGAAACCTTTTTATTAAATATTTTATTAAATACAAATA-AAAAAAATTTTAAATCTTGG-AGGAAGGGGGGGCGGATGTAGCCAAGTGG

H31
>YR23
CTGCTATTGA--GCCCCATCTACAAAT-GGATAA-TTCTGTC-TTAGTGGA-GACG-AGTTTTTGAAAATAACGG-AGAAATACCGACTCTCTTGCAAGAGAGTCGGTATTTCTCCGTTATTTTTTATGTTTT-TCCTTAGTAG---------------TTTTTTATTTCTATCTTTTTTT-TACGAAAAGTAT-TTTTATGCTTTTGCT--TTGGTTT-GTCTGATATTTTTGTT----ATGGTTATGGGCTCATATTCGTTATGTACCAGTA--TAATAATATTAGTTATTTGTTAATCCCACTAATAA------AGTTCTAATTTTATTAATTCGATTCTAATTTTCGAATTTT-------TTAGTTTTTTTAATAT--AAAATA-AAAGAAAAGAGAAAGTTGTAA---TTTTATGCCTCTTAAAT-CTTCATTTCTATTTTA---------------AATGGTAG-AAATTGAAACCTTTTTATTAAATATTTTATTAAATAGAAATA-AAAAAAATTTTAAATCGTGG-AGGAAGGGGGGGCGGATGTAGCCAAGTGG
>PW02
CTGCTATTGA--GCCCCATCTACAAAT-GGATAA-TTCTGTC-TTAGTGGA-GACG-AGTTTTTGAAAATAACGG-AGAAATACCGACTCTCTTGCAAGAGAGTCGGTATTTCTCCGTTATTTTTTATGTTTT-TCCTTAGTAG---------------TTTTTTATTTCTATCTTTTTTT-TACGAAAAGTAT-TTTTATGCTTTTGCT--TTGGTTT-GTCTGATATTTTTGTT----ATGGTTATGGGCTCATATTCGTTATGTACCAGTA--TAATAATATTAGTTATTTGTTAATCCCACTAATAA------AGTTCTAATTTTATTAATTCGATTCTAATTTTCGAATTTT-------TTAGTTTTTTTAATAT--AAAATA-AAAGAAAAGAGAAAGTTGTAA---TTTTATGCCTCTTAAAT-CTTCATTTCTATTTTA---------------AATGGTAG-AAATTGAAACCTTTTTATTAAATATTTTATTAAATAGAAATA-AAAAAAATTTTAAATCGTGG-AGGAAGGGGGGGCGGATGTAGCCAAGTGG

H32
>NP04
CTGCTATTGA--GCCC-ATCTACAAAT-GGATAA-TTCTGTC-TTAGTGGA-GACG-AGTTTTTGAAAATAACGG-AGAAATACCGACTCTCTTGCAAGAGAGTCGGTATTTCTCCGTTATTTTTTATGTTTT-TCTTTAGTAG---------------TTTTTTATTTCTATCCTTTTTT-TG-GGGCTGTAT-TTTTATGCTTTTGCT--TTGATTTTGTCTGATATTTTTGTT----ATGGTTATGGGCTCATATTCGTTATGTACCAGTA--TAATAATATTAGTTATTTGTTAATCCCACTAATAA------AGTTCTAATTTTATTAATTCGATTCTAATTTTCGAATTTT-------TTAGTTTTTTTAATAG--AAAATA-AAAGAAAAGAGAAAGTTGTAA---TTTTATGCCTCTTAGAT-CTTCATTTCTATTT---------------TAAATGGTAG-AAATTGAAACCTTTTTATTAAATATTTTATTAAATAGAAATA-AAAAAAATTTTAAATCGTGG-AGGAAGGGGGGGCGGATGTAGCCAAGTGG
>JL03
CTGCTATTGA--GCCC-ATCTACAAAT-GGATAA-TTCTGTC-TTAGTGGA-GACG-AGTTTTTGAAAATAACGG-AGAAATACCGACTCTCTTGCAAGAGAGTCGGTATTTCTCCGTTATTTTTTATGTTTT-TCTTTAGTAG---------------TTTTTTATTTCTATCCTTTTTT-TG-GGGCTGTAT-TTTTATGCTTTTGCT--TTGATTTTGTCTGATATTTTTGTT----ATGGTTATGGGCTCATATTCGTTATGTACCAGTA--TAATAATATTAGTTATTTGTTAATCCCACTAATAA------AGTTCTAATTTTATTAATTCGATTCTAATTTTCGAATTTT-------TTAGTTTTTTTAATAG--AAAATA-AAAGAAAAGAGAAAGTTGTAA---TTTTATGCCTCTTAGAT-CTTCATTTCTATTT---------------TAAATGGTAG-AAATTGAAACCTTTTTATTAAATATTTTATTAAATAGAAATA-AAAAAAATTTTAAATCGTGG-AGGAAGGGGGGGCGGATGTAGCCAAGTGG

H33
>YR25
CTGCTATTGA--GCCCCATCTACAAAT-GGATAA-TTCTGTC-TTAGTGGA-GACG-AGTTTTTGAAAATAACGG-AGAAATACCGACTCTCTTGCAAGAGAGTCGGTATTTCTCAGTTATTTTTTATGTTTT-TCTTTAGTAG---------------TTTTTTATTTCTATCTTTTTTT-TACGAAAAGTAT-TTTTATGCTTTTGCT--TTGATTTTGTCTGATATTTTTGTT----ATGGTTATGGGCTCATATTCGTTATGTACCAGTA--TAATAATATTAGTTATTTGTTAATCCCACTAATAA------AGTTCTAATTTTATTAATTCGATTCTAATTTTCGAATTTT-------TTAGTTTTTTTAATAT--AAAATA-AAAGAAAAGAGAAAGTTGTAA---TTTTATGCCTCTTAAAT-CTTCATTTCTAT---------------TTTAAATGGTAG-AAATTGAAACCTTTTTATTAAATATTTTATTAAATAGAAATA-AAAAAAATTTTAAATCGTGG-AGGAAGGGGGGGCGGATGTAGCCAAGTGG
>BS04
CTGCTATTGA--GCCCCATCTACAAAT-GGATAA-TTCTGTC-TTAGTGGA-GACG-AGTTTTTGAAAATAACGG-AGAAATACCGACTCTCTTGCAAGAGAGTCGGTATTTCTCAGTTATTTTTTATGTTTT-TCTTTAGTAG---------------TTTTTTATTTCTATCTTTTTTT-TACGAAAAGTAT-TTTTATGCTTTTGCT--TTGATTTTGTCTGATATTTTTGTT----ATGGTTATGGGCTCATATTCGTTATGTACCAGTA--TAATAATATTAGTTATTTGTTAATCCCACTAATAA------AGTTCTAATTTTATTAATTCGATTCTAATTTTCGAATTTT-------TTAGTTTTTTTAATAT--AAAATA-AAAGAAAAGAGAAAGTTGTAA---TTTTATGCCTCTTAAAT-CTTCATTTCTAT---------------TTTAAATGGTAG-AAATTGAAACCTTTTTATTAAATATTTTATTAAATAGAAATA-AAAAAAATTTTAAATCGTGG-AGGAAGGGGGGGCGGATGTAGCCAAGTGG
>PW06
CTGCTATTGA--GCCCCATCTACAAAT-GGATAA-TTCTGTC-TTAGTGGA-GACG-AGTTTTTGAAAATAACGG-AGAAATACCGACTCTCTTGCAAGAGAGTCGGTATTTCTCAGTTATTTTTTATGTTTT-TCTTTAGTAG---------------TTTTTTATTTCTATCTTTTTTT-TACGAAAAGTAT-TTTTATGCTTTTGCT--TTGATTTTGTCTGATATTTTTGTT----ATGGTTATGGGCTCATATTCGTTATGTACCAGTA--TAATAATATTAGTTATTTGTTAATCCCACTAATAA------AGTTCTAATTTTATTAATTCGATTCTAATTTTCGAATTTT-------TTAGTTTTTTTAATAT--AAAATA-AAAGAAAAGAGAAAGTTGTAA---TTTTATGCCTCTTAAAT-CTTCATTTCTAT---------------TTTAAATGGTAG-AAATTGAAACCTTTTTATTAAATATTTTATTAAATAGAAATA-AAAAAAATTTTAAATCGTGG-AGGAAGGGGGGGCGGATGTAGCCAAGTGG
>PW13
CTGCTATTGA--GCCCCATCTACAAAT-GGATAA-TTCTGTC-TTAGTGGA-GACG-AGTTTTTGAAAATAACGG-AGAAATACCGACTCTCTTGCAAGAGAGTCGGTATTTCTCAGTTATTTTTTATGTTTT-TCTTTAGTAG---------------TTTTTTATTTCTATCTTTTTTT-TACGAAAAGTAT-TTTTATGCTTTTGCT--TTGATTTTGTCTGATATTTTTGTT----ATGGTTATGGGCTCATATTCGTTATGTACCAGTA--TAATAATATTAGTTATTTGTTAATCCCACTAATAA------AGTTCTAATTTTATTAATTCGATTCTAATTTTCGAATTTT-------TTAGTTTTTTTAATAT--AAAATA-AAAGAAAAGAGAAAGTTGTAA---TTTTATGCCTCTTAAAT-CTTCATTTCTAT---------------TTTAAATGGTAG-AAATTGAAACCTTTTTATTAAATATTTTATTAAATAGAAATA-AAAAAAATTTTAAATCGTGG-AGGAAGGGGGGGCGGATGTAGCCAAGTGG
>PW14
CTGCTATTGA--GCCCCATCTACAAAT-GGATAA-TTCTGTC-TTAGTGGA-GACG-AGTTTTTGAAAATAACGG-AGAAATACCGACTCTCTTGCAAGAGAGTCGGTATTTCTCAGTTATTTTTTATGTTTT-TCTTTAGTAG---------------TTTTTTATTTCTATCTTTTTTT-TACGAAAAGTAT-TTTTATGCTTTTGCT--TTGATTTTGTCTGATATTTTTGTT----ATGGTTATGGGCTCATATTCGTTATGTACCAGTA--TAATAATATTAGTTATTTGTTAATCCCACTAATAA------AGTTCTAATTTTATTAATTCGATTCTAATTTTCGAATTTT-------TTAGTTTTTTTAATAT--AAAATA-AAAGAAAAGAGAAAGTTGTAA---TTTTATGCCTCTTAAAT-CTTCATTTCTAT---------------TTTAAATGGTAG-AAATTGAAACCTTTTTATTAAATATTTTATTAAATAGAAATA-AAAAAAATTTTAAATCGTGG-AGGAAGGGGGGGCGGATGTAGCCAAGTGG
>PW18
CTGCTATTGA--GCCCCATCTACAAAT-GGATAA-TTCTGTC-TTAGTGGA-GACG-AGTTTTTGAAAATAACGG-AGAAATACCGACTCTCTTGCAAGAGAGTCGGTATTTCTCAGTTATTTTTTATGTTTT-TCTTTAGTAG---------------TTTTTTATTTCTATCTTTTTTT-TACGAAAAGTAT-TTTTATGCTTTTGCT--TTGATTTTGTCTGATATTTTTGTT----ATGGTTATGGGCTCATATTCGTTATGTACCAGTA--TAATAATATTAGTTATTTGTTAATCCCACTAATAA------AGTTCTAATTTTATTAATTCGATTCTAATTTTCGAATTTT-------TTAGTTTTTTTAATAT--AAAATA-AAAGAAAAGAGAAAGTTGTAA---TTTTATGCCTCTTAAAT-CTTCATTTCTAT---------------TTTAAATGGTAG-AAATTGAAACCTTTTTATTAAATATTTTATTAAATAGAAATA-AAAAAAATTTTAAATCGTGG-AGGAAGGGGGGGCGGATGTAGCCAAGTGG

H34
>LD03
CTGCTATTGA--GCCCCATCTACAAAT-GGATAA-TTCTGTC-TTAGTGGA-GACG-AGTTTTTGAAAATAACGG-AGAAATACCGACTCTCTTGCAAGAGAGTCGGTATTTCTCCGTTATTTTTTATGTTTT-TCTTTAGTAG---------------TTTTTTATTTCTATCTTTTTTT-TACGAAAAGTAT-TTTTATGCTTTTGCT--TTTATTTTGTCTGATATTTTTGTT----ATGGTTATGGGCTCATATTCGTTATGTACCAGTA--TAATAATATTAGTTATTTGTTAATCCCACTAATAA------AGTTCTAATTTTATTAATTCGATTCTAATTTTCGAATTTT-------TTAGTTTTTTTAATAT--AAAATA-AAAGAAAAGAGAAAGTTGTAA---TTTTATGCCTCTTAGAT-CTTCATTTCTATTTTAATCATTTCTATTTTAAATGGTAG-AAATTGAAACCTTTTTATTAAAAATTTTATTAAATAGAAATA-AAAAAATTTTTAAATCGTGG-AGGAAGGGGGGGCGGATGTAGCCAAGTGG
>TL25
CTGCTATTGA--GCCCCATCTACAAAT-GGATAA-TTCTGTC-TTAGTGGA-GACG-AGTTTTTGAAAATAACGG-AGAAATACCGACTCTCTTGCAAGAGAGTCGGTATTTCTCCGTTATTTTTTATGTTTT-TCTTTAGTAG---------------TTTTTTATTTCTATCTTTTTTT-TACGAAAAGTAT-TTTTATGCTTTTGCT--TTTATTTTGTCTGATATTTTTGTT----ATGGTTATGGGCTCATATTCGTTATGTACCAGTA--TAATAATATTAGTTATTTGTTAATCCCACTAATAA------AGTTCTAATTTTATTAATTCGATTCTAATTTTCGAATTTT-------TTAGTTTTTTTAATAT--AAAATA-AAAGAAAAGAGAAAGTTGTAA---TTTTATGCCTCTTAGAT-CTTCATTTCTATTTTAATCATTTCTATTTTAAATGGTAG-AAATTGAAACCTTTTTATTAAAAATTTTATTAAATAGAAATA-AAAAAATTTTTAAATCGTGG-AGGAAGGGGGGGCGGATGTAGCCAAGTGG

H35
>JL02
CTGCTATTGA--GCCCCATCTACAAAT-GGATAA-TTCTGTC-TTAGTGGA-GACG-AGTTTTTGAAAATAACGG-AGAAATACCGACTCTCTTGCAAGAGAGTCGGTATTTCTCCGTTATTTTTTATGTTTT-TCTTTAGTAG---------------TTTTTTATTTCTATCCTTTTTT-TG-GGGCAGTAT-TTTTATGCTTTTGCT--TTGATTTTGTCTGATATTTTTGTT----ATGGTTATGGGCTCATATTCGTTATGTACCAGTA--TAATAATATTAGTTATTTGTTAATCCCACTAATAA------AGTTCTAATTTTATTAATTCGATTCTAATTTTCGAATTTT-------TTAGTTTTTTTAATAG--AAAATA-AAAGAAAAGAGAAAGTTGTAA---TTTTATGCCTCTTAGAT-CTTCATTTCTATTT---------------TAAATGGTAG-AAATTGAAACCTTTTTATTAAATATTTTATTAAATAGAAATA-AAAAAAATTTTAAATCGTGG-AGGAAGGGGGGGCGGATGTAGCCAAGTGG
>JL04
CTGCTATTGA--GCCCCATCTACAAAT-GGATAA-TTCTGTC-TTAGTGGA-GACG-AGTTTTTGAAAATAACGG-AGAAATACCGACTCTCTTGCAAGAGAGTCGGTATTTCTCCGTTATTTTTTATGTTTT-TCTTTAGTAG---------------TTTTTTATTTCTATCCTTTTTT-TG-GGGCAGTAT-TTTTATGCTTTTGCT--TTGATTTTGTCTGATATTTTTGTT----ATGGTTATGGGCTCATATTCGTTATGTACCAGTA--TAATAATATTAGTTATTTGTTAATCCCACTAATAA------AGTTCTAATTTTATTAATTCGATTCTAATTTTCGAATTTT-------TTAGTTTTTTTAATAG--AAAATA-AAAGAAAAGAGAAAGTTGTAA---TTTTATGCCTCTTAGAT-CTTCATTTCTATTT---------------TAAATGGTAG-AAATTGAAACCTTTTTATTAAATATTTTATTAAATAGAAATA-AAAAAAATTTTAAATCGTGG-AGGAAGGGGGGGCGGATGTAGCCAAGTGG
>JL15
CTGCTATTGA--GCCCCATCTACAAAT-GGATAA-TTCTGTC-TTAGTGGA-GACG-AGTTTTTGAAAATAACGG-AGAAATACCGACTCTCTTGCAAGAGAGTCGGTATTTCTCCGTTATTTTTTATGTTTT-TCTTTAGTAG---------------TTTTTTATTTCTATCCTTTTTT-TG-GGGCAGTAT-TTTTATGCTTTTGCT--TTGATTTTGTCTGATATTTTTGTT----ATGGTTATGGGCTCATATTCGTTATGTACCAGTA--TAATAATATTAGTTATTTGTTAATCCCACTAATAA------AGTTCTAATTTTATTAATTCGATTCTAATTTTCGAATTTT-------TTAGTTTTTTTAATAG--AAAATA-AAAGAAAAGAGAAAGTTGTAA---TTTTATGCCTCTTAGAT-CTTCATTTCTATTT---------------TAAATGGTAG-AAATTGAAACCTTTTTATTAAATATTTTATTAAATAGAAATA-AAAAAAATTTTAAATCGTGG-AGGAAGGGGGGGCGGATGTAGCCAAGTGG
>JL16
CTGCTATTGA--GCCCCATCTACAAAT-GGATAA-TTCTGTC-TTAGTGGA-GACG-AGTTTTTGAAAATAACGG-AGAAATACCGACTCTCTTGCAAGAGAGTCGGTATTTCTCCGTTATTTTTTATGTTTT-TCTTTAGTAG---------------TTTTTTATTTCTATCCTTTTTT-TG-GGGCAGTAT-TTTTATGCTTTTGCT--TTGATTTTGTCTGATATTTTTGTT----ATGGTTATGGGCTCATATTCGTTATGTACCAGTA--TAATAATATTAGTTATTTGTTAATCCCACTAATAA------AGTTCTAATTTTATTAATTCGATTCTAATTTTCGAATTTT-------TTAGTTTTTTTAATAG--AAAATA-AAAGAAAAGAGAAAGTTGTAA---TTTTATGCCTCTTAGAT-CTTCATTTCTATTT---------------TAAATGGTAG-AAATTGAAACCTTTTTATTAAATATTTTATTAAATAGAAATA-AAAAAAATTTTAAATCGTGG-AGGAAGGGGGGGCGGATGTAGCCAAGTGG
>XE01
CTGCTATTGA--GCCCCATCTACAAAT-GGATAA-TTCTGTC-TTAGTGGA-GACG-AGTTTTTGAAAATAACGG-AGAAATACCGACTCTCTTGCAAGAGAGTCGGTATTTCTCCGTTATTTTTTATGTTTT-TCTTTAGTAG---------------TTTTTTATTTCTATCCTTTTTT-TG-GGGCAGTAT-TTTTATGCTTTTGCT--TTGATTTTGTCTGATATTTTTGTT----ATGGTTATGGGCTCATATTCGTTATGTACCAGTA--TAATAATATTAGTTATTTGTTAATCCCACTAATAA------AGTTCTAATTTTATTAATTCGATTCTAATTTTCGAATTTT-------TTAGTTTTTTTAATAG--AAAATA-AAAGAAAAGAGAAAGTTGTAA---TTTTATGCCTCTTAGAT-CTTCATTTCTATTT---------------TAAATGGTAG-AAATTGAAACCTTTTTATTAAATATTTTATTAAATAGAAATA-AAAAAAATTTTAAATCGTGG-AGGAAGGGGGGGCGGATGTAGCCAAGTGG

H36
>TL05
CTGCTATTGA--GCCCCATCTACAAAT-GGATAA-TTCTGTC-TTAGTGGA-GACG-AGTTTTTGAAAATAACGG-AGAAATACCGACTCTCTTGCAAGAGAGTCGGTATTTCTCCGTTATTTTTTATGTTTT-TCTTTAGTAG---------------TTTTTTATTTCTATCTTTTTTT-TG-GGGCAGTAT-TTTTATGCTTTTGCT--TTGGAAGTGTCTGATATTTTTGTT----ATGGTTATGGGCTCATATTCGTTATGTACCAGTA--TAATAATATTAGTTATTTGTTAATCCCACTAATAA------AGTTCTAATTTTATTAATTCGATTCTAATTTTCGAATTTT-------TTAGTTTTTTTAATAT--AAAATA-AAAGAAAAGAGAAAGTTGTAA---TTTTATGCCTCTTAGAT-CTTCATTTCTATTTTAATCATTTCTATTTTAAATGGTAG-AAATTGAAACCTTTTTATTAAAAATTTTATTAAATACAAATA-AAAAAATTTTTAAATCGTGG-AGGAAGGGGGGGCGGATGTAGCCAAGTGG
>TL13
CTGCTATTGA--GCCCCATCTACAAAT-GGATAA-TTCTGTC-TTAGTGGA-GACG-AGTTTTTGAAAATAACGG-AGAAATACCGACTCTCTTGCAAGAGAGTCGGTATTTCTCCGTTATTTTTTATGTTTT-TCTTTAGTAG---------------TTTTTTATTTCTATCTTTTTTT-TG-GGGCAGTAT-TTTTATGCTTTTGCT--TTGGAAGTGTCTGATATTTTTGTT----ATGGTTATGGGCTCATATTCGTTATGTACCAGTA--TAATAATATTAGTTATTTGTTAATCCCACTAATAA------AGTTCTAATTTTATTAATTCGATTCTAATTTTCGAATTTT-------TTAGTTTTTTTAATAT--AAAATA-AAAGAAAAGAGAAAGTTGTAA---TTTTATGCCTCTTAGAT-CTTCATTTCTATTTTAATCATTTCTATTTTAAATGGTAG-AAATTGAAACCTTTTTATTAAAAATTTTATTAAATACAAATA-AAAAAATTTTTAAATCGTGG-AGGAAGGGGGGGCGGATGTAGCCAAGTGG

H37
>TL24
CTGCTATTGA--GCCCCATCTACAAAT-GGATAA-TTCTGTC-TTAGTGGA-GACG-AGTTTTTGAAAATAACGG-AGAAATACCGACTCTCTTGCAAGAGAGTCGGTATTTCTCCGTTATTTTTTATGTTTT-TCTTTAGTAG---------------TTTTTTATTTCTATCTTTTTTT-TACGAAAAGTAT-TTTTATGCTTTTGCT--TTGATTTTGTCTGATATTTTTGTT----ATGGTTATGGGCTCATATTCGTTATGTACCAGTA--TAATAATATTAGTTATTTGTTAATCCCACTAATAA------AGTTCTAATTTTATTAATTCGATTCTAATTTTCGAATTTT-------TTAGTTTTTTTAATAT--AAAATA-AAAGAAAAGAGAAAGTTGTAA---TTTTATGCCTCTTAGAT-CTTCATTTCTATTTTAATCATTTCTATTTTAAATGGTAG-AAATTGAAACCTTTTTATTAAAAATTTTATTAAATACAAATA-AAAAAATTTTTAAATCTTGG-AGGAAGGGGGGGCGGATGTAGCCAAGTGG
>CH06
CTGCTATTGA--GCCCCATCTACAAAT-GGATAA-TTCTGTC-TTAGTGGA-GACG-AGTTTTTGAAAATAACGG-AGAAATACCGACTCTCTTGCAAGAGAGTCGGTATTTCTCCGTTATTTTTTATGTTTT-TCTTTAGTAG---------------TTTTTTATTTCTATCTTTTTTT-TACGAAAAGTAT-TTTTATGCTTTTGCT--TTGATTTTGTCTGATATTTTTGTT----ATGGTTATGGGCTCATATTCGTTATGTACCAGTA--TAATAATATTAGTTATTTGTTAATCCCACTAATAA------AGTTCTAATTTTATTAATTCGATTCTAATTTTCGAATTTT-------TTAGTTTTTTTAATAT--AAAATA-AAAGAAAAGAGAAAGTTGTAA---TTTTATGCCTCTTAGAT-CTTCATTTCTATTTTAATCATTTCTATTTTAAATGGTAG-AAATTGAAACCTTTTTATTAAAAATTTTATTAAATACAAATA-AAAAAATTTTTAAATCTTGG-AGGAAGGGGGGGCGGATGTAGCCAAGTGG

H38
>CH09
CTGCTATTGA--GCCCCATCTACAAAT-GGATAA-TTCTGTC-TTAGTGGA-GACG-AGTTTTTGAAAATAACGG-AGAAATACCGACTCTCTTGCAAGAGAGTCGGTATTTCTCCGTTATTTTTTATGTTTT-TCTTTAGTAG---------------TTTTTTATTTCTATCTTTTTTT-TACGGGCAGTAT-TTTTATGCTTTTGCT--TTGATTTTGTCTGATATTTTTGTT----ATGGTTATGGGCTCATATTCGTTATGTACCAGTA--TAATAATATTAGTTATTTGTTAATCCCACTAATAA------AGTTCTAATTTTATTAATTCGATTCTAATTTTCGAATTTT-------TTAGTTTTTTTAATAT--AAAATA-AAAGAAAAGAGAAAGTTGTAA---TTTTATGCCTCTTAGAT-CTTCATTTCTATTTTAATCATTTCTATTTTAAATGGTAG-AAATTGAAACCTTTTTATTAAAAAATTTATTAAACACAAATA-AAAAAATTTTTAAATCGTGG-AGGAAGGGGGGGCGGATGTAGCCAAGTGG
>CH10
CTGCTATTGA--GCCCCATCTACAAAT-GGATAA-TTCTGTC-TTAGTGGA-GACG-AGTTTTTGAAAATAACGG-AGAAATACCGACTCTCTTGCAAGAGAGTCGGTATTTCTCCGTTATTTTTTATGTTTT-TCTTTAGTAG---------------TTTTTTATTTCTATCTTTTTTT-TACGGGCAGTAT-TTTTATGCTTTTGCT--TTGATTTTGTCTGATATTTTTGTT----ATGGTTATGGGCTCATATTCGTTATGTACCAGTA--TAATAATATTAGTTATTTGTTAATCCCACTAATAA------AGTTCTAATTTTATTAATTCGATTCTAATTTTCGAATTTT-------TTAGTTTTTTTAATAT--AAAATA-AAAGAAAAGAGAAAGTTGTAA---TTTTATGCCTCTTAGAT-CTTCATTTCTATTTTAATCATTTCTATTTTAAATGGTAG-AAATTGAAACCTTTTTATTAAAAAATTTATTAAACACAAATA-AAAAAATTTTTAAATCGTGG-AGGAAGGGGGGGCGGATGTAGCCAAGTGG

H39
>HD11
CTGCTATTGA--GCCCCATCTACAAAT-GGATAA-TTCTGTC-TTAGTAGA-GACG-AGTTTTTGAAAATAACGG-AGAAATACCGACTCTCTTGCAAGAGAGTCGGTATTTCTCCGTTATTTTTTATGTTTT-TCTTTAGTAG---------------TTTTTTATTTCTATCTTTTTTT-TACGAAAAGTAT-TTTTATGCTTTTGCT--TTTATTTTGTCTGATATTTTTGTT----ATGGTTATGAGCTCATATTCGTTATGTACCAGTA--TAATAATATTAGTTATTTGTTAATCCCACTAATAA------AGTTCTAATTTTATTAATTCGATTCTAATTTTCGAATTTT-------TTAGTTTTTTTAATAT--AAAATA-AAAGAAAAGAGAAAGTTGTAA---TTTTATGCCTCTTAAAT-CTTCATTTCTAT---------------TTTAAATGGTAG-AAATTGAAACCTTTTTATTAAATATTTTATTAAATACAAATA-AAAAAAATTTTAAATCTTGG-AGGAAGGGGGGGCGGATGTAGCCAAGTGG
>HD15
CTGCTATTGA--GCCCCATCTACAAAT-GGATAA-TTCTGTC-TTAGTAGA-GACG-AGTTTTTGAAAATAACGG-AGAAATACCGACTCTCTTGCAAGAGAGTCGGTATTTCTCCGTTATTTTTTATGTTTT-TCTTTAGTAG---------------TTTTTTATTTCTATCTTTTTTT-TACGAAAAGTAT-TTTTATGCTTTTGCT--TTTATTTTGTCTGATATTTTTGTT----ATGGTTATGAGCTCATATTCGTTATGTACCAGTA--TAATAATATTAGTTATTTGTTAATCCCACTAATAA------AGTTCTAATTTTATTAATTCGATTCTAATTTTCGAATTTT-------TTAGTTTTTTTAATAT--AAAATA-AAAGAAAAGAGAAAGTTGTAA---TTTTATGCCTCTTAAAT-CTTCATTTCTAT---------------TTTAAATGGTAG-AAATTGAAACCTTTTTATTAAATATTTTATTAAATACAAATA-AAAAAAATTTTAAATCTTGG-AGGAAGGGGGGGCGGATGTAGCCAAGTGG
>HD20
CTGCTATTGA--GCCCCATCTACAAAT-GGATAA-TTCTGTC-TTAGTAGA-GACG-AGTTTTTGAAAATAACGG-AGAAATACCGACTCTCTTGCAAGAGAGTCGGTATTTCTCCGTTATTTTTTATGTTTT-TCTTTAGTAG---------------TTTTTTATTTCTATCTTTTTTT-TACGAAAAGTAT-TTTTATGCTTTTGCT--TTTATTTTGTCTGATATTTTTGTT----ATGGTTATGAGCTCATATTCGTTATGTACCAGTA--TAATAATATTAGTTATTTGTTAATCCCACTAATAA------AGTTCTAATTTTATTAATTCGATTCTAATTTTCGAATTTT-------TTAGTTTTTTTAATAT--AAAATA-AAAGAAAAGAGAAAGTTGTAA---TTTTATGCCTCTTAAAT-CTTCATTTCTAT---------------TTTAAATGGTAG-AAATTGAAACCTTTTTATTAAATATTTTATTAAATACAAATA-AAAAAAATTTTAAATCTTGG-AGGAAGGGGGGGCGGATGTAGCCAAGTGG

H40
>WY03
CTGCTATTG--AGCCCCATCTACAAAT-GGATAA-TTCTGTC-TTAGTGGA-GACG-AGTTTTTGAAAATAACGG-AGAAATACCGACTCTCTTGCAAGAGAGTCGGTATTTCTCCGTTATTTTTTATGTTTT-TCTTTAGTAG---------------TTTTTTATTTCTATCCTTTTTT-TG-GGGCAGTAT-TTTTATGCTTTTGCT--TTGGAAGTGTCTGATATTTTTGTT----ATGGTTATGAGCTCATATTCGTTATGTACCAGTA--TAATAATATTAGTTATTTGTTAATCCCACTAATAA------AGTTCTAATTTTATTAATTCGATTCTAATTTTCGAATTTT-------TTAGTTTTTTTAATAG--AAAATA-AAAGAAAAGAGAAAGTTGTAA---TTTTATGCCTCTTAGAT-CTTCATTTCTATTT---------------TAAATGGTAG-AAATTGAAACCTTTTTATTAAATATTTTATTAAATAGAAATA-AAAAAAATTTTAAATCTTGG-AGGAAGGGGGGGCGGATGTAGCCAAGTGG
>WY04
CTGCTATTG--AGCCCCATCTACAAAT-GGATAA-TTCTGTC-TTAGTGGA-GACG-AGTTTTTGAAAATAACGG-AGAAATACCGACTCTCTTGCAAGAGAGTCGGTATTTCTCCGTTATTTTTTATGTTTT-TCTTTAGTAG---------------TTTTTTATTTCTATCCTTTTTT-TG-GGGCAGTAT-TTTTATGCTTTTGCT--TTGGAAGTGTCTGATATTTTTGTT----ATGGTTATGAGCTCATATTCGTTATGTACCAGTA--TAATAATATTAGTTATTTGTTAATCCCACTAATAA------AGTTCTAATTTTATTAATTCGATTCTAATTTTCGAATTTT-------TTAGTTTTTTTAATAG--AAAATA-AAAGAAAAGAGAAAGTTGTAA---TTTTATGCCTCTTAGAT-CTTCATTTCTATTT---------------TAAATGGTAG-AAATTGAAACCTTTTTATTAAATATTTTATTAAATAGAAATA-AAAAAAATTTTAAATCTTGG-AGGAAGGGGGGGCGGATGTAGCCAAGTGG
>WY07
CTGCTATTG--AGCCCCATCTACAAAT-GGATAA-TTCTGTC-TTAGTGGA-GACG-AGTTTTTGAAAATAACGG-AGAAATACCGACTCTCTTGCAAGAGAGTCGGTATTTCTCCGTTATTTTTTATGTTTT-TCTTTAGTAG---------------TTTTTTATTTCTATCCTTTTTT-TG-GGGCAGTAT-TTTTATGCTTTTGCT--TTGGAAGTGTCTGATATTTTTGTT----ATGGTTATGAGCTCATATTCGTTATGTACCAGTA--TAATAATATTAGTTATTTGTTAATCCCACTAATAA------AGTTCTAATTTTATTAATTCGATTCTAATTTTCGAATTTT-------TTAGTTTTTTTAATAG--AAAATA-AAAGAAAAGAGAAAGTTGTAA---TTTTATGCCTCTTAGAT-CTTCATTTCTATTT---------------TAAATGGTAG-AAATTGAAACCTTTTTATTAAATATTTTATTAAATAGAAATA-AAAAAAATTTTAAATCTTGG-AGGAAGGGGGGGCGGATGTAGCCAAGTGG
>GS07
CTGCTATTG--AGCCCCATCTACAAAT-GGATAA-TTCTGTC-TTAGTGGA-GACG-AGTTTTTGAAAATAACGG-AGAAATACCGACTCTCTTGCAAGAGAGTCGGTATTTCTCCGTTATTTTTTATGTTTT-TCTTTAGTAG---------------TTTTTTATTTCTATCCTTTTTT-TG-GGGCAGTAT-TTTTATGCTTTTGCT--TTGGAAGTGTCTGATATTTTTGTT----ATGGTTATGAGCTCATATTCGTTATGTACCAGTA--TAATAATATTAGTTATTTGTTAATCCCACTAATAA------AGTTCTAATTTTATTAATTCGATTCTAATTTTCGAATTTT-------TTAGTTTTTTTAATAG--AAAATA-AAAGAAAAGAGAAAGTTGTAA---TTTTATGCCTCTTAGAT-CTTCATTTCTATTT---------------TAAATGGTAG-AAATTGAAACCTTTTTATTAAATATTTTATTAAATAGAAATA-AAAAAAATTTTAAATCTTGG-AGGAAGGGGGGGCGGATGTAGCCAAGTGG

H41
>WY05
CTGCTATTGA--GCCCCATCTACAAAT-GGATAA-TTCTGTC-TTAGTGGA-GACG-AGTTTTTGAAAATAACGG-AGAAATACCGACTCTCTTGCAAGAGAGTCGGTATTTCTCCGTTATTTTTTATGTTTT-TCTTTAGTAG---------------TTTTTTATTTCTATCCTTTTTT-TG-GGGCAGTAT-TTTTATGCTTTTGCT--TTGGAAGTGTCTGATATTTTTGTT----ATGGTTATGAGCTCATATTCGTTATGTACCAGTA--TAATAATATTAGTTATTTGTTAATCCCACTAATAA------AGTTCTAATTTTATTAATTCGATTCTAATTTTCGAATTTT-------TTAGTTTTTTTAATAG--AAAATA-AAAGAAAAGAGAAAGTTGTAA---TTTTATGCCTCTTAAAT-CTTCATTTCTATTT---------------TAAATGGTAG-AAATTGAAACCTTTTTATTAAATATTTTATTAAATAGAAATA-AAAAAAATTTTAAATCGTGG-AGGAAGGGGGGGCGGATGTAGCCAAGTGG
>XE03
CTGCTATTGA--GCCCCATCTACAAAT-GGATAA-TTCTGTC-TTAGTGGA-GACG-AGTTTTTGAAAATAACGG-AGAAATACCGACTCTCTTGCAAGAGAGTCGGTATTTCTCCGTTATTTTTTATGTTTT-TCTTTAGTAG---------------TTTTTTATTTCTATCCTTTTTT-TG-GGGCAGTAT-TTTTATGCTTTTGCT--TTGGAAGTGTCTGATATTTTTGTT----ATGGTTATGAGCTCATATTCGTTATGTACCAGTA--TAATAATATTAGTTATTTGTTAATCCCACTAATAA------AGTTCTAATTTTATTAATTCGATTCTAATTTTCGAATTTT-------TTAGTTTTTTTAATAG--AAAATA-AAAGAAAAGAGAAAGTTGTAA---TTTTATGCCTCTTAAAT-CTTCATTTCTATTT---------------TAAATGGTAG-AAATTGAAACCTTTTTATTAAATATTTTATTAAATAGAAATA-AAAAAAATTTTAAATCGTGG-AGGAAGGGGGGGCGGATGTAGCCAAGTGG

H42
>XE06
CTGCTATTGA--GCCCCATCTACAAAT-GGATAA-TTCTGTC-TTAGTGGA-GACG-AGTTTTTGAAAATAACGG-AGAAATACCGACTCTCTTGCAAGAGAGTCGGTATTTCTCAGTTATTTTTTATGTTTT-TCTTTAGTAG---------------TTTTTTATTTCTATCCTTTTTT-TG-GGGCAGTAT-TTTTATGCTTTTGCT--TTGGAAGTGTCTGATATTTTTGTT----ATGGTTATGGGCTCATATTCGTTATGTACCAGTA--TAATAATATTAGTTATTTGTTAATCCCACTAATAA------AGTTCTAATTTTATTAATTCGATTCTAATTTTCGAATTTT-------TTAGTTTTTTTAATAG--AAAATA-AAAGAAAAGAGAAAGTTGTAA---TTTTATGCCTCTTAGAT-CTTCATTTCTATTT---------------TAAATGGTAG-AAATTGAAACCTTTTTATTAAATATTTTATTAAATAGAAATA-AAAAAAATTTTAAATCGTGG-AGGAAGGGGGGGCGGATGTAGCCAAGTGG
>GS02
CTGCTATTGA--GCCCCATCTACAAAT-GGATAA-TTCTGTC-TTAGTGGA-GACG-AGTTTTTGAAAATAACGG-AGAAATACCGACTCTCTTGCAAGAGAGTCGGTATTTCTCAGTTATTTTTTATGTTTT-TCTTTAGTAG---------------TTTTTTATTTCTATCCTTTTTT-TG-GGGCAGTAT-TTTTATGCTTTTGCT--TTGGAAGTGTCTGATATTTTTGTT----ATGGTTATGGGCTCATATTCGTTATGTACCAGTA--TAATAATATTAGTTATTTGTTAATCCCACTAATAA------AGTTCTAATTTTATTAATTCGATTCTAATTTTCGAATTTT-------TTAGTTTTTTTAATAG--AAAATA-AAAGAAAAGAGAAAGTTGTAA---TTTTATGCCTCTTAGAT-CTTCATTTCTATTT---------------TAAATGGTAG-AAATTGAAACCTTTTTATTAAATATTTTATTAAATAGAAATA-AAAAAAATTTTAAATCGTGG-AGGAAGGGGGGGCGGATGTAGCCAAGTGG

H43
>DC03
CTGCTATTGA--GCCCCATCTACAAAT-GGATAA-TTCTGTC-TTAGTAGA-GACG-AGTTTTTGAAAATAACGG-AGAAATACCGACTCTCTTGCAAGAGAGTCGGTATTTCTCCGTTATTTTTTATGTTTT-TCTTTAATAG---------------TTTTTTATTTCTATCTTTTTTT-TACGAAAAGTAT-TTTTATGCTTTTGCT--TTTATTTTGTCTGATATTTTTGTT----ATGGTTATGGGCTCATATTCGTTATGTACCAGTA--TAATAATATTAGTTATTTGTTAATCCCACTAATAA------AGTTCTAATTTTATTAATTCGATTCTAATTTTCGAATTTT-------TTAGTTTTTTTAATAT--AAAATA-AAAGAAAAGAGAAAGTTGTAA---TTTTATGCCTCTTAGAT-CTTCATTTCTAT---------------TTTAAATGGTAG-AAATTGAAACCTTTTTATTAAATATTTTATTAAATAGAAATA-AAAAAAATTTTAAATCGTGG-AGGAAGGGGGGGCGGATGTAGCCAAGTGG
>DC07
CTGCTATTGA--GCCCCATCTACAAAT-GGATAA-TTCTGTC-TTAGTAGA-GACG-AGTTTTTGAAAATAACGG-AGAAATACCGACTCTCTTGCAAGAGAGTCGGTATTTCTCCGTTATTTTTTATGTTTT-TCTTTAATAG---------------TTTTTTATTTCTATCTTTTTTT-TACGAAAAGTAT-TTTTATGCTTTTGCT--TTTATTTTGTCTGATATTTTTGTT----ATGGTTATGGGCTCATATTCGTTATGTACCAGTA--TAATAATATTAGTTATTTGTTAATCCCACTAATAA------AGTTCTAATTTTATTAATTCGATTCTAATTTTCGAATTTT-------TTAGTTTTTTTAATAT--AAAATA-AAAGAAAAGAGAAAGTTGTAA---TTTTATGCCTCTTAGAT-CTTCATTTCTAT---------------TTTAAATGGTAG-AAATTGAAACCTTTTTATTAAATATTTTATTAAATAGAAATA-AAAAAAATTTTAAATCGTGG-AGGAAGGGGGGGCGGATGTAGCCAAGTGG
>DC26
CTGCTATTGA--GCCCCATCTACAAAT-GGATAA-TTCTGTC-TTAGTAGA-GACG-AGTTTTTGAAAATAACGG-AGAAATACCGACTCTCTTGCAAGAGAGTCGGTATTTCTCCGTTATTTTTTATGTTTT-TCTTTAATAG---------------TTTTTTATTTCTATCTTTTTTT-TACGAAAAGTAT-TTTTATGCTTTTGCT--TTTATTTTGTCTGATATTTTTGTT----ATGGTTATGGGCTCATATTCGTTATGTACCAGTA--TAATAATATTAGTTATTTGTTAATCCCACTAATAA------AGTTCTAATTTTATTAATTCGATTCTAATTTTCGAATTTT-------TTAGTTTTTTTAATAT--AAAATA-AAAGAAAAGAGAAAGTTGTAA---TTTTATGCCTCTTAGAT-CTTCATTTCTAT---------------TTTAAATGGTAG-AAATTGAAACCTTTTTATTAAATATTTTATTAAATAGAAATA-AAAAAAATTTTAAATCGTGG-AGGAAGGGGGGGCGGATGTAGCCAAGTGG

H44
>DC04
CTGCTATTGA--GCCCCATCTACAAAT-GGATAA-TTCTGTC-TTAGTAGA-GACG-AGTTTTTGAAAATAACGG-AGAAATACCGACTCTCTTGCAAGAGAGTCGGTATTTCTCCGTTATTTTTTATGTTTT-TCTTTAGTAG---------------TTTTTTATTTCTATCTTTTTTT-TACGAAAAGTAT-TTTTATGCTTTTGCT--TTTATTTTGTCTGATATTTTTGTT----ATGGTTATGGGCTCATATTCGTTATGTACCAGTA--TAATAATATTAGTTATTTGTTAATCCCACTAATAA------AGTTCTAATTTTATTAATTCGATTCTAATTTTCGAATTTT-------TTAGTTTTTTTAATAT--AAAATA-AAAGAAAAGAGAAAGTTGTAA---TTTTATGCCTCTTAGAT-CTTCATTTCTAT---------------TTTAAATGGTAG-AAATTGAAACCTTTTTATTAAATATTTTATTAAATAGAAATA-AAAAAAATTTTAAATCGTGG-AGGAAGGGGGGGCGGATGTAGCCAAGTGG
>DC17
CTGCTATTGA--GCCCCATCTACAAAT-GGATAA-TTCTGTC-TTAGTAGA-GACG-AGTTTTTGAAAATAACGG-AGAAATACCGACTCTCTTGCAAGAGAGTCGGTATTTCTCCGTTATTTTTTATGTTTT-TCTTTAGTAG---------------TTTTTTATTTCTATCTTTTTTT-TACGAAAAGTAT-TTTTATGCTTTTGCT--TTTATTTTGTCTGATATTTTTGTT----ATGGTTATGGGCTCATATTCGTTATGTACCAGTA--TAATAATATTAGTTATTTGTTAATCCCACTAATAA------AGTTCTAATTTTATTAATTCGATTCTAATTTTCGAATTTT-------TTAGTTTTTTTAATAT--AAAATA-AAAGAAAAGAGAAAGTTGTAA---TTTTATGCCTCTTAGAT-CTTCATTTCTAT---------------TTTAAATGGTAG-AAATTGAAACCTTTTTATTAAATATTTTATTAAATAGAAATA-AAAAAAATTTTAAATCGTGG-AGGAAGGGGGGGCGGATGTAGCCAAGTGG
>DC18
CTGCTATTGA--GCCCCATCTACAAAT-GGATAA-TTCTGTC-TTAGTAGA-GACG-AGTTTTTGAAAATAACGG-AGAAATACCGACTCTCTTGCAAGAGAGTCGGTATTTCTCCGTTATTTTTTATGTTTT-TCTTTAGTAG---------------TTTTTTATTTCTATCTTTTTTT-TACGAAAAGTAT-TTTTATGCTTTTGCT--TTTATTTTGTCTGATATTTTTGTT----ATGGTTATGGGCTCATATTCGTTATGTACCAGTA--TAATAATATTAGTTATTTGTTAATCCCACTAATAA------AGTTCTAATTTTATTAATTCGATTCTAATTTTCGAATTTT-------TTAGTTTTTTTAATAT--AAAATA-AAAGAAAAGAGAAAGTTGTAA---TTTTATGCCTCTTAGAT-CTTCATTTCTAT---------------TTTAAATGGTAG-AAATTGAAACCTTTTTATTAAATATTTTATTAAATAGAAATA-AAAAAAATTTTAAATCGTGG-AGGAAGGGGGGGCGGATGTAGCCAAGTGG

H45
>GS01
CTGCTATTGA--GCCCCATCTACAAAT-GGATAA-TTCTGTC-TTAGTGGA-GACG-AGTTTTTGAAAATAACGG-AGAAATACCGACTCTCTTGCAAGAGAGTCGGTATTTCTCCGTTATTTTTTATGTTTT-TCTTTAGTAG---------------TTTTTTATTTCTATCCTTTTTT-TG-GGGCAGTAT-TTTTATGCTTTTGCT--TGGGAAGTGTCTGATATTTTTGTT----ATGGTTATGGGCTCATATTCGTTATGTACCAGTA--TAATAATATTAGTTATTTGTTAATCCCACTAATAA------AGTTCTAATTTTATTAATTCGATTCTAATTTTCGAATTTT-------TTAGTTTTTTTAATAG--AAAATA-AAAGAAAAGAGAAAGTTGTAA---TTTTATGCCTCTTAAAT-CTTCATTTCTATTT---------------TAAATGGTAG-AAATTGAAACCTTTTTATTAAATATTTTATTAAATAGAAATA-AAAAAAATTTTAAATCGTGG-AGGAAGGGGGGGCGGATGTAGCCAAGTGG
>MT04
CTGCTATTGA--GCCCCATCTACAAAT-GGATAA-TTCTGTC-TTAGTGGA-GACG-AGTTTTTGAAAATAACGG-AGAAATACCGACTCTCTTGCAAGAGAGTCGGTATTTCTCCGTTATTTTTTATGTTTT-TCTTTAGTAG---------------TTTTTTATTTCTATCCTTTTTT-TG-GGGCAGTAT-TTTTATGCTTTTGCT--TGGGAAGTGTCTGATATTTTTGTT----ATGGTTATGGGCTCATATTCGTTATGTACCAGTA--TAATAATATTAGTTATTTGTTAATCCCACTAATAA------AGTTCTAATTTTATTAATTCGATTCTAATTTTCGAATTTT-------TTAGTTTTTTTAATAG--AAAATA-AAAGAAAAGAGAAAGTTGTAA---TTTTATGCCTCTTAAAT-CTTCATTTCTATTT---------------TAAATGGTAG-AAATTGAAACCTTTTTATTAAATATTTTATTAAATAGAAATA-AAAAAAATTTTAAATCGTGG-AGGAAGGGGGGGCGGATGTAGCCAAGTGG

H46
>GS05
CTGCTATTGA--GCCCCATCTACAAAT-GGATAA-TTCTGTC-TTAGTGGA-GACGA-GTTTTTGAAAATAACGG-AGAAATACCGACTCTCTTGCAAGAGAGTCGGTATTTCTCCGTTATTTTTTATGTTTT-TCTTTAGTAG---------------TTTTTTATTTCTATCCTTTTTT-TACGAAAAGTAT-TTTTATGCTTTTGCT--TTGATTTTGTCTGATATTTTTGTT----ATGGTTATGGGCTCATATTCGTTATGTACCAGTA--TAATAATATTAGTTATTTGTTAATCCCACTAATAA------AGTTCTAATTTTATTAATTCGATTCTAATTTTCGAATTTT-------TTAGTTTTTTTAATAG--AAAATA-AAAGAAAAGAGAAAGTTGTAA---TTTTATGCCTCTTAAAT-CTTCATTTCTATTT---------------TAAATGGTAG-AAATTGAAACCTTTTTATTAAATATTTTATTAAATAGAAATA-AAAAAAATTTTAAATCGTGG-AGGAAGGGGGGGCGGATGTAGCCAAGTGG
>LC02
CTGCTATTGA--GCCCCATCTACAAAT-GGATAA-TTCTGTC-TTAGTGGA-GACGA-GTTTTTGAAAATAACGG-AGAAATACCGACTCTCTTGCAAGAGAGTCGGTATTTCTCCGTTATTTTTTATGTTTT-TCTTTAGTAG---------------TTTTTTATTTCTATCCTTTTTT-TACGAAAAGTAT-TTTTATGCTTTTGCT--TTGATTTTGTCTGATATTTTTGTT----ATGGTTATGGGCTCATATTCGTTATGTACCAGTA--TAATAATATTAGTTATTTGTTAATCCCACTAATAA------AGTTCTAATTTTATTAATTCGATTCTAATTTTCGAATTTT-------TTAGTTTTTTTAATAG--AAAATA-AAAGAAAAGAGAAAGTTGTAA---TTTTATGCCTCTTAAAT-CTTCATTTCTATTT---------------TAAATGGTAG-AAATTGAAACCTTTTTATTAAATATTTTATTAAATAGAAATA-AAAAAAATTTTAAATCGTGG-AGGAAGGGGGGGCGGATGTAGCCAAGTGG
