# Supplementary material for: Population Structure and Genetic Diversity of the Toona ciliata (Meliaceae) Complex Assayed with Chloroplast DNA Markers
Source: Genes (Basel). 2024 Feb 28;15(3):320. doi: 10.3390/genes15030320 (PMC10970150; doi:10.3390/genes15030320)
Supplement: Supplementary file 1 [file genes-15-00320-s001.zip › genes-2866691-supplementary/Table S2.txt]

H1
>XJ01
AGTGATAA--CTTT-CAAA--TTCAGA-GAAACCCTGGAATC--AAAAATGGGCAATCCT-GAGCCAAATCCT-GTTTTACAAGAACAAACAAGGGTTCAGAAAGCGAAAAAAAAA-GAAGGGGATAGGTGCAGAGACTCAACGGAAGCTGTTCTAAGAAATGGGGTTGACTGCCTTTTTTGGTAAAGAAAGGAAAAGAAATCCT----------ATCGAAACTCCATAAAGGATGAAGGATAAGCGTATATACACTATGTATACACAATGAAAAACTATCTCAAAAATGACAACCGAATCCGTATTTTTTTT-ATGAAAAAGAAAAGAATTGTTATGAATCAATTCCAAGTTGAAGAAAGAATCGAATATTCATTGATCAAATCATTCACTCCATAGTCTGATCGATCTTTTCTTTTGAAGAACTGATTAATCGGACAAGAATAAAGATAGAGTCCCATTCTACATGTCAATATCAATACCGGCAACAATGAAATTTAGAGTAAGAGGAAAATCCGTCGACTTTAGAAATCGTGAGGGTTCAAG
>XJ02
AGTGATAA--CTTT-CAAA--TTCAGA-GAAACCCTGGAATC--AAAAATGGGCAATCCT-GAGCCAAATCCT-GTTTTACAAGAACAAACAAGGGTTCAGAAAGCGAAAAAAAAA-GAAGGGGATAGGTGCAGAGACTCAACGGAAGCTGTTCTAAGAAATGGGGTTGACTGCCTTTTTTGGTAAAGAAAGGAAAAGAAATCCT----------ATCGAAACTCCATAAAGGATGAAGGATAAGCGTATATACACTATGTATACACAATGAAAAACTATCTCAAAAATGACAACCGAATCCGTATTTTTTTT-ATGAAAAAGAAAAGAATTGTTATGAATCAATTCCAAGTTGAAGAAAGAATCGAATATTCATTGATCAAATCATTCACTCCATAGTCTGATCGATCTTTTCTTTTGAAGAACTGATTAATCGGACAAGAATAAAGATAGAGTCCCATTCTACATGTCAATATCAATACCGGCAACAATGAAATTTAGAGTAAGAGGAAAATCCGTCGACTTTAGAAATCGTGAGGGTTCAAG
>XJ03
AGTGATAA--CTTT-CAAA--TTCAGA-GAAACCCTGGAATC--AAAAATGGGCAATCCT-GAGCCAAATCCT-GTTTTACAAGAACAAACAAGGGTTCAGAAAGCGAAAAAAAAA-GAAGGGGATAGGTGCAGAGACTCAACGGAAGCTGTTCTAAGAAATGGGGTTGACTGCCTTTTTTGGTAAAGAAAGGAAAAGAAATCCT----------ATCGAAACTCCATAAAGGATGAAGGATAAGCGTATATACACTATGTATACACAATGAAAAACTATCTCAAAAATGACAACCGAATCCGTATTTTTTTT-ATGAAAAAGAAAAGAATTGTTATGAATCAATTCCAAGTTGAAGAAAGAATCGAATATTCATTGATCAAATCATTCACTCCATAGTCTGATCGATCTTTTCTTTTGAAGAACTGATTAATCGGACAAGAATAAAGATAGAGTCCCATTCTACATGTCAATATCAATACCGGCAACAATGAAATTTAGAGTAAGAGGAAAATCCGTCGACTTTAGAAATCGTGAGGGTTCAAG
>XJ04
AGTGATAA--CTTT-CAAA--TTCAGA-GAAACCCTGGAATC--AAAAATGGGCAATCCT-GAGCCAAATCCT-GTTTTACAAGAACAAACAAGGGTTCAGAAAGCGAAAAAAAAA-GAAGGGGATAGGTGCAGAGACTCAACGGAAGCTGTTCTAAGAAATGGGGTTGACTGCCTTTTTTGGTAAAGAAAGGAAAAGAAATCCT----------ATCGAAACTCCATAAAGGATGAAGGATAAGCGTATATACACTATGTATACACAATGAAAAACTATCTCAAAAATGACAACCGAATCCGTATTTTTTTT-ATGAAAAAGAAAAGAATTGTTATGAATCAATTCCAAGTTGAAGAAAGAATCGAATATTCATTGATCAAATCATTCACTCCATAGTCTGATCGATCTTTTCTTTTGAAGAACTGATTAATCGGACAAGAATAAAGATAGAGTCCCATTCTACATGTCAATATCAATACCGGCAACAATGAAATTTAGAGTAAGAGGAAAATCCGTCGACTTTAGAAATCGTGAGGGTTCAAG
>XJ05
AGTGATAA--CTTT-CAAA--TTCAGA-GAAACCCTGGAATC--AAAAATGGGCAATCCT-GAGCCAAATCCT-GTTTTACAAGAACAAACAAGGGTTCAGAAAGCGAAAAAAAAA-GAAGGGGATAGGTGCAGAGACTCAACGGAAGCTGTTCTAAGAAATGGGGTTGACTGCCTTTTTTGGTAAAGAAAGGAAAAGAAATCCT----------ATCGAAACTCCATAAAGGATGAAGGATAAGCGTATATACACTATGTATACACAATGAAAAACTATCTCAAAAATGACAACCGAATCCGTATTTTTTTT-ATGAAAAAGAAAAGAATTGTTATGAATCAATTCCAAGTTGAAGAAAGAATCGAATATTCATTGATCAAATCATTCACTCCATAGTCTGATCGATCTTTTCTTTTGAAGAACTGATTAATCGGACAAGAATAAAGATAGAGTCCCATTCTACATGTCAATATCAATACCGGCAACAATGAAATTTAGAGTAAGAGGAAAATCCGTCGACTTTAGAAATCGTGAGGGTTCAAG
>XJ06
AGTGATAA--CTTT-CAAA--TTCAGA-GAAACCCTGGAATC--AAAAATGGGCAATCCT-GAGCCAAATCCT-GTTTTACAAGAACAAACAAGGGTTCAGAAAGCGAAAAAAAAA-GAAGGGGATAGGTGCAGAGACTCAACGGAAGCTGTTCTAAGAAATGGGGTTGACTGCCTTTTTTGGTAAAGAAAGGAAAAGAAATCCT----------ATCGAAACTCCATAAAGGATGAAGGATAAGCGTATATACACTATGTATACACAATGAAAAACTATCTCAAAAATGACAACCGAATCCGTATTTTTTTT-ATGAAAAAGAAAAGAATTGTTATGAATCAATTCCAAGTTGAAGAAAGAATCGAATATTCATTGATCAAATCATTCACTCCATAGTCTGATCGATCTTTTCTTTTGAAGAACTGATTAATCGGACAAGAATAAAGATAGAGTCCCATTCTACATGTCAATATCAATACCGGCAACAATGAAATTTAGAGTAAGAGGAAAATCCGTCGACTTTAGAAATCGTGAGGGTTCAAG
>XJ07
AGTGATAA--CTTT-CAAA--TTCAGA-GAAACCCTGGAATC--AAAAATGGGCAATCCT-GAGCCAAATCCT-GTTTTACAAGAACAAACAAGGGTTCAGAAAGCGAAAAAAAAA-GAAGGGGATAGGTGCAGAGACTCAACGGAAGCTGTTCTAAGAAATGGGGTTGACTGCCTTTTTTGGTAAAGAAAGGAAAAGAAATCCT----------ATCGAAACTCCATAAAGGATGAAGGATAAGCGTATATACACTATGTATACACAATGAAAAACTATCTCAAAAATGACAACCGAATCCGTATTTTTTTT-ATGAAAAAGAAAAGAATTGTTATGAATCAATTCCAAGTTGAAGAAAGAATCGAATATTCATTGATCAAATCATTCACTCCATAGTCTGATCGATCTTTTCTTTTGAAGAACTGATTAATCGGACAAGAATAAAGATAGAGTCCCATTCTACATGTCAATATCAATACCGGCAACAATGAAATTTAGAGTAAGAGGAAAATCCGTCGACTTTAGAAATCGTGAGGGTTCAAG
>XJ08
AGTGATAA--CTTT-CAAA--TTCAGA-GAAACCCTGGAATC--AAAAATGGGCAATCCT-GAGCCAAATCCT-GTTTTACAAGAACAAACAAGGGTTCAGAAAGCGAAAAAAAAA-GAAGGGGATAGGTGCAGAGACTCAACGGAAGCTGTTCTAAGAAATGGGGTTGACTGCCTTTTTTGGTAAAGAAAGGAAAAGAAATCCT----------ATCGAAACTCCATAAAGGATGAAGGATAAGCGTATATACACTATGTATACACAATGAAAAACTATCTCAAAAATGACAACCGAATCCGTATTTTTTTT-ATGAAAAAGAAAAGAATTGTTATGAATCAATTCCAAGTTGAAGAAAGAATCGAATATTCATTGATCAAATCATTCACTCCATAGTCTGATCGATCTTTTCTTTTGAAGAACTGATTAATCGGACAAGAATAAAGATAGAGTCCCATTCTACATGTCAATATCAATACCGGCAACAATGAAATTTAGAGTAAGAGGAAAATCCGTCGACTTTAGAAATCGTGAGGGTTCAAG
>XJ09
AGTGATAA--CTTT-CAAA--TTCAGA-GAAACCCTGGAATC--AAAAATGGGCAATCCT-GAGCCAAATCCT-GTTTTACAAGAACAAACAAGGGTTCAGAAAGCGAAAAAAAAA-GAAGGGGATAGGTGCAGAGACTCAACGGAAGCTGTTCTAAGAAATGGGGTTGACTGCCTTTTTTGGTAAAGAAAGGAAAAGAAATCCT----------ATCGAAACTCCATAAAGGATGAAGGATAAGCGTATATACACTATGTATACACAATGAAAAACTATCTCAAAAATGACAACCGAATCCGTATTTTTTTT-ATGAAAAAGAAAAGAATTGTTATGAATCAATTCCAAGTTGAAGAAAGAATCGAATATTCATTGATCAAATCATTCACTCCATAGTCTGATCGATCTTTTCTTTTGAAGAACTGATTAATCGGACAAGAATAAAGATAGAGTCCCATTCTACATGTCAATATCAATACCGGCAACAATGAAATTTAGAGTAAGAGGAAAATCCGTCGACTTTAGAAATCGTGAGGGTTCAAG
>SC01
AGTGATAA--CTTT-CAAA--TTCAGA-GAAACCCTGGAATC--AAAAATGGGCAATCCT-GAGCCAAATCCT-GTTTTACAAGAACAAACAAGGGTTCAGAAAGCGAAAAAAAAA-GAAGGGGATAGGTGCAGAGACTCAACGGAAGCTGTTCTAAGAAATGGGGTTGACTGCCTTTTTTGGTAAAGAAAGGAAAAGAAATCCT----------ATCGAAACTCCATAAAGGATGAAGGATAAGCGTATATACACTATGTATACACAATGAAAAACTATCTCAAAAATGACAACCGAATCCGTATTTTTTTT-ATGAAAAAGAAAAGAATTGTTATGAATCAATTCCAAGTTGAAGAAAGAATCGAATATTCATTGATCAAATCATTCACTCCATAGTCTGATCGATCTTTTCTTTTGAAGAACTGATTAATCGGACAAGAATAAAGATAGAGTCCCATTCTACATGTCAATATCAATACCGGCAACAATGAAATTTAGAGTAAGAGGAAAATCCGTCGACTTTAGAAATCGTGAGGGTTCAAG
>SC02
AGTGATAA--CTTT-CAAA--TTCAGA-GAAACCCTGGAATC--AAAAATGGGCAATCCT-GAGCCAAATCCT-GTTTTACAAGAACAAACAAGGGTTCAGAAAGCGAAAAAAAAA-GAAGGGGATAGGTGCAGAGACTCAACGGAAGCTGTTCTAAGAAATGGGGTTGACTGCCTTTTTTGGTAAAGAAAGGAAAAGAAATCCT----------ATCGAAACTCCATAAAGGATGAAGGATAAGCGTATATACACTATGTATACACAATGAAAAACTATCTCAAAAATGACAACCGAATCCGTATTTTTTTT-ATGAAAAAGAAAAGAATTGTTATGAATCAATTCCAAGTTGAAGAAAGAATCGAATATTCATTGATCAAATCATTCACTCCATAGTCTGATCGATCTTTTCTTTTGAAGAACTGATTAATCGGACAAGAATAAAGATAGAGTCCCATTCTACATGTCAATATCAATACCGGCAACAATGAAATTTAGAGTAAGAGGAAAATCCGTCGACTTTAGAAATCGTGAGGGTTCAAG
>SC03
AGTGATAA--CTTT-CAAA--TTCAGA-GAAACCCTGGAATC--AAAAATGGGCAATCCT-GAGCCAAATCCT-GTTTTACAAGAACAAACAAGGGTTCAGAAAGCGAAAAAAAAA-GAAGGGGATAGGTGCAGAGACTCAACGGAAGCTGTTCTAAGAAATGGGGTTGACTGCCTTTTTTGGTAAAGAAAGGAAAAGAAATCCT----------ATCGAAACTCCATAAAGGATGAAGGATAAGCGTATATACACTATGTATACACAATGAAAAACTATCTCAAAAATGACAACCGAATCCGTATTTTTTTT-ATGAAAAAGAAAAGAATTGTTATGAATCAATTCCAAGTTGAAGAAAGAATCGAATATTCATTGATCAAATCATTCACTCCATAGTCTGATCGATCTTTTCTTTTGAAGAACTGATTAATCGGACAAGAATAAAGATAGAGTCCCATTCTACATGTCAATATCAATACCGGCAACAATGAAATTTAGAGTAAGAGGAAAATCCGTCGACTTTAGAAATCGTGAGGGTTCAAG
>SC04
AGTGATAA--CTTT-CAAA--TTCAGA-GAAACCCTGGAATC--AAAAATGGGCAATCCT-GAGCCAAATCCT-GTTTTACAAGAACAAACAAGGGTTCAGAAAGCGAAAAAAAAA-GAAGGGGATAGGTGCAGAGACTCAACGGAAGCTGTTCTAAGAAATGGGGTTGACTGCCTTTTTTGGTAAAGAAAGGAAAAGAAATCCT----------ATCGAAACTCCATAAAGGATGAAGGATAAGCGTATATACACTATGTATACACAATGAAAAACTATCTCAAAAATGACAACCGAATCCGTATTTTTTTT-ATGAAAAAGAAAAGAATTGTTATGAATCAATTCCAAGTTGAAGAAAGAATCGAATATTCATTGATCAAATCATTCACTCCATAGTCTGATCGATCTTTTCTTTTGAAGAACTGATTAATCGGACAAGAATAAAGATAGAGTCCCATTCTACATGTCAATATCAATACCGGCAACAATGAAATTTAGAGTAAGAGGAAAATCCGTCGACTTTAGAAATCGTGAGGGTTCAAG
>SC05
AGTGATAA--CTTT-CAAA--TTCAGA-GAAACCCTGGAATC--AAAAATGGGCAATCCT-GAGCCAAATCCT-GTTTTACAAGAACAAACAAGGGTTCAGAAAGCGAAAAAAAAA-GAAGGGGATAGGTGCAGAGACTCAACGGAAGCTGTTCTAAGAAATGGGGTTGACTGCCTTTTTTGGTAAAGAAAGGAAAAGAAATCCT----------ATCGAAACTCCATAAAGGATGAAGGATAAGCGTATATACACTATGTATACACAATGAAAAACTATCTCAAAAATGACAACCGAATCCGTATTTTTTTT-ATGAAAAAGAAAAGAATTGTTATGAATCAATTCCAAGTTGAAGAAAGAATCGAATATTCATTGATCAAATCATTCACTCCATAGTCTGATCGATCTTTTCTTTTGAAGAACTGATTAATCGGACAAGAATAAAGATAGAGTCCCATTCTACATGTCAATATCAATACCGGCAACAATGAAATTTAGAGTAAGAGGAAAATCCGTCGACTTTAGAAATCGTGAGGGTTCAAG
>SC06
AGTGATAA--CTTT-CAAA--TTCAGA-GAAACCCTGGAATC--AAAAATGGGCAATCCT-GAGCCAAATCCT-GTTTTACAAGAACAAACAAGGGTTCAGAAAGCGAAAAAAAAA-GAAGGGGATAGGTGCAGAGACTCAACGGAAGCTGTTCTAAGAAATGGGGTTGACTGCCTTTTTTGGTAAAGAAAGGAAAAGAAATCCT----------ATCGAAACTCCATAAAGGATGAAGGATAAGCGTATATACACTATGTATACACAATGAAAAACTATCTCAAAAATGACAACCGAATCCGTATTTTTTTT-ATGAAAAAGAAAAGAATTGTTATGAATCAATTCCAAGTTGAAGAAAGAATCGAATATTCATTGATCAAATCATTCACTCCATAGTCTGATCGATCTTTTCTTTTGAAGAACTGATTAATCGGACAAGAATAAAGATAGAGTCCCATTCTACATGTCAATATCAATACCGGCAACAATGAAATTTAGAGTAAGAGGAAAATCCGTCGACTTTAGAAATCGTGAGGGTTCAAG
>SC07
AGTGATAA--CTTT-CAAA--TTCAGA-GAAACCCTGGAATC--AAAAATGGGCAATCCT-GAGCCAAATCCT-GTTTTACAAGAACAAACAAGGGTTCAGAAAGCGAAAAAAAAA-GAAGGGGATAGGTGCAGAGACTCAACGGAAGCTGTTCTAAGAAATGGGGTTGACTGCCTTTTTTGGTAAAGAAAGGAAAAGAAATCCT----------ATCGAAACTCCATAAAGGATGAAGGATAAGCGTATATACACTATGTATACACAATGAAAAACTATCTCAAAAATGACAACCGAATCCGTATTTTTTTT-ATGAAAAAGAAAAGAATTGTTATGAATCAATTCCAAGTTGAAGAAAGAATCGAATATTCATTGATCAAATCATTCACTCCATAGTCTGATCGATCTTTTCTTTTGAAGAACTGATTAATCGGACAAGAATAAAGATAGAGTCCCATTCTACATGTCAATATCAATACCGGCAACAATGAAATTTAGAGTAAGAGGAAAATCCGTCGACTTTAGAAATCGTGAGGGTTCAAG
>SC08
AGTGATAA--CTTT-CAAA--TTCAGA-GAAACCCTGGAATC--AAAAATGGGCAATCCT-GAGCCAAATCCT-GTTTTACAAGAACAAACAAGGGTTCAGAAAGCGAAAAAAAAA-GAAGGGGATAGGTGCAGAGACTCAACGGAAGCTGTTCTAAGAAATGGGGTTGACTGCCTTTTTTGGTAAAGAAAGGAAAAGAAATCCT----------ATCGAAACTCCATAAAGGATGAAGGATAAGCGTATATACACTATGTATACACAATGAAAAACTATCTCAAAAATGACAACCGAATCCGTATTTTTTTT-ATGAAAAAGAAAAGAATTGTTATGAATCAATTCCAAGTTGAAGAAAGAATCGAATATTCATTGATCAAATCATTCACTCCATAGTCTGATCGATCTTTTCTTTTGAAGAACTGATTAATCGGACAAGAATAAAGATAGAGTCCCATTCTACATGTCAATATCAATACCGGCAACAATGAAATTTAGAGTAAGAGGAAAATCCGTCGACTTTAGAAATCGTGAGGGTTCAAG
>SC09
AGTGATAA--CTTT-CAAA--TTCAGA-GAAACCCTGGAATC--AAAAATGGGCAATCCT-GAGCCAAATCCT-GTTTTACAAGAACAAACAAGGGTTCAGAAAGCGAAAAAAAAA-GAAGGGGATAGGTGCAGAGACTCAACGGAAGCTGTTCTAAGAAATGGGGTTGACTGCCTTTTTTGGTAAAGAAAGGAAAAGAAATCCT----------ATCGAAACTCCATAAAGGATGAAGGATAAGCGTATATACACTATGTATACACAATGAAAAACTATCTCAAAAATGACAACCGAATCCGTATTTTTTTT-ATGAAAAAGAAAAGAATTGTTATGAATCAATTCCAAGTTGAAGAAAGAATCGAATATTCATTGATCAAATCATTCACTCCATAGTCTGATCGATCTTTTCTTTTGAAGAACTGATTAATCGGACAAGAATAAAGATAGAGTCCCATTCTACATGTCAATATCAATACCGGCAACAATGAAATTTAGAGTAAGAGGAAAATCCGTCGACTTTAGAAATCGTGAGGGTTCAAG
>SC10
AGTGATAA--CTTT-CAAA--TTCAGA-GAAACCCTGGAATC--AAAAATGGGCAATCCT-GAGCCAAATCCT-GTTTTACAAGAACAAACAAGGGTTCAGAAAGCGAAAAAAAAA-GAAGGGGATAGGTGCAGAGACTCAACGGAAGCTGTTCTAAGAAATGGGGTTGACTGCCTTTTTTGGTAAAGAAAGGAAAAGAAATCCT----------ATCGAAACTCCATAAAGGATGAAGGATAAGCGTATATACACTATGTATACACAATGAAAAACTATCTCAAAAATGACAACCGAATCCGTATTTTTTTT-ATGAAAAAGAAAAGAATTGTTATGAATCAATTCCAAGTTGAAGAAAGAATCGAATATTCATTGATCAAATCATTCACTCCATAGTCTGATCGATCTTTTCTTTTGAAGAACTGATTAATCGGACAAGAATAAAGATAGAGTCCCATTCTACATGTCAATATCAATACCGGCAACAATGAAATTTAGAGTAAGAGGAAAATCCGTCGACTTTAGAAATCGTGAGGGTTCAAG
>SC11
AGTGATAA--CTTT-CAAA--TTCAGA-GAAACCCTGGAATC--AAAAATGGGCAATCCT-GAGCCAAATCCT-GTTTTACAAGAACAAACAAGGGTTCAGAAAGCGAAAAAAAAA-GAAGGGGATAGGTGCAGAGACTCAACGGAAGCTGTTCTAAGAAATGGGGTTGACTGCCTTTTTTGGTAAAGAAAGGAAAAGAAATCCT----------ATCGAAACTCCATAAAGGATGAAGGATAAGCGTATATACACTATGTATACACAATGAAAAACTATCTCAAAAATGACAACCGAATCCGTATTTTTTTT-ATGAAAAAGAAAAGAATTGTTATGAATCAATTCCAAGTTGAAGAAAGAATCGAATATTCATTGATCAAATCATTCACTCCATAGTCTGATCGATCTTTTCTTTTGAAGAACTGATTAATCGGACAAGAATAAAGATAGAGTCCCATTCTACATGTCAATATCAATACCGGCAACAATGAAATTTAGAGTAAGAGGAAAATCCGTCGACTTTAGAAATCGTGAGGGTTCAAG
>SC12
AGTGATAA--CTTT-CAAA--TTCAGA-GAAACCCTGGAATC--AAAAATGGGCAATCCT-GAGCCAAATCCT-GTTTTACAAGAACAAACAAGGGTTCAGAAAGCGAAAAAAAAA-GAAGGGGATAGGTGCAGAGACTCAACGGAAGCTGTTCTAAGAAATGGGGTTGACTGCCTTTTTTGGTAAAGAAAGGAAAAGAAATCCT----------ATCGAAACTCCATAAAGGATGAAGGATAAGCGTATATACACTATGTATACACAATGAAAAACTATCTCAAAAATGACAACCGAATCCGTATTTTTTTT-ATGAAAAAGAAAAGAATTGTTATGAATCAATTCCAAGTTGAAGAAAGAATCGAATATTCATTGATCAAATCATTCACTCCATAGTCTGATCGATCTTTTCTTTTGAAGAACTGATTAATCGGACAAGAATAAAGATAGAGTCCCATTCTACATGTCAATATCAATACCGGCAACAATGAAATTTAGAGTAAGAGGAAAATCCGTCGACTTTAGAAATCGTGAGGGTTCAAG
>CB01
AGTGATAA--CTTT-CAAA--TTCAGA-GAAACCCTGGAATC--AAAAATGGGCAATCCT-GAGCCAAATCCT-GTTTTACAAGAACAAACAAGGGTTCAGAAAGCGAAAAAAAAA-GAAGGGGATAGGTGCAGAGACTCAACGGAAGCTGTTCTAAGAAATGGGGTTGACTGCCTTTTTTGGTAAAGAAAGGAAAAGAAATCCT----------ATCGAAACTCCATAAAGGATGAAGGATAAGCGTATATACACTATGTATACACAATGAAAAACTATCTCAAAAATGACAACCGAATCCGTATTTTTTTT-ATGAAAAAGAAAAGAATTGTTATGAATCAATTCCAAGTTGAAGAAAGAATCGAATATTCATTGATCAAATCATTCACTCCATAGTCTGATCGATCTTTTCTTTTGAAGAACTGATTAATCGGACAAGAATAAAGATAGAGTCCCATTCTACATGTCAATATCAATACCGGCAACAATGAAATTTAGAGTAAGAGGAAAATCCGTCGACTTTAGAAATCGTGAGGGTTCAAG
>CB02
AGTGATAA--CTTT-CAAA--TTCAGA-GAAACCCTGGAATC--AAAAATGGGCAATCCT-GAGCCAAATCCT-GTTTTACAAGAACAAACAAGGGTTCAGAAAGCGAAAAAAAAA-GAAGGGGATAGGTGCAGAGACTCAACGGAAGCTGTTCTAAGAAATGGGGTTGACTGCCTTTTTTGGTAAAGAAAGGAAAAGAAATCCT----------ATCGAAACTCCATAAAGGATGAAGGATAAGCGTATATACACTATGTATACACAATGAAAAACTATCTCAAAAATGACAACCGAATCCGTATTTTTTTT-ATGAAAAAGAAAAGAATTGTTATGAATCAATTCCAAGTTGAAGAAAGAATCGAATATTCATTGATCAAATCATTCACTCCATAGTCTGATCGATCTTTTCTTTTGAAGAACTGATTAATCGGACAAGAATAAAGATAGAGTCCCATTCTACATGTCAATATCAATACCGGCAACAATGAAATTTAGAGTAAGAGGAAAATCCGTCGACTTTAGAAATCGTGAGGGTTCAAG
>CB03
AGTGATAA--CTTT-CAAA--TTCAGA-GAAACCCTGGAATC--AAAAATGGGCAATCCT-GAGCCAAATCCT-GTTTTACAAGAACAAACAAGGGTTCAGAAAGCGAAAAAAAAA-GAAGGGGATAGGTGCAGAGACTCAACGGAAGCTGTTCTAAGAAATGGGGTTGACTGCCTTTTTTGGTAAAGAAAGGAAAAGAAATCCT----------ATCGAAACTCCATAAAGGATGAAGGATAAGCGTATATACACTATGTATACACAATGAAAAACTATCTCAAAAATGACAACCGAATCCGTATTTTTTTT-ATGAAAAAGAAAAGAATTGTTATGAATCAATTCCAAGTTGAAGAAAGAATCGAATATTCATTGATCAAATCATTCACTCCATAGTCTGATCGATCTTTTCTTTTGAAGAACTGATTAATCGGACAAGAATAAAGATAGAGTCCCATTCTACATGTCAATATCAATACCGGCAACAATGAAATTTAGAGTAAGAGGAAAATCCGTCGACTTTAGAAATCGTGAGGGTTCAAG
>CB04
AGTGATAA--CTTT-CAAA--TTCAGA-GAAACCCTGGAATC--AAAAATGGGCAATCCT-GAGCCAAATCCT-GTTTTACAAGAACAAACAAGGGTTCAGAAAGCGAAAAAAAAA-GAAGGGGATAGGTGCAGAGACTCAACGGAAGCTGTTCTAAGAAATGGGGTTGACTGCCTTTTTTGGTAAAGAAAGGAAAAGAAATCCT----------ATCGAAACTCCATAAAGGATGAAGGATAAGCGTATATACACTATGTATACACAATGAAAAACTATCTCAAAAATGACAACCGAATCCGTATTTTTTTT-ATGAAAAAGAAAAGAATTGTTATGAATCAATTCCAAGTTGAAGAAAGAATCGAATATTCATTGATCAAATCATTCACTCCATAGTCTGATCGATCTTTTCTTTTGAAGAACTGATTAATCGGACAAGAATAAAGATAGAGTCCCATTCTACATGTCAATATCAATACCGGCAACAATGAAATTTAGAGTAAGAGGAAAATCCGTCGACTTTAGAAATCGTGAGGGTTCAAG
>CB05
AGTGATAA--CTTT-CAAA--TTCAGA-GAAACCCTGGAATC--AAAAATGGGCAATCCT-GAGCCAAATCCT-GTTTTACAAGAACAAACAAGGGTTCAGAAAGCGAAAAAAAAA-GAAGGGGATAGGTGCAGAGACTCAACGGAAGCTGTTCTAAGAAATGGGGTTGACTGCCTTTTTTGGTAAAGAAAGGAAAAGAAATCCT----------ATCGAAACTCCATAAAGGATGAAGGATAAGCGTATATACACTATGTATACACAATGAAAAACTATCTCAAAAATGACAACCGAATCCGTATTTTTTTT-ATGAAAAAGAAAAGAATTGTTATGAATCAATTCCAAGTTGAAGAAAGAATCGAATATTCATTGATCAAATCATTCACTCCATAGTCTGATCGATCTTTTCTTTTGAAGAACTGATTAATCGGACAAGAATAAAGATAGAGTCCCATTCTACATGTCAATATCAATACCGGCAACAATGAAATTTAGAGTAAGAGGAAAATCCGTCGACTTTAGAAATCGTGAGGGTTCAAG
>CB06
AGTGATAA--CTTT-CAAA--TTCAGA-GAAACCCTGGAATC--AAAAATGGGCAATCCT-GAGCCAAATCCT-GTTTTACAAGAACAAACAAGGGTTCAGAAAGCGAAAAAAAAA-GAAGGGGATAGGTGCAGAGACTCAACGGAAGCTGTTCTAAGAAATGGGGTTGACTGCCTTTTTTGGTAAAGAAAGGAAAAGAAATCCT----------ATCGAAACTCCATAAAGGATGAAGGATAAGCGTATATACACTATGTATACACAATGAAAAACTATCTCAAAAATGACAACCGAATCCGTATTTTTTTT-ATGAAAAAGAAAAGAATTGTTATGAATCAATTCCAAGTTGAAGAAAGAATCGAATATTCATTGATCAAATCATTCACTCCATAGTCTGATCGATCTTTTCTTTTGAAGAACTGATTAATCGGACAAGAATAAAGATAGAGTCCCATTCTACATGTCAATATCAATACCGGCAACAATGAAATTTAGAGTAAGAGGAAAATCCGTCGACTTTAGAAATCGTGAGGGTTCAAG
>CB07
AGTGATAA--CTTT-CAAA--TTCAGA-GAAACCCTGGAATC--AAAAATGGGCAATCCT-GAGCCAAATCCT-GTTTTACAAGAACAAACAAGGGTTCAGAAAGCGAAAAAAAAA-GAAGGGGATAGGTGCAGAGACTCAACGGAAGCTGTTCTAAGAAATGGGGTTGACTGCCTTTTTTGGTAAAGAAAGGAAAAGAAATCCT----------ATCGAAACTCCATAAAGGATGAAGGATAAGCGTATATACACTATGTATACACAATGAAAAACTATCTCAAAAATGACAACCGAATCCGTATTTTTTTT-ATGAAAAAGAAAAGAATTGTTATGAATCAATTCCAAGTTGAAGAAAGAATCGAATATTCATTGATCAAATCATTCACTCCATAGTCTGATCGATCTTTTCTTTTGAAGAACTGATTAATCGGACAAGAATAAAGATAGAGTCCCATTCTACATGTCAATATCAATACCGGCAACAATGAAATTTAGAGTAAGAGGAAAATCCGTCGACTTTAGAAATCGTGAGGGTTCAAG
>CB08
AGTGATAA--CTTT-CAAA--TTCAGA-GAAACCCTGGAATC--AAAAATGGGCAATCCT-GAGCCAAATCCT-GTTTTACAAGAACAAACAAGGGTTCAGAAAGCGAAAAAAAAA-GAAGGGGATAGGTGCAGAGACTCAACGGAAGCTGTTCTAAGAAATGGGGTTGACTGCCTTTTTTGGTAAAGAAAGGAAAAGAAATCCT----------ATCGAAACTCCATAAAGGATGAAGGATAAGCGTATATACACTATGTATACACAATGAAAAACTATCTCAAAAATGACAACCGAATCCGTATTTTTTTT-ATGAAAAAGAAAAGAATTGTTATGAATCAATTCCAAGTTGAAGAAAGAATCGAATATTCATTGATCAAATCATTCACTCCATAGTCTGATCGATCTTTTCTTTTGAAGAACTGATTAATCGGACAAGAATAAAGATAGAGTCCCATTCTACATGTCAATATCAATACCGGCAACAATGAAATTTAGAGTAAGAGGAAAATCCGTCGACTTTAGAAATCGTGAGGGTTCAAG
>CB09
AGTGATAA--CTTT-CAAA--TTCAGA-GAAACCCTGGAATC--AAAAATGGGCAATCCT-GAGCCAAATCCT-GTTTTACAAGAACAAACAAGGGTTCAGAAAGCGAAAAAAAAA-GAAGGGGATAGGTGCAGAGACTCAACGGAAGCTGTTCTAAGAAATGGGGTTGACTGCCTTTTTTGGTAAAGAAAGGAAAAGAAATCCT----------ATCGAAACTCCATAAAGGATGAAGGATAAGCGTATATACACTATGTATACACAATGAAAAACTATCTCAAAAATGACAACCGAATCCGTATTTTTTTT-ATGAAAAAGAAAAGAATTGTTATGAATCAATTCCAAGTTGAAGAAAGAATCGAATATTCATTGATCAAATCATTCACTCCATAGTCTGATCGATCTTTTCTTTTGAAGAACTGATTAATCGGACAAGAATAAAGATAGAGTCCCATTCTACATGTCAATATCAATACCGGCAACAATGAAATTTAGAGTAAGAGGAAAATCCGTCGACTTTAGAAATCGTGAGGGTTCAAG
>CB10
AGTGATAA--CTTT-CAAA--TTCAGA-GAAACCCTGGAATC--AAAAATGGGCAATCCT-GAGCCAAATCCT-GTTTTACAAGAACAAACAAGGGTTCAGAAAGCGAAAAAAAAA-GAAGGGGATAGGTGCAGAGACTCAACGGAAGCTGTTCTAAGAAATGGGGTTGACTGCCTTTTTTGGTAAAGAAAGGAAAAGAAATCCT----------ATCGAAACTCCATAAAGGATGAAGGATAAGCGTATATACACTATGTATACACAATGAAAAACTATCTCAAAAATGACAACCGAATCCGTATTTTTTTT-ATGAAAAAGAAAAGAATTGTTATGAATCAATTCCAAGTTGAAGAAAGAATCGAATATTCATTGATCAAATCATTCACTCCATAGTCTGATCGATCTTTTCTTTTGAAGAACTGATTAATCGGACAAGAATAAAGATAGAGTCCCATTCTACATGTCAATATCAATACCGGCAACAATGAAATTTAGAGTAAGAGGAAAATCCGTCGACTTTAGAAATCGTGAGGGTTCAAG
>CB11
AGTGATAA--CTTT-CAAA--TTCAGA-GAAACCCTGGAATC--AAAAATGGGCAATCCT-GAGCCAAATCCT-GTTTTACAAGAACAAACAAGGGTTCAGAAAGCGAAAAAAAAA-GAAGGGGATAGGTGCAGAGACTCAACGGAAGCTGTTCTAAGAAATGGGGTTGACTGCCTTTTTTGGTAAAGAAAGGAAAAGAAATCCT----------ATCGAAACTCCATAAAGGATGAAGGATAAGCGTATATACACTATGTATACACAATGAAAAACTATCTCAAAAATGACAACCGAATCCGTATTTTTTTT-ATGAAAAAGAAAAGAATTGTTATGAATCAATTCCAAGTTGAAGAAAGAATCGAATATTCATTGATCAAATCATTCACTCCATAGTCTGATCGATCTTTTCTTTTGAAGAACTGATTAATCGGACAAGAATAAAGATAGAGTCCCATTCTACATGTCAATATCAATACCGGCAACAATGAAATTTAGAGTAAGAGGAAAATCCGTCGACTTTAGAAATCGTGAGGGTTCAAG
>CB13
AGTGATAA--CTTT-CAAA--TTCAGA-GAAACCCTGGAATC--AAAAATGGGCAATCCT-GAGCCAAATCCT-GTTTTACAAGAACAAACAAGGGTTCAGAAAGCGAAAAAAAAA-GAAGGGGATAGGTGCAGAGACTCAACGGAAGCTGTTCTAAGAAATGGGGTTGACTGCCTTTTTTGGTAAAGAAAGGAAAAGAAATCCT----------ATCGAAACTCCATAAAGGATGAAGGATAAGCGTATATACACTATGTATACACAATGAAAAACTATCTCAAAAATGACAACCGAATCCGTATTTTTTTT-ATGAAAAAGAAAAGAATTGTTATGAATCAATTCCAAGTTGAAGAAAGAATCGAATATTCATTGATCAAATCATTCACTCCATAGTCTGATCGATCTTTTCTTTTGAAGAACTGATTAATCGGACAAGAATAAAGATAGAGTCCCATTCTACATGTCAATATCAATACCGGCAACAATGAAATTTAGAGTAAGAGGAAAATCCGTCGACTTTAGAAATCGTGAGGGTTCAAG
>CB16
AGTGATAA--CTTT-CAAA--TTCAGA-GAAACCCTGGAATC--AAAAATGGGCAATCCT-GAGCCAAATCCT-GTTTTACAAGAACAAACAAGGGTTCAGAAAGCGAAAAAAAAA-GAAGGGGATAGGTGCAGAGACTCAACGGAAGCTGTTCTAAGAAATGGGGTTGACTGCCTTTTTTGGTAAAGAAAGGAAAAGAAATCCT----------ATCGAAACTCCATAAAGGATGAAGGATAAGCGTATATACACTATGTATACACAATGAAAAACTATCTCAAAAATGACAACCGAATCCGTATTTTTTTT-ATGAAAAAGAAAAGAATTGTTATGAATCAATTCCAAGTTGAAGAAAGAATCGAATATTCATTGATCAAATCATTCACTCCATAGTCTGATCGATCTTTTCTTTTGAAGAACTGATTAATCGGACAAGAATAAAGATAGAGTCCCATTCTACATGTCAATATCAATACCGGCAACAATGAAATTTAGAGTAAGAGGAAAATCCGTCGACTTTAGAAATCGTGAGGGTTCAAG
>CB17
AGTGATAA--CTTT-CAAA--TTCAGA-GAAACCCTGGAATC--AAAAATGGGCAATCCT-GAGCCAAATCCT-GTTTTACAAGAACAAACAAGGGTTCAGAAAGCGAAAAAAAAA-GAAGGGGATAGGTGCAGAGACTCAACGGAAGCTGTTCTAAGAAATGGGGTTGACTGCCTTTTTTGGTAAAGAAAGGAAAAGAAATCCT----------ATCGAAACTCCATAAAGGATGAAGGATAAGCGTATATACACTATGTATACACAATGAAAAACTATCTCAAAAATGACAACCGAATCCGTATTTTTTTT-ATGAAAAAGAAAAGAATTGTTATGAATCAATTCCAAGTTGAAGAAAGAATCGAATATTCATTGATCAAATCATTCACTCCATAGTCTGATCGATCTTTTCTTTTGAAGAACTGATTAATCGGACAAGAATAAAGATAGAGTCCCATTCTACATGTCAATATCAATACCGGCAACAATGAAATTTAGAGTAAGAGGAAAATCCGTCGACTTTAGAAATCGTGAGGGTTCAAG
>CB18
AGTGATAA--CTTT-CAAA--TTCAGA-GAAACCCTGGAATC--AAAAATGGGCAATCCT-GAGCCAAATCCT-GTTTTACAAGAACAAACAAGGGTTCAGAAAGCGAAAAAAAAA-GAAGGGGATAGGTGCAGAGACTCAACGGAAGCTGTTCTAAGAAATGGGGTTGACTGCCTTTTTTGGTAAAGAAAGGAAAAGAAATCCT----------ATCGAAACTCCATAAAGGATGAAGGATAAGCGTATATACACTATGTATACACAATGAAAAACTATCTCAAAAATGACAACCGAATCCGTATTTTTTTT-ATGAAAAAGAAAAGAATTGTTATGAATCAATTCCAAGTTGAAGAAAGAATCGAATATTCATTGATCAAATCATTCACTCCATAGTCTGATCGATCTTTTCTTTTGAAGAACTGATTAATCGGACAAGAATAAAGATAGAGTCCCATTCTACATGTCAATATCAATACCGGCAACAATGAAATTTAGAGTAAGAGGAAAATCCGTCGACTTTAGAAATCGTGAGGGTTCAAG
>CB20
AGTGATAA--CTTT-CAAA--TTCAGA-GAAACCCTGGAATC--AAAAATGGGCAATCCT-GAGCCAAATCCT-GTTTTACAAGAACAAACAAGGGTTCAGAAAGCGAAAAAAAAA-GAAGGGGATAGGTGCAGAGACTCAACGGAAGCTGTTCTAAGAAATGGGGTTGACTGCCTTTTTTGGTAAAGAAAGGAAAAGAAATCCT----------ATCGAAACTCCATAAAGGATGAAGGATAAGCGTATATACACTATGTATACACAATGAAAAACTATCTCAAAAATGACAACCGAATCCGTATTTTTTTT-ATGAAAAAGAAAAGAATTGTTATGAATCAATTCCAAGTTGAAGAAAGAATCGAATATTCATTGATCAAATCATTCACTCCATAGTCTGATCGATCTTTTCTTTTGAAGAACTGATTAATCGGACAAGAATAAAGATAGAGTCCCATTCTACATGTCAATATCAATACCGGCAACAATGAAATTTAGAGTAAGAGGAAAATCCGTCGACTTTAGAAATCGTGAGGGTTCAAG
>CB23
AGTGATAA--CTTT-CAAA--TTCAGA-GAAACCCTGGAATC--AAAAATGGGCAATCCT-GAGCCAAATCCT-GTTTTACAAGAACAAACAAGGGTTCAGAAAGCGAAAAAAAAA-GAAGGGGATAGGTGCAGAGACTCAACGGAAGCTGTTCTAAGAAATGGGGTTGACTGCCTTTTTTGGTAAAGAAAGGAAAAGAAATCCT----------ATCGAAACTCCATAAAGGATGAAGGATAAGCGTATATACACTATGTATACACAATGAAAAACTATCTCAAAAATGACAACCGAATCCGTATTTTTTTT-ATGAAAAAGAAAAGAATTGTTATGAATCAATTCCAAGTTGAAGAAAGAATCGAATATTCATTGATCAAATCATTCACTCCATAGTCTGATCGATCTTTTCTTTTGAAGAACTGATTAATCGGACAAGAATAAAGATAGAGTCCCATTCTACATGTCAATATCAATACCGGCAACAATGAAATTTAGAGTAAGAGGAAAATCCGTCGACTTTAGAAATCGTGAGGGTTCAAG
>XN01
AGTGATAA--CTTT-CAAA--TTCAGA-GAAACCCTGGAATC--AAAAATGGGCAATCCT-GAGCCAAATCCT-GTTTTACAAGAACAAACAAGGGTTCAGAAAGCGAAAAAAAAA-GAAGGGGATAGGTGCAGAGACTCAACGGAAGCTGTTCTAAGAAATGGGGTTGACTGCCTTTTTTGGTAAAGAAAGGAAAAGAAATCCT----------ATCGAAACTCCATAAAGGATGAAGGATAAGCGTATATACACTATGTATACACAATGAAAAACTATCTCAAAAATGACAACCGAATCCGTATTTTTTTT-ATGAAAAAGAAAAGAATTGTTATGAATCAATTCCAAGTTGAAGAAAGAATCGAATATTCATTGATCAAATCATTCACTCCATAGTCTGATCGATCTTTTCTTTTGAAGAACTGATTAATCGGACAAGAATAAAGATAGAGTCCCATTCTACATGTCAATATCAATACCGGCAACAATGAAATTTAGAGTAAGAGGAAAATCCGTCGACTTTAGAAATCGTGAGGGTTCAAG
>XN02
AGTGATAA--CTTT-CAAA--TTCAGA-GAAACCCTGGAATC--AAAAATGGGCAATCCT-GAGCCAAATCCT-GTTTTACAAGAACAAACAAGGGTTCAGAAAGCGAAAAAAAAA-GAAGGGGATAGGTGCAGAGACTCAACGGAAGCTGTTCTAAGAAATGGGGTTGACTGCCTTTTTTGGTAAAGAAAGGAAAAGAAATCCT----------ATCGAAACTCCATAAAGGATGAAGGATAAGCGTATATACACTATGTATACACAATGAAAAACTATCTCAAAAATGACAACCGAATCCGTATTTTTTTT-ATGAAAAAGAAAAGAATTGTTATGAATCAATTCCAAGTTGAAGAAAGAATCGAATATTCATTGATCAAATCATTCACTCCATAGTCTGATCGATCTTTTCTTTTGAAGAACTGATTAATCGGACAAGAATAAAGATAGAGTCCCATTCTACATGTCAATATCAATACCGGCAACAATGAAATTTAGAGTAAGAGGAAAATCCGTCGACTTTAGAAATCGTGAGGGTTCAAG
>XN03
AGTGATAA--CTTT-CAAA--TTCAGA-GAAACCCTGGAATC--AAAAATGGGCAATCCT-GAGCCAAATCCT-GTTTTACAAGAACAAACAAGGGTTCAGAAAGCGAAAAAAAAA-GAAGGGGATAGGTGCAGAGACTCAACGGAAGCTGTTCTAAGAAATGGGGTTGACTGCCTTTTTTGGTAAAGAAAGGAAAAGAAATCCT----------ATCGAAACTCCATAAAGGATGAAGGATAAGCGTATATACACTATGTATACACAATGAAAAACTATCTCAAAAATGACAACCGAATCCGTATTTTTTTT-ATGAAAAAGAAAAGAATTGTTATGAATCAATTCCAAGTTGAAGAAAGAATCGAATATTCATTGATCAAATCATTCACTCCATAGTCTGATCGATCTTTTCTTTTGAAGAACTGATTAATCGGACAAGAATAAAGATAGAGTCCCATTCTACATGTCAATATCAATACCGGCAACAATGAAATTTAGAGTAAGAGGAAAATCCGTCGACTTTAGAAATCGTGAGGGTTCAAG
>XN04
AGTGATAA--CTTT-CAAA--TTCAGA-GAAACCCTGGAATC--AAAAATGGGCAATCCT-GAGCCAAATCCT-GTTTTACAAGAACAAACAAGGGTTCAGAAAGCGAAAAAAAAA-GAAGGGGATAGGTGCAGAGACTCAACGGAAGCTGTTCTAAGAAATGGGGTTGACTGCCTTTTTTGGTAAAGAAAGGAAAAGAAATCCT----------ATCGAAACTCCATAAAGGATGAAGGATAAGCGTATATACACTATGTATACACAATGAAAAACTATCTCAAAAATGACAACCGAATCCGTATTTTTTTT-ATGAAAAAGAAAAGAATTGTTATGAATCAATTCCAAGTTGAAGAAAGAATCGAATATTCATTGATCAAATCATTCACTCCATAGTCTGATCGATCTTTTCTTTTGAAGAACTGATTAATCGGACAAGAATAAAGATAGAGTCCCATTCTACATGTCAATATCAATACCGGCAACAATGAAATTTAGAGTAAGAGGAAAATCCGTCGACTTTAGAAATCGTGAGGGTTCAAG
>XN05
AGTGATAA--CTTT-CAAA--TTCAGA-GAAACCCTGGAATC--AAAAATGGGCAATCCT-GAGCCAAATCCT-GTTTTACAAGAACAAACAAGGGTTCAGAAAGCGAAAAAAAAA-GAAGGGGATAGGTGCAGAGACTCAACGGAAGCTGTTCTAAGAAATGGGGTTGACTGCCTTTTTTGGTAAAGAAAGGAAAAGAAATCCT----------ATCGAAACTCCATAAAGGATGAAGGATAAGCGTATATACACTATGTATACACAATGAAAAACTATCTCAAAAATGACAACCGAATCCGTATTTTTTTT-ATGAAAAAGAAAAGAATTGTTATGAATCAATTCCAAGTTGAAGAAAGAATCGAATATTCATTGATCAAATCATTCACTCCATAGTCTGATCGATCTTTTCTTTTGAAGAACTGATTAATCGGACAAGAATAAAGATAGAGTCCCATTCTACATGTCAATATCAATACCGGCAACAATGAAATTTAGAGTAAGAGGAAAATCCGTCGACTTTAGAAATCGTGAGGGTTCAAG
>XN06
AGTGATAA--CTTT-CAAA--TTCAGA-GAAACCCTGGAATC--AAAAATGGGCAATCCT-GAGCCAAATCCT-GTTTTACAAGAACAAACAAGGGTTCAGAAAGCGAAAAAAAAA-GAAGGGGATAGGTGCAGAGACTCAACGGAAGCTGTTCTAAGAAATGGGGTTGACTGCCTTTTTTGGTAAAGAAAGGAAAAGAAATCCT----------ATCGAAACTCCATAAAGGATGAAGGATAAGCGTATATACACTATGTATACACAATGAAAAACTATCTCAAAAATGACAACCGAATCCGTATTTTTTTT-ATGAAAAAGAAAAGAATTGTTATGAATCAATTCCAAGTTGAAGAAAGAATCGAATATTCATTGATCAAATCATTCACTCCATAGTCTGATCGATCTTTTCTTTTGAAGAACTGATTAATCGGACAAGAATAAAGATAGAGTCCCATTCTACATGTCAATATCAATACCGGCAACAATGAAATTTAGAGTAAGAGGAAAATCCGTCGACTTTAGAAATCGTGAGGGTTCAAG
>XN07
AGTGATAA--CTTT-CAAA--TTCAGA-GAAACCCTGGAATC--AAAAATGGGCAATCCT-GAGCCAAATCCT-GTTTTACAAGAACAAACAAGGGTTCAGAAAGCGAAAAAAAAA-GAAGGGGATAGGTGCAGAGACTCAACGGAAGCTGTTCTAAGAAATGGGGTTGACTGCCTTTTTTGGTAAAGAAAGGAAAAGAAATCCT----------ATCGAAACTCCATAAAGGATGAAGGATAAGCGTATATACACTATGTATACACAATGAAAAACTATCTCAAAAATGACAACCGAATCCGTATTTTTTTT-ATGAAAAAGAAAAGAATTGTTATGAATCAATTCCAAGTTGAAGAAAGAATCGAATATTCATTGATCAAATCATTCACTCCATAGTCTGATCGATCTTTTCTTTTGAAGAACTGATTAATCGGACAAGAATAAAGATAGAGTCCCATTCTACATGTCAATATCAATACCGGCAACAATGAAATTTAGAGTAAGAGGAAAATCCGTCGACTTTAGAAATCGTGAGGGTTCAAG
>XN08
AGTGATAA--CTTT-CAAA--TTCAGA-GAAACCCTGGAATC--AAAAATGGGCAATCCT-GAGCCAAATCCT-GTTTTACAAGAACAAACAAGGGTTCAGAAAGCGAAAAAAAAA-GAAGGGGATAGGTGCAGAGACTCAACGGAAGCTGTTCTAAGAAATGGGGTTGACTGCCTTTTTTGGTAAAGAAAGGAAAAGAAATCCT----------ATCGAAACTCCATAAAGGATGAAGGATAAGCGTATATACACTATGTATACACAATGAAAAACTATCTCAAAAATGACAACCGAATCCGTATTTTTTTT-ATGAAAAAGAAAAGAATTGTTATGAATCAATTCCAAGTTGAAGAAAGAATCGAATATTCATTGATCAAATCATTCACTCCATAGTCTGATCGATCTTTTCTTTTGAAGAACTGATTAATCGGACAAGAATAAAGATAGAGTCCCATTCTACATGTCAATATCAATACCGGCAACAATGAAATTTAGAGTAAGAGGAAAATCCGTCGACTTTAGAAATCGTGAGGGTTCAAG
>XN09
AGTGATAA--CTTT-CAAA--TTCAGA-GAAACCCTGGAATC--AAAAATGGGCAATCCT-GAGCCAAATCCT-GTTTTACAAGAACAAACAAGGGTTCAGAAAGCGAAAAAAAAA-GAAGGGGATAGGTGCAGAGACTCAACGGAAGCTGTTCTAAGAAATGGGGTTGACTGCCTTTTTTGGTAAAGAAAGGAAAAGAAATCCT----------ATCGAAACTCCATAAAGGATGAAGGATAAGCGTATATACACTATGTATACACAATGAAAAACTATCTCAAAAATGACAACCGAATCCGTATTTTTTTT-ATGAAAAAGAAAAGAATTGTTATGAATCAATTCCAAGTTGAAGAAAGAATCGAATATTCATTGATCAAATCATTCACTCCATAGTCTGATCGATCTTTTCTTTTGAAGAACTGATTAATCGGACAAGAATAAAGATAGAGTCCCATTCTACATGTCAATATCAATACCGGCAACAATGAAATTTAGAGTAAGAGGAAAATCCGTCGACTTTAGAAATCGTGAGGGTTCAAG
>XN10
AGTGATAA--CTTT-CAAA--TTCAGA-GAAACCCTGGAATC--AAAAATGGGCAATCCT-GAGCCAAATCCT-GTTTTACAAGAACAAACAAGGGTTCAGAAAGCGAAAAAAAAA-GAAGGGGATAGGTGCAGAGACTCAACGGAAGCTGTTCTAAGAAATGGGGTTGACTGCCTTTTTTGGTAAAGAAAGGAAAAGAAATCCT----------ATCGAAACTCCATAAAGGATGAAGGATAAGCGTATATACACTATGTATACACAATGAAAAACTATCTCAAAAATGACAACCGAATCCGTATTTTTTTT-ATGAAAAAGAAAAGAATTGTTATGAATCAATTCCAAGTTGAAGAAAGAATCGAATATTCATTGATCAAATCATTCACTCCATAGTCTGATCGATCTTTTCTTTTGAAGAACTGATTAATCGGACAAGAATAAAGATAGAGTCCCATTCTACATGTCAATATCAATACCGGCAACAATGAAATTTAGAGTAAGAGGAAAATCCGTCGACTTTAGAAATCGTGAGGGTTCAAG
>XN11
AGTGATAA--CTTT-CAAA--TTCAGA-GAAACCCTGGAATC--AAAAATGGGCAATCCT-GAGCCAAATCCT-GTTTTACAAGAACAAACAAGGGTTCAGAAAGCGAAAAAAAAA-GAAGGGGATAGGTGCAGAGACTCAACGGAAGCTGTTCTAAGAAATGGGGTTGACTGCCTTTTTTGGTAAAGAAAGGAAAAGAAATCCT----------ATCGAAACTCCATAAAGGATGAAGGATAAGCGTATATACACTATGTATACACAATGAAAAACTATCTCAAAAATGACAACCGAATCCGTATTTTTTTT-ATGAAAAAGAAAAGAATTGTTATGAATCAATTCCAAGTTGAAGAAAGAATCGAATATTCATTGATCAAATCATTCACTCCATAGTCTGATCGATCTTTTCTTTTGAAGAACTGATTAATCGGACAAGAATAAAGATAGAGTCCCATTCTACATGTCAATATCAATACCGGCAACAATGAAATTTAGAGTAAGAGGAAAATCCGTCGACTTTAGAAATCGTGAGGGTTCAAG
>NP01
AGTGATAA--CTTT-CAAA--TTCAGA-GAAACCCTGGAATC--AAAAATGGGCAATCCT-GAGCCAAATCCT-GTTTTACAAGAACAAACAAGGGTTCAGAAAGCGAAAAAAAAA-GAAGGGGATAGGTGCAGAGACTCAACGGAAGCTGTTCTAAGAAATGGGGTTGACTGCCTTTTTTGGTAAAGAAAGGAAAAGAAATCCT----------ATCGAAACTCCATAAAGGATGAAGGATAAGCGTATATACACTATGTATACACAATGAAAAACTATCTCAAAAATGACAACCGAATCCGTATTTTTTTT-ATGAAAAAGAAAAGAATTGTTATGAATCAATTCCAAGTTGAAGAAAGAATCGAATATTCATTGATCAAATCATTCACTCCATAGTCTGATCGATCTTTTCTTTTGAAGAACTGATTAATCGGACAAGAATAAAGATAGAGTCCCATTCTACATGTCAATATCAATACCGGCAACAATGAAATTTAGAGTAAGAGGAAAATCCGTCGACTTTAGAAATCGTGAGGGTTCAAG
>NP02
AGTGATAA--CTTT-CAAA--TTCAGA-GAAACCCTGGAATC--AAAAATGGGCAATCCT-GAGCCAAATCCT-GTTTTACAAGAACAAACAAGGGTTCAGAAAGCGAAAAAAAAA-GAAGGGGATAGGTGCAGAGACTCAACGGAAGCTGTTCTAAGAAATGGGGTTGACTGCCTTTTTTGGTAAAGAAAGGAAAAGAAATCCT----------ATCGAAACTCCATAAAGGATGAAGGATAAGCGTATATACACTATGTATACACAATGAAAAACTATCTCAAAAATGACAACCGAATCCGTATTTTTTTT-ATGAAAAAGAAAAGAATTGTTATGAATCAATTCCAAGTTGAAGAAAGAATCGAATATTCATTGATCAAATCATTCACTCCATAGTCTGATCGATCTTTTCTTTTGAAGAACTGATTAATCGGACAAGAATAAAGATAGAGTCCCATTCTACATGTCAATATCAATACCGGCAACAATGAAATTTAGAGTAAGAGGAAAATCCGTCGACTTTAGAAATCGTGAGGGTTCAAG
>NP03
AGTGATAA--CTTT-CAAA--TTCAGA-GAAACCCTGGAATC--AAAAATGGGCAATCCT-GAGCCAAATCCT-GTTTTACAAGAACAAACAAGGGTTCAGAAAGCGAAAAAAAAA-GAAGGGGATAGGTGCAGAGACTCAACGGAAGCTGTTCTAAGAAATGGGGTTGACTGCCTTTTTTGGTAAAGAAAGGAAAAGAAATCCT----------ATCGAAACTCCATAAAGGATGAAGGATAAGCGTATATACACTATGTATACACAATGAAAAACTATCTCAAAAATGACAACCGAATCCGTATTTTTTTT-ATGAAAAAGAAAAGAATTGTTATGAATCAATTCCAAGTTGAAGAAAGAATCGAATATTCATTGATCAAATCATTCACTCCATAGTCTGATCGATCTTTTCTTTTGAAGAACTGATTAATCGGACAAGAATAAAGATAGAGTCCCATTCTACATGTCAATATCAATACCGGCAACAATGAAATTTAGAGTAAGAGGAAAATCCGTCGACTTTAGAAATCGTGAGGGTTCAAG
>NP04
AGTGATAA--CTTT-CAAA--TTCAGA-GAAACCCTGGAATC--AAAAATGGGCAATCCT-GAGCCAAATCCT-GTTTTACAAGAACAAACAAGGGTTCAGAAAGCGAAAAAAAAA-GAAGGGGATAGGTGCAGAGACTCAACGGAAGCTGTTCTAAGAAATGGGGTTGACTGCCTTTTTTGGTAAAGAAAGGAAAAGAAATCCT----------ATCGAAACTCCATAAAGGATGAAGGATAAGCGTATATACACTATGTATACACAATGAAAAACTATCTCAAAAATGACAACCGAATCCGTATTTTTTTT-ATGAAAAAGAAAAGAATTGTTATGAATCAATTCCAAGTTGAAGAAAGAATCGAATATTCATTGATCAAATCATTCACTCCATAGTCTGATCGATCTTTTCTTTTGAAGAACTGATTAATCGGACAAGAATAAAGATAGAGTCCCATTCTACATGTCAATATCAATACCGGCAACAATGAAATTTAGAGTAAGAGGAAAATCCGTCGACTTTAGAAATCGTGAGGGTTCAAG
>NP05
AGTGATAA--CTTT-CAAA--TTCAGA-GAAACCCTGGAATC--AAAAATGGGCAATCCT-GAGCCAAATCCT-GTTTTACAAGAACAAACAAGGGTTCAGAAAGCGAAAAAAAAA-GAAGGGGATAGGTGCAGAGACTCAACGGAAGCTGTTCTAAGAAATGGGGTTGACTGCCTTTTTTGGTAAAGAAAGGAAAAGAAATCCT----------ATCGAAACTCCATAAAGGATGAAGGATAAGCGTATATACACTATGTATACACAATGAAAAACTATCTCAAAAATGACAACCGAATCCGTATTTTTTTT-ATGAAAAAGAAAAGAATTGTTATGAATCAATTCCAAGTTGAAGAAAGAATCGAATATTCATTGATCAAATCATTCACTCCATAGTCTGATCGATCTTTTCTTTTGAAGAACTGATTAATCGGACAAGAATAAAGATAGAGTCCCATTCTACATGTCAATATCAATACCGGCAACAATGAAATTTAGAGTAAGAGGAAAATCCGTCGACTTTAGAAATCGTGAGGGTTCAAG
>NP06
AGTGATAA--CTTT-CAAA--TTCAGA-GAAACCCTGGAATC--AAAAATGGGCAATCCT-GAGCCAAATCCT-GTTTTACAAGAACAAACAAGGGTTCAGAAAGCGAAAAAAAAA-GAAGGGGATAGGTGCAGAGACTCAACGGAAGCTGTTCTAAGAAATGGGGTTGACTGCCTTTTTTGGTAAAGAAAGGAAAAGAAATCCT----------ATCGAAACTCCATAAAGGATGAAGGATAAGCGTATATACACTATGTATACACAATGAAAAACTATCTCAAAAATGACAACCGAATCCGTATTTTTTTT-ATGAAAAAGAAAAGAATTGTTATGAATCAATTCCAAGTTGAAGAAAGAATCGAATATTCATTGATCAAATCATTCACTCCATAGTCTGATCGATCTTTTCTTTTGAAGAACTGATTAATCGGACAAGAATAAAGATAGAGTCCCATTCTACATGTCAATATCAATACCGGCAACAATGAAATTTAGAGTAAGAGGAAAATCCGTCGACTTTAGAAATCGTGAGGGTTCAAG
>NP07
AGTGATAA--CTTT-CAAA--TTCAGA-GAAACCCTGGAATC--AAAAATGGGCAATCCT-GAGCCAAATCCT-GTTTTACAAGAACAAACAAGGGTTCAGAAAGCGAAAAAAAAA-GAAGGGGATAGGTGCAGAGACTCAACGGAAGCTGTTCTAAGAAATGGGGTTGACTGCCTTTTTTGGTAAAGAAAGGAAAAGAAATCCT----------ATCGAAACTCCATAAAGGATGAAGGATAAGCGTATATACACTATGTATACACAATGAAAAACTATCTCAAAAATGACAACCGAATCCGTATTTTTTTT-ATGAAAAAGAAAAGAATTGTTATGAATCAATTCCAAGTTGAAGAAAGAATCGAATATTCATTGATCAAATCATTCACTCCATAGTCTGATCGATCTTTTCTTTTGAAGAACTGATTAATCGGACAAGAATAAAGATAGAGTCCCATTCTACATGTCAATATCAATACCGGCAACAATGAAATTTAGAGTAAGAGGAAAATCCGTCGACTTTAGAAATCGTGAGGGTTCAAG
>NP09
AGTGATAA--CTTT-CAAA--TTCAGA-GAAACCCTGGAATC--AAAAATGGGCAATCCT-GAGCCAAATCCT-GTTTTACAAGAACAAACAAGGGTTCAGAAAGCGAAAAAAAAA-GAAGGGGATAGGTGCAGAGACTCAACGGAAGCTGTTCTAAGAAATGGGGTTGACTGCCTTTTTTGGTAAAGAAAGGAAAAGAAATCCT----------ATCGAAACTCCATAAAGGATGAAGGATAAGCGTATATACACTATGTATACACAATGAAAAACTATCTCAAAAATGACAACCGAATCCGTATTTTTTTT-ATGAAAAAGAAAAGAATTGTTATGAATCAATTCCAAGTTGAAGAAAGAATCGAATATTCATTGATCAAATCATTCACTCCATAGTCTGATCGATCTTTTCTTTTGAAGAACTGATTAATCGGACAAGAATAAAGATAGAGTCCCATTCTACATGTCAATATCAATACCGGCAACAATGAAATTTAGAGTAAGAGGAAAATCCGTCGACTTTAGAAATCGTGAGGGTTCAAG
>NP10
AGTGATAA--CTTT-CAAA--TTCAGA-GAAACCCTGGAATC--AAAAATGGGCAATCCT-GAGCCAAATCCT-GTTTTACAAGAACAAACAAGGGTTCAGAAAGCGAAAAAAAAA-GAAGGGGATAGGTGCAGAGACTCAACGGAAGCTGTTCTAAGAAATGGGGTTGACTGCCTTTTTTGGTAAAGAAAGGAAAAGAAATCCT----------ATCGAAACTCCATAAAGGATGAAGGATAAGCGTATATACACTATGTATACACAATGAAAAACTATCTCAAAAATGACAACCGAATCCGTATTTTTTTT-ATGAAAAAGAAAAGAATTGTTATGAATCAATTCCAAGTTGAAGAAAGAATCGAATATTCATTGATCAAATCATTCACTCCATAGTCTGATCGATCTTTTCTTTTGAAGAACTGATTAATCGGACAAGAATAAAGATAGAGTCCCATTCTACATGTCAATATCAATACCGGCAACAATGAAATTTAGAGTAAGAGGAAAATCCGTCGACTTTAGAAATCGTGAGGGTTCAAG
>JL01
AGTGATAA--CTTT-CAAA--TTCAGA-GAAACCCTGGAATC--AAAAATGGGCAATCCT-GAGCCAAATCCT-GTTTTACAAGAACAAACAAGGGTTCAGAAAGCGAAAAAAAAA-GAAGGGGATAGGTGCAGAGACTCAACGGAAGCTGTTCTAAGAAATGGGGTTGACTGCCTTTTTTGGTAAAGAAAGGAAAAGAAATCCT----------ATCGAAACTCCATAAAGGATGAAGGATAAGCGTATATACACTATGTATACACAATGAAAAACTATCTCAAAAATGACAACCGAATCCGTATTTTTTTT-ATGAAAAAGAAAAGAATTGTTATGAATCAATTCCAAGTTGAAGAAAGAATCGAATATTCATTGATCAAATCATTCACTCCATAGTCTGATCGATCTTTTCTTTTGAAGAACTGATTAATCGGACAAGAATAAAGATAGAGTCCCATTCTACATGTCAATATCAATACCGGCAACAATGAAATTTAGAGTAAGAGGAAAATCCGTCGACTTTAGAAATCGTGAGGGTTCAAG
>JL02
AGTGATAA--CTTT-CAAA--TTCAGA-GAAACCCTGGAATC--AAAAATGGGCAATCCT-GAGCCAAATCCT-GTTTTACAAGAACAAACAAGGGTTCAGAAAGCGAAAAAAAAA-GAAGGGGATAGGTGCAGAGACTCAACGGAAGCTGTTCTAAGAAATGGGGTTGACTGCCTTTTTTGGTAAAGAAAGGAAAAGAAATCCT----------ATCGAAACTCCATAAAGGATGAAGGATAAGCGTATATACACTATGTATACACAATGAAAAACTATCTCAAAAATGACAACCGAATCCGTATTTTTTTT-ATGAAAAAGAAAAGAATTGTTATGAATCAATTCCAAGTTGAAGAAAGAATCGAATATTCATTGATCAAATCATTCACTCCATAGTCTGATCGATCTTTTCTTTTGAAGAACTGATTAATCGGACAAGAATAAAGATAGAGTCCCATTCTACATGTCAATATCAATACCGGCAACAATGAAATTTAGAGTAAGAGGAAAATCCGTCGACTTTAGAAATCGTGAGGGTTCAAG
>JL03
AGTGATAA--CTTT-CAAA--TTCAGA-GAAACCCTGGAATC--AAAAATGGGCAATCCT-GAGCCAAATCCT-GTTTTACAAGAACAAACAAGGGTTCAGAAAGCGAAAAAAAAA-GAAGGGGATAGGTGCAGAGACTCAACGGAAGCTGTTCTAAGAAATGGGGTTGACTGCCTTTTTTGGTAAAGAAAGGAAAAGAAATCCT----------ATCGAAACTCCATAAAGGATGAAGGATAAGCGTATATACACTATGTATACACAATGAAAAACTATCTCAAAAATGACAACCGAATCCGTATTTTTTTT-ATGAAAAAGAAAAGAATTGTTATGAATCAATTCCAAGTTGAAGAAAGAATCGAATATTCATTGATCAAATCATTCACTCCATAGTCTGATCGATCTTTTCTTTTGAAGAACTGATTAATCGGACAAGAATAAAGATAGAGTCCCATTCTACATGTCAATATCAATACCGGCAACAATGAAATTTAGAGTAAGAGGAAAATCCGTCGACTTTAGAAATCGTGAGGGTTCAAG
>JL04
AGTGATAA--CTTT-CAAA--TTCAGA-GAAACCCTGGAATC--AAAAATGGGCAATCCT-GAGCCAAATCCT-GTTTTACAAGAACAAACAAGGGTTCAGAAAGCGAAAAAAAAA-GAAGGGGATAGGTGCAGAGACTCAACGGAAGCTGTTCTAAGAAATGGGGTTGACTGCCTTTTTTGGTAAAGAAAGGAAAAGAAATCCT----------ATCGAAACTCCATAAAGGATGAAGGATAAGCGTATATACACTATGTATACACAATGAAAAACTATCTCAAAAATGACAACCGAATCCGTATTTTTTTT-ATGAAAAAGAAAAGAATTGTTATGAATCAATTCCAAGTTGAAGAAAGAATCGAATATTCATTGATCAAATCATTCACTCCATAGTCTGATCGATCTTTTCTTTTGAAGAACTGATTAATCGGACAAGAATAAAGATAGAGTCCCATTCTACATGTCAATATCAATACCGGCAACAATGAAATTTAGAGTAAGAGGAAAATCCGTCGACTTTAGAAATCGTGAGGGTTCAAG
>JL05
AGTGATAA--CTTT-CAAA--TTCAGA-GAAACCCTGGAATC--AAAAATGGGCAATCCT-GAGCCAAATCCT-GTTTTACAAGAACAAACAAGGGTTCAGAAAGCGAAAAAAAAA-GAAGGGGATAGGTGCAGAGACTCAACGGAAGCTGTTCTAAGAAATGGGGTTGACTGCCTTTTTTGGTAAAGAAAGGAAAAGAAATCCT----------ATCGAAACTCCATAAAGGATGAAGGATAAGCGTATATACACTATGTATACACAATGAAAAACTATCTCAAAAATGACAACCGAATCCGTATTTTTTTT-ATGAAAAAGAAAAGAATTGTTATGAATCAATTCCAAGTTGAAGAAAGAATCGAATATTCATTGATCAAATCATTCACTCCATAGTCTGATCGATCTTTTCTTTTGAAGAACTGATTAATCGGACAAGAATAAAGATAGAGTCCCATTCTACATGTCAATATCAATACCGGCAACAATGAAATTTAGAGTAAGAGGAAAATCCGTCGACTTTAGAAATCGTGAGGGTTCAAG
>JL06
AGTGATAA--CTTT-CAAA--TTCAGA-GAAACCCTGGAATC--AAAAATGGGCAATCCT-GAGCCAAATCCT-GTTTTACAAGAACAAACAAGGGTTCAGAAAGCGAAAAAAAAA-GAAGGGGATAGGTGCAGAGACTCAACGGAAGCTGTTCTAAGAAATGGGGTTGACTGCCTTTTTTGGTAAAGAAAGGAAAAGAAATCCT----------ATCGAAACTCCATAAAGGATGAAGGATAAGCGTATATACACTATGTATACACAATGAAAAACTATCTCAAAAATGACAACCGAATCCGTATTTTTTTT-ATGAAAAAGAAAAGAATTGTTATGAATCAATTCCAAGTTGAAGAAAGAATCGAATATTCATTGATCAAATCATTCACTCCATAGTCTGATCGATCTTTTCTTTTGAAGAACTGATTAATCGGACAAGAATAAAGATAGAGTCCCATTCTACATGTCAATATCAATACCGGCAACAATGAAATTTAGAGTAAGAGGAAAATCCGTCGACTTTAGAAATCGTGAGGGTTCAAG
>JL07
AGTGATAA--CTTT-CAAA--TTCAGA-GAAACCCTGGAATC--AAAAATGGGCAATCCT-GAGCCAAATCCT-GTTTTACAAGAACAAACAAGGGTTCAGAAAGCGAAAAAAAAA-GAAGGGGATAGGTGCAGAGACTCAACGGAAGCTGTTCTAAGAAATGGGGTTGACTGCCTTTTTTGGTAAAGAAAGGAAAAGAAATCCT----------ATCGAAACTCCATAAAGGATGAAGGATAAGCGTATATACACTATGTATACACAATGAAAAACTATCTCAAAAATGACAACCGAATCCGTATTTTTTTT-ATGAAAAAGAAAAGAATTGTTATGAATCAATTCCAAGTTGAAGAAAGAATCGAATATTCATTGATCAAATCATTCACTCCATAGTCTGATCGATCTTTTCTTTTGAAGAACTGATTAATCGGACAAGAATAAAGATAGAGTCCCATTCTACATGTCAATATCAATACCGGCAACAATGAAATTTAGAGTAAGAGGAAAATCCGTCGACTTTAGAAATCGTGAGGGTTCAAG
>JL08
AGTGATAA--CTTT-CAAA--TTCAGA-GAAACCCTGGAATC--AAAAATGGGCAATCCT-GAGCCAAATCCT-GTTTTACAAGAACAAACAAGGGTTCAGAAAGCGAAAAAAAAA-GAAGGGGATAGGTGCAGAGACTCAACGGAAGCTGTTCTAAGAAATGGGGTTGACTGCCTTTTTTGGTAAAGAAAGGAAAAGAAATCCT----------ATCGAAACTCCATAAAGGATGAAGGATAAGCGTATATACACTATGTATACACAATGAAAAACTATCTCAAAAATGACAACCGAATCCGTATTTTTTTT-ATGAAAAAGAAAAGAATTGTTATGAATCAATTCCAAGTTGAAGAAAGAATCGAATATTCATTGATCAAATCATTCACTCCATAGTCTGATCGATCTTTTCTTTTGAAGAACTGATTAATCGGACAAGAATAAAGATAGAGTCCCATTCTACATGTCAATATCAATACCGGCAACAATGAAATTTAGAGTAAGAGGAAAATCCGTCGACTTTAGAAATCGTGAGGGTTCAAG
>JL09
AGTGATAA--CTTT-CAAA--TTCAGA-GAAACCCTGGAATC--AAAAATGGGCAATCCT-GAGCCAAATCCT-GTTTTACAAGAACAAACAAGGGTTCAGAAAGCGAAAAAAAAA-GAAGGGGATAGGTGCAGAGACTCAACGGAAGCTGTTCTAAGAAATGGGGTTGACTGCCTTTTTTGGTAAAGAAAGGAAAAGAAATCCT----------ATCGAAACTCCATAAAGGATGAAGGATAAGCGTATATACACTATGTATACACAATGAAAAACTATCTCAAAAATGACAACCGAATCCGTATTTTTTTT-ATGAAAAAGAAAAGAATTGTTATGAATCAATTCCAAGTTGAAGAAAGAATCGAATATTCATTGATCAAATCATTCACTCCATAGTCTGATCGATCTTTTCTTTTGAAGAACTGATTAATCGGACAAGAATAAAGATAGAGTCCCATTCTACATGTCAATATCAATACCGGCAACAATGAAATTTAGAGTAAGAGGAAAATCCGTCGACTTTAGAAATCGTGAGGGTTCAAG
>JL10
AGTGATAA--CTTT-CAAA--TTCAGA-GAAACCCTGGAATC--AAAAATGGGCAATCCT-GAGCCAAATCCT-GTTTTACAAGAACAAACAAGGGTTCAGAAAGCGAAAAAAAAA-GAAGGGGATAGGTGCAGAGACTCAACGGAAGCTGTTCTAAGAAATGGGGTTGACTGCCTTTTTTGGTAAAGAAAGGAAAAGAAATCCT----------ATCGAAACTCCATAAAGGATGAAGGATAAGCGTATATACACTATGTATACACAATGAAAAACTATCTCAAAAATGACAACCGAATCCGTATTTTTTTT-ATGAAAAAGAAAAGAATTGTTATGAATCAATTCCAAGTTGAAGAAAGAATCGAATATTCATTGATCAAATCATTCACTCCATAGTCTGATCGATCTTTTCTTTTGAAGAACTGATTAATCGGACAAGAATAAAGATAGAGTCCCATTCTACATGTCAATATCAATACCGGCAACAATGAAATTTAGAGTAAGAGGAAAATCCGTCGACTTTAGAAATCGTGAGGGTTCAAG
>JL11
AGTGATAA--CTTT-CAAA--TTCAGA-GAAACCCTGGAATC--AAAAATGGGCAATCCT-GAGCCAAATCCT-GTTTTACAAGAACAAACAAGGGTTCAGAAAGCGAAAAAAAAA-GAAGGGGATAGGTGCAGAGACTCAACGGAAGCTGTTCTAAGAAATGGGGTTGACTGCCTTTTTTGGTAAAGAAAGGAAAAGAAATCCT----------ATCGAAACTCCATAAAGGATGAAGGATAAGCGTATATACACTATGTATACACAATGAAAAACTATCTCAAAAATGACAACCGAATCCGTATTTTTTTT-ATGAAAAAGAAAAGAATTGTTATGAATCAATTCCAAGTTGAAGAAAGAATCGAATATTCATTGATCAAATCATTCACTCCATAGTCTGATCGATCTTTTCTTTTGAAGAACTGATTAATCGGACAAGAATAAAGATAGAGTCCCATTCTACATGTCAATATCAATACCGGCAACAATGAAATTTAGAGTAAGAGGAAAATCCGTCGACTTTAGAAATCGTGAGGGTTCAAG
>JL12
AGTGATAA--CTTT-CAAA--TTCAGA-GAAACCCTGGAATC--AAAAATGGGCAATCCT-GAGCCAAATCCT-GTTTTACAAGAACAAACAAGGGTTCAGAAAGCGAAAAAAAAA-GAAGGGGATAGGTGCAGAGACTCAACGGAAGCTGTTCTAAGAAATGGGGTTGACTGCCTTTTTTGGTAAAGAAAGGAAAAGAAATCCT----------ATCGAAACTCCATAAAGGATGAAGGATAAGCGTATATACACTATGTATACACAATGAAAAACTATCTCAAAAATGACAACCGAATCCGTATTTTTTTT-ATGAAAAAGAAAAGAATTGTTATGAATCAATTCCAAGTTGAAGAAAGAATCGAATATTCATTGATCAAATCATTCACTCCATAGTCTGATCGATCTTTTCTTTTGAAGAACTGATTAATCGGACAAGAATAAAGATAGAGTCCCATTCTACATGTCAATATCAATACCGGCAACAATGAAATTTAGAGTAAGAGGAAAATCCGTCGACTTTAGAAATCGTGAGGGTTCAAG
>JL13
AGTGATAA--CTTT-CAAA--TTCAGA-GAAACCCTGGAATC--AAAAATGGGCAATCCT-GAGCCAAATCCT-GTTTTACAAGAACAAACAAGGGTTCAGAAAGCGAAAAAAAAA-GAAGGGGATAGGTGCAGAGACTCAACGGAAGCTGTTCTAAGAAATGGGGTTGACTGCCTTTTTTGGTAAAGAAAGGAAAAGAAATCCT----------ATCGAAACTCCATAAAGGATGAAGGATAAGCGTATATACACTATGTATACACAATGAAAAACTATCTCAAAAATGACAACCGAATCCGTATTTTTTTT-ATGAAAAAGAAAAGAATTGTTATGAATCAATTCCAAGTTGAAGAAAGAATCGAATATTCATTGATCAAATCATTCACTCCATAGTCTGATCGATCTTTTCTTTTGAAGAACTGATTAATCGGACAAGAATAAAGATAGAGTCCCATTCTACATGTCAATATCAATACCGGCAACAATGAAATTTAGAGTAAGAGGAAAATCCGTCGACTTTAGAAATCGTGAGGGTTCAAG
>JL14
AGTGATAA--CTTT-CAAA--TTCAGA-GAAACCCTGGAATC--AAAAATGGGCAATCCT-GAGCCAAATCCT-GTTTTACAAGAACAAACAAGGGTTCAGAAAGCGAAAAAAAAA-GAAGGGGATAGGTGCAGAGACTCAACGGAAGCTGTTCTAAGAAATGGGGTTGACTGCCTTTTTTGGTAAAGAAAGGAAAAGAAATCCT----------ATCGAAACTCCATAAAGGATGAAGGATAAGCGTATATACACTATGTATACACAATGAAAAACTATCTCAAAAATGACAACCGAATCCGTATTTTTTTT-ATGAAAAAGAAAAGAATTGTTATGAATCAATTCCAAGTTGAAGAAAGAATCGAATATTCATTGATCAAATCATTCACTCCATAGTCTGATCGATCTTTTCTTTTGAAGAACTGATTAATCGGACAAGAATAAAGATAGAGTCCCATTCTACATGTCAATATCAATACCGGCAACAATGAAATTTAGAGTAAGAGGAAAATCCGTCGACTTTAGAAATCGTGAGGGTTCAAG
>JL15
AGTGATAA--CTTT-CAAA--TTCAGA-GAAACCCTGGAATC--AAAAATGGGCAATCCT-GAGCCAAATCCT-GTTTTACAAGAACAAACAAGGGTTCAGAAAGCGAAAAAAAAA-GAAGGGGATAGGTGCAGAGACTCAACGGAAGCTGTTCTAAGAAATGGGGTTGACTGCCTTTTTTGGTAAAGAAAGGAAAAGAAATCCT----------ATCGAAACTCCATAAAGGATGAAGGATAAGCGTATATACACTATGTATACACAATGAAAAACTATCTCAAAAATGACAACCGAATCCGTATTTTTTTT-ATGAAAAAGAAAAGAATTGTTATGAATCAATTCCAAGTTGAAGAAAGAATCGAATATTCATTGATCAAATCATTCACTCCATAGTCTGATCGATCTTTTCTTTTGAAGAACTGATTAATCGGACAAGAATAAAGATAGAGTCCCATTCTACATGTCAATATCAATACCGGCAACAATGAAATTTAGAGTAAGAGGAAAATCCGTCGACTTTAGAAATCGTGAGGGTTCAAG
>JL16
AGTGATAA--CTTT-CAAA--TTCAGA-GAAACCCTGGAATC--AAAAATGGGCAATCCT-GAGCCAAATCCT-GTTTTACAAGAACAAACAAGGGTTCAGAAAGCGAAAAAAAAA-GAAGGGGATAGGTGCAGAGACTCAACGGAAGCTGTTCTAAGAAATGGGGTTGACTGCCTTTTTTGGTAAAGAAAGGAAAAGAAATCCT----------ATCGAAACTCCATAAAGGATGAAGGATAAGCGTATATACACTATGTATACACAATGAAAAACTATCTCAAAAATGACAACCGAATCCGTATTTTTTTT-ATGAAAAAGAAAAGAATTGTTATGAATCAATTCCAAGTTGAAGAAAGAATCGAATATTCATTGATCAAATCATTCACTCCATAGTCTGATCGATCTTTTCTTTTGAAGAACTGATTAATCGGACAAGAATAAAGATAGAGTCCCATTCTACATGTCAATATCAATACCGGCAACAATGAAATTTAGAGTAAGAGGAAAATCCGTCGACTTTAGAAATCGTGAGGGTTCAAG
>JL17
AGTGATAA--CTTT-CAAA--TTCAGA-GAAACCCTGGAATC--AAAAATGGGCAATCCT-GAGCCAAATCCT-GTTTTACAAGAACAAACAAGGGTTCAGAAAGCGAAAAAAAAA-GAAGGGGATAGGTGCAGAGACTCAACGGAAGCTGTTCTAAGAAATGGGGTTGACTGCCTTTTTTGGTAAAGAAAGGAAAAGAAATCCT----------ATCGAAACTCCATAAAGGATGAAGGATAAGCGTATATACACTATGTATACACAATGAAAAACTATCTCAAAAATGACAACCGAATCCGTATTTTTTTT-ATGAAAAAGAAAAGAATTGTTATGAATCAATTCCAAGTTGAAGAAAGAATCGAATATTCATTGATCAAATCATTCACTCCATAGTCTGATCGATCTTTTCTTTTGAAGAACTGATTAATCGGACAAGAATAAAGATAGAGTCCCATTCTACATGTCAATATCAATACCGGCAACAATGAAATTTAGAGTAAGAGGAAAATCCGTCGACTTTAGAAATCGTGAGGGTTCAAG
>JL18
AGTGATAA--CTTT-CAAA--TTCAGA-GAAACCCTGGAATC--AAAAATGGGCAATCCT-GAGCCAAATCCT-GTTTTACAAGAACAAACAAGGGTTCAGAAAGCGAAAAAAAAA-GAAGGGGATAGGTGCAGAGACTCAACGGAAGCTGTTCTAAGAAATGGGGTTGACTGCCTTTTTTGGTAAAGAAAGGAAAAGAAATCCT----------ATCGAAACTCCATAAAGGATGAAGGATAAGCGTATATACACTATGTATACACAATGAAAAACTATCTCAAAAATGACAACCGAATCCGTATTTTTTTT-ATGAAAAAGAAAAGAATTGTTATGAATCAATTCCAAGTTGAAGAAAGAATCGAATATTCATTGATCAAATCATTCACTCCATAGTCTGATCGATCTTTTCTTTTGAAGAACTGATTAATCGGACAAGAATAAAGATAGAGTCCCATTCTACATGTCAATATCAATACCGGCAACAATGAAATTTAGAGTAAGAGGAAAATCCGTCGACTTTAGAAATCGTGAGGGTTCAAG
>JX01
AGTGATAA--CTTT-CAAA--TTCAGA-GAAACCCTGGAATC--AAAAATGGGCAATCCT-GAGCCAAATCCT-GTTTTACAAGAACAAACAAGGGTTCAGAAAGCGAAAAAAAAA-GAAGGGGATAGGTGCAGAGACTCAACGGAAGCTGTTCTAAGAAATGGGGTTGACTGCCTTTTTTGGTAAAGAAAGGAAAAGAAATCCT----------ATCGAAACTCCATAAAGGATGAAGGATAAGCGTATATACACTATGTATACACAATGAAAAACTATCTCAAAAATGACAACCGAATCCGTATTTTTTTT-ATGAAAAAGAAAAGAATTGTTATGAATCAATTCCAAGTTGAAGAAAGAATCGAATATTCATTGATCAAATCATTCACTCCATAGTCTGATCGATCTTTTCTTTTGAAGAACTGATTAATCGGACAAGAATAAAGATAGAGTCCCATTCTACATGTCAATATCAATACCGGCAACAATGAAATTTAGAGTAAGAGGAAAATCCGTCGACTTTAGAAATCGTGAGGGTTCAAG
>JX02
AGTGATAA--CTTT-CAAA--TTCAGA-GAAACCCTGGAATC--AAAAATGGGCAATCCT-GAGCCAAATCCT-GTTTTACAAGAACAAACAAGGGTTCAGAAAGCGAAAAAAAAA-GAAGGGGATAGGTGCAGAGACTCAACGGAAGCTGTTCTAAGAAATGGGGTTGACTGCCTTTTTTGGTAAAGAAAGGAAAAGAAATCCT----------ATCGAAACTCCATAAAGGATGAAGGATAAGCGTATATACACTATGTATACACAATGAAAAACTATCTCAAAAATGACAACCGAATCCGTATTTTTTTT-ATGAAAAAGAAAAGAATTGTTATGAATCAATTCCAAGTTGAAGAAAGAATCGAATATTCATTGATCAAATCATTCACTCCATAGTCTGATCGATCTTTTCTTTTGAAGAACTGATTAATCGGACAAGAATAAAGATAGAGTCCCATTCTACATGTCAATATCAATACCGGCAACAATGAAATTTAGAGTAAGAGGAAAATCCGTCGACTTTAGAAATCGTGAGGGTTCAAG
>JX03
AGTGATAA--CTTT-CAAA--TTCAGA-GAAACCCTGGAATC--AAAAATGGGCAATCCT-GAGCCAAATCCT-GTTTTACAAGAACAAACAAGGGTTCAGAAAGCGAAAAAAAAA-GAAGGGGATAGGTGCAGAGACTCAACGGAAGCTGTTCTAAGAAATGGGGTTGACTGCCTTTTTTGGTAAAGAAAGGAAAAGAAATCCT----------ATCGAAACTCCATAAAGGATGAAGGATAAGCGTATATACACTATGTATACACAATGAAAAACTATCTCAAAAATGACAACCGAATCCGTATTTTTTTT-ATGAAAAAGAAAAGAATTGTTATGAATCAATTCCAAGTTGAAGAAAGAATCGAATATTCATTGATCAAATCATTCACTCCATAGTCTGATCGATCTTTTCTTTTGAAGAACTGATTAATCGGACAAGAATAAAGATAGAGTCCCATTCTACATGTCAATATCAATACCGGCAACAATGAAATTTAGAGTAAGAGGAAAATCCGTCGACTTTAGAAATCGTGAGGGTTCAAG
>JX04
AGTGATAA--CTTT-CAAA--TTCAGA-GAAACCCTGGAATC--AAAAATGGGCAATCCT-GAGCCAAATCCT-GTTTTACAAGAACAAACAAGGGTTCAGAAAGCGAAAAAAAAA-GAAGGGGATAGGTGCAGAGACTCAACGGAAGCTGTTCTAAGAAATGGGGTTGACTGCCTTTTTTGGTAAAGAAAGGAAAAGAAATCCT----------ATCGAAACTCCATAAAGGATGAAGGATAAGCGTATATACACTATGTATACACAATGAAAAACTATCTCAAAAATGACAACCGAATCCGTATTTTTTTT-ATGAAAAAGAAAAGAATTGTTATGAATCAATTCCAAGTTGAAGAAAGAATCGAATATTCATTGATCAAATCATTCACTCCATAGTCTGATCGATCTTTTCTTTTGAAGAACTGATTAATCGGACAAGAATAAAGATAGAGTCCCATTCTACATGTCAATATCAATACCGGCAACAATGAAATTTAGAGTAAGAGGAAAATCCGTCGACTTTAGAAATCGTGAGGGTTCAAG
>JX05
AGTGATAA--CTTT-CAAA--TTCAGA-GAAACCCTGGAATC--AAAAATGGGCAATCCT-GAGCCAAATCCT-GTTTTACAAGAACAAACAAGGGTTCAGAAAGCGAAAAAAAAA-GAAGGGGATAGGTGCAGAGACTCAACGGAAGCTGTTCTAAGAAATGGGGTTGACTGCCTTTTTTGGTAAAGAAAGGAAAAGAAATCCT----------ATCGAAACTCCATAAAGGATGAAGGATAAGCGTATATACACTATGTATACACAATGAAAAACTATCTCAAAAATGACAACCGAATCCGTATTTTTTTT-ATGAAAAAGAAAAGAATTGTTATGAATCAATTCCAAGTTGAAGAAAGAATCGAATATTCATTGATCAAATCATTCACTCCATAGTCTGATCGATCTTTTCTTTTGAAGAACTGATTAATCGGACAAGAATAAAGATAGAGTCCCATTCTACATGTCAATATCAATACCGGCAACAATGAAATTTAGAGTAAGAGGAAAATCCGTCGACTTTAGAAATCGTGAGGGTTCAAG
>JX06
AGTGATAA--CTTT-CAAA--TTCAGA-GAAACCCTGGAATC--AAAAATGGGCAATCCT-GAGCCAAATCCT-GTTTTACAAGAACAAACAAGGGTTCAGAAAGCGAAAAAAAAA-GAAGGGGATAGGTGCAGAGACTCAACGGAAGCTGTTCTAAGAAATGGGGTTGACTGCCTTTTTTGGTAAAGAAAGGAAAAGAAATCCT----------ATCGAAACTCCATAAAGGATGAAGGATAAGCGTATATACACTATGTATACACAATGAAAAACTATCTCAAAAATGACAACCGAATCCGTATTTTTTTT-ATGAAAAAGAAAAGAATTGTTATGAATCAATTCCAAGTTGAAGAAAGAATCGAATATTCATTGATCAAATCATTCACTCCATAGTCTGATCGATCTTTTCTTTTGAAGAACTGATTAATCGGACAAGAATAAAGATAGAGTCCCATTCTACATGTCAATATCAATACCGGCAACAATGAAATTTAGAGTAAGAGGAAAATCCGTCGACTTTAGAAATCGTGAGGGTTCAAG
>JX07
AGTGATAA--CTTT-CAAA--TTCAGA-GAAACCCTGGAATC--AAAAATGGGCAATCCT-GAGCCAAATCCT-GTTTTACAAGAACAAACAAGGGTTCAGAAAGCGAAAAAAAAA-GAAGGGGATAGGTGCAGAGACTCAACGGAAGCTGTTCTAAGAAATGGGGTTGACTGCCTTTTTTGGTAAAGAAAGGAAAAGAAATCCT----------ATCGAAACTCCATAAAGGATGAAGGATAAGCGTATATACACTATGTATACACAATGAAAAACTATCTCAAAAATGACAACCGAATCCGTATTTTTTTT-ATGAAAAAGAAAAGAATTGTTATGAATCAATTCCAAGTTGAAGAAAGAATCGAATATTCATTGATCAAATCATTCACTCCATAGTCTGATCGATCTTTTCTTTTGAAGAACTGATTAATCGGACAAGAATAAAGATAGAGTCCCATTCTACATGTCAATATCAATACCGGCAACAATGAAATTTAGAGTAAGAGGAAAATCCGTCGACTTTAGAAATCGTGAGGGTTCAAG
>JX08
AGTGATAA--CTTT-CAAA--TTCAGA-GAAACCCTGGAATC--AAAAATGGGCAATCCT-GAGCCAAATCCT-GTTTTACAAGAACAAACAAGGGTTCAGAAAGCGAAAAAAAAA-GAAGGGGATAGGTGCAGAGACTCAACGGAAGCTGTTCTAAGAAATGGGGTTGACTGCCTTTTTTGGTAAAGAAAGGAAAAGAAATCCT----------ATCGAAACTCCATAAAGGATGAAGGATAAGCGTATATACACTATGTATACACAATGAAAAACTATCTCAAAAATGACAACCGAATCCGTATTTTTTTT-ATGAAAAAGAAAAGAATTGTTATGAATCAATTCCAAGTTGAAGAAAGAATCGAATATTCATTGATCAAATCATTCACTCCATAGTCTGATCGATCTTTTCTTTTGAAGAACTGATTAATCGGACAAGAATAAAGATAGAGTCCCATTCTACATGTCAATATCAATACCGGCAACAATGAAATTTAGAGTAAGAGGAAAATCCGTCGACTTTAGAAATCGTGAGGGTTCAAG
>JX09
AGTGATAA--CTTT-CAAA--TTCAGA-GAAACCCTGGAATC--AAAAATGGGCAATCCT-GAGCCAAATCCT-GTTTTACAAGAACAAACAAGGGTTCAGAAAGCGAAAAAAAAA-GAAGGGGATAGGTGCAGAGACTCAACGGAAGCTGTTCTAAGAAATGGGGTTGACTGCCTTTTTTGGTAAAGAAAGGAAAAGAAATCCT----------ATCGAAACTCCATAAAGGATGAAGGATAAGCGTATATACACTATGTATACACAATGAAAAACTATCTCAAAAATGACAACCGAATCCGTATTTTTTTT-ATGAAAAAGAAAAGAATTGTTATGAATCAATTCCAAGTTGAAGAAAGAATCGAATATTCATTGATCAAATCATTCACTCCATAGTCTGATCGATCTTTTCTTTTGAAGAACTGATTAATCGGACAAGAATAAAGATAGAGTCCCATTCTACATGTCAATATCAATACCGGCAACAATGAAATTTAGAGTAAGAGGAAAATCCGTCGACTTTAGAAATCGTGAGGGTTCAAG
>JX10
AGTGATAA--CTTT-CAAA--TTCAGA-GAAACCCTGGAATC--AAAAATGGGCAATCCT-GAGCCAAATCCT-GTTTTACAAGAACAAACAAGGGTTCAGAAAGCGAAAAAAAAA-GAAGGGGATAGGTGCAGAGACTCAACGGAAGCTGTTCTAAGAAATGGGGTTGACTGCCTTTTTTGGTAAAGAAAGGAAAAGAAATCCT----------ATCGAAACTCCATAAAGGATGAAGGATAAGCGTATATACACTATGTATACACAATGAAAAACTATCTCAAAAATGACAACCGAATCCGTATTTTTTTT-ATGAAAAAGAAAAGAATTGTTATGAATCAATTCCAAGTTGAAGAAAGAATCGAATATTCATTGATCAAATCATTCACTCCATAGTCTGATCGATCTTTTCTTTTGAAGAACTGATTAATCGGACAAGAATAAAGATAGAGTCCCATTCTACATGTCAATATCAATACCGGCAACAATGAAATTTAGAGTAAGAGGAAAATCCGTCGACTTTAGAAATCGTGAGGGTTCAAG
>JX11
AGTGATAA--CTTT-CAAA--TTCAGA-GAAACCCTGGAATC--AAAAATGGGCAATCCT-GAGCCAAATCCT-GTTTTACAAGAACAAACAAGGGTTCAGAAAGCGAAAAAAAAA-GAAGGGGATAGGTGCAGAGACTCAACGGAAGCTGTTCTAAGAAATGGGGTTGACTGCCTTTTTTGGTAAAGAAAGGAAAAGAAATCCT----------ATCGAAACTCCATAAAGGATGAAGGATAAGCGTATATACACTATGTATACACAATGAAAAACTATCTCAAAAATGACAACCGAATCCGTATTTTTTTT-ATGAAAAAGAAAAGAATTGTTATGAATCAATTCCAAGTTGAAGAAAGAATCGAATATTCATTGATCAAATCATTCACTCCATAGTCTGATCGATCTTTTCTTTTGAAGAACTGATTAATCGGACAAGAATAAAGATAGAGTCCCATTCTACATGTCAATATCAATACCGGCAACAATGAAATTTAGAGTAAGAGGAAAATCCGTCGACTTTAGAAATCGTGAGGGTTCAAG
>JX12
AGTGATAA--CTTT-CAAA--TTCAGA-GAAACCCTGGAATC--AAAAATGGGCAATCCT-GAGCCAAATCCT-GTTTTACAAGAACAAACAAGGGTTCAGAAAGCGAAAAAAAAA-GAAGGGGATAGGTGCAGAGACTCAACGGAAGCTGTTCTAAGAAATGGGGTTGACTGCCTTTTTTGGTAAAGAAAGGAAAAGAAATCCT----------ATCGAAACTCCATAAAGGATGAAGGATAAGCGTATATACACTATGTATACACAATGAAAAACTATCTCAAAAATGACAACCGAATCCGTATTTTTTTT-ATGAAAAAGAAAAGAATTGTTATGAATCAATTCCAAGTTGAAGAAAGAATCGAATATTCATTGATCAAATCATTCACTCCATAGTCTGATCGATCTTTTCTTTTGAAGAACTGATTAATCGGACAAGAATAAAGATAGAGTCCCATTCTACATGTCAATATCAATACCGGCAACAATGAAATTTAGAGTAAGAGGAAAATCCGTCGACTTTAGAAATCGTGAGGGTTCAAG
>JX13
AGTGATAA--CTTT-CAAA--TTCAGA-GAAACCCTGGAATC--AAAAATGGGCAATCCT-GAGCCAAATCCT-GTTTTACAAGAACAAACAAGGGTTCAGAAAGCGAAAAAAAAA-GAAGGGGATAGGTGCAGAGACTCAACGGAAGCTGTTCTAAGAAATGGGGTTGACTGCCTTTTTTGGTAAAGAAAGGAAAAGAAATCCT----------ATCGAAACTCCATAAAGGATGAAGGATAAGCGTATATACACTATGTATACACAATGAAAAACTATCTCAAAAATGACAACCGAATCCGTATTTTTTTT-ATGAAAAAGAAAAGAATTGTTATGAATCAATTCCAAGTTGAAGAAAGAATCGAATATTCATTGATCAAATCATTCACTCCATAGTCTGATCGATCTTTTCTTTTGAAGAACTGATTAATCGGACAAGAATAAAGATAGAGTCCCATTCTACATGTCAATATCAATACCGGCAACAATGAAATTTAGAGTAAGAGGAAAATCCGTCGACTTTAGAAATCGTGAGGGTTCAAG
>JX14
AGTGATAA--CTTT-CAAA--TTCAGA-GAAACCCTGGAATC--AAAAATGGGCAATCCT-GAGCCAAATCCT-GTTTTACAAGAACAAACAAGGGTTCAGAAAGCGAAAAAAAAA-GAAGGGGATAGGTGCAGAGACTCAACGGAAGCTGTTCTAAGAAATGGGGTTGACTGCCTTTTTTGGTAAAGAAAGGAAAAGAAATCCT----------ATCGAAACTCCATAAAGGATGAAGGATAAGCGTATATACACTATGTATACACAATGAAAAACTATCTCAAAAATGACAACCGAATCCGTATTTTTTTT-ATGAAAAAGAAAAGAATTGTTATGAATCAATTCCAAGTTGAAGAAAGAATCGAATATTCATTGATCAAATCATTCACTCCATAGTCTGATCGATCTTTTCTTTTGAAGAACTGATTAATCGGACAAGAATAAAGATAGAGTCCCATTCTACATGTCAATATCAATACCGGCAACAATGAAATTTAGAGTAAGAGGAAAATCCGTCGACTTTAGAAATCGTGAGGGTTCAAG
>HS01
AGTGATAA--CTTT-CAAA--TTCAGA-GAAACCCTGGAATC--AAAAATGGGCAATCCT-GAGCCAAATCCT-GTTTTACAAGAACAAACAAGGGTTCAGAAAGCGAAAAAAAAA-GAAGGGGATAGGTGCAGAGACTCAACGGAAGCTGTTCTAAGAAATGGGGTTGACTGCCTTTTTTGGTAAAGAAAGGAAAAGAAATCCT----------ATCGAAACTCCATAAAGGATGAAGGATAAGCGTATATACACTATGTATACACAATGAAAAACTATCTCAAAAATGACAACCGAATCCGTATTTTTTTT-ATGAAAAAGAAAAGAATTGTTATGAATCAATTCCAAGTTGAAGAAAGAATCGAATATTCATTGATCAAATCATTCACTCCATAGTCTGATCGATCTTTTCTTTTGAAGAACTGATTAATCGGACAAGAATAAAGATAGAGTCCCATTCTACATGTCAATATCAATACCGGCAACAATGAAATTTAGAGTAAGAGGAAAATCCGTCGACTTTAGAAATCGTGAGGGTTCAAG
>HS02
AGTGATAA--CTTT-CAAA--TTCAGA-GAAACCCTGGAATC--AAAAATGGGCAATCCT-GAGCCAAATCCT-GTTTTACAAGAACAAACAAGGGTTCAGAAAGCGAAAAAAAAA-GAAGGGGATAGGTGCAGAGACTCAACGGAAGCTGTTCTAAGAAATGGGGTTGACTGCCTTTTTTGGTAAAGAAAGGAAAAGAAATCCT----------ATCGAAACTCCATAAAGGATGAAGGATAAGCGTATATACACTATGTATACACAATGAAAAACTATCTCAAAAATGACAACCGAATCCGTATTTTTTTT-ATGAAAAAGAAAAGAATTGTTATGAATCAATTCCAAGTTGAAGAAAGAATCGAATATTCATTGATCAAATCATTCACTCCATAGTCTGATCGATCTTTTCTTTTGAAGAACTGATTAATCGGACAAGAATAAAGATAGAGTCCCATTCTACATGTCAATATCAATACCGGCAACAATGAAATTTAGAGTAAGAGGAAAATCCGTCGACTTTAGAAATCGTGAGGGTTCAAG
>HS03
AGTGATAA--CTTT-CAAA--TTCAGA-GAAACCCTGGAATC--AAAAATGGGCAATCCT-GAGCCAAATCCT-GTTTTACAAGAACAAACAAGGGTTCAGAAAGCGAAAAAAAAA-GAAGGGGATAGGTGCAGAGACTCAACGGAAGCTGTTCTAAGAAATGGGGTTGACTGCCTTTTTTGGTAAAGAAAGGAAAAGAAATCCT----------ATCGAAACTCCATAAAGGATGAAGGATAAGCGTATATACACTATGTATACACAATGAAAAACTATCTCAAAAATGACAACCGAATCCGTATTTTTTTT-ATGAAAAAGAAAAGAATTGTTATGAATCAATTCCAAGTTGAAGAAAGAATCGAATATTCATTGATCAAATCATTCACTCCATAGTCTGATCGATCTTTTCTTTTGAAGAACTGATTAATCGGACAAGAATAAAGATAGAGTCCCATTCTACATGTCAATATCAATACCGGCAACAATGAAATTTAGAGTAAGAGGAAAATCCGTCGACTTTAGAAATCGTGAGGGTTCAAG
>HS04
AGTGATAA--CTTT-CAAA--TTCAGA-GAAACCCTGGAATC--AAAAATGGGCAATCCT-GAGCCAAATCCT-GTTTTACAAGAACAAACAAGGGTTCAGAAAGCGAAAAAAAAA-GAAGGGGATAGGTGCAGAGACTCAACGGAAGCTGTTCTAAGAAATGGGGTTGACTGCCTTTTTTGGTAAAGAAAGGAAAAGAAATCCT----------ATCGAAACTCCATAAAGGATGAAGGATAAGCGTATATACACTATGTATACACAATGAAAAACTATCTCAAAAATGACAACCGAATCCGTATTTTTTTT-ATGAAAAAGAAAAGAATTGTTATGAATCAATTCCAAGTTGAAGAAAGAATCGAATATTCATTGATCAAATCATTCACTCCATAGTCTGATCGATCTTTTCTTTTGAAGAACTGATTAATCGGACAAGAATAAAGATAGAGTCCCATTCTACATGTCAATATCAATACCGGCAACAATGAAATTTAGAGTAAGAGGAAAATCCGTCGACTTTAGAAATCGTGAGGGTTCAAG
>HS06
AGTGATAA--CTTT-CAAA--TTCAGA-GAAACCCTGGAATC--AAAAATGGGCAATCCT-GAGCCAAATCCT-GTTTTACAAGAACAAACAAGGGTTCAGAAAGCGAAAAAAAAA-GAAGGGGATAGGTGCAGAGACTCAACGGAAGCTGTTCTAAGAAATGGGGTTGACTGCCTTTTTTGGTAAAGAAAGGAAAAGAAATCCT----------ATCGAAACTCCATAAAGGATGAAGGATAAGCGTATATACACTATGTATACACAATGAAAAACTATCTCAAAAATGACAACCGAATCCGTATTTTTTTT-ATGAAAAAGAAAAGAATTGTTATGAATCAATTCCAAGTTGAAGAAAGAATCGAATATTCATTGATCAAATCATTCACTCCATAGTCTGATCGATCTTTTCTTTTGAAGAACTGATTAATCGGACAAGAATAAAGATAGAGTCCCATTCTACATGTCAATATCAATACCGGCAACAATGAAATTTAGAGTAAGAGGAAAATCCGTCGACTTTAGAAATCGTGAGGGTTCAAG
>WY02
AGTGATAA--CTTT-CAAA--TTCAGA-GAAACCCTGGAATC--AAAAATGGGCAATCCT-GAGCCAAATCCT-GTTTTACAAGAACAAACAAGGGTTCAGAAAGCGAAAAAAAAA-GAAGGGGATAGGTGCAGAGACTCAACGGAAGCTGTTCTAAGAAATGGGGTTGACTGCCTTTTTTGGTAAAGAAAGGAAAAGAAATCCT----------ATCGAAACTCCATAAAGGATGAAGGATAAGCGTATATACACTATGTATACACAATGAAAAACTATCTCAAAAATGACAACCGAATCCGTATTTTTTTT-ATGAAAAAGAAAAGAATTGTTATGAATCAATTCCAAGTTGAAGAAAGAATCGAATATTCATTGATCAAATCATTCACTCCATAGTCTGATCGATCTTTTCTTTTGAAGAACTGATTAATCGGACAAGAATAAAGATAGAGTCCCATTCTACATGTCAATATCAATACCGGCAACAATGAAATTTAGAGTAAGAGGAAAATCCGTCGACTTTAGAAATCGTGAGGGTTCAAG
>WY03
AGTGATAA--CTTT-CAAA--TTCAGA-GAAACCCTGGAATC--AAAAATGGGCAATCCT-GAGCCAAATCCT-GTTTTACAAGAACAAACAAGGGTTCAGAAAGCGAAAAAAAAA-GAAGGGGATAGGTGCAGAGACTCAACGGAAGCTGTTCTAAGAAATGGGGTTGACTGCCTTTTTTGGTAAAGAAAGGAAAAGAAATCCT----------ATCGAAACTCCATAAAGGATGAAGGATAAGCGTATATACACTATGTATACACAATGAAAAACTATCTCAAAAATGACAACCGAATCCGTATTTTTTTT-ATGAAAAAGAAAAGAATTGTTATGAATCAATTCCAAGTTGAAGAAAGAATCGAATATTCATTGATCAAATCATTCACTCCATAGTCTGATCGATCTTTTCTTTTGAAGAACTGATTAATCGGACAAGAATAAAGATAGAGTCCCATTCTACATGTCAATATCAATACCGGCAACAATGAAATTTAGAGTAAGAGGAAAATCCGTCGACTTTAGAAATCGTGAGGGTTCAAG
>WY04
AGTGATAA--CTTT-CAAA--TTCAGA-GAAACCCTGGAATC--AAAAATGGGCAATCCT-GAGCCAAATCCT-GTTTTACAAGAACAAACAAGGGTTCAGAAAGCGAAAAAAAAA-GAAGGGGATAGGTGCAGAGACTCAACGGAAGCTGTTCTAAGAAATGGGGTTGACTGCCTTTTTTGGTAAAGAAAGGAAAAGAAATCCT----------ATCGAAACTCCATAAAGGATGAAGGATAAGCGTATATACACTATGTATACACAATGAAAAACTATCTCAAAAATGACAACCGAATCCGTATTTTTTTT-ATGAAAAAGAAAAGAATTGTTATGAATCAATTCCAAGTTGAAGAAAGAATCGAATATTCATTGATCAAATCATTCACTCCATAGTCTGATCGATCTTTTCTTTTGAAGAACTGATTAATCGGACAAGAATAAAGATAGAGTCCCATTCTACATGTCAATATCAATACCGGCAACAATGAAATTTAGAGTAAGAGGAAAATCCGTCGACTTTAGAAATCGTGAGGGTTCAAG
>WY05
AGTGATAA--CTTT-CAAA--TTCAGA-GAAACCCTGGAATC--AAAAATGGGCAATCCT-GAGCCAAATCCT-GTTTTACAAGAACAAACAAGGGTTCAGAAAGCGAAAAAAAAA-GAAGGGGATAGGTGCAGAGACTCAACGGAAGCTGTTCTAAGAAATGGGGTTGACTGCCTTTTTTGGTAAAGAAAGGAAAAGAAATCCT----------ATCGAAACTCCATAAAGGATGAAGGATAAGCGTATATACACTATGTATACACAATGAAAAACTATCTCAAAAATGACAACCGAATCCGTATTTTTTTT-ATGAAAAAGAAAAGAATTGTTATGAATCAATTCCAAGTTGAAGAAAGAATCGAATATTCATTGATCAAATCATTCACTCCATAGTCTGATCGATCTTTTCTTTTGAAGAACTGATTAATCGGACAAGAATAAAGATAGAGTCCCATTCTACATGTCAATATCAATACCGGCAACAATGAAATTTAGAGTAAGAGGAAAATCCGTCGACTTTAGAAATCGTGAGGGTTCAAG
>WY06
AGTGATAA--CTTT-CAAA--TTCAGA-GAAACCCTGGAATC--AAAAATGGGCAATCCT-GAGCCAAATCCT-GTTTTACAAGAACAAACAAGGGTTCAGAAAGCGAAAAAAAAA-GAAGGGGATAGGTGCAGAGACTCAACGGAAGCTGTTCTAAGAAATGGGGTTGACTGCCTTTTTTGGTAAAGAAAGGAAAAGAAATCCT----------ATCGAAACTCCATAAAGGATGAAGGATAAGCGTATATACACTATGTATACACAATGAAAAACTATCTCAAAAATGACAACCGAATCCGTATTTTTTTT-ATGAAAAAGAAAAGAATTGTTATGAATCAATTCCAAGTTGAAGAAAGAATCGAATATTCATTGATCAAATCATTCACTCCATAGTCTGATCGATCTTTTCTTTTGAAGAACTGATTAATCGGACAAGAATAAAGATAGAGTCCCATTCTACATGTCAATATCAATACCGGCAACAATGAAATTTAGAGTAAGAGGAAAATCCGTCGACTTTAGAAATCGTGAGGGTTCAAG
>WY07
AGTGATAA--CTTT-CAAA--TTCAGA-GAAACCCTGGAATC--AAAAATGGGCAATCCT-GAGCCAAATCCT-GTTTTACAAGAACAAACAAGGGTTCAGAAAGCGAAAAAAAAA-GAAGGGGATAGGTGCAGAGACTCAACGGAAGCTGTTCTAAGAAATGGGGTTGACTGCCTTTTTTGGTAAAGAAAGGAAAAGAAATCCT----------ATCGAAACTCCATAAAGGATGAAGGATAAGCGTATATACACTATGTATACACAATGAAAAACTATCTCAAAAATGACAACCGAATCCGTATTTTTTTT-ATGAAAAAGAAAAGAATTGTTATGAATCAATTCCAAGTTGAAGAAAGAATCGAATATTCATTGATCAAATCATTCACTCCATAGTCTGATCGATCTTTTCTTTTGAAGAACTGATTAATCGGACAAGAATAAAGATAGAGTCCCATTCTACATGTCAATATCAATACCGGCAACAATGAAATTTAGAGTAAGAGGAAAATCCGTCGACTTTAGAAATCGTGAGGGTTCAAG
>XE01
AGTGATAA--CTTT-CAAA--TTCAGA-GAAACCCTGGAATC--AAAAATGGGCAATCCT-GAGCCAAATCCT-GTTTTACAAGAACAAACAAGGGTTCAGAAAGCGAAAAAAAAA-GAAGGGGATAGGTGCAGAGACTCAACGGAAGCTGTTCTAAGAAATGGGGTTGACTGCCTTTTTTGGTAAAGAAAGGAAAAGAAATCCT----------ATCGAAACTCCATAAAGGATGAAGGATAAGCGTATATACACTATGTATACACAATGAAAAACTATCTCAAAAATGACAACCGAATCCGTATTTTTTTT-ATGAAAAAGAAAAGAATTGTTATGAATCAATTCCAAGTTGAAGAAAGAATCGAATATTCATTGATCAAATCATTCACTCCATAGTCTGATCGATCTTTTCTTTTGAAGAACTGATTAATCGGACAAGAATAAAGATAGAGTCCCATTCTACATGTCAATATCAATACCGGCAACAATGAAATTTAGAGTAAGAGGAAAATCCGTCGACTTTAGAAATCGTGAGGGTTCAAG
>XE02
AGTGATAA--CTTT-CAAA--TTCAGA-GAAACCCTGGAATC--AAAAATGGGCAATCCT-GAGCCAAATCCT-GTTTTACAAGAACAAACAAGGGTTCAGAAAGCGAAAAAAAAA-GAAGGGGATAGGTGCAGAGACTCAACGGAAGCTGTTCTAAGAAATGGGGTTGACTGCCTTTTTTGGTAAAGAAAGGAAAAGAAATCCT----------ATCGAAACTCCATAAAGGATGAAGGATAAGCGTATATACACTATGTATACACAATGAAAAACTATCTCAAAAATGACAACCGAATCCGTATTTTTTTT-ATGAAAAAGAAAAGAATTGTTATGAATCAATTCCAAGTTGAAGAAAGAATCGAATATTCATTGATCAAATCATTCACTCCATAGTCTGATCGATCTTTTCTTTTGAAGAACTGATTAATCGGACAAGAATAAAGATAGAGTCCCATTCTACATGTCAATATCAATACCGGCAACAATGAAATTTAGAGTAAGAGGAAAATCCGTCGACTTTAGAAATCGTGAGGGTTCAAG
>XE03
AGTGATAA--CTTT-CAAA--TTCAGA-GAAACCCTGGAATC--AAAAATGGGCAATCCT-GAGCCAAATCCT-GTTTTACAAGAACAAACAAGGGTTCAGAAAGCGAAAAAAAAA-GAAGGGGATAGGTGCAGAGACTCAACGGAAGCTGTTCTAAGAAATGGGGTTGACTGCCTTTTTTGGTAAAGAAAGGAAAAGAAATCCT----------ATCGAAACTCCATAAAGGATGAAGGATAAGCGTATATACACTATGTATACACAATGAAAAACTATCTCAAAAATGACAACCGAATCCGTATTTTTTTT-ATGAAAAAGAAAAGAATTGTTATGAATCAATTCCAAGTTGAAGAAAGAATCGAATATTCATTGATCAAATCATTCACTCCATAGTCTGATCGATCTTTTCTTTTGAAGAACTGATTAATCGGACAAGAATAAAGATAGAGTCCCATTCTACATGTCAATATCAATACCGGCAACAATGAAATTTAGAGTAAGAGGAAAATCCGTCGACTTTAGAAATCGTGAGGGTTCAAG
>XE04
AGTGATAA--CTTT-CAAA--TTCAGA-GAAACCCTGGAATC--AAAAATGGGCAATCCT-GAGCCAAATCCT-GTTTTACAAGAACAAACAAGGGTTCAGAAAGCGAAAAAAAAA-GAAGGGGATAGGTGCAGAGACTCAACGGAAGCTGTTCTAAGAAATGGGGTTGACTGCCTTTTTTGGTAAAGAAAGGAAAAGAAATCCT----------ATCGAAACTCCATAAAGGATGAAGGATAAGCGTATATACACTATGTATACACAATGAAAAACTATCTCAAAAATGACAACCGAATCCGTATTTTTTTT-ATGAAAAAGAAAAGAATTGTTATGAATCAATTCCAAGTTGAAGAAAGAATCGAATATTCATTGATCAAATCATTCACTCCATAGTCTGATCGATCTTTTCTTTTGAAGAACTGATTAATCGGACAAGAATAAAGATAGAGTCCCATTCTACATGTCAATATCAATACCGGCAACAATGAAATTTAGAGTAAGAGGAAAATCCGTCGACTTTAGAAATCGTGAGGGTTCAAG
>XE08
AGTGATAA--CTTT-CAAA--TTCAGA-GAAACCCTGGAATC--AAAAATGGGCAATCCT-GAGCCAAATCCT-GTTTTACAAGAACAAACAAGGGTTCAGAAAGCGAAAAAAAAA-GAAGGGGATAGGTGCAGAGACTCAACGGAAGCTGTTCTAAGAAATGGGGTTGACTGCCTTTTTTGGTAAAGAAAGGAAAAGAAATCCT----------ATCGAAACTCCATAAAGGATGAAGGATAAGCGTATATACACTATGTATACACAATGAAAAACTATCTCAAAAATGACAACCGAATCCGTATTTTTTTT-ATGAAAAAGAAAAGAATTGTTATGAATCAATTCCAAGTTGAAGAAAGAATCGAATATTCATTGATCAAATCATTCACTCCATAGTCTGATCGATCTTTTCTTTTGAAGAACTGATTAATCGGACAAGAATAAAGATAGAGTCCCATTCTACATGTCAATATCAATACCGGCAACAATGAAATTTAGAGTAAGAGGAAAATCCGTCGACTTTAGAAATCGTGAGGGTTCAAG
>XE09
AGTGATAA--CTTT-CAAA--TTCAGA-GAAACCCTGGAATC--AAAAATGGGCAATCCT-GAGCCAAATCCT-GTTTTACAAGAACAAACAAGGGTTCAGAAAGCGAAAAAAAAA-GAAGGGGATAGGTGCAGAGACTCAACGGAAGCTGTTCTAAGAAATGGGGTTGACTGCCTTTTTTGGTAAAGAAAGGAAAAGAAATCCT----------ATCGAAACTCCATAAAGGATGAAGGATAAGCGTATATACACTATGTATACACAATGAAAAACTATCTCAAAAATGACAACCGAATCCGTATTTTTTTT-ATGAAAAAGAAAAGAATTGTTATGAATCAATTCCAAGTTGAAGAAAGAATCGAATATTCATTGATCAAATCATTCACTCCATAGTCTGATCGATCTTTTCTTTTGAAGAACTGATTAATCGGACAAGAATAAAGATAGAGTCCCATTCTACATGTCAATATCAATACCGGCAACAATGAAATTTAGAGTAAGAGGAAAATCCGTCGACTTTAGAAATCGTGAGGGTTCAAG
>GS09
AGTGATAA--CTTT-CAAA--TTCAGA-GAAACCCTGGAATC--AAAAATGGGCAATCCT-GAGCCAAATCCT-GTTTTACAAGAACAAACAAGGGTTCAGAAAGCGAAAAAAAAA-GAAGGGGATAGGTGCAGAGACTCAACGGAAGCTGTTCTAAGAAATGGGGTTGACTGCCTTTTTTGGTAAAGAAAGGAAAAGAAATCCT----------ATCGAAACTCCATAAAGGATGAAGGATAAGCGTATATACACTATGTATACACAATGAAAAACTATCTCAAAAATGACAACCGAATCCGTATTTTTTTT-ATGAAAAAGAAAAGAATTGTTATGAATCAATTCCAAGTTGAAGAAAGAATCGAATATTCATTGATCAAATCATTCACTCCATAGTCTGATCGATCTTTTCTTTTGAAGAACTGATTAATCGGACAAGAATAAAGATAGAGTCCCATTCTACATGTCAATATCAATACCGGCAACAATGAAATTTAGAGTAAGAGGAAAATCCGTCGACTTTAGAAATCGTGAGGGTTCAAG
>GS10
AGTGATAA--CTTT-CAAA--TTCAGA-GAAACCCTGGAATC--AAAAATGGGCAATCCT-GAGCCAAATCCT-GTTTTACAAGAACAAACAAGGGTTCAGAAAGCGAAAAAAAAA-GAAGGGGATAGGTGCAGAGACTCAACGGAAGCTGTTCTAAGAAATGGGGTTGACTGCCTTTTTTGGTAAAGAAAGGAAAAGAAATCCT----------ATCGAAACTCCATAAAGGATGAAGGATAAGCGTATATACACTATGTATACACAATGAAAAACTATCTCAAAAATGACAACCGAATCCGTATTTTTTTT-ATGAAAAAGAAAAGAATTGTTATGAATCAATTCCAAGTTGAAGAAAGAATCGAATATTCATTGATCAAATCATTCACTCCATAGTCTGATCGATCTTTTCTTTTGAAGAACTGATTAATCGGACAAGAATAAAGATAGAGTCCCATTCTACATGTCAATATCAATACCGGCAACAATGAAATTTAGAGTAAGAGGAAAATCCGTCGACTTTAGAAATCGTGAGGGTTCAAG
>MT01
AGTGATAA--CTTT-CAAA--TTCAGA-GAAACCCTGGAATC--AAAAATGGGCAATCCT-GAGCCAAATCCT-GTTTTACAAGAACAAACAAGGGTTCAGAAAGCGAAAAAAAAA-GAAGGGGATAGGTGCAGAGACTCAACGGAAGCTGTTCTAAGAAATGGGGTTGACTGCCTTTTTTGGTAAAGAAAGGAAAAGAAATCCT----------ATCGAAACTCCATAAAGGATGAAGGATAAGCGTATATACACTATGTATACACAATGAAAAACTATCTCAAAAATGACAACCGAATCCGTATTTTTTTT-ATGAAAAAGAAAAGAATTGTTATGAATCAATTCCAAGTTGAAGAAAGAATCGAATATTCATTGATCAAATCATTCACTCCATAGTCTGATCGATCTTTTCTTTTGAAGAACTGATTAATCGGACAAGAATAAAGATAGAGTCCCATTCTACATGTCAATATCAATACCGGCAACAATGAAATTTAGAGTAAGAGGAAAATCCGTCGACTTTAGAAATCGTGAGGGTTCAAG
>MT02
AGTGATAA--CTTT-CAAA--TTCAGA-GAAACCCTGGAATC--AAAAATGGGCAATCCT-GAGCCAAATCCT-GTTTTACAAGAACAAACAAGGGTTCAGAAAGCGAAAAAAAAA-GAAGGGGATAGGTGCAGAGACTCAACGGAAGCTGTTCTAAGAAATGGGGTTGACTGCCTTTTTTGGTAAAGAAAGGAAAAGAAATCCT----------ATCGAAACTCCATAAAGGATGAAGGATAAGCGTATATACACTATGTATACACAATGAAAAACTATCTCAAAAATGACAACCGAATCCGTATTTTTTTT-ATGAAAAAGAAAAGAATTGTTATGAATCAATTCCAAGTTGAAGAAAGAATCGAATATTCATTGATCAAATCATTCACTCCATAGTCTGATCGATCTTTTCTTTTGAAGAACTGATTAATCGGACAAGAATAAAGATAGAGTCCCATTCTACATGTCAATATCAATACCGGCAACAATGAAATTTAGAGTAAGAGGAAAATCCGTCGACTTTAGAAATCGTGAGGGTTCAAG
>MT03
AGTGATAA--CTTT-CAAA--TTCAGA-GAAACCCTGGAATC--AAAAATGGGCAATCCT-GAGCCAAATCCT-GTTTTACAAGAACAAACAAGGGTTCAGAAAGCGAAAAAAAAA-GAAGGGGATAGGTGCAGAGACTCAACGGAAGCTGTTCTAAGAAATGGGGTTGACTGCCTTTTTTGGTAAAGAAAGGAAAAGAAATCCT----------ATCGAAACTCCATAAAGGATGAAGGATAAGCGTATATACACTATGTATACACAATGAAAAACTATCTCAAAAATGACAACCGAATCCGTATTTTTTTT-ATGAAAAAGAAAAGAATTGTTATGAATCAATTCCAAGTTGAAGAAAGAATCGAATATTCATTGATCAAATCATTCACTCCATAGTCTGATCGATCTTTTCTTTTGAAGAACTGATTAATCGGACAAGAATAAAGATAGAGTCCCATTCTACATGTCAATATCAATACCGGCAACAATGAAATTTAGAGTAAGAGGAAAATCCGTCGACTTTAGAAATCGTGAGGGTTCAAG
>MT04
AGTGATAA--CTTT-CAAA--TTCAGA-GAAACCCTGGAATC--AAAAATGGGCAATCCT-GAGCCAAATCCT-GTTTTACAAGAACAAACAAGGGTTCAGAAAGCGAAAAAAAAA-GAAGGGGATAGGTGCAGAGACTCAACGGAAGCTGTTCTAAGAAATGGGGTTGACTGCCTTTTTTGGTAAAGAAAGGAAAAGAAATCCT----------ATCGAAACTCCATAAAGGATGAAGGATAAGCGTATATACACTATGTATACACAATGAAAAACTATCTCAAAAATGACAACCGAATCCGTATTTTTTTT-ATGAAAAAGAAAAGAATTGTTATGAATCAATTCCAAGTTGAAGAAAGAATCGAATATTCATTGATCAAATCATTCACTCCATAGTCTGATCGATCTTTTCTTTTGAAGAACTGATTAATCGGACAAGAATAAAGATAGAGTCCCATTCTACATGTCAATATCAATACCGGCAACAATGAAATTTAGAGTAAGAGGAAAATCCGTCGACTTTAGAAATCGTGAGGGTTCAAG
>MT05
AGTGATAA--CTTT-CAAA--TTCAGA-GAAACCCTGGAATC--AAAAATGGGCAATCCT-GAGCCAAATCCT-GTTTTACAAGAACAAACAAGGGTTCAGAAAGCGAAAAAAAAA-GAAGGGGATAGGTGCAGAGACTCAACGGAAGCTGTTCTAAGAAATGGGGTTGACTGCCTTTTTTGGTAAAGAAAGGAAAAGAAATCCT----------ATCGAAACTCCATAAAGGATGAAGGATAAGCGTATATACACTATGTATACACAATGAAAAACTATCTCAAAAATGACAACCGAATCCGTATTTTTTTT-ATGAAAAAGAAAAGAATTGTTATGAATCAATTCCAAGTTGAAGAAAGAATCGAATATTCATTGATCAAATCATTCACTCCATAGTCTGATCGATCTTTTCTTTTGAAGAACTGATTAATCGGACAAGAATAAAGATAGAGTCCCATTCTACATGTCAATATCAATACCGGCAACAATGAAATTTAGAGTAAGAGGAAAATCCGTCGACTTTAGAAATCGTGAGGGTTCAAG
>MT06
AGTGATAA--CTTT-CAAA--TTCAGA-GAAACCCTGGAATC--AAAAATGGGCAATCCT-GAGCCAAATCCT-GTTTTACAAGAACAAACAAGGGTTCAGAAAGCGAAAAAAAAA-GAAGGGGATAGGTGCAGAGACTCAACGGAAGCTGTTCTAAGAAATGGGGTTGACTGCCTTTTTTGGTAAAGAAAGGAAAAGAAATCCT----------ATCGAAACTCCATAAAGGATGAAGGATAAGCGTATATACACTATGTATACACAATGAAAAACTATCTCAAAAATGACAACCGAATCCGTATTTTTTTT-ATGAAAAAGAAAAGAATTGTTATGAATCAATTCCAAGTTGAAGAAAGAATCGAATATTCATTGATCAAATCATTCACTCCATAGTCTGATCGATCTTTTCTTTTGAAGAACTGATTAATCGGACAAGAATAAAGATAGAGTCCCATTCTACATGTCAATATCAATACCGGCAACAATGAAATTTAGAGTAAGAGGAAAATCCGTCGACTTTAGAAATCGTGAGGGTTCAAG
>MT07
AGTGATAA--CTTT-CAAA--TTCAGA-GAAACCCTGGAATC--AAAAATGGGCAATCCT-GAGCCAAATCCT-GTTTTACAAGAACAAACAAGGGTTCAGAAAGCGAAAAAAAAA-GAAGGGGATAGGTGCAGAGACTCAACGGAAGCTGTTCTAAGAAATGGGGTTGACTGCCTTTTTTGGTAAAGAAAGGAAAAGAAATCCT----------ATCGAAACTCCATAAAGGATGAAGGATAAGCGTATATACACTATGTATACACAATGAAAAACTATCTCAAAAATGACAACCGAATCCGTATTTTTTTT-ATGAAAAAGAAAAGAATTGTTATGAATCAATTCCAAGTTGAAGAAAGAATCGAATATTCATTGATCAAATCATTCACTCCATAGTCTGATCGATCTTTTCTTTTGAAGAACTGATTAATCGGACAAGAATAAAGATAGAGTCCCATTCTACATGTCAATATCAATACCGGCAACAATGAAATTTAGAGTAAGAGGAAAATCCGTCGACTTTAGAAATCGTGAGGGTTCAAG
>MT08
AGTGATAA--CTTT-CAAA--TTCAGA-GAAACCCTGGAATC--AAAAATGGGCAATCCT-GAGCCAAATCCT-GTTTTACAAGAACAAACAAGGGTTCAGAAAGCGAAAAAAAAA-GAAGGGGATAGGTGCAGAGACTCAACGGAAGCTGTTCTAAGAAATGGGGTTGACTGCCTTTTTTGGTAAAGAAAGGAAAAGAAATCCT----------ATCGAAACTCCATAAAGGATGAAGGATAAGCGTATATACACTATGTATACACAATGAAAAACTATCTCAAAAATGACAACCGAATCCGTATTTTTTTT-ATGAAAAAGAAAAGAATTGTTATGAATCAATTCCAAGTTGAAGAAAGAATCGAATATTCATTGATCAAATCATTCACTCCATAGTCTGATCGATCTTTTCTTTTGAAGAACTGATTAATCGGACAAGAATAAAGATAGAGTCCCATTCTACATGTCAATATCAATACCGGCAACAATGAAATTTAGAGTAAGAGGAAAATCCGTCGACTTTAGAAATCGTGAGGGTTCAAG
>MT09
AGTGATAA--CTTT-CAAA--TTCAGA-GAAACCCTGGAATC--AAAAATGGGCAATCCT-GAGCCAAATCCT-GTTTTACAAGAACAAACAAGGGTTCAGAAAGCGAAAAAAAAA-GAAGGGGATAGGTGCAGAGACTCAACGGAAGCTGTTCTAAGAAATGGGGTTGACTGCCTTTTTTGGTAAAGAAAGGAAAAGAAATCCT----------ATCGAAACTCCATAAAGGATGAAGGATAAGCGTATATACACTATGTATACACAATGAAAAACTATCTCAAAAATGACAACCGAATCCGTATTTTTTTT-ATGAAAAAGAAAAGAATTGTTATGAATCAATTCCAAGTTGAAGAAAGAATCGAATATTCATTGATCAAATCATTCACTCCATAGTCTGATCGATCTTTTCTTTTGAAGAACTGATTAATCGGACAAGAATAAAGATAGAGTCCCATTCTACATGTCAATATCAATACCGGCAACAATGAAATTTAGAGTAAGAGGAAAATCCGTCGACTTTAGAAATCGTGAGGGTTCAAG
>HP01
AGTGATAA--CTTT-CAAA--TTCAGA-GAAACCCTGGAATC--AAAAATGGGCAATCCT-GAGCCAAATCCT-GTTTTACAAGAACAAACAAGGGTTCAGAAAGCGAAAAAAAAA-GAAGGGGATAGGTGCAGAGACTCAACGGAAGCTGTTCTAAGAAATGGGGTTGACTGCCTTTTTTGGTAAAGAAAGGAAAAGAAATCCT----------ATCGAAACTCCATAAAGGATGAAGGATAAGCGTATATACACTATGTATACACAATGAAAAACTATCTCAAAAATGACAACCGAATCCGTATTTTTTTT-ATGAAAAAGAAAAGAATTGTTATGAATCAATTCCAAGTTGAAGAAAGAATCGAATATTCATTGATCAAATCATTCACTCCATAGTCTGATCGATCTTTTCTTTTGAAGAACTGATTAATCGGACAAGAATAAAGATAGAGTCCCATTCTACATGTCAATATCAATACCGGCAACAATGAAATTTAGAGTAAGAGGAAAATCCGTCGACTTTAGAAATCGTGAGGGTTCAAG
>HP02
AGTGATAA--CTTT-CAAA--TTCAGA-GAAACCCTGGAATC--AAAAATGGGCAATCCT-GAGCCAAATCCT-GTTTTACAAGAACAAACAAGGGTTCAGAAAGCGAAAAAAAAA-GAAGGGGATAGGTGCAGAGACTCAACGGAAGCTGTTCTAAGAAATGGGGTTGACTGCCTTTTTTGGTAAAGAAAGGAAAAGAAATCCT----------ATCGAAACTCCATAAAGGATGAAGGATAAGCGTATATACACTATGTATACACAATGAAAAACTATCTCAAAAATGACAACCGAATCCGTATTTTTTTT-ATGAAAAAGAAAAGAATTGTTATGAATCAATTCCAAGTTGAAGAAAGAATCGAATATTCATTGATCAAATCATTCACTCCATAGTCTGATCGATCTTTTCTTTTGAAGAACTGATTAATCGGACAAGAATAAAGATAGAGTCCCATTCTACATGTCAATATCAATACCGGCAACAATGAAATTTAGAGTAAGAGGAAAATCCGTCGACTTTAGAAATCGTGAGGGTTCAAG
>LC01
AGTGATAA--CTTT-CAAA--TTCAGA-GAAACCCTGGAATC--AAAAATGGGCAATCCT-GAGCCAAATCCT-GTTTTACAAGAACAAACAAGGGTTCAGAAAGCGAAAAAAAAA-GAAGGGGATAGGTGCAGAGACTCAACGGAAGCTGTTCTAAGAAATGGGGTTGACTGCCTTTTTTGGTAAAGAAAGGAAAAGAAATCCT----------ATCGAAACTCCATAAAGGATGAAGGATAAGCGTATATACACTATGTATACACAATGAAAAACTATCTCAAAAATGACAACCGAATCCGTATTTTTTTT-ATGAAAAAGAAAAGAATTGTTATGAATCAATTCCAAGTTGAAGAAAGAATCGAATATTCATTGATCAAATCATTCACTCCATAGTCTGATCGATCTTTTCTTTTGAAGAACTGATTAATCGGACAAGAATAAAGATAGAGTCCCATTCTACATGTCAATATCAATACCGGCAACAATGAAATTTAGAGTAAGAGGAAAATCCGTCGACTTTAGAAATCGTGAGGGTTCAAG
>LC02
AGTGATAA--CTTT-CAAA--TTCAGA-GAAACCCTGGAATC--AAAAATGGGCAATCCT-GAGCCAAATCCT-GTTTTACAAGAACAAACAAGGGTTCAGAAAGCGAAAAAAAAA-GAAGGGGATAGGTGCAGAGACTCAACGGAAGCTGTTCTAAGAAATGGGGTTGACTGCCTTTTTTGGTAAAGAAAGGAAAAGAAATCCT----------ATCGAAACTCCATAAAGGATGAAGGATAAGCGTATATACACTATGTATACACAATGAAAAACTATCTCAAAAATGACAACCGAATCCGTATTTTTTTT-ATGAAAAAGAAAAGAATTGTTATGAATCAATTCCAAGTTGAAGAAAGAATCGAATATTCATTGATCAAATCATTCACTCCATAGTCTGATCGATCTTTTCTTTTGAAGAACTGATTAATCGGACAAGAATAAAGATAGAGTCCCATTCTACATGTCAATATCAATACCGGCAACAATGAAATTTAGAGTAAGAGGAAAATCCGTCGACTTTAGAAATCGTGAGGGTTCAAG
>LC03
AGTGATAA--CTTT-CAAA--TTCAGA-GAAACCCTGGAATC--AAAAATGGGCAATCCT-GAGCCAAATCCT-GTTTTACAAGAACAAACAAGGGTTCAGAAAGCGAAAAAAAAA-GAAGGGGATAGGTGCAGAGACTCAACGGAAGCTGTTCTAAGAAATGGGGTTGACTGCCTTTTTTGGTAAAGAAAGGAAAAGAAATCCT----------ATCGAAACTCCATAAAGGATGAAGGATAAGCGTATATACACTATGTATACACAATGAAAAACTATCTCAAAAATGACAACCGAATCCGTATTTTTTTT-ATGAAAAAGAAAAGAATTGTTATGAATCAATTCCAAGTTGAAGAAAGAATCGAATATTCATTGATCAAATCATTCACTCCATAGTCTGATCGATCTTTTCTTTTGAAGAACTGATTAATCGGACAAGAATAAAGATAGAGTCCCATTCTACATGTCAATATCAATACCGGCAACAATGAAATTTAGAGTAAGAGGAAAATCCGTCGACTTTAGAAATCGTGAGGGTTCAAG
>LC04
AGTGATAA--CTTT-CAAA--TTCAGA-GAAACCCTGGAATC--AAAAATGGGCAATCCT-GAGCCAAATCCT-GTTTTACAAGAACAAACAAGGGTTCAGAAAGCGAAAAAAAAA-GAAGGGGATAGGTGCAGAGACTCAACGGAAGCTGTTCTAAGAAATGGGGTTGACTGCCTTTTTTGGTAAAGAAAGGAAAAGAAATCCT----------ATCGAAACTCCATAAAGGATGAAGGATAAGCGTATATACACTATGTATACACAATGAAAAACTATCTCAAAAATGACAACCGAATCCGTATTTTTTTT-ATGAAAAAGAAAAGAATTGTTATGAATCAATTCCAAGTTGAAGAAAGAATCGAATATTCATTGATCAAATCATTCACTCCATAGTCTGATCGATCTTTTCTTTTGAAGAACTGATTAATCGGACAAGAATAAAGATAGAGTCCCATTCTACATGTCAATATCAATACCGGCAACAATGAAATTTAGAGTAAGAGGAAAATCCGTCGACTTTAGAAATCGTGAGGGTTCAAG
>LC05
AGTGATAA--CTTT-CAAA--TTCAGA-GAAACCCTGGAATC--AAAAATGGGCAATCCT-GAGCCAAATCCT-GTTTTACAAGAACAAACAAGGGTTCAGAAAGCGAAAAAAAAA-GAAGGGGATAGGTGCAGAGACTCAACGGAAGCTGTTCTAAGAAATGGGGTTGACTGCCTTTTTTGGTAAAGAAAGGAAAAGAAATCCT----------ATCGAAACTCCATAAAGGATGAAGGATAAGCGTATATACACTATGTATACACAATGAAAAACTATCTCAAAAATGACAACCGAATCCGTATTTTTTTT-ATGAAAAAGAAAAGAATTGTTATGAATCAATTCCAAGTTGAAGAAAGAATCGAATATTCATTGATCAAATCATTCACTCCATAGTCTGATCGATCTTTTCTTTTGAAGAACTGATTAATCGGACAAGAATAAAGATAGAGTCCCATTCTACATGTCAATATCAATACCGGCAACAATGAAATTTAGAGTAAGAGGAAAATCCGTCGACTTTAGAAATCGTGAGGGTTCAAG
>LC06
AGTGATAA--CTTT-CAAA--TTCAGA-GAAACCCTGGAATC--AAAAATGGGCAATCCT-GAGCCAAATCCT-GTTTTACAAGAACAAACAAGGGTTCAGAAAGCGAAAAAAAAA-GAAGGGGATAGGTGCAGAGACTCAACGGAAGCTGTTCTAAGAAATGGGGTTGACTGCCTTTTTTGGTAAAGAAAGGAAAAGAAATCCT----------ATCGAAACTCCATAAAGGATGAAGGATAAGCGTATATACACTATGTATACACAATGAAAAACTATCTCAAAAATGACAACCGAATCCGTATTTTTTTT-ATGAAAAAGAAAAGAATTGTTATGAATCAATTCCAAGTTGAAGAAAGAATCGAATATTCATTGATCAAATCATTCACTCCATAGTCTGATCGATCTTTTCTTTTGAAGAACTGATTAATCGGACAAGAATAAAGATAGAGTCCCATTCTACATGTCAATATCAATACCGGCAACAATGAAATTTAGAGTAAGAGGAAAATCCGTCGACTTTAGAAATCGTGAGGGTTCAAG
>LC07
AGTGATAA--CTTT-CAAA--TTCAGA-GAAACCCTGGAATC--AAAAATGGGCAATCCT-GAGCCAAATCCT-GTTTTACAAGAACAAACAAGGGTTCAGAAAGCGAAAAAAAAA-GAAGGGGATAGGTGCAGAGACTCAACGGAAGCTGTTCTAAGAAATGGGGTTGACTGCCTTTTTTGGTAAAGAAAGGAAAAGAAATCCT----------ATCGAAACTCCATAAAGGATGAAGGATAAGCGTATATACACTATGTATACACAATGAAAAACTATCTCAAAAATGACAACCGAATCCGTATTTTTTTT-ATGAAAAAGAAAAGAATTGTTATGAATCAATTCCAAGTTGAAGAAAGAATCGAATATTCATTGATCAAATCATTCACTCCATAGTCTGATCGATCTTTTCTTTTGAAGAACTGATTAATCGGACAAGAATAAAGATAGAGTCCCATTCTACATGTCAATATCAATACCGGCAACAATGAAATTTAGAGTAAGAGGAAAATCCGTCGACTTTAGAAATCGTGAGGGTTCAAG
>LC08
AGTGATAA--CTTT-CAAA--TTCAGA-GAAACCCTGGAATC--AAAAATGGGCAATCCT-GAGCCAAATCCT-GTTTTACAAGAACAAACAAGGGTTCAGAAAGCGAAAAAAAAA-GAAGGGGATAGGTGCAGAGACTCAACGGAAGCTGTTCTAAGAAATGGGGTTGACTGCCTTTTTTGGTAAAGAAAGGAAAAGAAATCCT----------ATCGAAACTCCATAAAGGATGAAGGATAAGCGTATATACACTATGTATACACAATGAAAAACTATCTCAAAAATGACAACCGAATCCGTATTTTTTTT-ATGAAAAAGAAAAGAATTGTTATGAATCAATTCCAAGTTGAAGAAAGAATCGAATATTCATTGATCAAATCATTCACTCCATAGTCTGATCGATCTTTTCTTTTGAAGAACTGATTAATCGGACAAGAATAAAGATAGAGTCCCATTCTACATGTCAATATCAATACCGGCAACAATGAAATTTAGAGTAAGAGGAAAATCCGTCGACTTTAGAAATCGTGAGGGTTCAAG
>LC09
AGTGATAA--CTTT-CAAA--TTCAGA-GAAACCCTGGAATC--AAAAATGGGCAATCCT-GAGCCAAATCCT-GTTTTACAAGAACAAACAAGGGTTCAGAAAGCGAAAAAAAAA-GAAGGGGATAGGTGCAGAGACTCAACGGAAGCTGTTCTAAGAAATGGGGTTGACTGCCTTTTTTGGTAAAGAAAGGAAAAGAAATCCT----------ATCGAAACTCCATAAAGGATGAAGGATAAGCGTATATACACTATGTATACACAATGAAAAACTATCTCAAAAATGACAACCGAATCCGTATTTTTTTT-ATGAAAAAGAAAAGAATTGTTATGAATCAATTCCAAGTTGAAGAAAGAATCGAATATTCATTGATCAAATCATTCACTCCATAGTCTGATCGATCTTTTCTTTTGAAGAACTGATTAATCGGACAAGAATAAAGATAGAGTCCCATTCTACATGTCAATATCAATACCGGCAACAATGAAATTTAGAGTAAGAGGAAAATCCGTCGACTTTAGAAATCGTGAGGGTTCAAG
>LC10
AGTGATAA--CTTT-CAAA--TTCAGA-GAAACCCTGGAATC--AAAAATGGGCAATCCT-GAGCCAAATCCT-GTTTTACAAGAACAAACAAGGGTTCAGAAAGCGAAAAAAAAA-GAAGGGGATAGGTGCAGAGACTCAACGGAAGCTGTTCTAAGAAATGGGGTTGACTGCCTTTTTTGGTAAAGAAAGGAAAAGAAATCCT----------ATCGAAACTCCATAAAGGATGAAGGATAAGCGTATATACACTATGTATACACAATGAAAAACTATCTCAAAAATGACAACCGAATCCGTATTTTTTTT-ATGAAAAAGAAAAGAATTGTTATGAATCAATTCCAAGTTGAAGAAAGAATCGAATATTCATTGATCAAATCATTCACTCCATAGTCTGATCGATCTTTTCTTTTGAAGAACTGATTAATCGGACAAGAATAAAGATAGAGTCCCATTCTACATGTCAATATCAATACCGGCAACAATGAAATTTAGAGTAAGAGGAAAATCCGTCGACTTTAGAAATCGTGAGGGTTCAAG
>LC12
AGTGATAA--CTTT-CAAA--TTCAGA-GAAACCCTGGAATC--AAAAATGGGCAATCCT-GAGCCAAATCCT-GTTTTACAAGAACAAACAAGGGTTCAGAAAGCGAAAAAAAAA-GAAGGGGATAGGTGCAGAGACTCAACGGAAGCTGTTCTAAGAAATGGGGTTGACTGCCTTTTTTGGTAAAGAAAGGAAAAGAAATCCT----------ATCGAAACTCCATAAAGGATGAAGGATAAGCGTATATACACTATGTATACACAATGAAAAACTATCTCAAAAATGACAACCGAATCCGTATTTTTTTT-ATGAAAAAGAAAAGAATTGTTATGAATCAATTCCAAGTTGAAGAAAGAATCGAATATTCATTGATCAAATCATTCACTCCATAGTCTGATCGATCTTTTCTTTTGAAGAACTGATTAATCGGACAAGAATAAAGATAGAGTCCCATTCTACATGTCAATATCAATACCGGCAACAATGAAATTTAGAGTAAGAGGAAAATCCGTCGACTTTAGAAATCGTGAGGGTTCAAG
>LC13
AGTGATAA--CTTT-CAAA--TTCAGA-GAAACCCTGGAATC--AAAAATGGGCAATCCT-GAGCCAAATCCT-GTTTTACAAGAACAAACAAGGGTTCAGAAAGCGAAAAAAAAA-GAAGGGGATAGGTGCAGAGACTCAACGGAAGCTGTTCTAAGAAATGGGGTTGACTGCCTTTTTTGGTAAAGAAAGGAAAAGAAATCCT----------ATCGAAACTCCATAAAGGATGAAGGATAAGCGTATATACACTATGTATACACAATGAAAAACTATCTCAAAAATGACAACCGAATCCGTATTTTTTTT-ATGAAAAAGAAAAGAATTGTTATGAATCAATTCCAAGTTGAAGAAAGAATCGAATATTCATTGATCAAATCATTCACTCCATAGTCTGATCGATCTTTTCTTTTGAAGAACTGATTAATCGGACAAGAATAAAGATAGAGTCCCATTCTACATGTCAATATCAATACCGGCAACAATGAAATTTAGAGTAAGAGGAAAATCCGTCGACTTTAGAAATCGTGAGGGTTCAAG
>LC15
AGTGATAA--CTTT-CAAA--TTCAGA-GAAACCCTGGAATC--AAAAATGGGCAATCCT-GAGCCAAATCCT-GTTTTACAAGAACAAACAAGGGTTCAGAAAGCGAAAAAAAAA-GAAGGGGATAGGTGCAGAGACTCAACGGAAGCTGTTCTAAGAAATGGGGTTGACTGCCTTTTTTGGTAAAGAAAGGAAAAGAAATCCT----------ATCGAAACTCCATAAAGGATGAAGGATAAGCGTATATACACTATGTATACACAATGAAAAACTATCTCAAAAATGACAACCGAATCCGTATTTTTTTT-ATGAAAAAGAAAAGAATTGTTATGAATCAATTCCAAGTTGAAGAAAGAATCGAATATTCATTGATCAAATCATTCACTCCATAGTCTGATCGATCTTTTCTTTTGAAGAACTGATTAATCGGACAAGAATAAAGATAGAGTCCCATTCTACATGTCAATATCAATACCGGCAACAATGAAATTTAGAGTAAGAGGAAAATCCGTCGACTTTAGAAATCGTGAGGGTTCAAG

H2
>LL01
AGTGATAA--CTTT-CAAA--TTCAGA-GAAACCCTGGAATC--AAAAATGGGCAATCCT
-GAGCCAAATCCT-GTTTTACAAGAACAAACAAGGGTTCAGAAAGCGAAAAAAAAA-AAG
GGGGATAGGTGCAGAGACTCAACGGAAGCTGTTCTAAGAAATGGGGTTGACTGCCTTTTT
TGGTAAAGAAAGGAAAAGAAATCCTTCTATCGAATATCGAAACTCCATAAAGGATGAAGG
ATAAGCGTATATACACTATGTATACACAATGAAAAACTATCTCAAAAATGACAACCGAAT
CCGTATTTTTTTTTATGAAAAAAAAAAAAATTGTTATGAATCAATTCCAAGTTGAAAAAA
GAATCGAATATTCATTGATCAAATCATTCACTCCATAGTCTGATCGATCTTTTCTTTTGA
AAAACTGATTAATCGGACAAGAATAAAGATAGAGTCCCATTCTACATGTCAATATCAATA
CCGGCAACAATGAAATTTAGAGTAAGAGGAAAATCCGTCGACTTTAGAAATCGTGAGGGT
TCAAG
>LL04
AGTGATAA--CTTT-CAAA--TTCAGA-GAAACCCTGGAATC--AAAAATGGGCAATCCT
-GAGCCAAATCCT-GTTTTACAAGAACAAACAAGGGTTCAGAAAGCGAAAAAAAAA-AAG
GGGGATAGGTGCAGAGACTCAACGGAAGCTGTTCTAAGAAATGGGGTTGACTGCCTTTTT
TGGTAAAGAAAGGAAAAGAAATCCTTCTATCGAATATCGAAACTCCATAAAGGATGAAGG
ATAAGCGTATATACACTATGTATACACAATGAAAAACTATCTCAAAAATGACAACCGAAT
CCGTATTTTTTTTTATGAAAAAAAAAAAAATTGTTATGAATCAATTCCAAGTTGAAAAAA
GAATCGAATATTCATTGATCAAATCATTCACTCCATAGTCTGATCGATCTTTTCTTTTGA
AAAACTGATTAATCGGACAAGAATAAAGATAGAGTCCCATTCTACATGTCAATATCAATA
CCGGCAACAATGAAATTTAGAGTAAGAGGAAAATCCGTCGACTTTAGAAATCGTGAGGGT
TCAAG
>YR06
AGTGATAA--CTTT-CAAA--TTCAGA-GAAACCCTGGAATC--AAAAATGGGCAATCCT
-GAGCCAAATCCT-GTTTTACAAGAACAAACAAGGGTTCAGAAAGCGAAAAAAAAA-AAG
GGGGATAGGTGCAGAGACTCAACGGAAGCTGTTCTAAGAAATGGGGTTGACTGCCTTTTT
TGGTAAAGAAAGGAAAAGAAATCCTTCTATCGAATATCGAAACTCCATAAAGGATGAAGG
ATAAGCGTATATACACTATGTATACACAATGAAAAACTATCTCAAAAATGACAACCGAAT
CCGTATTTTTTTTTATGAAAAAAAAAAAAATTGTTATGAATCAATTCCAAGTTGAAAAAA
GAATCGAATATTCATTGATCAAATCATTCACTCCATAGTCTGATCGATCTTTTCTTTTGA
AAAACTGATTAATCGGACAAGAATAAAGATAGAGTCCCATTCTACATGTCAATATCAATA
CCGGCAACAATGAAATTTAGAGTAAGAGGAAAATCCGTCGACTTTAGAAATCGTGAGGGT
TCAAG

H3
>LL02
AGTGATAA--CTTT-CAAA--TTCAGA-GAAACCCTGGAATC--AAAAATGGGCAATCCT
-GAGCCAAATCCT-GTTTTACAAGAACAAACAAGGGTTCAGAAAGCGAAAAAAAAA-AAG
GGGGATAGGTGCAGAGACTCAACGGAAGCTGTTCTAAGAAATGGGGTTGACTGCCTTTTT
TGGTAAAGAAAGGAAAAGAAATCCTTCTATCGAATATCGAAACTCCATAAAGGATGAAGG
ATAAGCGTATATACACTATGTATACACAATGAAAAACTATCTCAAAAATGACAACCGAAT
CCGTATTTTTTTTTATGAAAAAAAAAAAAATTGTTATGAATCAATTCCAAGTTGAAAAAA
GAATCGAATATTCATTGATCAAATCATTCACTCCATAGTCTGATCGATCTTTTCTTTTGA
AAAACTGATTAATCGGACAAAAATAAAGATAGAGTCCCATTCTACATGTCAATATCAATA
CCGGCAACAATGAAATTTAGAGTAAGAGGAAAATCCGTCGACTTTAGAAATCGTGAGGGT
TCAAG
>LL05
AGTGATAA--CTTT-CAAA--TTCAGA-GAAACCCTGGAATC--AAAAATGGGCAATCCT
-GAGCCAAATCCT-GTTTTACAAGAACAAACAAGGGTTCAGAAAGCGAAAAAAAAA-AAG
GGGGATAGGTGCAGAGACTCAACGGAAGCTGTTCTAAGAAATGGGGTTGACTGCCTTTTT
TGGTAAAGAAAGGAAAAGAAATCCTTCTATCGAATATCGAAACTCCATAAAGGATGAAGG
ATAAGCGTATATACACTATGTATACACAATGAAAAACTATCTCAAAAATGACAACCGAAT
CCGTATTTTTTTTTATGAAAAAAAAAAAAATTGTTATGAATCAATTCCAAGTTGAAAAAA
GAATCGAATATTCATTGATCAAATCATTCACTCCATAGTCTGATCGATCTTTTCTTTTGA
AAAACTGATTAATCGGACAAAAATAAAGATAGAGTCCCATTCTACATGTCAATATCAATA
CCGGCAACAATGAAATTTAGAGTAAGAGGAAAATCCGTCGACTTTAGAAATCGTGAGGGT
TCAAG
>LL06
AGTGATAA--CTTT-CAAA--TTCAGA-GAAACCCTGGAATC--AAAAATGGGCAATCCT
-GAGCCAAATCCT-GTTTTACAAGAACAAACAAGGGTTCAGAAAGCGAAAAAAAAA-AAG
GGGGATAGGTGCAGAGACTCAACGGAAGCTGTTCTAAGAAATGGGGTTGACTGCCTTTTT
TGGTAAAGAAAGGAAAAGAAATCCTTCTATCGAATATCGAAACTCCATAAAGGATGAAGG
ATAAGCGTATATACACTATGTATACACAATGAAAAACTATCTCAAAAATGACAACCGAAT
CCGTATTTTTTTTTATGAAAAAAAAAAAAATTGTTATGAATCAATTCCAAGTTGAAAAAA
GAATCGAATATTCATTGATCAAATCATTCACTCCATAGTCTGATCGATCTTTTCTTTTGA
AAAACTGATTAATCGGACAAAAATAAAGATAGAGTCCCATTCTACATGTCAATATCAATA
CCGGCAACAATGAAATTTAGAGTAAGAGGAAAATCCGTCGACTTTAGAAATCGTGAGGGT
TCAAG
>SM01
AGTGATAA--CTTT-CAAA--TTCAGA-GAAACCCTGGAATC--AAAAATGGGCAATCCT
-GAGCCAAATCCT-GTTTTACAAGAACAAACAAGGGTTCAGAAAGCGAAAAAAAAA-AAG
GGGGATAGGTGCAGAGACTCAACGGAAGCTGTTCTAAGAAATGGGGTTGACTGCCTTTTT
TGGTAAAGAAAGGAAAAGAAATCCTTCTATCGAATATCGAAACTCCATAAAGGATGAAGG
ATAAGCGTATATACACTATGTATACACAATGAAAAACTATCTCAAAAATGACAACCGAAT
CCGTATTTTTTTTTATGAAAAAAAAAAAAATTGTTATGAATCAATTCCAAGTTGAAAAAA
GAATCGAATATTCATTGATCAAATCATTCACTCCATAGTCTGATCGATCTTTTCTTTTGA
AAAACTGATTAATCGGACAAAAATAAAGATAGAGTCCCATTCTACATGTCAATATCAATA
CCGGCAACAATGAAATTTAGAGTAAGAGGAAAATCCGTCGACTTTAGAAATCGTGAGGGT
TCAAG
>SM06
AGTGATAA--CTTT-CAAA--TTCAGA-GAAACCCTGGAATC--AAAAATGGGCAATCCT
-GAGCCAAATCCT-GTTTTACAAGAACAAACAAGGGTTCAGAAAGCGAAAAAAAAA-AAG
GGGGATAGGTGCAGAGACTCAACGGAAGCTGTTCTAAGAAATGGGGTTGACTGCCTTTTT
TGGTAAAGAAAGGAAAAGAAATCCTTCTATCGAATATCGAAACTCCATAAAGGATGAAGG
ATAAGCGTATATACACTATGTATACACAATGAAAAACTATCTCAAAAATGACAACCGAAT
CCGTATTTTTTTTTATGAAAAAAAAAAAAATTGTTATGAATCAATTCCAAGTTGAAAAAA
GAATCGAATATTCATTGATCAAATCATTCACTCCATAGTCTGATCGATCTTTTCTTTTGA
AAAACTGATTAATCGGACAAAAATAAAGATAGAGTCCCATTCTACATGTCAATATCAATA
CCGGCAACAATGAAATTTAGAGTAAGAGGAAAATCCGTCGACTTTAGAAATCGTGAGGGT
TCAAG
>PW13
AGTGATAA--CTTT-CAAA--TTCAGA-GAAACCCTGGAATC--AAAAATGGGCAATCCT
-GAGCCAAATCCT-GTTTTACAAGAACAAACAAGGGTTCAGAAAGCGAAAAAAAAA-AAG
GGGGATAGGTGCAGAGACTCAACGGAAGCTGTTCTAAGAAATGGGGTTGACTGCCTTTTT
TGGTAAAGAAAGGAAAAGAAATCCTTCTATCGAATATCGAAACTCCATAAAGGATGAAGG
ATAAGCGTATATACACTATGTATACACAATGAAAAACTATCTCAAAAATGACAACCGAAT
CCGTATTTTTTTTTATGAAAAAAAAAAAAATTGTTATGAATCAATTCCAAGTTGAAAAAA
GAATCGAATATTCATTGATCAAATCATTCACTCCATAGTCTGATCGATCTTTTCTTTTGA
AAAACTGATTAATCGGACAAAAATAAAGATAGAGTCCCATTCTACATGTCAATATCAATA
CCGGCAACAATGAAATTTAGAGTAAGAGGAAAATCCGTCGACTTTAGAAATCGTGAGGGT
TCAAG

H4
>LL03
AGTGATAA--CTTT-CAAA--TTCAGA-GAAACCCTGGAATC--AAAAATGGGCAATCCT
-GAGCCAAATCCT-GTTTTACAAGAACAAACAAGGGTTCAGAAAGCGAAAAAAAAA-AAG
GGGGATAGGTGCAGAGACTCAACGGAAGCTGTTCTAAGAAATGGGGTTGACTGCCTTTTT
TGGTAAAGAAAGGAAAAGAAATCCTTCTATCGAATATCGAAACTCCATAAAGGATGAAGG
ATAAGCGTATATACACTATGTATACACAATGAAAAACTATCTCAAAAATGACAACCGAAT
CCGTATTTTTTTTTATGAAAAAAAAAAAAATTGTTATGAATCAATTCCAAGTTGAAAAAA
GAATCGAATATTCATTGATCAAATCATTCACTCCATAGTCTGATCGATCTTTTCTTTTGA
AAAACTGATTAATCGGACAAAAATAAAGATAGAGTCCCATTCTACATGTCAATATCAATA
CCGGCAACAATGAAATTTAGAGTAAGAGGAAAATCCGTCAACTTTAGAAATCGTGAGGGT
TCAAG
>SM05
AGTGATAA--CTTT-CAAA--TTCAGA-GAAACCCTGGAATC--AAAAATGGGCAATCCT
-GAGCCAAATCCT-GTTTTACAAGAACAAACAAGGGTTCAGAAAGCGAAAAAAAAA-AAG
GGGGATAGGTGCAGAGACTCAACGGAAGCTGTTCTAAGAAATGGGGTTGACTGCCTTTTT
TGGTAAAGAAAGGAAAAGAAATCCTTCTATCGAATATCGAAACTCCATAAAGGATGAAGG
ATAAGCGTATATACACTATGTATACACAATGAAAAACTATCTCAAAAATGACAACCGAAT
CCGTATTTTTTTTTATGAAAAAAAAAAAAATTGTTATGAATCAATTCCAAGTTGAAAAAA
GAATCGAATATTCATTGATCAAATCATTCACTCCATAGTCTGATCGATCTTTTCTTTTGA
AAAACTGATTAATCGGACAAAAATAAAGATAGAGTCCCATTCTACATGTCAATATCAATA
CCGGCAACAATGAAATTTAGAGTAAGAGGAAAATCCGTCAACTTTAGAAATCGTGAGGGT
TCAAG
>SM07
AGTGATAA--CTTT-CAAA--TTCAGA-GAAACCCTGGAATC--AAAAATGGGCAATCCT
-GAGCCAAATCCT-GTTTTACAAGAACAAACAAGGGTTCAGAAAGCGAAAAAAAAA-AAG
GGGGATAGGTGCAGAGACTCAACGGAAGCTGTTCTAAGAAATGGGGTTGACTGCCTTTTT
TGGTAAAGAAAGGAAAAGAAATCCTTCTATCGAATATCGAAACTCCATAAAGGATGAAGG
ATAAGCGTATATACACTATGTATACACAATGAAAAACTATCTCAAAAATGACAACCGAAT
CCGTATTTTTTTTTATGAAAAAAAAAAAAATTGTTATGAATCAATTCCAAGTTGAAAAAA
GAATCGAATATTCATTGATCAAATCATTCACTCCATAGTCTGATCGATCTTTTCTTTTGA
AAAACTGATTAATCGGACAAAAATAAAGATAGAGTCCCATTCTACATGTCAATATCAATA
CCGGCAACAATGAAATTTAGAGTAAGAGGAAAATCCGTCAACTTTAGAAATCGTGAGGGT
TCAAG
>SM09
AGTGATAA--CTTT-CAAA--TTCAGA-GAAACCCTGGAATC--AAAAATGGGCAATCCT
-GAGCCAAATCCT-GTTTTACAAGAACAAACAAGGGTTCAGAAAGCGAAAAAAAAA-AAG
GGGGATAGGTGCAGAGACTCAACGGAAGCTGTTCTAAGAAATGGGGTTGACTGCCTTTTT
TGGTAAAGAAAGGAAAAGAAATCCTTCTATCGAATATCGAAACTCCATAAAGGATGAAGG
ATAAGCGTATATACACTATGTATACACAATGAAAAACTATCTCAAAAATGACAACCGAAT
CCGTATTTTTTTTTATGAAAAAAAAAAAAATTGTTATGAATCAATTCCAAGTTGAAAAAA
GAATCGAATATTCATTGATCAAATCATTCACTCCATAGTCTGATCGATCTTTTCTTTTGA
AAAACTGATTAATCGGACAAAAATAAAGATAGAGTCCCATTCTACATGTCAATATCAATA
CCGGCAACAATGAAATTTAGAGTAAGAGGAAAATCCGTCAACTTTAGAAATCGTGAGGGT
TCAAG
>PW14
AGTGATAA--CTTT-CAAA--TTCAGA-GAAACCCTGGAATC--AAAAATGGGCAATCCT
-GAGCCAAATCCT-GTTTTACAAGAACAAACAAGGGTTCAGAAAGCGAAAAAAAAA-AAG
GGGGATAGGTGCAGAGACTCAACGGAAGCTGTTCTAAGAAATGGGGTTGACTGCCTTTTT
TGGTAAAGAAAGGAAAAGAAATCCTTCTATCGAATATCGAAACTCCATAAAGGATGAAGG
ATAAGCGTATATACACTATGTATACACAATGAAAAACTATCTCAAAAATGACAACCGAAT
CCGTATTTTTTTTTATGAAAAAAAAAAAAATTGTTATGAATCAATTCCAAGTTGAAAAAA
GAATCGAATATTCATTGATCAAATCATTCACTCCATAGTCTGATCGATCTTTTCTTTTGA
AAAACTGATTAATCGGACAAAAATAAAGATAGAGTCCCATTCTACATGTCAATATCAATA
CCGGCAACAATGAAATTTAGAGTAAGAGGAAAATCCGTCAACTTTAGAAATCGTGAGGGT
TCAAG

H5
>LL07
AGTGATAA--CTTT-CAAA--TTCAGA-GAAACCCTGGAATC--AAAAATGGGCAATCCT
-GAGCCAAATCCT-GTTTTACAAGAACAAACAAGGGTTCAGAAAGCGAAAAAAAAA-AAG
GGGGATAGGTGCAGAGACTCAACGGAAGCTGTTCTAAGAAATGGGGTTGACTGCCTTTTT
TGGTAAAGAAAGGAAAAGAAATCCTTCTATCGAATATCGAAACTCCATAAAGGATGAAGG
ATAAGCGTATATACACTATGTATACACAATGAAAAACTATCTCAAAAATGACAACCGAAT
CCGTATTTTTTTTTATGAAAAAAAAAAAAATTGTTATGAATCAATTCCAAGTTGAAAAAA
GAATCGAATATTCATTGATCAAATCATTCACTCCATAGTCTGATCGATCTTTTCTTTTGA
AGAACTGATTAATCGGACAAGAATAAAGATAGAGTCCCATTCTACATGTCAATATCAATA
CCGGCAACAATGAAATTTAAAGTAAGAGGAAAATCCGTCGACTTTAGAAATCGTGAGGGT
TCAAG
>YR03
AGTGATAA--CTTT-CAAA--TTCAGA-GAAACCCTGGAATC--AAAAATGGGCAATCCT
-GAGCCAAATCCT-GTTTTACAAGAACAAACAAGGGTTCAGAAAGCGAAAAAAAAA-AAG
GGGGATAGGTGCAGAGACTCAACGGAAGCTGTTCTAAGAAATGGGGTTGACTGCCTTTTT
TGGTAAAGAAAGGAAAAGAAATCCTTCTATCGAATATCGAAACTCCATAAAGGATGAAGG
ATAAGCGTATATACACTATGTATACACAATGAAAAACTATCTCAAAAATGACAACCGAAT
CCGTATTTTTTTTTATGAAAAAAAAAAAAATTGTTATGAATCAATTCCAAGTTGAAAAAA
GAATCGAATATTCATTGATCAAATCATTCACTCCATAGTCTGATCGATCTTTTCTTTTGA
AGAACTGATTAATCGGACAAGAATAAAGATAGAGTCCCATTCTACATGTCAATATCAATA
CCGGCAACAATGAAATTTAAAGTAAGAGGAAAATCCGTCGACTTTAGAAATCGTGAGGGT
TCAAG

H6
>XL09
AGTGATAA--CTTT-CAAA--TTCAGA-GAAACCCTGGAATC--AAAAATGGGCAATCCT
-GAGCCAAATCCT-GTTTTACAAGAACAAACAAGGGTTCAGAAAGCGAAAAAAAAA-AAG
GGGGATAGGTGCAAAGACTCAACGGAAGCTGTTCTAAAAAATGGGGTTGACTGCCTTTTT
TGGTAAAAAAAGGAAAAAAAATCCTTCTATCGAATATCGAAACTCCATAAAGGATGAAGG
ATAAGCGTATATACACTATGTATACACAATGAAAAACTATCTCAAAAATGACAACCGAAT
CCGTATTTTTTTTTATGAAAAAAAAAAAAATTGTTATGAATCAATTCCAAGTTGAAAAAA
GAATCGAATATTCATTGATCAAATCATTCACTCCATAGTCTGATCGATCTTTTCTTTTGA
AAAACTGATTAATCGGACAAAAATAAAGATAGAGTCCCATTCTACATGTCAATATCAATA
CCGGCAACAATGAAATTTAAAGTAAGAGGAAAATCCGTCGACTTTAAAAATCGTGAGGGT
TCAAG
>BS06
AGTGATAA--CTTT-CAAA--TTCAGA-GAAACCCTGGAATC--AAAAATGGGCAATCCT
-GAGCCAAATCCT-GTTTTACAAGAACAAACAAGGGTTCAGAAAGCGAAAAAAAAA-AAG
GGGGATAGGTGCAAAGACTCAACGGAAGCTGTTCTAAAAAATGGGGTTGACTGCCTTTTT
TGGTAAAAAAAGGAAAAAAAATCCTTCTATCGAATATCGAAACTCCATAAAGGATGAAGG
ATAAGCGTATATACACTATGTATACACAATGAAAAACTATCTCAAAAATGACAACCGAAT
CCGTATTTTTTTTTATGAAAAAAAAAAAAATTGTTATGAATCAATTCCAAGTTGAAAAAA
GAATCGAATATTCATTGATCAAATCATTCACTCCATAGTCTGATCGATCTTTTCTTTTGA
AAAACTGATTAATCGGACAAAAATAAAGATAGAGTCCCATTCTACATGTCAATATCAATA
CCGGCAACAATGAAATTTAAAGTAAGAGGAAAATCCGTCGACTTTAAAAATCGTGAGGGT
TCAAG

H7
>XL10
AGTGATAA--CTTT-CAAA--TTCAGA-GAAACCCTGGAATC--AAAAATGGGCAATCCT
-GAGCCAAATCCT-GTTTTACAAGAACAAACAAGGGTTCAGAAAGCGAAAAAAAAA-AAG
GGGGATAGGTGCAGAGACTCAACGGAAGCTGTTCTAAAAAATGGGGTTGACTGCCTTTTT
TGGTAAAGAAAGGAAAAGAAATCCTTCTATCGAATATCGAAACTCCATAAAGGATGAAGG
ATAAGCGTATATACACTATGTATACACAATGAAAAACTATCTCAAAAATGACAACCGAAT
CCGTATTTTTTTTTATGAAAAAAAAAAAAATTGTTATGAATCAATTCCAAGTTGAAAAAA
GAATCGAATATTCATTGATCAAATCATTCACTCCATAGTCTGATCGATCTTTTCTTTTGA
AAAACTGATTAATCGGACAAAAATAAAGATAGAGTCCCATTCTACATGTCAATATCAATA
CCGGCAACAATGAAATTTAAAGTAAGAGGAAAATCCGTCGACTTTAAAAATCGGGAGGGT
TCAAG
>YR12
AGTGATAA--CTTT-CAAA--TTCAGA-GAAACCCTGGAATC--AAAAATGGGCAATCCT
-GAGCCAAATCCT-GTTTTACAAGAACAAACAAGGGTTCAGAAAGCGAAAAAAAAA-AAG
GGGGATAGGTGCAGAGACTCAACGGAAGCTGTTCTAAAAAATGGGGTTGACTGCCTTTTT
TGGTAAAGAAAGGAAAAGAAATCCTTCTATCGAATATCGAAACTCCATAAAGGATGAAGG
ATAAGCGTATATACACTATGTATACACAATGAAAAACTATCTCAAAAATGACAACCGAAT
CCGTATTTTTTTTTATGAAAAAAAAAAAAATTGTTATGAATCAATTCCAAGTTGAAAAAA
GAATCGAATATTCATTGATCAAATCATTCACTCCATAGTCTGATCGATCTTTTCTTTTGA
AAAACTGATTAATCGGACAAAAATAAAGATAGAGTCCCATTCTACATGTCAATATCAATA
CCGGCAACAATGAAATTTAAAGTAAGAGGAAAATCCGTCGACTTTAAAAATCGGGAGGGT
TCAAG
>BS07
AGTGATAA--CTTT-CAAA--TTCAGA-GAAACCCTGGAATC--AAAAATGGGCAATCCT
-GAGCCAAATCCT-GTTTTACAAGAACAAACAAGGGTTCAGAAAGCGAAAAAAAAA-AAG
GGGGATAGGTGCAGAGACTCAACGGAAGCTGTTCTAAAAAATGGGGTTGACTGCCTTTTT
TGGTAAAGAAAGGAAAAGAAATCCTTCTATCGAATATCGAAACTCCATAAAGGATGAAGG
ATAAGCGTATATACACTATGTATACACAATGAAAAACTATCTCAAAAATGACAACCGAAT
CCGTATTTTTTTTTATGAAAAAAAAAAAAATTGTTATGAATCAATTCCAAGTTGAAAAAA
GAATCGAATATTCATTGATCAAATCATTCACTCCATAGTCTGATCGATCTTTTCTTTTGA
AAAACTGATTAATCGGACAAAAATAAAGATAGAGTCCCATTCTACATGTCAATATCAATA
CCGGCAACAATGAAATTTAAAGTAAGAGGAAAATCCGTCGACTTTAAAAATCGGGAGGGT
TCAAG


H8
>XL13
AGTGATAA--CTTT-CAAA--TTCAGA-GAAACCCTGGAATC--AAAAATGGGCAATCCT
-GAGCCAAATCCT-GTTTTACAAGAACAAACAAGGGTTCAGAAAGCGAAAAAAAAA-AAG
GGGGATAGGTGCAGAGACTCAACGGAAGCTGTTCTAAAAAATGGGGTTGACTGCCTTTTT
TGGTAAAGAAAGGAAAAGAAATCCTTCTATCGAATATCGAAACTCCATAAAGGATGAAGG
ATAAGCGTATATACACTATGTATACACAATGAAAAACTATCTCAAAAATGACAACCGAAT
CCGTATTTTTTTTTATGAAAAAAAAAAAAATTGTTATGAATCAATTCCAAGTTGAAAAAA
GAATCGAATATTCATTGATCAAATCATTCACTCCATAGTCTGATCGATCTTTTCTTTTGA
AAAACTGATTAATCGGACAAGAATAAAGATAGAGTCCCATTCTACATGTCAATATCAATA
CCGGCAACAATGAAATTTAAAGTAAGAGGAAAATCCGTCGACTTTAAAAATCGTGAGGGT
TCAAG
>WM04
AGTGATAA--CTTT-CAAA--TTCAGA-GAAACCCTGGAATC--AAAAATGGGCAATCCT
-GAGCCAAATCCT-GTTTTACAAGAACAAACAAGGGTTCAGAAAGCGAAAAAAAAA-AAG
GGGGATAGGTGCAGAGACTCAACGGAAGCTGTTCTAAAAAATGGGGTTGACTGCCTTTTT
TGGTAAAGAAAGGAAAAGAAATCCTTCTATCGAATATCGAAACTCCATAAAGGATGAAGG
ATAAGCGTATATACACTATGTATACACAATGAAAAACTATCTCAAAAATGACAACCGAAT
CCGTATTTTTTTTTATGAAAAAAAAAAAAATTGTTATGAATCAATTCCAAGTTGAAAAAA
GAATCGAATATTCATTGATCAAATCATTCACTCCATAGTCTGATCGATCTTTTCTTTTGA
AAAACTGATTAATCGGACAAGAATAAAGATAGAGTCCCATTCTACATGTCAATATCAATA
CCGGCAACAATGAAATTTAAAGTAAGAGGAAAATCCGTCGACTTTAAAAATCGTGAGGGT
TCAAG
>YR15
AGTGATAA--CTTT-CAAA--TTCAGA-GAAACCCTGGAATC--AAAAATGGGCAATCCT
-GAGCCAAATCCT-GTTTTACAAGAACAAACAAGGGTTCAGAAAGCGAAAAAAAAA-AAG
GGGGATAGGTGCAGAGACTCAACGGAAGCTGTTCTAAAAAATGGGGTTGACTGCCTTTTT
TGGTAAAGAAAGGAAAAGAAATCCTTCTATCGAATATCGAAACTCCATAAAGGATGAAGG
ATAAGCGTATATACACTATGTATACACAATGAAAAACTATCTCAAAAATGACAACCGAAT
CCGTATTTTTTTTTATGAAAAAAAAAAAAATTGTTATGAATCAATTCCAAGTTGAAAAAA
GAATCGAATATTCATTGATCAAATCATTCACTCCATAGTCTGATCGATCTTTTCTTTTGA
AAAACTGATTAATCGGACAAGAATAAAGATAGAGTCCCATTCTACATGTCAATATCAATA
CCGGCAACAATGAAATTTAAAGTAAGAGGAAAATCCGTCGACTTTAAAAATCGTGAGGGT
TCAAG
>YR23
AGTGATAA--CTTT-CAAA--TTCAGA-GAAACCCTGGAATC--AAAAATGGGCAATCCT
-GAGCCAAATCCT-GTTTTACAAGAACAAACAAGGGTTCAGAAAGCGAAAAAAAAA-AAG
GGGGATAGGTGCAGAGACTCAACGGAAGCTGTTCTAAAAAATGGGGTTGACTGCCTTTTT
TGGTAAAGAAAGGAAAAGAAATCCTTCTATCGAATATCGAAACTCCATAAAGGATGAAGG
ATAAGCGTATATACACTATGTATACACAATGAAAAACTATCTCAAAAATGACAACCGAAT
CCGTATTTTTTTTTATGAAAAAAAAAAAAATTGTTATGAATCAATTCCAAGTTGAAAAAA
GAATCGAATATTCATTGATCAAATCATTCACTCCATAGTCTGATCGATCTTTTCTTTTGA
AAAACTGATTAATCGGACAAGAATAAAGATAGAGTCCCATTCTACATGTCAATATCAATA
CCGGCAACAATGAAATTTAAAGTAAGAGGAAAATCCGTCGACTTTAAAAATCGTGAGGGT
TCAAG
>YF08
AGTGATAA--CTTT-CAAA--TTCAGA-GAAACCCTGGAATC--AAAAATGGGCAATCCT
-GAGCCAAATCCT-GTTTTACAAGAACAAACAAGGGTTCAGAAAGCGAAAAAAAAA-AAG
GGGGATAGGTGCAGAGACTCAACGGAAGCTGTTCTAAAAAATGGGGTTGACTGCCTTTTT
TGGTAAAGAAAGGAAAAGAAATCCTTCTATCGAATATCGAAACTCCATAAAGGATGAAGG
ATAAGCGTATATACACTATGTATACACAATGAAAAACTATCTCAAAAATGACAACCGAAT
CCGTATTTTTTTTTATGAAAAAAAAAAAAATTGTTATGAATCAATTCCAAGTTGAAAAAA
GAATCGAATATTCATTGATCAAATCATTCACTCCATAGTCTGATCGATCTTTTCTTTTGA
AAAACTGATTAATCGGACAAGAATAAAGATAGAGTCCCATTCTACATGTCAATATCAATA
CCGGCAACAATGAAATTTAAAGTAAGAGGAAAATCCGTCGACTTTAAAAATCGTGAGGGT
TCAAG
>YF09
AGTGATAA--CTTT-CAAA--TTCAGA-GAAACCCTGGAATC--AAAAATGGGCAATCCT
-GAGCCAAATCCT-GTTTTACAAGAACAAACAAGGGTTCAGAAAGCGAAAAAAAAA-AAG
GGGGATAGGTGCAGAGACTCAACGGAAGCTGTTCTAAAAAATGGGGTTGACTGCCTTTTT
TGGTAAAGAAAGGAAAAGAAATCCTTCTATCGAATATCGAAACTCCATAAAGGATGAAGG
ATAAGCGTATATACACTATGTATACACAATGAAAAACTATCTCAAAAATGACAACCGAAT
CCGTATTTTTTTTTATGAAAAAAAAAAAAATTGTTATGAATCAATTCCAAGTTGAAAAAA
GAATCGAATATTCATTGATCAAATCATTCACTCCATAGTCTGATCGATCTTTTCTTTTGA
AAAACTGATTAATCGGACAAGAATAAAGATAGAGTCCCATTCTACATGTCAATATCAATA
CCGGCAACAATGAAATTTAAAGTAAGAGGAAAATCCGTCGACTTTAAAAATCGTGAGGGT
TCAAG

H9
>SM02
AGTGATAA--CTTT-CAAA--TTCAGA-GAAACCCTGGAATC--AAAAATGGGCAATCCT
-GAGCCAAATCCT-GTTTTACAAGAACAAACAAGGGTTCAGAAAGCGAAAAAAAAA-A-G
GGGGATAGGTGCAGAGACTCAACGGAAGCTGTTCTAAGAAATGGGGTTGACTGCCTTTTT
TGGTAAAGAAAGGAAAAGAAATCCTTCTATCGAATATCGAAACTCCATAAAGGATGAAGG
ATAAGCGTATATACACTATGTATACACAATGAAAAACTATCTCAAAAATGACAACCGAAT
CCGTATTTTTTTTTATGAAAAAAAAAAGAATTGTTATGAATCAATTCCAAGTTGAAGAAA
GAATCGAATATTCATTGATCAAATCATTCACTCCATAGTCTGATCGATCTTTTCTTTTGA
AGAACTGATTAATCGGACAAGAATAAAGATAGAGTCCCATTCTACATGTCAATATCAATA
CCGGCAACAATGAAATTTAGAGTAAGAGGAAAATCCGTCGACTTTAGAAATCGTGAGGGT
TCAAG
>SM08
AGTGATAA--CTTT-CAAA--TTCAGA-GAAACCCTGGAATC--AAAAATGGGCAATCCT
-GAGCCAAATCCT-GTTTTACAAGAACAAACAAGGGTTCAGAAAGCGAAAAAAAAA-A-G
GGGGATAGGTGCAGAGACTCAACGGAAGCTGTTCTAAGAAATGGGGTTGACTGCCTTTTT
TGGTAAAGAAAGGAAAAGAAATCCTTCTATCGAATATCGAAACTCCATAAAGGATGAAGG
ATAAGCGTATATACACTATGTATACACAATGAAAAACTATCTCAAAAATGACAACCGAAT
CCGTATTTTTTTTTATGAAAAAAAAAAGAATTGTTATGAATCAATTCCAAGTTGAAGAAA
GAATCGAATATTCATTGATCAAATCATTCACTCCATAGTCTGATCGATCTTTTCTTTTGA
AGAACTGATTAATCGGACAAGAATAAAGATAGAGTCCCATTCTACATGTCAATATCAATA
CCGGCAACAATGAAATTTAGAGTAAGAGGAAAATCCGTCGACTTTAGAAATCGTGAGGGT
TCAAG
>SM11
AGTGATAA--CTTT-CAAA--TTCAGA-GAAACCCTGGAATC--AAAAATGGGCAATCCT
-GAGCCAAATCCT-GTTTTACAAGAACAAACAAGGGTTCAGAAAGCGAAAAAAAAA-A-G
GGGGATAGGTGCAGAGACTCAACGGAAGCTGTTCTAAGAAATGGGGTTGACTGCCTTTTT
TGGTAAAGAAAGGAAAAGAAATCCTTCTATCGAATATCGAAACTCCATAAAGGATGAAGG
ATAAGCGTATATACACTATGTATACACAATGAAAAACTATCTCAAAAATGACAACCGAAT
CCGTATTTTTTTTTATGAAAAAAAAAAGAATTGTTATGAATCAATTCCAAGTTGAAGAAA
GAATCGAATATTCATTGATCAAATCATTCACTCCATAGTCTGATCGATCTTTTCTTTTGA
AGAACTGATTAATCGGACAAGAATAAAGATAGAGTCCCATTCTACATGTCAATATCAATA
CCGGCAACAATGAAATTTAGAGTAAGAGGAAAATCCGTCGACTTTAGAAATCGTGAGGGT
TCAAG
>YR01
AGTGATAA--CTTT-CAAA--TTCAGA-GAAACCCTGGAATC--AAAAATGGGCAATCCT
-GAGCCAAATCCT-GTTTTACAAGAACAAACAAGGGTTCAGAAAGCGAAAAAAAAA-A-G
GGGGATAGGTGCAGAGACTCAACGGAAGCTGTTCTAAGAAATGGGGTTGACTGCCTTTTT
TGGTAAAGAAAGGAAAAGAAATCCTTCTATCGAATATCGAAACTCCATAAAGGATGAAGG
ATAAGCGTATATACACTATGTATACACAATGAAAAACTATCTCAAAAATGACAACCGAAT
CCGTATTTTTTTTTATGAAAAAAAAAAGAATTGTTATGAATCAATTCCAAGTTGAAGAAA
GAATCGAATATTCATTGATCAAATCATTCACTCCATAGTCTGATCGATCTTTTCTTTTGA
AGAACTGATTAATCGGACAAGAATAAAGATAGAGTCCCATTCTACATGTCAATATCAATA
CCGGCAACAATGAAATTTAGAGTAAGAGGAAAATCCGTCGACTTTAGAAATCGTGAGGGT
TCAAG
>JX16
AGTGATAA--CTTT-CAAA--TTCAGA-GAAACCCTGGAATC--AAAAATGGGCAATCCT
-GAGCCAAATCCT-GTTTTACAAGAACAAACAAGGGTTCAGAAAGCGAAAAAAAAA-A-G
GGGGATAGGTGCAGAGACTCAACGGAAGCTGTTCTAAGAAATGGGGTTGACTGCCTTTTT
TGGTAAAGAAAGGAAAAGAAATCCTTCTATCGAATATCGAAACTCCATAAAGGATGAAGG
ATAAGCGTATATACACTATGTATACACAATGAAAAACTATCTCAAAAATGACAACCGAAT
CCGTATTTTTTTTTATGAAAAAAAAAAGAATTGTTATGAATCAATTCCAAGTTGAAGAAA
GAATCGAATATTCATTGATCAAATCATTCACTCCATAGTCTGATCGATCTTTTCTTTTGA
AGAACTGATTAATCGGACAAGAATAAAGATAGAGTCCCATTCTACATGTCAATATCAATA
CCGGCAACAATGAAATTTAGAGTAAGAGGAAAATCCGTCGACTTTAGAAATCGTGAGGGT
TCAAG
>LC11
AGTGATAA--CTTT-CAAA--TTCAGA-GAAACCCTGGAATC--AAAAATGGGCAATCCT
-GAGCCAAATCCT-GTTTTACAAGAACAAACAAGGGTTCAGAAAGCGAAAAAAAAA-A-G
GGGGATAGGTGCAGAGACTCAACGGAAGCTGTTCTAAGAAATGGGGTTGACTGCCTTTTT
TGGTAAAGAAAGGAAAAGAAATCCTTCTATCGAATATCGAAACTCCATAAAGGATGAAGG
ATAAGCGTATATACACTATGTATACACAATGAAAAACTATCTCAAAAATGACAACCGAAT
CCGTATTTTTTTTTATGAAAAAAAAAAGAATTGTTATGAATCAATTCCAAGTTGAAGAAA
GAATCGAATATTCATTGATCAAATCATTCACTCCATAGTCTGATCGATCTTTTCTTTTGA
AGAACTGATTAATCGGACAAGAATAAAGATAGAGTCCCATTCTACATGTCAATATCAATA
CCGGCAACAATGAAATTTAGAGTAAGAGGAAAATCCGTCGACTTTAGAAATCGTGAGGGT
TCAAG


H10
>XL18
AGTGATAA--CTTT-C--AAATTCAGA-GAAACCCTGGAATC--AAAAATGGGCAATCCT
-GAGCCAAATCCT-GTTTTACAAGAACAAACAAGGGTTCAGAAAGCGAAAAAAAAA-AAG
GGGGATAGGTGCAAAGACTCAACGGAAGCTGTTCTAAAAAATGGGGTTGACTGCCTTTTT
TGGTAAAGAAAGGAAAAGAAATCCTTCTATCGAATATCGAAACTCCATAAAGGATGAAGG
ATAAGCGTATATACACTATGTATACACAATGAAAAACTATCTCAAAAATGACAACCGAAT
CCGTATTTTTTTTTATGAAAAAAAAAAAAATTGTTATGAATCAATTCCAAGTTGAAAAAA
GAATCGAATATTCATTGATCAAATCATTCACTCCATAGTCTGATCGATCTTTTCTTTTGA
AAAACTGATTAATCGGACAAAAATAAAGATAGAGTCCCATTCTACATGTCAATATCAATA
CCGGCAACAATGAAATTTAAAGTAAGAGGAAAATCCGTCGACTTTAAAAATCGTGAGGGT
TCAAG
>XL21
AGTGATAA--CTTT-C--AAATTCAGA-GAAACCCTGGAATC--AAAAATGGGCAATCCT
-GAGCCAAATCCT-GTTTTACAAGAACAAACAAGGGTTCAGAAAGCGAAAAAAAAA-AAG
GGGGATAGGTGCAAAGACTCAACGGAAGCTGTTCTAAAAAATGGGGTTGACTGCCTTTTT
TGGTAAAGAAAGGAAAAGAAATCCTTCTATCGAATATCGAAACTCCATAAAGGATGAAGG
ATAAGCGTATATACACTATGTATACACAATGAAAAACTATCTCAAAAATGACAACCGAAT
CCGTATTTTTTTTTATGAAAAAAAAAAAAATTGTTATGAATCAATTCCAAGTTGAAAAAA
GAATCGAATATTCATTGATCAAATCATTCACTCCATAGTCTGATCGATCTTTTCTTTTGA
AAAACTGATTAATCGGACAAAAATAAAGATAGAGTCCCATTCTACATGTCAATATCAATA
CCGGCAACAATGAAATTTAAAGTAAGAGGAAAATCCGTCGACTTTAAAAATCGTGAGGGT
TCAAG
>XL22
AGTGATAA--CTTT-C--AAATTCAGA-GAAACCCTGGAATC--AAAAATGGGCAATCCT
-GAGCCAAATCCT-GTTTTACAAGAACAAACAAGGGTTCAGAAAGCGAAAAAAAAA-AAG
GGGGATAGGTGCAAAGACTCAACGGAAGCTGTTCTAAAAAATGGGGTTGACTGCCTTTTT
TGGTAAAGAAAGGAAAAGAAATCCTTCTATCGAATATCGAAACTCCATAAAGGATGAAGG
ATAAGCGTATATACACTATGTATACACAATGAAAAACTATCTCAAAAATGACAACCGAAT
CCGTATTTTTTTTTATGAAAAAAAAAAAAATTGTTATGAATCAATTCCAAGTTGAAAAAA
GAATCGAATATTCATTGATCAAATCATTCACTCCATAGTCTGATCGATCTTTTCTTTTGA
AAAACTGATTAATCGGACAAAAATAAAGATAGAGTCCCATTCTACATGTCAATATCAATA
CCGGCAACAATGAAATTTAAAGTAAGAGGAAAATCCGTCGACTTTAAAAATCGTGAGGGT
TCAAG
>BS01
AGTGATAA--CTTT-C--AAATTCAGA-GAAACCCTGGAATC--AAAAATGGGCAATCCT
-GAGCCAAATCCT-GTTTTACAAGAACAAACAAGGGTTCAGAAAGCGAAAAAAAAA-AAG
GGGGATAGGTGCAAAGACTCAACGGAAGCTGTTCTAAAAAATGGGGTTGACTGCCTTTTT
TGGTAAAGAAAGGAAAAGAAATCCTTCTATCGAATATCGAAACTCCATAAAGGATGAAGG
ATAAGCGTATATACACTATGTATACACAATGAAAAACTATCTCAAAAATGACAACCGAAT
CCGTATTTTTTTTTATGAAAAAAAAAAAAATTGTTATGAATCAATTCCAAGTTGAAAAAA
GAATCGAATATTCATTGATCAAATCATTCACTCCATAGTCTGATCGATCTTTTCTTTTGA
AAAACTGATTAATCGGACAAAAATAAAGATAGAGTCCCATTCTACATGTCAATATCAATA
CCGGCAACAATGAAATTTAAAGTAAGAGGAAAATCCGTCGACTTTAAAAATCGTGAGGGT
TCAAG
>LD11
AGTGATAA--CTTT-C--AAATTCAGA-GAAACCCTGGAATC--AAAAATGGGCAATCCT
-GAGCCAAATCCT-GTTTTACAAGAACAAACAAGGGTTCAGAAAGCGAAAAAAAAA-AAG
GGGGATAGGTGCAAAGACTCAACGGAAGCTGTTCTAAAAAATGGGGTTGACTGCCTTTTT
TGGTAAAGAAAGGAAAAGAAATCCTTCTATCGAATATCGAAACTCCATAAAGGATGAAGG
ATAAGCGTATATACACTATGTATACACAATGAAAAACTATCTCAAAAATGACAACCGAAT
CCGTATTTTTTTTTATGAAAAAAAAAAAAATTGTTATGAATCAATTCCAAGTTGAAAAAA
GAATCGAATATTCATTGATCAAATCATTCACTCCATAGTCTGATCGATCTTTTCTTTTGA
AAAACTGATTAATCGGACAAAAATAAAGATAGAGTCCCATTCTACATGTCAATATCAATA
CCGGCAACAATGAAATTTAAAGTAAGAGGAAAATCCGTCGACTTTAAAAATCGTGAGGGT
TCAAG
>PW18
AGTGATAA--CTTT-C--AAATTCAGA-GAAACCCTGGAATC--AAAAATGGGCAATCCT
-GAGCCAAATCCT-GTTTTACAAGAACAAACAAGGGTTCAGAAAGCGAAAAAAAAA-AAG
GGGGATAGGTGCAAAGACTCAACGGAAGCTGTTCTAAAAAATGGGGTTGACTGCCTTTTT
TGGTAAAGAAAGGAAAAGAAATCCTTCTATCGAATATCGAAACTCCATAAAGGATGAAGG
ATAAGCGTATATACACTATGTATACACAATGAAAAACTATCTCAAAAATGACAACCGAAT
CCGTATTTTTTTTTATGAAAAAAAAAAAAATTGTTATGAATCAATTCCAAGTTGAAAAAA
GAATCGAATATTCATTGATCAAATCATTCACTCCATAGTCTGATCGATCTTTTCTTTTGA
AAAACTGATTAATCGGACAAAAATAAAGATAGAGTCCCATTCTACATGTCAATATCAATA
CCGGCAACAATGAAATTTAAAGTAAGAGGAAAATCCGTCGACTTTAAAAATCGTGAGGGT
TCAAG

H11
>SM04
AGTGATAA--CTTT-CAAA--TTCAGA-GAAACCCTGGAATC--AAAAATGGGCAATCCT
-GAGCCAAATCCT-GTTTTACAAGAACAAACAAGGGTTCAGAAAGCGAAAAAAAAA-AAG
GGGGATAGGTGCAGAGACTCAACGGAAGCTGTTCTAAGAAATGGGGTTGACTGCCTTTTT
TGGTAAAGAAAGGAAAAGAAATCCTTCTATCGAATATCGAAACTCCATAAAGGATGAAGG
ATAAGCGTATATACACTATGTATACACAATGAAAAACTATCTCAAAAATGACAACCGAAT
CCGTATTTTTTTTTATGAAAAAAAAAAAAATTGTTATGAATCAATTCCAAGTTGAAAAAA
GAATCGAATATTCATTGATCAAATCATTCACTCCATAGTCTGATCGATCTTTTCTTTTGA
AAAACTGATTAATCGGACAAAAATAAAGATAGAGTCCCATTCTACATGTCAATATCAATA
CCGGCAACAATGAAATTTAGAGTAAGAGGAAAATCCGTCGACTTTAAAAATCGTGAGGGT
TCAAG
>YR11
AGTGATAA--CTTT-CAAA--TTCAGA-GAAACCCTGGAATC--AAAAATGGGCAATCCT
-GAGCCAAATCCT-GTTTTACAAGAACAAACAAGGGTTCAGAAAGCGAAAAAAAAA-AAG
GGGGATAGGTGCAGAGACTCAACGGAAGCTGTTCTAAGAAATGGGGTTGACTGCCTTTTT
TGGTAAAGAAAGGAAAAGAAATCCTTCTATCGAATATCGAAACTCCATAAAGGATGAAGG
ATAAGCGTATATACACTATGTATACACAATGAAAAACTATCTCAAAAATGACAACCGAAT
CCGTATTTTTTTTTATGAAAAAAAAAAAAATTGTTATGAATCAATTCCAAGTTGAAAAAA
GAATCGAATATTCATTGATCAAATCATTCACTCCATAGTCTGATCGATCTTTTCTTTTGA
AAAACTGATTAATCGGACAAAAATAAAGATAGAGTCCCATTCTACATGTCAATATCAATA
CCGGCAACAATGAAATTTAGAGTAAGAGGAAAATCCGTCGACTTTAAAAATCGTGAGGGT
TCAAG


H12
>XL19
AGTGATAA--CTTT-CAAA--TTCAGA-GAAACCCTGGAATC--AAAAATGGGCAATCCT
-GAGCCAAATCCT-GTTTTACAAGAACAAACAAGGGTTCAGAAAGCGAAAAAAAAA-AAG
GGGGATAGGTGCAGAGACTCAACGGAAGCTGTTCTAAAAAATGGGGTTGACTGCCTTTTT
TGGTAAAGAAAGGAAAAGAAATCCTTCTATCGAATATCGAAACTCCATAAAGGATGAAGG
ATAAGCGTATATACACTATGTATACACAATGAAAAACTATCTCAAAAATGACAACCGAAT
CCGTATTTTTTTTTATGAAAAAAAAAAAAATTGTTATGAATCAATTCCAAGTTGAAAAAA
GAATCGAATATTCATTGATCAAATCATTCACTCCATAGTCTGATCGATCTTTTCTTTTGA
AAAACTGATTAATCGGACAAAAATAAAGATAGAGTCCCATTCTACATGTCAATATCAATA
CCGGCAACAATGAAATTTAAAGTAAAAGGAAAATCCGTCGACTTTAAAAATCGTGAGGGT
TCAAG
>YR19
AGTGATAA--CTTT-CAAA--TTCAGA-GAAACCCTGGAATC--AAAAATGGGCAATCCT
-GAGCCAAATCCT-GTTTTACAAGAACAAACAAGGGTTCAGAAAGCGAAAAAAAAA-AAG
GGGGATAGGTGCAGAGACTCAACGGAAGCTGTTCTAAAAAATGGGGTTGACTGCCTTTTT
TGGTAAAGAAAGGAAAAGAAATCCTTCTATCGAATATCGAAACTCCATAAAGGATGAAGG
ATAAGCGTATATACACTATGTATACACAATGAAAAACTATCTCAAAAATGACAACCGAAT
CCGTATTTTTTTTTATGAAAAAAAAAAAAATTGTTATGAATCAATTCCAAGTTGAAAAAA
GAATCGAATATTCATTGATCAAATCATTCACTCCATAGTCTGATCGATCTTTTCTTTTGA
AAAACTGATTAATCGGACAAAAATAAAGATAGAGTCCCATTCTACATGTCAATATCAATA
CCGGCAACAATGAAATTTAAAGTAAAAGGAAAATCCGTCGACTTTAAAAATCGTGAGGGT
TCAAG
>TL08
AGTGATAA--CTTT-CAAA--TTCAGA-GAAACCCTGGAATC--AAAAATGGGCAATCCT
-GAGCCAAATCCT-GTTTTACAAGAACAAACAAGGGTTCAGAAAGCGAAAAAAAAA-AAG
GGGGATAGGTGCAGAGACTCAACGGAAGCTGTTCTAAAAAATGGGGTTGACTGCCTTTTT
TGGTAAAGAAAGGAAAAGAAATCCTTCTATCGAATATCGAAACTCCATAAAGGATGAAGG
ATAAGCGTATATACACTATGTATACACAATGAAAAACTATCTCAAAAATGACAACCGAAT
CCGTATTTTTTTTTATGAAAAAAAAAAAAATTGTTATGAATCAATTCCAAGTTGAAAAAA
GAATCGAATATTCATTGATCAAATCATTCACTCCATAGTCTGATCGATCTTTTCTTTTGA
AAAACTGATTAATCGGACAAAAATAAAGATAGAGTCCCATTCTACATGTCAATATCAATA
CCGGCAACAATGAAATTTAAAGTAAAAGGAAAATCCGTCGACTTTAAAAATCGTGAGGGT
TCAAG
>PW21
AGTGATAA--CTTT-CAAA--TTCAGA-GAAACCCTGGAATC--AAAAATGGGCAATCCT
-GAGCCAAATCCT-GTTTTACAAGAACAAACAAGGGTTCAGAAAGCGAAAAAAAAA-AAG
GGGGATAGGTGCAGAGACTCAACGGAAGCTGTTCTAAAAAATGGGGTTGACTGCCTTTTT
TGGTAAAGAAAGGAAAAGAAATCCTTCTATCGAATATCGAAACTCCATAAAGGATGAAGG
ATAAGCGTATATACACTATGTATACACAATGAAAAACTATCTCAAAAATGACAACCGAAT
CCGTATTTTTTTTTATGAAAAAAAAAAAAATTGTTATGAATCAATTCCAAGTTGAAAAAA
GAATCGAATATTCATTGATCAAATCATTCACTCCATAGTCTGATCGATCTTTTCTTTTGA
AAAACTGATTAATCGGACAAAAATAAAGATAGAGTCCCATTCTACATGTCAATATCAATA
CCGGCAACAATGAAATTTAAAGTAAAAGGAAAATCCGTCGACTTTAAAAATCGTGAGGGT
TCAAG
>YF01
AGTGATAA--CTTT-CAAA--TTCAGA-GAAACCCTGGAATC--AAAAATGGGCAATCCT
-GAGCCAAATCCT-GTTTTACAAGAACAAACAAGGGTTCAGAAAGCGAAAAAAAAA-AAG
GGGGATAGGTGCAGAGACTCAACGGAAGCTGTTCTAAAAAATGGGGTTGACTGCCTTTTT
TGGTAAAGAAAGGAAAAGAAATCCTTCTATCGAATATCGAAACTCCATAAAGGATGAAGG
ATAAGCGTATATACACTATGTATACACAATGAAAAACTATCTCAAAAATGACAACCGAAT
CCGTATTTTTTTTTATGAAAAAAAAAAAAATTGTTATGAATCAATTCCAAGTTGAAAAAA
GAATCGAATATTCATTGATCAAATCATTCACTCCATAGTCTGATCGATCTTTTCTTTTGA
AAAACTGATTAATCGGACAAAAATAAAGATAGAGTCCCATTCTACATGTCAATATCAATA
CCGGCAACAATGAAATTTAAAGTAAAAGGAAAATCCGTCGACTTTAAAAATCGTGAGGGT
TCAAG
>TL21
AGTGATAA--CTTT-CAAA--TTCAGA-GAAACCCTGGAATC--AAAAATGGGCAATCCT
-GAGCCAAATCCT-GTTTTACAAGAACAAACAAGGGTTCAGAAAGCGAAAAAAAAA-AAG
GGGGATAGGTGCAGAGACTCAACGGAAGCTGTTCTAAAAAATGGGGTTGACTGCCTTTTT
TGGTAAAGAAAGGAAAAGAAATCCTTCTATCGAATATCGAAACTCCATAAAGGATGAAGG
ATAAGCGTATATACACTATGTATACACAATGAAAAACTATCTCAAAAATGACAACCGAAT
CCGTATTTTTTTTTATGAAAAAAAAAAAAATTGTTATGAATCAATTCCAAGTTGAAAAAA
GAATCGAATATTCATTGATCAAATCATTCACTCCATAGTCTGATCGATCTTTTCTTTTGA
AAAACTGATTAATCGGACAAAAATAAAGATAGAGTCCCATTCTACATGTCAATATCAATA
CCGGCAACAATGAAATTTAAAGTAAAAGGAAAATCCGTCGACTTTAAAAATCGTGAGGGT
TCAAG


H13
>CB12
AGTGATAA--CTTT-CAAA--TTCAGA-GAAACCCTGGAATC--AAAAATGGGTAATCCT
-GAGCCAAATCCT-GTTTTACAAGAACAAACAAGGGTTCAGAAAGCGAAAAAAAAA-GAA
GGGGATAGGTGCAGAGACTCAACGGAAGCTGTTCTAAGAAATGGGGTTGACTGCCTTTTT
TGGTAAAGAAAGGAAAAGAAATCCTTCTATCGAATATCGAAACTCCATAAAGGATGAAGG
ATAAGCGTATATACACTATGTATACACAATGAAAAACTATCTCAAAAATGACAACCGAAT
CCGTATTTTTTTT-ATGAAAAAGAAAAGAATTGTTATGAATCAATTCCAAGTTGAAGAAA
GAATCGAATATTCATTGATCAAATCATTCACTCCATAGTCTGATCGATCTTTTCTTTTGA
AGAACTGATTAATCGGACAAGAATAAAGATAGAGTCCCATTCTACATGTCAATATCAATA
CCGGCAACAATGAAATTTAGAGTAAGAGGAAAATCCGTCGACTTTAGAAATCGTGAGGGT
TCAAG
>CB14
AGTGATAA--CTTT-CAAA--TTCAGA-GAAACCCTGGAATC--AAAAATGGGTAATCCT
-GAGCCAAATCCT-GTTTTACAAGAACAAACAAGGGTTCAGAAAGCGAAAAAAAAA-GAA
GGGGATAGGTGCAGAGACTCAACGGAAGCTGTTCTAAGAAATGGGGTTGACTGCCTTTTT
TGGTAAAGAAAGGAAAAGAAATCCTTCTATCGAATATCGAAACTCCATAAAGGATGAAGG
ATAAGCGTATATACACTATGTATACACAATGAAAAACTATCTCAAAAATGACAACCGAAT
CCGTATTTTTTTT-ATGAAAAAGAAAAGAATTGTTATGAATCAATTCCAAGTTGAAGAAA
GAATCGAATATTCATTGATCAAATCATTCACTCCATAGTCTGATCGATCTTTTCTTTTGA
AGAACTGATTAATCGGACAAGAATAAAGATAGAGTCCCATTCTACATGTCAATATCAATA
CCGGCAACAATGAAATTTAGAGTAAGAGGAAAATCCGTCGACTTTAGAAATCGTGAGGGT
TCAAG
>CB15
AGTGATAA--CTTT-CAAA--TTCAGA-GAAACCCTGGAATC--AAAAATGGGTAATCCT
-GAGCCAAATCCT-GTTTTACAAGAACAAACAAGGGTTCAGAAAGCGAAAAAAAAA-GAA
GGGGATAGGTGCAGAGACTCAACGGAAGCTGTTCTAAGAAATGGGGTTGACTGCCTTTTT
TGGTAAAGAAAGGAAAAGAAATCCTTCTATCGAATATCGAAACTCCATAAAGGATGAAGG
ATAAGCGTATATACACTATGTATACACAATGAAAAACTATCTCAAAAATGACAACCGAAT
CCGTATTTTTTTT-ATGAAAAAGAAAAGAATTGTTATGAATCAATTCCAAGTTGAAGAAA
GAATCGAATATTCATTGATCAAATCATTCACTCCATAGTCTGATCGATCTTTTCTTTTGA
AGAACTGATTAATCGGACAAGAATAAAGATAGAGTCCCATTCTACATGTCAATATCAATA
CCGGCAACAATGAAATTTAGAGTAAGAGGAAAATCCGTCGACTTTAGAAATCGTGAGGGT
TCAAG
>CB19
AGTGATAA--CTTT-CAAA--TTCAGA-GAAACCCTGGAATC--AAAAATGGGTAATCCT
-GAGCCAAATCCT-GTTTTACAAGAACAAACAAGGGTTCAGAAAGCGAAAAAAAAA-GAA
GGGGATAGGTGCAGAGACTCAACGGAAGCTGTTCTAAGAAATGGGGTTGACTGCCTTTTT
TGGTAAAGAAAGGAAAAGAAATCCTTCTATCGAATATCGAAACTCCATAAAGGATGAAGG
ATAAGCGTATATACACTATGTATACACAATGAAAAACTATCTCAAAAATGACAACCGAAT
CCGTATTTTTTTT-ATGAAAAAGAAAAGAATTGTTATGAATCAATTCCAAGTTGAAGAAA
GAATCGAATATTCATTGATCAAATCATTCACTCCATAGTCTGATCGATCTTTTCTTTTGA
AGAACTGATTAATCGGACAAGAATAAAGATAGAGTCCCATTCTACATGTCAATATCAATA
CCGGCAACAATGAAATTTAGAGTAAGAGGAAAATCCGTCGACTTTAGAAATCGTGAGGGT
TCAAG
>CB21
AGTGATAA--CTTT-CAAA--TTCAGA-GAAACCCTGGAATC--AAAAATGGGTAATCCT
-GAGCCAAATCCT-GTTTTACAAGAACAAACAAGGGTTCAGAAAGCGAAAAAAAAA-GAA
GGGGATAGGTGCAGAGACTCAACGGAAGCTGTTCTAAGAAATGGGGTTGACTGCCTTTTT
TGGTAAAGAAAGGAAAAGAAATCCTTCTATCGAATATCGAAACTCCATAAAGGATGAAGG
ATAAGCGTATATACACTATGTATACACAATGAAAAACTATCTCAAAAATGACAACCGAAT
CCGTATTTTTTTT-ATGAAAAAGAAAAGAATTGTTATGAATCAATTCCAAGTTGAAGAAA
GAATCGAATATTCATTGATCAAATCATTCACTCCATAGTCTGATCGATCTTTTCTTTTGA
AGAACTGATTAATCGGACAAGAATAAAGATAGAGTCCCATTCTACATGTCAATATCAATA
CCGGCAACAATGAAATTTAGAGTAAGAGGAAAATCCGTCGACTTTAGAAATCGTGAGGGT
TCAAG
>CB22
AGTGATAA--CTTT-CAAA--TTCAGA-GAAACCCTGGAATC--AAAAATGGGTAATCCT
-GAGCCAAATCCT-GTTTTACAAGAACAAACAAGGGTTCAGAAAGCGAAAAAAAAA-GAA
GGGGATAGGTGCAGAGACTCAACGGAAGCTGTTCTAAGAAATGGGGTTGACTGCCTTTTT
TGGTAAAGAAAGGAAAAGAAATCCTTCTATCGAATATCGAAACTCCATAAAGGATGAAGG
ATAAGCGTATATACACTATGTATACACAATGAAAAACTATCTCAAAAATGACAACCGAAT
CCGTATTTTTTTT-ATGAAAAAGAAAAGAATTGTTATGAATCAATTCCAAGTTGAAGAAA
GAATCGAATATTCATTGATCAAATCATTCACTCCATAGTCTGATCGATCTTTTCTTTTGA
AGAACTGATTAATCGGACAAGAATAAAGATAGAGTCCCATTCTACATGTCAATATCAATA
CCGGCAACAATGAAATTTAGAGTAAGAGGAAAATCCGTCGACTTTAGAAATCGTGAGGGT
TCAAG


H14
>XL24
AGTGATAA--CTTT-CAAA--TTCAGA-GAAACCCTGGAATC--AAAAATGGGCAATCCT
-GAGCCAAATCCT-GTTTTACAAGAACAAACAAGGGTTCAGAAAGCGAAAAAAAAA-AAG
GGGGATAGGTGCAGAGACTCAACGGAAGCTGTTCTAAGAAATGGGGTTGACTGCCTTTTT
TGGTAAAGAAAGGAAAAGAAATCCTTCTATCGAATATCGAAACTCCATAAAGGATGAAGG
ATAAGCGTATATACACTATGTATACACAATGAAAAACTATCTCAAAAATGACAACCGAAT
CCGTATTTTTTTTTATGAAAAAAAAAAAAATTGTTATGAATCAATTCCAAGTTGAAAAAA
GAATCGAATATTCATTGATCAAATCATTCACTCCATAGTCTGATCGATCTTTTCTTTTGA
AAAACTGATTAATCGGACAAAAATAAAGATAGAGTCCCATTCTACATGTCAATATCAATA
CCGGCAACAATGAAATTTAAAGTAAAAGGAAAATCCGTCGACTTTAAAAATCGTGAGGGT
TCAAG
>YR24
AGTGATAA--CTTT-CAAA--TTCAGA-GAAACCCTGGAATC--AAAAATGGGCAATCCT
-GAGCCAAATCCT-GTTTTACAAGAACAAACAAGGGTTCAGAAAGCGAAAAAAAAA-AAG
GGGGATAGGTGCAGAGACTCAACGGAAGCTGTTCTAAGAAATGGGGTTGACTGCCTTTTT
TGGTAAAGAAAGGAAAAGAAATCCTTCTATCGAATATCGAAACTCCATAAAGGATGAAGG
ATAAGCGTATATACACTATGTATACACAATGAAAAACTATCTCAAAAATGACAACCGAAT
CCGTATTTTTTTTTATGAAAAAAAAAAAAATTGTTATGAATCAATTCCAAGTTGAAAAAA
GAATCGAATATTCATTGATCAAATCATTCACTCCATAGTCTGATCGATCTTTTCTTTTGA
AAAACTGATTAATCGGACAAAAATAAAGATAGAGTCCCATTCTACATGTCAATATCAATA
CCGGCAACAATGAAATTTAAAGTAAAAGGAAAATCCGTCGACTTTAAAAATCGTGAGGGT
TCAAG
>BS04
AGTGATAA--CTTT-CAAA--TTCAGA-GAAACCCTGGAATC--AAAAATGGGCAATCCT
-GAGCCAAATCCT-GTTTTACAAGAACAAACAAGGGTTCAGAAAGCGAAAAAAAAA-AAG
GGGGATAGGTGCAGAGACTCAACGGAAGCTGTTCTAAGAAATGGGGTTGACTGCCTTTTT
TGGTAAAGAAAGGAAAAGAAATCCTTCTATCGAATATCGAAACTCCATAAAGGATGAAGG
ATAAGCGTATATACACTATGTATACACAATGAAAAACTATCTCAAAAATGACAACCGAAT
CCGTATTTTTTTTTATGAAAAAAAAAAAAATTGTTATGAATCAATTCCAAGTTGAAAAAA
GAATCGAATATTCATTGATCAAATCATTCACTCCATAGTCTGATCGATCTTTTCTTTTGA
AAAACTGATTAATCGGACAAAAATAAAGATAGAGTCCCATTCTACATGTCAATATCAATA
CCGGCAACAATGAAATTTAAAGTAAAAGGAAAATCCGTCGACTTTAAAAATCGTGAGGGT
TCAAG


H15
>WM04
AGTGATAA--CTTT-CAAA--TTCAGA-GAAACCCTGGAATC--AAAAATGGGCAATCCT
-GAGCCAAATCCT-GTTTTACAAGAACAAACAAGGGTTCAGAAAGCGAAAAAAAAA-AAG
GGGGATAGGTGCAGAGACTCAACGGAAGCTGTTCTAAGAAATGGGGTTGACTGCCTTTTT
TGGTAAAGAAAGGAAAAGAAATCCTTCTATCGAATATCGAAACTCCATAAAGGATGAAGG
ATAAGCGTATATACACTATGTATACACAATGAAAAACTATCTCAAAAATGACAACCGAAT
CCGTATTTTTTTTTATGAAAAAAAAAAGAATTGTTATGAATCAATTCCAAGTTGAAAAAA
GAATCGAATATTCATTGATCAAATCATTCACTCCATAGTCTGATCGATCTTTTCTTTTGA
AAAACTGATTAATCGGACAAGAATAAAGATAGAGTCCCATTCTACATGTCAATATCAATA
CCGGCAACAATGAAATTTAAAGTAAGAGGAAAATCCGTCGACTTTAAAAATCGTGAGGGT
TCAAG
>YR13
AGTGATAA--CTTT-CAAA--TTCAGA-GAAACCCTGGAATC--AAAAATGGGCAATCCT
-GAGCCAAATCCT-GTTTTACAAGAACAAACAAGGGTTCAGAAAGCGAAAAAAAAA-AAG
GGGGATAGGTGCAGAGACTCAACGGAAGCTGTTCTAAGAAATGGGGTTGACTGCCTTTTT
TGGTAAAGAAAGGAAAAGAAATCCTTCTATCGAATATCGAAACTCCATAAAGGATGAAGG
ATAAGCGTATATACACTATGTATACACAATGAAAAACTATCTCAAAAATGACAACCGAAT
CCGTATTTTTTTTTATGAAAAAAAAAAGAATTGTTATGAATCAATTCCAAGTTGAAAAAA
GAATCGAATATTCATTGATCAAATCATTCACTCCATAGTCTGATCGATCTTTTCTTTTGA
AAAACTGATTAATCGGACAAGAATAAAGATAGAGTCCCATTCTACATGTCAATATCAATA
CCGGCAACAATGAAATTTAAAGTAAGAGGAAAATCCGTCGACTTTAAAAATCGTGAGGGT
TCAAG
>YR20
AGTGATAA--CTTT-CAAA--TTCAGA-GAAACCCTGGAATC--AAAAATGGGCAATCCT
-GAGCCAAATCCT-GTTTTACAAGAACAAACAAGGGTTCAGAAAGCGAAAAAAAAA-AAG
GGGGATAGGTGCAGAGACTCAACGGAAGCTGTTCTAAGAAATGGGGTTGACTGCCTTTTT
TGGTAAAGAAAGGAAAAGAAATCCTTCTATCGAATATCGAAACTCCATAAAGGATGAAGG
ATAAGCGTATATACACTATGTATACACAATGAAAAACTATCTCAAAAATGACAACCGAAT
CCGTATTTTTTTTTATGAAAAAAAAAAGAATTGTTATGAATCAATTCCAAGTTGAAAAAA
GAATCGAATATTCATTGATCAAATCATTCACTCCATAGTCTGATCGATCTTTTCTTTTGA
AAAACTGATTAATCGGACAAGAATAAAGATAGAGTCCCATTCTACATGTCAATATCAATA
CCGGCAACAATGAAATTTAAAGTAAGAGGAAAATCCGTCGACTTTAAAAATCGTGAGGGT
TCAAG
>LD07
AGTGATAA--CTTT-CAAA--TTCAGA-GAAACCCTGGAATC--AAAAATGGGCAATCCT
-GAGCCAAATCCT-GTTTTACAAGAACAAACAAGGGTTCAGAAAGCGAAAAAAAAA-AAG
GGGGATAGGTGCAGAGACTCAACGGAAGCTGTTCTAAGAAATGGGGTTGACTGCCTTTTT
TGGTAAAGAAAGGAAAAGAAATCCTTCTATCGAATATCGAAACTCCATAAAGGATGAAGG
ATAAGCGTATATACACTATGTATACACAATGAAAAACTATCTCAAAAATGACAACCGAAT
CCGTATTTTTTTTTATGAAAAAAAAAAGAATTGTTATGAATCAATTCCAAGTTGAAAAAA
GAATCGAATATTCATTGATCAAATCATTCACTCCATAGTCTGATCGATCTTTTCTTTTGA
AAAACTGATTAATCGGACAAGAATAAAGATAGAGTCCCATTCTACATGTCAATATCAATA
CCGGCAACAATGAAATTTAAAGTAAGAGGAAAATCCGTCGACTTTAAAAATCGTGAGGGT
TCAAG


H16
>DC03
AGTGATAA--CTTT-CAAA--TTCAGA-GAAACCCTGGAATC--AAAAATGGGCAATCCT
-GAGCCAAATCCT-GTTTTACAAGAACAAACAAGGGTTCAGAAAGCGAAAAAAAAAAAAG
GGGGATAGGTGCAAAAACTCAACGGAAGCTGTTCTAAAAAATGGGGTTGACTGCCTTTTT
TGGTAAAAAAAGGAAAAAAAATCCTTCTATCGAATATCGAAACTCCATAAAGGATGAAGG
ATAAGCGTATATACACTATGTATACACAATGAAAAACTATCTCAAAAATGACAACCGAAT
CCGTATTTTTTTTTATGAAAAAAAAAAAAATTGTTATGAATCAATTCCAAGTTGAAAAAA
AAATCGAATATTCTTTGATCAAATCATTCACTCCATAGTCTGATCGATCTTTTCTTTTGA
AAAACTGATTAATCGGACAAAAATAAAAATAGAGTCCCATTCTACATGTCAATATCAATA
CCGGCAACAATGAAATTTAAAGTAAAAGGAAAATCCGTCAACTTTAAAAATCGGGAGGGT
TCAAG
>HD15
AGTGATAA--CTTT-CAAA--TTCAGA-GAAACCCTGGAATC--AAAAATGGGCAATCCT
-GAGCCAAATCCT-GTTTTACAAGAACAAACAAGGGTTCAGAAAGCGAAAAAAAAAAAAG
GGGGATAGGTGCAAAAACTCAACGGAAGCTGTTCTAAAAAATGGGGTTGACTGCCTTTTT
TGGTAAAAAAAGGAAAAAAAATCCTTCTATCGAATATCGAAACTCCATAAAGGATGAAGG
ATAAGCGTATATACACTATGTATACACAATGAAAAACTATCTCAAAAATGACAACCGAAT
CCGTATTTTTTTTTATGAAAAAAAAAAAAATTGTTATGAATCAATTCCAAGTTGAAAAAA
AAATCGAATATTCTTTGATCAAATCATTCACTCCATAGTCTGATCGATCTTTTCTTTTGA
AAAACTGATTAATCGGACAAAAATAAAAATAGAGTCCCATTCTACATGTCAATATCAATA
CCGGCAACAATGAAATTTAAAGTAAAAGGAAAATCCGTCAACTTTAAAAATCGGGAGGGT
TCAAG
>HD16
AGTGATAA--CTTT-CAAA--TTCAGA-GAAACCCTGGAATC--AAAAATGGGCAATCCT
-GAGCCAAATCCT-GTTTTACAAGAACAAACAAGGGTTCAGAAAGCGAAAAAAAAAAAAG
GGGGATAGGTGCAAAAACTCAACGGAAGCTGTTCTAAAAAATGGGGTTGACTGCCTTTTT
TGGTAAAAAAAGGAAAAAAAATCCTTCTATCGAATATCGAAACTCCATAAAGGATGAAGG
ATAAGCGTATATACACTATGTATACACAATGAAAAACTATCTCAAAAATGACAACCGAAT
CCGTATTTTTTTTTATGAAAAAAAAAAAAATTGTTATGAATCAATTCCAAGTTGAAAAAA
AAATCGAATATTCTTTGATCAAATCATTCACTCCATAGTCTGATCGATCTTTTCTTTTGA
AAAACTGATTAATCGGACAAAAATAAAAATAGAGTCCCATTCTACATGTCAATATCAATA
CCGGCAACAATGAAATTTAAAGTAAAAGGAAAATCCGTCAACTTTAAAAATCGGGAGGGT
TCAAG


H17
>DC04
AGTGATAA--CTTT-CAAA--TTCAGA-GAAACCCTGGAATC--AAAAATGGGCAATCCT
-GAGCCAAATCCT-GTTTTACAAGAACAAACAAGGGTTCAGAAAGCGAAAAAAAAAAAAG
GGGGATAGGTGCAAAAACTCAACGGAAGCTGTTCTAAAAAATGGGGTTGACTGCCTTTTT
TGGTAAAAAAAGGAAAAAAAATCCTTCTATCGAATATCGAAACTCCATAAAGGATGAAGG
ATAAGCGTATATACCCTATGTATACACAATGAAAAACTATCTCAAAAATGACAACCGAAT
CCGTATTTTTTTTTATGAAAAAAAAAAAAATTGTTATGAATCAATTCCAAGTTGAAAAAA
AAATCGAATATTCTTTGATCAAATCATTCCCTCCATAGTCTGATCGATCTTTTCTTTTGA
AAAACTGATTAATCGGACAAAAATAAAAATAGAGTCCCATTCTACATGTCAATATCAATA
CCGGCAACAATGAAATTTAAAGTAAAAGGAAAATCCGTCAACTTTAAAAATCGGGAGGGT
TCAAG
>DC06
AGTGATAA--CTTT-CAAA--TTCAGA-GAAACCCTGGAATC--AAAAATGGGCAATCCT
-GAGCCAAATCCT-GTTTTACAAGAACAAACAAGGGTTCAGAAAGCGAAAAAAAAAAAAG
GGGGATAGGTGCAAAAACTCAACGGAAGCTGTTCTAAAAAATGGGGTTGACTGCCTTTTT
TGGTAAAAAAAGGAAAAAAAATCCTTCTATCGAATATCGAAACTCCATAAAGGATGAAGG
ATAAGCGTATATACCCTATGTATACACAATGAAAAACTATCTCAAAAATGACAACCGAAT
CCGTATTTTTTTTTATGAAAAAAAAAAAAATTGTTATGAATCAATTCCAAGTTGAAAAAA
AAATCGAATATTCTTTGATCAAATCATTCCCTCCATAGTCTGATCGATCTTTTCTTTTGA
AAAACTGATTAATCGGACAAAAATAAAAATAGAGTCCCATTCTACATGTCAATATCAATA
CCGGCAACAATGAAATTTAAAGTAAAAGGAAAATCCGTCAACTTTAAAAATCGGGAGGGT
TCAAG
>DC07
AGTGATAA--CTTT-CAAA--TTCAGA-GAAACCCTGGAATC--AAAAATGGGCAATCCT
-GAGCCAAATCCT-GTTTTACAAGAACAAACAAGGGTTCAGAAAGCGAAAAAAAAAAAAG
GGGGATAGGTGCAAAAACTCAACGGAAGCTGTTCTAAAAAATGGGGTTGACTGCCTTTTT
TGGTAAAAAAAGGAAAAAAAATCCTTCTATCGAATATCGAAACTCCATAAAGGATGAAGG
ATAAGCGTATATACCCTATGTATACACAATGAAAAACTATCTCAAAAATGACAACCGAAT
CCGTATTTTTTTTTATGAAAAAAAAAAAAATTGTTATGAATCAATTCCAAGTTGAAAAAA
AAATCGAATATTCTTTGATCAAATCATTCCCTCCATAGTCTGATCGATCTTTTCTTTTGA
AAAACTGATTAATCGGACAAAAATAAAAATAGAGTCCCATTCTACATGTCAATATCAATA
CCGGCAACAATGAAATTTAAAGTAAAAGGAAAATCCGTCAACTTTAAAAATCGGGAGGGT
TCAAG
>DC28
AGTGATAA--CTTT-CAAA--TTCAGA-GAAACCCTGGAATC--AAAAATGGGCAATCCT
-GAGCCAAATCCT-GTTTTACAAGAACAAACAAGGGTTCAGAAAGCGAAAAAAAAAAAAG
GGGGATAGGTGCAAAAACTCAACGGAAGCTGTTCTAAAAAATGGGGTTGACTGCCTTTTT
TGGTAAAAAAAGGAAAAAAAATCCTTCTATCGAATATCGAAACTCCATAAAGGATGAAGG
ATAAGCGTATATACCCTATGTATACACAATGAAAAACTATCTCAAAAATGACAACCGAAT
CCGTATTTTTTTTTATGAAAAAAAAAAAAATTGTTATGAATCAATTCCAAGTTGAAAAAA
AAATCGAATATTCTTTGATCAAATCATTCCCTCCATAGTCTGATCGATCTTTTCTTTTGA
AAAACTGATTAATCGGACAAAAATAAAAATAGAGTCCCATTCTACATGTCAATATCAATA
CCGGCAACAATGAAATTTAAAGTAAAAGGAAAATCCGTCAACTTTAAAAATCGGGAGGGT
TCAAG
>DC08
AGTGATAA--CTTT-CAAA--TTCAGA-GAAACCCTGGAATC--AAAAATGGGCAATCCT
-GAGCCAAATCCT-GTTTTACAAGAACAAACAAGGGTTCAGAAAGCGAAAAAAAAAAAAG
GGGGATAGGTGCAAAAACTCAACGGAAGCTGTTCTAAAAAATGGGGTTGACTGCCTTTTT
TGGTAAAAAAAGGAAAAAAAATCCTTCTATCGAATATCGAAACTCCATAAAGGATGAAGG
ATAAGCGTATATACCCTATGTATACACAATGAAAAACTATCTCAAAAATGACAACCGAAT
CCGTATTTTTTTTTATGAAAAAAAAAAAAATTGTTATGAATCAATTCCAAGTTGAAAAAA
AAATCGAATATTCTTTGATCAAATCATTCCCTCCATAGTCTGATCGATCTTTTCTTTTGA
AAAACTGATTAATCGGACAAAAATAAAAATAGAGTCCCATTCTACATGTCAATATCAATA
CCGGCAACAATGAAATTTAAAGTAAAAGGAAAATCCGTCAACTTTAAAAATCGGGAGGGT
TCAAG
>DC12
AGTGATAA--CTTT-CAAA--TTCAGA-GAAACCCTGGAATC--AAAAATGGGCAATCCT
-GAGCCAAATCCT-GTTTTACAAGAACAAACAAGGGTTCAGAAAGCGAAAAAAAAAAAAG
GGGGATAGGTGCAAAAACTCAACGGAAGCTGTTCTAAAAAATGGGGTTGACTGCCTTTTT
TGGTAAAAAAAGGAAAAAAAATCCTTCTATCGAATATCGAAACTCCATAAAGGATGAAGG
ATAAGCGTATATACCCTATGTATACACAATGAAAAACTATCTCAAAAATGACAACCGAAT
CCGTATTTTTTTTTATGAAAAAAAAAAAAATTGTTATGAATCAATTCCAAGTTGAAAAAA
AAATCGAATATTCTTTGATCAAATCATTCCCTCCATAGTCTGATCGATCTTTTCTTTTGA
AAAACTGATTAATCGGACAAAAATAAAAATAGAGTCCCATTCTACATGTCAATATCAATA
CCGGCAACAATGAAATTTAAAGTAAAAGGAAAATCCGTCAACTTTAAAAATCGGGAGGGT
TCAAG
>DC14
AGTGATAA--CTTT-CAAA--TTCAGA-GAAACCCTGGAATC--AAAAATGGGCAATCCT
-GAGCCAAATCCT-GTTTTACAAGAACAAACAAGGGTTCAGAAAGCGAAAAAAAAAAAAG
GGGGATAGGTGCAAAAACTCAACGGAAGCTGTTCTAAAAAATGGGGTTGACTGCCTTTTT
TGGTAAAAAAAGGAAAAAAAATCCTTCTATCGAATATCGAAACTCCATAAAGGATGAAGG
ATAAGCGTATATACCCTATGTATACACAATGAAAAACTATCTCAAAAATGACAACCGAAT
CCGTATTTTTTTTTATGAAAAAAAAAAAAATTGTTATGAATCAATTCCAAGTTGAAAAAA
AAATCGAATATTCTTTGATCAAATCATTCCCTCCATAGTCTGATCGATCTTTTCTTTTGA
AAAACTGATTAATCGGACAAAAATAAAAATAGAGTCCCATTCTACATGTCAATATCAATA
CCGGCAACAATGAAATTTAAAGTAAAAGGAAAATCCGTCAACTTTAAAAATCGGGAGGGT
TCAAG
>DC15
AGTGATAA--CTTT-CAAA--TTCAGA-GAAACCCTGGAATC--AAAAATGGGCAATCCT
-GAGCCAAATCCT-GTTTTACAAGAACAAACAAGGGTTCAGAAAGCGAAAAAAAAAAAAG
GGGGATAGGTGCAAAAACTCAACGGAAGCTGTTCTAAAAAATGGGGTTGACTGCCTTTTT
TGGTAAAAAAAGGAAAAAAAATCCTTCTATCGAATATCGAAACTCCATAAAGGATGAAGG
ATAAGCGTATATACCCTATGTATACACAATGAAAAACTATCTCAAAAATGACAACCGAAT
CCGTATTTTTTTTTATGAAAAAAAAAAAAATTGTTATGAATCAATTCCAAGTTGAAAAAA
AAATCGAATATTCTTTGATCAAATCATTCCCTCCATAGTCTGATCGATCTTTTCTTTTGA
AAAACTGATTAATCGGACAAAAATAAAAATAGAGTCCCATTCTACATGTCAATATCAATA
CCGGCAACAATGAAATTTAAAGTAAAAGGAAAATCCGTCAACTTTAAAAATCGGGAGGGT
TCAAG
>DC18
AGTGATAA--CTTT-CAAA--TTCAGA-GAAACCCTGGAATC--AAAAATGGGCAATCCT
-GAGCCAAATCCT-GTTTTACAAGAACAAACAAGGGTTCAGAAAGCGAAAAAAAAAAAAG
GGGGATAGGTGCAAAAACTCAACGGAAGCTGTTCTAAAAAATGGGGTTGACTGCCTTTTT
TGGTAAAAAAAGGAAAAAAAATCCTTCTATCGAATATCGAAACTCCATAAAGGATGAAGG
ATAAGCGTATATACCCTATGTATACACAATGAAAAACTATCTCAAAAATGACAACCGAAT
CCGTATTTTTTTTTATGAAAAAAAAAAAAATTGTTATGAATCAATTCCAAGTTGAAAAAA
AAATCGAATATTCTTTGATCAAATCATTCCCTCCATAGTCTGATCGATCTTTTCTTTTGA
AAAACTGATTAATCGGACAAAAATAAAAATAGAGTCCCATTCTACATGTCAATATCAATA
CCGGCAACAATGAAATTTAAAGTAAAAGGAAAATCCGTCAACTTTAAAAATCGGGAGGGT
TCAAG
>DC25
AGTGATAA--CTTT-CAAA--TTCAGA-GAAACCCTGGAATC--AAAAATGGGCAATCCT
-GAGCCAAATCCT-GTTTTACAAGAACAAACAAGGGTTCAGAAAGCGAAAAAAAAAAAAG
GGGGATAGGTGCAAAAACTCAACGGAAGCTGTTCTAAAAAATGGGGTTGACTGCCTTTTT
TGGTAAAAAAAGGAAAAAAAATCCTTCTATCGAATATCGAAACTCCATAAAGGATGAAGG
ATAAGCGTATATACCCTATGTATACACAATGAAAAACTATCTCAAAAATGACAACCGAAT
CCGTATTTTTTTTTATGAAAAAAAAAAAAATTGTTATGAATCAATTCCAAGTTGAAAAAA
AAATCGAATATTCTTTGATCAAATCATTCCCTCCATAGTCTGATCGATCTTTTCTTTTGA
AAAACTGATTAATCGGACAAAAATAAAAATAGAGTCCCATTCTACATGTCAATATCAATA
CCGGCAACAATGAAATTTAAAGTAAAAGGAAAATCCGTCAACTTTAAAAATCGGGAGGGT
TCAAG
>DC26
AGTGATAA--CTTT-CAAA--TTCAGA-GAAACCCTGGAATC--AAAAATGGGCAATCCT
-GAGCCAAATCCT-GTTTTACAAGAACAAACAAGGGTTCAGAAAGCGAAAAAAAAAAAAG
GGGGATAGGTGCAAAAACTCAACGGAAGCTGTTCTAAAAAATGGGGTTGACTGCCTTTTT
TGGTAAAAAAAGGAAAAAAAATCCTTCTATCGAATATCGAAACTCCATAAAGGATGAAGG
ATAAGCGTATATACCCTATGTATACACAATGAAAAACTATCTCAAAAATGACAACCGAAT
CCGTATTTTTTTTTATGAAAAAAAAAAAAATTGTTATGAATCAATTCCAAGTTGAAAAAA
AAATCGAATATTCTTTGATCAAATCATTCCCTCCATAGTCTGATCGATCTTTTCTTTTGA
AAAACTGATTAATCGGACAAAAATAAAAATAGAGTCCCATTCTACATGTCAATATCAATA
CCGGCAACAATGAAATTTAAAGTAAAAGGAAAATCCGTCAACTTTAAAAATCGGGAGGGT
TCAAG


H18
>WM09
AGTGATAA--CTTT-CAAA--TTCAGA-GAAACCCTGGAATC--AAAAATGGGCAATCCT
-GAGCCAAATCCT-GTTTTACAAGAACAAACAAGGGTTCAGAAAGCGAAAAAAAAAAA-G
GGGGATAGGTGCAGAGACTCAACGGAAGCTGTTCTAAAAAATGGGGTTGACTGCCTTTTT
TGGTAAAGAAAGGAAAAAAAATCCTTCTATCGAATATCGAAACTCCATAAAGGATGAAGG
ATAAGCGTATATACACTATGTATACACAATGAAAAACTATCTCAAAAATGACAACCGAAT
CCGTATTTTTTTTTATGAAAAAAAAAAAAATTGTTATGAATCAATTCCAAGTTGAAAAAA
AAATCGAATATTCATTGATCAAATCATTCACTCCATAGTCTGATCGATCTTTTCTTTTGA
AAAACTGATTAATCGGACAAAAATAAAGATAGAGTCCCATTCTACATGTCAATATCAATA
CCGGCAACAATGAAATTTAAAGTAAAAGGAAAATCCGTCGACTTTAAAAATCGTGAGGGT
TCAAG
>WM17
AGTGATAA--CTTT-CAAA--TTCAGA-GAAACCCTGGAATC--AAAAATGGGCAATCCT
-GAGCCAAATCCT-GTTTTACAAGAACAAACAAGGGTTCAGAAAGCGAAAAAAAAAAA-G
GGGGATAGGTGCAGAGACTCAACGGAAGCTGTTCTAAAAAATGGGGTTGACTGCCTTTTT
TGGTAAAGAAAGGAAAAAAAATCCTTCTATCGAATATCGAAACTCCATAAAGGATGAAGG
ATAAGCGTATATACACTATGTATACACAATGAAAAACTATCTCAAAAATGACAACCGAAT
CCGTATTTTTTTTTATGAAAAAAAAAAAAATTGTTATGAATCAATTCCAAGTTGAAAAAA
AAATCGAATATTCATTGATCAAATCATTCACTCCATAGTCTGATCGATCTTTTCTTTTGA
AAAACTGATTAATCGGACAAAAATAAAGATAGAGTCCCATTCTACATGTCAATATCAATA
CCGGCAACAATGAAATTTAAAGTAAAAGGAAAATCCGTCGACTTTAAAAATCGTGAGGGT
TCAAG
>CH10
AGTGATAA--CTTT-CAAA--TTCAGA-GAAACCCTGGAATC--AAAAATGGGCAATCCT
-GAGCCAAATCCT-GTTTTACAAGAACAAACAAGGGTTCAGAAAGCGAAAAAAAAAAA-G
GGGGATAGGTGCAGAGACTCAACGGAAGCTGTTCTAAAAAATGGGGTTGACTGCCTTTTT
TGGTAAAGAAAGGAAAAAAAATCCTTCTATCGAATATCGAAACTCCATAAAGGATGAAGG
ATAAGCGTATATACACTATGTATACACAATGAAAAACTATCTCAAAAATGACAACCGAAT
CCGTATTTTTTTTTATGAAAAAAAAAAAAATTGTTATGAATCAATTCCAAGTTGAAAAAA
AAATCGAATATTCATTGATCAAATCATTCACTCCATAGTCTGATCGATCTTTTCTTTTGA
AAAACTGATTAATCGGACAAAAATAAAGATAGAGTCCCATTCTACATGTCAATATCAATA
CCGGCAACAATGAAATTTAAAGTAAAAGGAAAATCCGTCGACTTTAAAAATCGTGAGGGT
TCAAG


H19
>DC09
AGTGATAA--CTTT-CAAA--TTCAGA-GAAACCCTGGAATC--AAAAATGGGCAATCCT
-GAGCCAAATCCT-GTTTTACAAGAACAAACAAGGGTTCAGAAAGCGAAAAAAAAAAAAG
GGGGATAGGTGCAAAAACTCAACGGAAGCTGTTCTAAAAAATGGGGTTGACTGCCTTTTT
TGGTAAAAAAAGGAAAAAAAATCCTTCTATCGAATATCGAAACTCCATAAAGGATGAAGG
ATAAGCGTATATACACTATGTATACACAATGAAAAACTATCTCAAAAATGACAACCGAAT
CCGTATTTTTTTTTATGAAAAAAAAAAAAATTGTTATGAATCAATTCCAAGTTGAAAAAA
AAATCGAATATTCATTGATCAAATCATTCACTCCATAGTCTGATCGATCTTTTCTTTTGA
AAAACTGATTAATCGGACAAAAATAAAAATAGAGTCCCATTCTACATGTCAATATCAATA
CCGGCAACAATGAAATTTAAAGTAAAAGGAAAATCCGTCAACTTTAAAAATCGGGAGGGT
TCAAG
>XY10
AGTGATAA--CTTT-CAAA--TTCAGA-GAAACCCTGGAATC--AAAAATGGGCAATCCT
-GAGCCAAATCCT-GTTTTACAAGAACAAACAAGGGTTCAGAAAGCGAAAAAAAAAAAAG
GGGGATAGGTGCAAAAACTCAACGGAAGCTGTTCTAAAAAATGGGGTTGACTGCCTTTTT
TGGTAAAAAAAGGAAAAAAAATCCTTCTATCGAATATCGAAACTCCATAAAGGATGAAGG
ATAAGCGTATATACACTATGTATACACAATGAAAAACTATCTCAAAAATGACAACCGAAT
CCGTATTTTTTTTTATGAAAAAAAAAAAAATTGTTATGAATCAATTCCAAGTTGAAAAAA
AAATCGAATATTCATTGATCAAATCATTCACTCCATAGTCTGATCGATCTTTTCTTTTGA
AAAACTGATTAATCGGACAAAAATAAAAATAGAGTCCCATTCTACATGTCAATATCAATA
CCGGCAACAATGAAATTTAAAGTAAAAGGAAAATCCGTCAACTTTAAAAATCGGGAGGGT
TCAAG


H20
>WM14
AGTGATAA--CTTT-CAAA--TTCAGA-GAAACCCTGGAATC--AAAAATGGGCAATCCT
-GAGCCAAATCCT-GTTTTACAAGAACAAACAAGGGTTCAGAAAGCGAAAAAAAAA-AAG
GGGGATAGGTGCAAAAACTCAACGGAAGCTGTTCTAAAAAATGGGGTTGACTGCCTTTTT
TGGTAAAAAAAGGAAAAAAAATCCTTCTATCGAATATCGAAACTCCATAAAGGATGAAGG
ATAAGCGTATATACACTATGTATACACAATGAAAAACTATCTCAAAAATGACAACCGAAT
CCGTATTTTTTTTTATGAAAAAAAAAAAAATTGTTATGAATCAATTCCAAGTTGAAAAAA
AAATCGAATATTCATTGATCAAATCATTCACTCCATAGTCTGATCGATCTTTTCTTTTGA
AAAACTGATTAATCGGACAAAAATAAAGATAGAGTCCCATTCTACATGTCAATATCAATA
CCGGCAACAATGAAATTTAAAGTAAAAGGAAAATCCGTCGACTTTAAAAATCGTGAGGGT
TCAAG
>WM28
AGTGATAA--CTTT-CAAA--TTCAGA-GAAACCCTGGAATC--AAAAATGGGCAATCCT
-GAGCCAAATCCT-GTTTTACAAGAACAAACAAGGGTTCAGAAAGCGAAAAAAAAA-AAG
GGGGATAGGTGCAAAAACTCAACGGAAGCTGTTCTAAAAAATGGGGTTGACTGCCTTTTT
TGGTAAAAAAAGGAAAAAAAATCCTTCTATCGAATATCGAAACTCCATAAAGGATGAAGG
ATAAGCGTATATACACTATGTATACACAATGAAAAACTATCTCAAAAATGACAACCGAAT
CCGTATTTTTTTTTATGAAAAAAAAAAAAATTGTTATGAATCAATTCCAAGTTGAAAAAA
AAATCGAATATTCATTGATCAAATCATTCACTCCATAGTCTGATCGATCTTTTCTTTTGA
AAAACTGATTAATCGGACAAAAATAAAGATAGAGTCCCATTCTACATGTCAATATCAATA
CCGGCAACAATGAAATTTAAAGTAAAAGGAAAATCCGTCGACTTTAAAAATCGTGAGGGT
TCAAG


H21
>DC11
AGTGATAA--CTTT-CAAA--TTCAGA-GAAACCCTGGAATC--AAAAATGGGCAATCCT
-GAGCCAAATCCT-GTTTTACAAGAACAAACAAGGGTTCAGAAAGCGAAAAAAAAAAAAG
GGGGATAGGTGCAAAAACTCAACGGAAGCTGTTCTAAAAAATGGGGTTGACTGCCTTTTT
TGGTAAAAAAAGGAAAAAAAATCCTTCTATCGAATATCGAAACTCCATAAAGGATGAAGG
ATAAGCGTATATACCCTATGTATACACAATGAAAAACTATCTCAAAAATGACAACCGAAT
CCGTATTTTTTTTTATGAAAAAAAAAAAAATTGTTATGAATCAATTCCAAGTTGAAAAAA
AAATCAAATATTCTTTGATCAAATCATTCCCTCCATAGTCTGATCGATCTTTTCTTTTGA
AAAACTGATTAATCGGACAAAAATAAAAATAGAGTCCCATTCTACATGTCAATATCAATA
CCGGCAACAATGAAATTTAAAGTAAAAGGAAAATCCGTCAACTTTAAAAATCGGGAGGGT
TCAAG
>DC20
AGTGATAA--CTTT-CAAA--TTCAGA-GAAACCCTGGAATC--AAAAATGGGCAATCCT
-GAGCCAAATCCT-GTTTTACAAGAACAAACAAGGGTTCAGAAAGCGAAAAAAAAAAAAG
GGGGATAGGTGCAAAAACTCAACGGAAGCTGTTCTAAAAAATGGGGTTGACTGCCTTTTT
TGGTAAAAAAAGGAAAAAAAATCCTTCTATCGAATATCGAAACTCCATAAAGGATGAAGG
ATAAGCGTATATACCCTATGTATACACAATGAAAAACTATCTCAAAAATGACAACCGAAT
CCGTATTTTTTTTTATGAAAAAAAAAAAAATTGTTATGAATCAATTCCAAGTTGAAAAAA
AAATCAAATATTCTTTGATCAAATCATTCCCTCCATAGTCTGATCGATCTTTTCTTTTGA
AAAACTGATTAATCGGACAAAAATAAAAATAGAGTCCCATTCTACATGTCAATATCAATA
CCGGCAACAATGAAATTTAAAGTAAAAGGAAAATCCGTCAACTTTAAAAATCGGGAGGGT
TCAAG
>DC23
AGTGATAA--CTTT-CAAA--TTCAGA-GAAACCCTGGAATC--AAAAATGGGCAATCCT
-GAGCCAAATCCT-GTTTTACAAGAACAAACAAGGGTTCAGAAAGCGAAAAAAAAAAAAG
GGGGATAGGTGCAAAAACTCAACGGAAGCTGTTCTAAAAAATGGGGTTGACTGCCTTTTT
TGGTAAAAAAAGGAAAAAAAATCCTTCTATCGAATATCGAAACTCCATAAAGGATGAAGG
ATAAGCGTATATACCCTATGTATACACAATGAAAAACTATCTCAAAAATGACAACCGAAT
CCGTATTTTTTTTTATGAAAAAAAAAAAAATTGTTATGAATCAATTCCAAGTTGAAAAAA
AAATCAAATATTCTTTGATCAAATCATTCCCTCCATAGTCTGATCGATCTTTTCTTTTGA
AAAACTGATTAATCGGACAAAAATAAAAATAGAGTCCCATTCTACATGTCAATATCAATA
CCGGCAACAATGAAATTTAAAGTAAAAGGAAAATCCGTCAACTTTAAAAATCGGGAGGGT
TCAAG


H22
>DC13
AGTGATAA--CTTT-CAAA--TTCAGA-GAAACCCTGGAATC--AAAAATGGGCAATCCT
-GAGCCAAATCCT-GTTTTACAAGAACAAACAAGGGTTCAGAAAGCGAAAAAAAAAAAAG
GGGGATAGGTGCAAAAACTCAACGGAAGCTGTTCTAAAAAATGGGGTTGACTGCCTTTTT
TGGTAAAAAAAGGAAAAAAAATCCTTCTATCGAATATCGAAACTCCATAAAGGATGAAGG
ATAAGCGTATATACACTATGTATACACAATGAAAAACTATCTCAAAAATGACAACCGAAT
CCGTATTTTTTTTTATGAAAAAAAAAAAAATTGTTATGAATCAATTCCAAGTTGAAAAAA
AAATCGAATATTCTTTGATCAAATCATTCCCTCCATAGTCTGATCGATCTTTTCTTTTGA
AAAACTGATTAATCGGACAAAAATAAAAATAGAGTCCCATTCTACATGTCAATATCAATA
CCGGCAACAATGAAATTTAAAGTAAAAGGAAAATCCGTCAACTTTAAAAATCGTGAGGGT
TCAAG
>DC21
AGTGATAA--CTTT-CAAA--TTCAGA-GAAACCCTGGAATC--AAAAATGGGCAATCCT
-GAGCCAAATCCT-GTTTTACAAGAACAAACAAGGGTTCAGAAAGCGAAAAAAAAAAAAG
GGGGATAGGTGCAAAAACTCAACGGAAGCTGTTCTAAAAAATGGGGTTGACTGCCTTTTT
TGGTAAAAAAAGGAAAAAAAATCCTTCTATCGAATATCGAAACTCCATAAAGGATGAAGG
ATAAGCGTATATACACTATGTATACACAATGAAAAACTATCTCAAAAATGACAACCGAAT
CCGTATTTTTTTTTATGAAAAAAAAAAAAATTGTTATGAATCAATTCCAAGTTGAAAAAA
AAATCGAATATTCTTTGATCAAATCATTCCCTCCATAGTCTGATCGATCTTTTCTTTTGA
AAAACTGATTAATCGGACAAAAATAAAAATAGAGTCCCATTCTACATGTCAATATCAATA
CCGGCAACAATGAAATTTAAAGTAAAAGGAAAATCCGTCAACTTTAAAAATCGTGAGGGT
TCAAG


H23
>WM15
AGTGATAA--CTTT-CAA---TTCAGA-GAAACCCTGGAATC--AAAAATGGGCAATCCT
-GAGCCAAATCCT-GTTTTACAAGAACAAACAAGGGTTCAGAAAGCGAAAAAAAAA-AAG
GGGGATAGGTGCAGAGACTCAACGGAAGCTGTTCTAAAAAATGGGGTTGACTGCCTTTTT
TGGTAAAGAAAGGAAAAGAAATCCTTCTATCGAATATCGAAACTCCATAAAGGATGAAGG
ATAAGCGTATATACACTATGTATACACAATGAAAAACTATCTCAAAAATGACAACCGAAT
CCGTATTTTTTTTTATGAAAAAAAAAAAAATTGTTATGAATCAATTCCAAGTTGAAAAAA
AAATCGAATATTCATTGATCAAATCATTCACTCCATAGTCTGATCGATCTTTTCTTTTGA
AAAACTGATTAATCGGACAAAAATAAAGATAGAGTCCCATTCTACATGTCAATATCAATA
CCGGCAACAATGAAATTTAAAGTAAGAGGAAAATCCGTCGACTTTAAAAATCGTGAGGGT
TCAAG
>TL17
AGTGATAA--CTTT-CAA---TTCAGA-GAAACCCTGGAATC--AAAAATGGGCAATCCT
-GAGCCAAATCCT-GTTTTACAAGAACAAACAAGGGTTCAGAAAGCGAAAAAAAAA-AAG
GGGGATAGGTGCAGAGACTCAACGGAAGCTGTTCTAAAAAATGGGGTTGACTGCCTTTTT
TGGTAAAGAAAGGAAAAGAAATCCTTCTATCGAATATCGAAACTCCATAAAGGATGAAGG
ATAAGCGTATATACACTATGTATACACAATGAAAAACTATCTCAAAAATGACAACCGAAT
CCGTATTTTTTTTTATGAAAAAAAAAAAAATTGTTATGAATCAATTCCAAGTTGAAAAAA
AAATCGAATATTCATTGATCAAATCATTCACTCCATAGTCTGATCGATCTTTTCTTTTGA
AAAACTGATTAATCGGACAAAAATAAAGATAGAGTCCCATTCTACATGTCAATATCAATA
CCGGCAACAATGAAATTTAAAGTAAGAGGAAAATCCGTCGACTTTAAAAATCGTGAGGGT
TCAAG


H24
>WM26
AGTGATAA--CTTT-CAAA--TTCAGA-GAAACCCTGGAATC--AAAAATGGGCAATCCT
-GAGCCAAATCCT-GTTTTACAAGAACAAACAAGGGTTCAGAAAGCGAAAAAAAAA-AAG
GGGGATAGGTGCAGAGACTCAACGGAAGCTGTTCTAAAAAATGGGGTTGACTGCCTTTTT
TGGTAAAGAAAGGAAAAAAAATCCTTCTATCGAATATCGAAACTCCATAAAGGATGAAGG
ATAAGCGTATATACACTATGTATACACAATGAAAAACTATCTCAAAAATGACAACCGAAT
CCGTATTTTTTTTTATGAAAAAAAAAAAAATTGTTATGAATCAATTCCAAGTTGAAAAAA
GAATCGAATATTCATTGATCAAATCATTCACTCCATAGTCTGATCGATCTTTTCTTTTGA
AAAACTGATTAATCGGACAAAAATAAAGATAGAGTCCCATTCTACATGTCAATATCAATA
CCGGCAACAATGAAATTTAAAGTAAAAGGAAAATCCGTCGACTTTAAAAATCGTGAGGGT
TCAAG
>TL18
AGTGATAA--CTTT-CAAA--TTCAGA-GAAACCCTGGAATC--AAAAATGGGCAATCCT
-GAGCCAAATCCT-GTTTTACAAGAACAAACAAGGGTTCAGAAAGCGAAAAAAAAA-AAG
GGGGATAGGTGCAGAGACTCAACGGAAGCTGTTCTAAAAAATGGGGTTGACTGCCTTTTT
TGGTAAAGAAAGGAAAAAAAATCCTTCTATCGAATATCGAAACTCCATAAAGGATGAAGG
ATAAGCGTATATACACTATGTATACACAATGAAAAACTATCTCAAAAATGACAACCGAAT
CCGTATTTTTTTTTATGAAAAAAAAAAAAATTGTTATGAATCAATTCCAAGTTGAAAAAA
GAATCGAATATTCATTGATCAAATCATTCACTCCATAGTCTGATCGATCTTTTCTTTTGA
AAAACTGATTAATCGGACAAAAATAAAGATAGAGTCCCATTCTACATGTCAATATCAATA
CCGGCAACAATGAAATTTAAAGTAAAAGGAAAATCCGTCGACTTTAAAAATCGTGAGGGT
TCAAG
>CH15
AGTGATAA--CTTT-CAAA--TTCAGA-GAAACCCTGGAATC--AAAAATGGGCAATCCT
-GAGCCAAATCCT-GTTTTACAAGAACAAACAAGGGTTCAGAAAGCGAAAAAAAAA-AAG
GGGGATAGGTGCAGAGACTCAACGGAAGCTGTTCTAAAAAATGGGGTTGACTGCCTTTTT
TGGTAAAGAAAGGAAAAAAAATCCTTCTATCGAATATCGAAACTCCATAAAGGATGAAGG
ATAAGCGTATATACACTATGTATACACAATGAAAAACTATCTCAAAAATGACAACCGAAT
CCGTATTTTTTTTTATGAAAAAAAAAAAAATTGTTATGAATCAATTCCAAGTTGAAAAAA
GAATCGAATATTCATTGATCAAATCATTCACTCCATAGTCTGATCGATCTTTTCTTTTGA
AAAACTGATTAATCGGACAAAAATAAAGATAGAGTCCCATTCTACATGTCAATATCAATA
CCGGCAACAATGAAATTTAAAGTAAAAGGAAAATCCGTCGACTTTAAAAATCGTGAGGGT
TCAAG
>CH21
AGTGATAA--CTTT-CAAA--TTCAGA-GAAACCCTGGAATC--AAAAATGGGCAATCCT
-GAGCCAAATCCT-GTTTTACAAGAACAAACAAGGGTTCAGAAAGCGAAAAAAAAA-AAG
GGGGATAGGTGCAGAGACTCAACGGAAGCTGTTCTAAAAAATGGGGTTGACTGCCTTTTT
TGGTAAAGAAAGGAAAAAAAATCCTTCTATCGAATATCGAAACTCCATAAAGGATGAAGG
ATAAGCGTATATACACTATGTATACACAATGAAAAACTATCTCAAAAATGACAACCGAAT
CCGTATTTTTTTTTATGAAAAAAAAAAAAATTGTTATGAATCAATTCCAAGTTGAAAAAA
GAATCGAATATTCATTGATCAAATCATTCACTCCATAGTCTGATCGATCTTTTCTTTTGA
AAAACTGATTAATCGGACAAAAATAAAGATAGAGTCCCATTCTACATGTCAATATCAATA
CCGGCAACAATGAAATTTAAAGTAAAAGGAAAATCCGTCGACTTTAAAAATCGTGAGGGT
TCAAG


H25
>DC19
AGTGATAA--CTTT-CAAA--TTCAGA-GAAACCCTGGAATC--AAAAATGGGCAATCCT
-GAGCCAAATCCT-GTTTTACAAGAACAAACAAGGGTTCAGAAAGCGAAAAAAAAAAAAG
GGGGATAGGGGCAAAAACTCAACGGAAGCTGTTCTAAAAAAGGGGGTTGACTGCCTTTTT
TGGTAAAAAAAGGAAAAAAAATCCTTCTATCGAATATCGAAACTCCATAAAGGATGAAGG
ATAAGCGTATATACACTATGTATACACAATGAAAAACTATCTCAAAAATGACAACCGAAT
CCGTATTTTTTTTTATGAAAAAAAAAAAAATTGTTATGAATCAATTCCAAGTTGAAAAAA
AAATCGAATATTCTTTGATCAAATCATTCCCTCCATAGTCTGATCGATCTTTTCTTTTGA
AAAACTGATTAATCGGACAAAAATAAAAATAGAGTCCCATTCTACATGTCAATATCAATA
CCGGCAACAATGAAATTTAAAGTAAAAGGAAAATCCGTCAACTTTAAAAATCGGGAGGGT
TCAAG
>HD04
AGTGATAA--CTTT-CAAA--TTCAGA-GAAACCCTGGAATC--AAAAATGGGCAATCCT
-GAGCCAAATCCT-GTTTTACAAGAACAAACAAGGGTTCAGAAAGCGAAAAAAAAAAAAG
GGGGATAGGGGCAAAAACTCAACGGAAGCTGTTCTAAAAAAGGGGGTTGACTGCCTTTTT
TGGTAAAAAAAGGAAAAAAAATCCTTCTATCGAATATCGAAACTCCATAAAGGATGAAGG
ATAAGCGTATATACACTATGTATACACAATGAAAAACTATCTCAAAAATGACAACCGAAT
CCGTATTTTTTTTTATGAAAAAAAAAAAAATTGTTATGAATCAATTCCAAGTTGAAAAAA
AAATCGAATATTCTTTGATCAAATCATTCCCTCCATAGTCTGATCGATCTTTTCTTTTGA
AAAACTGATTAATCGGACAAAAATAAAAATAGAGTCCCATTCTACATGTCAATATCAATA
CCGGCAACAATGAAATTTAAAGTAAAAGGAAAATCCGTCAACTTTAAAAATCGGGAGGGT
TCAAG


H26
>WM29
AGTGATAA--CTTT-CAAA--TTCAGA-GAAACCCTGGAATC--AAAAATGGGCAATCCT
-GAGCCAAATCCT-GTTTTACAAGAACAAACAAGGGTTCAGAAAGCGAAAAAAAAAAA-G
GGGGATAGGTGCAGAAACTCAACGGAAGCTGTTCTAAAAAATGGGGTTGACTGCCTTTTT
TGGTAAAGAAAGGAAAAGAAATCCTTCTATCGAATATCGAAACTCCATAAAGGATGAAGG
ATAAGCGTATATACACTATGTATACACAATGAAAAACTATCTCAAAAATGACAACCGAAT
CCGTATTTTTTTTTATGAAAAAAAAAAAAATTGTTATGAATCAATTCCAAGTTGAAAAAA
GAATCGAATATTCATTGATCAAATCATTCACTCCATAGTCTGATCGATCTTTTCTTTTGA
AAAACTGATTAATCGGACAAAAATAAAGATAGAGTCCCATTCTACATGTCAATATCAATA
CCGGCAACAATGAAATTTAAAGTAAAAGGAAAATCCGTCGACTTTAAAAATCGTGAGGGT
TCAAG
>TL19
AGTGATAA--CTTT-CAAA--TTCAGA-GAAACCCTGGAATC--AAAAATGGGCAATCCT
-GAGCCAAATCCT-GTTTTACAAGAACAAACAAGGGTTCAGAAAGCGAAAAAAAAAAA-G
GGGGATAGGTGCAGAAACTCAACGGAAGCTGTTCTAAAAAATGGGGTTGACTGCCTTTTT
TGGTAAAGAAAGGAAAAGAAATCCTTCTATCGAATATCGAAACTCCATAAAGGATGAAGG
ATAAGCGTATATACACTATGTATACACAATGAAAAACTATCTCAAAAATGACAACCGAAT
CCGTATTTTTTTTTATGAAAAAAAAAAAAATTGTTATGAATCAATTCCAAGTTGAAAAAA
GAATCGAATATTCATTGATCAAATCATTCACTCCATAGTCTGATCGATCTTTTCTTTTGA
AAAACTGATTAATCGGACAAAAATAAAGATAGAGTCCCATTCTACATGTCAATATCAATA
CCGGCAACAATGAAATTTAAAGTAAAAGGAAAATCCGTCGACTTTAAAAATCGTGAGGGT
TCAAG


H27
>YR16
AGTGATAA--CTTT-CAAA--TTCAGA-GAAACCCTGGAATC--AAAAATGGGCAATCCT
-GAGCCAAATCCT-GTTTTACAAGAACAAACAAGGGTTCAGAAAGCGAAAAAAAAAAA-G
GGGGATAGGTGCAGAGACTCAACGGAAGCTGTTCTAAAAAATGGGGTTGACTGCCTTTTT
TGGTAAAGAAAGGAAAAGAAATCCTTCTATCGAATATCGAAACTCCATAAAGGATGAAGG
ATAAGCGTATATACACTATGTATACACAATGAAAAACTATCTCAAAAATGACAACCGAAT
CCGTATTTTTTTTTATGAAAAAAAAAAGAATTGTTATGAATCAATTCCAAGTTGAAAAAA
GAATCGAATATTCATTGATCAAATCATTCACTCCATAGTCTGATCGATCTTTTCTTTTGA
AAAACTGATTAATCGGACAAGAATAAAGATAGAGTCCCATTCTACATGTCAATATCAATA
CCGGCAACAATGAAATTTAAAGTAAGAGGAAAATCCGTCGACTTTAAAAATCGTGAGGGT
TCAAG
>YF16
AGTGATAA--CTTT-CAAA--TTCAGA-GAAACCCTGGAATC--AAAAATGGGCAATCCT
-GAGCCAAATCCT-GTTTTACAAGAACAAACAAGGGTTCAGAAAGCGAAAAAAAAAAA-G
GGGGATAGGTGCAGAGACTCAACGGAAGCTGTTCTAAAAAATGGGGTTGACTGCCTTTTT
TGGTAAAGAAAGGAAAAGAAATCCTTCTATCGAATATCGAAACTCCATAAAGGATGAAGG
ATAAGCGTATATACACTATGTATACACAATGAAAAACTATCTCAAAAATGACAACCGAAT
CCGTATTTTTTTTTATGAAAAAAAAAAGAATTGTTATGAATCAATTCCAAGTTGAAAAAA
GAATCGAATATTCATTGATCAAATCATTCACTCCATAGTCTGATCGATCTTTTCTTTTGA
AAAACTGATTAATCGGACAAGAATAAAGATAGAGTCCCATTCTACATGTCAATATCAATA
CCGGCAACAATGAAATTTAAAGTAAGAGGAAAATCCGTCGACTTTAAAAATCGTGAGGGT
TCAAG


H28
>DC27
AGTGATAA--CTTT-CAAA--TTCAGA-GAAACCCTGGAATC--AAAAATGGGCAATCCT
-GAGCCAAATCCT-GTTTTACAAGAACAAACAAGGGTTCAGAAAGCGAAAAAAAAAAAAG
GGGGATAGGGGCAAAAACTCAACGGAAGCTGTTCTAAAAAAGGGGGTTGACTGCCTTTTT
TGGTAAAAAAAGGAAAAAAAATCCTTCTATCGAATATCGAAACTCCATAAAGGATGAAGG
ATAAGCGTATATACCCTATGTATACACAATGAAAAACTATCTCAAAAATGACAACCGAAT
CCGTATTTTTTTTTATGAAAAAAAAAAAAATTGTTATGAATCAATTCCAAGTTGAAAAAA
AAATCAAATATTCTTTGATCAAATCATTCCCTCCATAGTCTGATCGATCTTTTCTTTTGA
AAAACTGATTAATCGGACAAAAATAAAAATAGAGTCCCATTCTACATGTCAATATCAATA
CCGGCAACAATGAAATTTAAAGTAAAAGGAAAATCCGTCAACTTTAAAAATCGGGAGGGT
TCAAG
>HD07
AGTGATAA--CTTT-CAAA--TTCAGA-GAAACCCTGGAATC--AAAAATGGGCAATCCT
-GAGCCAAATCCT-GTTTTACAAGAACAAACAAGGGTTCAGAAAGCGAAAAAAAAAAAAG
GGGGATAGGGGCAAAAACTCAACGGAAGCTGTTCTAAAAAAGGGGGTTGACTGCCTTTTT
TGGTAAAAAAAGGAAAAAAAATCCTTCTATCGAATATCGAAACTCCATAAAGGATGAAGG
ATAAGCGTATATACCCTATGTATACACAATGAAAAACTATCTCAAAAATGACAACCGAAT
CCGTATTTTTTTTTATGAAAAAAAAAAAAATTGTTATGAATCAATTCCAAGTTGAAAAAA
AAATCAAATATTCTTTGATCAAATCATTCCCTCCATAGTCTGATCGATCTTTTCTTTTGA
AAAACTGATTAATCGGACAAAAATAAAAATAGAGTCCCATTCTACATGTCAATATCAATA
CCGGCAACAATGAAATTTAAAGTAAAAGGAAAATCCGTCAACTTTAAAAATCGGGAGGGT
TCAAG


H29
>YR17
AGTGATAA--CTTT-CAAA--TTCAGAAGAAACCCTGGAATC--AAAAATGGGCAATCCT
-GAGCCAAATCCTAGTTTTACAAGAACAAACAAGGGTTCAGAAAGCGAAAAAAAAAAA-G
GGGGATAGGTGCAGAGACTCAACGGAAGCTGTTCTAAGAAATGGGGTTGACTGCCTTTTT
TGGTAAAGAAAGGAAAAGAAATCCTTCTATCGAATATCGAAACTCCATAAAGGATGAAGG
ATAAGCGTATATACACTATGTATACACAATGAAAAACTATCTCAAAAATGACAACCGAAT
CCGTATTTTTTTTTATGAAAAAAAAAAAAATTGTTATGAATCAATTCCAAGTTGAAAAAA
GAATCGAATATTCATTGATCAAATCATTCACTCCATAGTCTGATCGATCTTTTCTTTTGA
AAAACTGATTAATCGGACAAGAATAAAGATAGAGTCCCATTCTACATGTCAATATCAATA
CCGGCAACAATGAAATTTAAAGTAAGAGGAAAATCCGTCGACTTTAAAAATCGTGAGGGT
TCAAG
>YR26
AGTGATAA--CTTT-CAAA--TTCAGAAGAAACCCTGGAATC--AAAAATGGGCAATCCT
-GAGCCAAATCCTAGTTTTACAAGAACAAACAAGGGTTCAGAAAGCGAAAAAAAAAAA-G
GGGGATAGGTGCAGAGACTCAACGGAAGCTGTTCTAAGAAATGGGGTTGACTGCCTTTTT
TGGTAAAGAAAGGAAAAGAAATCCTTCTATCGAATATCGAAACTCCATAAAGGATGAAGG
ATAAGCGTATATACACTATGTATACACAATGAAAAACTATCTCAAAAATGACAACCGAAT
CCGTATTTTTTTTTATGAAAAAAAAAAAAATTGTTATGAATCAATTCCAAGTTGAAAAAA
GAATCGAATATTCATTGATCAAATCATTCACTCCATAGTCTGATCGATCTTTTCTTTTGA
AAAACTGATTAATCGGACAAGAATAAAGATAGAGTCCCATTCTACATGTCAATATCAATA
CCGGCAACAATGAAATTTAAAGTAAGAGGAAAATCCGTCGACTTTAAAAATCGTGAGGGT
TCAAG
>YR27
AGTGATAA--CTTT-CAAA--TTCAGAAGAAACCCTGGAATC--AAAAATGGGCAATCCT
-GAGCCAAATCCTAGTTTTACAAGAACAAACAAGGGTTCAGAAAGCGAAAAAAAAAAA-G
GGGGATAGGTGCAGAGACTCAACGGAAGCTGTTCTAAGAAATGGGGTTGACTGCCTTTTT
TGGTAAAGAAAGGAAAAGAAATCCTTCTATCGAATATCGAAACTCCATAAAGGATGAAGG
ATAAGCGTATATACACTATGTATACACAATGAAAAACTATCTCAAAAATGACAACCGAAT
CCGTATTTTTTTTTATGAAAAAAAAAAAAATTGTTATGAATCAATTCCAAGTTGAAAAAA
GAATCGAATATTCATTGATCAAATCATTCACTCCATAGTCTGATCGATCTTTTCTTTTGA
AAAACTGATTAATCGGACAAGAATAAAGATAGAGTCCCATTCTACATGTCAATATCAATA
CCGGCAACAATGAAATTTAAAGTAAGAGGAAAATCCGTCGACTTTAAAAATCGTGAGGGT
TCAAG
>BS09
AGTGATAA--CTTT-CAAA--TTCAGAAGAAACCCTGGAATC--AAAAATGGGCAATCCT
-GAGCCAAATCCTAGTTTTACAAGAACAAACAAGGGTTCAGAAAGCGAAAAAAAAAAA-G
GGGGATAGGTGCAGAGACTCAACGGAAGCTGTTCTAAGAAATGGGGTTGACTGCCTTTTT
TGGTAAAGAAAGGAAAAGAAATCCTTCTATCGAATATCGAAACTCCATAAAGGATGAAGG
ATAAGCGTATATACACTATGTATACACAATGAAAAACTATCTCAAAAATGACAACCGAAT
CCGTATTTTTTTTTATGAAAAAAAAAAAAATTGTTATGAATCAATTCCAAGTTGAAAAAA
GAATCGAATATTCATTGATCAAATCATTCACTCCATAGTCTGATCGATCTTTTCTTTTGA
AAAACTGATTAATCGGACAAGAATAAAGATAGAGTCCCATTCTACATGTCAATATCAATA
CCGGCAACAATGAAATTTAAAGTAAGAGGAAAATCCGTCGACTTTAAAAATCGTGAGGGT
TCAAG
>LD10
AGTGATAA--CTTT-CAAA--TTCAGAAGAAACCCTGGAATC--AAAAATGGGCAATCCT
-GAGCCAAATCCTAGTTTTACAAGAACAAACAAGGGTTCAGAAAGCGAAAAAAAAAAA-G
GGGGATAGGTGCAGAGACTCAACGGAAGCTGTTCTAAGAAATGGGGTTGACTGCCTTTTT
TGGTAAAGAAAGGAAAAGAAATCCTTCTATCGAATATCGAAACTCCATAAAGGATGAAGG
ATAAGCGTATATACACTATGTATACACAATGAAAAACTATCTCAAAAATGACAACCGAAT
CCGTATTTTTTTTTATGAAAAAAAAAAAAATTGTTATGAATCAATTCCAAGTTGAAAAAA
GAATCGAATATTCATTGATCAAATCATTCACTCCATAGTCTGATCGATCTTTTCTTTTGA
AAAACTGATTAATCGGACAAGAATAAAGATAGAGTCCCATTCTACATGTCAATATCAATA
CCGGCAACAATGAAATTTAAAGTAAGAGGAAAATCCGTCGACTTTAAAAATCGTGAGGGT
TCAAG
>TL01
AGTGATAA--CTTT-CAAA--TTCAGAAGAAACCCTGGAATC--AAAAATGGGCAATCCT
-GAGCCAAATCCTAGTTTTACAAGAACAAACAAGGGTTCAGAAAGCGAAAAAAAAAAA-G
GGGGATAGGTGCAGAGACTCAACGGAAGCTGTTCTAAGAAATGGGGTTGACTGCCTTTTT
TGGTAAAGAAAGGAAAAGAAATCCTTCTATCGAATATCGAAACTCCATAAAGGATGAAGG
ATAAGCGTATATACACTATGTATACACAATGAAAAACTATCTCAAAAATGACAACCGAAT
CCGTATTTTTTTTTATGAAAAAAAAAAAAATTGTTATGAATCAATTCCAAGTTGAAAAAA
GAATCGAATATTCATTGATCAAATCATTCACTCCATAGTCTGATCGATCTTTTCTTTTGA
AAAACTGATTAATCGGACAAGAATAAAGATAGAGTCCCATTCTACATGTCAATATCAATA
CCGGCAACAATGAAATTTAAAGTAAGAGGAAAATCCGTCGACTTTAAAAATCGTGAGGGT
TCAAG


H30
>TL03
AGTGATAA--CTTT-CAAA--TTCAGA-GAAACCCTGGAATC--AAAAATGGGCAATCCT
-GAGCCAAATCCT-GTTTTACAAGAACAAACAAGGGTTCAGAAAGCGAAAAAAAAA-AAG
GGGGATAGGTGCAGAGACTCAACGGAAGCTGTTCTAAAAAATGGGGTTGACTGCCTTTTT
TGGTAAAAAAAGGAAAAAAAATCCTTCTATCGAATATCGAAACTCCATAAAGGATGAAGG
ATAAGCGTATATACACTATGTATACACAATGAAAAACTATCTCAAAAATGACAACCGAAT
CCGTATTTTTTTTTATGAAAAAAAAAAAAATTGTTATGAATCAATTCCAAGTTGAAAAAA
AAATCGAATATTCATTGATCAAATCATTCACTCCATAGTCTGATCGATCTTTTCTTTTGA
AAAACTGATTAATCGGACAAAAATAAAGATAGAGTCCCATTCTACATGTCAATATCAATA
CCGGCAACAATGAAATTTAAAGTAAGAGGAAAATCCGTCGACTTTAAAAATCGTGAGGGT
TCAAG
>CH12
AGTGATAA--CTTT-CAAA--TTCAGA-GAAACCCTGGAATC--AAAAATGGGCAATCCT
-GAGCCAAATCCT-GTTTTACAAGAACAAACAAGGGTTCAGAAAGCGAAAAAAAAA-AAG
GGGGATAGGTGCAGAGACTCAACGGAAGCTGTTCTAAAAAATGGGGTTGACTGCCTTTTT
TGGTAAAAAAAGGAAAAAAAATCCTTCTATCGAATATCGAAACTCCATAAAGGATGAAGG
ATAAGCGTATATACACTATGTATACACAATGAAAAACTATCTCAAAAATGACAACCGAAT
CCGTATTTTTTTTTATGAAAAAAAAAAAAATTGTTATGAATCAATTCCAAGTTGAAAAAA
AAATCGAATATTCATTGATCAAATCATTCACTCCATAGTCTGATCGATCTTTTCTTTTGA
AAAACTGATTAATCGGACAAAAATAAAGATAGAGTCCCATTCTACATGTCAATATCAATA
CCGGCAACAATGAAATTTAAAGTAAGAGGAAAATCCGTCGACTTTAAAAATCGTGAGGGT
TCAAG


H31
>XY02
AGTGATAA--CTTT-C--AAATTCAGA-GAAACCCTGGAATC--AAAAATGGGCAATCCT
-GAGCCAAATCCT-GTTTTACAAGAACAAACAAGGGTTCAGAAAGCGAAAAAAAAA-AAG
GGGGATAGGTGCAAAAACTCAACGGAAGCTGTTCTAAAAAATGGGGTTGACTGCCTTTTT
TGGTAAAAAAAGGAAAAAAAATCCTTCTATCGAATATCGAAACTCCATAAAGGATGAAGG
ATAAGCGTATATACACTATGTATACACAATGAAAAACTATCTCAAAAATGACAACCGAAT
CCGTATTTTTTTTTATGAAAAAAAAAAAAATTGTTATGAATCAATTCCAAGTTGAAAAAA
GAATCGAATATTCATTGATCAAATCATTCACTCCATAGTCTGATCGATCTTTTCTTTTGA
AAAACTGATTAATCGGACAAAAATAAAGATAGAGTCCCATTCTACATGTCAATATCAATA
CCGGCAACAATGAAATTTAAAGTAAGAGGAAAATCCGTCGACTTTAAAAATCGTGAGGGT
TCAAG
>XL05
AGTGATAA--CTTT-C--AAATTCAGA-GAAACCCTGGAATC--AAAAATGGGCAATCCT
-GAGCCAAATCCT-GTTTTACAAGAACAAACAAGGGTTCAGAAAGCGAAAAAAAAA-AAG
GGGGATAGGTGCAAAAACTCAACGGAAGCTGTTCTAAAAAATGGGGTTGACTGCCTTTTT
TGGTAAAAAAAGGAAAAAAAATCCTTCTATCGAATATCGAAACTCCATAAAGGATGAAGG
ATAAGCGTATATACACTATGTATACACAATGAAAAACTATCTCAAAAATGACAACCGAAT
CCGTATTTTTTTTTATGAAAAAAAAAAAAATTGTTATGAATCAATTCCAAGTTGAAAAAA
GAATCGAATATTCATTGATCAAATCATTCACTCCATAGTCTGATCGATCTTTTCTTTTGA
AAAACTGATTAATCGGACAAAAATAAAGATAGAGTCCCATTCTACATGTCAATATCAATA
CCGGCAACAATGAAATTTAAAGTAAGAGGAAAATCCGTCGACTTTAAAAATCGTGAGGGT
TCAAG
>WM21
AGTGATAA--CTTT-C--AAATTCAGA-GAAACCCTGGAATC--AAAAATGGGCAATCCT
-GAGCCAAATCCT-GTTTTACAAGAACAAACAAGGGTTCAGAAAGCGAAAAAAAAA-AAG
GGGGATAGGTGCAAAAACTCAACGGAAGCTGTTCTAAAAAATGGGGTTGACTGCCTTTTT
TGGTAAAAAAAGGAAAAAAAATCCTTCTATCGAATATCGAAACTCCATAAAGGATGAAGG
ATAAGCGTATATACACTATGTATACACAATGAAAAACTATCTCAAAAATGACAACCGAAT
CCGTATTTTTTTTTATGAAAAAAAAAAAAATTGTTATGAATCAATTCCAAGTTGAAAAAA
GAATCGAATATTCATTGATCAAATCATTCACTCCATAGTCTGATCGATCTTTTCTTTTGA
AAAACTGATTAATCGGACAAAAATAAAGATAGAGTCCCATTCTACATGTCAATATCAATA
CCGGCAACAATGAAATTTAAAGTAAGAGGAAAATCCGTCGACTTTAAAAATCGTGAGGGT
TCAAG
>BS11
AGTGATAA--CTTT-C--AAATTCAGA-GAAACCCTGGAATC--AAAAATGGGCAATCCT
-GAGCCAAATCCT-GTTTTACAAGAACAAACAAGGGTTCAGAAAGCGAAAAAAAAA-AAG
GGGGATAGGTGCAAAAACTCAACGGAAGCTGTTCTAAAAAATGGGGTTGACTGCCTTTTT
TGGTAAAAAAAGGAAAAAAAATCCTTCTATCGAATATCGAAACTCCATAAAGGATGAAGG
ATAAGCGTATATACACTATGTATACACAATGAAAAACTATCTCAAAAATGACAACCGAAT
CCGTATTTTTTTTTATGAAAAAAAAAAAAATTGTTATGAATCAATTCCAAGTTGAAAAAA
GAATCGAATATTCATTGATCAAATCATTCACTCCATAGTCTGATCGATCTTTTCTTTTGA
AAAACTGATTAATCGGACAAAAATAAAGATAGAGTCCCATTCTACATGTCAATATCAATA
CCGGCAACAATGAAATTTAAAGTAAGAGGAAAATCCGTCGACTTTAAAAATCGTGAGGGT
TCAAG

H32
>XY03
AGTGATAA--CTTT-CAAA--TTCAGA-GAAACCCTGGAATC--AAAAATGGGCAATCCT-GAGCCAAATCCT-GTTTTACAAGAACAAACAAGGGTTCAGAAAGCGAAAAAAAAA-AAGGGGGATAGGTGCAGAGACTCAACGGAAGCTGTTCTAAGAAATGGGGTTGACTGCCTTTTTTGGTAAAGAAAGGAAAAGAAATCCTTCTATCGAATATCGAAACTCCATAAAGGATGAAGGATAAGCGTATATACACTATGTATACACAATGAAAAACTATCTCAAAAATGACAACCGAATCCGTATTTTTTTTTATGAAAAAAAAAAAAATTGTTATGAATCAATTCCAAGTTGAAAAAAGAATCGAATATTCATTGATCAAATCATTCACTCCATAGTCTGATCGATCTTTTCTTTTGAAAAACTGATTAATCGGACAAAAATAAAGATAGAGTCCCATTCTACATGTCAATATCAATACCGGCAACAATGAAATTTAAAGTAAGAGGAAAATCCGTCGACTTTAAAAATCGTGAGGGTTCAAG
>XL16
AGTGATAA--CTTT-CAAA--TTCAGA-GAAACCCTGGAATC--AAAAATGGGCAATCCT-GAGCCAAATCCT-GTTTTACAAGAACAAACAAGGGTTCAGAAAGCGAAAAAAAAA-AAGGGGGATAGGTGCAGAGACTCAACGGAAGCTGTTCTAAGAAATGGGGTTGACTGCCTTTTTTGGTAAAGAAAGGAAAAGAAATCCTTCTATCGAATATCGAAACTCCATAAAGGATGAAGGATAAGCGTATATACACTATGTATACACAATGAAAAACTATCTCAAAAATGACAACCGAATCCGTATTTTTTTTTATGAAAAAAAAAAAAATTGTTATGAATCAATTCCAAGTTGAAAAAAGAATCGAATATTCATTGATCAAATCATTCACTCCATAGTCTGATCGATCTTTTCTTTTGAAAAACTGATTAATCGGACAAAAATAAAGATAGAGTCCCATTCTACATGTCAATATCAATACCGGCAACAATGAAATTTAAAGTAAGAGGAAAATCCGTCGACTTTAAAAATCGTGAGGGTTCAAG
>WM08
AGTGATAA--CTTT-CAAA--TTCAGA-GAAACCCTGGAATC--AAAAATGGGCAATCCT-GAGCCAAATCCT-GTTTTACAAGAACAAACAAGGGTTCAGAAAGCGAAAAAAAAA-AAGGGGGATAGGTGCAGAGACTCAACGGAAGCTGTTCTAAGAAATGGGGTTGACTGCCTTTTTTGGTAAAGAAAGGAAAAGAAATCCTTCTATCGAATATCGAAACTCCATAAAGGATGAAGGATAAGCGTATATACACTATGTATACACAATGAAAAACTATCTCAAAAATGACAACCGAATCCGTATTTTTTTTTATGAAAAAAAAAAAAATTGTTATGAATCAATTCCAAGTTGAAAAAAGAATCGAATATTCATTGATCAAATCATTCACTCCATAGTCTGATCGATCTTTTCTTTTGAAAAACTGATTAATCGGACAAAAATAAAGATAGAGTCCCATTCTACATGTCAATATCAATACCGGCAACAATGAAATTTAAAGTAAGAGGAAAATCCGTCGACTTTAAAAATCGTGAGGGTTCAAG
>YR14
AGTGATAA--CTTT-CAAA--TTCAGA-GAAACCCTGGAATC--AAAAATGGGCAATCCT-GAGCCAAATCCT-GTTTTACAAGAACAAACAAGGGTTCAGAAAGCGAAAAAAAAA-AAGGGGGATAGGTGCAGAGACTCAACGGAAGCTGTTCTAAGAAATGGGGTTGACTGCCTTTTTTGGTAAAGAAAGGAAAAGAAATCCTTCTATCGAATATCGAAACTCCATAAAGGATGAAGGATAAGCGTATATACACTATGTATACACAATGAAAAACTATCTCAAAAATGACAACCGAATCCGTATTTTTTTTTATGAAAAAAAAAAAAATTGTTATGAATCAATTCCAAGTTGAAAAAAGAATCGAATATTCATTGATCAAATCATTCACTCCATAGTCTGATCGATCTTTTCTTTTGAAAAACTGATTAATCGGACAAAAATAAAGATAGAGTCCCATTCTACATGTCAATATCAATACCGGCAACAATGAAATTTAAAGTAAGAGGAAAATCCGTCGACTTTAAAAATCGTGAGGGTTCAAG
>BS08
AGTGATAA--CTTT-CAAA--TTCAGA-GAAACCCTGGAATC--AAAAATGGGCAATCCT-GAGCCAAATCCT-GTTTTACAAGAACAAACAAGGGTTCAGAAAGCGAAAAAAAAA-AAGGGGGATAGGTGCAGAGACTCAACGGAAGCTGTTCTAAGAAATGGGGTTGACTGCCTTTTTTGGTAAAGAAAGGAAAAGAAATCCTTCTATCGAATATCGAAACTCCATAAAGGATGAAGGATAAGCGTATATACACTATGTATACACAATGAAAAACTATCTCAAAAATGACAACCGAATCCGTATTTTTTTTTATGAAAAAAAAAAAAATTGTTATGAATCAATTCCAAGTTGAAAAAAGAATCGAATATTCATTGATCAAATCATTCACTCCATAGTCTGATCGATCTTTTCTTTTGAAAAACTGATTAATCGGACAAAAATAAAGATAGAGTCCCATTCTACATGTCAATATCAATACCGGCAACAATGAAATTTAAAGTAAGAGGAAAATCCGTCGACTTTAAAAATCGTGAGGGTTCAAG
>LD01
AGTGATAA--CTTT-CAAA--TTCAGA-GAAACCCTGGAATC--AAAAATGGGCAATCCT-GAGCCAAATCCT-GTTTTACAAGAACAAACAAGGGTTCAGAAAGCGAAAAAAAAA-AAGGGGGATAGGTGCAGAGACTCAACGGAAGCTGTTCTAAGAAATGGGGTTGACTGCCTTTTTTGGTAAAGAAAGGAAAAGAAATCCTTCTATCGAATATCGAAACTCCATAAAGGATGAAGGATAAGCGTATATACACTATGTATACACAATGAAAAACTATCTCAAAAATGACAACCGAATCCGTATTTTTTTTTATGAAAAAAAAAAAAATTGTTATGAATCAATTCCAAGTTGAAAAAAGAATCGAATATTCATTGATCAAATCATTCACTCCATAGTCTGATCGATCTTTTCTTTTGAAAAACTGATTAATCGGACAAAAATAAAGATAGAGTCCCATTCTACATGTCAATATCAATACCGGCAACAATGAAATTTAAAGTAAGAGGAAAATCCGTCGACTTTAAAAATCGTGAGGGTTCAAG
>LD04
AGTGATAA--CTTT-CAAA--TTCAGA-GAAACCCTGGAATC--AAAAATGGGCAATCCT-GAGCCAAATCCT-GTTTTACAAGAACAAACAAGGGTTCAGAAAGCGAAAAAAAAA-AAGGGGGATAGGTGCAGAGACTCAACGGAAGCTGTTCTAAGAAATGGGGTTGACTGCCTTTTTTGGTAAAGAAAGGAAAAGAAATCCTTCTATCGAATATCGAAACTCCATAAAGGATGAAGGATAAGCGTATATACACTATGTATACACAATGAAAAACTATCTCAAAAATGACAACCGAATCCGTATTTTTTTTTATGAAAAAAAAAAAAATTGTTATGAATCAATTCCAAGTTGAAAAAAGAATCGAATATTCATTGATCAAATCATTCACTCCATAGTCTGATCGATCTTTTCTTTTGAAAAACTGATTAATCGGACAAAAATAAAGATAGAGTCCCATTCTACATGTCAATATCAATACCGGCAACAATGAAATTTAAAGTAAGAGGAAAATCCGTCGACTTTAAAAATCGTGAGGGTTCAAG
>LD05
AGTGATAA--CTTT-CAAA--TTCAGA-GAAACCCTGGAATC--AAAAATGGGCAATCCT-GAGCCAAATCCT-GTTTTACAAGAACAAACAAGGGTTCAGAAAGCGAAAAAAAAA-AAGGGGGATAGGTGCAGAGACTCAACGGAAGCTGTTCTAAGAAATGGGGTTGACTGCCTTTTTTGGTAAAGAAAGGAAAAGAAATCCTTCTATCGAATATCGAAACTCCATAAAGGATGAAGGATAAGCGTATATACACTATGTATACACAATGAAAAACTATCTCAAAAATGACAACCGAATCCGTATTTTTTTTTATGAAAAAAAAAAAAATTGTTATGAATCAATTCCAAGTTGAAAAAAGAATCGAATATTCATTGATCAAATCATTCACTCCATAGTCTGATCGATCTTTTCTTTTGAAAAACTGATTAATCGGACAAAAATAAAGATAGAGTCCCATTCTACATGTCAATATCAATACCGGCAACAATGAAATTTAAAGTAAGAGGAAAATCCGTCGACTTTAAAAATCGTGAGGGTTCAAG
>LD06
AGTGATAA--CTTT-CAAA--TTCAGA-GAAACCCTGGAATC--AAAAATGGGCAATCCT-GAGCCAAATCCT-GTTTTACAAGAACAAACAAGGGTTCAGAAAGCGAAAAAAAAA-AAGGGGGATAGGTGCAGAGACTCAACGGAAGCTGTTCTAAGAAATGGGGTTGACTGCCTTTTTTGGTAAAGAAAGGAAAAGAAATCCTTCTATCGAATATCGAAACTCCATAAAGGATGAAGGATAAGCGTATATACACTATGTATACACAATGAAAAACTATCTCAAAAATGACAACCGAATCCGTATTTTTTTTTATGAAAAAAAAAAAAATTGTTATGAATCAATTCCAAGTTGAAAAAAGAATCGAATATTCATTGATCAAATCATTCACTCCATAGTCTGATCGATCTTTTCTTTTGAAAAACTGATTAATCGGACAAAAATAAAGATAGAGTCCCATTCTACATGTCAATATCAATACCGGCAACAATGAAATTTAAAGTAAGAGGAAAATCCGTCGACTTTAAAAATCGTGAGGGTTCAAG
>JG03
AGTGATAA--CTTT-CAAA--TTCAGA-GAAACCCTGGAATC--AAAAATGGGCAATCCT-GAGCCAAATCCT-GTTTTACAAGAACAAACAAGGGTTCAGAAAGCGAAAAAAAAA-AAGGGGGATAGGTGCAGAGACTCAACGGAAGCTGTTCTAAGAAATGGGGTTGACTGCCTTTTTTGGTAAAGAAAGGAAAAGAAATCCTTCTATCGAATATCGAAACTCCATAAAGGATGAAGGATAAGCGTATATACACTATGTATACACAATGAAAAACTATCTCAAAAATGACAACCGAATCCGTATTTTTTTTTATGAAAAAAAAAAAAATTGTTATGAATCAATTCCAAGTTGAAAAAAGAATCGAATATTCATTGATCAAATCATTCACTCCATAGTCTGATCGATCTTTTCTTTTGAAAAACTGATTAATCGGACAAAAATAAAGATAGAGTCCCATTCTACATGTCAATATCAATACCGGCAACAATGAAATTTAAAGTAAGAGGAAAATCCGTCGACTTTAAAAATCGTGAGGGTTCAAG
>YF17
AGTGATAA--CTTT-CAAA--TTCAGA-GAAACCCTGGAATC--AAAAATGGGCAATCCT-GAGCCAAATCCT-GTTTTACAAGAACAAACAAGGGTTCAGAAAGCGAAAAAAAAA-AAGGGGGATAGGTGCAGAGACTCAACGGAAGCTGTTCTAAGAAATGGGGTTGACTGCCTTTTTTGGTAAAGAAAGGAAAAGAAATCCTTCTATCGAATATCGAAACTCCATAAAGGATGAAGGATAAGCGTATATACACTATGTATACACAATGAAAAACTATCTCAAAAATGACAACCGAATCCGTATTTTTTTTTATGAAAAAAAAAAAAATTGTTATGAATCAATTCCAAGTTGAAAAAAGAATCGAATATTCATTGATCAAATCATTCACTCCATAGTCTGATCGATCTTTTCTTTTGAAAAACTGATTAATCGGACAAAAATAAAGATAGAGTCCCATTCTACATGTCAATATCAATACCGGCAACAATGAAATTTAAAGTAAGAGGAAAATCCGTCGACTTTAAAAATCGTGAGGGTTCAAG
>LC14
AGTGATAA--CTTT-CAAA--TTCAGA-GAAACCCTGGAATC--AAAAATGGGCAATCCT-GAGCCAAATCCT-GTTTTACAAGAACAAACAAGGGTTCAGAAAGCGAAAAAAAAA-AAGGGGGATAGGTGCAGAGACTCAACGGAAGCTGTTCTAAGAAATGGGGTTGACTGCCTTTTTTGGTAAAGAAAGGAAAAGAAATCCTTCTATCGAATATCGAAACTCCATAAAGGATGAAGGATAAGCGTATATACACTATGTATACACAATGAAAAACTATCTCAAAAATGACAACCGAATCCGTATTTTTTTTTATGAAAAAAAAAAAAATTGTTATGAATCAATTCCAAGTTGAAAAAAGAATCGAATATTCATTGATCAAATCATTCACTCCATAGTCTGATCGATCTTTTCTTTTGAAAAACTGATTAATCGGACAAAAATAAAGATAGAGTCCCATTCTACATGTCAATATCAATACCGGCAACAATGAAATTTAAAGTAAGAGGAAAATCCGTCGACTTTAAAAATCGTGAGGGTTCAAG


H33
>CH02
AGTGATAA--CTTT-CAAA--TTCAGA-GAAACCCTGGAATC--AAAAATGGGCAATCCT
-GAGCCAAATCCT-GTTTTACAAGAACAAACAAGGGTTCAGAAAGCGAAAAAAAAA-AAG
GGGGATAGGTGCAGAGACTCAACGGAAGCTGTTCTAAAAAATGGGGTTGACTGCCTTTTT
TGGTAAAAAAAGGAAAAAAAATCCTTCTATCGAATATCGAAACTCCATAAAGGATGAAGG
ATAAGCGTATATACACTATGTATACACAATGAAAAACTATCTCAAAAATGACAACCGAAT
CCGTATTTTTTTTTATGAAAAAAAAAAAAATTGTTATGAATCAATTCCAAGTTGAAAAAA
GAATCGAATATTCATTGATCAAATCATTCACTCCATAGTCTGATCGATCTTTTCTTTTGA
AAAACTGATTAATCGGACAAAAATAAAGATAGAGTCCCATTCTACATGTCAATATCAATA
CCGGCAACAATGAAATTTAAAGTAAAAGGAAAATCCGTCGACTTTAAAAATCGTGAGGGT
TCAAG
>CH03
AGTGATAA--CTTT-CAAA--TTCAGA-GAAACCCTGGAATC--AAAAATGGGCAATCCT
-GAGCCAAATCCT-GTTTTACAAGAACAAACAAGGGTTCAGAAAGCGAAAAAAAAA-AAG
GGGGATAGGTGCAGAGACTCAACGGAAGCTGTTCTAAAAAATGGGGTTGACTGCCTTTTT
TGGTAAAAAAAGGAAAAAAAATCCTTCTATCGAATATCGAAACTCCATAAAGGATGAAGG
ATAAGCGTATATACACTATGTATACACAATGAAAAACTATCTCAAAAATGACAACCGAAT
CCGTATTTTTTTTTATGAAAAAAAAAAAAATTGTTATGAATCAATTCCAAGTTGAAAAAA
GAATCGAATATTCATTGATCAAATCATTCACTCCATAGTCTGATCGATCTTTTCTTTTGA
AAAACTGATTAATCGGACAAAAATAAAGATAGAGTCCCATTCTACATGTCAATATCAATA
CCGGCAACAATGAAATTTAAAGTAAAAGGAAAATCCGTCGACTTTAAAAATCGTGAGGGT
TCAAG
>PW19
AGTGATAA--CTTT-CAAA--TTCAGA-GAAACCCTGGAATC--AAAAATGGGCAATCCT
-GAGCCAAATCCT-GTTTTACAAGAACAAACAAGGGTTCAGAAAGCGAAAAAAAAA-AAG
GGGGATAGGTGCAGAGACTCAACGGAAGCTGTTCTAAAAAATGGGGTTGACTGCCTTTTT
TGGTAAAAAAAGGAAAAAAAATCCTTCTATCGAATATCGAAACTCCATAAAGGATGAAGG
ATAAGCGTATATACACTATGTATACACAATGAAAAACTATCTCAAAAATGACAACCGAAT
CCGTATTTTTTTTTATGAAAAAAAAAAAAATTGTTATGAATCAATTCCAAGTTGAAAAAA
GAATCGAATATTCATTGATCAAATCATTCACTCCATAGTCTGATCGATCTTTTCTTTTGA
AAAACTGATTAATCGGACAAAAATAAAGATAGAGTCCCATTCTACATGTCAATATCAATA
CCGGCAACAATGAAATTTAAAGTAAAAGGAAAATCCGTCGACTTTAAAAATCGTGAGGGT
TCAAG


H34
>XY05
AGTGATAA--CTTT-C--AAATTCAGA-GAAACCCTGGAATC--AAAAATGGGCAATCCT-GAGCCAAATCCT-GTTTTACAAGAACAAACAAGGGTTCAGAAAGCGAAAAAAAAA-AAGGGGGATAGGTGCAGAGACTCAACGGAAGCTGTTCTAAAAAATGGGGTTGACTGCCTTTTTTGGTAAAGAAAGGAAAAAAAATCCTTCTATCGAATATCGAAACTCCATAAAGGATGAAGGATAAGCGTATATACACTATGTATACACAATGAAAAACTATCTCAAAAATGACAACCGAATCCGTATTTTTTTTTATGAAAAAAAAAAAAATTGTTATGAATCAATTCCAAGTTGAAAAAAGAATCGAATATTCATTGATCAAATCATTCACTCCATAGTCTGATCGATCTTTTCTTTTGAAAAACTGATTAATCGGACAAAAATAAAGATAGAGTCCCATTCTACATGTCAATATCAATACCGGCAACAATGAAATTTAAAGTAAGAGGAAAATCCGTCGACTTTAAAAATCGTGAGGGTTCAAG
>XL17
AGTGATAA--CTTT-C--AAATTCAGA-GAAACCCTGGAATC--AAAAATGGGCAATCCT-GAGCCAAATCCT-GTTTTACAAGAACAAACAAGGGTTCAGAAAGCGAAAAAAAAA-AAGGGGGATAGGTGCAGAGACTCAACGGAAGCTGTTCTAAAAAATGGGGTTGACTGCCTTTTTTGGTAAAGAAAGGAAAAAAAATCCTTCTATCGAATATCGAAACTCCATAAAGGATGAAGGATAAGCGTATATACACTATGTATACACAATGAAAAACTATCTCAAAAATGACAACCGAATCCGTATTTTTTTTTATGAAAAAAAAAAAAATTGTTATGAATCAATTCCAAGTTGAAAAAAGAATCGAATATTCATTGATCAAATCATTCACTCCATAGTCTGATCGATCTTTTCTTTTGAAAAACTGATTAATCGGACAAAAATAAAGATAGAGTCCCATTCTACATGTCAATATCAATACCGGCAACAATGAAATTTAAAGTAAGAGGAAAATCCGTCGACTTTAAAAATCGTGAGGGTTCAAG
>WM07
AGTGATAA--CTTT-C--AAATTCAGA-GAAACCCTGGAATC--AAAAATGGGCAATCCT-GAGCCAAATCCT-GTTTTACAAGAACAAACAAGGGTTCAGAAAGCGAAAAAAAAA-AAGGGGGATAGGTGCAGAGACTCAACGGAAGCTGTTCTAAAAAATGGGGTTGACTGCCTTTTTTGGTAAAGAAAGGAAAAAAAATCCTTCTATCGAATATCGAAACTCCATAAAGGATGAAGGATAAGCGTATATACACTATGTATACACAATGAAAAACTATCTCAAAAATGACAACCGAATCCGTATTTTTTTTTATGAAAAAAAAAAAAATTGTTATGAATCAATTCCAAGTTGAAAAAAGAATCGAATATTCATTGATCAAATCATTCACTCCATAGTCTGATCGATCTTTTCTTTTGAAAAACTGATTAATCGGACAAAAATAAAGATAGAGTCCCATTCTACATGTCAATATCAATACCGGCAACAATGAAATTTAAAGTAAGAGGAAAATCCGTCGACTTTAAAAATCGTGAGGGTTCAAG
>YR08
AGTGATAA--CTTT-C--AAATTCAGA-GAAACCCTGGAATC--AAAAATGGGCAATCCT-GAGCCAAATCCT-GTTTTACAAGAACAAACAAGGGTTCAGAAAGCGAAAAAAAAA-AAGGGGGATAGGTGCAGAGACTCAACGGAAGCTGTTCTAAAAAATGGGGTTGACTGCCTTTTTTGGTAAAGAAAGGAAAAAAAATCCTTCTATCGAATATCGAAACTCCATAAAGGATGAAGGATAAGCGTATATACACTATGTATACACAATGAAAAACTATCTCAAAAATGACAACCGAATCCGTATTTTTTTTTATGAAAAAAAAAAAAATTGTTATGAATCAATTCCAAGTTGAAAAAAGAATCGAATATTCATTGATCAAATCATTCACTCCATAGTCTGATCGATCTTTTCTTTTGAAAAACTGATTAATCGGACAAAAATAAAGATAGAGTCCCATTCTACATGTCAATATCAATACCGGCAACAATGAAATTTAAAGTAAGAGGAAAATCCGTCGACTTTAAAAATCGTGAGGGTTCAAG
>LD02
AGTGATAA--CTTT-C--AAATTCAGA-GAAACCCTGGAATC--AAAAATGGGCAATCCT-GAGCCAAATCCT-GTTTTACAAGAACAAACAAGGGTTCAGAAAGCGAAAAAAAAA-AAGGGGGATAGGTGCAGAGACTCAACGGAAGCTGTTCTAAAAAATGGGGTTGACTGCCTTTTTTGGTAAAGAAAGGAAAAAAAATCCTTCTATCGAATATCGAAACTCCATAAAGGATGAAGGATAAGCGTATATACACTATGTATACACAATGAAAAACTATCTCAAAAATGACAACCGAATCCGTATTTTTTTTTATGAAAAAAAAAAAAATTGTTATGAATCAATTCCAAGTTGAAAAAAGAATCGAATATTCATTGATCAAATCATTCACTCCATAGTCTGATCGATCTTTTCTTTTGAAAAACTGATTAATCGGACAAAAATAAAGATAGAGTCCCATTCTACATGTCAATATCAATACCGGCAACAATGAAATTTAAAGTAAGAGGAAAATCCGTCGACTTTAAAAATCGTGAGGGTTCAAG
>TL11
AGTGATAA--CTTT-C--AAATTCAGA-GAAACCCTGGAATC--AAAAATGGGCAATCCT-GAGCCAAATCCT-GTTTTACAAGAACAAACAAGGGTTCAGAAAGCGAAAAAAAAA-AAGGGGGATAGGTGCAGAGACTCAACGGAAGCTGTTCTAAAAAATGGGGTTGACTGCCTTTTTTGGTAAAGAAAGGAAAAAAAATCCTTCTATCGAATATCGAAACTCCATAAAGGATGAAGGATAAGCGTATATACACTATGTATACACAATGAAAAACTATCTCAAAAATGACAACCGAATCCGTATTTTTTTTTATGAAAAAAAAAAAAATTGTTATGAATCAATTCCAAGTTGAAAAAAGAATCGAATATTCATTGATCAAATCATTCACTCCATAGTCTGATCGATCTTTTCTTTTGAAAAACTGATTAATCGGACAAAAATAAAGATAGAGTCCCATTCTACATGTCAATATCAATACCGGCAACAATGAAATTTAAAGTAAGAGGAAAATCCGTCGACTTTAAAAATCGTGAGGGTTCAAG
>TL15
AGTGATAA--CTTT-C--AAATTCAGA-GAAACCCTGGAATC--AAAAATGGGCAATCCT-GAGCCAAATCCT-GTTTTACAAGAACAAACAAGGGTTCAGAAAGCGAAAAAAAAA-AAGGGGGATAGGTGCAGAGACTCAACGGAAGCTGTTCTAAAAAATGGGGTTGACTGCCTTTTTTGGTAAAGAAAGGAAAAAAAATCCTTCTATCGAATATCGAAACTCCATAAAGGATGAAGGATAAGCGTATATACACTATGTATACACAATGAAAAACTATCTCAAAAATGACAACCGAATCCGTATTTTTTTTTATGAAAAAAAAAAAAATTGTTATGAATCAATTCCAAGTTGAAAAAAGAATCGAATATTCATTGATCAAATCATTCACTCCATAGTCTGATCGATCTTTTCTTTTGAAAAACTGATTAATCGGACAAAAATAAAGATAGAGTCCCATTCTACATGTCAATATCAATACCGGCAACAATGAAATTTAAAGTAAGAGGAAAATCCGTCGACTTTAAAAATCGTGAGGGTTCAAG
>TL24
AGTGATAA--CTTT-C--AAATTCAGA-GAAACCCTGGAATC--AAAAATGGGCAATCCT-GAGCCAAATCCT-GTTTTACAAGAACAAACAAGGGTTCAGAAAGCGAAAAAAAAA-AAGGGGGATAGGTGCAGAGACTCAACGGAAGCTGTTCTAAAAAATGGGGTTGACTGCCTTTTTTGGTAAAGAAAGGAAAAAAAATCCTTCTATCGAATATCGAAACTCCATAAAGGATGAAGGATAAGCGTATATACACTATGTATACACAATGAAAAACTATCTCAAAAATGACAACCGAATCCGTATTTTTTTTTATGAAAAAAAAAAAAATTGTTATGAATCAATTCCAAGTTGAAAAAAGAATCGAATATTCATTGATCAAATCATTCACTCCATAGTCTGATCGATCTTTTCTTTTGAAAAACTGATTAATCGGACAAAAATAAAGATAGAGTCCCATTCTACATGTCAATATCAATACCGGCAACAATGAAATTTAAAGTAAGAGGAAAATCCGTCGACTTTAAAAATCGTGAGGGTTCAAG
>TL26
AGTGATAA--CTTT-C--AAATTCAGA-GAAACCCTGGAATC--AAAAATGGGCAATCCT-GAGCCAAATCCT-GTTTTACAAGAACAAACAAGGGTTCAGAAAGCGAAAAAAAAA-AAGGGGGATAGGTGCAGAGACTCAACGGAAGCTGTTCTAAAAAATGGGGTTGACTGCCTTTTTTGGTAAAGAAAGGAAAAAAAATCCTTCTATCGAATATCGAAACTCCATAAAGGATGAAGGATAAGCGTATATACACTATGTATACACAATGAAAAACTATCTCAAAAATGACAACCGAATCCGTATTTTTTTTTATGAAAAAAAAAAAAATTGTTATGAATCAATTCCAAGTTGAAAAAAGAATCGAATATTCATTGATCAAATCATTCACTCCATAGTCTGATCGATCTTTTCTTTTGAAAAACTGATTAATCGGACAAAAATAAAGATAGAGTCCCATTCTACATGTCAATATCAATACCGGCAACAATGAAATTTAAAGTAAGAGGAAAATCCGTCGACTTTAAAAATCGTGAGGGTTCAAG
>CH13
AGTGATAA--CTTT-C--AAATTCAGA-GAAACCCTGGAATC--AAAAATGGGCAATCCT-GAGCCAAATCCT-GTTTTACAAGAACAAACAAGGGTTCAGAAAGCGAAAAAAAAA-AAGGGGGATAGGTGCAGAGACTCAACGGAAGCTGTTCTAAAAAATGGGGTTGACTGCCTTTTTTGGTAAAGAAAGGAAAAAAAATCCTTCTATCGAATATCGAAACTCCATAAAGGATGAAGGATAAGCGTATATACACTATGTATACACAATGAAAAACTATCTCAAAAATGACAACCGAATCCGTATTTTTTTTTATGAAAAAAAAAAAAATTGTTATGAATCAATTCCAAGTTGAAAAAAGAATCGAATATTCATTGATCAAATCATTCACTCCATAGTCTGATCGATCTTTTCTTTTGAAAAACTGATTAATCGGACAAAAATAAAGATAGAGTCCCATTCTACATGTCAATATCAATACCGGCAACAATGAAATTTAAAGTAAGAGGAAAATCCGTCGACTTTAAAAATCGTGAGGGTTCAAG
>CH16
AGTGATAA--CTTT-C--AAATTCAGA-GAAACCCTGGAATC--AAAAATGGGCAATCCT-GAGCCAAATCCT-GTTTTACAAGAACAAACAAGGGTTCAGAAAGCGAAAAAAAAA-AAGGGGGATAGGTGCAGAGACTCAACGGAAGCTGTTCTAAAAAATGGGGTTGACTGCCTTTTTTGGTAAAGAAAGGAAAAAAAATCCTTCTATCGAATATCGAAACTCCATAAAGGATGAAGGATAAGCGTATATACACTATGTATACACAATGAAAAACTATCTCAAAAATGACAACCGAATCCGTATTTTTTTTTATGAAAAAAAAAAAAATTGTTATGAATCAATTCCAAGTTGAAAAAAGAATCGAATATTCATTGATCAAATCATTCACTCCATAGTCTGATCGATCTTTTCTTTTGAAAAACTGATTAATCGGACAAAAATAAAGATAGAGTCCCATTCTACATGTCAATATCAATACCGGCAACAATGAAATTTAAAGTAAGAGGAAAATCCGTCGACTTTAAAAATCGTGAGGGTTCAAG
>CH20
AGTGATAA--CTTT-C--AAATTCAGA-GAAACCCTGGAATC--AAAAATGGGCAATCCT-GAGCCAAATCCT-GTTTTACAAGAACAAACAAGGGTTCAGAAAGCGAAAAAAAAA-AAGGGGGATAGGTGCAGAGACTCAACGGAAGCTGTTCTAAAAAATGGGGTTGACTGCCTTTTTTGGTAAAGAAAGGAAAAAAAATCCTTCTATCGAATATCGAAACTCCATAAAGGATGAAGGATAAGCGTATATACACTATGTATACACAATGAAAAACTATCTCAAAAATGACAACCGAATCCGTATTTTTTTTTATGAAAAAAAAAAAAATTGTTATGAATCAATTCCAAGTTGAAAAAAGAATCGAATATTCATTGATCAAATCATTCACTCCATAGTCTGATCGATCTTTTCTTTTGAAAAACTGATTAATCGGACAAAAATAAAGATAGAGTCCCATTCTACATGTCAATATCAATACCGGCAACAATGAAATTTAAAGTAAGAGGAAAATCCGTCGACTTTAAAAATCGTGAGGGTTCAAG
>PW12
AGTGATAA--CTTT-C--AAATTCAGA-GAAACCCTGGAATC--AAAAATGGGCAATCCT-GAGCCAAATCCT-GTTTTACAAGAACAAACAAGGGTTCAGAAAGCGAAAAAAAAA-AAGGGGGATAGGTGCAGAGACTCAACGGAAGCTGTTCTAAAAAATGGGGTTGACTGCCTTTTTTGGTAAAGAAAGGAAAAAAAATCCTTCTATCGAATATCGAAACTCCATAAAGGATGAAGGATAAGCGTATATACACTATGTATACACAATGAAAAACTATCTCAAAAATGACAACCGAATCCGTATTTTTTTTTATGAAAAAAAAAAAAATTGTTATGAATCAATTCCAAGTTGAAAAAAGAATCGAATATTCATTGATCAAATCATTCACTCCATAGTCTGATCGATCTTTTCTTTTGAAAAACTGATTAATCGGACAAAAATAAAGATAGAGTCCCATTCTACATGTCAATATCAATACCGGCAACAATGAAATTTAAAGTAAGAGGAAAATCCGTCGACTTTAAAAATCGTGAGGGTTCAAG

H35
>XY06
AGTGATAA--CTTT-CAAA--TTCAGA-GAAACCCTGGAATC--AAAAATGGGCAATCCT-GAGCCAAATCCT-GTTTTACAAGAACAAACAAGGGTTCAGAAAGCGAAAAAAAAA-AAGGGGGATAGGTGCAGAGACTCAACGGAAGCTGTTCTAAAAAATGGGGTTGACTGCCTTTTTTGGTAAAGAAAGGAAAAGAAATCCTTCTATCGAATATCGAAACTCCATAAAGGATGAAGGATAAGCGTATATACACTATGTATACACAATGAAAAACTATCTCAAAAATGACAACCGAATCCGTATTTTTTTTTATGAAAAAAAAAAAAATTGTTATGAATCAATTCCAAGTTGAAAAAAGAATCGAATATTCATTGATCAAATCATTCACTCCATAGTCTGATCGATCTTTTCTTTTGAAAAACTGATTAATCGGACAAAAATAAAGATAGAGTCCCATTCTACATGTCAATATCAATACCGGCAACAATGAAATTTAAAGTAAGAGGAAAATCCGTCGACTTTAAAAATCGTGAGGGTTCAAG
>XY09
AGTGATAA--CTTT-CAAA--TTCAGA-GAAACCCTGGAATC--AAAAATGGGCAATCCT-GAGCCAAATCCT-GTTTTACAAGAACAAACAAGGGTTCAGAAAGCGAAAAAAAAA-AAGGGGGATAGGTGCAGAGACTCAACGGAAGCTGTTCTAAAAAATGGGGTTGACTGCCTTTTTTGGTAAAGAAAGGAAAAGAAATCCTTCTATCGAATATCGAAACTCCATAAAGGATGAAGGATAAGCGTATATACACTATGTATACACAATGAAAAACTATCTCAAAAATGACAACCGAATCCGTATTTTTTTTTATGAAAAAAAAAAAAATTGTTATGAATCAATTCCAAGTTGAAAAAAGAATCGAATATTCATTGATCAAATCATTCACTCCATAGTCTGATCGATCTTTTCTTTTGAAAAACTGATTAATCGGACAAAAATAAAGATAGAGTCCCATTCTACATGTCAATATCAATACCGGCAACAATGAAATTTAAAGTAAGAGGAAAATCCGTCGACTTTAAAAATCGTGAGGGTTCAAG
>XL08
AGTGATAA--CTTT-CAAA--TTCAGA-GAAACCCTGGAATC--AAAAATGGGCAATCCT-GAGCCAAATCCT-GTTTTACAAGAACAAACAAGGGTTCAGAAAGCGAAAAAAAAA-AAGGGGGATAGGTGCAGAGACTCAACGGAAGCTGTTCTAAAAAATGGGGTTGACTGCCTTTTTTGGTAAAGAAAGGAAAAGAAATCCTTCTATCGAATATCGAAACTCCATAAAGGATGAAGGATAAGCGTATATACACTATGTATACACAATGAAAAACTATCTCAAAAATGACAACCGAATCCGTATTTTTTTTTATGAAAAAAAAAAAAATTGTTATGAATCAATTCCAAGTTGAAAAAAGAATCGAATATTCATTGATCAAATCATTCACTCCATAGTCTGATCGATCTTTTCTTTTGAAAAACTGATTAATCGGACAAAAATAAAGATAGAGTCCCATTCTACATGTCAATATCAATACCGGCAACAATGAAATTTAAAGTAAGAGGAAAATCCGTCGACTTTAAAAATCGTGAGGGTTCAAG
>XL20
AGTGATAA--CTTT-CAAA--TTCAGA-GAAACCCTGGAATC--AAAAATGGGCAATCCT-GAGCCAAATCCT-GTTTTACAAGAACAAACAAGGGTTCAGAAAGCGAAAAAAAAA-AAGGGGGATAGGTGCAGAGACTCAACGGAAGCTGTTCTAAAAAATGGGGTTGACTGCCTTTTTTGGTAAAGAAAGGAAAAGAAATCCTTCTATCGAATATCGAAACTCCATAAAGGATGAAGGATAAGCGTATATACACTATGTATACACAATGAAAAACTATCTCAAAAATGACAACCGAATCCGTATTTTTTTTTATGAAAAAAAAAAAAATTGTTATGAATCAATTCCAAGTTGAAAAAAGAATCGAATATTCATTGATCAAATCATTCACTCCATAGTCTGATCGATCTTTTCTTTTGAAAAACTGATTAATCGGACAAAAATAAAGATAGAGTCCCATTCTACATGTCAATATCAATACCGGCAACAATGAAATTTAAAGTAAGAGGAAAATCCGTCGACTTTAAAAATCGTGAGGGTTCAAG
>XL23
AGTGATAA--CTTT-CAAA--TTCAGA-GAAACCCTGGAATC--AAAAATGGGCAATCCT-GAGCCAAATCCT-GTTTTACAAGAACAAACAAGGGTTCAGAAAGCGAAAAAAAAA-AAGGGGGATAGGTGCAGAGACTCAACGGAAGCTGTTCTAAAAAATGGGGTTGACTGCCTTTTTTGGTAAAGAAAGGAAAAGAAATCCTTCTATCGAATATCGAAACTCCATAAAGGATGAAGGATAAGCGTATATACACTATGTATACACAATGAAAAACTATCTCAAAAATGACAACCGAATCCGTATTTTTTTTTATGAAAAAAAAAAAAATTGTTATGAATCAATTCCAAGTTGAAAAAAGAATCGAATATTCATTGATCAAATCATTCACTCCATAGTCTGATCGATCTTTTCTTTTGAAAAACTGATTAATCGGACAAAAATAAAGATAGAGTCCCATTCTACATGTCAATATCAATACCGGCAACAATGAAATTTAAAGTAAGAGGAAAATCCGTCGACTTTAAAAATCGTGAGGGTTCAAG
>WM02
AGTGATAA--CTTT-CAAA--TTCAGA-GAAACCCTGGAATC--AAAAATGGGCAATCCT-GAGCCAAATCCT-GTTTTACAAGAACAAACAAGGGTTCAGAAAGCGAAAAAAAAA-AAGGGGGATAGGTGCAGAGACTCAACGGAAGCTGTTCTAAAAAATGGGGTTGACTGCCTTTTTTGGTAAAGAAAGGAAAAGAAATCCTTCTATCGAATATCGAAACTCCATAAAGGATGAAGGATAAGCGTATATACACTATGTATACACAATGAAAAACTATCTCAAAAATGACAACCGAATCCGTATTTTTTTTTATGAAAAAAAAAAAAATTGTTATGAATCAATTCCAAGTTGAAAAAAGAATCGAATATTCATTGATCAAATCATTCACTCCATAGTCTGATCGATCTTTTCTTTTGAAAAACTGATTAATCGGACAAAAATAAAGATAGAGTCCCATTCTACATGTCAATATCAATACCGGCAACAATGAAATTTAAAGTAAGAGGAAAATCCGTCGACTTTAAAAATCGTGAGGGTTCAAG
>WM03
AGTGATAA--CTTT-CAAA--TTCAGA-GAAACCCTGGAATC--AAAAATGGGCAATCCT-GAGCCAAATCCT-GTTTTACAAGAACAAACAAGGGTTCAGAAAGCGAAAAAAAAA-AAGGGGGATAGGTGCAGAGACTCAACGGAAGCTGTTCTAAAAAATGGGGTTGACTGCCTTTTTTGGTAAAGAAAGGAAAAGAAATCCTTCTATCGAATATCGAAACTCCATAAAGGATGAAGGATAAGCGTATATACACTATGTATACACAATGAAAAACTATCTCAAAAATGACAACCGAATCCGTATTTTTTTTTATGAAAAAAAAAAAAATTGTTATGAATCAATTCCAAGTTGAAAAAAGAATCGAATATTCATTGATCAAATCATTCACTCCATAGTCTGATCGATCTTTTCTTTTGAAAAACTGATTAATCGGACAAAAATAAAGATAGAGTCCCATTCTACATGTCAATATCAATACCGGCAACAATGAAATTTAAAGTAAGAGGAAAATCCGTCGACTTTAAAAATCGTGAGGGTTCAAG
>WM12
AGTGATAA--CTTT-CAAA--TTCAGA-GAAACCCTGGAATC--AAAAATGGGCAATCCT-GAGCCAAATCCT-GTTTTACAAGAACAAACAAGGGTTCAGAAAGCGAAAAAAAAA-AAGGGGGATAGGTGCAGAGACTCAACGGAAGCTGTTCTAAAAAATGGGGTTGACTGCCTTTTTTGGTAAAGAAAGGAAAAGAAATCCTTCTATCGAATATCGAAACTCCATAAAGGATGAAGGATAAGCGTATATACACTATGTATACACAATGAAAAACTATCTCAAAAATGACAACCGAATCCGTATTTTTTTTTATGAAAAAAAAAAAAATTGTTATGAATCAATTCCAAGTTGAAAAAAGAATCGAATATTCATTGATCAAATCATTCACTCCATAGTCTGATCGATCTTTTCTTTTGAAAAACTGATTAATCGGACAAAAATAAAGATAGAGTCCCATTCTACATGTCAATATCAATACCGGCAACAATGAAATTTAAAGTAAGAGGAAAATCCGTCGACTTTAAAAATCGTGAGGGTTCAAG
>WM24
AGTGATAA--CTTT-CAAA--TTCAGA-GAAACCCTGGAATC--AAAAATGGGCAATCCT-GAGCCAAATCCT-GTTTTACAAGAACAAACAAGGGTTCAGAAAGCGAAAAAAAAA-AAGGGGGATAGGTGCAGAGACTCAACGGAAGCTGTTCTAAAAAATGGGGTTGACTGCCTTTTTTGGTAAAGAAAGGAAAAGAAATCCTTCTATCGAATATCGAAACTCCATAAAGGATGAAGGATAAGCGTATATACACTATGTATACACAATGAAAAACTATCTCAAAAATGACAACCGAATCCGTATTTTTTTTTATGAAAAAAAAAAAAATTGTTATGAATCAATTCCAAGTTGAAAAAAGAATCGAATATTCATTGATCAAATCATTCACTCCATAGTCTGATCGATCTTTTCTTTTGAAAAACTGATTAATCGGACAAAAATAAAGATAGAGTCCCATTCTACATGTCAATATCAATACCGGCAACAATGAAATTTAAAGTAAGAGGAAAATCCGTCGACTTTAAAAATCGTGAGGGTTCAAG
>YR21
AGTGATAA--CTTT-CAAA--TTCAGA-GAAACCCTGGAATC--AAAAATGGGCAATCCT-GAGCCAAATCCT-GTTTTACAAGAACAAACAAGGGTTCAGAAAGCGAAAAAAAAA-AAGGGGGATAGGTGCAGAGACTCAACGGAAGCTGTTCTAAAAAATGGGGTTGACTGCCTTTTTTGGTAAAGAAAGGAAAAGAAATCCTTCTATCGAATATCGAAACTCCATAAAGGATGAAGGATAAGCGTATATACACTATGTATACACAATGAAAAACTATCTCAAAAATGACAACCGAATCCGTATTTTTTTTTATGAAAAAAAAAAAAATTGTTATGAATCAATTCCAAGTTGAAAAAAGAATCGAATATTCATTGATCAAATCATTCACTCCATAGTCTGATCGATCTTTTCTTTTGAAAAACTGATTAATCGGACAAAAATAAAGATAGAGTCCCATTCTACATGTCAATATCAATACCGGCAACAATGAAATTTAAAGTAAGAGGAAAATCCGTCGACTTTAAAAATCGTGAGGGTTCAAG
>YR25
AGTGATAA--CTTT-CAAA--TTCAGA-GAAACCCTGGAATC--AAAAATGGGCAATCCT-GAGCCAAATCCT-GTTTTACAAGAACAAACAAGGGTTCAGAAAGCGAAAAAAAAA-AAGGGGGATAGGTGCAGAGACTCAACGGAAGCTGTTCTAAAAAATGGGGTTGACTGCCTTTTTTGGTAAAGAAAGGAAAAGAAATCCTTCTATCGAATATCGAAACTCCATAAAGGATGAAGGATAAGCGTATATACACTATGTATACACAATGAAAAACTATCTCAAAAATGACAACCGAATCCGTATTTTTTTTTATGAAAAAAAAAAAAATTGTTATGAATCAATTCCAAGTTGAAAAAAGAATCGAATATTCATTGATCAAATCATTCACTCCATAGTCTGATCGATCTTTTCTTTTGAAAAACTGATTAATCGGACAAAAATAAAGATAGAGTCCCATTCTACATGTCAATATCAATACCGGCAACAATGAAATTTAAAGTAAGAGGAAAATCCGTCGACTTTAAAAATCGTGAGGGTTCAAG
>BS03
AGTGATAA--CTTT-CAAA--TTCAGA-GAAACCCTGGAATC--AAAAATGGGCAATCCT-GAGCCAAATCCT-GTTTTACAAGAACAAACAAGGGTTCAGAAAGCGAAAAAAAAA-AAGGGGGATAGGTGCAGAGACTCAACGGAAGCTGTTCTAAAAAATGGGGTTGACTGCCTTTTTTGGTAAAGAAAGGAAAAGAAATCCTTCTATCGAATATCGAAACTCCATAAAGGATGAAGGATAAGCGTATATACACTATGTATACACAATGAAAAACTATCTCAAAAATGACAACCGAATCCGTATTTTTTTTTATGAAAAAAAAAAAAATTGTTATGAATCAATTCCAAGTTGAAAAAAGAATCGAATATTCATTGATCAAATCATTCACTCCATAGTCTGATCGATCTTTTCTTTTGAAAAACTGATTAATCGGACAAAAATAAAGATAGAGTCCCATTCTACATGTCAATATCAATACCGGCAACAATGAAATTTAAAGTAAGAGGAAAATCCGTCGACTTTAAAAATCGTGAGGGTTCAAG
>LD03
AGTGATAA--CTTT-CAAA--TTCAGA-GAAACCCTGGAATC--AAAAATGGGCAATCCT-GAGCCAAATCCT-GTTTTACAAGAACAAACAAGGGTTCAGAAAGCGAAAAAAAAA-AAGGGGGATAGGTGCAGAGACTCAACGGAAGCTGTTCTAAAAAATGGGGTTGACTGCCTTTTTTGGTAAAGAAAGGAAAAGAAATCCTTCTATCGAATATCGAAACTCCATAAAGGATGAAGGATAAGCGTATATACACTATGTATACACAATGAAAAACTATCTCAAAAATGACAACCGAATCCGTATTTTTTTTTATGAAAAAAAAAAAAATTGTTATGAATCAATTCCAAGTTGAAAAAAGAATCGAATATTCATTGATCAAATCATTCACTCCATAGTCTGATCGATCTTTTCTTTTGAAAAACTGATTAATCGGACAAAAATAAAGATAGAGTCCCATTCTACATGTCAATATCAATACCGGCAACAATGAAATTTAAAGTAAGAGGAAAATCCGTCGACTTTAAAAATCGTGAGGGTTCAAG
>LD08
AGTGATAA--CTTT-CAAA--TTCAGA-GAAACCCTGGAATC--AAAAATGGGCAATCCT-GAGCCAAATCCT-GTTTTACAAGAACAAACAAGGGTTCAGAAAGCGAAAAAAAAA-AAGGGGGATAGGTGCAGAGACTCAACGGAAGCTGTTCTAAAAAATGGGGTTGACTGCCTTTTTTGGTAAAGAAAGGAAAAGAAATCCTTCTATCGAATATCGAAACTCCATAAAGGATGAAGGATAAGCGTATATACACTATGTATACACAATGAAAAACTATCTCAAAAATGACAACCGAATCCGTATTTTTTTTTATGAAAAAAAAAAAAATTGTTATGAATCAATTCCAAGTTGAAAAAAGAATCGAATATTCATTGATCAAATCATTCACTCCATAGTCTGATCGATCTTTTCTTTTGAAAAACTGATTAATCGGACAAAAATAAAGATAGAGTCCCATTCTACATGTCAATATCAATACCGGCAACAATGAAATTTAAAGTAAGAGGAAAATCCGTCGACTTTAAAAATCGTGAGGGTTCAAG
>LD09
AGTGATAA--CTTT-CAAA--TTCAGA-GAAACCCTGGAATC--AAAAATGGGCAATCCT-GAGCCAAATCCT-GTTTTACAAGAACAAACAAGGGTTCAGAAAGCGAAAAAAAAA-AAGGGGGATAGGTGCAGAGACTCAACGGAAGCTGTTCTAAAAAATGGGGTTGACTGCCTTTTTTGGTAAAGAAAGGAAAAGAAATCCTTCTATCGAATATCGAAACTCCATAAAGGATGAAGGATAAGCGTATATACACTATGTATACACAATGAAAAACTATCTCAAAAATGACAACCGAATCCGTATTTTTTTTTATGAAAAAAAAAAAAATTGTTATGAATCAATTCCAAGTTGAAAAAAGAATCGAATATTCATTGATCAAATCATTCACTCCATAGTCTGATCGATCTTTTCTTTTGAAAAACTGATTAATCGGACAAAAATAAAGATAGAGTCCCATTCTACATGTCAATATCAATACCGGCAACAATGAAATTTAAAGTAAGAGGAAAATCCGTCGACTTTAAAAATCGTGAGGGTTCAAG
>LD12
AGTGATAA--CTTT-CAAA--TTCAGA-GAAACCCTGGAATC--AAAAATGGGCAATCCT-GAGCCAAATCCT-GTTTTACAAGAACAAACAAGGGTTCAGAAAGCGAAAAAAAAA-AAGGGGGATAGGTGCAGAGACTCAACGGAAGCTGTTCTAAAAAATGGGGTTGACTGCCTTTTTTGGTAAAGAAAGGAAAAGAAATCCTTCTATCGAATATCGAAACTCCATAAAGGATGAAGGATAAGCGTATATACACTATGTATACACAATGAAAAACTATCTCAAAAATGACAACCGAATCCGTATTTTTTTTTATGAAAAAAAAAAAAATTGTTATGAATCAATTCCAAGTTGAAAAAAGAATCGAATATTCATTGATCAAATCATTCACTCCATAGTCTGATCGATCTTTTCTTTTGAAAAACTGATTAATCGGACAAAAATAAAGATAGAGTCCCATTCTACATGTCAATATCAATACCGGCAACAATGAAATTTAAAGTAAGAGGAAAATCCGTCGACTTTAAAAATCGTGAGGGTTCAAG
>LD13
AGTGATAA--CTTT-CAAA--TTCAGA-GAAACCCTGGAATC--AAAAATGGGCAATCCT-GAGCCAAATCCT-GTTTTACAAGAACAAACAAGGGTTCAGAAAGCGAAAAAAAAA-AAGGGGGATAGGTGCAGAGACTCAACGGAAGCTGTTCTAAAAAATGGGGTTGACTGCCTTTTTTGGTAAAGAAAGGAAAAGAAATCCTTCTATCGAATATCGAAACTCCATAAAGGATGAAGGATAAGCGTATATACACTATGTATACACAATGAAAAACTATCTCAAAAATGACAACCGAATCCGTATTTTTTTTTATGAAAAAAAAAAAAATTGTTATGAATCAATTCCAAGTTGAAAAAAGAATCGAATATTCATTGATCAAATCATTCACTCCATAGTCTGATCGATCTTTTCTTTTGAAAAACTGATTAATCGGACAAAAATAAAGATAGAGTCCCATTCTACATGTCAATATCAATACCGGCAACAATGAAATTTAAAGTAAGAGGAAAATCCGTCGACTTTAAAAATCGTGAGGGTTCAAG
>TL04
AGTGATAA--CTTT-CAAA--TTCAGA-GAAACCCTGGAATC--AAAAATGGGCAATCCT-GAGCCAAATCCT-GTTTTACAAGAACAAACAAGGGTTCAGAAAGCGAAAAAAAAA-AAGGGGGATAGGTGCAGAGACTCAACGGAAGCTGTTCTAAAAAATGGGGTTGACTGCCTTTTTTGGTAAAGAAAGGAAAAGAAATCCTTCTATCGAATATCGAAACTCCATAAAGGATGAAGGATAAGCGTATATACACTATGTATACACAATGAAAAACTATCTCAAAAATGACAACCGAATCCGTATTTTTTTTTATGAAAAAAAAAAAAATTGTTATGAATCAATTCCAAGTTGAAAAAAGAATCGAATATTCATTGATCAAATCATTCACTCCATAGTCTGATCGATCTTTTCTTTTGAAAAACTGATTAATCGGACAAAAATAAAGATAGAGTCCCATTCTACATGTCAATATCAATACCGGCAACAATGAAATTTAAAGTAAGAGGAAAATCCGTCGACTTTAAAAATCGTGAGGGTTCAAG
>TL05
AGTGATAA--CTTT-CAAA--TTCAGA-GAAACCCTGGAATC--AAAAATGGGCAATCCT-GAGCCAAATCCT-GTTTTACAAGAACAAACAAGGGTTCAGAAAGCGAAAAAAAAA-AAGGGGGATAGGTGCAGAGACTCAACGGAAGCTGTTCTAAAAAATGGGGTTGACTGCCTTTTTTGGTAAAGAAAGGAAAAGAAATCCTTCTATCGAATATCGAAACTCCATAAAGGATGAAGGATAAGCGTATATACACTATGTATACACAATGAAAAACTATCTCAAAAATGACAACCGAATCCGTATTTTTTTTTATGAAAAAAAAAAAAATTGTTATGAATCAATTCCAAGTTGAAAAAAGAATCGAATATTCATTGATCAAATCATTCACTCCATAGTCTGATCGATCTTTTCTTTTGAAAAACTGATTAATCGGACAAAAATAAAGATAGAGTCCCATTCTACATGTCAATATCAATACCGGCAACAATGAAATTTAAAGTAAGAGGAAAATCCGTCGACTTTAAAAATCGTGAGGGTTCAAG
>TL06
AGTGATAA--CTTT-CAAA--TTCAGA-GAAACCCTGGAATC--AAAAATGGGCAATCCT-GAGCCAAATCCT-GTTTTACAAGAACAAACAAGGGTTCAGAAAGCGAAAAAAAAA-AAGGGGGATAGGTGCAGAGACTCAACGGAAGCTGTTCTAAAAAATGGGGTTGACTGCCTTTTTTGGTAAAGAAAGGAAAAGAAATCCTTCTATCGAATATCGAAACTCCATAAAGGATGAAGGATAAGCGTATATACACTATGTATACACAATGAAAAACTATCTCAAAAATGACAACCGAATCCGTATTTTTTTTTATGAAAAAAAAAAAAATTGTTATGAATCAATTCCAAGTTGAAAAAAGAATCGAATATTCATTGATCAAATCATTCACTCCATAGTCTGATCGATCTTTTCTTTTGAAAAACTGATTAATCGGACAAAAATAAAGATAGAGTCCCATTCTACATGTCAATATCAATACCGGCAACAATGAAATTTAAAGTAAGAGGAAAATCCGTCGACTTTAAAAATCGTGAGGGTTCAAG
>TL07
AGTGATAA--CTTT-CAAA--TTCAGA-GAAACCCTGGAATC--AAAAATGGGCAATCCT-GAGCCAAATCCT-GTTTTACAAGAACAAACAAGGGTTCAGAAAGCGAAAAAAAAA-AAGGGGGATAGGTGCAGAGACTCAACGGAAGCTGTTCTAAAAAATGGGGTTGACTGCCTTTTTTGGTAAAGAAAGGAAAAGAAATCCTTCTATCGAATATCGAAACTCCATAAAGGATGAAGGATAAGCGTATATACACTATGTATACACAATGAAAAACTATCTCAAAAATGACAACCGAATCCGTATTTTTTTTTATGAAAAAAAAAAAAATTGTTATGAATCAATTCCAAGTTGAAAAAAGAATCGAATATTCATTGATCAAATCATTCACTCCATAGTCTGATCGATCTTTTCTTTTGAAAAACTGATTAATCGGACAAAAATAAAGATAGAGTCCCATTCTACATGTCAATATCAATACCGGCAACAATGAAATTTAAAGTAAGAGGAAAATCCGTCGACTTTAAAAATCGTGAGGGTTCAAG
>TL09
AGTGATAA--CTTT-CAAA--TTCAGA-GAAACCCTGGAATC--AAAAATGGGCAATCCT-GAGCCAAATCCT-GTTTTACAAGAACAAACAAGGGTTCAGAAAGCGAAAAAAAAA-AAGGGGGATAGGTGCAGAGACTCAACGGAAGCTGTTCTAAAAAATGGGGTTGACTGCCTTTTTTGGTAAAGAAAGGAAAAGAAATCCTTCTATCGAATATCGAAACTCCATAAAGGATGAAGGATAAGCGTATATACACTATGTATACACAATGAAAAACTATCTCAAAAATGACAACCGAATCCGTATTTTTTTTTATGAAAAAAAAAAAAATTGTTATGAATCAATTCCAAGTTGAAAAAAGAATCGAATATTCATTGATCAAATCATTCACTCCATAGTCTGATCGATCTTTTCTTTTGAAAAACTGATTAATCGGACAAAAATAAAGATAGAGTCCCATTCTACATGTCAATATCAATACCGGCAACAATGAAATTTAAAGTAAGAGGAAAATCCGTCGACTTTAAAAATCGTGAGGGTTCAAG
>TL10
AGTGATAA--CTTT-CAAA--TTCAGA-GAAACCCTGGAATC--AAAAATGGGCAATCCT-GAGCCAAATCCT-GTTTTACAAGAACAAACAAGGGTTCAGAAAGCGAAAAAAAAA-AAGGGGGATAGGTGCAGAGACTCAACGGAAGCTGTTCTAAAAAATGGGGTTGACTGCCTTTTTTGGTAAAGAAAGGAAAAGAAATCCTTCTATCGAATATCGAAACTCCATAAAGGATGAAGGATAAGCGTATATACACTATGTATACACAATGAAAAACTATCTCAAAAATGACAACCGAATCCGTATTTTTTTTTATGAAAAAAAAAAAAATTGTTATGAATCAATTCCAAGTTGAAAAAAGAATCGAATATTCATTGATCAAATCATTCACTCCATAGTCTGATCGATCTTTTCTTTTGAAAAACTGATTAATCGGACAAAAATAAAGATAGAGTCCCATTCTACATGTCAATATCAATACCGGCAACAATGAAATTTAAAGTAAGAGGAAAATCCGTCGACTTTAAAAATCGTGAGGGTTCAAG
>TL12
AGTGATAA--CTTT-CAAA--TTCAGA-GAAACCCTGGAATC--AAAAATGGGCAATCCT-GAGCCAAATCCT-GTTTTACAAGAACAAACAAGGGTTCAGAAAGCGAAAAAAAAA-AAGGGGGATAGGTGCAGAGACTCAACGGAAGCTGTTCTAAAAAATGGGGTTGACTGCCTTTTTTGGTAAAGAAAGGAAAAGAAATCCTTCTATCGAATATCGAAACTCCATAAAGGATGAAGGATAAGCGTATATACACTATGTATACACAATGAAAAACTATCTCAAAAATGACAACCGAATCCGTATTTTTTTTTATGAAAAAAAAAAAAATTGTTATGAATCAATTCCAAGTTGAAAAAAGAATCGAATATTCATTGATCAAATCATTCACTCCATAGTCTGATCGATCTTTTCTTTTGAAAAACTGATTAATCGGACAAAAATAAAGATAGAGTCCCATTCTACATGTCAATATCAATACCGGCAACAATGAAATTTAAAGTAAGAGGAAAATCCGTCGACTTTAAAAATCGTGAGGGTTCAAG
>TL13
AGTGATAA--CTTT-CAAA--TTCAGA-GAAACCCTGGAATC--AAAAATGGGCAATCCT-GAGCCAAATCCT-GTTTTACAAGAACAAACAAGGGTTCAGAAAGCGAAAAAAAAA-AAGGGGGATAGGTGCAGAGACTCAACGGAAGCTGTTCTAAAAAATGGGGTTGACTGCCTTTTTTGGTAAAGAAAGGAAAAGAAATCCTTCTATCGAATATCGAAACTCCATAAAGGATGAAGGATAAGCGTATATACACTATGTATACACAATGAAAAACTATCTCAAAAATGACAACCGAATCCGTATTTTTTTTTATGAAAAAAAAAAAAATTGTTATGAATCAATTCCAAGTTGAAAAAAGAATCGAATATTCATTGATCAAATCATTCACTCCATAGTCTGATCGATCTTTTCTTTTGAAAAACTGATTAATCGGACAAAAATAAAGATAGAGTCCCATTCTACATGTCAATATCAATACCGGCAACAATGAAATTTAAAGTAAGAGGAAAATCCGTCGACTTTAAAAATCGTGAGGGTTCAAG
>TL22
AGTGATAA--CTTT-CAAA--TTCAGA-GAAACCCTGGAATC--AAAAATGGGCAATCCT-GAGCCAAATCCT-GTTTTACAAGAACAAACAAGGGTTCAGAAAGCGAAAAAAAAA-AAGGGGGATAGGTGCAGAGACTCAACGGAAGCTGTTCTAAAAAATGGGGTTGACTGCCTTTTTTGGTAAAGAAAGGAAAAGAAATCCTTCTATCGAATATCGAAACTCCATAAAGGATGAAGGATAAGCGTATATACACTATGTATACACAATGAAAAACTATCTCAAAAATGACAACCGAATCCGTATTTTTTTTTATGAAAAAAAAAAAAATTGTTATGAATCAATTCCAAGTTGAAAAAAGAATCGAATATTCATTGATCAAATCATTCACTCCATAGTCTGATCGATCTTTTCTTTTGAAAAACTGATTAATCGGACAAAAATAAAGATAGAGTCCCATTCTACATGTCAATATCAATACCGGCAACAATGAAATTTAAAGTAAGAGGAAAATCCGTCGACTTTAAAAATCGTGAGGGTTCAAG
>TL25
AGTGATAA--CTTT-CAAA--TTCAGA-GAAACCCTGGAATC--AAAAATGGGCAATCCT-GAGCCAAATCCT-GTTTTACAAGAACAAACAAGGGTTCAGAAAGCGAAAAAAAAA-AAGGGGGATAGGTGCAGAGACTCAACGGAAGCTGTTCTAAAAAATGGGGTTGACTGCCTTTTTTGGTAAAGAAAGGAAAAGAAATCCTTCTATCGAATATCGAAACTCCATAAAGGATGAAGGATAAGCGTATATACACTATGTATACACAATGAAAAACTATCTCAAAAATGACAACCGAATCCGTATTTTTTTTTATGAAAAAAAAAAAAATTGTTATGAATCAATTCCAAGTTGAAAAAAGAATCGAATATTCATTGATCAAATCATTCACTCCATAGTCTGATCGATCTTTTCTTTTGAAAAACTGATTAATCGGACAAAAATAAAGATAGAGTCCCATTCTACATGTCAATATCAATACCGGCAACAATGAAATTTAAAGTAAGAGGAAAATCCGTCGACTTTAAAAATCGTGAGGGTTCAAG
>CH07
AGTGATAA--CTTT-CAAA--TTCAGA-GAAACCCTGGAATC--AAAAATGGGCAATCCT-GAGCCAAATCCT-GTTTTACAAGAACAAACAAGGGTTCAGAAAGCGAAAAAAAAA-AAGGGGGATAGGTGCAGAGACTCAACGGAAGCTGTTCTAAAAAATGGGGTTGACTGCCTTTTTTGGTAAAGAAAGGAAAAGAAATCCTTCTATCGAATATCGAAACTCCATAAAGGATGAAGGATAAGCGTATATACACTATGTATACACAATGAAAAACTATCTCAAAAATGACAACCGAATCCGTATTTTTTTTTATGAAAAAAAAAAAAATTGTTATGAATCAATTCCAAGTTGAAAAAAGAATCGAATATTCATTGATCAAATCATTCACTCCATAGTCTGATCGATCTTTTCTTTTGAAAAACTGATTAATCGGACAAAAATAAAGATAGAGTCCCATTCTACATGTCAATATCAATACCGGCAACAATGAAATTTAAAGTAAGAGGAAAATCCGTCGACTTTAAAAATCGTGAGGGTTCAAG
>JG02
AGTGATAA--CTTT-CAAA--TTCAGA-GAAACCCTGGAATC--AAAAATGGGCAATCCT-GAGCCAAATCCT-GTTTTACAAGAACAAACAAGGGTTCAGAAAGCGAAAAAAAAA-AAGGGGGATAGGTGCAGAGACTCAACGGAAGCTGTTCTAAAAAATGGGGTTGACTGCCTTTTTTGGTAAAGAAAGGAAAAGAAATCCTTCTATCGAATATCGAAACTCCATAAAGGATGAAGGATAAGCGTATATACACTATGTATACACAATGAAAAACTATCTCAAAAATGACAACCGAATCCGTATTTTTTTTTATGAAAAAAAAAAAAATTGTTATGAATCAATTCCAAGTTGAAAAAAGAATCGAATATTCATTGATCAAATCATTCACTCCATAGTCTGATCGATCTTTTCTTTTGAAAAACTGATTAATCGGACAAAAATAAAGATAGAGTCCCATTCTACATGTCAATATCAATACCGGCAACAATGAAATTTAAAGTAAGAGGAAAATCCGTCGACTTTAAAAATCGTGAGGGTTCAAG
>PW15
AGTGATAA--CTTT-CAAA--TTCAGA-GAAACCCTGGAATC--AAAAATGGGCAATCCT-GAGCCAAATCCT-GTTTTACAAGAACAAACAAGGGTTCAGAAAGCGAAAAAAAAA-AAGGGGGATAGGTGCAGAGACTCAACGGAAGCTGTTCTAAAAAATGGGGTTGACTGCCTTTTTTGGTAAAGAAAGGAAAAGAAATCCTTCTATCGAATATCGAAACTCCATAAAGGATGAAGGATAAGCGTATATACACTATGTATACACAATGAAAAACTATCTCAAAAATGACAACCGAATCCGTATTTTTTTTTATGAAAAAAAAAAAAATTGTTATGAATCAATTCCAAGTTGAAAAAAGAATCGAATATTCATTGATCAAATCATTCACTCCATAGTCTGATCGATCTTTTCTTTTGAAAAACTGATTAATCGGACAAAAATAAAGATAGAGTCCCATTCTACATGTCAATATCAATACCGGCAACAATGAAATTTAAAGTAAGAGGAAAATCCGTCGACTTTAAAAATCGTGAGGGTTCAAG
>YF02
AGTGATAA--CTTT-CAAA--TTCAGA-GAAACCCTGGAATC--AAAAATGGGCAATCCT-GAGCCAAATCCT-GTTTTACAAGAACAAACAAGGGTTCAGAAAGCGAAAAAAAAA-AAGGGGGATAGGTGCAGAGACTCAACGGAAGCTGTTCTAAAAAATGGGGTTGACTGCCTTTTTTGGTAAAGAAAGGAAAAGAAATCCTTCTATCGAATATCGAAACTCCATAAAGGATGAAGGATAAGCGTATATACACTATGTATACACAATGAAAAACTATCTCAAAAATGACAACCGAATCCGTATTTTTTTTTATGAAAAAAAAAAAAATTGTTATGAATCAATTCCAAGTTGAAAAAAGAATCGAATATTCATTGATCAAATCATTCACTCCATAGTCTGATCGATCTTTTCTTTTGAAAAACTGATTAATCGGACAAAAATAAAGATAGAGTCCCATTCTACATGTCAATATCAATACCGGCAACAATGAAATTTAAAGTAAGAGGAAAATCCGTCGACTTTAAAAATCGTGAGGGTTCAAG
>YF03
AGTGATAA--CTTT-CAAA--TTCAGA-GAAACCCTGGAATC--AAAAATGGGCAATCCT-GAGCCAAATCCT-GTTTTACAAGAACAAACAAGGGTTCAGAAAGCGAAAAAAAAA-AAGGGGGATAGGTGCAGAGACTCAACGGAAGCTGTTCTAAAAAATGGGGTTGACTGCCTTTTTTGGTAAAGAAAGGAAAAGAAATCCTTCTATCGAATATCGAAACTCCATAAAGGATGAAGGATAAGCGTATATACACTATGTATACACAATGAAAAACTATCTCAAAAATGACAACCGAATCCGTATTTTTTTTTATGAAAAAAAAAAAAATTGTTATGAATCAATTCCAAGTTGAAAAAAGAATCGAATATTCATTGATCAAATCATTCACTCCATAGTCTGATCGATCTTTTCTTTTGAAAAACTGATTAATCGGACAAAAATAAAGATAGAGTCCCATTCTACATGTCAATATCAATACCGGCAACAATGAAATTTAAAGTAAGAGGAAAATCCGTCGACTTTAAAAATCGTGAGGGTTCAAG

H36
>CH22
AGTGATAA--CTTT-CAAA--TTCAGA-GAAACCCTGGAATC--AAAAATGGGCAATCCT
-GAGCCAAATCCT-GTTTTACAAGAACAAACAAGGGTTCAGAAAGCGAAAAAAAAA-AAG
GGGGATAGGTGCAGAGACTCAACGGAAGCTGTTCTAAAAAATGGGGTTGACTGCCTTTTT
TGGTAAAGAAAGGAAAAGAAATCCTTCTATCGAATATCGAAACTCCATAAAGGATGAAGG
ATAAGCGTATATACACTATGTATACACAATGAAAAACTATCTCAAAAATGACAACCGAAT
CCGTATTTTTTTTTATGAAAAAAAAAAAAATTGTTATGAATCAATTCCAAGTTGAAAAAA
GAATCGAATATTCATTGATCAAATCATTCACTCCATAGTCTGATCGATCTTTTCTTTTGA
AAAACTGATTAATCGGACAAGAATAAAGATAGAGTCCCATTCTACATGTCAATATCAATA
CCGGCAACAATGAAATTTAGAGTAAGAGGAAAATCCGTCGACTTTAAAAATCGTGAGGGT
TCAAG
>WY10
AGTGATAA--CTTT-CAAA--TTCAGA-GAAACCCTGGAATC--AAAAATGGGCAATCCT
-GAGCCAAATCCT-GTTTTACAAGAACAAACAAGGGTTCAGAAAGCGAAAAAAAAA-AAG
GGGGATAGGTGCAGAGACTCAACGGAAGCTGTTCTAAAAAATGGGGTTGACTGCCTTTTT
TGGTAAAGAAAGGAAAAGAAATCCTTCTATCGAATATCGAAACTCCATAAAGGATGAAGG
ATAAGCGTATATACACTATGTATACACAATGAAAAACTATCTCAAAAATGACAACCGAAT
CCGTATTTTTTTTTATGAAAAAAAAAAAAATTGTTATGAATCAATTCCAAGTTGAAAAAA
GAATCGAATATTCATTGATCAAATCATTCACTCCATAGTCTGATCGATCTTTTCTTTTGA
AAAACTGATTAATCGGACAAGAATAAAGATAGAGTCCCATTCTACATGTCAATATCAATA
CCGGCAACAATGAAATTTAGAGTAAGAGGAAAATCCGTCGACTTTAAAAATCGTGAGGGT
TCAAG


H37
>HD02
AGTGATAA--CTTT-CAAA--TTCAGA-GAAACCCTGGAATC--AAAAATGGGCAATCCT
-GAGCCAAATCCT-GTTTTACAAGAACAAACAAGGGTTCAGAAAGCGAAAAAAAAAAAAG
GGGGATAGGGGCAAAAACTCAACGGAAGCTGTTCTAAAAAATGGGGTTGACTGCCTTTTT
TGGTAAAAAAAGGAAAAAAAATCCTTCTATCGAATATCGAAACTCCATAAAGGATGAAGG
ATAAGCGTATATACACTATGTATACACAATGAAAAACTATCTCAAAAATGACAACCGAAT
CCGTATTTTTTTTTATGAAAAAAAAAAAAATTGTTATGAATCAATTCCAAGTTGAAAAAA
AAATCAAATATTCTTTGATCAAATCATTCCCTCCATAGTCTGATCGATCTTTTCTTTTGA
AAAACTGATTAATCGGACAAAAATAAAAATAAAGTCCCATTCTACATGTCAATATCAATA
CCGGCAACAATGAAATTTAAAGTAAAAGGAAAATCCGTCAACTTTAAAAATCGGGAGGGT
TCAAG
>HD08
AGTGATAA--CTTT-CAAA--TTCAGA-GAAACCCTGGAATC--AAAAATGGGCAATCCT
-GAGCCAAATCCT-GTTTTACAAGAACAAACAAGGGTTCAGAAAGCGAAAAAAAAAAAAG
GGGGATAGGGGCAAAAACTCAACGGAAGCTGTTCTAAAAAATGGGGTTGACTGCCTTTTT
TGGTAAAAAAAGGAAAAAAAATCCTTCTATCGAATATCGAAACTCCATAAAGGATGAAGG
ATAAGCGTATATACACTATGTATACACAATGAAAAACTATCTCAAAAATGACAACCGAAT
CCGTATTTTTTTTTATGAAAAAAAAAAAAATTGTTATGAATCAATTCCAAGTTGAAAAAA
AAATCAAATATTCTTTGATCAAATCATTCCCTCCATAGTCTGATCGATCTTTTCTTTTGA
AAAACTGATTAATCGGACAAAAATAAAAATAAAGTCCCATTCTACATGTCAATATCAATA
CCGGCAACAATGAAATTTAAAGTAAAAGGAAAATCCGTCAACTTTAAAAATCGGGAGGGT
TCAAG
>HD13
AGTGATAA--CTTT-CAAA--TTCAGA-GAAACCCTGGAATC--AAAAATGGGCAATCCT
-GAGCCAAATCCT-GTTTTACAAGAACAAACAAGGGTTCAGAAAGCGAAAAAAAAAAAAG
GGGGATAGGGGCAAAAACTCAACGGAAGCTGTTCTAAAAAATGGGGTTGACTGCCTTTTT
TGGTAAAAAAAGGAAAAAAAATCCTTCTATCGAATATCGAAACTCCATAAAGGATGAAGG
ATAAGCGTATATACACTATGTATACACAATGAAAAACTATCTCAAAAATGACAACCGAAT
CCGTATTTTTTTTTATGAAAAAAAAAAAAATTGTTATGAATCAATTCCAAGTTGAAAAAA
AAATCAAATATTCTTTGATCAAATCATTCCCTCCATAGTCTGATCGATCTTTTCTTTTGA
AAAACTGATTAATCGGACAAAAATAAAAATAAAGTCCCATTCTACATGTCAATATCAATA
CCGGCAACAATGAAATTTAAAGTAAAAGGAAAATCCGTCAACTTTAAAAATCGGGAGGGT
TCAAG


H38
>HD03
AGTGATAA--CTTT-CAAA--TTCAGA-GAAACCCTGGAATC--AAAAATGGGCAATCCT
-GAGCCAAATCCT-GTTTTACAAGAACAAACAAGGGTTCAGAAAGCGAAAAAAAAAAAAG
GGGGATAGGGGCAAAAACTCAACGGAAGCTGTTCTAAAAAATGGGGTTGACTGCCTTTTT
TGGTAAAAAAAGGAAAAAAAATCCTTCTATCGAATATCGAAACTCCATAAAGGATGAAGG
ATAAGCGTATATACACTATGTATACACAATGAAAAACTATCTCAAAAATGACAACCGAAT
CCGTATTTTTTTTTATGAAAAAAAAAAAAATTGTTATGAATCAATTCCAAGTTGAAAAAA
AAATCGAATATTCTTTGATCAAATCATTCCCTCCATAGTCTGATCGATCTTTTCTTTTGA
AAAACTGATTAATCGGACAAAAATAAAAATAGAGTCCCATTCTACATGTCAATATCAATA
CCGGCAACAATGAAATTTAAAGTAAAAGGAAAATCCGTCAACTTTAAAAATCGGGAGGGT
TCAAG
>HD09
AGTGATAA--CTTT-CAAA--TTCAGA-GAAACCCTGGAATC--AAAAATGGGCAATCCT
-GAGCCAAATCCT-GTTTTACAAGAACAAACAAGGGTTCAGAAAGCGAAAAAAAAAAAAG
GGGGATAGGGGCAAAAACTCAACGGAAGCTGTTCTAAAAAATGGGGTTGACTGCCTTTTT
TGGTAAAAAAAGGAAAAAAAATCCTTCTATCGAATATCGAAACTCCATAAAGGATGAAGG
ATAAGCGTATATACACTATGTATACACAATGAAAAACTATCTCAAAAATGACAACCGAAT
CCGTATTTTTTTTTATGAAAAAAAAAAAAATTGTTATGAATCAATTCCAAGTTGAAAAAA
AAATCGAATATTCTTTGATCAAATCATTCCCTCCATAGTCTGATCGATCTTTTCTTTTGA
AAAACTGATTAATCGGACAAAAATAAAAATAGAGTCCCATTCTACATGTCAATATCAATA
CCGGCAACAATGAAATTTAAAGTAAAAGGAAAATCCGTCAACTTTAAAAATCGGGAGGGT
TCAAG
>HD11
AGTGATAA--CTTT-CAAA--TTCAGA-GAAACCCTGGAATC--AAAAATGGGCAATCCT
-GAGCCAAATCCT-GTTTTACAAGAACAAACAAGGGTTCAGAAAGCGAAAAAAAAAAAAG
GGGGATAGGGGCAAAAACTCAACGGAAGCTGTTCTAAAAAATGGGGTTGACTGCCTTTTT
TGGTAAAAAAAGGAAAAAAAATCCTTCTATCGAATATCGAAACTCCATAAAGGATGAAGG
ATAAGCGTATATACACTATGTATACACAATGAAAAACTATCTCAAAAATGACAACCGAAT
CCGTATTTTTTTTTATGAAAAAAAAAAAAATTGTTATGAATCAATTCCAAGTTGAAAAAA
AAATCGAATATTCTTTGATCAAATCATTCCCTCCATAGTCTGATCGATCTTTTCTTTTGA
AAAACTGATTAATCGGACAAAAATAAAAATAGAGTCCCATTCTACATGTCAATATCAATA
CCGGCAACAATGAAATTTAAAGTAAAAGGAAAATCCGTCAACTTTAAAAATCGGGAGGGT
TCAAG
>HD14
AGTGATAA--CTTT-CAAA--TTCAGA-GAAACCCTGGAATC--AAAAATGGGCAATCCT
-GAGCCAAATCCT-GTTTTACAAGAACAAACAAGGGTTCAGAAAGCGAAAAAAAAAAAAG
GGGGATAGGGGCAAAAACTCAACGGAAGCTGTTCTAAAAAATGGGGTTGACTGCCTTTTT
TGGTAAAAAAAGGAAAAAAAATCCTTCTATCGAATATCGAAACTCCATAAAGGATGAAGG
ATAAGCGTATATACACTATGTATACACAATGAAAAACTATCTCAAAAATGACAACCGAAT
CCGTATTTTTTTTTATGAAAAAAAAAAAAATTGTTATGAATCAATTCCAAGTTGAAAAAA
AAATCGAATATTCTTTGATCAAATCATTCCCTCCATAGTCTGATCGATCTTTTCTTTTGA
AAAACTGATTAATCGGACAAAAATAAAAATAGAGTCCCATTCTACATGTCAATATCAATA
CCGGCAACAATGAAATTTAAAGTAAAAGGAAAATCCGTCAACTTTAAAAATCGGGAGGGT
TCAAG
>HD22
AGTGATAA--CTTT-CAAA--TTCAGA-GAAACCCTGGAATC--AAAAATGGGCAATCCT
-GAGCCAAATCCT-GTTTTACAAGAACAAACAAGGGTTCAGAAAGCGAAAAAAAAAAAAG
GGGGATAGGGGCAAAAACTCAACGGAAGCTGTTCTAAAAAATGGGGTTGACTGCCTTTTT
TGGTAAAAAAAGGAAAAAAAATCCTTCTATCGAATATCGAAACTCCATAAAGGATGAAGG
ATAAGCGTATATACACTATGTATACACAATGAAAAACTATCTCAAAAATGACAACCGAAT
CCGTATTTTTTTTTATGAAAAAAAAAAAAATTGTTATGAATCAATTCCAAGTTGAAAAAA
AAATCGAATATTCTTTGATCAAATCATTCCCTCCATAGTCTGATCGATCTTTTCTTTTGA
AAAACTGATTAATCGGACAAAAATAAAAATAGAGTCCCATTCTACATGTCAATATCAATA
CCGGCAACAATGAAATTTAAAGTAAAAGGAAAATCCGTCAACTTTAAAAATCGGGAGGGT
TCAAG
>HD23
AGTGATAA--CTTT-CAAA--TTCAGA-GAAACCCTGGAATC--AAAAATGGGCAATCCT
-GAGCCAAATCCT-GTTTTACAAGAACAAACAAGGGTTCAGAAAGCGAAAAAAAAAAAAG
GGGGATAGGGGCAAAAACTCAACGGAAGCTGTTCTAAAAAATGGGGTTGACTGCCTTTTT
TGGTAAAAAAAGGAAAAAAAATCCTTCTATCGAATATCGAAACTCCATAAAGGATGAAGG
ATAAGCGTATATACACTATGTATACACAATGAAAAACTATCTCAAAAATGACAACCGAAT
CCGTATTTTTTTTTATGAAAAAAAAAAAAATTGTTATGAATCAATTCCAAGTTGAAAAAA
AAATCGAATATTCTTTGATCAAATCATTCCCTCCATAGTCTGATCGATCTTTTCTTTTGA
AAAACTGATTAATCGGACAAAAATAAAAATAGAGTCCCATTCTACATGTCAATATCAATA
CCGGCAACAATGAAATTTAAAGTAAAAGGAAAATCCGTCAACTTTAAAAATCGGGAGGGT
TCAAG


H39
>XY12
AGTGATAA--CTTT-C--AAATTCAGA-GAAACCCTGGAATC--AAAAATGGGCAATCCT
-GAGCCAAATCCT-GTTTTACAAGAACAAACAAGGGTTCAGAAAGCGAAAAAAAAA-AAG
GGGGATAGGTGCAGAGACTCAACGGAAGCTGTTCTAAAAAATGGGGTTGACTGCCTTTTT
TGGTAAAAAAAGGAAAAAAAATCCTTCTATCGAATATCGAAACTCCATAAAGGATGAAGG
ATAAGCGTATATACACTATGTATACACAATGAAAAACTATCTCAAAAATGACAACCGAAT
CCGTATTTTTTTTTATGAAAAAAAAAAAAATTGTTATGAATCAATTCCAAGTTGAAAAAA
GAATCGAATATTCATTGATCAAATCATTCACTCCATAGTCTGATCGATCTTTTCTTTTGA
AAAACTGATTAATCGGACAAAAATAAAGATAGAGTCCCATTCTACATGTCAATATCAATA
CCGGCAACAATGAAATTTAAAGTAAGAGGAAAATCCGTCGACTTTAAAAATCGGGAGGGT
TCAAG
>XL07
AGTGATAA--CTTT-C--AAATTCAGA-GAAACCCTGGAATC--AAAAATGGGCAATCCT
-GAGCCAAATCCT-GTTTTACAAGAACAAACAAGGGTTCAGAAAGCGAAAAAAAAA-AAG
GGGGATAGGTGCAGAGACTCAACGGAAGCTGTTCTAAAAAATGGGGTTGACTGCCTTTTT
TGGTAAAAAAAGGAAAAAAAATCCTTCTATCGAATATCGAAACTCCATAAAGGATGAAGG
ATAAGCGTATATACACTATGTATACACAATGAAAAACTATCTCAAAAATGACAACCGAAT
CCGTATTTTTTTTTATGAAAAAAAAAAAAATTGTTATGAATCAATTCCAAGTTGAAAAAA
GAATCGAATATTCATTGATCAAATCATTCACTCCATAGTCTGATCGATCTTTTCTTTTGA
AAAACTGATTAATCGGACAAAAATAAAGATAGAGTCCCATTCTACATGTCAATATCAATA
CCGGCAACAATGAAATTTAAAGTAAGAGGAAAATCCGTCGACTTTAAAAATCGGGAGGGT
TCAAG
>WM05
AGTGATAA--CTTT-C--AAATTCAGA-GAAACCCTGGAATC--AAAAATGGGCAATCCT
-GAGCCAAATCCT-GTTTTACAAGAACAAACAAGGGTTCAGAAAGCGAAAAAAAAA-AAG
GGGGATAGGTGCAGAGACTCAACGGAAGCTGTTCTAAAAAATGGGGTTGACTGCCTTTTT
TGGTAAAAAAAGGAAAAAAAATCCTTCTATCGAATATCGAAACTCCATAAAGGATGAAGG
ATAAGCGTATATACACTATGTATACACAATGAAAAACTATCTCAAAAATGACAACCGAAT
CCGTATTTTTTTTTATGAAAAAAAAAAAAATTGTTATGAATCAATTCCAAGTTGAAAAAA
GAATCGAATATTCATTGATCAAATCATTCACTCCATAGTCTGATCGATCTTTTCTTTTGA
AAAACTGATTAATCGGACAAAAATAAAGATAGAGTCCCATTCTACATGTCAATATCAATA
CCGGCAACAATGAAATTTAAAGTAAGAGGAAAATCCGTCGACTTTAAAAATCGGGAGGGT
TCAAG


H40
>XY13
AGTGATAA--CTTT-CAAA--TTCAGA-GAAACCCTGGAATC--AAAAATGGGCAATCCT
-GAGCCAAATCCT-GTTTTACAAGAACAAACAAGGGTTCAGAAAGCGAAAAAAAAAAA-G
GGGGATAGGTGCAGAGACTCAACGGAAGCTGTTCTAAAAAATGGGGTTGACTGCCTTTTT
TGGTAAAAAAAGGAAAAAAAATCCTTCTATCGAATATCGAAACTCCATAAAGGATGAAGG
ATAAGCGTATATACACTATGTATACACAATGAAAAACTATCTCAAAAATGACAACCGAAT
CCGTATTTTTTTTTATGAAAAAAAAAAAAATTGTTATGAATCAATTCCAAGTTGAAAAAA
GAATCGAATATTCATTGATCAAATCATTCACTCCATAGTCTGATCGATCTTTTCTTTTGA
AAAACTGATTAATCGGACAAAAATAAAGATAGAGTCCCATTCTACATGTCAATATCAATA
CCGGCAACAATGAAATTTAAAGTAAGAGGAAAATCCGTCGACTTTAAAAATCGTGAGGGT
TCAAG
>TL23
AGTGATAA--CTTT-CAAA--TTCAGA-GAAACCCTGGAATC--AAAAATGGGCAATCCT
-GAGCCAAATCCT-GTTTTACAAGAACAAACAAGGGTTCAGAAAGCGAAAAAAAAAAA-G
GGGGATAGGTGCAGAGACTCAACGGAAGCTGTTCTAAAAAATGGGGTTGACTGCCTTTTT
TGGTAAAAAAAGGAAAAAAAATCCTTCTATCGAATATCGAAACTCCATAAAGGATGAAGG
ATAAGCGTATATACACTATGTATACACAATGAAAAACTATCTCAAAAATGACAACCGAAT
CCGTATTTTTTTTTATGAAAAAAAAAAAAATTGTTATGAATCAATTCCAAGTTGAAAAAA
GAATCGAATATTCATTGATCAAATCATTCACTCCATAGTCTGATCGATCTTTTCTTTTGA
AAAACTGATTAATCGGACAAAAATAAAGATAGAGTCCCATTCTACATGTCAATATCAATA
CCGGCAACAATGAAATTTAAAGTAAGAGGAAAATCCGTCGACTTTAAAAATCGTGAGGGT
TCAAG
>CH05
AGTGATAA--CTTT-CAAA--TTCAGA-GAAACCCTGGAATC--AAAAATGGGCAATCCT
-GAGCCAAATCCT-GTTTTACAAGAACAAACAAGGGTTCAGAAAGCGAAAAAAAAAAA-G
GGGGATAGGTGCAGAGACTCAACGGAAGCTGTTCTAAAAAATGGGGTTGACTGCCTTTTT
TGGTAAAAAAAGGAAAAAAAATCCTTCTATCGAATATCGAAACTCCATAAAGGATGAAGG
ATAAGCGTATATACACTATGTATACACAATGAAAAACTATCTCAAAAATGACAACCGAAT
CCGTATTTTTTTTTATGAAAAAAAAAAAAATTGTTATGAATCAATTCCAAGTTGAAAAAA
GAATCGAATATTCATTGATCAAATCATTCACTCCATAGTCTGATCGATCTTTTCTTTTGA
AAAACTGATTAATCGGACAAAAATAAAGATAGAGTCCCATTCTACATGTCAATATCAATA
CCGGCAACAATGAAATTTAAAGTAAGAGGAAAATCCGTCGACTTTAAAAATCGTGAGGGT
TCAAG
>CH06
AGTGATAA--CTTT-CAAA--TTCAGA-GAAACCCTGGAATC--AAAAATGGGCAATCCT
-GAGCCAAATCCT-GTTTTACAAGAACAAACAAGGGTTCAGAAAGCGAAAAAAAAAAA-G
GGGGATAGGTGCAGAGACTCAACGGAAGCTGTTCTAAAAAATGGGGTTGACTGCCTTTTT
TGGTAAAAAAAGGAAAAAAAATCCTTCTATCGAATATCGAAACTCCATAAAGGATGAAGG
ATAAGCGTATATACACTATGTATACACAATGAAAAACTATCTCAAAAATGACAACCGAAT
CCGTATTTTTTTTTATGAAAAAAAAAAAAATTGTTATGAATCAATTCCAAGTTGAAAAAA
GAATCGAATATTCATTGATCAAATCATTCACTCCATAGTCTGATCGATCTTTTCTTTTGA
AAAACTGATTAATCGGACAAAAATAAAGATAGAGTCCCATTCTACATGTCAATATCAATA
CCGGCAACAATGAAATTTAAAGTAAGAGGAAAATCCGTCGACTTTAAAAATCGTGAGGGT
TCAAG
>CH17
AGTGATAA--CTTT-CAAA--TTCAGA-GAAACCCTGGAATC--AAAAATGGGCAATCCT
-GAGCCAAATCCT-GTTTTACAAGAACAAACAAGGGTTCAGAAAGCGAAAAAAAAAAA-G
GGGGATAGGTGCAGAGACTCAACGGAAGCTGTTCTAAAAAATGGGGTTGACTGCCTTTTT
TGGTAAAAAAAGGAAAAAAAATCCTTCTATCGAATATCGAAACTCCATAAAGGATGAAGG
ATAAGCGTATATACACTATGTATACACAATGAAAAACTATCTCAAAAATGACAACCGAAT
CCGTATTTTTTTTTATGAAAAAAAAAAAAATTGTTATGAATCAATTCCAAGTTGAAAAAA
GAATCGAATATTCATTGATCAAATCATTCACTCCATAGTCTGATCGATCTTTTCTTTTGA
AAAACTGATTAATCGGACAAAAATAAAGATAGAGTCCCATTCTACATGTCAATATCAATA
CCGGCAACAATGAAATTTAAAGTAAGAGGAAAATCCGTCGACTTTAAAAATCGTGAGGGT
TCAAG


H41
>HD10
AGTGATAA--CTTT-CAAA--TTCAGA-GAAACCCTGGAATC--AAAAATGGGCAATCCT
-GAGCCAAATCCT-GTTTTACAAGAACAAACAAGGGTTCAGAAAGCGAAAAAAAAAAAAG
GGGGATAGGGGCAAAAACTCAACGGAAGCTGTTCTAAAAAATGGGGTTGACTGCCTTTTT
TGGTAAAAAAAGGAAAAAAAATCCTTCTATCGAATATCGAAACTCCATAAAGGATGAAGG
ATAAGCGTATATACCCTATGTATACACAATGAAAAACTATCTCAAAAATGACAACCGAAT
CCGTATTTTTTTTTATGAAAAAAAAAAAAATTGTTATGAATCAATTCCAAGTTGAAAAAA
AAATCAAATATTCTTTGATCAAATCATTCCCTCCATAGTCTGATCGATCTTTTCTTTTGA
AAAACTGATTAATCGGACAAAAATAAAAATAGAGTCCCATTCTACATGTCAATATCAATA
CCGGCAACAATGAAATTTAAAGTAAAAGGAAAATCCGTCAACTTTAAAAATCGGGAGGGT
TCAAG
>HD20
AGTGATAA--CTTT-CAAA--TTCAGA-GAAACCCTGGAATC--AAAAATGGGCAATCCT
-GAGCCAAATCCT-GTTTTACAAGAACAAACAAGGGTTCAGAAAGCGAAAAAAAAAAAAG
GGGGATAGGGGCAAAAACTCAACGGAAGCTGTTCTAAAAAATGGGGTTGACTGCCTTTTT
TGGTAAAAAAAGGAAAAAAAATCCTTCTATCGAATATCGAAACTCCATAAAGGATGAAGG
ATAAGCGTATATACCCTATGTATACACAATGAAAAACTATCTCAAAAATGACAACCGAAT
CCGTATTTTTTTTTATGAAAAAAAAAAAAATTGTTATGAATCAATTCCAAGTTGAAAAAA
AAATCAAATATTCTTTGATCAAATCATTCCCTCCATAGTCTGATCGATCTTTTCTTTTGA
AAAACTGATTAATCGGACAAAAATAAAAATAGAGTCCCATTCTACATGTCAATATCAATA
CCGGCAACAATGAAATTTAAAGTAAAAGGAAAATCCGTCAACTTTAAAAATCGGGAGGGT
TCAAG


H42
>HD17
AGTGATAA--CTTT-CAAA--TTCAGA-GAAACCCTGGAATC--AAAAATGGGCAATCCT
-GAGCCAAATCCT-GTTTTACAAGAACAAACAAGGGTTCAGAAAGCGAAAAAAAAAAAAG
GGGGATAGGGGCAAAAACTCAACGGAAGCTGTTCTAAAAAAGGGGGTTGACTGCCTTTTT
TGGTAAAAAAAGGAAAAAAAATCCTTCTATCGAATATCGAAACTCCATAAAGGATGAAGG
ATAAGCGTATATACACTATGTATACACAATGAAAAACTATCTCAAAAATGACAACCGAAT
CCGTATTTTTTTTTATGAAAAAAAAAAAAATTGTTATGAATCAATTCCAAGTTGAAAAAA
AAATCGAATATTCTTTGATCAAATCATTCACTCCATAGTCTGATCGATCTTTTCTTTTGA
AAAACTGATTAATCGGACAAAAATAAAGATAGAGTCCCATTCTACATGTCAATATCAATA
CCGGCAACAATGAAATTTAAAGTAAGAGGAAAATCCGTCGACTTTAAAAATCGTGAGGGT
TCAAG
>HD18
AGTGATAA--CTTT-CAAA--TTCAGA-GAAACCCTGGAATC--AAAAATGGGCAATCCT
-GAGCCAAATCCT-GTTTTACAAGAACAAACAAGGGTTCAGAAAGCGAAAAAAAAAAAAG
GGGGATAGGGGCAAAAACTCAACGGAAGCTGTTCTAAAAAAGGGGGTTGACTGCCTTTTT
TGGTAAAAAAAGGAAAAAAAATCCTTCTATCGAATATCGAAACTCCATAAAGGATGAAGG
ATAAGCGTATATACACTATGTATACACAATGAAAAACTATCTCAAAAATGACAACCGAAT
CCGTATTTTTTTTTATGAAAAAAAAAAAAATTGTTATGAATCAATTCCAAGTTGAAAAAA
AAATCGAATATTCTTTGATCAAATCATTCACTCCATAGTCTGATCGATCTTTTCTTTTGA
AAAACTGATTAATCGGACAAAAATAAAGATAGAGTCCCATTCTACATGTCAATATCAATA
CCGGCAACAATGAAATTTAAAGTAAGAGGAAAATCCGTCGACTTTAAAAATCGTGAGGGT
TCAAG


H43
>JG04
AGTGATAA--CTTT-CAAA--TTCAGA-GAAACCCTGGAATC--AAAAATGGGCAATCCT-GAGCCAAATCCT-GTTTTACAAGAACAAACAAGGGTTCAGAAAGCGAAAAAAAAA-GAAGGGGATAGGTGCAGAGACTCAACGGAAGCTGTTCTAAGAAATGGGGTTGACTGCCTTTTTTGGTAAAGAAAGGAAAAGAAATCCTTCTATCGAATATCGAAACTCCATAAAGGATGAAGGATAAGCGTATATACACTATGTATACACAATGAAAAACTATCTCAAAAATGACAACCGAATCCGTATTTTTTTT-ATGAAAAAGAAAAGAATTGTTATGAAGCAATTCCAAGTTGAAGAAAGAATCGAATATTCATTGATCAAATCATTCACTCCATAGTCTGATCGATCTTTTCTTTTGAAGAACTGATTAATCGGACAAGAATAAAGATAGAGTCCCATTCTACATGTCAATATCAATACCGGCAACAATGAAATTTAGAGTAAGAGGAAAATCCGTCGACTTTAGAAATCGTGAGGGTTCAAG
>JG05
AGTGATAA--CTTT-CAAA--TTCAGA-GAAACCCTGGAATC--AAAAATGGGCAATCCT-GAGCCAAATCCT-GTTTTACAAGAACAAACAAGGGTTCAGAAAGCGAAAAAAAAA-GAAGGGGATAGGTGCAGAGACTCAACGGAAGCTGTTCTAAGAAATGGGGTTGACTGCCTTTTTTGGTAAAGAAAGGAAAAGAAATCCTTCTATCGAATATCGAAACTCCATAAAGGATGAAGGATAAGCGTATATACACTATGTATACACAATGAAAAACTATCTCAAAAATGACAACCGAATCCGTATTTTTTTT-ATGAAAAAGAAAAGAATTGTTATGAAGCAATTCCAAGTTGAAGAAAGAATCGAATATTCATTGATCAAATCATTCACTCCATAGTCTGATCGATCTTTTCTTTTGAAGAACTGATTAATCGGACAAGAATAAAGATAGAGTCCCATTCTACATGTCAATATCAATACCGGCAACAATGAAATTTAGAGTAAGAGGAAAATCCGTCGACTTTAGAAATCGTGAGGGTTCAAG
>GS01
AGTGATAA--CTTT-CAAA--TTCAGA-GAAACCCTGGAATC--AAAAATGGGCAATCCT-GAGCCAAATCCT-GTTTTACAAGAACAAACAAGGGTTCAGAAAGCGAAAAAAAAA-GAAGGGGATAGGTGCAGAGACTCAACGGAAGCTGTTCTAAGAAATGGGGTTGACTGCCTTTTTTGGTAAAGAAAGGAAAAGAAATCCTTCTATCGAATATCGAAACTCCATAAAGGATGAAGGATAAGCGTATATACACTATGTATACACAATGAAAAACTATCTCAAAAATGACAACCGAATCCGTATTTTTTTT-ATGAAAAAGAAAAGAATTGTTATGAAGCAATTCCAAGTTGAAGAAAGAATCGAATATTCATTGATCAAATCATTCACTCCATAGTCTGATCGATCTTTTCTTTTGAAGAACTGATTAATCGGACAAGAATAAAGATAGAGTCCCATTCTACATGTCAATATCAATACCGGCAACAATGAAATTTAGAGTAAGAGGAAAATCCGTCGACTTTAGAAATCGTGAGGGTTCAAG
>GS02
AGTGATAA--CTTT-CAAA--TTCAGA-GAAACCCTGGAATC--AAAAATGGGCAATCCT-GAGCCAAATCCT-GTTTTACAAGAACAAACAAGGGTTCAGAAAGCGAAAAAAAAA-GAAGGGGATAGGTGCAGAGACTCAACGGAAGCTGTTCTAAGAAATGGGGTTGACTGCCTTTTTTGGTAAAGAAAGGAAAAGAAATCCTTCTATCGAATATCGAAACTCCATAAAGGATGAAGGATAAGCGTATATACACTATGTATACACAATGAAAAACTATCTCAAAAATGACAACCGAATCCGTATTTTTTTT-ATGAAAAAGAAAAGAATTGTTATGAAGCAATTCCAAGTTGAAGAAAGAATCGAATATTCATTGATCAAATCATTCACTCCATAGTCTGATCGATCTTTTCTTTTGAAGAACTGATTAATCGGACAAGAATAAAGATAGAGTCCCATTCTACATGTCAATATCAATACCGGCAACAATGAAATTTAGAGTAAGAGGAAAATCCGTCGACTTTAGAAATCGTGAGGGTTCAAG
>GS03
AGTGATAA--CTTT-CAAA--TTCAGA-GAAACCCTGGAATC--AAAAATGGGCAATCCT-GAGCCAAATCCT-GTTTTACAAGAACAAACAAGGGTTCAGAAAGCGAAAAAAAAA-GAAGGGGATAGGTGCAGAGACTCAACGGAAGCTGTTCTAAGAAATGGGGTTGACTGCCTTTTTTGGTAAAGAAAGGAAAAGAAATCCTTCTATCGAATATCGAAACTCCATAAAGGATGAAGGATAAGCGTATATACACTATGTATACACAATGAAAAACTATCTCAAAAATGACAACCGAATCCGTATTTTTTTT-ATGAAAAAGAAAAGAATTGTTATGAAGCAATTCCAAGTTGAAGAAAGAATCGAATATTCATTGATCAAATCATTCACTCCATAGTCTGATCGATCTTTTCTTTTGAAGAACTGATTAATCGGACAAGAATAAAGATAGAGTCCCATTCTACATGTCAATATCAATACCGGCAACAATGAAATTTAGAGTAAGAGGAAAATCCGTCGACTTTAGAAATCGTGAGGGTTCAAG
>GS04
AGTGATAA--CTTT-CAAA--TTCAGA-GAAACCCTGGAATC--AAAAATGGGCAATCCT-GAGCCAAATCCT-GTTTTACAAGAACAAACAAGGGTTCAGAAAGCGAAAAAAAAA-GAAGGGGATAGGTGCAGAGACTCAACGGAAGCTGTTCTAAGAAATGGGGTTGACTGCCTTTTTTGGTAAAGAAAGGAAAAGAAATCCTTCTATCGAATATCGAAACTCCATAAAGGATGAAGGATAAGCGTATATACACTATGTATACACAATGAAAAACTATCTCAAAAATGACAACCGAATCCGTATTTTTTTT-ATGAAAAAGAAAAGAATTGTTATGAAGCAATTCCAAGTTGAAGAAAGAATCGAATATTCATTGATCAAATCATTCACTCCATAGTCTGATCGATCTTTTCTTTTGAAGAACTGATTAATCGGACAAGAATAAAGATAGAGTCCCATTCTACATGTCAATATCAATACCGGCAACAATGAAATTTAGAGTAAGAGGAAAATCCGTCGACTTTAGAAATCGTGAGGGTTCAAG
>GS05
AGTGATAA--CTTT-CAAA--TTCAGA-GAAACCCTGGAATC--AAAAATGGGCAATCCT-GAGCCAAATCCT-GTTTTACAAGAACAAACAAGGGTTCAGAAAGCGAAAAAAAAA-GAAGGGGATAGGTGCAGAGACTCAACGGAAGCTGTTCTAAGAAATGGGGTTGACTGCCTTTTTTGGTAAAGAAAGGAAAAGAAATCCTTCTATCGAATATCGAAACTCCATAAAGGATGAAGGATAAGCGTATATACACTATGTATACACAATGAAAAACTATCTCAAAAATGACAACCGAATCCGTATTTTTTTT-ATGAAAAAGAAAAGAATTGTTATGAAGCAATTCCAAGTTGAAGAAAGAATCGAATATTCATTGATCAAATCATTCACTCCATAGTCTGATCGATCTTTTCTTTTGAAGAACTGATTAATCGGACAAGAATAAAGATAGAGTCCCATTCTACATGTCAATATCAATACCGGCAACAATGAAATTTAGAGTAAGAGGAAAATCCGTCGACTTTAGAAATCGTGAGGGTTCAAG
>GS06
AGTGATAA--CTTT-CAAA--TTCAGA-GAAACCCTGGAATC--AAAAATGGGCAATCCT-GAGCCAAATCCT-GTTTTACAAGAACAAACAAGGGTTCAGAAAGCGAAAAAAAAA-GAAGGGGATAGGTGCAGAGACTCAACGGAAGCTGTTCTAAGAAATGGGGTTGACTGCCTTTTTTGGTAAAGAAAGGAAAAGAAATCCTTCTATCGAATATCGAAACTCCATAAAGGATGAAGGATAAGCGTATATACACTATGTATACACAATGAAAAACTATCTCAAAAATGACAACCGAATCCGTATTTTTTTT-ATGAAAAAGAAAAGAATTGTTATGAAGCAATTCCAAGTTGAAGAAAGAATCGAATATTCATTGATCAAATCATTCACTCCATAGTCTGATCGATCTTTTCTTTTGAAGAACTGATTAATCGGACAAGAATAAAGATAGAGTCCCATTCTACATGTCAATATCAATACCGGCAACAATGAAATTTAGAGTAAGAGGAAAATCCGTCGACTTTAGAAATCGTGAGGGTTCAAG
>GS07
AGTGATAA--CTTT-CAAA--TTCAGA-GAAACCCTGGAATC--AAAAATGGGCAATCCT-GAGCCAAATCCT-GTTTTACAAGAACAAACAAGGGTTCAGAAAGCGAAAAAAAAA-GAAGGGGATAGGTGCAGAGACTCAACGGAAGCTGTTCTAAGAAATGGGGTTGACTGCCTTTTTTGGTAAAGAAAGGAAAAGAAATCCTTCTATCGAATATCGAAACTCCATAAAGGATGAAGGATAAGCGTATATACACTATGTATACACAATGAAAAACTATCTCAAAAATGACAACCGAATCCGTATTTTTTTT-ATGAAAAAGAAAAGAATTGTTATGAAGCAATTCCAAGTTGAAGAAAGAATCGAATATTCATTGATCAAATCATTCACTCCATAGTCTGATCGATCTTTTCTTTTGAAGAACTGATTAATCGGACAAGAATAAAGATAGAGTCCCATTCTACATGTCAATATCAATACCGGCAACAATGAAATTTAGAGTAAGAGGAAAATCCGTCGACTTTAGAAATCGTGAGGGTTCAAG
>GS08
AGTGATAA--CTTT-CAAA--TTCAGA-GAAACCCTGGAATC--AAAAATGGGCAATCCT-GAGCCAAATCCT-GTTTTACAAGAACAAACAAGGGTTCAGAAAGCGAAAAAAAAA-GAAGGGGATAGGTGCAGAGACTCAACGGAAGCTGTTCTAAGAAATGGGGTTGACTGCCTTTTTTGGTAAAGAAAGGAAAAGAAATCCTTCTATCGAATATCGAAACTCCATAAAGGATGAAGGATAAGCGTATATACACTATGTATACACAATGAAAAACTATCTCAAAAATGACAACCGAATCCGTATTTTTTTT-ATGAAAAAGAAAAGAATTGTTATGAAGCAATTCCAAGTTGAAGAAAGAATCGAATATTCATTGATCAAATCATTCACTCCATAGTCTGATCGATCTTTTCTTTTGAAGAACTGATTAATCGGACAAGAATAAAGATAGAGTCCCATTCTACATGTCAATATCAATACCGGCAACAATGAAATTTAGAGTAAGAGGAAAATCCGTCGACTTTAGAAATCGTGAGGGTTCAAG
>GS11
AGTGATAA--CTTT-CAAA--TTCAGA-GAAACCCTGGAATC--AAAAATGGGCAATCCT-GAGCCAAATCCT-GTTTTACAAGAACAAACAAGGGTTCAGAAAGCGAAAAAAAAA-GAAGGGGATAGGTGCAGAGACTCAACGGAAGCTGTTCTAAGAAATGGGGTTGACTGCCTTTTTTGGTAAAGAAAGGAAAAGAAATCCTTCTATCGAATATCGAAACTCCATAAAGGATGAAGGATAAGCGTATATACACTATGTATACACAATGAAAAACTATCTCAAAAATGACAACCGAATCCGTATTTTTTTT-ATGAAAAAGAAAAGAATTGTTATGAAGCAATTCCAAGTTGAAGAAAGAATCGAATATTCATTGATCAAATCATTCACTCCATAGTCTGATCGATCTTTTCTTTTGAAGAACTGATTAATCGGACAAGAATAAAGATAGAGTCCCATTCTACATGTCAATATCAATACCGGCAACAATGAAATTTAGAGTAAGAGGAAAATCCGTCGACTTTAGAAATCGTGAGGGTTCAAG


H44
>XE05
AGTGATAA--CTTT-CAAA--TTCAGA-GAAACCCTGGAATC--AAAAATGGGCAATCCT
-GAGCCAAATCCT-GTTTTACAAGAACAAACAAGGGTTCAGAAAGCGAAAAAAAAA-GAA
GGGGATAGGTGCAGAGACTCAACGGAAGCTGTTCTAAGAAATGGGGTTGACTGCCTTTTT
TGGTAAAGAAAGGAAAAGAAATCCTTCTATCGAATATCGAAACTCCATAAAGGATGAAGG
ATAAGCGTATATACACTATGTATACACAATGAAAAACTATCTCAAAAATGACAACCGAAT
CCGTATTTTTTTT-ATGAAAAAGAAAAGAATTGTTATGAATCAATTCCAAGTTGAAGAAA
GAATCGAATATTCATTGATCAAATCATTCACTCCATAGTCTGATCGATCTTTTCTTTTGA
AGAACTGATTAATCGGATAAGAATAAAGATAGAGTCCCATTCTACATGTCAATATCAATA
CCGGCAACAATGAAATTTAGAGTAAGAGGAAAATCCGTCGACTTTAGAAATCGTGAGGGT
TCAAG
>XE06
AGTGATAA--CTTT-CAAA--TTCAGA-GAAACCCTGGAATC--AAAAATGGGCAATCCT
-GAGCCAAATCCT-GTTTTACAAGAACAAACAAGGGTTCAGAAAGCGAAAAAAAAA-GAA
GGGGATAGGTGCAGAGACTCAACGGAAGCTGTTCTAAGAAATGGGGTTGACTGCCTTTTT
TGGTAAAGAAAGGAAAAGAAATCCTTCTATCGAATATCGAAACTCCATAAAGGATGAAGG
ATAAGCGTATATACACTATGTATACACAATGAAAAACTATCTCAAAAATGACAACCGAAT
CCGTATTTTTTTT-ATGAAAAAGAAAAGAATTGTTATGAATCAATTCCAAGTTGAAGAAA
GAATCGAATATTCATTGATCAAATCATTCACTCCATAGTCTGATCGATCTTTTCTTTTGA
AGAACTGATTAATCGGATAAGAATAAAGATAGAGTCCCATTCTACATGTCAATATCAATA
CCGGCAACAATGAAATTTAGAGTAAGAGGAAAATCCGTCGACTTTAGAAATCGTGAGGGT
TCAAG
>HP03
AGTGATAA--CTTT-CAAA--TTCAGA-GAAACCCTGGAATC--AAAAATGGGCAATCCT
-GAGCCAAATCCT-GTTTTACAAGAACAAACAAGGGTTCAGAAAGCGAAAAAAAAA-GAA
GGGGATAGGTGCAGAGACTCAACGGAAGCTGTTCTAAGAAATGGGGTTGACTGCCTTTTT
TGGTAAAGAAAGGAAAAGAAATCCTTCTATCGAATATCGAAACTCCATAAAGGATGAAGG
ATAAGCGTATATACACTATGTATACACAATGAAAAACTATCTCAAAAATGACAACCGAAT
CCGTATTTTTTTT-ATGAAAAAGAAAAGAATTGTTATGAATCAATTCCAAGTTGAAGAAA
GAATCGAATATTCATTGATCAAATCATTCACTCCATAGTCTGATCGATCTTTTCTTTTGA
AGAACTGATTAATCGGATAAGAATAAAGATAGAGTCCCATTCTACATGTCAATATCAATA
CCGGCAACAATGAAATTTAGAGTAAGAGGAAAATCCGTCGACTTTAGAAATCGTGAGGGT
TCAAG


H45
>PW04
AGTGATAA--CTTT-CAAA--TTCAGA-GAAACCCTGGAATC--AAAAATGGGCAATCCT
-GAGCCAAATCCT-GTTTTACAAGAACAAACAAGGGTTCAGAAAGCGAAAAAAAAA-AAG
GGGGATAGGTGCAAAGACTCAACGGAAGCTGTTCTAAAAAATGGGGTTGACTGCCTTTTT
TGGTAAAGAAAGGAAAAGAAATCCTTCTATCGAATATCGAAACTCCATAAAGGATGAAGG
ATAAGCGTATATACACTATGTATACACAATGAAAAACTATCTCAAAAATGACAACCGAAT
CCGTATTTTTTTTTATGAAAAAAAAAAAAATTGTTATGAATCAATTCCAAGTTGAAAAAA
GAATCGAATATTCATTGATCAAATCATTCACTCCATAGTCTGATCGATCTTTTCTTTTGA
AAAACTGATTAATCGGACAAAAATAAAGATAGAGTCCCATTCTACATGTCAATATCAATA
CCGGCAACAATGAAATTTAAAGTAAAAGGAAAATCCGTCGACTTTAAAAATCGTGAGGGT
TCAAG
>PW05
AGTGATAA--CTTT-CAAA--TTCAGA-GAAACCCTGGAATC--AAAAATGGGCAATCCT
-GAGCCAAATCCT-GTTTTACAAGAACAAACAAGGGTTCAGAAAGCGAAAAAAAAA-AAG
GGGGATAGGTGCAAAGACTCAACGGAAGCTGTTCTAAAAAATGGGGTTGACTGCCTTTTT
TGGTAAAGAAAGGAAAAGAAATCCTTCTATCGAATATCGAAACTCCATAAAGGATGAAGG
ATAAGCGTATATACACTATGTATACACAATGAAAAACTATCTCAAAAATGACAACCGAAT
CCGTATTTTTTTTTATGAAAAAAAAAAAAATTGTTATGAATCAATTCCAAGTTGAAAAAA
GAATCGAATATTCATTGATCAAATCATTCACTCCATAGTCTGATCGATCTTTTCTTTTGA
AAAACTGATTAATCGGACAAAAATAAAGATAGAGTCCCATTCTACATGTCAATATCAATA
CCGGCAACAATGAAATTTAAAGTAAAAGGAAAATCCGTCGACTTTAAAAATCGTGAGGGT
TCAAG
>PW06
AGTGATAA--CTTT-CAAA--TTCAGA-GAAACCCTGGAATC--AAAAATGGGCAATCCT
-GAGCCAAATCCT-GTTTTACAAGAACAAACAAGGGTTCAGAAAGCGAAAAAAAAA-AAG
GGGGATAGGTGCAAAGACTCAACGGAAGCTGTTCTAAAAAATGGGGTTGACTGCCTTTTT
TGGTAAAGAAAGGAAAAGAAATCCTTCTATCGAATATCGAAACTCCATAAAGGATGAAGG
ATAAGCGTATATACACTATGTATACACAATGAAAAACTATCTCAAAAATGACAACCGAAT
CCGTATTTTTTTTTATGAAAAAAAAAAAAATTGTTATGAATCAATTCCAAGTTGAAAAAA
GAATCGAATATTCATTGATCAAATCATTCACTCCATAGTCTGATCGATCTTTTCTTTTGA
AAAACTGATTAATCGGACAAAAATAAAGATAGAGTCCCATTCTACATGTCAATATCAATA
CCGGCAACAATGAAATTTAAAGTAAAAGGAAAATCCGTCGACTTTAAAAATCGTGAGGGT
TCAAG
>PW17
AGTGATAA--CTTT-CAAA--TTCAGA-GAAACCCTGGAATC--AAAAATGGGCAATCCT
-GAGCCAAATCCT-GTTTTACAAGAACAAACAAGGGTTCAGAAAGCGAAAAAAAAA-AAG
GGGGATAGGTGCAAAGACTCAACGGAAGCTGTTCTAAAAAATGGGGTTGACTGCCTTTTT
TGGTAAAGAAAGGAAAAGAAATCCTTCTATCGAATATCGAAACTCCATAAAGGATGAAGG
ATAAGCGTATATACACTATGTATACACAATGAAAAACTATCTCAAAAATGACAACCGAAT
CCGTATTTTTTTTTATGAAAAAAAAAAAAATTGTTATGAATCAATTCCAAGTTGAAAAAA
GAATCGAATATTCATTGATCAAATCATTCACTCCATAGTCTGATCGATCTTTTCTTTTGA
AAAACTGATTAATCGGACAAAAATAAAGATAGAGTCCCATTCTACATGTCAATATCAATA
CCGGCAACAATGAAATTTAAAGTAAAAGGAAAATCCGTCGACTTTAAAAATCGTGAGGGT
TCAAG
>PW20
AGTGATAA--CTTT-CAAA--TTCAGA-GAAACCCTGGAATC--AAAAATGGGCAATCCT
-GAGCCAAATCCT-GTTTTACAAGAACAAACAAGGGTTCAGAAAGCGAAAAAAAAA-AAG
GGGGATAGGTGCAAAGACTCAACGGAAGCTGTTCTAAAAAATGGGGTTGACTGCCTTTTT
TGGTAAAGAAAGGAAAAGAAATCCTTCTATCGAATATCGAAACTCCATAAAGGATGAAGG
ATAAGCGTATATACACTATGTATACACAATGAAAAACTATCTCAAAAATGACAACCGAAT
CCGTATTTTTTTTTATGAAAAAAAAAAAAATTGTTATGAATCAATTCCAAGTTGAAAAAA
GAATCGAATATTCATTGATCAAATCATTCACTCCATAGTCTGATCGATCTTTTCTTTTGA
AAAACTGATTAATCGGACAAAAATAAAGATAGAGTCCCATTCTACATGTCAATATCAATA
CCGGCAACAATGAAATTTAAAGTAAAAGGAAAATCCGTCGACTTTAAAAATCGTGAGGGT
TCAAG


H46
>PW11
AGTGATAA--CTTT-CAAA--TTCAGA-GAAACCCTGGAATC--AAAAATGGGCAATCCT
-GAGCCAAATCCT-GTTTTACAAGAACAAACAAGGGTTCAGAAAGCGAAAAAAAAAAA-G
GGGGATAGGTGCAAAGACTCAACGGAAGCTGTTCTAAAAAATGGGGTTGACTGCCTTTTT
TGGTAAAGAAAGGAAAAAAAATCCTTCTATCGAATATCGAAACTCCATAAAGGATGAAGG
ATAAGCGTATATACACTATGTATACACAATGAAAAACTATCTCAAAAATGACAACCGAAT
CCGTATTTTTTTTTATGAAAAAAAAAAAAATTGTTATGAATCAATTCCAAGTTGAAAAAA
GAATCGAATATTCATTGATCAAATCATTCACTCCATAGTCTGATCGATCTTTTCTTTTGA
AAAACTGATTAATCGGACAAAAATAAAGATAGAGTCCCATTCTACATGTCAATATCAATA
CCGGCAACAATGAAATTTAAAGTAAGAGGAAAATCCGTCGACTTTAAAAATCGTGAGGGT
TCAAG
>YF15
AGTGATAA--CTTT-CAAA--TTCAGA-GAAACCCTGGAATC--AAAAATGGGCAATCCT
-GAGCCAAATCCT-GTTTTACAAGAACAAACAAGGGTTCAGAAAGCGAAAAAAAAAAA-G
GGGGATAGGTGCAAAGACTCAACGGAAGCTGTTCTAAAAAATGGGGTTGACTGCCTTTTT
TGGTAAAGAAAGGAAAAAAAATCCTTCTATCGAATATCGAAACTCCATAAAGGATGAAGG
ATAAGCGTATATACACTATGTATACACAATGAAAAACTATCTCAAAAATGACAACCGAAT
CCGTATTTTTTTTTATGAAAAAAAAAAAAATTGTTATGAATCAATTCCAAGTTGAAAAAA
GAATCGAATATTCATTGATCAAATCATTCACTCCATAGTCTGATCGATCTTTTCTTTTGA
AAAACTGATTAATCGGACAAAAATAAAGATAGAGTCCCATTCTACATGTCAATATCAATA
CCGGCAACAATGAAATTTAAAGTAAGAGGAAAATCCGTCGACTTTAAAAATCGTGAGGGT
TCAAG
