# Supplementary material for: Population Structure and Genetic Diversity of the Toona ciliata (Meliaceae) Complex Assayed with Chloroplast DNA Markers
Source: Genes (Basel). 2024 Feb 28;15(3):320. doi: 10.3390/genes15030320 (PMC10970150; doi:10.3390/genes15030320)
Supplement: Supplementary file 1 [file genes-15-00320-s001.zip › genes-2866691-supplementary/Table S3.txt]

>XJ01
ATCGCTGACTAGCTGCTATTGAGCCCCATCTACAAATGGATAATTCTGTCTTAGTGGAGACGAGTTTTTGAAAATAACGGAGAAATACCGACTCTCTTGCAAGAGAGTCGGTATTTCTCAGTTATTTTTTATGTTTTTCTTTAGTAGTTTTTTATTTCTATCCTTTTTTTACGAAAAGTATTTTTATGCTTTTGCTTTGATTTTGTCTGATATTTTTGTTATGGTTATGGGCTCATATTCGTTATGTACCAGTATAATAATATTAGTTATTTGTTAATCCCACTAATAAAGTTCTAATTTTATTAATTCGATTCTAATTTTCGAATTTTTTAGTTTTTTTAATAGAAAATAAAAGAAAAGAGAAAGTTGTAATTTTATGCCTCTTAGATCTTCATTTCTATTTTAAATGGTAGAAATTGAAACCTTTTTATTAAATATTTTATTAAATAGAAATAAAAAAAATTTTAAATCGTGGAGGAAGGGGGGGCGGATGTAGCCAAGTGGATCAAGGCAGTGGATTGTGAATCCACCATGCACGAGATGATGAGCTTGGTATGGAACCTACTAAGTGATAACTTTCAAATTCAGAGAAACCCTGGAATCAAAAATGGGCAATCCTGAGCCAAATCCTGTTTTACAAGAACAAACAAGGGTTCAGAAAGCGAAAAAAAAAGAAGGGGATAGGTGCAGAGACTCAACGGAAGCTGTTCTAAGAAATGGGGTTGACTGCCTTTTTTGGTAAAGAAAGGAAAAGAAATCCTATCGAAACTCCATAAAGGATGAAGGATAAGCGTATATACACTATGTATACACAATGAAAAACTATCTCAAAAATGACAACCGAATCCGTATTTTTTTTATGAAAAAGAAAAGAATTGTTATGAATCAATTCCAAGTTGAAGAAAGAATCGAATATTCATTGATCAAATCATTCACTCCATAGTCTGATCGATCTTTTCTTTTGAAGAACTGATTAATCGGACAAGAATAAAGATAGAGTCCCATTCTACATGTCAATATCAATACCGGCAACAATGAAATTTAGAGTAAGAGGAAAATCCGTCGACTTTAGAAATCGTGAGGGTTCAAGTCCTCTCCTATTCCCCCA
>XJ02
AATTCTCTGACTAGCTGCTATTGAGCCCCATCTACAAATGGATAATTCTGTCTTAGTGGAGACGAGTTTTTGAAAATAACGGAGAAATACCGACTCTCTTGCAAGAGAGTCGGTATTTCTCAGTTATTTTTTATGTTTTTCTTTAGTAGTTTTTTATTTCTATCCTTTTTTTACGAAAAGTATTTTTATGCTTTTGCTTTGATTTTGTCTGATATTTTTGTTATGGTTATGGGCTCATATTCGTTATGTACCAGTATAATAATATTAGTTATTTGTTAATCCCACTAATAAAGTTCTAATTTTATTAATTCGATTCTAATTTTCGAATTTTTTAGTTTTTTTAATAGAAAATAAAAGAAAAGAGAAAGTTGTAATTTTATGCCTCTTAGATCTTCATTTCTATTTTAAATGGTAGAAATTGAAACCTTTTTATTAAATATTTTATTAAATAGAAATAAAAAAAATTTTAAATCGTGGAGGAAGGGGGGGCGGATGTAGCCAAGTGGATCAAGGCAGTGGATTGTGAATCCACCATGCACGAGGATTGCATGAGCTGGTATGGACTACTAAGTGATAACTTTCAAATTCAGAGAAACCCTGGAATCAAAAATGGGCAATCCTGAGCCAAATCCTGTTTTACAAGAACAAACAAGGGTTCAGAAAGCGAAAAAAAAAGAAGGGGATAGGTGCAGAGACTCAACGGAAGCTGTTCTAAGAAATGGGGTTGACTGCCTTTTTTGGTAAAGAAAGGAAAAGAAATCCTATCGAAACTCCATAAAGGATGAAGGATAAGCGTATATACACTATGTATACACAATGAAAAACTATCTCAAAAATGACAACCGAATCCGTATTTTTTTTATGAAAAAGAAAAGAATTGTTATGAATCAATTCCAAGTTGAAGAAAGAATCGAATATTCATTGATCAAATCATTCACTCCATAGTCTGATCGATCTTTTCTTTTGAAGAACTGATTAATCGGACAAGAATAAAGATAGAGTCCCATTCTACATGTCAATATCAATACCGGCAACAATGAAATTTAGAGTAAGAGGAAAATCCGTCGACTTTAGAAATCGTGAGGGTTCAAGTCCCTTCTATCCCCCATTTGCCCAAT
>XJ03
ATTCGTCTGACTAGCTGCTATTGAGCCCCATCTACAAATGGATAATTCTGTCTTAGTGGAGACGAGTTTTTGAAAATAACGGAGAAATACCGACTCTCTTGCAAGAGAGTCGGTATTTCTCCGTTATTTTTTATGTTTTTCTTTAGTAGTTTTTTATTTCTATCCTTTTTTTACGAAAAGTATTTTTATGCTTTTGCTTTGATTTTGTCTGATATTTTTGTTATGGTTATGGGCTCATATTCGTTATGTACCAGTATAATAATATTAGTTATTTGTTAATCCCACTAATAAAGTTCTAATTTTATTAATTCGATTCTAATTTTCGAATTTTTTAGTTTTTTTAATAGAAAATAAAAGAAAAGAGAAAGTTGTAATTTTATGCCTCTTAGATCTTCATTTCTATTTTAAATGGTAGAAATTGAAACCTTTTTATTAAATATTTTATTAAATAGAAATAAAAAAAATTTTAAATCGTGGAGGAAGGGGGGGCGGATGTAGCCAAGTGGATCAAGGCAGTGGATTGTGAATCCACCATGCACGAGCAATGATGAGCTTGGTATGGAACTACTAAGTGATAACTTTCAAATTCAGAGAAACCCTGGAATCAAAAATGGGCAATCCTGAGCCAAATCCTGTTTTACAAGAACAAACAAGGGTTCAGAAAGCGAAAAAAAAAGAAGGGGATAGGTGCAGAGACTCAACGGAAGCTGTTCTAAGAAATGGGGTTGACTGCCTTTTTTGGTAAAGAAAGGAAAAGAAATCCTATCGAAACTCCATAAAGGATGAAGGATAAGCGTATATACACTATGTATACACAATGAAAAACTATCTCAAAAATGACAACCGAATCCGTATTTTTTTTATGAAAAAGAAAAGAATTGTTATGAATCAATTCCAAGTTGAAGAAAGAATCGAATATTCATTGATCAAATCATTCACTCCATAGTCTGATCGATCTTTTCTTTTGAAGAACTGATTAATCGGACAAGAATAAAGATAGAGTCCCATTCTACATGTCAATATCAATACCGGCAACAATGAAATTTAGAGTAAGAGGAAAATCCGTCGACTTTAGAAATCGTGAGGGTTCAAGTCCTTCTTTCCCCCA
>XJ04
AGTCTCTGACTAGCTGCTATTGAGCCCCATCTACAAATGGATAATTCTGTCTTAGTGGAGACGAGTTTTTGAAAATAACGGAGAAATACCGACTCTCTTGCAAGAGAGTCGGTATTTCTCCGTTATTTTTTATGTTTTTCTTTAGTAGTTTTTTATTTCTATCCTTTTTTTACGAAAAGTATTTTTATGCTTTTGCTTTGATTTTGTCTGATATTTTTGTTATGGTTATGGGCTCATATTCGTTATGTACCAGTATAATAATATTAGTTATTTGTTAATCCCACTAATAAAGTTCTAATTTTATTAATTCGATTCTAATTTTCGAATTTTTTAGTTTTTTTAATAGAAAATAAAAGAAAAGAGAAAGTTGTAATTTTATGCCTCTTAGATCTTCATTTCTATTTTAAATGGTAGAAATTGAAACCTTTTTATTAAATATTTTATTAAATAGAAATAAAAAAAATTTTAAATCGTGGAGGAAGGGGGGGCGGATGTAGCCAAGTGGATCAAGGCAGTGGATTGTGAATCCACCATGAGCGAAGAGGATGGATGGCTTGGTATGGACTACTAAGTGATAACTTTCAAATTCAGAGAAACCCTGGAATCAAAAATGGGCAATCCTGAGCCAAATCCTGTTTTACAAGAACAAACAAGGGTTCAGAAAGCGAAAAAAAAAGAAGGGGATAGGTGCAGAGACTCAACGGAAGCTGTTCTAAGAAATGGGGTTGACTGCCTTTTTTGGTAAAGAAAGGAAAAGAAATCCTATCGAAACTCCATAAAGGATGAAGGATAAGCGTATATACACTATGTATACACAATGAAAAACTATCTCAAAAATGACAACCGAATCCGTATTTTTTTTATGAAAAAGAAAAGAATTGTTATGAATCAATTCCAAGTTGAAGAAAGAATCGAATATTCATTGATCAAATCATTCACTCCATAGTCTGATCGATCTTTTCTTTTGAAGAACTGATTAATCGGACAAGAATAAAGATAGAGTCCCATTCTACATGTCAATATCAATACCGGCAACAATGAAATTTAGAGTAAGAGGAAAATCCGTCGACTTTAGAAATCGTGAGGGTTCAAGTCCCTCCTATCCCCCA
>XJ05
ACTCTCTGACTAGCTGCTATTGAGCCCCATCTACAAATGGATAATTCTGTCTTAGTGGAGACGAGTTTTTGAAAATAACGGAGAAATACCGACTCTCTTGCAAGAGAGTCGGTATTTCTCCGTTATTTTTTATGTTTTTCTTTAGTAGTTTTTTATTTCTATCCTTTTTTTACGAAAAGTATTTTTATGCTTTTGCTTTGATTTTGTCTGATATTTTTGTTATGGTTATGAGCTCATATTCGTTATGTACCAGTATAATAATATTAGTTATTTGTTAATCCCACTAATAAAGTTCTAATTTTATTAATTCGATTCTAATTTTCGAATTTTTTAGTTTTTTTAATAGAAAATAAAAGAAAAGAGAAAGTTGTAATTTTATGCCTCTTAGATCTTCATTTCTATTTTAAATGGTAGAAATTGAAACCTTTTTATTAAATATTTTATTAAATAGAAATAAAAAAAATTTTAAATCGTGGAGGAAGGGGGGGCGGATGTAGCCAAGTGGATCAAGGCAGTGGATTGTGAATCCACCATGAGCGACGAGGGCATGGCATGAGCTTGGTATGGAACTACTAAGTGATAACTTTCAAATTCAGAGAAACCCTGGAATCAAAAATGGGCAATCCTGAGCCAAATCCTGTTTTACAAGAACAAACAAGGGTTCAGAAAGCGAAAAAAAAAGAAGGGGATAGGTGCAGAGACTCAACGGAAGCTGTTCTAAGAAATGGGGTTGACTGCCTTTTTTGGTAAAGAAAGGAAAAGAAATCCTATCGAAACTCCATAAAGGATGAAGGATAAGCGTATATACACTATGTATACACAATGAAAAACTATCTCAAAAATGACAACCGAATCCGTATTTTTTTTATGAAAAAGAAAAGAATTGTTATGAATCAATTCCAAGTTGAAGAAAGAATCGAATATTCATTGATCAAATCATTCACTCCATAGTCTGATCGATCTTTTCTTTTGAAGAACTGATTAATCGGACAAGAATAAAGATAGAGTCCCATTCTACATGTCAATATCAATACCGGCAACAATGAAATTTAGAGTAAGAGGAAAATCCGTCGACTTTAGAAATCGTGAGGGTTCAAGTCCCTTCTATTCCCCCAGAA
>XJ06
AATTCACTGACTAGCTGCTATTGAGCCCCATCTACAAATGGATAATTCTGTCTTAGTGGAGACGAGTTTTTGAAAATAACGGAGAAATACCGACTCTCTTGCAAGAGAGTCGGTATTTCTCCGTTATTTTTTATGTTTTTCTTTAGTAGTTTTTTATTTCTATCCTTTTTTTACGAAAAGTATTTTTATGCTTTTGCTTTGATTTTGTCTGATATTTTTGTTATGGTTATGGGCTCATATTCGTTATGTACCAGTATAATAATATTAGTTATTTGTTAATCCCACTAATAAAGTTCTAATTTTATTAATTCGATTCTAATTTTCGAATTTTTTAGTTTTTTTAATAGAAAATAAAAGAAAAGAGAAAGTTGTAATTTTATGCCTCTTAGATCTTCATTTCTATTTTAAATGGTAGAAATTGAAACCTTTTTATTAAATATTTTATTAAATAGAAATAAAAAAAATTTTAAATCGTGGAGGAAGGGGGGGCGGATGTAGCCAAGTGGATCAAGGCAGTGGATTGTGAATCCACCATGAGCGACGAGATTGGATGGGCTTGGTATGGAACTACTAAGTGATAACTTTCAAATTCAGAGAAACCCTGGAATCAAAAATGGGCAATCCTGAGCCAAATCCTGTTTTACAAGAACAAACAAGGGTTCAGAAAGCGAAAAAAAAAGAAGGGGATAGGTGCAGAGACTCAACGGAAGCTGTTCTAAGAAATGGGGTTGACTGCCTTTTTTGGTAAAGAAAGGAAAAGAAATCCTATCGAAACTCCATAAAGGATGAAGGATAAGCGTATATACACTATGTATACACAATGAAAAACTATCTCAAAAATGACAACCGAATCCGTATTTTTTTTATGAAAAAGAAAAGAATTGTTATGAATCAATTCCAAGTTGAAGAAAGAATCGAATATTCATTGATCAAATCATTCACTCCATAGTCTGATCGATCTTTTCTTTTGAAGAACTGATTAATCGGACAAGAATAAAGATAGAGTCCCATTCTACATGTCAATATCAATACCGGCAACAATGAAATTTAGAGTAAGAGGAAAATCCGTCGACTTTAGAAATCGTGAGGGTTCAAGTCCCTTCTATCCCCCAAA
>XJ07
AATTCGTCTGACTAGCTGCTATTGAGCCCCATCTACAAATGGATAATTCTGTCTTAGTGGAGACGAGTTTTTGAAAATAACGGAGAAATACCGACTCTCTTGCAAGAGAGTCGGTATTTCTCCGTTATTTTTTATGTTTTTCTTTAGTAGTTTTTTATTTCTATCCTTTTTTTACGAAAAGTATTTTTATGCTTTTGCTTTGATTTTGTCTGATATTTTTGTTATGGTTATGGGCTCATATTCGTTATGTACCAGTATAATAATATTAGTTATTTGTTAATCCCACTAATAAAGTTCTAATTTTATTAATTCGATTCTAATTTTCGAATTTTTTAGTTTTTTTAATAGAAAATAAAAGAAAAGAGAAAGTTGTAATTTTATGCCTCTTAGATCTTCATTTCTATTTTAAATGGTAGAAATTGAAACCTTTTTATTAAATATTTTATTAAATAGAAATAAAAAAAATTTTAAATCGTGGAGGAAGGGGGGGCGGATGTAGCCAAGTGGATCAAGGCAGTGGATTGTGAATCCACCATGCACGAGATGATGGCTTGGTATGGACTACTAAGTGATAACTTTCAAATTCAGAGAAACCCTGGAATCAAAAATGGGCAATCCTGAGCCAAATCCTGTTTTACAAGAACAAACAAGGGTTCAGAAAGCGAAAAAAAAAGAAGGGGATAGGTGCAGAGACTCAACGGAAGCTGTTCTAAGAAATGGGGTTGACTGCCTTTTTTGGTAAAGAAAGGAAAAGAAATCCTATCGAAACTCCATAAAGGATGAAGGATAAGCGTATATACACTATGTATACACAATGAAAAACTATCTCAAAAATGACAACCGAATCCGTATTTTTTTTATGAAAAAGAAAAGAATTGTTATGAATCAATTCCAAGTTGAAGAAAGAATCGAATATTCATTGATCAAATCATTCACTCCATAGTCTGATCGATCTTTTCTTTTGAAGAACTGATTAATCGGACAAGAATAAAGATAGAGTCCCATTCTACATGTCAATATCAATACCGGCAACAATGAAATTTAGAGTAAGAGGAAAATCCGTCGACTTTAGAAATCGTGAGGGTTCAAGTCCCTCCCTATTCCCCA
>XJ08
AATTCGTCTGACTAGCTGCTATTGAGCCCCATCTACAAATGGATAATTCTGTCTTAGTGGAGACGAGTTTTTGAAAATAACGGAGAAATACCGACTCTCTTGCAAGAGAGTCGGTATTTCTCCGTTATTTTTTATGTTTTTCTTTAGTAGTTTTTTATTTCTATCCTTTTTTTACGAAAAGTATTTTTATGCTTTTGCTTTGATTTTGTCTGATATTTTTGTTATGGTTATGGGCTCATATTCGTTATGTACCAGTATAATAATATTAGTTATTTGTTAATCCCACTAATAAAGTTCTAATTTTATTAATTCGATTCTAATTTTCGAATTTTTTAGTTTTTTTAATAGAAAATAAAAGAAAAGAGAAAGTTGTAATTTTATGCCTCTTAGATCTTCATTTCTATTTTAAATGGTAGAAATTGAAACCTTTTTATTAAATATTTTATTAAATAGAAATAAAAAAAATTTTAAATCGTGGAGGAAGGGGGGGCGGATGTAGCCAAGTGGATCAAGGCAGTGGATTGTGAATCCACCATGCACGAGGGATGCTGAGCTTGGTATGGACCTACTAAGTGATAACTTTCAAATTCAGAGAAACCCTGGAATCAAAAATGGGCAATCCTGAGCCAAATCCTGTTTTACAAGAACAAACAAGGGTTCAGAAAGCGAAAAAAAAAGAAGGGGATAGGTGCAGAGACTCAACGGAAGCTGTTCTAAGAAATGGGGTTGACTGCCTTTTTTGGTAAAGAAAGGAAAAGAAATCCTATCGAAACTCCATAAAGGATGAAGGATAAGCGTATATACACTATGTATACACAATGAAAAACTATCTCAAAAATGACAACCGAATCCGTATTTTTTTTATGAAAAAGAAAAGAATTGTTATGAATCAATTCCAAGTTGAAGAAAGAATCGAATATTCATTGATCAAATCATTCACTCCATAGTCTGATCGATCTTTTCTTTTGAAGAACTGATTAATCGGACAAGAATAAAGATAGAGTCCCATTCTACATGTCAATATCAATACCGGCAACAATGAAATTTAGAGTAAGAGGAAAATCCGTCGACTTTAGAAATCGTGAGGGTTCAAGTCCCTCCTATCCCCCAGAAGGAGA
>XJ09
ATCTCTGACTAGCTGCTATTGAGCCCCATCTACAAATGGATAATTCTGTCTTAGTGGAGACGAGTTTTTGAAAATAACGGAGAAATACCGACTCTCTTGCAAGAGAGTCGGTATTTCTCAGTTATTTTTTATGTTTTTCTTTAGTAGTTTTTTATTTCTATCCTTTTTTTACGAAAAGTATTTTTATGCTTTTGCTTTGATTTTGTCTGATATTTTTGTTATGGTTATGGGCTCATATTCGTTATGTACCAGTATAATAATATTAGTTATTTGTTAATCCCACTAATAAAGTTCTAATTTTATTAATTCGATTCTAATTTTCGAATTTTTTAGTTTTTTTAATAGAAAATAAAAGAAAAGAGAAAGTTGTAATTTTATGCCTCTTAGATCTTCATTTCTATTTTAAATGGTAGAAATTGAAACCTTTTTATTAAATATTTTATTAAATAGAAATAAAAAAAATTTTAAATCGTGGAGGAAGGGGGGGCGGATGTAGCCAAGTGGATCAAGGCAGTGGATTGTGAATCCACCATGCACGAGTGGCTGAGCTTGGTATGGAACCTACTAAGTGATAACTTTCAAATTCAGAGAAACCCTGGAATCAAAAATGGGCAATCCTGAGCCAAATCCTGTTTTACAAGAACAAACAAGGGTTCAGAAAGCGAAAAAAAAAGAAGGGGATAGGTGCAGAGACTCAACGGAAGCTGTTCTAAGAAATGGGGTTGACTGCCTTTTTTGGTAAAGAAAGGAAAAGAAATCCTATCGAAACTCCATAAAGGATGAAGGATAAGCGTATATACACTATGTATACACAATGAAAAACTATCTCAAAAATGACAACCGAATCCGTATTTTTTTTATGAAAAAGAAAAGAATTGTTATGAATCAATTCCAAGTTGAAGAAAGAATCGAATATTCATTGATCAAATCATTCACTCCATAGTCTGATCGATCTTTTCTTTTGAAGAACTGATTAATCGGACAAGAATAAAGATAGAGTCCCATTCTACATGTCAATATCAATACCGGCAACAATGAAATTTAGAGTAAGAGGAAAATCCGTCGACTTTAGAAATCGTGAGGGTTCAAGTCCTTCCTATTCCCCAA
>LL01
AATCTTGACTAGCTGCTATTGAGCCCCATCTACAAATGGATAATTCTGTCTTAGTGGAGACGAGTTTTTGAAAATAACGGAGAAATACCGACTCTCTTGCAGAGAGTCGGTATTTCTCAGTTATTTTTTATGTTTTTCTTTAGTAGTTTTTTATTTCTATCTTTTTTTTACGAAAAGTATTTTTATGCTTTTGCTTTGATTTTGTCTGATATTTTTGTTATGGTTATGGGCTCATATTCGTTATGTACCAGTATAATAATATTAGTTATTTGTTAATCCCACTAATAAAGTTCTAATTTTATTAATTCGATTCTAATTTTCGAATTTTTTAGTTTTTTTAATATAAAATAAAAGAAAAGAGAAAGTTGTAATTTTATGCCTCTTAGATCTTCATTTCTATTTTAATCATTTCTATTTTAAATGGTAGAAATTGAAACCTTTTTATTAAATATTTTATTAAATAGAAATAAAAAAATTTTTAAATCGTGGAGGAAGGGGGGGCGGATGTAGCCAAGTGGATCAAGGCAGTGGATTGTGAATCCACCATGCGCGACGAGATGGATGGCTTGGTATGGAACCTACTAAGTGATAACTTTCAAATTCAGAGAAACCCTGGAATCAAAAATGGGCAATCCTGAGCCAAATCCTGTTTTACAAGAACAAACAAGGGTTCAGAAAGCGAAAAAAAAAAAGGGGGATAGGTGCAGAGACTCAACGGAAGCTGTTCTAAGAAATGGGGTTGACTGCCTTTTTTGGTAAAGAAAGGAAAAGAAATCCTTCTATCGAATATCGAAACTCCATAAAGGATGAAGGATAAGCGTATATACACTATGTATACACAATGAAAAACTATCTCAAAAATGACAACCGAATCCGTATTTTTTTTTATGAAAAAAAAAAAAATTGTTATGAATCAATTCCAAGTTGAAAAAAGAATCGAATATTCATTGATCAAATCATTCACTCCATAGTCTGATCGATCTTTTCTTTTGAAAAACTGATTAATCGGACAAGAATAAAGATAGAGTCCCATTCTACATGTCAATATCAATACCGGCAACAATGAAATTTAGAGTAAGAGGAAAATCCGTCGACTTTAGAAATCGTGAGGGTTCAAGTCCCTCTTTCCCAAA
>LL02
ACTCTCTGACTAGCTGCTATTGAGCCCCATCTACAAATGGATAATTCTGTCTTAGTGGAGACGAGTTTTTGAAAATAACGGAGAAATACCGACTCTCTTGCAAGAGAGTCGGTATTTTTCCGTTATTTTTTATGTTTTTCTTTAGTAGTTTTTTATTTCTATCTTTTTTTTACGAAAAGTATTTTTATGCTTTTGCTTTGATTTTGTCTGATATTTTTGTTATGGTTATGGGCTCATATTCGTTATGTACCAGTATAATAATATTAGTTATTTGTTAATCCCACTAATAAAGTTCTAATTTTATTAATTCGATTCTAATTTTCGAATTTTTTAGTTTTTTTAATATAAAATAAAAGAAAAGAGAAAGTTGTAATTTTATGCCTCTTAGATCTTCATTTCTATTTTAATCATTTCTATTTTAAATGGTAGAAATTGAAACCTTTTTATTAAAAATTTTATTAACCAGAAATAAAAAAAATTTTAAATCGTGGAGGAAGGGGGGGCGGATGTAGTCAAGTGGAAAATTGTAGGGCATTGTGTGTCCACCCTACGCGAGCGAGTTCGGATGGATGAGCTTGGTATGGAACCTACTAAGTGATAACTTTCAAATTCAGAGAAACCCTGGAATCAAAAATGGGCAATCCTGAGCCAAATCCTGTTTTACAAGAACAAACAAGGGTTCAGAAAGCGAAAAAAAAAAAGGGGGATAGGTGCAGAGACTCAACGGAAGCTGTTCTAAGAAATGGGGTTGACTGCCTTTTTTGGTAAAGAAAGGAAAAGAAATCCTTCTATCGAATATCGAAACTCCATAAAGGATGAAGGATAAGCGTATATACACTATGTATACACAATGAAAAACTATCTCAAAAATGACAACCGAATCCGTATTTTTTTTTATGAAAAAAAAAAAAATTGTTATGAATCAATTCCAAGTTGAAAAAAGAATCGAATATTCATTGATCAAATCATTCACTCCATAGTCTGATCGATCTTTTCTTTTGAAAAACTGATTAATCGGACAAAAATAAAGATAGAGTCCCATTCTACATGTCAATATCAATACCGGCAACAATGAAATTTAGAGTAAGAGGAAAATCCGTCGACTTTAGAAATCGTGAGGGTTCAAGTCCCTCCTTTCCCAAA
>LL03
ATTCTCTGACTAGCTGCTATTGAGCCCCATCTACAAATGGATAATTCTGTCTTAGTGGAGACGAGTTTTTGAAAATAACGGAGAAATACCGACTCTCTTGCAAGAGAGTCGGTATTTCTCCGTTATTTTTTATGTTTTTCTTTAGTAGTTTTTTATTTCTATCTTTTTTTTACGAAAAGTATTTTTATGCTTTTGCTTTGATTTTGTCTGATATTTTTGTTATGGTTATGGGCTCATATTCGTTATGTACCAGTATAATAATATTAGTTATTTGTTAATCCCACTAATAAAGTTCTAATTTTATTAATTCGATTCTAATTTTCGAATTTTTTAGTTTTTTTAATATAAAATAAAAGAAAAGAGAAAGTTGTAATTTTATGCCTCTTAGATCTTCATTTCTATTTTAATCATTTCTATTTTAAATGGTAGAAATTGAAACCTTTTTATTAAATATTTTATTAAATAGAAATAAAAAAATTTTTAAATCGTGGAGGAAGGGGGGGCGGATGTAGCCAAGTGGATCAAGGCAGTGGATTGTGAATCCACCATGAAGCGAGGGGCATGAGCTTGGTATGGAACCTACTAAGTGATAACTTTCAAATTCAGAGAAACCCTGGAATCAAAAATGGGCAATCCTGAGCCAAATCCTGTTTTACAAGAACAAACAAGGGTTCAGAAAGCGAAAAAAAAAAAGGGGGATAGGTGCAGAGACTCAACGGAAGCTGTTCTAAGAAATGGGGTTGACTGCCTTTTTTGGTAAAGAAAGGAAAAGAAATCCTTCTATCGAATATCGAAACTCCATAAAGGATGAAGGATAAGCGTATATACACTATGTATACACAATGAAAAACTATCTCAAAAATGACAACCGAATCCGTATTTTTTTTTATGAAAAAAAAAAAAATTGTTATGAATCAATTCCAAGTTGAAAAAAGAATCGAATATTCATTGATCAAATCATTCACTCCATAGTCTGATCGATCTTTTCTTTTGAAAAACTGATTAATCGGACAAAAATAAAGATAGAGTCCCATTCTACATGTCAATATCAATACCGGCAACAATGAAATTTAGAGTAAGAGGAAAATCCGTCAACTTTAGAAATCGTGAGGGTTCAAGTCCCTCCTTTCCCA
>LL04
ATTCTCTGACTAGCTGCTATTGAGCCCCATCTACAAATGGATAATTCTGTCTTAGTGGAGACGAGTTTTTGAAAATAACGGAGAAATACCGACTCTCTTGCAAGAGAGTCGGTATTTCTCCGTTATTTTTTATGTTTTTCTTTAGTAGTTTTTTATTTCTATCTTTTTTTTACGAAAAGTATTTTTATGCTTTTGCTTTGATTTTGTCTGATATTTTTGTTATGGTTATGGGCTCATATTCGTTATGTACCAGTATAATAATATTAGTTATTTGTTAATCCCACTAATAAAGTTCTAATTTTATTAATTCGATTCTAATTTTCGAATTTTTTAGTTTTTTTAATATAAAATAAAAGAAAAGAGAAAGTTGTAATTTTATGCCTCTTAGATCTTCATTTCTATTTTAATCATTTCTATTTTAAATGGTAGAAATTGAAACCTTTTTATTAAATATTTTATTAAATAGAAATAAAAAAATTTTTAAATCGTGGAGGAAGGGGGGGCGGATGTAGCCAAGTGGATCAAGGCAGTGGATTGTGAATCCACCATGAGCGAGCGAACGGATGCATGAGCTTGGTATGGAACCTACTAAGTGATAACTTTCAAATTCAGAGAAACCCTGGAATCAAAAATGGGCAATCCTGAGCCAAATCCTGTTTTACAAGAACAAACAAGGGTTCAGAAAGCGAAAAAAAAAAAGGGGGATAGGTGCAGAGACTCAACGGAAGCTGTTCTAAGAAATGGGGTTGACTGCCTTTTTTGGTAAAGAAAGGAAAAGAAATCCTTCTATCGAATATCGAAACTCCATAAAGGATGAAGGATAAGCGTATATACACTATGTATACACAATGAAAAACTATCTCAAAAATGACAACCGAATCCGTATTTTTTTTTATGAAAAAAAAAAAAATTGTTATGAATCAATTCCAAGTTGAAAAAAGAATCGAATATTCATTGATCAAATCATTCACTCCATAGTCTGATCGATCTTTTCTTTTGAAAAACTGATTAATCGGACAAGAATAAAGATAGAGTCCCATTCTACATGTCAATATCAATACCGGCAACAATGAAATTTAGAGTAAGAGGAAAATCCGTCGACTTTAGAAATCGTGAGGGTTCAAGTCCTCTTTCCCCCA
>LL05
ATCGTTGACTAGCTGCTATTGAGCCCCATCTACAAATGGATAATTCTGTCTTAGTGGAGACGAGTTTTTGAAAATAACGGAGAAATACCGACTCTCTTGCAAGAGAGTCGGTATTTCTCAGTTATTTTTTATGTTTTTCTTTAGTAGTTTTTTATTTCTATCTTTTTTTTACGAAAAGTATTTTTATGCTTTTGCTTTGATTTTGTCTGATATTTTTGTTATGGTTATGGGCTCATATTCGTTATGTACCAGTATAATAATATTAGTTATTTGTTAATCCCACTAATAAAGTTCTAATTTTATTAATTCGATTCTAATTTTCGAATTTTTTAGTTTTTTTAATATAAAATAAAAGAAAAGAGAAAGTTGTAATTTTATGCCTCTTAGATCTTCATTTCTATTTTAATCATTTCTATTTTAAATGGTAGAAATTGAAACCTTTTTATTAAATATTTTATTAAATAGAAATAAAAAAATTTTTAAATCGTGGAGGAAGGGGGGGCGGATGTAGCCAAGTGGATCAAGGCAGTGGATTGTGAATCCACCATGCGCGAGATGGATGAGCTTGGTATGGAACTACTAAGTGATAACTTTCAAATTCAGAGAAACCCTGGAATCAAAAATGGGCAATCCTGAGCCAAATCCTGTTTTACAAGAACAAACAAGGGTTCAGAAAGCGAAAAAAAAAAAGGGGGATAGGTGCAGAGACTCAACGGAAGCTGTTCTAAGAAATGGGGTTGACTGCCTTTTTTGGTAAAGAAAGGAAAAGAAATCCTTCTATCGAATATCGAAACTCCATAAAGGATGAAGGATAAGCGTATATACACTATGTATACACAATGAAAAACTATCTCAAAAATGACAACCGAATCCGTATTTTTTTTTATGAAAAAAAAAAAAATTGTTATGAATCAATTCCAAGTTGAAAAAAGAATCGAATATTCATTGATCAAATCATTCACTCCATAGTCTGATCGATCTTTTCTTTTGAAAAACTGATTAATCGGACAAAAATAAAGATAGAGTCCCATTCTACATGTCAATATCAATACCGGCAACAATGAAATTTAGAGTAAGAGGAAAATCCGTCGACTTTAGAAATCGTGAGGGTTCAAGTCCCTCTTTCCCAAA
>LL06
ATCTCTGACTAGCTGCTATTGAAGCCCCATCTACAAATGGATAATTCTGTCTTAGTGGAGACGAGTTTTTGAAAATAACGGAGAAATACCGACTCTCTTGCAAGAGAGTCGGTATTTCTCCGTTATTTTTTATGTTTTTCTTTAGTAGTTTTTTATTTCTATCTTTTTTTTACGAAAAGTATTTTTATGCTTTTGCTTTGATTTTGTCTGATATTTTTGTTATGGTTATGGGCTCATATTCGTTATGTACCAGTATAATAATATTAGTTATTTGTTAATCCCACTAATAAAGTTCTAATTTTATTAATTCGATTCTAATTTTCGAATTTTTTAGTTTTTTTAATATAAAATAAAAGAAAAGAGAAAGTTGTAATTTTATGCCTCTTAGATCTTCATTTCTATTTTAATCATTTCTATTTTAAATGGTAGAAATTGAAACCTTTTTATTAAATATTTTATTAAATAGAAATAAAAAAATTTTTAAATCGTGGAGGAAGGGGGGGCGGATGTAGCCAAGTGGATCAAGGCAGTGGATTGTGAATCCACCATACGCGAGGGATGGATGAGCTTGGTATGGACCTACTAAGTGATAACTTTCAAATTCAGAGAAACCCTGGAATCAAAAATGGGCAATCCTGAGCCAAATCCTGTTTTACAAGAACAAACAAGGGTTCAGAAAGCGAAAAAAAAAAAGGGGGATAGGTGCAGAGACTCAACGGAAGCTGTTCTAAGAAATGGGGTTGACTGCCTTTTTTGGTAAAGAAAGGAAAAGAAATCCTTCTATCGAATATCGAAACTCCATAAAGGATGAAGGATAAGCGTATATACACTATGTATACACAATGAAAAACTATCTCAAAAATGACAACCGAATCCGTATTTTTTTTTATGAAAAAAAAAAAAATTGTTATGAATCAATTCCAAGTTGAAAAAAGAATCGAATATTCATTGATCAAATCATTCACTCCATAGTCTGATCGATCTTTTCTTTTGAAAAACTGATTAATCGGACAAAAATAAAGATAGAGTCCCATTCTACATGTCAATATCAATACCGGCAACAATGAAATTTAGAGTAAGAGGAAAATCCGTCGACTTTAGAAATCGTGAGGGTTCAAGTCCTTCTTTCCCCCAA
>LL07
AATCTCTGACTAGCTGCTATTGAGCCCCATCTACAAATGGATAATTCTGTCTTAGTGGAGACGAGTTTTTGAAAATAACGGAGAAATACCGACTCTCTTGCAAGAGAGTCGGTATTTCTCCGTTATTTTTTATGTTTTTCTTTAGTAGTTTTTTATTTCTATCTTTTTTTTACGAAAAGTATTTTTATGCTTTTGCTTTGATTTTGTCTGATATTTTTGTTATGGTTATGGGCTCATATTCGTTATGTACCAGTATAATAATATTAGTTATTTGTTAATCCCACTAATAAAGTTCTAATTTTATTAATTCGATTCTAATTTTCGAATTTTTTAGTTTTTTTAATATAAAATAAAAGAAAAGAGAAAGTTGTAATTTTATGCCTCTTAGATCTTCATTTCTATTTTAATCATTTCTATTTTAAATGGTAGAAATTGAAACCTTTTTATTAAATATTTTATTAAATAGAAATAAAAAAATTTTTAAATCGTGGAGGAAGGGGGGGCGGATGTAGCCAAGTGGATCAAGGCAGTGGATTGTGAATCCACCATGCGCGAGGATGATGAGCTTGGTATGGAACCTACTAAGTGATAACTTTCAAATTCAGAGAAACCCTGGAATCAAAAATGGGCAATCCTGAGCCAAATCCTGTTTTACAAGAACAAACAAGGGTTCAGAAAGCGAAAAAAAAAAAGGGGGATAGGTGCAGAGACTCAACGGAAGCTGTTCTAAGAAATGGGGTTGACTGCCTTTTTTGGTAAAGAAAGGAAAAGAAATCCTTCTATCGAATATCGAAACTCCATAAAGGATGAAGGATAAGCGTATATACACTATGTATACACAATGAAAAACTATCTCAAAAATGACAACCGAATCCGTATTTTTTTTTATGAAAAAAAAAAAAATTGTTATGAATCAATTCCAAGTTGAAAAAAGAATCGAATATTCATTGATCAAATCATTCACTCCATAGTCTGATCGATCTTTTCTTTTGAAGAACTGATTAATCGGACAAGAATAAAGATAGAGTCCCATTCTACATGTCAATATCAATACCGGCAACAATGAAATTTAAAGTAAGAGGAAAATCCGTCGACTTTAGAAATCGTGAGGGTTCAAGTCCCTTCTATCCCAAA
>LL08
AATTCGCTGACTAGCTGCTATTGAGCCCCATCTACAAATGGATAATTCTGTCTTAGTGGAGACGAGTTTTTGAAAATAACGGAGAAATACCGACTCTCTTGCAAGAGAGTCGGTATTTCTCCGTTATTTTTTATGTTTTTCTTTAGTAGTTTTTTATTTCTATCTTTTTTTTGGGGCAGTATTTTTATGCTTTTGCTTTGATTTTGTCGGATATTTTTGTTATGGTTATGGGCTCATATTCGTTATGTACCAGTATAATAATATTAGTTATTTGTTAATCCCACTAATAAAGTTCTAATTTTATTAATTCGATTCTAATTTTCGAATTTTTTAGTTTTTTTAATATAAAATAAAAAAAAAGAGAAAGTTGGAATTTTATGCCTCTTAGATCTTCATTTCTATTTTAATCATTTCTATTTTAAATGGTAGAAATTGAAACCTTTTTATTAAATATTTTATTAAATAGAAATAAAAAAATTTTTAAATCGGGGAGGAAGGGGGGGCGGATGTAGCCAAGTGGATGAAGGCGGTGAATTGTTTATCGACCATCACGCGATCGAGGTGGGTGGATGAGCTTGGTATGGACTACTAAGTGATAACTTTCAAATTCAGAGAAACCCTGGAATCAAAAATGGGCAATCCTGAGCCAAATCCTGTTTTACAAGAACAAACAAGGGTTCAGAAAGCGAAAAAAAAAAAGGGGGATAGGTGCAGAGACTCAACGGAAGCTGTTCTAAGAAATGGGGTTGACTGCCTTTTTTGGTAAAGAAAGGAAAAGAAATCCTTCTATCGAATATCGAAACTCCATAAAGGATGAAGGATAAGCGTATATACACTATGTATACACAATGAAAAACTATCTCAAAAATGACAACCGAATCCGTATTTTTTTTTATGAAAAAAAAAAAAATTGTTATGAATCAATTCCAAGTTGAAAAAAGAATCGAATATTCATTGATCAAATCATTCACTCCATAGTCTGATCGATCTTTTCTTTTGAAAAACTGATTAATCGGACAAGAATAAAGATAGAGTCCCATTCTACATGTCAATATCAATACCGGCAACAATGAAATTTAAAGTAAGAGGAAAATCCGTCGACTTTAGAAATCGTGAGGGTTCAAGTCCCTCTTTCCCAAA
>LL09
ATCTCTGACTAGCTGCTATTGAGCCCCATCTACAAATGGATAATTCTGTCTTAGTGGAGACGAGTTTTTGAAAATAACGGAGAAATACCGACTCTCTTGCAAGAGAGTCGGTATTTCTCAGTTATTTTTTATGTTTTTCTTTAGTAGTTTTTTATTTCTATCTTTTTTTTACGAAAAGTATTTTTATGCTTTTGCTTTGATTTTGTCTGATATTTTTGTTATGGTTATGGGCTCATATTCGTTATGTACCAGTATAATAATATTAGTTATTTGTTAATCCCACTAATAAAGTTCTAATTTTATTAATTCGATTCTAATTTTCGAATTTTTTAGTTTTTTTAATATAAAATAAAAGAAAAGAGAAAGTTGTAATTTTATGCCTCTTAGATCTTCATTTCTATTTTAATCATTTCTATTTTAAATGGTAGAAATTGAAACCTTTTTATTAAATATTTTATTAAATAGAAATAAAAAAATTTTTAAATCGTGGAGGAAGGGGGGGCGGATGTAGCCAAGTGGATCAAGGCAGTGGATTGTGAATCCACCATGAAGCGAGATGGATGAGCTTGGTATGGAACCTACTAAGTGATAACTTTCAAATTCAGAGAAACCCTGGAATCAAAAATGGGCAATCCTGAGCCAAATCCTGTTTTACAAGAACAAACAAGGGTTCAGAAAGCGAAAAAAAAAAAGGGGGATAGGTGCAGAGACTCAACGGAAGCTGTTCTAAGAAATGGGGTTGACTGCCTTTTTTGGTAAAGAAAGGAAAAGAAATCCTTCTATCGAATATCGAAACTCCATAAAGGATGAAGGATAAGCGTATATACACTATGTATACACAATGAAAAACTATCTCAAAAATGACAACCGAATCCGTATTTTTTTTTATGAAAAAAAAAAAAATTGTTATGAATCAATTCCAAGTTGAAAAAAGAATCGAATATTCATTGATCAAATCATTCACTCCATAGTCTGATCGATCTTTTCTTTTGAAGAACTGATTAATCGGACAAGAATAAAGATAGAGTCCCATTCTACATGTCAATATCAATACCGGCAACAATGAAATTTAGAGTAAGAGGAAAATCCGTCGACTTTAGAAATCGTGAGGGTTCAAGTCCCTCTTTCCCAAA
>LL10
AGTCTCTGACTAGCTGCTATTGAGCCCCATCTACAAATGGATAATTCTGTCTTAGTGGAGACGAGTTTTTGAAAATAACGGAGAAATACCGACTCTCTTGCAAGAGAGTCGGTATTTCTCAGTTATTTTTTATGTTTTTCTTTAGTAGTTTTTTATTTCTATCTTTTTTTTACGAAAAGTATTTTTATGCTTTTGCTTTGATTTTGTCTGATATTTTTGTTATGGTTATGGGCTCATATTCGTTATGTACCAGTATAATAATATTAGTTATTTGTTAATCCCACTAATAAAGTTCTAATTTTATTAATTCGATTCTAATTTTCGAATTTTTTAGTTTTTTTAATATAAAATAAAAGAAAAGAGAAAGTTGTAATTTTATGCCTCTTAGATCTTCATTTCTATTTTAATCATTTCTATTTTAAATGGTAGAAATTGAAACCTTTTTATTAAATATTTTATTAAATAGAAATAAAAAAATTTTTAAATCGTGGAGGAAGGGGGGGCGGATGTAGCCAAGTGGATCAAGGCAGTGGATTGTGAATCCACCATACGCGAGCGAGTTTTGCATGGCTTGGTATGGAACCTACTAAGTGATAACTTTCAAATTCAGAGAAACCCTGGAATCAAAAATGGGCAATCCTGAGCCAAATCCTGTTTTACAAGAACAAACAAGGGTTCAGAAAGCGAAAAAAAAAAAGGGGGATAGGTGCAGAGACTCAACGGAAGCTGTTCTAAGAAATGGGGTTGACTGCCTTTTTTGGTAAAGAAAGGAAAAGAAATCCTTCTATCGAATATCGAAACTCCATAAAGGATGAAGGATAAGCGTATATACACTATGTATACACAATGAAAAACTATCTCAAAAATGACAACCGAATCCGTATTTTTTTTTATGAAAAAAAAAAAAATTGTTATGAATCAATTCCAAGTTGAAAAAAGAATCGAATATTCATTGATCAAATCATTCACTCCATAGTCTGATCGATCTTTTCTTTTGAAAAACTGATTAATCGGACAAAAATAAAGATAGAGTCCCATTCTACATGTCAATATCAATACCGGCAACAATGAAATTTAGAGTAAGAGGAAAATCCGTCGACTTTAGAAATCGTGAGGGTTCAGGTCCCTCTTTTCCCCAA
>SM01
ACTTCTCTGACTAGCTGCTATTGAGCCCCATCTACAAATGGATAATTCTGTCTTAGTGGAGACGAGTTTTTGAAAATAACGGAGAAATACCGACTCTCTTGCAAGAGAGTCGGTATTTCTCCGTTATTTTTTATGTTTTTCTTTAGTAGTTTTTTATTTCTATCTTTTTTTTACGAAAAGTATTTTTATGCTTTTGCTTTGATTTTGTCTGATATTTTTGTTATGGGTATGGGCTCATATTCGTTATGTACCAGTATAATAATATTAGTTATTTGTTAATCCCACTAATAAAGTTCTAATTTTATTAATTCGATTCTAATTTTCGAATTTTTTAGTTTTTTTAATATAAAATAAAAGAAAAGAGAAAGTTGTAATTTTATGCCTCTTAGATCTTCATTTCTATTTTAAATGGGAGAAATTGAAACCTTTTTATTAAATATTTTATTAAATAGAAATAAAAAAAATTTTAAATCGTGGAGGAAGGGGGGGCGGATGTAGCCAAGTGGATCAAGGCAGTGGATTGTGTATCCCCCATGAGCGAGAGAGGAGGATGGCTTGGTATGGAACTACTAAGTGATAACTTTCAAATTCAGAGAAACCCTGGAATCAAAAATGGGCAATCCTGAGCCAAATCCTGTTTTACAAGAACAAACAAGGGTTCAGAAAGCGAAAAAAAAAAAGGGGGATAGGTGCAGAGACTCAACGGAAGCTGTTCTAAGAAATGGGGTTGACTGCCTTTTTTGGTAAAGAAAGGAAAAGAAATCCTTCTATCGAATATCGAAACTCCATAAAGGATGAAGGATAAGCGTATATACACTATGTATACACAATGAAAAACTATCTCAAAAATGACAACCGAATCCGTATTTTTTTTTATGAAAAAAAAAAAAATTGTTATGAATCAATTCCAAGTTGAAAAAAGAATCGAATATTCATTGATCAAATCATTCACTCCATAGTCTGATCGATCTTTTCTTTTGAAAAACTGATTAATCGGACAAAAATAAAGATAGAGTCCCATTCTACATGTCAATATCAATACCGGCAACAATGAAATTTAGAGTAAGAGGAAAATCCGTCGACTTTAGAAATCGTGAGGGTTCAAGTCCCTCTTTCCCA
>SM02 
AATTCTCTTGACTAGCTGCTATTGAAGCCCCATCTACAAATGGATAATTCTGTCTTAGTGGAGACGAGTTTTTGAAAATAACGGAGAAATACCGACTCTCTTGCAAGAGAGTCGGTATTTCTCCGTTATTTTTTATGTTTTTCTTTAGTAGTTTTTTATTTCTATCTTTTTTTTACGAAAAGTATTTTTATGCTTTTGCTTTGATTTTGTCTGATATTTTTGTTATGGTTATGGGCTCATATTCGTTATGTACCAGTATAATAATATTAGTTATTTGTTAATCCCACTAATAAAGTTCTAATTTTATTAATTCGATTCTAATTTTCGAATTTTTTAGTTTTTTTAATATAAAATAAAAGAAAAGAGAAAGTTGTAATTTTATGCCTCTTAGATCTTCATTTCTATTTTAAATGGTAGAAATTGAAACCTTTTTATTAAATATTTTATTAAATAGAAATAAAAAAAATTTTAAATCGTGGAGGAAGGGGGGGCGGATGTAGCCAAGTGGATCAAGGCAGTGGATTGTGAATCCACCATGCGCGAGGATGCTGGCTTGGTATGGAACCTACTAAGTGATAACTTTCAAATTCAGAGAAACCCTGGAATCAAAAATGGGCAATCCTGAGCCAAATCCTGTTTTACAAGAACAAACAAGGGTTCAGAAAGCGAAAAAAAAAAGGGGGATAGGTGCAGAGACTCAACGGAAGCTGTTCTAAGAAATGGGGTTGACTGCCTTTTTTGGTAAAGAAAGGAAAAGAAATCCTTCTATCGAATATCGAAACTCCATAAAGGATGAAGGATAAGCGTATATACACTATGTATACACAATGAAAAACTATCTCAAAAATGACAACCGAATCCGTATTTTTTTTTATGAAAAAAAAAAGAATTGTTATGAATCAATTCCAAGTTGAAGAAAGAATCGAATATTCATTGATCAAATCATTCACTCCATAGTCTGATCGATCTTTTCTTTTGAAGAACTGATTAATCGGACAAGAATAAAGATAGAGTCCCATTCTACATGTCAATATCAATACCGGCAACAATGAAATTTAGAGTAAGAGGAAAATCCGTCGACTTTAGAAATCGTGAGGGTTCAAGTCCCTCTTTTCCCCAA
>SM03
AGTGTCAGACTAGCTGCTATTGAGCCCCATCTACAAATGGATAATTCTGTCTTAGTGGAGACGAGTTTTTGAAAATAACGGAGAAATACCGACTCTCTTGCAAGAGAGTCGGTATTTCTCCGTTATTTTTTATGTTTTTCTTTAGTAGTTTTTTATTTCTATCTTTTTTTTACGAAAAGTATTTTTATGCTTTTGCTTTGATTTTGTCTGATATTTTTGTTATGGTTATGGGCTCATATTCGTTATGTACCAGTATAATAATATTAGTTATTTGTTAATCCCACTAATAAAGTTCTAATTTTATTAATTCGATTCTAATTTTCGAATTTTTTAGTTTTTTTAATATAAAATAAAAGAAAAGAGAAAGTTGTAATTTTATGCCTCTTAGATCTTCATTTCTATTTTAAATGGTAGAAATTGAAACCTTTTTATTAAATATTTTATTAAATAGAAATAAAAAAAATTTTAAATCGTGGAGGAAGGGGGGGCGGATGTAGCCAAGTGGATCAAGGCAGTGGATTGTGAATCCACCATGAGCGAGGATGGATGGCTGGTATGGAACCTACTAAGTGATAACTTTCAAATTCAGAGAAACCCTGGAATCAAAAATGGGCAATCCTGAGCCAAATCCTGTTTTACAAGAACAAACAAGGGTTCAGAAAGCGAAAAAAAAAAAGGGGGATAGGTGCAGAGACTCAACGGAAGCTGTTCTAAAAAAGGGGGTTGACTGCCTTTTTTGGTAAAAAAAGGAAAAAAAATCCTTCTATCGAATATCGAAACTCCATAAAGGATGAAGGATAAGCGTATATACCCTATGTATACACAATGAAAAACTATCTCAAAAATGACAACCGAATCCGTATTTTTTTTTATGAAAAAAAAAAAAATTGTTATGAATCAATTCCAAGTTGAAAAAAGAATCGAATATTCTTTGATCAAATCATTCCCTCCATAGTCTGATCGATCTTTTCTTTTGAAAAACTGATTAATCGGACAAAAATAAAGATAGAGTCCCATTCTACATGTCAATATCAATACCGGCAACAATGAAATTTAGAGTAAGAGGAAAATCCGTCAACTTTAAAAATCGTGAGGGTTCAAGTCCCTCTATCCCAA
>SM04
ATTGTCTGACTAGCTGCTATTGAGCCCCATCTACAAATGGATAATTCTGTCTTAGTGGAGACGAGTTTTTGAAAATAACGGAGAAATACCGACTCTCTTGCAAGAGAGTCGGTATTTCTCCGTTATTTTTTATGTTTTTCTTTAGTAGTTTTTTATTTCTATCTTTTTTTTACGAAAAGTATTTTTATGCTTTTGCTTTGATTTTGTCTGATATTTTTGTTATGGTTATGGGCTCATATTCGTTATGTACCAGTATAATAATATTAGTTATTTGTTAATCCCACTAATAAAGTTCTAATTTTATTAATTCGATTCTAATTTTCGAATTTTTTAGTTTTTTTAATATAAAATAAAAGAAAAGAGAAAGTTGTAATTTTATGCCTCTTAGATCTTCATTTCTATTTTAAATGGTAGAAATTGAAACCTTTTTATTAAATATTTTATTAAATAGAAATAAAAAAAATTTTAAATCGTGGAGGAAGGGGGGGCGGATGTAGCCAAGTGGATCAAGGCAGTGGATTGTGAATCCACCATGAAGCGAGCATGGATGAGCTTGGTATGGAACCTACTAAGTGATAACTTTCAAATTCAGAGAAACCCTGGAATCAAAAATGGGCAATCCTGAGCCAAATCCTGTTTTACAAGAACAAACAAGGGTTCAGAAAGCGAAAAAAAAAAAGGGGGATAGGTGCAGAGACTCAACGGAAGCTGTTCTAAGAAATGGGGTTGACTGCCTTTTTTGGTAAAGAAAGGAAAAGAAATCCTTCTATCGAATATCGAAACTCCATAAAGGATGAAGGATAAGCGTATATACACTATGTATACACAATGAAAAACTATCTCAAAAATGACAACCGAATCCGTATTTTTTTTTATGAAAAAAAAAAAAATTGTTATGAATCAATTCCAAGTTGAAAAAAGAATCGAATATTCATTGATCAAATCATTCACTCCATAGTCTGATCGATCTTTTCTTTTGAAAAACTGATTAATCGGACAAAAATAAAGATAGAGTCCCATTCTACATGTCAATATCAATACCGGCAACAATGAAATTTAGAGTAAGAGGAAAATCCGTCGACTTTAAAAATCGTGAGGGTTCAAGTCCCTCCTTCCCCAA
>SM05
AGCGCTGACTAGCTGCTATTGAGCCCCATCTACAAATGGATAATTCTGTCTTAGTGGAGACGAGTTTTTGAAAATAACGGAGAAATACCGACTCTCTTGCAAGAGAGTCGGTATTTCTCCGTTATTTTTTATGTTTTTCTTTAGTAGTTTTTTATTTCTATCTTTTTTTTACGAAAAGTATTTTTATGCTTTTGCTTTGATTTTGTCTGATATTTTTGTTATGGTTATGGGCTCATATTCGTTATGTACCAGTATAATAATATTAGTTATTTGTTAATCCCACTAATAAAGTTCTAATTTTATTAATTCGATTCTAATTTTCGAATTTTTTAGTTTTTTTAATATAAAATAAAAGAAAAGAGAAAGTTGTAATTTTATGCCTCTTAGATCTTCATTTCTATTTTAAATGGTAGAAATTGAAACCTTTTTATTAAATATTTTATTAAATAGAAATAAAAAAAATTTTAAATCGTGGAGGAAGGGGGGGCGGATGTAGCCAAGTGGATCAAGGCAGTGGATTGTGAATCCACCATGAAGCGACGGATGGATGAGCTTGGTATGGAACCTACTAAGTGATAACTTTCAAATTCAGAGAAACCCTGGAATCAAAAATGGGCAATCCTGAGCCAAATCCTGTTTTACAAGAACAAACAAGGGTTCAGAAAGCGAAAAAAAAAAAGGGGGATAGGTGCAGAGACTCAACGGAAGCTGTTCTAAGAAATGGGGTTGACTGCCTTTTTTGGTAAAGAAAGGAAAAGAAATCCTTCTATCGAATATCGAAACTCCATAAAGGATGAAGGATAAGCGTATATACACTATGTATACACAATGAAAAACTATCTCAAAAATGACAACCGAATCCGTATTTTTTTTTATGAAAAAAAAAAAAATTGTTATGAATCAATTCCAAGTTGAAAAAAGAATCGAATATTCATTGATCAAATCATTCACTCCATAGTCTGATCGATCTTTTCTTTTGAAAAACTGATTAATCGGACAAAAATAAAGATAGAGTCCCATTCTACATGTCAATATCAATACCGGCAACAATGAAATTTAGAGTAAGAGGAAAATCCGTCAACTTTAGAAATCGTGAGGGTTCAAGTCCCTCTTTCCCACA
>SM06
AATTCGCTTGACTAGCTGCTATTGAGCCCCATCTACAAATGGATAATTCTGTCTTAGTGGAGACGAGTTTTTGAAAATAACGGAGAAATACCGACTCTCTTGCAAGAGAGTCGGTATTTCTCCGTTATTTTTTATGTTTTTCTTTAGTAGTTTTTTATTTCTATCTTTTTTTTACGAAAAGTATTTTTATGCTTTTGCTTTGATTTTGTCTGATATTTTTGTTATGGTTATGGGCTCATATTCGTTATGTACCAGTATAATAATATTAGTTATTTGTTAATCCCACTAATAAAGTTCTAATTTTATTAATTCGATTCTAATTTTCGAATTTTTTAGTTTTTTTAATATAAAATAAAAGAAAAGAGAAAGTTGTAATTTTATGCCTCTTAGATCTTCATTTCTATTTTAAATGGTAGAAATTGAAACCTTTTTATTAAATATTTTATTAAATAGAAATAAAAAAAATTTTAAATCGTGGAGGAAGGGGGGGCGGATGTAGCCAAGTGGATCAAGGCAGTGGATTGTGAATCCACCATGCGCGAGCAGTTCAATTCCCGTCGTACGCCCATTAAATGGAACCCGGATTGTGAATCCACCATACGCGAGATAACAACGGAGAAAGAAGAGACTTTCCACCCGGCTGGAATTCACCGCTTATGTGTGGATAGCCGACAGATTATATGCTTTGCTCTCCCGCTTTCACCCACAACGCAGCCCGGACGAATTTTGCCCGTTCCCCTACGGGGTATCGGTAAAAGGCTTAAAACTTGCGGATCTTACATTAAGTTTCAAATTCCATCGTCTTACCCGGAGCTCTCAATATCTGGGGAATCTGTGGGGTTGAGACTATTATCTTTTCAAACTTAAAAATATTATGAAAAAGACGAATTTACCGTTGTAATCCCCGATCTTCCCCTATCTCTCTTCGAACACAGATACTACATTTCGATTAAAGCCTGGTATTAAGCCTTTAGTAAAAAAATTTCTTATCTGGCACGGGGCATGAGCTGGTATGGAACTACTAAGTGATAACTTTCAAATTCAGAGAAACCCTGGAATCAAAAATGGGCAATCCTGAGCCAAATCCTGTTTTACAAGAACAAACAAGGGTTCAGAAAGCGAAAAAAAAAAAGGGGGATAGGTGCAGAGACTCAACGGAAGCTGTTCTAAGAAATGGGGTTGACTGCCTTTTTTGGTAAAGAAAGGAAAAGAAATCCTTCTATCGAATATCGAAACTCCATAAAGGATGAAGGATAAGCGTATATACACTATGTATACACAATGAAAAACTATCTCAAAAATGACAACCGAATCCGTATTTTTTTTTATGAAAAAAAAAAAAATTGTTATGAATCAATTCCAAGTTGAAAAAAGAATCGAATATTCATTGATCAAATCATTCACTCCATAGTCTGATCGATCTTTTCTTTTGAAAAACTGATTAATCGGACAAAAATAAAGATAGAGTCCCATTCTACATGTCAATATCAATACCGGCAACAATGAAATTTAGAGTAAGAGGAAAATCCGTCGACTTTAGAAATCGTGAGGGTTCAAGTCCCTTCTATCCCCAATAAC
>SM07
ATCACTGACTAGCTGCTATTGAGCCCCATCTACAAATGGATAATTCTGTCTTAGTGGAGACGAGTTTTTGAAAATAACGGAGAAATACCGACTCTCTTGCAAGAGAGTCGGTATTTCTCCGTTATTTTTTATGTTTTTCTTTAGTAGTTTTTTATTTCTATCTTTTTTTTACGAAAAGTATTTTTATGCTTTTGCTTTGATTTTGTCTGATATTTTTGTTATGGTTATGGGCTCATATTCGTTATGTACCAGTATAATAATATTAGTTATTTGTTAATCCCACTAATAAAGTTCTAATTTTATTAATTCGATTCTAATTTTCGAATTTTTTAGTTTTTTTAATATAAAATAAAAGAAAAGAGAAAGTTGTAATTTTATGCCTCTTAAATCTTCATTTCTATTTTAAATGGTAGAAATTGAAACCTTTTTATTAAATATTTTATTAAATAGAAATAAAAAAAATTTTAAATCGTGGAGGAAGGGGGGGCGGATGTAGCCAAGTGGATCAAGGCAGTGGATTGTGAATCCACCATGACGCGAGAATGGATGAGCTTGGTATGGAACCTACTAAGTGATAACTTTCAAATTCAGAGAAACCCTGGAATCAAAAATGGGCAATCCTGAGCCAAATCCTGTTTTACAAGAACAAACAAGGGTTCAGAAAGCGAAAAAAAAAAAGGGGGATAGGTGCAGAGACTCAACGGAAGCTGTTCTAAGAAATGGGGTTGACTGCCTTTTTTGGTAAAGAAAGGAAAAGAAATCCTTCTATCGAATATCGAAACTCCATAAAGGATGAAGGATAAGCGTATATACACTATGTATACACAATGAAAAACTATCTCAAAAATGACAACCGAATCCGTATTTTTTTTTATGAAAAAAAAAAAAATTGTTATGAATCAATTCCAAGTTGAAAAAAGAATCGAATATTCATTGATCAAATCATTCACTCCATAGTCTGATCGATCTTTTCTTTTGAAAAACTGATTAATCGGACAAAAATAAAGATAGAGTCCCATTCTACATGTCAATATCAATACCGGCAACAATGAAATTTAGAGTAAGAGGAAAATCCGTCAACTTTAGAAATCGTGAGGGTTCAAGTCCCTCCTTTCCCAAA
>SM08
ATTTCTCAGACTAGCTGCTATTGAGCCCCATCTACAAATGGATAATTCTGTCTTAGTGGAGACGAGTTTTTGAAAATAACGGAGAAATACCGACTCTCTTGCAAGAGAGTCGGTATTTCTCCGTTATTTTTTATGTTTTTCTTTAGTAGTTTTTTATTTCTATCTTTTTTTTACGAAAAGTATTTTTATGCTTTTGCTTTGATTTTGTCTGATATTTTTGTTATGGTTATGGGCTCATATTCGTTATGTACCAGTATAATAATATTAGTTATTTGTTAATCCCACTAATAAAGTTCTAATTTTATTAATTCGATTCTAATTTTCGAATTTTTTAGTTTTTTTAATATAAAATAAAAGAAAAGAGAAAGTTGTAATTTTATGCCTCTTAGATCTTCATTTCTATTTTAAATGGTAGAAATTGAAACCTTTTTATTAAATATTTTATTAAATAGAAATAAAAAAAATTTTAAATCGTGGAGGAAGGGGGGGCGGATGTAGCCAAGTGGATCAAGGCAGTGGATTGTGAATCCACCATGCGCGAGGGATGGATGAGCTTGGTATGGACTACTAAGTGATAACTTTCAAATTCAGAGAAACCCTGGAATCAAAAATGGGCAATCCTGAGCCAAATCCTGTTTTACAAGAACAAACAAGGGTTCAGAAAGCGAAAAAAAAAAGGGGGATAGGTGCAGAGACTCAACGGAAGCTGTTCTAAGAAATGGGGTTGACTGCCTTTTTTGGTAAAGAAAGGAAAAGAAATCCTTCTATCGAATATCGAAACTCCATAAAGGATGAAGGATAAGCGTATATACACTATGTATACACAATGAAAAACTATCTCAAAAATGACAACCGAATCCGTATTTTTTTTTATGAAAAAAAAAAGAATTGTTATGAATCAATTCCAAGTTGAAGAAAGAATCGAATATTCATTGATCAAATCATTCACTCCATAGTCTGATCGATCTTTTCTTTTGAAGAACTGATTAATCGGACAAGAATAAAGATAGAGTCCCATTCTACATGTCAATATCAATACCGGCAACAATGAAATTTAGAGTAAGAGGAAAATCCGTCGACTTTAGAAATCGTGAGGGTTCAAGTCCCTCCTTTCCCCAA
>SM09
TCTCTGACTAGCTGCTATTGAGCCCCATCTACAAATGGATAATTCTGTCTTAGTGGAGACGAGTTTTTGAAAATAACGGAGAAATACCGACTCTCTTGCAAGAGAGTCGGTATTTCTCCGTTATTTTTTATGTTTTTCTTTAGTAGTTTTTTATTTCTATCTTTTTTTTACGAAAAGTATTTTTATGCTTTTGCTTTGATTTTGTCTGATATTTTTGTTATGGTTATGGGCTCATATTCGTTATGTACCAGTATAATAATATTAGTTATTTGTTAATCCCACTAATAAAGTTCTAATTTTATTAATTCGATTCTAATTTTCGAATTTTTTAGTTTTTTTAATATAAAATAAAAGAAAAGAGAAAGTTGTAATTTTATGCCTCTTAGATCTTCATTTCTATTTTAAATGGTAGAAATTGAAACCTTTTTATTAAATATTTTATTAAATAGAAATAAAAAAAATTTTAAATCGTGGAGGAAGGGGGGGCGGATGTAGCCAAGTGGATCAAGGCAGTGGATTGTGAATCCACCATGCGCGAGATGGATGAGCTTGGTATGGACTACTAAGTGATAACTTTCAAATTCAGAGAAACCCTGGAATCAAAAATGGGCAATCCTGAGCCAAATCCTGTTTTACAAGAACAAACAAGGGTTCAGAAAGCGAAAAAAAAAAAGGGGGATAGGTGCAGAGACTCAACGGAAGCTGTTCTAAGAAATGGGGTTGACTGCCTTTTTTGGTAAAGAAAGGAAAAGAAATCCTTCTATCGAATATCGAAACTCCATAAAGGATGAAGGATAAGCGTATATACACTATGTATACACAATGAAAAACTATCTCAAAAATGACAACCGAATCCGTATTTTTTTTTATGAAAAAAAAAAAAATTGTTATGAATCAATTCCAAGTTGAAAAAAGAATCGAATATTCATTGATCAAATCATTCACTCCATAGTCTGATCGATCTTTTCTTTTGAAAAACTGATTAATCGGACAAAAATAAAGATAGAGTCCCATTCTACATGTCAATATCAATACCGGCAACAATGAAATTTAGAGTAAGAGGAAAATCCGTCAACTTTAGAAATCGTGAGGGTTCAAGTCCCTCTTTCCCCAA
>SM10
ATTCTCTGACTAGCTGCTATTGAGCCCCATCTACAAATGGATAAATTCTGTCTTAGTGGAGACGAGTTTTTGAAAATAACGGAGAAATACCGACTCTCTTGCAAGAGAGTCGGTATTTCTCCGTTATTTTTTATGTTTTTCTTTAGTAGTTTTTTATTTCTATCTTTTTTTTACGAAAAGTATTTTTATGCTTTTGCTTTGATTTTGTCTGATATTTTTGTTATGGTTATGGGCTCATATTCGTTATGTACCAGTATAATAATATTAGTTATTTGTTAATCCCACTAATAAAGTTCTAATTTTATTAATTCGATTCTAATTTTCGAATTTTTTAGTTTTTTTAATATAAAATAAAAGAAAAGAGAAAGTTGTAATTTTATGCCTCTTAGATCTTCATTTCTATTTTAAATGGTAGAAATTGAAACCTTTTTATTAAATATTTTATTAAATAGAAATAAAAAAAATTTTAAATCGTGGAGGAAGGGGGGGCGGATGTAGCCAAGTGGATCAAGGCAGTGGATTGTGAATCCACCATGAAGCGAGGGATGATGAGCTTGGTATGGACTACTAAGTGATAACTTTCAAATTCAGAGAAACCCTGGAATCAAAAATGGGCAATCCTGAGCCAAATCCTGTTTTACAAGAACAAACAAGGGTTCAGAAAGCGAAAAAAAAAAGGGGGATAGGTGCAGAGACTCAACGGAAGCTGTTCTAAGAAATGGGGTTGACTGCCTTTTTTGGTAAAGAAAGGAAAAGAAATCCTTCTATCGAATATCGAAACTCCATAAAGGATGAAGGATAAGCGTATATACACTATGTATACACAATGAAAAACTATCTCAAAAATGACAACCGAATCCGTATTTTTTTTTATGAAAAAAAAAAGAATTGTTATGAATCAATTCCAAGTTGAAAAAAGAATCGAATATTCATTGATCAAATCATTCACTCCATAGTCTGATCGATCTTTTCTTTTGAAGAACTGATTAATCGGACAAGAATAAAGATAGAGTCCCATTCTACATGTCAATATCAATACCGGCAACAATGAAATTTAGAGTAAGAGGAAAATCCGTCGACTTTAGAAATCGTGAGGGTTCAAGTCCTCCTTTCCCCCA
>SM11
ATTCTCTGACTAGCTGCTATTGAAGCCCCATCTACAAATGGATAATTCTGTCTTAGTGGAGACGAGTTTTTGAAAATAACGGAGAAATACCGACTCTCTTGCAAGAGAGTCGGTATTTCTCCGTTATTTTTTATGTTTTTCTTTAGTAGTTTTTTATTTCTATCTTTTTTTTACGAAAAGTATTTTTATGCTTTTGCTTTGATTTTGTCTGATATTTTTGTTATGGTTATGGGCTCATATTCGTTATGTACCAGTATAATAATATTAGTTATTTGTTAATCCCACTAATAAAGTTCTAATTTTATTAATTCGATTCTAATTTTCGAATTTTTTAGTTTTTTTAATATAAAATAAAAGAAAAGAGAAAGTTGTAATTTTATGCCTCTTAGATCTTCATTTCTATTTTAAATGGTAGAAATTGAAACCTTTTTATTAAATATTTTATTAAATAGAAATAAAAAAAATTTTAAATCGTGGAGGAAGGGGGGGCGGATGTAGCCAAGTGGATCAAGGCAGTGGATTGTGAATCCACCATGCGCGATGGATGATGAGCTTGGTATGGACTACTAAGTGATAACTTTCAAATTCAGAGAAACCCTGGAATCAAAAATGGGCAATCCTGAGCCAAATCCTGTTTTACAAGAACAAACAAGGGTTCAGAAAGCGAAAAAAAAAAGGGGGATAGGTGCAGAGACTCAACGGAAGCTGTTCTAAGAAATGGGGTTGACTGCCTTTTTTGGTAAAGAAAGGAAAAGAAATCCTTCTATCGAATATCGAAACTCCATAAAGGATGAAGGATAAGCGTATATACACTATGTATACACAATGAAAAACTATCTCAAAAATGACAACCGAATCCGTATTTTTTTTTATGAAAAAAAAAAGAATTGTTATGAATCAATTCCAAGTTGAAGAAAGAATCGAATATTCATTGATCAAATCATTCACTCCATAGTCTGATCGATCTTTTCTTTTGAAGAACTGATTAATCGGACAAGAATAAAGATAGAGTCCCATTCTACATGTCAATATCAATACCGGCAACAATGAAATTTAGAGTAAGAGGAAAATCCGTCGACTTTAGAAATCGTGAGGGTTCAAGTCCCTCTTTCCCCAA
>SC01
ATTCGCTGACTAGCTGCTATTGAGCCCCATCTACAAATGGATAATTCTGTCTTAGTGGAGACGAGTTTTTGAAAATAACGGAGAAATACCGACTCTCTTGCAAGAGAGTCGGTATTTCTCAGTTATTTTTTATGTTTTTCTTTAGTAGTTTTTTATTTCTATCCTTTTTTTACGAAAAGTATTTTTATGCTTTTGCTTTGATTTTGTCTGATATTTTTGTTATGGTTATGGGCTCATATTCGTTATGTACCAGTATAATAATATTAGTTATTTGTTAATCCCACTAATAAAGTTCTAATTTTATTAATTCGATTCTAATTTTCGAATTTTTTAGTTTTTTTAATAGAAAATAAAAGAAAAGAGAAAGTTGTAATTTTATGCCTCTTAGATCTTCATTTCTATTTTAAATGGTAGAAATTGAAACCTTTTTATTAAATATTTTATTAAATAGAAATAAAAAAAATTTTAAATCGTGGAGGAAGGGGGGGCGGATGTAGCCAAGTGGATCAAGGCAGTGGATTGTGAATCCACCATGCACGACGATGGATGAGCTTGGTATGGACTACTAAGTGATAACTTTCAAATTCAGAGAAACCCTGGAATCAAAAATGGGCAATCCTGAGCCAAATCCTGTTTTACAAGAACAAACAAGGGTTCAGAAAGCGAAAAAAAAAGAAGGGGATAGGTGCAGAGACTCAACGGAAGCTGTTCTAAGAAATGGGGTTGACTGCCTTTTTTGGTAAAGAAAGGAAAAGAAATCCTTCTATCGAATATCGAAACTCCATAAAGGATGAAGGATAAGCGTATATACACTATGTATACACAATGAAAAACTATCTCAAAAATGACAACCGAATCCGTATTTTTTTTATGAAAAAGAAAAGAATTGTTATGAATCAATTCCAAGTTGAAGAAAGAATCGAATATTCATTGATCAAATCATTCACTCCATAGTCTGATCGATCTTTTCTTTTGAAGAACTGATTAATCGGACAAGAATAAAGATAGAGTCCCATTCTACATGTCAATATCAATACCGGCAACAATGAAATTTAGAGTAAGAGGAAAATCCGTCGACTTTAGAAATCGTGAGGGTTCAAGTCCCTTTCTATCCCCCCAGA
>SC02
ATTCCTCAGACTAGCTGCTATTGAGCCCCATCTACAAATGGATAATTCTGTCTTAGTGGAGACGAGTTTTTGAAAATAACGGAGAAATACCGACTCTCTTGCAAGAGAGTCGGTATTTCTCAGTTATTTTTTATGTTTTTCTTTAGTAGTTTTTTATTTCTATCCTTTTTTTACGAAAAGTATTTTTATGCTTTTGCTTTGATTTTGTCTGATATTTTTGTTATGGTTATGAGCTCATATTCGTTATGTACCAGTATAATAATATTAGTTATTTGTTAATCCCACTAATAAAGTTCTAATTTTATTAATTCGATTCTAATTTTCGAATTTTTTAGTTTTTTTAATAGAAAATAAAAGAAAAGAGAAAGTTGTAATTTTATGCCTCTTAGATCTTCATTTCTATTTTAAATGGTAGAAATTGAAACCTTTTTATTAAATATTTTATTAAATAGAAATAAAAAAAATTTTAAATCGTGGAGGAAGGGGGGGCGGATGTAGCCAAGTGGATCAAGGCAGTGGATTGTGAATCCACCATGCACGATGGGGTTTGGAACCTACTAAGTGATAACTTTCAAATTCAGAGAAACCCTGGAATCAAAAATGGGCAATCCTGAGCCAAATCCTGTTTTACAAGAACAAACAAGGGTTCAGAAAGCGAAAAAAAAAGAAGGGGATAGGTGCAGAGACTCAACGGAAGCTGTTCTAAGAAATGGGGTTGACTGCCTTTTTTGGTAAAGAAAGGAAAAGAAATCCTTCTATCGAATATCGAAACTCCATAAAGGATGAAGGATAAGCGTATATACACTATGTATACACAATGAAAAACTATCTCAAAAATGACAACCGAATCCGTATTTTTTTTATGAAAAAGAAAAGAATTGTTATGAATCAATTCCAAGTTGAAGAAAGAATCGAATATTCATTGATCAAATCATTCACTCCATAGTCTGATCGATCTTTTCTTTTGAAGAACTGATTAATCGGACAAGAATAAAGATAGAGTCCCATTCTACATGTCAATATCAATACCGGCAACAATGAAATTTAGAGTAAGAGGAAAATCCGTCGACTTTAGAAATCGTGAGGGTTCAAGTCCCTCTATCCCCAA
>SC03
AATTCTCTGACTAGCTGCTATTGAGCCCCATCTACAAATGGATAATTCTGTCTTAGTGGAGACGAGTTTTTGAAAATAACGGAGAAATACCGACTCTCTTGCAAGAGAGTCGGTATTTCTCCGTTATTTTTTATGTTTTTCTTTAGTAGTTTTTTATTTCTATCCTTTTTTTACGAAAAGTATTTTTATGCTTTTGCTTTGATTTTGTCTGATATTTTTGTTATGGTTATGGGCTCATATTCGTTATGTACCAGTATAATAATATTAGTTATTTGTTAATCCCACTAATAAAGTTCTAATTTTATTAATTCGATTCTAATTTTCGAATTTTTTAGTTTTTTTAATAGAAAATAAAAGAAAAGAGAAAGTTGTAATTTTATGCCTCTTAGATCTTCATTTCTATTTTAAATGGTAGAAATTGAAACCTTTTTATTAAATATTTTATTAAATAGAAATAAAAAAAATTTTAAATCGTGGAGGAAGGGGGGGCGGATGTAGCCAAGTGGATCAAGGCAGTGGATTGTGAATCCACCATGCACGAGGATGGATGAGCTTGGTATGGAACTACTAAGTGATAACTTTCAAATTCAGAGAAACCCTGGAATCAAAAATGGGCAATCCTGAGCCAAATCCTGTTTTACAAGAACAAACAAGGGTTCAGAAAGCGAAAAAAAAAGAAGGGGATAGGTGCAGAGACTCAACGGAAGCTGTTCTAAGAAATGGGGTTGACTGCCTTTTTTGGTAAAGAAAGGAAAAGAAATCCTTCTATCGAATATCGAAACTCCATAAAGGATGAAGGATAAGCGTATATACACTATGTATACACAATGAAAAACTATCTCAAAAATGACAACCGAATCCGTATTTTTTTTATGAAAAAGAAAAGAATTGTTATGAATCAATTCCAAGTTGAAGAAAGAATCGAATATTCATTGATCAAATCATTCACTCCATAGTCTGATCGATCTTTTCTTTTGAAGAACTGATTAATCGGACAAGAATAAAGATAGAGTCCCATTCTACATGTCAATATCAATACCGGCAACAATGAAATTTAGAGTAAGAGGAAAATCCGTCGACTTTAGAAATCGTGAGGGTTCAAGTCCCTCCTATTCCCCCA
>SC04
ATCCATCTGACTAGCTGCTATTGAGCCCCATCTACAAATGGATAATTCTGTCTTAGTGGAGACGAGTTTTTGAAAATAACGGAGAAATACCGACTCTCTTGCAAGAGAGTCGGTATTTCTCAGTTATTTTTTATGTTTTTCTTTAGTAGTTTTTTATTTCTATCCTTTTTTTACGAAAAGTATTTTTATGCTTTTGCTTTGATTTTGTCTGATATTTTTGTTATGGTTATGAGCTCATATTCGTTATGTACCAGTATAATAATATTAGTTATTTGTTAATCCCACTAATAAAGTTCTAATTTTATTAATTCGATTCTAATTTTCGAATTTTTTAGTTTTTTTAATAGAAAATAAAAGAAAAGAGAAAGTTGTAATTTTATGCCTCTTAGATCTTCATTTCTATTTTAAATGGTAGAAATTGAAACCTTTTTATTAAATATTTTATTAAATAGAAATAAAAAAAATTTTAAATCGTGGAGGAAGGGGGGGCGGATGTAGCCAAGTGGATCAAGGCAGTGGATTGTGAATCCACCATGCACGATGAGTCCCATTCCCGTCGGTCGCCCATCCGTTGAGCCCAGATTTGTAACTCCCGCAATGAGGGAATCCAGAAGTTTACGGAATGGATGAGCTTGGTATGGAACCTACTAAGTGATAACTTTCAAATTCAGAGAAACCCTGGAATCAAAAATGGGCAATCCTGAGCCAAATCCTGTTTTACAAGAACAAACAAGGGTTCAGAAAGCGAAAAAAAAAGAAGGGGATAGGTGCAGAGACTCAACGGAAGCTGTTCTAAGAAATGGGGTTGACTGCCTTTTTTGGTAAAGAAAGGAAAAGAAATCCTTCTATCGAATATCGAAACTCCATAAAGGATGAAGGATAAGCGTATATACACTATGTATACACAATGAAAAACTATCTCAAAAATGACAACCGAATCCGTATTTTTTTTATGAAAAAGAAAAGAATTGTTATGAATCAATTCCAAGTTGAAGAAAGAATCGAATATTCATTGATCAAATCATTCACTCCATAGTCTGATCGATCTTTTCTTTTGAAGAACTGATTAATCGGACAAGAATAAAGATAGAGTCCCATTCTACATGTCAATATCAATACCGGCAACAATGAAATTTAGAGTAAGAGGAAAATCCGTCGACTTTAGAAATCGTGAGGGTTCAAGTCCCTTCTATCCCCCA
>SC05
ATTCGTCTGACTAGCTGCTATTGAGCCCCATCTACAAATGGATAATTCTGTCTTAGTGGAGACGAGTTTTTGAAAATAACGGAGAAATACCGACTCTCTTGCAAGAGAGTCGGTATTTCTCCGTTATTTTTTATGTTTTTCTTTAGTAGTTTTTTATTTCTATCCTTTTTTTACGAAAAGTATTTTTATGCTTTTGCTTTGATTTTGTCTGATATTTTTGTTATGGTTATGGGCTCATATTCGTTATGTACCAGTATAATAATATTAGTTATTTGTTAATCCCACTAATAAAGTTCTAATTTTATTAATTCGATTCTAATTTTCGAATTTTTTAGTTTTTTTAATAGAAAATAAAAGAAAAGAGAAAGTTGTAATTTTATGCCTCTTAGATCTTCATTTCTATTTTAAATGGTAGAAATTGAAACCTTTTTATTAAATATTTTATTAAATAGAAATAAAAAAAATTTTAAATCGTGGAGGAAGGGGGGGCGGATGTAGCCAAGTGGATCAAGGCAGTGGATTGTGAATCCACCATGCGCGACGGATGGATGAGCTTGGTATGGAACCTACTAAGTGATAACTTTCAAATTCAGAGAAACCCTGGAATCAAAAATGGGCAATCCTGAGCCAAATCCTGTTTTACAAGAACAAACAAGGGTTCAGAAAGCGAAAAAAAAAGAAGGGGATAGGTGCAGAGACTCAACGGAAGCTGTTCTAAGAAATGGGGTTGACTGCCTTTTTTGGTAAAGAAAGGAAAAGAAATCCTTCTATCGAATATCGAAACTCCATAAAGGATGAAGGATAAGCGTATATACACTATGTATACACAATGAAAAACTATCTCAAAAATGACAACCGAATCCGTATTTTTTTTATGAAAAAGAAAAGAATTGTTATGAATCAATTCCAAGTTGAAGAAAGAATCGAATATTCATTGATCAAATCATTCACTCCATAGTCTGATCGATCTTTTCTTTTGAAGAACTGATTAATCGGACAAGAATAAAGATAGAGTCCCATTCTACATGTCAATATCAATACCGGCAACAATGAAATTTAGAGTAAGAGGAAAATCCGTCGACTTTAGAAATCGTGAGGGTTCAAGTCCCTTCTATCCCCCCA
>SC06
AGATCGTGTGGACTAGCTGCTATTGAGCCCCATCTACAAATGGATAATTCTGTCTTAGTGGAGACGAGTTTTTGAAAATAACGGAGAAATACCGACTCTCTTGCAAGAGAGTCGGTATTTCTCCGTTATTTTTTATGTTTTTCTTTAGTAGTTTTTTATTTCTATCCTTTTTTTACGAAAAGTATTTTTATGCTTTTGCTTTGATTTTGTCTGATATTTTTGTTATGGTTATGGGCTCATATTCGTTATGTACCAGTATAATAATATTAGTTATTTGTTAATCCCACTAATAAAGTTCTAATTTTATTAATTCGATTCTAATTTTCGAATTTTTTAGTTTTTTTAATAGAAAATAAAAGAAAAGAGAAAGTTGTAATTTTATGCCTCTTAGATCTTCATTTCTATTTTAAATGGTAGAAATTGAAACCTTTTTATTAAATATTTTATTAAATAGAAATAAAAAAAATTTTAAATCGTGGAGGAAGGGGGGGCGGATGTAGCCAAGTGGATCAAGGCAGTGGATTGTGAATCCACCATGCACGAGGGGGATGATGAGCTTGGTATGGAACTACTAAGTGATAACTTTCAAATTCAGAGAAACCCTGGAATCAAAAATGGGCAATCCTGAGCCAAATCCTGTTTTACAAGAACAAACAAGGGTTCAGAAAGCGAAAAAAAAAGAAGGGGATAGGTGCAGAGACTCAACGGAAGCTGTTCTAAGAAATGGGGTTGACTGCCTTTTTTGGTAAAGAAAGGAAAAGAAATCCTTCTATCGAATATCGAAACTCCATAAAGGATGAAGGATAAGCGTATATACACTATGTATACACAATGAAAAACTATCTCAAAAATGACAACCGAATCCGTATTTTTTTTATGAAAAAGAAAAGAATTGTTATGAATCAATTCCAAGTTGAAGAAAGAATCGAATATTCATTGATCAAATCATTCACTCCATAGTCTGATCGATCTTTTCTTTTGAAGAACTGATTAATCGGACAAGAATAAAGATAGAGTCCCATTCTACATGTCAATATCAATACCGGCAACAATGAAATTTAGAGTAAGAGGAAAATCCGTCGACTTTAGAAATCGTGAGGGTTCAAGTCCCTCCTATCCCCA
>SC07
AGTCGCTGACTAGCTGCTATTGAGCCCCATCTACAAATGGATAATTCTGTCTTAGTGGAGACGAGTTTTTGAAAATAACGGAGAAATACCGACTCTCTTGCAAGAGAGTCGGTATTTCTCCGTTATTTTTTATGTTTTTCTTTAGTAGTTTTTTATTTCTATCCTTTTTTTACGAAAAGTATTTTTATGCTTTTGCTTTGATTTTGTCTGATATTTTTGTTATGGTTATGGGCTCATATTCGTTATGTACCAGTATAATAATATTAGTTATTTGTTAATCCCACTAATAAAGTTCTAATTTTATTAATTCGATTCTAATTTTCGAATTTTTTAGTTTTTTTAATAGAAAATAAAAGAAAAGAGAAAGTTGTAATTTTATGCCTCTTAGATCTTCATTTCTATTTTAAATGGTAGAAATTGAAACCTTTTTATTAAATATTTTATTAAATAGAAATAAAAAAAATTTTAAATCGTGGAGGAAGGGGGGGCGGATGTAGCCAAGTGGATCAAGGCAGTGGATTGTGAATCCACCATGCACGATGGATGGATGAGCTTGGTATGGAACTACTAAGTGATAACTTTCAAATTCAGAGAAACCCTGGAATCAAAAATGGGCAATCCTGAGCCAAATCCTGTTTTACAAGAACAAACAAGGGTTCAGAAAGCGAAAAAAAAAGAAGGGGATAGGTGCAGAGACTCAACGGAAGCTGTTCTAAGAAATGGGGTTGACTGCCTTTTTTGGTAAAGAAAGGAAAAGAAATCCTTCTATCGAATATCGAAACTCCATAAAGGATGAAGGATAAGCGTATATACACTATGTATACACAATGAAAAACTATCTCAAAAATGACAACCGAATCCGTATTTTTTTTATGAAAAAGAAAAGAATTGTTATGAATCAATTCCAAGTTGAAGAAAGAATCGAATATTCATTGATCAAATCATTCACTCCATAGTCTGATCGATCTTTTCTTTTGAAGAACTGATTAATCGGACAAGAATAAAGATAGAGTCCCATTCTACATGTCAATATCAATACCGGCAACAATGAAATTTAGAGTAAGAGGAAAATCCGTCGACTTTAGAAATCGTGAGGGTTCAAGTCCCTTCTATCCC
>SC08
ATTCCCCTGACTAGCTGCTATTGAGCCCCATCTACAAATGGATAATTCTGTCTTAGTGGAGACGAGTTTTTGAAAATAACGGAGAAATACCGACTCTCTTGCAAGAGAGTCGGTATTTCTCCGTTATTTTTTATGTTTTTCTTTAGTAGTTTTTTATTTCTATCCTTTTTTTACGAAAAGTATTTTTATGCTTTTGCTTTGATTTTGTCTGATATTTTTGTTATGGTTATGGGCTCATATTCGTTATGTACCAGTATAATAATATTAGTTATTTGTTAATCCCACTAATAAAGTTCTAATTTTATTAATTCGATTCTAATTTTCGAATTTTTTAGTTTTTTTAATAGAAAATAAAAGAAAAGAGAAAGTTGTAATTTTATGCCTCTTAGATCTTCATTTCTATTTTAAATGGTAGAAATTGAAACCTTTTTATTAAATATTTTATTAAATAGAAATAAAAAAAATTTTAAATCGTGGAGGAAGGGGGGGCGGATGTAGCCAAGTGGATCAAGGCAGTGGATTGTGAATCCACCATGACCGATATGGATGAGCTTGGTATGGACTACTAAGTGATAACTTTCAAATTCAGAGAAACCCTGGAATCAAAAATGGGCAATCCTGAGCCAAATCCTGTTTTACAAGAACAAACAAGGGTTCAGAAAGCGAAAAAAAAAGAAGGGGATAGGTGCAGAGACTCAACGGAAGCTGTTCTAAGAAATGGGGTTGACTGCCTTTTTTGGTAAAGAAAGGAAAAGAAATCCTTCTATCGAATATCGAAACTCCATAAAGGATGAAGGATAAGCGTATATACACTATGTATACACAATGAAAAACTATCTCAAAAATGACAACCGAATCCGTATTTTTTTTATGAAAAAGAAAAGAATTGTTATGAATCAATTCCAAGTTGAAGAAAGAATCGAATATTCATTGATCAAATCATTCACTCCATAGTCTGATCGATCTTTTCTTTTGAAGAACTGATTAATCGGACAAGAATAAAGATAGAGTCCCATTCTACATGTCAATATCAATACCGGCAACAATGAAATTTAGAGTAAGAGGAAAATCCGTCGACTTTAGAAATCGTGAGGGTTCAAGTCCTTCCTATTCCCCA
>SC09
AAATTCTTAGGACTAGCTGCTATTGAGCCCCATCTACAAATGGATAATTCTGTCTTAGTGGAGACGAGTTTTTGAAAATAACGGAGAAATACCGACTCTCTTGCAAGAGAGTCGGTATTTCTCCGTTATTTTTTATGTTTTTCTTTAGTAGTTTTTTATTTCTATCCTTTTTTTACGAAAAGTATTTTTATGCTTTTGCTTTGATTTTGTCTGATATTTTTGTTATGGTTATGGGCTCATATTCGTTATGTACCAGTATAATAATATTAGTTATTTGTTAATCCCACTAATAAAGTTCTAATTTTATTAATTCGATTCTAATTTTCGAATTTTTTAGTTTTTTTAATAGAAAATAAAAGAAAAGAGAAAGTTGTAATTTTATGCCTCTTAGATCTTCATTTCTATTTTAAATGGTAGAAATTGAAACCTTTTTATTAAATATTTTATTAAATAGAAATAAAAAAAATTTTAAATCGTGGAGGAAGGGGGGGCGGATGTAGCCAAGTGGATCAAGGCAGTGGATTGTGAATCCACCATGCGCGAGGGATGATGGCTTGGTATGGACTACTAAGTGATAACTTTCAAATTCAGAGAAACCCTGGAATCAAAAATGGGCAATCCTGAGCCAAATCCTGTTTTACAAGAACAAACAAGGGTTCAGAAAGCGAAAAAAAAAGAAGGGGATAGGTGCAGAGACTCAACGGAAGCTGTTCTAAGAAATGGGGTTGACTGCCTTTTTTGGTAAAGAAAGGAAAAGAAATCCTTCTATCGAATATCGAAACTCCATAAAGGATGAAGGATAAGCGTATATACACTATGTATACACAATGAAAAACTATCTCAAAAATGACAACCGAATCCGTATTTTTTTTATGAAAAAGAAAAGAATTGTTATGAATCAATTCCAAGTTGAAGAAAGAATCGAATATTCATTGATCAAATCATTCACTCCATAGTCTGATCGATCTTTTCTTTTGAAGAACTGATTAATCGGACAAGAATAAAGATAGAGTCCCATTCTACATGTCAATATCAATACCGGCAACAATGAAATTTAGAGTAAGAGGAAAATCCGTCGACTTTAGAAATCGTGAGGGTTCAAGTCCCTCCCTATCCCCCA
>SC10
ATCCGCTGACTAGCTGCTATTGAGCCCCATCTACAAATGGATAATTCTGTCTTAGTGGAGACGAGTTTTTGAAAATAACGGAGAAATACCGACTCTCTTGCAAGAGAGTCGGTATTTCTCCGTTATTTTTTATGTTTTTCTTTAGTAGTTTTTTATTTCTATCCTTTTTTTACGAAAAGTATTTTTATGCTTTTGCTTTGATTTTGTCTGATATTTTTGTTATGGTTATGAGCTCATATTCGTTATGTACCAGTATAATAATATTAGTTATTTGTTAATCCCACTAATAAAGTTCTAATTTTATTAATTCGATTCTAATTTTCGAATTTTTTAGTTTTTTTAATAGAAAATAAAAGAAAAGAGAAAGTTGTAATTTTATGCCTCTTAGATCTTCATTTCTATTTTAAATGGTAGAAATTGAAACCTTTTTATTAAATATTTTATTAAATAGAAATAAAAAAAATTTTAAATCGTGGAGGAAGGGGGGGCGGATGTAGCCAAGTGGATCAAGGCAGTGGATTGTGAATCCACCATGCACGAGGATGCATGGCTTGGTATGGAACTACTAAGTGATAACTTTCAAATTCAGAGAAACCCTGGAATCAAAAATGGGCAATCCTGAGCCAAATCCTGTTTTACAAGAACAAACAAGGGTTCAGAAAGCGAAAAAAAAAGAAGGGGATAGGTGCAGAGACTCAACGGAAGCTGTTCTAAGAAATGGGGTTGACTGCCTTTTTTGGTAAAGAAAGGAAAAGAAATCCTTCTATCGAATATCGAAACTCCATAAAGGATGAAGGATAAGCGTATATACACTATGTATACACAATGAAAAACTATCTCAAAAATGACAACCGAATCCGTATTTTTTTTATGAAAAAGAAAAGAATTGTTATGAATCAATTCCAAGTTGAAGAAAGAATCGAATATTCATTGATCAAATCATTCACTCCATAGTCTGATCGATCTTTTCTTTTGAAGAACTGATTAATCGGACAAGAATAAAGATAGAGTCCCATTCTACATGTCAATATCAATACCGGCAACAATGAAATTTAGAGTAAGAGGAAAATCCGTCGACTTTAGAAATCGTGAGGGTTCAAGTCCCTCCCTATCCCCA
>SC11
AATTCGTCTGACTAGCTGCTATTGAGCCCCATCTACAAATGGATAATTCTGTCTTAGTGGAGACGAGTTTTTGAAAATAACGGAGAAATACCGACTCTCTTGCAAGAGAGTCGGTATTTCTCCGTTATTTTTTATGTTTTTCTTTAGTAGTTTTTTATTTCTATCCTTTTTTTACGAAAAGTATTTTTATGCTTTTGCTTTGATTTTGTCTGATATTTTTGTTATGGTTATGGGCTCATATTCGTTATGTACCAGTATAATAATATTAGTTATTTGTTAATCCCACTAATAAAGTTCTAATTTTATTAATTCGATTCTAATTTTCGAATTTTTTAGTTTTTTTAATAGAAAATAAAAGAAAAGAGAAAGTTGTAATTTTATGCCTCTTAGATCTTCATTTCTATTTTAAATGGTAGAAATTGAAACCTTTTTATTAAATATTTTATTAAATAGAAATAAAAAAAATTTTAAATCGTGGAGGAAGGGGGGGCGGATGTAGCCAAGTGGATCAAGGCAGTGGATTGGGAATCCACCATGCGCGAGGGATGGATGGCTTGGTATGGAACTACTAAGTGATAACTTTCAAATTCAGAGAAACCCTGGAATCAAAAATGGGCAATCCTGAGCCAAATCCTGTTTTACAAGAACAAACAAGGGTTCAGAAAGCGAAAAAAAAAGAAGGGGATAGGTGCAGAGACTCAACGGAAGCTGTTCTAAGAAATGGGGTTGACTGCCTTTTTTGGTAAAGAAAGGAAAAGAAATCCTTCTATCGAATATCGAAACTCCATAAAGGATGAAGGATAAGCGTATATACACTATGTATACACAATGAAAAACTATCTCAAAAATGACAACCGAATCCGTATTTTTTTTATGAAAAAGAAAAGAATTGTTATGAATCAATTCCAAGTTGAAGAAAGAATCGAATATTCATTGATCAAATCATTCACTCCATAGTCTGATCGATCTTTTCTTTTGAAGAACTGATTAATCGGACAAGAATAAAGATAGAGTCCCATTCTACATGTCAATATCAATACCGGCAACAATGAAATTTAGAGTAAGAGGAAAATCCGTCGACTTTAGAAATCGTGAGGGTTCAAGTCCCTCCTATCCCCC
>SC12
ATTCCTCTGACTAGCTGCTATTGAGCCCCATCTACAAATGGATAATTCTGTCTTAGTGGAGACGAGTTTTTGAAAATAACGGAGAAATACCGACTCTCTTGCAAGAGAGTCGGTATTTCTCCGTTATTTTTTATGTTTTTCTTTAGTAGTTTTTTATTTCTATCCTTTTTTTACGAAAAGTATTTTTATGCTTTTGCTTTGATTTTGTCTGATATTTTTGTTATGGTTATGGGCTCATATTCGTTATGTACCAGTATAATAATATTAGTTATTTGTTAATCCCACTAATAAAGTTCTAATTTTATTAATTCGATTCTAATTTTCGAATTTTTTAGTTTTTTTAATAGAAAATAAAAGAAAAGAGAAAGTTGTAATTTTATGCCTCTTAGATCTTCATTTCTATTTTAAATGGTAGAAATTGAAACCTTTTTATTAAATATTTTATTAAATAGAAATAAAAAAAATTTTAAATCGTGGAGGAAGGGGGGGCGGATGTAGCCAAGTGGATCAAGGCAGTGGATTGTGAATCCACCATGACGCGAGGATGGATGAGCTTGGTATGGAACTACTAAGTGATAACTTTCAAATTCAGAGAAACCCTGGAATCAAAAATGGGCAATCCTGAGCCAAATCCTGTTTTACAAGAACAAACAAGGGTTCAGAAAGCGAAAAAAAAAGAAGGGGATAGGTGCAGAGACTCAACGGAAGCTGTTCTAAGAAATGGGGTTGACTGCCTTTTTTGGTAAAGAAAGGAAAAGAAATCCTTCTATCGAATATCGAAACTCCATAAAGGATGAAGGATAAGCGTATATACACTATGTATACACAATGAAAAACTATCTCAAAAATGACAACCGAATCCGTATTTTTTTTATGAAAAAGAAAAGAATTGTTATGAATCAATTCCAAGTTGAAGAAAGAATCGAATATTCATTGATCAAATCATTCACTCCATAGTCTGATCGATCTTTTCTTTTGAAGAACTGATTAATCGGACAAGAATAAAGATAGAGTCCCATTCTACATGTCAATATCAATACCGGCAACAATGAAATTTAGAGTAAGAGGAAAATCCGTCGACTTTAGAAATCGTGAGGGTTCAAGTCCCTCCCTATCCCCA
>CB01
CATCTTTGACTGCTGCTATTGAGCCCCATCTACAAATGGATAATTCTGTCTTAGTGGAGACGAGTTTTTGAAAATAACGGAGAAATACCGACTCTCTTGCAAGAGAGTCGGTATTTCTCAGTTATTTTTTATGTTTTTCTTTAGTAGTTTTTTATTTCTATCCTTTTTTTACGAAAAGTATTTTTATGCTTTTGCTTTGATTTTGTCTGATATTTTTGTTATGGTTATGGGCTCATATTCGTTATGTACCAGTATAATAATATTAGTTATTTGTTAATCCCACTAATAAAGTTCTAATTTTATTAATTCGATTCTAATTTTCGAATTTTTTAGTTTTTTTAATAGAAAATAAAAGAAAAGAGAAAGTTGTAATTTTATGCCTCTTAGATCTTCATTTCTATTTTAAATGGTAGAAATTGAAACCTTTTTATTAAATATTTTATTAAATAGAAATAAAAAAATTTTTAAATCGTGGAGGAAGGGGGGGCGGATGTAGCCAAGTGGATCAAGGCAGTGGATTGTGAATCCACCATGCGCGACGAGGTGGGGTATGGCACTACTAAGTGATAACTTTCAAATTCAGAGAAACCCTGGAATCAAAAATGGGCAATCCTGAGCCAAATCCTGTTTTACAAGAACAAACAAGGGTTCAGAAAGCGAAAAAAAAAGAAGGGGATAGGTGCAGAGACTCAACGGAAGCTGTTCTAAGAAATGGGGTTGACTGCCTTTTTTGGTAAAGAAAGGAAAAGAAATCCTTCTATCGAATATCGAAACTCCATAAAGGATGAAGGATAAGCGTATATACACTATGTATACACAATGAAAAACTATCTCAAAAATGACAACCGAATCCGTATTTTTTTTATGAAAAAGAAAAGAATTGTTATGAATCAATTCCAAGTTGAAGAAAGAATCGAATATTCATTGATCAAATCATTCACTCCATAGTCTGATCGATCTTTTCTTTTGAAGAACTGATTAATCGGACAAGAATAAAGATAGAGTCCCATTCTACATGTCAATATCAATACCGGCAACAATGAAATTTAGAGTAAGAGGAAAATCCGTCGACTTTAGAAATCGTGAGGGTTCAAGTCCTTCTTATTCCCCA
>CB02
AATCGCTGACTGCTGCTATTGAGCCCCATCTACAAATGGATAATTCTGTCTTAGTGGAGACGAGTTTTTGAAAATAACGGAGAAATACCGACTCTCTTGCAAGAGAGTCGGTATTTCTCCGTTATTTTTTATGTTTTTCTTTAGTAGTTTTTTATTTCTATCCTTTTTTTGGGGCAGTATTTTTATGCTTTTGCTTTGATTTTGTCTGATATTTTTGTTATGGTTATGGGCTCATATTCGTTATGTACCAGTATAATAATATTAGTTATTTGTTAATCCCACTAATAAAGTTCTAATTTTATTAATTCGATTCTAATTTTCGAATTTTTTAGTTTTTTTAATAGAAAATAAAAGAAAAGAGAAAGTTGTAATTTTATGCCTCTTAGATCTTCATTTCTATTTTAAATGGTAGAAATTGAAACCTTTTTATTAAATATTTTATTAAATAGAAATAAAAAAATTTTTAAATCGTGGAGGAAGGGGGGGCGGATGTAGCCAAGTGGATCATGGCAGTGGATTGTGAATCCACCAAACGCGACGAGTTGTGGATGGCTTGGTATGGAACTACTAAGTGATAACTTTCAAATTCAGAGAAACCCTGGAATCAAAAATGGGCAATCCTGAGCCAAATCCTGTTTTACAAGAACAAACAAGGGTTCAGAAAGCGAAAAAAAAAGAAGGGGATAGGTGCAGAGACTCAACGGAAGCTGTTCTAAGAAATGGGGTTGACTGCCTTTTTTGGTAAAGAAAGGAAAAGAAATCCTTCTATCGAATATCGAAACTCCATAAAGGATGAAGGATAAGCGTATATACACTATGTATACACAATGAAAAACTATCTCAAAAATGACAACCGAATCCGTATTTTTTTTATGAAAAAGAAAAGAATTGTTATGAATCAATTCCAAGTTGAAGAAAGAATCGAATATTCATTGATCAAATCATTCACTCCATAGTCTGATCGATCTTTTCTTTTGAAGAACTGATTAATCGGACAAGAATAAAGATAGAGTCCCATTCTACATGTCAATATCAATACCGGCAACAATGAAATTTAGAGTAAGAGGAAAATCCGTCGACTTTAGAAATCGTGAGGGTTCAAGTCCCTCCCTATCCCCCA
>CB03
ATCACTGACTAGCTGCTATTGAGCCCCATCTACAAATGGATAATTCTGTCTTAGTGGAGACGAGTTTTTGAAAATAACGGAGAAATACCGACTCTCTTGCAAGAGAGTCGGTATTTCTCCGTTATTTTTTATGTTTTTCTTTAGTAGTTTTTTATTTCTATCCTTTTTTTGGGGCAGTATTTTTATGCTTTTGCTTTGATTTTGTCTGATATTTTTGTTATGGTTATGGGCTCATATTCGTTATGTACCAGTATAATAATATTAGTTATTTGTTAATCCCACTAATAAAGTTCTAATTTTATTAATTCGATTCTAATTTTCGAATTTTTTAGTTTTTTTAATAGAAAATAAAAGAAAAGAGAAAGTTGTAATTTTATGCCTCTTAGATCTTCATTTCTATTTTAAATGGTAGAAATTGAAACCTTTTTATTAAATATTTTATTAAATAGAAATAAAAAAATTTTTAAATCGTGGAGGAAGGGGGGGCGGATGTAGCCAAGTGGATCAAGGCAGTGGATTGTGAATCCACCATGCGCGACGAGTTGGGAATGCATGAGCTTGGTATGGAACTACTAAGTGATAACTTTCAAATTCAGAGAAACCCTGGAATCAAAAATGGGCAATCCTGAGCCAAATCCTGTTTTACAAGAACAAACAAGGGTTCAGAAAGCGAAAAAAAAAGAAGGGGATAGGTGCAGAGACTCAACGGAAGCTGTTCTAAGAAATGGGGTTGACTGCCTTTTTTGGTAAAGAAAGGAAAAGAAATCCTTCTATCGAATATCGAAACTCCATAAAGGATGAAGGATAAGCGTATATACACTATGTATACACAATGAAAAACTATCTCAAAAATGACAACCGAATCCGTATTTTTTTTATGAAAAAGAAAAGAATTGTTATGAATCAATTCCAAGTTGAAGAAAGAATCGAATATTCATTGATCAAATCATTCACTCCATAGTCTGATCGATCTTTTCTTTTGAAGAACTGATTAATCGGACAAGAATAAAGATAGAGTCCCATTCTACATGTCAATATCAATACCGGCAACAATGAAATTTAGAGTAAGAGGAAAATCCGTCGACTTTAGAAATCGTGAGGGTTCAAGTCCCTCCTATCCCCCA
>CB04
AATCACTGACTAGCTGCTATTGAGCCCCATCTACAAATGGATAATTCTGTCTTAGTGGAGACGAGTTTTTGAAAATAACGGAGAAATACCGACTCTCTTGCAAGAGAGTCGGTATTTCTCCGTTATTTTTTATGTTTTTCTTTAGTAGTTTTTTATTTCTATCCTTTTTTTGGGGCTGTATTTTTATGCTTTTGCTTTGATTTTGTCTGATATTTTTGTTATGGTTATGGGCTCATATTCGTTATGTACCAGTATAATAATATTAGTTATTTGTTAATCCCACTAATAAAGTTCTAATTTTATTAATTCGATTCTAATTTTCGAATTTTTTAGTTTTTTTAATAGAAAATAAAAGAAAAGAGAAAGTTGTAATTTTATGCCTCTTAGATCTTCATTTCTATTTTAAATGGTAGAAATTGAAACCTTTTTATTAAATATTTTATTAAATAGAAATAAAAAAATTTTTAAATCGTGGAGGAAGGGGGGGCGGATGTAGCCAAGTGGATCAAGGCAGTGGATTGTGAATCCACCAAGCGCGACGAATTCCGCATGGCTTGGTATGGAACTACTAAGTGATAACTTTCAAATTCAGAGAAACCCTGGAATCAAAAATGGGCAATCCTGAGCCAAATCCTGTTTTACAAGAACAAACAAGGGTTCAGAAAGCGAAAAAAAAAGAAGGGGATAGGTGCAGAGACTCAACGGAAGCTGTTCTAAGAAATGGGGTTGACTGCCTTTTTTGGTAAAGAAAGGAAAAGAAATCCTTCTATCGAATATCGAAACTCCATAAAGGATGAAGGATAAGCGTATATACACTATGTATACACAATGAAAAACTATCTCAAAAATGACAACCGAATCCGTATTTTTTTTATGAAAAAGAAAAGAATTGTTATGAATCAATTCCAAGTTGAAGAAAGAATCGAATATTCATTGATCAAATCATTCACTCCATAGTCTGATCGATCTTTTCTTTTGAAGAACTGATTAATCGGACAAGAATAAAGATAGAGTCCCATTCTACATGTCAATATCAATACCGGCAACAATGAAATTTAGAGTAAGAGGAAAATCCGTCGACTTTAGAAATCGTGAGGGTTCAAGTCCTTTCTATTCCCCCA
>CB05
ATCACTGACTAGCTGCTATTGAGCCCCATCTACAAATGGATAATTCTGTCTTAGTGGAGACGAGTTTTTGAAAATAACGGAGAAATACCGACTCTCTTGCAAGAGAGTCGGTATTTCTCCGTTATTTTTTATGTTTTTCTTTAGTAGTTTTTTATTTCTATCCTTTTTTTGGGGCAGTATTTTTATGCTTTTGCTTTGATTTTGTCTGATATTTTTGTTATGGTTATGGGCTCATATTCGTTATGTACCAGTATAATAATATTAGTTATTTGTTAATCCCACTAATAAAGTTCTAATTTTATTAATTCGATTCTAATTTTCGAATTTTTTAGTTTTTTTAATAGAAAATAAAAGAAAAGAGAAAGTTGTAATTTTATGCCTCTTAGATCTTCATTTCTATTTTAAATGGTAGAAATTGAAACCTTTTTATTAAATATTTTATTAAATAGAAATAAAAAAATTTTTAAATCGTGGAGGAAGGGGGGGCGGATGTAGCCAAGTGGATCAAGGCAGTGGATTGTGAATCCACCATGCGCGACGAGCGCGGGATGGCATGAGCTTGGTATGGAACTACTAAGTGATAACTTTCAAATTCAGAGAAACCCTGGAATCAAAAATGGGCAATCCTGAGCCAAATCCTGTTTTACAAGAACAAACAAGGGTTCAGAAAGCGAAAAAAAAAGAAGGGGATAGGTGCAGAGACTCAACGGAAGCTGTTCTAAGAAATGGGGTTGACTGCCTTTTTTGGTAAAGAAAGGAAAAGAAATCCTTCTATCGAATATCGAAACTCCATAAAGGATGAAGGATAAGCGTATATACACTATGTATACACAATGAAAAACTATCTCAAAAATGACAACCGAATCCGTATTTTTTTTATGAAAAAGAAAAGAATTGTTATGAATCAATTCCAAGTTGAAGAAAGAATCGAATATTCATTGATCAAATCATTCACTCCATAGTCTGATCGATCTTTTCTTTTGAAGAACTGATTAATCGGACAAGAATAAAGATAGAGTCCCATTCTACATGTCAATATCAATACCGGCAACAATGAAATTTAGAGTAAGAGGAAAATCCGTCGACTTTAGAAATCGTGAGGGTTCAAGTCCTTCCTATTCCCCA
>CB06
CGTCTCTGACTAGCTGCTATTGAGCCCCATCTACAAATAGGATAATTCTGTCTTAGTGGAGACGAGTTTTTGAAAATAACGGAGAAATACCGACTCTCTTGCAAGAGAGTCGGTATTTCTCCGTTATTTTTTATGTTTTTCTTTAGTAGTTTTTTATTTCTATCCTTTTTTTGGGGCTGTATTTTTATGCTTTTGCTTTGATTTTGTCTGATATTTTTGTTATGGTTATGGGCTCATATTCGTTATGTACCAGTATAATAATATTAGTTATTTGTTAATCCCACTAATAAAGTTCTAATTTTATTAATTCGATTCTAATTTTCGAATTTTTTAGTTTTTTTAATAGAAAATAAAAGAAAAGAGAAAGTTGTAATTTTATGCCTCTTAGATCTTCATTTCTATTTTAAATGGTAGAAATTGAAACCTTTTTATTAAATATTTTATTAAATAGAAATAAAAAAATTTTTAAATCGTGGAGGAAGGGGGGGCGGATGTAGCCAAGTGGATCAAGGCAGTGGATTGTGAATCCACCATGCGCGACGAGTGCGGATGCATGAGCTTGGTATGGACTACTAAGTGATAACTTTCAAATTCAGAGAAACCCTGGAATCAAAAATGGGCAATCCTGAGCCAAATCCTGTTTTACAAGAACAAACAAGGGTTCAGAAAGCGAAAAAAAAAGAAGGGGATAGGTGCAGAGACTCAACGGAAGCTGTTCTAAGAAATGGGGTTGACTGCCTTTTTTGGTAAAGAAAGGAAAAGAAATCCTTCTATCGAATATCGAAACTCCATAAAGGATGAAGGATAAGCGTATATACACTATGTATACACAATGAAAAACTATCTCAAAAATGACAACCGAATCCGTATTTTTTTTATGAAAAAGAAAAGAATTGTTATGAATCAATTCCAAGTTGAAGAAAGAATCGAATATTCATTGATCAAATCATTCACTCCATAGTCTGATCGATCTTTTCTTTTGAAGAACTGATTAATCGGACAAGAATAAAGATAGAGTCCCATTCTACATGTCAATATCAATACCGGCAACAATGAAATTTAGAGTAAGAGGAAAATCCGTCGACTTTAGAAATCGTGAGGGTTCAAGTCCTTCCTATCCCCCCA
>CB07
GAATCATTGACTGCTGCTATTGAGCCCCATCTACAAATGGATAATTCTGTCTTAGTGGAGACGAGTTTTTGAAAATAACGGAGAAATACCGACTCTCTTGCAAGAGAGTCGGTATTTCTCCGTTATTTTTTATGTTTTTCTTTAGTAGTTTTTTATTTCTATCCTTTTTTTGGGGCTGTATTTTTATGCTTTTGCTTTGGAAGTGTCTGATATTTTTGTTATGGTTATGGGCTCATATTCGTTATGTACCAGTATAATAATATTAGTTATTTGTTAATCCCACTAATAAAGTTCTAATTTTATTAATTCGATTCTAATTTTCGAATTTTTTAGTTTTTTTAATAGAAAATAAAAGAAAAGAGAAAGTTGTAATTTTATGCCTCTTAGATCTTCATTTCTATTTTAAATGGTAGAAATTGAAACCTTTTTATTAAATATTTTATTAAATAGAAATAAAAAAATTTTTAAATCGTGGAGGAAGGGGGGGCGGATGTAGCCAAGTGGATCAAGGCAGTGGATTGTGAATCCACCATGCGCGATAAGGGATGGCATGGGCTTGGTATGGACTACTAAGTGATAACTTTCAAATTCAGAGAAACCCTGGAATCAAAAATGGGCAATCCTGAGCCAAATCCTGTTTTACAAGAACAAACAAGGGTTCAGAAAGCGAAAAAAAAAGAAGGGGATAGGTGCAGAGACTCAACGGAAGCTGTTCTAAGAAATGGGGTTGACTGCCTTTTTTGGTAAAGAAAGGAAAAGAAATCCTTCTATCGAATATCGAAACTCCATAAAGGATGAAGGATAAGCGTATATACACTATGTATACACAATGAAAAACTATCTCAAAAATGACAACCGAATCCGTATTTTTTTTATGAAAAAGAAAAGAATTGTTATGAATCAATTCCAAGTTGAAGAAAGAATCGAATATTCATTGATCAAATCATTCACTCCATAGTCTGATCGATCTTTTCTTTTGAAGAACTGATTAATCGGACAAGAATAAAGATAGAGTCCCATTCTACATGTCAATATCAATACCGGCAACAATGAAATTTAGAGTAAGAGGAAAATCCGTCGACTTTAGAAATCGTGAGGGTTCAAGTCCCTCCCTATCCCCCA
>CB08
AATTCACTGACTAGCTGCTATTGAGCCCCATCTACAAATGGATAATTCTGTCTTAGTGGAGACGAGTTTTTGAAAATAACGGAGAAATACCGACTCTCTTGCAAGAGAGTCGGTATTTCTCCGTTATTTTTTATGTTTTTCTTTAGTAGTTTTTTATTTCTATCCTTTTTTTGGGGCAGTATTTTTATGCTTTTGCTTTGATTTTGTCTGATATTTTTGTTATGGTTATGGGCTCATATTCGTTATGTACCAGTATAATAATATTAGTTATTTGTTAATCCCACTAATAAAGTTCTAATTTTATTAATTCGATTCTAATTTTCGAATTTTTTAGTTTTTTTAATAGAAAATAAAAGAAAAGAGAAAGTTGTAATTTTATGCCTCTTAGATCTTCATTTCTATTTTAAATGGTAGAAATTGAAACCTTTTTATTAAATATTTTATTAAATAGAAATAAAAAAATTTTTAAATCGTGGAGGAAGGGGGGGCGGATGTAGCCAAGTGGATCAAGGCAGTGGATTGTGAATCCACCATGCGCGACGAACCTTGGGATGGCTTGGTATGGACTACTAAGTGATAACTTTCAAATTCAGAGAAACCCTGGAATCAAAAATGGGCAATCCTGAGCCAAATCCTGTTTTACAAGAACAAACAAGGGTTCAGAAAGCGAAAAAAAAAGAAGGGGATAGGTGCAGAGACTCAACGGAAGCTGTTCTAAGAAATGGGGTTGACTGCCTTTTTTGGTAAAGAAAGGAAAAGAAATCCTTCTATCGAATATCGAAACTCCATAAAGGATGAAGGATAAGCGTATATACACTATGTATACACAATGAAAAACTATCTCAAAAATGACAACCGAATCCGTATTTTTTTTATGAAAAAGAAAAGAATTGTTATGAATCAATTCCAAGTTGAAGAAAGAATCGAATATTCATTGATCAAATCATTCACTCCATAGTCTGATCGATCTTTTCTTTTGAAGAACTGATTAATCGGACAAGAATAAAGATAGAGTCCCATTCTACATGTCAATATCAATACCGGCAACAATGAAATTTAGAGTAAGAGGAAAATCCGTCGACTTTAGAAATCGTGAGGGTTCAAGTCCCTCTTATTCCCCA
>CB09
AATCACTGACTAGCTGCTATTGAGCCCCATCTACAAATGGATAATTCTGTCTTAGTGGAGACGAGTTTTTGAAAATAACGGAGAAATACCGACTCTCTTGCAAGAGAGTCGGTATTTCTCCGTTATTTTTTATGTTTTTCTTTAGTAGTTTTTTATTTCTATCCTTTTTTTGGGGCTGTATTTTTATGCTTTTGCTTTGATTTTGTCTGATATTTTTGTTATGGTTATGGGCTCATATTCGTTATGTACCAGTATAATAATATTAGTTATTTGTTAATCCCACTAATAAAGTTCTAATTTTATTAATTCGATTCTAATTTTCGAATTTTTTAGTTTTTTTAATAGAAAATAAAAGAAAAGAGAAAGTTGTAATTTTATGCCTCTTAGATCTTCATTTCTATTTTAAATGGTAGAAATTGAAACCTTTTTATTAAATATTTTATTAAATAGAAATAAAAAAATTTTTAAATCGTGGAGGAAGGGGGGGCGGATGTAGCCAAGTGGATCAAGGCAGTGGATTGTGAATCCACCATGACCGAGGACGGATGGCATGAGCTTGGTATGGACTACTAAGTGATAACTTTCAAATTCAGAGAAACCCTGGAATCAAAAATGGGCAATCCTGAGCCAAATCCTGTTTTACAAGAACAAACAAGGGTTCAGAAAGCGAAAAAAAAAGAAGGGGATAGGTGCAGAGACTCAACGGAAGCTGTTCTAAGAAATGGGGTTGACTGCCTTTTTTGGTAAAGAAAGGAAAAGAAATCCTTCTATCGAATATCGAAACTCCATAAAGGATGAAGGATAAGCGTATATACACTATGTATACACAATGAAAAACTATCTCAAAAATGACAACCGAATCCGTATTTTTTTTATGAAAAAGAAAAGAATTGTTATGAATCAATTCCAAGTTGAAGAAAGAATCGAATATTCATTGATCAAATCATTCACTCCATAGTCTGATCGATCTTTTCTTTTGAAGAACTGATTAATCGGACAAGAATAAAGATAGAGTCCCATTCTACATGTCAATATCAATACCGGCAACAATGAAATTTAGAGTAAGAGGAAAATCCGTCGACTTTAGAAATCGTGAGGGTTCAAGTCCCTCCCTATCCCCCA
>CB10
TATTCACTGACTGCTGCTATTGAGCCCCATCTACAAATGGATAATTCTGTCTTAGTGGAGACGAGTTTTTGAAAATAACGGAGAAATACCGACTCTCTTGCAAGAGAGTCGGTATTTCTCCGTTATTTTTTATGTTTTTCTTTAGTAGTTTTTTATTTCTATCCTTTTTTTACGAAAAGTATTTTTATGCTTTTGCTTTGATTTTGTCTGATATTTTTGTTATGGTTATGGGCTCATATTCGTTATGTACCAGTATAATAATATTAGTTATTTGTTAATCCCACTAATAAAGTTCTAATTTTATTAATTCGATTCTAATTTTCGAATTTTTTAGTTTTTTTAATAGAAAATAAAAGAAAAGAGAAAGTTGTAATTTTATGCCTCTTAGATCTTCATTTCTATTTTAAATGGTAGAAATTGAAACCTTTTTATTAAATATTTTATTAAATAGAAATAAAAAAATTTTTAAATCGTGGAGGAAGGGGGGGCGGATGTAGCCAAGTGGATCAAGGCAGTGGATTGTGAATCCACCATGCGCGAGGATTGGCTGGCTTGGTATGGACTACTAAGTGATAACTTTCAAATTCAGAGAAACCCTGGAATCAAAAATGGGCAATCCTGAGCCAAATCCTGTTTTACAAGAACAAACAAGGGTTCAGAAAGCGAAAAAAAAAGAAGGGGATAGGTGCAGAGACTCAACGGAAGCTGTTCTAAGAAATGGGGTTGACTGCCTTTTTTGGTAAAGAAAGGAAAAGAAATCCTTCTATCGAATATCGAAACTCCATAAAGGATGAAGGATAAGCGTATATACACTATGTATACACAATGAAAAACTATCTCAAAAATGACAACCGAATCCGTATTTTTTTTATGAAAAAGAAAAGAATTGTTATGAATCAATTCCAAGTTGAAGAAAGAATCGAATATTCATTGATCAAATCATTCACTCCATAGTCTGATCGATCTTTTCTTTTGAAGAACTGATTAATCGGACAAGAATAAAGATAGAGTCCCATTCTACATGTCAATATCAATACCGGCAACAATGAAATTTAGAGTAAGAGGAAAATCCGTCGACTTTAGAAATCGTGAGGGTTCAAGTCCCTCCTATCCCA
>CB11
AATTCTTGACTAGCTGCTATTGAGCCCCATCTACAAATGGATAATTCTGTCTTAGTGGAGACGAGTTTTTGAAAATAACGGAGAAATACCGACTCTCTTGCAAGAGAGTCGGTATTTCTCCGTTATTTTTTATGTTTTTCTTTAGTAGTTTTTTATTTCTATCCTTTTTTTACGAAAAGTATTTTTATGCTTTTGCTTTGATTTTGTCTGATATTTTTGTTATGGTTATGGGCTCATATTCGTTATGTACCAGTATAATAATATTAGTTATTTGTTAATCCCACTAATAAAGTTCTAATTTTATTAATTCGATTCTAATTTTCGAATTTTTTAGTTTTTTTAATAGAAAATAAAAGAAAAGAGAAAGTTGTAATTTTATGCCTCTTAGATCTTCATTTCTATTTTAAATGGTAGAAATTGAAACCTTTTTATTAAATATTTTATTAAATAGAAATAAAAAAATTTTTAAATCGTGGAGGAAGGGGGGGCGGATGTAGCCAAGTGGATCAAGGCAGTGGATTGTGAATCCACCAAGCGCGACGAGTTCGGGATGCATGAGCTTGGTATGGAACTACTAAGTGATAACTTTCAAATTCAGAGAAACCCTGGAATCAAAAATGGGCAATCCTGAGCCAAATCCTGTTTTACAAGAACAAACAAGGGTTCAGAAAGCGAAAAAAAAAGAAGGGGATAGGTGCAGAGACTCAACGGAAGCTGTTCTAAGAAATGGGGTTGACTGCCTTTTTTGGTAAAGAAAGGAAAAGAAATCCTTCTATCGAATATCGAAACTCCATAAAGGATGAAGGATAAGCGTATATACACTATGTATACACAATGAAAAACTATCTCAAAAATGACAACCGAATCCGTATTTTTTTTATGAAAAAGAAAAGAATTGTTATGAATCAATTCCAAGTTGAAGAAAGAATCGAATATTCATTGATCAAATCATTCACTCCATAGTCTGATCGATCTTTTCTTTTGAAGAACTGATTAATCGGACAAGAATAAAGATAGAGTCCCATTCTACATGTCAATATCAATACCGGCAACAATGAAATTTAGAGTAAGAGGAAAATCCGTCGACTTTAGAAATCGTGAGGGTTCAAGTCCCTCCTAATCCCCCC
>CB12
ATTCTCTGACTAGCTGCTATTGAGCCCCATCTACAAATGGATAATTCTGTCTTAGTGGAGACGAGTTTTTGAAAATAACGGAGAAATACCGACTCTCTTGCAAGAGAGTCGGTATTTCTCCGTTATTTTTTATGTTTTTCTTTAGTAGTTTTTTATTTCTATCCTTTTTTTACGAAAAGTATTTTTATGCTTTTGCTTTGATTTTGTCTGATATTTTTGTTATGGTTATGGGCTCATATTCGTTATGTACCAGTATAATAATATTAGTTATTTGTTAATCCCACTAATAAAGTTCTAATTTTATTAATTCGATTCTAATTTTCGAATTTTTTAGTTTTTTTAATAGAAAATAAAAGAAAAGAGAAAGTTGTAATTTTATGCCTCTTAGATCTTCATTTCTATTTTAAATGGTAGAAATTGAAACCCTTTTATTAAATATTTTATTAAATAGAAATAAAAAAAATTTTAAATCGTGGAGGAAGGGGGGGCGGATGTAGCCAAGTGGATCAAGGCAGTGGATTGTGAATCCACCATGCGCGACTAGGATGGATGAGCTTGGTATGGAACTACTAAGTGATAACTTTCAAATTCAGAGAAACCCTGGAATCAAAAATGGGTAATCCTGAGCCAAATCCTGTTTTACAAGAACAAACAAGGGTTCAGAAAGCGAAAAAAAAAGAAGGGGATAGGTGCAGAGACTCAACGGAAGCTGTTCTAAGAAATGGGGTTGACTGCCTTTTTTGGTAAAGAAAGGAAAAGAAATCCTTCTATCGAATATCGAAACTCCATAAAGGATGAAGGATAAGCGTATATACACTATGTATACACAATGAAAAACTATCTCAAAAATGACAACCGAATCCGTATTTTTTTTATGAAAAAGAAAAGAATTGTTATGAATCAATTCCAAGTTGAAGAAAGAATCGAATATTCATTGATCAAATCATTCACTCCATAGTCTGATCGATCTTTTCTTTTGAAGAACTGATTAATCGGACAAGAATAAAGATAGAGTCCCATTCTACATGTCAATATCAATACCGGCAACAATGAAATTTAGAGTAAGAGGAAAATCCGTCGACTTTAGAAATCGTGAGGGTTCAAGTCCCTTCCTATCCCCCA
>CB13
AGTCATTGACTGCTGCTATTGAGCCCCATCTACAAATGGATAATTCTGTCTTAGTGGAGACGAGTTTTTGAAAATAACGGAGAAATACCGACTCTCTTGCAAGAGAGTCGGTATTTCTCAGTTATTTTTTATGTTTTTCTTTAGTAGTTTTTTATTTCTATCCTTTTTTTACGAAAAGTATTTTTATGCTTTTGCTTTGATTTTGTCTGATATTTTTGTTATGGTTATGGGCTCATATTCGTTATGTACCAGTATAATAATATTAGTTATTTGTTAATCCCACTAATAAAGTTCTAATTTTATTAATTCGATTCTAATTTTCGAATTTTTTAGTTTTTTTAATAGAAAATAAAAGAAAAGAGAAAGTTGTAATTTTATGCCTCTTAGATCTTCATTTCTATTTTAAATGGTAGAAATTGAAACCTTTTTATTAAATATTTTATTAAATAGAAATAAAAAAATTTTTAAATCGTGGAGGAAGGGGGGGCGGATGTAGCCAAGTGGATCATGGCAGTGGATTGTGAATCCACCATGCGCGACGAGTGGGGGGTGGGGGCGGATGTAGCCAAGTGGATCAAGGCAGTGGATTGTGAATCCACCATGCGCGAGTGGGGATGCATGGCTTGGTATGGAACTACTAAGTGATAACTTTCAAATTCAGAGAAACCCTGGAATCAAAAATGGGCAATCCTGAGCCAAATCCTGTTTTACAAGAACAAACAAGGGTTCAGAAAGCGAAAAAAAAAGAAGGGGATAGGTGCAGAGACTCAACGGAAGCTGTTCTAAGAAATGGGGTTGACTGCCTTTTTTGGTAAAGAAAGGAAAAGAAATCCTTCTATCGAATATCGAAACTCCATAAAGGATGAAGGATAAGCGTATATACACTATGTATACACAATGAAAAACTATCTCAAAAATGACAACCGAATCCGTATTTTTTTTATGAAAAAGAAAAGAATTGTTATGAATCAATTCCAAGTTGAAGAAAGAATCGAATATTCATTGATCAAATCATTCACTCCATAGTCTGATCGATCTTTTCTTTTGAAGAACTGATTAATCGGACAAGAATAAAGATAGAGTCCCATTCTACATGTCAATATCAATACCGGCAACAATGAAATTTAGAGTAAGAGGAAAATCCGTCGACTTTAGAAATCGTGAGGGTTCAAGTCTTTCTTTTCCCCCA
>CB14
AGCGCTGACTAGCTGCTATTGAGCCCCATCTACAAATGGATAATTCTGTCTTAGTGGAGACGAGTTTTTGAAAATAACGGAGAAATACCGACTCTCTTGCAAGAGAGTCGGTATTTCTCCGTTATTTTTTATGTTTTTCTTTAGTAGTTTTTTATTTCTATCCTTTTTTTGGGGCAGTATTTTTATGCTTTTGCTTTGATTTTGTCTGATATTTTTGTTATGGTTATGGGCTCATATTCGTTATGTACCAGTATAATAATATTAGTTATTTGTTAATCCCACTAATAAAGTTCTAATTTTATTAATTCGATTCTAATTTTCGAATTTTTTAGTTTTTTTAATAGAAAATAAAAGAAAAGAGAAAGTTGTAATTTTATGCCTCTTAGATCTTCATTTCTATTTTAAATGGTAGAAATTGAAACCCTTTTATTAAATATTTTATTAAATAGAAATAAAAAAAATTTTAAATCGTGGAGGAAGGGGGGGCGGATGTAGCCAAGTGGATCAAGGCAGTGGATTGTGAATCCACCATGCGCGAGGAGTGGGGGGTGGGGGCGGATGTAGCCAAGTGGATCAAGGCAGTGGATTGTGAATCCACCATGCGCGAGTGGATGCATGAGCTTGGTATGGAACTACTAAGTGATAACTTTCAAATTCAGAGAAACCCTGGAATCAAAAATGGGTAATCCTGAGCCAAATCCTGTTTTACAAGAACAAACAAGGGTTCAGAAAGCGAAAAAAAAAGAAGGGGATAGGTGCAGAGACTCAACGGAAGCTGTTCTAAGAAATGGGGTTGACTGCCTTTTTTGGTAAAGAAAGGAAAAGAAATCCTTCTATCGAATATCGAAACTCCATAAAGGATGAAGGATAAGCGTATATACACTATGTATACACAATGAAAAACTATCTCAAAAATGACAACCGAATCCGTATTTTTTTTATGAAAAAGAAAAGAATTGTTATGAATCAATTCCAAGTTGAAGAAAGAATCGAATATTCATTGATCAAATCATTCACTCCATAGTCTGATCGATCTTTTCTTTTGAAGAACTGATTAATCGGACAAGAATAAAGATAGAGTCCCATTCTACATGTCAATATCAATACCGGCAACAATGAAATTTAGAGTAAGAGGAAAATCCGTCGACTTTAGAAATCGTGAGGGTTCAAGTCCTTCTTTTCCACCA
>CB15
CCTTCTCTGACTAGCTGCTATTGAGCCCCATCTACAAATAGGATAATTCTGTCTTAGTGGAGACGAGTTTTTGAAAATAACGGAGAAATACCGACTCTCTTGCAAGAGAGTCGGTATTTCTCAGTTATTTTTTATGTTTTTCTTTAGTAGTTTTTTATTTCTATCCTTTTTTTGGGGCAGTATTTTTATGCTTTTGCTTTGATTTTGTCTGATATTTTTGTTATGGTTATGGGCTCATATTCGTTATGTACCAGTATAATAATATTAGTTATTTGTTAATCCCACTAATAAAGTTCTAATTTTATTAATTCGATTCTAATTTTCGAATTTTTTAGTTTTTTTAATAGAAAATAAAAGAAAAGAGAAAGTTGTAATTTTATGCCTCTTAGATCTTCATTTCTATTTTAAATGGTAGAAATTGAAACCCTTTTATTAAATATTTTATTAAATAGAAATAAAAAAAATTTTAAATCGTGGAGGAAGGGGGGGCGGATGTAGCCAAGTGGATCAAGGCAGTGGATTGTGAATCCACCATGCGCGAGGAGTGGGGGGTGGGGGCGGATGTAGCCAAGTGGATCAAGGCAGTGGATTGTGAATCCACCATGCGCGAGTGGTGGCTGGCTTGGTATGGAACTACTAAGTGATAACTTTCAAATTCAGAGAAACCCTGGAATCAAAAATGGGTAATCCTGAGCCAAATCCTGTTTTACAAGAACAAACAAGGGTTCAGAAAGCGAAAAAAAAAGAAGGGGATAGGTGCAGAGACTCAACGGAAGCTGTTCTAAGAAATGGGGTTGACTGCCTTTTTTGGTAAAGAAAGGAAAAGAAATCCTTCTATCGAATATCGAAACTCCATAAAGGATGAAGGATAAGCGTATATACACTATGTATACACAATGAAAAACTATCTCAAAAATGACAACCGAATCCGTATTTTTTTTATGAAAAAGAAAAGAATTGTTATGAATCAATTCCAAGTTGAAGAAAGAATCGAATATTCATTGATCAAATCATTCACTCCATAGTCTGATCGATCTTTTCTTTTGAAGAACTGATTAATCGGACAAGAATAAAGATAGAGTCCCATTCTACATGTCAATATCAATACCGGCAACAATGAAATTTAGAGTAAGAGGAAAATCCGTCGACTTTAGAAATCGTGAGGGTTCAAGTCCTCCTTTCCCCCA
>CB16
CACTGACTGCTGCTATTGAGCCCCATCTACAAATGGATAATTCTGTCTTAGTGGAGACGAGTTTTTGAAAATAACGGAGAAATACCGACTCTCTTGCAAGAGAGTCGGTATTTCTCCGTTATTTTTTATGTTTTTCTTTAGTAGTTTTTTATTTCTATCCTTTTTTTACGAAAAGTATTTTTATGCTTTTGCTTTGATTTTGTCTGATATTTTTGTTATGGTTATGGGCTCATATTCGTTATGTACCAGTATAATAATATTAGTTATTTGTTAATCCCACTAATAAAGTTCTAATTTTATTAATTCGATTCTAATTTTCGAATTTTTTAGTTTTTTTAATAGAAAATAAAAGAAAAGAGAAAGTTGTAATTTTATGCCTCTTAGATCTTCATTTCTATTTTAAATGGTAGAAATTGAAACCTTTTTATTAAATATTTTATTAAATAGAAATAAAAAAATTTTTAAATCGTGGAGGAAGGGGGGGCGGATGTAGCCAAGTGGATCAAGGCAGTGGATTGTGAATCCACCATGCGCGACGAGGATTCATGAGCTTGGTATGGACTACTAAGTGATAACTTTCAAATTCAGAGAAACCCTGGAATCAAAAATGGGCAATCCTGAGCCAAATCCTGTTTTACAAGAACAAACAAGGGTTCAGAAAGCGAAAAAAAAAGAAGGGGATAGGTGCAGAGACTCAACGGAAGCTGTTCTAAGAAATGGGGTTGACTGCCTTTTTTGGTAAAGAAAGGAAAAGAAATCCTTCTATCGAATATCGAAACTCCATAAAGGATGAAGGATAAGCGTATATACACTATGTATACACAATGAAAAACTATCTCAAAAATGACAACCGAATCCGTATTTTTTTTATGAAAAAGAAAAGAATTGTTATGAATCAATTCCAAGTTGAAGAAAGAATCGAATATTCATTGATCAAATCATTCACTCCATAGTCTGATCGATCTTTTCTTTTGAAGAACTGATTAATCGGACAAGAATAAAGATAGAGTCCCATTCTACATGTCAATATCAATACCGGCAACAATGAAATTTAGAGTAAGAGGAAAATCCGTCGACTTTAGAAATCGTGAGGGTTCAAGTCCTTCCTATCCCCCCA
>CB17
CCTCTGACTAGCTGCTATTGAGCCCCATCTACAAATGGATAATTCTGTCTTAGTGGAGACGAGTTTTTGAAAATAACGGAGAAATACCGACTCTCTTGCAAGAGAGTCGGTATTTCTCCGTTATTTTTTATGTTTTTCTTTAGTAGTTTTTTATTTCTATCCTTTTTTTACGGGCAGTATTTTTATGCTTTTGCTTTGATTTTGTCTGATATTTTTGTTATGGTTATGGGCTCATATTCGTTATGTACCAGTATAATAATATTAGTTATTTGTTAATCCCACTAATAAAGTTCTAATTTTATTAATTCGATTCTAATTTTCGAATTTTTTAGTTTTTTTAATAGAAAATAAAAGAAAAGAGAAAGTTGTAATTTTATGCCTCTTAGATCTTCATTTCTATTTTAAATGGTAGAAATTGAAACCTTTTTATTAAATATTTTATTAAATAGAAATAAAAAAATTTTTAAATCGTGGAGGAAGGGGGGGCGGATGTAGCCAAGTGGATCAAGGCAGTGGATTGTGAATCCACCATGCGCGAGGAGTGGGGGGTGGGGGCGGATGTAGCCAAGTGGATCAAGGCAGTGGATTGTGAATCCACCATGCGCGAGTGGTTGATGGCTTGGTATGGAACTACTAAGTGATAACTTTCAAATTCAGAGAAACCCTGGAATCAAAAATGGGCAATCCTGAGCCAAATCCTGTTTTACAAGAACAAACAAGGGTTCAGAAAGCGAAAAAAAAAGAAGGGGATAGGTGCAGAGACTCAACGGAAGCTGTTCTAAGAAATGGGGTTGACTGCCTTTTTTGGTAAAGAAAGGAAAAGAAATCCTTCTATCGAATATCGAAACTCCATAAAGGATGAAGGATAAGCGTATATACACTATGTATACACAATGAAAAACTATCTCAAAAATGACAACCGAATCCGTATTTTTTTTATGAAAAAGAAAAGAATTGTTATGAATCAATTCCAAGTTGAAGAAAGAATCGAATATTCATTGATCAAATCATTCACTCCATAGTCTGATCGATCTTTTCTTTTGAAGAACTGATTAATCGGACAAGAATAAAGATAGAGTCCCATTCTACATGTCAATATCAATACCGGCAACAATGAAATTTAGAGTAAGAGGAAAATCCGTCGACTTTAGAAATCGTGAGGGTTCAAGTCTTTTCTATCCCCCCA
>CB18
ATTGCTGACTAGCTGCTATTGAGCCCCATCTACAAATGGATAATTCTGTCTTAGTGGAGACGAGTTTTTGAAAATAACGGAGAAATACCGACTCTCTTGCAAGAGAGTCGGTATTTCTCCGTTATTTTTTATGTTTTTCTTTAGTAGTTTTTTATTTCTATCCTTTTTTTGGGGCAGTATTTTTATGCTTTTGCTTTGATTTTGTCTGATATTTTTGTTATGGTTATGGGCTCATATTCGTTATGTACCAGTATAATAATATTAGTTATTTGTTAATCCCACTAATAAAGTTCTAATTTTATTAATTCGATTCTAATTTTCGAATTTTTTAGTTTTTTTAATAGAAAATAAAAGAAAAGAGAAAGTTGTAATTTTATGCCTCTTAGATCTTCATTTCTATTTTAAATGGTAGAAATTGAAACCTTTTTATTAAATATTTTATTAAATAGAAATAAAAAAATTTTTAAATCGTGGAGGAAGGGGGGGCGGATGTGGCCAAGTGGATCATGGCAGTGGATTGTGAATCCCCCAAACGCGACGAATGGTGGGATGAGCTTGGTATGGAACTACTAAGTGATAACTTTCAAATTCAGAGAAACCCTGGAATCAAAAATGGGCAATCCTGAGCCAAATCCTGTTTTACAAGAACAAACAAGGGTTCAGAAAGCGAAAAAAAAAGAAGGGGATAGGTGCAGAGACTCAACGGAAGCTGTTCTAAGAAATGGGGTTGACTGCCTTTTTTGGTAAAGAAAGGAAAAGAAATCCTTCTATCGAATATCGAAACTCCATAAAGGATGAAGGATAAGCGTATATACACTATGTATACACAATGAAAAACTATCTCAAAAATGACAACCGAATCCGTATTTTTTTTATGAAAAAGAAAAGAATTGTTATGAATCAATTCCAAGTTGAAGAAAGAATCGAATATTCATTGATCAAATCATTCACTCCATAGTCTGATCGATCTTTTCTTTTGAAGAACTGATTAATCGGACAAGAATAAAGATAGAGTCCCATTCTACATGTCAATATCAATACCGGCAACAATGAAATTTAGAGTAAGAGGAAAATCCGTCGACTTTAGAAATCGTGAGGGTTCAAGTCCTTCCTATTCCCCCA
>CB19
ATCGCTGACTAGCTGCTATTGAGCCCCATCTACAAATGGATAATTCTGTCTTAGTGGAGACGAGTTTTTGAAAATAACGGAGAAATACCGACTCTCTTGCAAGAGAGTCGGTATTTCTCAGTTATTTTTTATGTTTTTCTTTAGTAGTTTTTTATTTCTATCCTTTTTTTGGGGCAGTATTTTTATGCTTTTGCTTTGATTTTGTCTGATATTTTTGTTATGGTTATGGGCTCATATTCGTTATGTACCAGTATAATAATATTAGTTATTTGTTAATCCCACTAATAAAGTTCTAATTTTATTAATTCGATTCTAATTTTCGAATTTTTTAGTTTTTTTAATAGAAAATAAAAGAAAAGAGAAAGTTGTAATTTTATGCCTCTTAGATCTTCATTTCTATTTTAAATGGTAGAAATTGAAACCCTTTTATTAAATATTTTATTAAATAGAAATAAAAAAAATTTTAAATCGTGGAGGAAGGGGGGGCGGATGTAGCCAAGTGGATCAAGGCAGTGGATTGTGAATCCACCAAGCGCGACGAGTGGGGGGTGGGGGCGGATGTAGCCAAGTGGATCAAGGCAGTGGATTGTGAATCCACCATGCGCGAGTGCTGCTGGCTTGGTATGGACTACTAAGTGATAACTTTCAAATTCAGAGAAACCCTGGAATCAAAAATGGGTAATCCTGAGCCAAATCCTGTTTTACAAGAACAAACAAGGGTTCAGAAAGCGAAAAAAAAAGAAGGGGATAGGTGCAGAGACTCAACGGAAGCTGTTCTAAGAAATGGGGTTGACTGCCTTTTTTGGTAAAGAAAGGAAAAGAAATCCTTCTATCGAATATCGAAACTCCATAAAGGATGAAGGATAAGCGTATATACACTATGTATACACAATGAAAAACTATCTCAAAAATGACAACCGAATCCGTATTTTTTTTATGAAAAAGAAAAGAATTGTTATGAATCAATTCCAAGTTGAAGAAAGAATCGAATATTCATTGATCAAATCATTCACTCCATAGTCTGATCGATCTTTTCTTTTGAAGAACTGATTAATCGGACAAGAATAAAGATAGAGTCCCATTCTACATGTCAATATCAATACCGGCAACAATGAAATTTAGAGTAAGAGGAAAATCCGTCGACTTTAGAAATCGTGAGGGTTCAAGTCCCTCCTATCCCCCA
>CB20
ATCACTGACTAGCTGCTATTGAGCCCCATCTACAAATGGATAATTCTGTCTTAGTGGAGACGAGTTTTTGAAAATAACGGAGAAATACCGACTCTCTTGCAAGAGAGTCGGTATTTCTCAGTTATTTTTTATGTTTTTCTTTAGTAGTTTTTTATTTCTATCCTTTTTTTACGAAAAGTATTTTTATGCTTTTGCTTTGATTTTGTCTGATATTTTTGTTATGGTTATGGGCTCATATTCGTTATGTACCAGTATAATAATATTAGTTATTTGTTAATCCCACTAATAAAGTTCTAATTTTATTAATTCGATTCTAATTTTCGAATTTTTTAGTTTTTTTAATAGAAAATAAAAGAAAAGAGAAAGTTGTAATTTTATGCCTCTTAGATCTTCATTTCTATTTTAAATGGTAGAAATTGAAACCTTTTTATTAAATATTTTATTAAATAGAAATAAAAAAATTTTTAAATCGTGGAGGAAGGGGGGGCGGATGTAGCCAAGTGGATCAAGGCAGTGGATTGTGAATCCACCATGCGCGAGGAGTGGGGGGTGGGGGCGGATGTAGCCAAGTGGATCAAGGCAGTGGATTGTGAATCCACCATGCGCGAGTGGGGATGCATGAGCTTGGTATGGACTACTAAGTGATAACTTTCAAATTCAGAGAAACCCTGGAATCAAAAATGGGCAATCCTGAGCCAAATCCTGTTTTACAAGAACAAACAAGGGTTCAGAAAGCGAAAAAAAAAGAAGGGGATAGGTGCAGAGACTCAACGGAAGCTGTTCTAAGAAATGGGGTTGACTGCCTTTTTTGGTAAAGAAAGGAAAAGAAATCCTTCTATCGAATATCGAAACTCCATAAAGGATGAAGGATAAGCGTATATACACTATGTATACACAATGAAAAACTATCTCAAAAATGACAACCGAATCCGTATTTTTTTTATGAAAAAGAAAAGAATTGTTATGAATCAATTCCAAGTTGAAGAAAGAATCGAATATTCATTGATCAAATCATTCACTCCATAGTCTGATCGATCTTTTCTTTTGAAGAACTGATTAATCGGACAAGAATAAAGATAGAGTCCCATTCTACATGTCAATATCAATACCGGCAACAATGAAATTTAGAGTAAGAGGAAAATCCGTCGACTTTAGAAATCGTGAGGGTTCAAGTCCCTCCCTATCCCCA
>CB21
ATCTCTGACTAGCTGCTATTGAGCCCCATCTACAAATGGATAATTCTGTCTTAGTGGAGACGAGTTTTTGAAAATAACGGAGAAATACCGACTCTCTTGCAAGAGAGTCGGTATTTCTCCGTTATTTTTTATGTTTTTCTTTAGTAGTTTTTTATTTCTATCCTTTTTTTACGAAAAGTATTTTTATGCTTTTGCTTTGATTTTGTCTGATATTTTTGTTATGGTTATGGGCTCATATTCGTTATGTACCAGTATAATAATATTAGTTATTTGTTAATCCCACTAATAAAGTTCTAATTTTATTAATTCGATTCTAATTTTCGAATTTTTTAGTTTTTTTAATAGAAAATAAAAGAAAAGAGAAAGTTGTAATTTTATGCCTCTTAGATCTTCATTTCTATTTTAAATGGTAGAAATTGAAACCCTTTTATTAAATATTTTATTAAATAGAAATAAAAAAAATTTTAAATCGTGGAGGAAGGGGGGGCGGATGTAGCCAAGTGGATCAAGGCAGTGGATTGTGAATCCACCATGCGCGAAAGGGATGGATGGCTTGGTATGGAACTACTAAGTGATAACTTTCAAATTCAGAGAAACCCTGGAATCAAAAATGGGTAATCCTGAGCCAAATCCTGTTTTACAAGAACAAACAAGGGTTCAGAAAGCGAAAAAAAAAGAAGGGGATAGGTGCAGAGACTCAACGGAAGCTGTTCTAAGAAATGGGGTTGACTGCCTTTTTTGGTAAAGAAAGGAAAAGAAATCCTTCTATCGAATATCGAAACTCCATAAAGGATGAAGGATAAGCGTATATACACTATGTATACACAATGAAAAACTATCTCAAAAATGACAACCGAATCCGTATTTTTTTTATGAAAAAGAAAAGAATTGTTATGAATCAATTCCAAGTTGAAGAAAGAATCGAATATTCATTGATCAAATCATTCACTCCATAGTCTGATCGATCTTTTCTTTTGAAGAACTGATTAATCGGACAAGAATAAAGATAGAGTCCCATTCTACATGTCAATATCAATACCGGCAACAATGAAATTTAGAGTAAGAGGAAAATCCGTCGACTTTAGAAATCGTGAGGGTTCAAGTCCTTTCTTTCCACCA
>CB22
ATCACTGACTAGCTGCTATTGAGCCCCATCTACAAATGGATAATTCTGTCTTAGTGGAGACGAGTTTTTGAAAATAACGGAGAAATACCGACTCTCTTGCAAGAGAGTCGGTATTTCTCCGTTATTTTTTATGTTTTTCTTTAGTAATTTTTTATTTCTATCCTTTTTTTACGAAAAGTATTTTTATGCTTTTGCTTTGATTTTGTCTGATATTTTTGTTATGGTTATGGGCTCATATTCGTTATGTACCAGTATAATAATATTAGTTATTTGTTAATCCCACTAATAAAGTTCTAATTTTATTAATTCGATTCTAATTTTCGAATTTTTTAGTTTTTTTAATAAAAAATAAAAGAAAAGAGAAAGTTGTAATTTTATGCCTCTTAGATCTTCATTTCTATTTTAAATGGTAGAAATTGAAACCCTTTTATTAAATATTTTATTAAATAGAAATAAAAAAAATTTTAAATCGTGGAGGAAGGGGGGGCGGATGTAGCCAAGTGGATCAAGGCAGTGGATTGTGAATCCACCATGCGCGAGAAGATGGCTGAGCTTGGTATGGAACTACTAAGTGATAACTTTCAAATTCAGAGAAACCCTGGAATCAAAAATGGGTAATCCTGAGCCAAATCCTGTTTTACAAGAACAAACAAGGGTTCAGAAAGCGAAAAAAAAAGAAGGGGATAGGTGCAGAGACTCAACGGAAGCTGTTCTAAGAAATGGGGTTGACTGCCTTTTTTGGTAAAGAAAGGAAAAGAAATCCTTCTATCGAATATCGAAACTCCATAAAGGATGAAGGATAAGCGTATATACACTATGTATACACAATGAAAAACTATCTCAAAAATGACAACCGAATCCGTATTTTTTTTATGAAAAAGAAAAGAATTGTTATGAATCAATTCCAAGTTGAAGAAAGAATCGAATATTCATTGATCAAATCATTCACTCCATAGTCTGATCGATCTTTTCTTTTGAAGAACTGATTAATCGGACAAGAATAAAGATAGAGTCCCATTCTACATGTCAATATCAATACCGGCAACAATGAAATTTAGAGTAAGAGGAAAATCCGTCGACTTTAGAAATCGTGAGGGTTCAAGTCCTCTCTATTCCCCCA
>CB23
AATCACTGACTAGCTGCTATTGAGCCCCATCTACAAATGGATAATTCTGTCTTAGTGGAGACGAGTTTTTGAAAATAACGGAGAAATACCGACTCTCTTGCAAGAGAGTCGGTATTTCTCCGTTATTTTTTATGTTTTTCTTTAGTAGTTTTTTATTTCTATCCTTTTTTTACGAAAAGTATTTTTATGCTTTTGCTTTGATTTTGTCTGATATTTTTGTTATGGTTATGGGCTCATATTCGTTATGTACCAGTATAATAATATTAGTTATTTGTTAATCCCACTAATAAAGTTCTAATTTTATTAATTCGATTCTAATTTTCGAATTTTTTAGTTTTTTTAATAGAAAATAAAAGAAAAGAGAAAGTTGTAATTTTATGCCTCTTAGATCTTCATTTCTATTTTAAATGGTAGAAATTGAAACCTTTTTATTAAATATTTTATTAAATAGAAATAAAAAAATTTTTAAATCGTGGAGGAAGGGGGGGCGGATGTAGCCAAGTGGATCAAGGCAGTGGATTGTGAATCCACCATGCGCGAGGGGTGGGGGGTGGGGGCGGATGTAGCCAAGTGGATCAAGGCAGTGGATTGTGAATCCACCATGCGCGAGTGGTATGGCATGGCTTGGTATGGACTACTAAGTGATAACTTTCAAATTCAGAGAAACCCTGGAATCAAAAATGGGCAATCCTGAGCCAAATCCTGTTTTACAAGAACAAACAAGGGTTCAGAAAGCGAAAAAAAAAGAAGGGGATAGGTGCAGAGACTCAACGGAAGCTGTTCTAAGAAATGGGGTTGACTGCCTTTTTTGGTAAAGAAAGGAAAAGAAATCCTTCTATCGAATATCGAAACTCCATAAAGGATGAAGGATAAGCGTATATACACTATGTATACACAATGAAAAACTATCTCAAAAATGACAACCGAATCCGTATTTTTTTTATGAAAAAGAAAAGAATTGTTATGAATCAATTCCAAGTTGAAGAAAGAATCGAATATTCATTGATCAAATCATTCACTCCATAGTCTGATCGATCTTTTCTTTTGAAGAACTGATTAATCGGACAAGAATAAAGATAGAGTCCCATTCTACATGTCAATATCAATACCGGCAACAATGAAATTTAGAGTAAGAGGAAAATCCGTCGACTTTAGAAATCGTGAGGGTTCAAGTCCTTCCTTATCCCCCA
>XN01
ATCTTGACTAGCTGCTATTGAGCCCCATCTACAAATGGATAATTCTGTCTTAGTGGAGACGAGTTTTTGAAAATAACGGAGAAATACCGACTCTCTTGCAAGAGAGTCGGTATTTCTCAGTTATTTTTTATGTTTTTCTTTAGTAGTTTTTTATTTCTATCCTTTTTTTACGAAAAGTATTTTTATGCTTTTGCTTTGATTTTGTCTGATATTTTTGTTATGGTTATGGGCTCATATTCGTTATGTACCAGTATAATAATATTAGTTATTTGTTAATCCCACTAATAAAGTTCTAATTTTATTAATTCGATTCTAATTTTCGAATTTTTTAGTTTTTTTAATAGAAAATAAAAGAAAAGAGAAAGTTGTAATTTTATGCCTCTTAGATCTTCATTTCTATTTTAAATGGTAGAAATTGAAACCCTTTTATTAAATATTTTATTAAATAGAAATAAAAAAAATTTTAAATCGTGGAGGAAGGGGGGGCGGATGTAGCCAAGTGGATCAAGGCAGTGGATTGTGAATCCACCATGCGCGACGGGATGGCATGAGCTTGGTATGGAACCTACTAAGTGATAACTTTCAAATTCAGAGAAACCCTGGAATCAAAAATGGGCAATCCTGAGCCAAATCCTGTTTTACAAGAACAAACAAGGGTTCAGAAAGCGAAAAAAAAAGAAGGGGATAGGTGCAGAGACTCAACGGAAGCTGTTCTAAGAAATGGGGTTGACTGCCTTTTTTGGTAAAGAAAGGAAAAGAAATCCTTCTATCGAATATCGAAACTCCATAAAGGATGAAGGATAAGCGTATATACACTATGTATACACAATGAAAAACTATCTCAAAAATGACAACCGAATCCGTATTTTTTTTATGAAAAAGAAAAGAATTGTTATGAATCAATTCCAAGTTGAAGAAAGAATCGAATATTCATTGATCAAATCATTCACTCCATAGTCTGATCGATCTTTTCTTTTGAAGAACTGATTAATCGGACAAGAATAAAGATAGAGTCCCATTCTACATGTCAATATCAATACCGGCAACAATGAAATTTAGAGTAAGAGGAAAATCCGTCGACTTTAGAAATCGTGAGGGTTCAAGTCCCTCCCTATCCCCCA
>XN02
CACTGACTAGCTGCTATTGAGCCCCATCTACAAATGGATAATTCTGTCTTAGTGGAGACGAGTTTTTGAAAATAACGGAGAAATACCGACTCTCTTGCAAGAGAGTCGGTATTTCTCAGTTATTTTTTATGTTTTTCTTTAGTAGTTTTTTATTTCTATCCTTTTTTTGGAAAAGTATTTTTATGCTTTTGCTTTGATTTTGTCTGATATTTTTGTTATGGTTATGGGCTCATATTCGTTATGTACCAGTATAATAATATTAGTTATTTGTTAATCCCACTAATAAAGTTCTAATTTTATTAATTCGATTCTAATTTTCGAATTTTTTAGTTTTTTTAATAGAAAATAAAAGAAAAGAGAAAGTTGTAATTTTATGCCTCTTAAATCTTCATTTCTATTTTAAATGGTAGAAATTGAAACCCTTTTATTAAATATTTTATTAAATAGAAATAAAAAAAATTTTAAATCGTGGAGGAAGGGGGGGCGGATGTAGCCAAGTGGATCAAGGCAGTGGATTGTGAATCCACCATGCGCGAGGAGCTGGGGGGGGGGGGGGAATTTACCCAAGGGGATAAGGGGGTGGATTTGGAACTCCCCGTGGCGGGAACGGAGAAATACCGACTTTTTGCAGAGGATGGATGAGCTTGGTATGGAACTACTAAGTGATAACTTTCAAATTCAGAGAAACCCTGGAATCAAAAATGGGCAATCCTGAGCCAAATCCTGTTTTACAAGAACAAACAAGGGTTCAGAAAGCGAAAAAAAAAGAAGGGGATAGGTGCAGAGACTCAACGGAAGCTGTTCTAAGAAATGGGGTTGACTGCCTTTTTTGGTAAAGAAAGGAAAAGAAATCCTTCTATCGAATATCGAAACTCCATAAAGGATGAAGGATAAGCGTATATACACTATGTATACACAATGAAAAACTATCTCAAAAATGACAACCGAATCCGTATTTTTTTTATGAAAAAGAAAAGAATTGTTATGAATCAATTCCAAGTTGAAGAAAGAATCGAATATTCATTGATCAAATCATTCACTCCATAGTCTGATCGATCTTTTCTTTTGAAGAACTGATTAATCGGACAAGAATAAAGATAGAGTCCCATTCTACATGTCAATATCAATACCGGCAACAATGAAATTTAGAGTAAGAGGAAAATCCGTCGACTTTAGAAATCGTGAGGGTTCAAGTCCCTCCTATCCCCCA
>XN03
ATCACTGACTAGCTGCTATTGAGCCCCATCTACAAATGGATAATTCTGTCTTAGTGGAGACGAGTTTTTGAAAATAACGGAGAAATACCGACTCTCTTGCAAGAGAGTCGGTATTTCTCCGTTATTTTTTATGTTTTTCTTTAGTAGTTTTTTATTTCTATCCTTTTTTTGGGGCTGTATTTTTATGCTTTTGCTTTGATTTTGTCTGATATTTTTGTTATGGTTATGGGCTCATATTCGTTATGTACCAGTATAATAATATTAGTTATTTGTTAATCCCACTAATAAAGTTCTAATTTTATTAATTCGATTCTAATTTTCGAATTTTTTAGTTTTTTTAATAGAAAATAAAAGAAAAGAGAAAGTTGTAATTTTATGCCTCTTAGATCTTCATTTCTATTTTAAATGGTAGAAATTGAAACCCTTTTATTAAATATTTTATTAAATAGAAATAAAAAAAATTTTAAATCGTGGAGGAAGGGGGGGCGGATGTAGCCAAGTGGATCAAGGCAGTGGATTGTGAATCCACCATGCGCGACGAGCTGGGGGGGGGGGGGGAATTTACCCAAGGGGATCAGGGGGGGGAATTGAGACTCCCCCTCGAGCGAAACCGAGAAATACCGACTCTTTCAAAAGAGTCGGTGGTTGTGGCTTGGTTGGAACCTACTAAGTGATAACTTTCAAATTCAGAGAAACCCTGGAATCAAAAATGGGCAATCCTGAGCCAAATCCTGTTTTACAAGAACAAACAAGGGTTCAGAAAGCGAAAAAAAAAGAAGGGGATAGGTGCAGAGACTCAACGGAAGCTGTTCTAAGAAATGGGGTTGACTGCCTTTTTTGGTAAAGAAAGGAAAAGAAATCCTTCTATCGAATATCGAAACTCCATAAAGGATGAAGGATAAGCGTATATACACTATGTATACACAATGAAAAACTATCTCAAAAATGACAACCGAATCCGTATTTTTTTTATGAAAAAGAAAAGAATTGTTATGAATCAATTCCAAGTTGAAGAAAGAATCGAATATTCATTGATCAAATCATTCACTCCATAGTCTGATCGATCTTTTCTTTTGAAGAACTGATTAATCGGACAAGAATAAAGATAGAGTCCCATTCTACATGTCAATATCAATACCGGCAACAATGAAATTTAGAGTAAGAGGAAAATCCGTCGACTTTAGAAATCGTGAGGGTTCAAGTCTTTCCTATTCCCCAA
>XN04
ATCTTGACTAGACTGCTATTGAGCCCCATCTACAAATGGATAATTCTGTCTTAGTGGAGACGAGTTTTTGAAAATAACGGAGAAATACCGACTCTCTTGCAAGAGAGTCGGTATTTCTCCGTTATTTTTTATGTTTTTCTTTAGTAGTTTTTTATTTCTATCCTTTTTTTGGGGCTTTATTTTTATGCTTTTGCTTTGATTTTGTCTGATATTTTTGTTATGGTTATGGGCTCATATTCGTTATGTACCAGTATAATAATATTAGTTATTTGTTAATCCCACTAATAAAGTTCTAATTTTATTAATTCGATTCTAATTTTCGAATTTTTTAGTTTTTTTAATAGAAAATAAAAGAAAAGAGAAAGTTGTAATTTTATGCCTCTTAGATCTTCATTTCTATTTTAAATGGTAGAAATTGAAACCTTTTTATTAAATATTTTATTAAATAGAAATAAAAAAAATTTTAAATCGTGGAGGAAGGGGGGGCGGATGTAGCCAAGTGGATCAAGGCAGTGGATTGTGAATCCACCATGCGCGACGAGCTGGGGGGGGGGGGGGAAAATCTCCAAGGGGACAAGGGGGGGGAATGGAGACCCCCCCCTCGCAGAACGGAGAAAAAAGACTCTTTACATAAATCGTTGGGATGGCTTGGTATGGAACCTACTAAGTGATAACTTTCAAATTCAGAGAAACCCTGGAATCAAAAATGGGCAATCCTGAGCCAAATCCTGTTTTACAAGAACAAACAAGGGTTCAGAAAGCGAAAAAAAAAGAAGGGGATAGGTGCAGAGACTCAACGGAAGCTGTTCTAAGAAATGGGGTTGACTGCCTTTTTTGGTAAAGAAAGGAAAAGAAATCCTTCTATCGAATATCGAAACTCCATAAAGGATGAAGGATAAGCGTATATACACTATGTATACACAATGAAAAACTATCTCAAAAATGACAACCGAATCCGTATTTTTTTTATGAAAAAGAAAAGAATTGTTATGAATCAATTCCAAGTTGAAGAAAGAATCGAATATTCATTGATCAAATCATTCACTCCATAGTCTGATCGATCTTTTCTTTTGAAGAACTGATTAATCGGACAAGAATAAAGATAGAGTCCCATTCTACATGTCAATATCAATACCGGCAACAATGAAATTTAGAGTAAGAGGAAAATCCGTCGACTTTAGAAATCGTGAGGGTTCAAGTCCTCCCTATCCCCAA
>XN05
ATCTTGACTAGCTGCTATTGAGCCCCATCTACAAATGGATAATTCTGTCTTAGTGGAGACGAGTTTTTGAAAATAACGGAGAAATACCGACTCTCTTGCAAGAGAGTCGGTATTTCTCCGTTATTTTTTATGTTTTTCTTTAGTAGTTTTTTATTTCTATCCTTTTTTTACGAAAAGTATTTTTATGCTTTTGCTTTGATTTTGTCTGATATTTTTGTTATGGTTATGGGCTCATATTCGTTATGTACCAGTATAATAATATTAGTTATTTGTTAATCCCACTAATAAAGTTCTAATTTTATTAATTCGATTCTAATTTTCGAATTTTTTAGTTTTTTTAATAGAAAATAAAAGAAAAGAGAAAGTTGTAATTTTATGCCTCTTAGATCTTCATTTCTATTTTAAATGGTAGAAATTGAAACCCTTTTATTAAATATTTTATTAAATAGAAATAAAAAAAATTTTAAATCGTGGAGGAAGGGGGGGCGGATGTAGCCAAGTGGATCAAGGCAGTGGATTGTGAATCCACCATAAACGAGGAGCTGGGGGGGGGGGGGGGATGTACCCAATGGAACCAGGGTTGTGAATTGAAAACCCCCGTGGCGGGAACGGAGAAAAACCGACTTCTATAGAGAGGGGGGATGCATGAGCTTGGTATGGACTACTAAGTGATAACTTTCAAATTCAGAGAAACCCTGGAATCAAAAATGGGCAATCCTGAGCCAAATCCTGTTTTACAAGAACAAACAAGGGTTCAGAAAGCGAAAAAAAAAGAAGGGGATAGGTGCAGAGACTCAACGGAAGCTGTTCTAAGAAATGGGGTTGACTGCCTTTTTTGGTAAAGAAAGGAAAAGAAATCCTTCTATCGAATATCGAAACTCCATAAAGGATGAAGGATAAGCGTATATACACTATGTATACACAATGAAAAACTATCTCAAAAATGACAACCGAATCCGTATTTTTTTTATGAAAAAGAAAAGAATTGTTATGAATCAATTCCAAGTTGAAGAAAGAATCGAATATTCATTGATCAAATCATTCACTCCATAGTCTGATCGATCTTTTCTTTTGAAGAACTGATTAATCGGACAAGAATAAAGATAGAGTCCCATTCTACATGTCAATATCAATACCGGCAACAATGAAATTTAGAGTAAGAGGAAAATCCGTCGACTTTAGAAATCGTGAGGGTTCAAGTCCTTCCTATCCCCCA
>XN06
CTCAGACTAGCTGCTATTGAGCCCCATCTACAAATGGATAATTCTGTCTTAGTGGAGACGAGTTTTTGAAAATAACGGAGAAATACCGACTCTCTTGCAAGAGAGTCGGTATTTCTCCGTTATTTTTTATGTTTTTCTTTAGTAGTTTTTTATTTCTATCCTTTTTTTACGAAAAGTATTTTTATGCTTTTGCTTTGATTTTGTCTGATATTTTTGTTATGGTTATGGGCTCATATTCGTTATGTACCAGTATAATAATATTAGTTATTTGTTAATCCCACTAATAAAGTTCTAATTTTATTAATTCGATTCTAATTTTCGAATTTTTTAGTTTTTTTAATAGAAAATAAAAGAAAAGAGAAAGTTGTAATTTTATGCCTCTTAGATCTTCATTTCTATTTTAAATGGTAGAAATTGAAACCTTTTTATTAAATATTTTATTAAATAGAAATAAAAAAAATTTTAAATCGTGGAGGAAGGGGGGGCGGATGTAGCCAAGTGGATCAAGGCAGTGGATTGTGAATCCACCATGCGCGACGATGATGGCTTGGTATGGAACTACTAAGTGATAACTTTCAAATTCAGAGAAACCCTGGAATCAAAAATGGGCAATCCTGAGCCAAATCCTGTTTTACAAGAACAAACAAGGGTTCAGAAAGCGAAAAAAAAAGAAGGGGATAGGTGCAGAGACTCAACGGAAGCTGTTCTAAGAAATGGGGTTGACTGCCTTTTTTGGTAAAGAAAGGAAAAGAAATCCTTCTATCGAATATCGAAACTCCATAAAGGATGAAGGATAAGCGTATATACACTATGTATACACAATGAAAAACTATCTCAAAAATGACAACCGAATCCGTATTTTTTTTATGAAAAAGAAAAGAATTGTTATGAATCAATTCCAAGTTGAAGAAAGAATCGAATATTCATTGATCAAATCATTCACTCCATAGTCTGATCGATCTTTTCTTTTGAAGAACTGATTAATCGGACAAGAATAAAGATAGAGTCCCATTCTACATGTCAATATCAATACCGGCAACAATGAAATTTAGAGTAAGAGGAAAATCCGTCGACTTTAGAAATCGTGAGGGTTCAAGTCTTCTCTATTCCCCCA
>XN07
CTTTGACTAGCTGCTATTGAGCCCCATCTACAAATGGATAATTCTGTCTTAGTGGAGACGAGTTTTTGAAAATAACGGAGAAATACCGACTCTCTTGCAAGAGAGTCGGTATTTCTCAGTTATTTTTTATGTTTTTCTTTAGTAGTTTTTTATTTCTATCCTTTTTTTGGAAAAGTATTTTTATGCTTTTGCTTTGATTTTGTCTGATATTTTTGTTATGGTTATGGGCTCATATTCGTTATGTACCAGTATAATAATATTAGTTATTTGTTAATCCCACTAATAAAGTTCTAATTTTATTAATTCGATTCTAATTTTCGAATTTTTTAGTTTTTTTAATAGAAAATAAAAGAAAAGAGAAAGTTGTAATTTTATGCCTCTTAGATCTTCATTTCTATTTTAAATGGTAGAAATTGAAACCTTTTTATTAAATATTTTATTAAATAGAAATAAAAAAAATTTTAAATCGTGGAGGAAGGGGGGGCGGATGTAGCCAAGTGGATCAAGGCAGTGGATTGTGAATCCACCATGCGCGACGAGCTGGGATGGCATGGCTTGGTATGGAACCTACTAAGTGATAACTTTCAAATTCAGAGAAACCCTGGAATCAAAAATGGGCAATCCTGAGCCAAATCCTGTTTTACAAGAACAAACAAGGGTTCAGAAAGCGAAAAAAAAAGAAGGGGATAGGTGCAGAGACTCAACGGAAGCTGTTCTAAGAAATGGGGTTGACTGCCTTTTTTGGTAAAGAAAGGAAAAGAAATCCTTCTATCGAATATCGAAACTCCATAAAGGATGAAGGATAAGCGTATATACACTATGTATACACAATGAAAAACTATCTCAAAAATGACAACCGAATCCGTATTTTTTTTATGAAAAAGAAAAGAATTGTTATGAATCAATTCCAAGTTGAAGAAAGAATCGAATATTCATTGATCAAATCATTCACTCCATAGTCTGATCGATCTTTTCTTTTGAAGAACTGATTAATCGGACAAGAATAAAGATAGAGTCCCATTCTACATGTCAATATCAATACCGGCAACAATGAAATTTAGAGTAAGAGGAAAATCCGTCGACTTTAGAAATCGTGAGGGTTCAAGTCCTCCTATCCCCA
>XN08
CGTCTGTGACTGCTGCTATTGAGCCCCATCTACAAATGGATAATTCTGTCTTAGTGGAGACGAGTTTTTGAAAATAACGGAGAAATACCGACTCTCTTGCAAGAGAGTCGGTATTTCTCAGTTATTTTTTATGTTTTTCTTTAGTAGTTTTTTATTTCTATCCTTTTTTTGGGGCAGTATTTTTATGCTTTTGCTTTGATTTTGTCTGATATTTTTGTTATGGTTATGGGCTCATATTCGTTATGTACCAGTATAATAATATTAGTTATTTGTTAATCCCACTAATAAAGTTCTAATTTTATTAATTCGATTCTAATTTTCGAATTTTTTAGTTTTTTTAATAGAAAATAAAAGAAAAGAGAAAGTTGTAATTTTATGCCTCTTAGATCTTCATTTCTATTTTAAATGGTAGAAATTGAAACCTTTTTATTAAATATTTTATTAAATAGAAATAAAAAAAATTTTAAATCGTGGAGGAAGGGGGGGCGGATGTAGCCAAGTGGATCAAGGCAGTGGATTGTGAATCCACCATGCGCGAGGAGCTGGGGGGGGGGGGCGGCTGGCTTGGTATGGACTACTAAGTGATAACTTTCAAATTCAGAGAAACCCTGGAATCAAAAATGGGCAATCCTGAGCCAAATCCTGTTTTACAAGAACAAACAAGGGTTCAGAAAGCGAAAAAAAAAGAAGGGGATAGGTGCAGAGACTCAACGGAAGCTGTTCTAAGAAATGGGGTTGACTGCCTTTTTTGGTAAAGAAAGGAAAAGAAATCCTTCTATCGAATATCGAAACTCCATAAAGGATGAAGGATAAGCGTATATACACTATGTATACACAATGAAAAACTATCTCAAAAATGACAACCGAATCCGTATTTTTTTTATGAAAAAGAAAAGAATTGTTATGAATCAATTCCAAGTTGAAGAAAGAATCGAATATTCATTGATCAAATCATTCACTCCATAGTCTGATCGATCTTTTCTTTTGAAGAACTGATTAATCGGACAAGAATAAAGATAGAGTCCCATTCTACATGTCAATATCAATACCGGCAACAATGAAATTTAGAGTAAGAGGAAAATCCGTCGACTTTAGAAATCGTGAGGGTTCAAGTCCTTCCTATTCCCCCA
>XN09
ATTCTTCTAGACTAGCTGCTATTGAGCCCCATCTACAAATGGATAATTCTGTCTTAGTGGAGACGAGTTTTTGAAAATAACGGAGAAATACCGACTCTCTTGCAGAGAGTCGGTATTTCTCCGTTATTTTTTATGTTTTTCTTTAGTAGTTTTTTATTTCTATCCTTTTTTTACGAAAAGTATTTTTATGCTTTTGCTTTGATTTTGTCTGATATTTTTGTCATGGTTATGAGCTCATATTCGTTATGTACCAGTATAATAATATTAGTTATTTGTTAATCCCACTAATAAAGTTCTAATTTTATTAATTCGATTCTAATTTTCGAATTTTTTAGTTTTTTTAGTAGAAAATAAAAGAAAAGAGAAAGTTGTAATTTTATGCCTCTTAGATCTTCCTTTCTATTTTGCAAGGTAGAAATTGAGACCCTTTTATTAAAAATTTTCTTATCCACAAATACAAAAAATTTTATTTCTTGTTGGGAGGGGGGGGCGGCTGAGGTCTACAGGAGGAGGTGTATTGCATGAGCTTGGTATGGAACCTACTAAGTGATAACTTTCAAATTCAGAGAAACCCTGGAATCAAAAATGGGCAATCCTGAGCCAAATCCTGTTTTACAAGAACAAACAAGGGTTCAGAAAGCGAAAAAAAAAGAAGGGGATAGGTGCAGAGACTCAACGGAAGCTGTTCTAAGAAATGGGGTTGACTGCCTTTTTTGGTAAAGAAAGGAAAAGAAATCCTTCTATCGAATATCGAAACTCCATAAAGGATGAAGGATAAGCGTATATACACTATGTATACACAATGAAAAACTATCTCAAAAATGACAACCGAATCCGTATTTTTTTTATGAAAAAGAAAAGAATTGTTATGAATCAATTCCAAGTTGAAGAAAGAATCGAATATTCATTGATCAAATCATTCACTCCATAGTCTGATCGATCTTTTCTTTTGAAGAACTGATTAATCGGACAAGAATAAAGATAGAGTCCCATTCTACATGTCAATATCAATACCGGCAACAATGAAATTTAGAGTAAGAGGAAAATCCGTCGACTTTAGAAATCGTGAGGGTTCAAGTCCTCCTATCCCCCA
>XN10
AATCTCTGACTAGCTGCTATTGAGCCCCATCTACAAATGGATAATTCTGTCTTAGTGGAGACGAGTTTTTGAAAATAACGGAGAAATACCGACTCTCTTGCAAGAGAGTCGGTATTTCTCCGTTATTTTTTATGACTCGTTTCCACTAAGACAGAATTCTATCCTTTTTTTGGGGCTTCATTAGCAGCTAGGTCTAGAGGGAAGTGATGGACATTACTGTTATGGATATCAGCTCATATTCGTTATGTACCAGTATAATAATATTAGTTATTTGTTAATCCCACTAATAAAGTTCTAATTTTATTAATTCGATTCTAATTTTCGAATTTTTTAGTTTTTTTAATAGAAAATAAAAGAAAAGAGAAAGTTGTAATTTTATGCCTCTTAAAACTTACTTTCTATTTTGAATGAGAGAAATTGAAACCTTTTTTTTAAAAAATTTATTCTCCACAAATACAAAAAAATTTATTTGTTGATGGGGCTTGGGGCGGATGTAGGTCTAGAGGGAAAGGTGATGGTTAGTTTATTCACTATGAGCGATCATGCATGAGCTTGGTATGGACCTACTAAGTGATAACTTTCAAATTCAGAGAAACCCTGGAATCAAAAATGGGCAATCCTGAGCCAAATCCTGTTTTACAAGAACAAACAAGGGTTCAGAAAGCGAAAAAAAAAGAAGGGGATAGGTGCAGAGACTCAACGGAAGCTGTTCTAAGAAATGGGGTTGACTGCCTTTTTTGGTAAAGAAAGGAAAAGAAATCCTTCTATCGAATATCGAAACTCCATAAAGGATGAAGGATAAGCGTATATACACTATGTATACACAATGAAAAACTATCTCAAAAATGACAACCGAATCCGTATTTTTTTTATGAAAAAGAAAAGAATTGTTATGAATCAATTCCAAGTTGAAGAAAGAATCGAATATTCATTGATCAAATCATTCACTCCATAGTCTGATCGATCTTTTCTTTTGAAGAACTGATTAATCGGACAAGAATAAAGATAGAGTCCCATTCTACATGTCAATATCAATACCGGCAACAATGAAATTTAGAGTAAGAGGAAAATCCGTCGACTTTAGAAATCGTGAGGGTTCAAGTACCTCCTTTCCCCCCA
>XN11
ATTCTTCTAGACTAGCTGCTATTGAGCCCCATCTACAAATGGATAATTCTGTCTTAGTGGAGACGAGTTTTTGAAAATAACGGAGAAATACCGACTCTCTTGCAAGAGAGTCGGTATTTCTCCGTTATTTTTAATGTTTCGCTTCCACTAAGACAGAATTATCCATTTGTTTTTGGGGCTTCATTTGCAGCTAGGTCTAGAGGGAAGTTATGAATATTTTTGTCATGGTTATGGGCTCATATTCGTTATGTACCAGTATAATAATATTAGTTATTTGTTAATCCCACTAATAAAGTTCTAATTTTATTAATTCGATTCTAATTTTCGAATTTTTTAGTTTTTTTAATAGAAAATAAAAGAAAACAGAAAGTTGTAATTTTATGCCTCTTAAAAATTCATTTCTATTTTGAATGATAGAAATTGAAACCTTTTTTTTAAATATTTTATTAACCACAAATAAAAAAAATTTTAATTGTTGATGGAAGGGGGTACGGACTAGGTCTAGAGGAAAGTGGTAATGATTTGGTTCTCCCCTACCAGCGAGGATATTCAATGCATGAGCTTGGTATGGAACCTACTAAGTGATAACTTTCAAATTCAGAGAAACCCTGGAATCAAAAATGGGCAATCCTGAGCCAAATCCTGTTTTACAAGAACAAACAAGGGTTCAGAAAGCGAAAAAAAAAGAAGGGGATAGGTGCAGAGACTCAACGGAAGCTGTTCTAAGAAATGGGGTTGACTGCCTTTTTTGGTAAAGAAAGGAAAAGAAATCCTTCTATCGAATATCGAAACTCCATAAAGGATGAAGGATAAGCGTATATACACTATGTATACACAATGAAAAACTATCTCAAAAATGACAACCGAATCCGTATTTTTTTTATGAAAAAGAAAAGAATTGTTATGAATCAATTCCAAGTTGAAGAAAGAATCGAATATTCATTGATCAAATCATTCACTCCATAGTCTGATCGATCTTTTCTTTTGAAGAACTGATTAATCGGACAAGAATAAAGATAGAGTCCCATTCTACATGTCAATATCAATACCGGCAACAATGAAATTTAGAGTAAGAGGAAAATCCGTCGACTTTAGAAATCGTGAGGGTTCAAGTCCTCCTATCCCCCA
>NP01
TAACTAGCTGCTATTGAGCCCCATCTACAAATGGATAATTCTGTCTTAGTGGAGACGAGTTTTTGAAAATAACGGAGAAATACCGACTCTCTTGCAAGAGAGTCGGTATTTCTCCGTTATTTTTTATGTTTTTCTTTAGTAGTTTTTTATTTCTATCCTTTTTTTGGGGCTTTATTTTTATGCTTTTGCTTTGATTTTGTCTGATATTTTTGTTATGGTTATGGGCTCATATTCGTTATGTACCAGTATAATAATATTAGTTATTTGTTAATCCCACTAATAAAGTTCTAATTTTATTAATTCGATTCTAATTTTCGAATTTTTTAGTTTTTTTAATAGAAAATAAAAGAAAAGAGAAAGTTGTAATTTTATGCCTCTTAGATCTTCATTTCTATTTTAAATGGTAGAAATTGAAACCTTTTTATTAAATATTTTATTAAATAGAAATAAAAAAAATTTTAAATCGTGGAGGAAGGGGGGGCGGATGTAGCCAAGTGGATCAAGGCAGTGGATTGTGAATCCACCATGCGCGAAAAGGATGCATGAGCTTGGTATGGAACTACTAAGTGATAACTTTCAAATTCAGAGAAACCCTGGAATCAAAAATGGGCAATCCTGAGCCAAATCCTGTTTTACAAGAACAAACAAGGGTTCAGAAAGCGAAAAAAAAAGAAGGGGATAGGTGCAGAGACTCAACGGAAGCTGTTCTAAGAAATGGGGTTGACTGCCTTTTTTGGTAAAGAAAGGAAAAGAAATCCTATCGAAACTCCATAAAGGATGAAGGATAAGCGTATATACACTATGTATACACAATGAAAAACTATCTCAAAAATGACAACCGAATCCGTATTTTTTTTATGAAAAAGAAAAGAATTGTTATGAATCAATTCCAAGTTGAAGAAAGAATCGAATATTCATTGATCAAATCATTCACTCCATAGTCTGATCGATCTTTTCTTTTGAAGAACTGATTAATCGGACAAGAATAAAGATAGAGTCCCATTCTACATGTCAATATCAATACCGGCAACAATGAAATTTAGAGTAAGAGGAAAATCCGTCGACTTTAGAAATCGTGAGGGTTCAAGTCCTCCCTATCCCCCACTCCCCCATT
>NP02
ACTAGCTGCTATTGAGCCCCATCTACAAATGGATAATTCTGTCTTAGTGGAGACGAGTTTTTGAAAATAACGGAGAAATACCGACTCTCTTGCAAGAGAGTCGGTATTTCTCAGTTATTTTTTATGTTTTTCTTTAGTAGTTTTTTATTTCTATCCTTTTTTTACGAAAAGTATTTTTATGCTTTTGCTTTGATTTTGTCTGATATTTTTGTTATGGTTATGGGCTCATATTCGTTATGTACCAGTATAATAATATTAGTTATTTGTTAATCCCACTAATAAAGTTCTAATTTTATTAATTCGATTCTAATTTTCGAATTTTTTAGTTTTTTTAATAGAAAATAAAAGAAAAGAGAAAGTTGTAATTTTATGCCTCTTAGATCTTCATTTCTATTTTAAATGGTAGAAATTGAAACCTTTTTATTAAATATTTTATTAAATAGAAATAAAAAAAATTTTAAATCGTGGAGGAAGGGGGGGCGGATGTAGCCAAGTGGATCAAGGCAGTGGATTGTGAATCCACCATGCGCGACGGGAATGCTGGCTTGGTATGGAACCTACTAAGTGATAACTTTCAAATTCAGAGAAACCCTGGAATCAAAAATGGGCAATCCTGAGCCAAATCCTGTTTTACAAGAACAAACAAGGGTTCAGAAAGCGAAAAAAAAAGAAGGGGATAGGTGCAGAGACTCAACGGAAGCTGTTCTAAGAAATGGGGTTGACTGCCTTTTTTGGTAAAGAAAGGAAAAGAAATCCTTCTATCGAATATCGAAACTCCATAAAGGATGAAGGATAAGCGTATATACACTATGTATACACAATGAAAAACTATCTCAAAAATGACAACCGAATCCGTATTTTTTTTATGAAAAAGAAAAGAATTGTTATGAATCAATTCCAAGTTGAAGAAAGAATCGAATATTCATTGATCAAATCATTCACTCCATAGTCTGATCGATCTTTTCTTTTGAAGAACTGATTAATCGGACAAGAATAAAGATAGAGTCCCATTCTACATGTCAATATCAATACCGGCAACAATGAAATTTAGAGTAAGAGGAAAATCCGTCGACTTTAGAAATCGTGAGGGTTCAAGTCCCTTCTTTTCCCCCA
>NP03
ATTCCCTGACTGCTGCTATTGAGCCCCATCTACAAATGGATAATTCTGTCTTAGTGGAGACGAGTTTTTGAAAATAACGGAGAAATACCGACTCTCTTGCAAGAGAGTCGGTATTTCTCAGTTATTTTTTATGTTTTTCTTTAGTAGTTTTTTATTTCTATCCTTTTTTTACGAAAAGTATTTTTATGCTTTTGCTTTGATTTTGTCTGATATTTTTGTTATGGTTATGGGCTCATATTCGTTATGTACCAGTATAATAATATTAGTTATTTGTTAATCCCACTAATAAAGTTCTAATTTTATTAATTCGATTCTAATTTTCGAATTTTTTAGTTTTTTTAATAGAAAATAAAAGAAAAGAGAAAGTTGTAATTTTATGCCTCTTAGATCTTCATTTCTATTTTAAATGGTAGAAATTGAAACCTTTTTATTAAATATTTTATTAAATAGAAATAAAAAAAATTTTAAATCGTGGAGGAAGGGGGGGCGGATGTAGCCAAGTGGATCAAGGCAGTGGATTGTGAATCCACCATGCGCGATAGGTTGGCTGAGCTTGGTATGGAACCTACTAAGTGATAACTTTCAAATTCAGAGAAACCCTGGAATCAAAAATGGGCAATCCTGAGCCAAATCCTGTTTTACAAGAACAAACAAGGGTTCAGAAAGCGAAAAAAAAAGAAGGGGATAGGTGCAGAGACTCAACGGAAGCTGTTCTAAGAAATGGGGTTGACTGCCTTTTTTGGTAAAGAAAGGAAAAGAAATCCTTCTATCGAATATCGAAACTCCATAAAGGATGAAGGATAAGCGTATATACACTATGTATACACAATGAAAAACTATCTCAAAAATGACAACCGAATCCGTATTTTTTTTATGAAAAAGAAAAGAATTGTTATGAATCAATTCCAAGTTGAAGAAAGAATCGAATATTCATTGATCAAATCATTCACTCCATAGTCTGATCGATCTTTTCTTTTGAAGAACTGATTAATCGGACAAGAATAAAGATAGAGTCCCATTCTACATGTCAATATCAATACCGGCAACAATGAAATTTAGAGTAAGAGGAAAATCCGTCGACTTTAGAAATCGTGAGGGTTCAAGTCCTTCCTATCCCCCA
>NP04
ATCACTGACTAGCTGCTATTGAGCCCATCTACAAATGGATAATTCTGTCTTAGTGGAGACGAGTTTTTGAAAATAACGGAGAAATACCGACTCTCTTGCAAGAGAGTCGGTATTTCTCCGTTATTTTTTATGTTTTTCTTTAGTAGTTTTTTATTTCTATCCTTTTTTTGGGGCTGTATTTTTATGCTTTTGCTTTGATTTTGTCTGATATTTTTGTTATGGTTATGGGCTCATATTCGTTATGTACCAGTATAATAATATTAGTTATTTGTTAATCCCACTAATAAAGTTCTAATTTTATTAATTCGATTCTAATTTTCGAATTTTTTAGTTTTTTTAATAGAAAATAAAAGAAAAGAGAAAGTTGTAATTTTATGCCTCTTAGATCTTCATTTCTATTTTAAATGGTAGAAATTGAAACCTTTTTATTAAATATTTTATTAAATAGAAATAAAAAAAATTTTAAATCGTGGAGGAAGGGGGGGCGGATGTAGCCAAGTGGATCAAGGCAGTGGATTGTGAATCCACCATGCGCGAAAGCGGATTGATGGCTTGGTATGGACTACTAAGTGATAACTTTCAAATTCAGAGAAACCCTGGAATCAAAAATGGGCAATCCTGAGCCAAATCCTGTTTTACAAGAACAAACAAGGGTTCAGAAAGCGAAAAAAAAAGAAGGGGATAGGTGCAGAGACTCAACGGAAGCTGTTCTAAGAAATGGGGTTGACTGCCTTTTTTGGTAAAGAAAGGAAAAGAAATCCTATCGAAACTCCATAAAGGATGAAGGATAAGCGTATATACACTATGTATACACAATGAAAAACTATCTCAAAAATGACAACCGAATCCGTATTTTTTTTATGAAAAAGAAAAGAATTGTTATGAATCAATTCCAAGTTGAAGAAAGAATCGAATATTCATTGATCAAATCATTCACTCCATAGTCTGATCGATCTTTTCTTTTGAAGAACTGATTAATCGGACAAGAATAAAGATAGAGTCCCATTCTACATGTCAATATCAATACCGGCAACAATGAAATTTAGAGTAAGAGGAAAATCCGTCGACTTTAGAAATCGTGAGGGTTCAAGTCTTTCCTATCCCCCCA
>NP05
AGCGCTGACTAGCTGCTATTGAGCCCCATCTACAAATGGATAATTCTGTCTTAGTGGAGACGAGTTTTTGAAAATAACGGAGAAATACCGACTCTCTTGCAAGAGAGTCGGTATTTCTCAGTTATTTTTTATGTTTTTCTTTAGTAGTTTTTTATTTCTATCCTTTTTTTGGGGCAGTATTTTTATGCTTTTGCTTTGATTTTGTCTGATATTTTTGTTATGGTTATGGGCTCATATTCGTTATGTACCAGTATAATAATATTAGTTATTTGTTAATCCCACTAATAAAGTTCTAATTTTATTAATTCGATTCTAATTTTCGAATTTTTTAGTTTTTTTAATAGAAAATAAAAGAAAAGAGAAAGTTGTAATTTTATGCCTCTTAGATCTTCATTTCTATTTTAAATGGTAGAAATTGAAACCTTTTTATTAAATATTTTATTAAATAGAAATAAAAAAAATTTTAAATCGTGGAGGAAGGGGGGGCGGATGTAGCCAAGTGGATCAAGGCAGTGGATTGTGAATCCACCATGCGCGATGACCGGCATGGCTTGGTATGGAACTACTAAGTGATAACTTTCAAATTCAGAGAAACCCTGGAATCAAAAATGGGCAATCCTGAGCCAAATCCTGTTTTACAAGAACAAACAAGGGTTCAGAAAGCGAAAAAAAAAGAAGGGGATAGGTGCAGAGACTCAACGGAAGCTGTTCTAAGAAATGGGGTTGACTGCCTTTTTTGGTAAAGAAAGGAAAAGAAATCCTATCGAAACTCCATAAAGGATGAAGGATAAGCGTATATACACTATGTATACACAATGAAAAACTATCTCAAAAATGACAACCGAATCCGTATTTTTTTTATGAAAAAGAAAAGAATTGTTATGAATCAATTCCAAGTTGAAGAAAGAATCGAATATTCATTGATCAAATCATTCACTCCATAGTCTGATCGATCTTTTCTTTTGAAGAACTGATTAATCGGACAAGAATAAAGATAGAGTCCCATTCTACATGTCAATATCAATACCGGCAACAATGAAATTTAGAGTAAGAGGAAAATCCGTCGACTTTAGAAATCGTGAGGGTTCAAGTCCCTCCCTATCCCCCA
>NP06
AATCACTGACTAGCTGCTATTGAGCCCCATCTACAAATGGATAATTCTGTCTTAGTGGAGACGAGTTTTTGAAAATAACGGAGAAATACCGACTCTCTTGCAAGAGAGTCGGTATTTCTCCGTTATTTTTTATGTTTTTCCTTAGTAGTTTTTTATTTCTATCCTTTTTTTGGGGCAGTATTTTTATGCTTTTGCTTTGATTTTGTCTGATATTTTTGTTATGGTTATGGGCTCATATTCGTTATGTACCAGTATAATAATATTAGTTATTTGTTAATCCCACTAATAAAGTTCTAATTTTATTAATTCGATTCTAATTTTCGAATTTTTTAGTTTTTTTAATAGAAAATAAAAGAAAAGAGAAAGTTGTAATTTTATGCCTCTTAGATCTTCATTTCTATTTTAAATGGTAGAAATTGAAACCTTTTTATTAAATATTTTATTAAATAGAAATAAAAAAAATTTTAAATCGTGGAGGAAGGGGGGGCGGATGTAGCCAAGTGGATCAAGGCAGTGGATTGTGAATCCCCCATGCGCGATAGATGATGGCTTGGTATGGAACTACTAAGTGATAACTTTCAAATTCAGAGAAACCCTGGAATCAAAAATGGGCAATCCTGAGCCAAATCCTGTTTTACAAGAACAAACAAGGGTTCAGAAAGCGAAAAAAAAAGAAGGGGATAGGTGCAGAGACTCAACGGAAGCTGTTCTAAGAAATGGGGTTGACTGCCTTTTTTGGTAAAGAAAGGAAAAGAAATCCTTCTATCGAATATCGAAACTCCATAAAGGATGAAGGATAAGCGTATATACACTATGTATACACAATGAAAAACTATCTCAAAAATGACAACCGAATCCGTATTTTTTTTATGAAAAAGAAAAGAATTGTTATGAATCAATTCCAAGTTGAAGAAAGAATCGAATATTCATTGATCAAATCATTCACTCCATAGTCTGATCGATCTTTTCTTTTGAAGAACTGATTAATCGGACAAGAATAAAGATAGAGTCCCATTCTACATGTCAATATCAATACCGGCAACAATGAAATTTAGAGTAAGAGGAAAATCCGTCGACTTTAGAAATCGTGAGGGTTCAAGTCCCTCCTATCCCCCA
>NP07
ATCTTGACTAGCTGCTATTGAGCCCCATCTACAAATGGATAATTCTGTCTTAGTGGAGACGAGTTTTTGAAAATAACGGAGAAATACCGACTCTCTTGCAAGAGAGTCGGTATTTCTCCGTTATTTTTTATGTTTTTCTTTAGTAGTTTTTTATTTCTATCCTTTTTTTACGGGCAGTATTTTTATGCTTTTGCTTTGATTTTGTCTGATATTTTTGTTATGGTTATGGGCTCATATTCGTTATGTACCAGTATAATAATATTAGTTATTTGTTAATCCCACTAATAAAGTTCTAATTTTATTAATTCGATTCTAATTTTCGAATTTTTTAGTTTTTTTAATAGAAAATAAAAGAAAAGAGAAAGTTGTAATTTTATGCCTCTTAGATCTTCATTTCTATTTTAAATGGTAGAAATTGAAACCTTTTTATTAAATATTTTATTAAATAGAAATAAAAAAAATTTTAAATCGTGGAGGAAGGGGGGGCGGATGTAGCCAAGTGGATCAAGGCAGTGGATTGTGAATCCACCATGCGCGATAACCGAATGGCATGAGCTTGGTATGGACTACTAAGTGATAACTTTCAAATTCAGAGAAACCCTGGAATCAAAAATGGGCAATCCTGAGCCAAATCCTGTTTTACAAGAACAAACAAGGGTTCAGAAAGCGAAAAAAAAAGAAGGGGATAGGTGCAGAGACTCAACGGAAGCTGTTCTAAGAAATGGGGTTGACTGCCTTTTTTGGTAAAGAAAGGAAAAGAAATCCTTCTATCGAATATCGAAACTCCATAAAGGATGAAGGATAAGCGTATATACACTATGTATACACAATGAAAAACTATCTCAAAAATGACAACCGAATCCGTATTTTTTTTATGAAAAAGAAAAGAATTGTTATGAATCAATTCCAAGTTGAAGAAAGAATCGAATATTCATTGATCAAATCATTCACTCCATAGTCTGATCGATCTTTTCTTTTGAAGAACTGATTAATCGGACAAGAATAAAGATAGAGTCCCATTCTACATGTCAATATCAATACCGGCAACAATGAAATTTAGAGTAAGAGGAAAATCCGTCGACTTTAGAAATCGTGAGGGTTCAAGTCCCTTCTATCCCCCA
>NP09
TTTGACTAGCTGCTATTGAGCCCCATCTACAAATGGATAATTCTGTCTTAGTGGAGACGAGTTTTTGAAAATAACGGAGAAATACCGACTCTCTTGCAAGAGAGTCGGTATTTCTCAGTTATTTTTTATGTTTTTCTTTAGTAGTTTTTTATTTCTATCCTTTTTTTACGAAAAGTATTTTTATGCTTTTGCTTTGATTTTGTCTGATATTTTTGTTATGGTTATGGGCTCATATTCGTTATGTACCAGTATAATAATATTAGTTATTTGTTAATCCCACTAATAAAGTTCTAATTTTATTAATTCGATTCTAATTTTCGAATTTTTTAGTTTTTTTAATAGAAAATAAAAGAAAAGAGAAAGTTGTAATTTTATGCCTCTTAGATCTTCATTTCTATTTTAAATGGTAGAAATTGAAACCTTTTTATTAAATATTTTATTAAATAGAAATAAAAAAAATTTTAAATCGTGGAGGAAGGGGGGGCGGATGTAGCCAAGTGGATCAAGGCAGTGGATTGTGAATCCACCATGCGCGACGACGGGATGGCTTGGTATGGAACTACTAAGTGATAACTTTCAAATTCAGAGAAACCCTGGAATCAAAAATGGGCAATCCTGAGCCAAATCCTGTTTTACAAGAACAAACAAGGGTTCAGAAAGCGAAAAAAAAAGAAGGGGATAGGTGCAGAGACTCAACGGAAGCTGTTCTAAGAAATGGGGTTGACTGCCTTTTTTGGTAAAGAAAGGAAAAGAAATCCTATCGAAACTCCATAAAGGATGAAGGATAAGCGTATATACACTATGTATACACAATGAAAAACTATCTCAAAAATGACAACCGAATCCGTATTTTTTTTATGAAAAAGAAAAGAATTGTTATGAATCAATTCCAAGTTGAAGAAAGAATCGAATATTCATTGATCAAATCATTCACTCCATAGTCTGATCGATCTTTTCTTTTGAAGAACTGATTAATCGGACAAGAATAAAGATAGAGTCCCATTCTACATGTCAATATCAATACCGGCAACAATGAAATTTAGAGTAAGAGGAAAATCCGTCGACTTTAGAAATCGTGAGGGTTCAAGTCCCTTCTATCCCCCACTACCCCAA
>NP10
TCTGACTAGCTGCTATTGAGCCCCATCTACAAATGGATAATTCTGTCTTAGTGGAGACGAGTTTTTGAAAATAACGGAGAAATACCGACTCTCTTGCAAGAGAGTCGGTATTTCTCAGTTATTTTTTATGTTTTTCTTTAGTAGTTTTTTATTTCTATCCTTTTTTTGGGGCAGTATTTTTATGCTTTTGCTTTGATTTTGTCTGATATTTTTGTTATGGTTATGGGCTCATATTCGTTATGTACCAGTATAATAATATTAGTTATTTGTTAATCCCACTAATAAAGTTCTAATTTTATTAATTCGATTCTAATTTTCGAATTTTTTAGTTTTTTTAATAGAAAATAAAAGAAAAGAGAAAGTTGTAATTTTATGCCTCTTAGATCTTCATTTCTATTTTAAATGGTAGAAATTGAAACCTTTTTATTAAATATTTTATTAAATAGAAATAAAAAAAATTTTAAATCGTGGAGGAAGGGGGGGCGGATGTAGCCAAGTGGATCAAGGCAGTGGATTGTGAATCCACCATGCGCGACGAGCGGGATGGATGAGCTTGGTATGGACTACTAAGTGATAACTTTCAAATTCAGAGAAACCCTGGAATCAAAAATGGGCAATCCTGAGCCAAATCCTGTTTTACAAGAACAAACAAGGGTTCAGAAAGCGAAAAAAAAAGAAGGGGATAGGTGCAGAGACTCAACGGAAGCTGTTCTAAGAAATGGGGTTGACTGCCTTTTTTGGTAAAGAAAGGAAAAGAAATCCTTCTATCGAATATCGAAACTCCATAAAGGATGAAGGATAAGCGTATATACACTATGTATACACAATGAAAAACTATCTCAAAAATGACAACCGAATCCGTATTTTTTTTATGAAAAAGAAAAGAATTGTTATGAATCAATTCCAAGTTGAAGAAAGAATCGAATATTCATTGATCAAATCATTCACTCCATAGTCTGATCGATCTTTTCTTTTGAAGAACTGATTAATCGGACAAGAATAAAGATAGAGTCCCATTCTACATGTCAATATCAATACCGGCAACAATGAAATTTAGAGTAAGAGGAAAATCCGTCGACTTTAGAAATCGTGAGGGTTCAAGTCCCTCCCTATTCCCCA
>JL01
CGTCAGACTAGCTGCTATTGAGCCCCATCTACAAATGGATAATTCTGTCTTAGTGGAGACGAGTTTTTGAAAATAACGGAGAAATACCGACTCTCTTGCAAGAGAGTCGGTATTTCTCAGTTATTTTTTATGTTTTTCTTTAGTAGTTTTTTATTTCTATCCTTTTTTTACGAAAAGTATTTTTATGCTTTTGCTTTGATTTTGTCTGATATTTTTGTTATGGTTATGGGCTCATATTCGTTATGTACCAGTATAATAATATTAGTTATTTGTTAATCCCACTAATAAAGTTCTAATTTTATTAATTCGATTCTAATTTTCGAATTTTTTAGTTTTTTTAATAGAAAATAAAAGAAAAGAGAAAGTTGTAATTTTATGCCTCTTAGATCTTCATTTCTATTTTAAATGGTAGAAATTGAAACCTTTTTATTAAATATTTTATTAAATAGAAATAAAAAAAATTTTAAATCGTGGAGGAAGGGGGGGCGGATGTAGCCAAGTGGATCAAGGCAGTGGATTGTGAATCCACCATGCGCGACGAGGATGCATGAGCTTGGTATGGAACTACTAAGTGATAACTTTCAAATTCAGAGAAACCCTGGAATCAAAAATGGGCAATCCTGAGCCAAATCCTGTTTTACAAGAACAAACAAGGGTTCAGAAAGCGAAAAAAAAAGAAGGGGATAGGTGCAGAGACTCAACGGAAGCTGTTCTAAGAAATGGGGTTGACTGCCTTTTTTGGTAAAGAAAGGAAAAGAAATCCTATCGAAACTCCATAAAGGATGAAGGATAAGCGTATATACACTATGTATACACAATGAAAAACTATCTCAAAAATGACAACCGAATCCGTATTTTTTTTATGAAAAAGAAAAGAATTGTTATGAATCAATTCCAAGTTGAAGAAAGAATCGAATATTCATTGATCAAATCATTCACTCCATAGTCTGATCGATCTTTTCTTTTGAAGAACTGATTAATCGGACAAGAATAAAGATAGAGTCCCATTCTACATGTCAATATCAATACCGGCAACAATGAAATTTAGAGTAAGAGGAAAATCCGTCGACTTTAGAAATCGTGAGGGTTCAAGTCCTCCCTATTCCCCCA
>JL02
ATCGCTGACTAGCTGCTATTGAGCCCCATCTACAAATGGATAATTCTGTCTTAGTGGAGACGAGTTTTTGAAAATAACGGAGAAATACCGACTCTCTTGCAAGAGAGTCGGTATTTCTCCGTTATTTTTTATGTTTTTCTTTAGTAGTTTTTTATTTCTATCCTTTTTTTGGGGCAGTATTTTTATGCTTTTGCTTTGATTTTGTCTGATATTTTTGTTATGGTTATGGGCTCATATTCGTTATGTACCAGTATAATAATATTAGTTATTTGTTAATCCCACTAATAAAGTTCTAATTTTATTAATTCGATTCTAATTTTCGAATTTTTTAGTTTTTTTAATAGAAAATAAAAGAAAAGAGAAAGTTGTAATTTTATGCCTCTTAGATCTTCATTTCTATTTTAAATGGTAGAAATTGAAACCTTTTTATTAAATATTTTATTAAATAGAAATAAAAAAAATTTTAAATCGTGGAGGAAGGGGGGGCGGATGTAGCCAAGTGGATCAAGGCAGTGGATTGTGAATCCACCAAGCGCGAGACCGATTGGATGGCTTGGTATGGAACTACTAAGTGATAACTTTCAAATTCAGAGAAACCCTGGAATCAAAAATGGGCAATCCTGAGCCAAATCCTGTTTTACAAGAACAAACAAGGGTTCAGAAAGCGAAAAAAAAAGAAGGGGATAGGTGCAGAGACTCAACGGAAGCTGTTCTAAGAAATGGGGTTGACTGCCTTTTTTGGTAAAGAAAGGAAAAGAAATCCTTCTATCGAATATCGAAACTCCATAAAGGATGAAGGATAAGCGTATATACACTATGTATACACAATGAAAAACTATCTCAAAAATGACAACCGAATCCGTATTTTTTTTATGAAAAAGAAAAGAATTGTTATGAATCAATTCCAAGTTGAAGAAAGAATCGAATATTCATTGATCAAATCATTCACTCCATAGTCTGATCGATCTTTTCTTTTGAAGAACTGATTAATCGGACAAGAATAAAGATAGAGTCCCATTCTACATGTCAATATCAATACCGGCAACAATGAAATTTAGAGTAAGAGGAAAATCCGTCGACTTTAGAAATCGTGAGGGTTCAAGTCCTTCCTATTCCCCCA
>JL03
ATCACTGACTAGCTGCTATTGAGCCCCATCTACAAATGGATAATTCTGTCTTAGTGGAGACGAGTTTTTGAAAATAACGGAGAAATACCGACTCTCTTGCAAGAGAGTCGGTATTTCTCCGTTATTTTTTATGTTTTTCTTTAGTAGTTTTTTATTTCTATCCTTTTTTTGGGGCTGTATTTTTATGCTTTTGCTTTGATTTTGTCTGATATTTTTGTTATGGTTATGGGCTCATATTCGTTATGTACCAGTATAATAATATTAGTTATTTGTTAATCCCACTAATAAAGTTCTAATTTTATTAATTCGATTCTAATTTTCGAATTTTTTAGTTTTTTTAATAGAAAATAAAAGAAAAGAGAAAGTTGTAATTTTATGCCTCTTAGATCTTCATTTCTATTTTAAATGGTAGAAATTGAAACCTTTTTATTAAATATTTTATTAAATAGAAATAAAAAAAATTTTAAATCGTGGAGGAAGGGGGGGCGGATGTAGCCAAGTGGATCAAGGCAGTGGATTGTGAATCCACCAAGCGCGAAAGGATGGATGGCTTGGTATGGAACTACTAAGTGATAACTTTCAAATTCAGAGAAACCCTGGAATCAAAAATGGGCAATCCTGAGCCAAATCCTGTTTTACAAGAACAAACAAGGGTTCAGAAAGCGAAAAAAAAAGAAGGGGATAGGTGCAGAGACTCAACGGAAGCTGTTCTAAGAAATGGGGTTGACTGCCTTTTTTGGTAAAGAAAGGAAAAGAAATCCTTCTATCGAATATCGAAACTCCATAAAGGATGAAGGATAAGCGTATATACACTATGTATACACAATGAAAAACTATCTCAAAAATGACAACCGAATCCGTATTTTTTTTATGAAAAAGAAAAGAATTGTTATGAATCAATTCCAAGTTGAAGAAAGAATCGAATATTCATTGATCAAATCATTCACTCCATAGTCTGATCGATCTTTTCTTTTGAAGAACTGATTAATCGGACAAGAATAAAGATAGAGTCCCATTCTACATGTCAATATCAATACCGGCAACAATGAAATTTAGAGTAAGAGGAAAATCCGTCGACTTTAGAAATCGTGAGGGTTCAAGTCCCTCCCTATCCCCCA
>JL04
AATCTTGACTAGCTGCTATTGAGCCCCATCTACAAATGGATAATTCTGTCTTAGTGGAGACGAGTTTTTGAAAATAACGGAGAAATACCGACTCTCTTGCAAGAGAGTCGGTATTTCTCCGTTATTTTTTATGTTTTTCTTTAGTAGTTTTTTATTTCTATCCTTTTTTTGGGGCAGTATTTTTATGCTTTTGCTTTGATTTTGTCTGATATTTTTGTTATGGTTATGGGCTCATATTCGTTATGTACCAGTATAATAATATTAGTTATTTGTTAATCCCACTAATAAAGTTCTAATTTTATTAATTCGATTCTAATTTTCGAATTTTTTAGTTTTTTTAATAGAAAATAAAAGAAAAGAGAAAGTTGTAATTTTATGCCTCTTAGATCTTCATTTCTATTTTAAATGGTAGAAATTGAAACCTTTTTATTAAATATTTTATTAAATAGAAATAAAAAAAATTTTAAATCGTGGAGGAAGGGGGGGCGGATGTAGCCAAGTGGATCAAGGCAGTGGATTGTGAATCCACCAAACCGCGAGGAGTTTATGGATGAGCTTGGTATGGAACTACTAAGTGATAACTTTCAAATTCAGAGAAACCCTGGAATCAAAAATGGGCAATCCTGAGCCAAATCCTGTTTTACAAGAACAAACAAGGGTTCAGAAAGCGAAAAAAAAAGAAGGGGATAGGTGCAGAGACTCAACGGAAGCTGTTCTAAGAAATGGGGTTGACTGCCTTTTTTGGTAAAGAAAGGAAAAGAAATCCTTCTATCGAATATCGAAACTCCATAAAGGATGAAGGATAAGCGTATATACACTATGTATACACAATGAAAAACTATCTCAAAAATGACAACCGAATCCGTATTTTTTTTATGAAAAAGAAAAGAATTGTTATGAATCAATTCCAAGTTGAAGAAAGAATCGAATATTCATTGATCAAATCATTCACTCCATAGTCTGATCGATCTTTTCTTTTGAAGAACTGATTAATCGGACAAGAATAAAGATAGAGTCCCATTCTACATGTCAATATCAATACCGGCAACAATGAAATTTAGAGTAAGAGGAAAATCCGTCGACTTTAGAAATCGTGAGGGTTCAAGTCTTCCCTATTCCCCCA
>JL05
CCCCTGACTAGCTGCTATTGAGCCCCATCTACAAATGGATAATTCTGTCTTAGTGGAGACGAGTTTTTGAAAATAACGGAGAAATACCGACTCTCTTGCAAGAGAGTCGGTATTTCTCAGTTATTTTTTATGTTTTTCTTTAGTAGTTTTTTATTTCTATCCTTTTTTTGGAAAAGTATTTTTATGCTTTTGCTTTGATTTTGTCTGATATTTTTGTTATGGTTATGGGCTCATATTCGTTATGTACCAGTATAATAATATTAGTTATTTGTTAATCCCACTAATAAAGTTCTAATTTTATTAATTCGATTCTAATTTTCGAATTTTTTAGTTTTTTTAATAGAAAATAAAAGAAAAGAGAAAGTTGTAATTTTATGCCTCTTAGATCTTCATTTCTATTTTAAATGGTAGAAATTGAAACCTTTTTATTAAATATTTTATTAAATAGAAATAAAAAAAATTTTAAATCGTGGAGGAAGGGGGGGCGGATGTAGCCAAGTGGATCAAGGCAGTGGATTGTGAATCCACCATGCGCGAGGAGCGGATGGCATGAGCTTGGTATGGAACTACTAAGTGATAACTTTCAAATTCAGAGAAACCCTGGAATCAAAAATGGGCAATCCTGAGCCAAATCCTGTTTTACAAGAACAAACAAGGGTTCAGAAAGCGAAAAAAAAAGAAGGGGATAGGTGCAGAGACTCAACGGAAGCTGTTCTAAGAAATGGGGTTGACTGCCTTTTTTGGTAAAGAAAGGAAAAGAAATCCTTCTATCGAATATCGAAACTCCATAAAGGATGAAGGATAAGCGTATATACACTATGTATACACAATGAAAAACTATCTCAAAAATGACAACCGAATCCGTATTTTTTTTATGAAAAAGAAAAGAATTGTTATGAATCAATTCCAAGTTGAAGAAAGAATCGAATATTCATTGATCAAATCATTCACTCCATAGTCTGATCGATCTTTTCTTTTGAAGAACTGATTAATCGGACAAGAATAAAGATAGAGTCCCATTCTACATGTCAATATCAATACCGGCAACAATGAAATTTAGAGTAAGAGGAAAATCCGTCGACTTTAGAAATCGTGAGGGTTCAAGTCCCTTCCTATCCCCCA
>JL06
ATCTCTGACTAGCTGCTATTGAGCCCCATCTACAAATGGATAATTCTGTCTTAGTGGAGACGAGTTTTTGAAAATAACGGAGAAATACCGACTCTCTTGCAAGAGAGTCGGTATTTCTCAGTTATTTTTTATGTTTTTCTTTAGTAGTTTTTTATTTCTATCCTTTTTTTGGAAAAGTATTTTTATGCTTTTGCTTTGATTTTGTCTGATATTTTTGTTATGGTTATGGGCTCATATTCGTTATGTACCAGTATAATAATATTAGTTATTTGTTAATCCCACTAATAAAGTTCTAATTTTATTAATTCGATTCTAATTTTCGAATTTTTTAGTTTTTTTAATAGAAAATAAAAGAAAAGAGAAAGTTGTAATTTTATGCCTCTTAGATCTTCATTTCTATTTTAAATGGTAGAAATTGAAACCTTTTTATTAAATATTTTATTAAATAGAAATAAAAAAAATTTTAAATCGTGGAGGAAGGGGGGGCGGATGTAGCCAAGTGGATCAAGGCAGTGGATTGTGAATCCACCATGCGCGAGAGTTGATGGCATGAGCTTGGTATGGACCTACTAAGTGATAACTTTCAAATTCAGAGAAACCCTGGAATCAAAAATGGGCAATCCTGAGCCAAATCCTGTTTTACAAGAACAAACAAGGGTTCAGAAAGCGAAAAAAAAAGAAGGGGATAGGTGCAGAGACTCAACGGAAGCTGTTCTAAGAAATGGGGTTGACTGCCTTTTTTGGTAAAGAAAGGAAAAGAAAAGAATTGTTATGAATCAATTCCAAGTTGAAGAAAGAATCGAATATTCATTGATCAAATCATTCACTCCATAGTCTGATCGATCTTTTCTTTTGAAGAACTGATTAATCGGACAAGAATAAAGATAGAGTCCCATTCTACATGTCAATATCAATACCGGCAACAATGAAATTTAGAGTAAGAGGAAAATCCGTCGACTTTAGAAATCGTGAGGGTTCAAGTCCCTCCTATCCCCCA
>JL07
TTCTTGACTAGCTGCTATTGAGCCCCATCTACAAATGGATAATTCTGTCTTAGTGGAGACGAGTTTTTGAAAATAACGGAGAAATACCGACTCTCTTGCAAGAGAGTCGGTATTTCTCCGTTATTTTTTATGTTTTTCTTTAGTAGTTTTTTATTTCTATCCTTTTTTTACGAAAAGTATTTTTATGCTTTTGCTTTGATTTTGTCTGATATTTTTGTTATGGTTATGGGCTCATATTCGTTATGTACCAGTATAATAATATTAGTTATTTGTTAATCCCACTAATAAAGTTCTAATTTTATTAATTCGATTCTAATTTTCGAATTTTTTAGTTTTTTTAATAGAAAATAAAAGAAAAGAGAAAGTTGTAATTTTATGCCTCTTAGATCTTCATTTCTATTTTAAATGGTAGAAATTGAAACCTTTTTATTAAATATTTTATTAAATAGAAATAAAAAAAATTTTAAATCGTGGAGGAAGGGGGGGCGGATGTAGCCAAGTGGATCAAGGCAGTGGATTGTGAATCCACCATGCGCGAAAAGTGGCATGGCTGGTATGGAACTACTAAGTGATAACTTTCAAATTCAGAGAAACCCTGGAATCAAAAATGGGCAATCCTGAGCCAAATCCTGTTTTACAAGAACAAACAAGGGTTCAGAAAGCGAAAAAAAAAGAAGGGGATAGGTGCAGAGACTCAACGGAAGCTGTTCTAAGAAATGGGGTTGACTGCCTTTTTTGGTAAAGAAAGGAAAAGAAATCCTTCTATCGAATATCGAAACTCCATAAAGGATGAAGGATAAGCGTATATACACTATGTATACACAATGAAAAACTATCTCAAAAATGACAACCGAATCCGTATTTTTTTTATGAAAAAGAAAAGAATTGTTATGAATCAATTCCAAGTTGAAGAAAGAATCGAATATTCATTGATCAAATCATTCACTCCATAGTCTGATCGATCTTTTCTTTTGAAGAACTGATTAATCGGACAAGAATAAAGATAGAGTCCCATTCTACATGTCAATATCAATACCGGCAACAATGAAATTTAGAGTAAGAGGAAAATCCGTCGACTTTAGAAATCGTGAGGGTTCAAGTCCCTCCCTATTCCCCCA
>JL08
ATCGCTGACTGCTGCTATTGAGCCCCATCTACAAATGGATAATTCTGTCTTAGTGGAGACGAGTTTTTGAAAATAACGGAGAAATACCGACTCTCTTGCAAGAGAGTCGGTATTTCTCAGTTATTTTTTATGTTTTTCTTTAGTAGTTTTTTATTTCTATCCTTTTTTTGGAAAAGTATTTTTATGCTTTTGCTTTGATTTTGTCTGATATTTTTGTTATGGTTATGGGCTCATATTCGTTATGTACCAGTATAATAATATTAGTTATTTGTTAATCCCACTAATAAAGTTCTAATTTTATTAATTCGATTCTAATTTTCGAATTTTTTAGTTTTTTTAATAGAAAATAAAAGAAAAGAGAAAGTTGTAATTTTATGCCTCTTAGATCTTCATTTCTATTTTAAATGGTAGAAATTGAAACCTTTTTATTAAATATTTTATTAAATAGAAATAAAAAAAATTTTAAATCGTGGAGGAAGGGGGGGCGGATGTAGCCAAGTGGATCAAGGCAGTGGATTGTGAATCCACCATGCGCGAGGAGATGGATGGATGAGCTTGGTATGGAACCTACTAAGTGATAACTTTCAAATTCAGAGAAACCCTGGAATCAAAAATGGGCAATCCTGAGCCAAATCCTGTTTTACAAGAACAAACAAGGGTTCAGAAAGCGAAAAAAAAAGAAGGGGATAGGTGCAGAGACTCAACGGAAGCTGTTCTAAGAAATGGGGTTGACTGCCTTTTTTGGTAAAGAAAGGAAAAGAAATCCTTCTATCGAATATCGAAACTCCATAAAGGATGAAGGATAAGCGTATATACACTATGTATACACAATGAAAAACTATCTCAAAAATGACAACCGAATCCGTATTTTTTTTATGAAAAAGAAAAGAATTGTTATGAATCAATTCCAAGTTGAAGAAAGAATCGAATATTCATTGATCAAATCATTCACTCCATAGTCTGATCGATCTTTTCTTTTGAAGAACTGATTAATCGGACAAGAATAAAGATAGAGTCCCATTCTACATGTCAATATCAATACCGGCAACAATGAAATTTAGAGTAAGAGGAAAATCCGTCGACTTTAGAAATCGTGAGGGTTCAAGTCCCTCCTATCCCCA
>JL09
AATCACTGACTAGCTGCTATTGAGCCCCATCTACAAATGGATAATTCTGTCTTAGTGGAGACGAGTTTTTGAAAATAACGGAGAAATACCGACTCTCTTGCAAGAGAGTCGGTATTTCTCAGTTATTTTTTATGTTTTTCTTTAGTAGTTTTTTATTTCTATCCTTTTTTTACGAAAAGTATTTTTATGCTTTTGCTTTGATTTTGTCTGATATTTTTGTTATGGTTATGGGCTCATATTCGTTATGTACCAGTATAATAATATTAGTTATTTGTTAATCCCACTAATAAAGTTCTAATTTTATTAATTCGATTCTAATTTTCGAATTTTTTAGTTTTTTTAATAGAAAATAAAAGAAAAGAGAAAGTTGTAATTTTATGCCTCTTAGATCTTCATTTCTATTTTAAATGGTAGAAATTGAAACCTTTTTATTAAATATTTTATTAAATAGAAATAAAAAAAATTTTAAATCGTGGAGGAAGGGGGGGCGGATGTAGCCAAGTGGATCAAGGCAGTGGATTGTGAATCCACCATGCGCGAAAGGATGATGGCTTGGTATGGAACCTACTAAGTGATAACTTTCAAATTCAGAGAAACCCTGGAATCAAAAATGGGCAATCCTGAGCCAAATCCTGTTTTACAAGAACAAACAAGGGTTCAGAAAGCGAAAAAAAAAGAAGGGGATAGGTGCAGAGACTCAACGGAAGCTGTTCTAAGAAATGGGGTTGACTGCCTTTTTTGGTAAAGAAAGGAAAAGAAATCCTTCTATCGAATATCGAAACTCCATAAAGGATGAAGGATAAGCGTATATACACTATGTATACACAATGAAAAACTATCTCAAAAATGACAACCGAATCCGTATTTTTTTTATGAAAAAGAAAAGAATTGTTATGAATCAATTCCAAGTTGAAGAAAGAATCGAATATTCATTGATCAAATCATTCACTCCATAGTCTGATCGATCTTTTCTTTTGAAGAACTGATTAATCGGACAAGAATAAAGATAGAGTCCCATTCTACATGTCAATATCAATACCGGCAACAATGAAATTTAGAGTAAGAGGAAAATCCGTCGACTTTAGAAATCGTGAGGGTTCAAGTCCTCCTTTTCCCCA
>JL10
TTCACTGACTAGCTGCTATTGAGCCCCATCTACAAATGGATAATTCTGTCTTAGTGGAGACGAGTTTTTGAAAATAACGGAGAAATACCGACTCTCTTGCAAGAGAGTCGGTATTTCTCAGTTATTTTTTATGTTTTTCTTTAGTAGTTTTTTATTTCTATCCTTTTTTTGGGGCAGTATTTTTATGCTTTTGCTTTGATTTTGTCTGATATTTTTGTTATGGTTATGGGCTCATATTCGTTATGTACCAGTATAATAATATTAGTTATTTGTTAATCCCACTAATAAAGTTCTAATTTTATTAATTCGATTCTAATTTTCGAATTTTTTAGTTTTTTTAATAGAAAATAAAAGAAAAGAGAAAGTTGTAATTTTATGCCTCTTAGATCTTCATTTCTATTTTAAATGGTAGAAATTGAAACCTTTTTATTAAATATTTTATTAAATAGAAATAAAAAAAATTTTAAATCGTGGAGGAAGGGGGGGCGGATGTAGCCAAGTGGATCAAGGCAGTGGATTGTGAATCCACCATGCGCGAGACGAATGATGAGCTTGGTATGGAACTACTAAGTGATAACTTTCAAATTCAGAGAAACCCTGGAATCAAAAATGGGCAATCCTGAGCCAAATCCTGTTTTACAAGAACAAACAAGGGTTCAGAAAGCGAAAAAAAAAGAAGGGGATAGGTGCAGAGACTCAACGGAAGCTGTTCTAAGAAATGGGGTTGACTGCCTTTTTTGGTAAAGAAAGGAAAAGAAATCCTTCTATCGAATATCGAAACTCCATAAAGGATGAAGGATAAGCGTATATACACTATGTATACACAATGAAAAACTATCTCAAAAATGACAACCGAATCCGTATTTTTTTTATGAAAAAGAAAAGAATTGTTATGAATCAATTCCAAGTTGAAGAAAGAATCGAATATTCATTGATCAAATCATTCACTCCATAGTCTGATCGATCTTTTCTTTTGAAGAACTGATTAATCGGACAAGAATAAAGATAGAGTCCCATTCTACATGTCAATATCAATACCGGCAACAATGAAATTTAGAGTAAGAGGAAAATCCGTCGACTTTAGAAATCGTGAGGGTTCAAGTCCTTCCTATCCCCCA
>JL11
ATCACTTACTGCTGCTATTGAGCCCCATCTACAAATGGATAATTCTGTCTTAGTGGAGACGAGTTTTTGAAAATAACGGAGAAATACCGACTCTCTTGCAAGAGAGTCGGTATTTCTCCGTTATTTTCAATGTTTTTCTTTAGTAGTTTTTTATTTCTATCCTTTTTTTGGGGCTGTATTTTTATGCTTTTGCTTTGGAAGTGTCTGATATTTTTGTTATGGTTATGGGCTCATATTCGTTATGTACCAGTATAATAATATTAGTTATTTGTTAATCCCACTAATAAAGTTCTAATTTTATTAATTCGATTCTAATTTTCGAATTTTTTAGTTTTTTTAATAGAAAATAAAAGAAAAGAGAAAGTTGTAATTTTATGCCTCTTAGATCTTCATTTCTATTTTAAATGGTAGAAATTGAAACCTTTTTATTAAATATTTTATTAAATAGAAATAAAAAAAATTTTAAATCGTGGAGGAAGGGGGGGCGGATGTAGCCAAGTGGATCAAGGCAGTGGATTGTGAATCCACCATGCGCGAAAGATTGCATGGCTTGGTATGGAACCTACTAAGTGATAACTTTCAAATTCAGAGAAACCCTGGAATCAAAAATGGGCAATCCTGAGCCAAATCCTGTTTTACAAGAACAAACAAGGGTTCAGAAAGCGAAAAAAAAAGAAGGGGATAGGTGCAGAGACTCAACGGAAGCTGTTCTAAGAAATGGGGTTGACTGCCTTTTTTGGTAAAGAAAGGAAAAGAAATCCTTCTATCGAATATCGAAACTCCATAAAGGATGAAGGATAAGCGTATATACACTATGTATACACAATGAAAAACTATCTCAAAAATGACAACCGAATCCGTATTTTTTTTATGAAAAAGAAAAGAATTGTTATGAATCAATTCCAAGTTGAAGAAAGAATCGAATATTCATTGATCAAATCATTCACTCCATAGTCTGATCGATCTTTTCTTTTGAAGAACTGATTAATCGGACAAGAATAAAGATAGAGTCCCATTCTACATGTCAATATCAATACCGGCAACAATGAAATTTAGAGTAAGAGGAAAATCCGTCGACTTTAGAAATCGTGAGGGTTCAAGTCCTTCCTTTCCCCCA
>JL12
ATCGCTGACTAGCTGCTATTGAGCCCCATCTACAAATGGATAATTCTGTCTTAGTGGAGACGAGTTTTTGAAAATAACGGAGAAATACCGACTCTCTTGCAAGAGAGTCGGTATTTCTCCGTTATTTTTTATGTTTTTCTTTAGTAGTTTTTTTTTTCTATCCTTTTTTTACCAAAATTATTTTTATGCTTTTGCTTTGATTTTGACTGATATTATTGTCATGGTGATGGGCTCATGTTCGTTATGTACCAGTATAATAATATTAGTTATTTGTTAATCCCACTAATAAAGTTCTAATTTTATTAATTCGATTCTGATTTTCGAATTTTTTAGTTTTTTTAATACAAAATAAAAGAAAAGAGAAAGTTGTAATTTTATGCCTCTTAGATCTTCATTTCTATTTTAAATGGTAGAAATTGAAACCTTTTTATTAAATATGTTGGTGGATAAAAATAAAAAAAATTTTAAATCGTGGAGGAAGGGGGGGCGGATGTAGCCAAGTGGATCAAGGCAGTGGATTGTGAATCCACCATGCGCGAAATATTGATGGCTTGGTATGGAACTACTAAGTGATAACTTTCAAATTCAGAGAAACCCTGGAATCAAAAATGGGCAATCCTGAGCCAAATCCTGTTTTACAAGAACAAACAAGGGTTCAGAAAGCGAAAAAAAAAGAAGGGGATAGGTGCAGAGACTCAACGGAAGCTGTTCTAAGAAATGGGGTTGACTGCCTTTTTTGGTAAAGAAAGGAAAAGAAATCCTTCTATCGAATATCGAAACTCCATAAAGGATGAAGGATAAGCGTATATACACTATGTATACACAATGAAAAACTATCTCAAAAATGACAACCGAATCCGTATTTTTTTTATGAAAAAGAAAAGAATTGTTATGAATCAATTCCAAGTTGAAGAAAGAATCGAATATTCATTGATCAAATCATTCACTCCATAGTCTGATCGATCTTTTCTTTTGAAGAACTGATTAATCGGACAAGAATAAAGATAGAGTCCCATTCTACATGTCAATATCAATACCGGCAACAATGAAATTTAGAGTAAGAGGAAAATCCGTCGACTTTAGAAATCGTGAGGGTTCAAGTCCTTCCTATCCCCCA
>JL13
ATCGCTGACTAGCTGCTATTGAGCCCCATCTACAAATGGATAATTCTGTCTTAGTGGAGACGAGTTTTTGAAAATAACGGAGAAATACCGACTCTCTTGCAAGAGAGTCGGTATTTCTCAGTTATTTTTTATGTTTTTCTTTAGTAGTTTTTTATTTCTATCCTTTTTTTGGGGCAGTATTTTTATGCTTTTGCTTTGATTTTGTCTGATATTTTTGTTATGGTTATGGGCTCATATTCGTTATGTACCAGTATAATAATATTAGTTATTTGTTAATCCCACTAATAAAGTTCTAATTTTATTAATTCGATTCTAATTTTCGAATTTTTTAGTTTTTTTAATAGAAAATAAAAGAAAAGAGAAAGTTGTAATTTTATGCCTCTTAGATCTTCATTTCTATTTTAAATGGTAGAAATTGAAACCTTTTTATTAAATATTTTATTAAATAGAAATAAAAAAAATTTTAAATCGTGGAGGAAGGGGGGGCGGATGTAGCCAAGTGGATCAAGGCAGTGGATTGTGAATCCACCATGCGCGAGAAGATGCATGGCTTGGTATGGAACTACTAAGTGATAACTTTCAAATTCAGAGAAACCCTGGAATCAAAAATGGGCAATCCTGAGCCAAATCCTGTTTTACAAGAACAAACAAGGGTTCAGAAAGCGAAAAAAAAAGAAGGGGATAGGTGCAGAGACTCAACGGAAGCTGTTCTAAGAAATGGGGTTGACTGCCTTTTTTGGTAAAGAAAGGAAAAGAAATCCTTCTATCGAATATCGAAACTCCATAAAGGATGAAGGATAAGCGTATATACACTATGTATACACAATGAAAAACTATCTCAAAAATGACAACCGAATCCGTATTTTTTTTATGAAAAAGAAAAGAATTGTTATGAATCAATTCCAAGTTGAAGAAAGAATCGAATATTCATTGATCAAATCATTCACTCCATAGTCTGATCGATCTTTTCTTTTGAAGAACTGATTAATCGGACAAGAATAAAGATAGAGTCCCATTCTACATGTCAATATCAATACCGGCAACAATGAAATTTAGAGTAAGAGGAAAATCCGTCGACTTTAGAAATCGTGAGGGTTCAAGTCTTTCCTATTCCCCCA
>JL14
ATCGCTGACTAGCTGCTATTGAGCCCCATCTACAAATGGATAATTCTGTCTTAGTGGAGACGAGTTTTTGAAAATAACGGAGAAATACCGACTCTCTTGCAAGAGAGTCGGTATTTCTCAGTTATTTTTTATGTTTTTCTTTAGTAGTTTTTTATTTCTATCCTTTTTTTGGGGCTGTATTTTTATGCTTTTGCTTTGATTTTGTCTGATATTTTTGTTATGGTTATGGGCTCATATTCGTTATGTACCAGTATAATAATATTAGTTATTTGTTAATCCCACTAATAAAGTTCTAATTTTATTAATTCGATTCTAATTTTCGAATTTTTTAGTTTTTTTAATAGAAAATAAAAGAAAAGAGAAAGTTGTAATTTTATGCCTCTTAGATCTTCATTTCTATTTTAAATGGTAGAAATTGAAACCTTTTTATTAAATATTTTATTAAATAGAAATAAAAAAAATTTTAAATCGTGGAGGAAGGGGGGGCGGATGTAGCCAAGTGGATCAAGGCAGTGGATTGTGAATCCACCATGCGCGAAAGATGGATGAGCTTGGTATGGAACTACTAAGTGATAACTTTCAAATTCAGAGAAACCCTGGAATCAAAAATGGGCAATCCTGAGCCAAATCCTGTTTTACAAGAACAAACAAGGGTTCAGAAAGCGAAAAAAAAAGAAGGGGATAGGTGCAGAGACTCAACGGAAGCTGTTCTAAGAAATGGGGTTGACTGCCTTTTTTGGTAAAGAAAGGAAAAGAAATCCTTCTATCGAATATCGAAACTCCATAAAGGATGAAGGATAAGCGTATATACACTATGTATACACAATGAAAAACTATCTCAAAAATGACAACCGAATCCGTATTTTTTTTATGAAAAAGAAAAGAATTGTTATGAATCAATTCCAAGTTGAAGAAAGAATCGAATATTCATTGATCAAATCATTCACTCCATAGTCTGATCGATCTTTTCTTTTGAAGAACTGATTAATCGGACAAGAATAAAGATAGAGTCCCATTCTACATGTCAATATCAATACCGGCAACAATGAAATTTAGAGTAAGAGGAAAATCCGTCGACTTTAGAAATCGTGAGGGTTCAAGTCCCTCCTATTCCCCCA
>JL15
ATCACTGACTAGCTGCTATTGAGCCCCATCTACAAATGGATAATTCTGTCTTAGTGGAGACGAGTTTTTGAAAATAACGGAGAAATACCGACTCTCTTGCAAGAGAGTCGGTATTTCTCCGTTATTTTTTATGTTTTTCTTTAGTAGTTTTTTATTTCTATCCTTTTTTTGGGGCAGTATTTTTATGCTTTTGCTTTGATTTTGTCTGATATTTTTGTTATGGTTATGGGCTCATATTCGTTATGTACCAGTATAATAATATTAGTTATTTGTTAATCCCACTAATAAAGTTCTAATTTTATTAATTCGATTCTAATTTTCGAATTTTTTAGTTTTTTTAATAGAAAATAAAAGAAAAGAGAAAGTTGTAATTTTATGCCTCTTAGATCTTCATTTCTATTTTAAATGGTAGAAATTGAAACCTTTTTATTAAATATTTTATTAAATAGAAATAAAAAAAATTTTAAATCGTGGAGGAAGGGGGGGCGGATGTAGCCAAGTGGATCAAGGCAGTGGATTGTGAATCCACCATGCGCGAAATGGATGGATGGCTTGGTATGGAACCTACTAAGTGATAACTTTCAAATTCAGAGAAACCCTGGAATCAAAAATGGGCAATCCTGAGCCAAATCCTGTTTTACAAGAACAAACAAGGGTTCAGAAAGCGAAAAAAAAAGAAGGGGATAGGTGCAGAGACTCAACGGAAGCTGTTCTAAGAAATGGGGTTGACTGCCTTTTTTGGTAAAGAAAGGAAAAGAAATCCTTCTATCGAATATCGAAACTCCATAAAGGATGAAGGATAAGCGTATATACACTATGTATACACAATGAAAAACTATCTCAAAAATGACAACCGAATCCGTATTTTTTTTATGAAAAAGAAAAGAATTGTTATGAATCAATTCCAAGTTGAAGAAAGAATCGAATATTCATTGATCAAATCATTCACTCCATAGTCTGATCGATCTTTTCTTTTGAAGAACTGATTAATCGGACAAGAATAAAGATAGAGTCCCATTCTACATGTCAATATCAATACCGGCAACAATGAAATTTAGAGTAAGAGGAAAATCCGTCGACTTTAGAAATCGTGAGGGTTCAAGTCCCTCCTATCCCCCA
>JL16
AGTCGCTGACTAGCTGCTATTGAGCCCCATCTACAAATGGATAATTCTGTCTTAGTGGAGACGAGTTTTTGAAAATAACGGAGAAATACCGACTCTCTTGCAAGAGAGTCGGTATTTCTCCGTTATTTTTTATGTTTTTCTTTAGTAGTTTTTTATTTCTATCCTTTTTTTGGGGCAGTATTTTTATGCTTTTGCTTTGATTTTGTCTGATATTTTTGTTATGGTTATGGGCTCATATTCGTTATGTACCAGTATAATAATATTAGTTATTTGTTAATCCCACTAATAAAGTTCTAATTTTATTAATTCGATTCTAATTTTCGAATTTTTTAGTTTTTTTAATAGAAAATAAAAGAAAAGAGAAAGTTGTAATTTTATGCCTCTTAGATCTTCATTTCTATTTTAAATGGTAGAAATTGAAACCTTTTTATTAAATATTTTATTAAATAGAAATAAAAAAAATTTTAAATCGTGGAGGAAGGGGGGGCGGATGTAGCCAAGTGGATCAAGGCAGTGGATTGTGAATCCACCATGCGCGATGAAGGATGCATGAGCTTGGTATGGACCTACTAAGTGATAACTTTCAAATTCAGAGAAACCCTGGAATCAAAAATGGGCAATCCTGAGCCAAATCCTGTTTTACAAGAACAAACAAGGGTTCAGAAAGCGAAAAAAAAAGAAGGGGATAGGTGCAGAGACTCAACGGAAGCTGTTCTAAGAAATGGGGTTGACTGCCTTTTTTGGTAAAGAAAGGAAAAGAAATCCTTCTATCGAATATCGAAACTCCATAAAGGATGAAGGATAAGCGTATATACACTATGTATACACAATGAAAAACTATCTCAAAAATGACAACCGAATCCGTATTTTTTTTATGAAAAAGAAAAGAATTGTTATGAATCAATTCCAAGTTGAAGAAAGAATCGAATATTCATTGATCAAATCATTCACTCCATAGTCTGATCGATCTTTTCTTTTGAAGAACTGATTAATCGGACAAGAATAAAGATAGAGTCCCATTCTACATGTCAATATCAATACCGGCAACAATGAAATTTAGAGTAAGAGGAAAATCCGTCGACTTTAGAAATCGTGAGGGTTCAAGTCCCTCCCTATTCCCCCA
>JL17
ACTAGCTGCTATTGAGCCCCATCTACAAATGGATAATTCTGTCTTAGTGGAGACGAGTTTTTGAAAATAACGGAGAAATACCGACTCTCTTGCAAGAGAGTCGGTATTTCTCAGTTATTTTTTATGTTTTTCTTTAGTAGTTTTTTATTTCTATCCTTTTTTTGGGGCTTTATTTTTATGCTTTTGCTTTGGAAGTGTCTGATATTTTTGTTATGGTTATGGGCTCATATTCGTTATGTACCAGTATAATAATATTAGTTATTTGTTAATCCCACTAATAAAGTTCTAATTTTATTAATTCGATTCTAATTTTCGAATTTTTTAGTTTTTTTAATAGAAAATAAAAGAAAAGAGAAAGTTGTAATTTTATGCCTCTTAGATCTTCATTTCTATTTTAAATGGTAGAAATTGAAACCTTTTTATTAAATATTTTATTAAATAGAAATAAAAAAAATTTTAAATCGTGGAGGAAGGGGGGGCGGATGTAGCCAAGTGGATCAAGGCAGTGGATTGTGAATCCACCATGCGCGAGACAATGATGATCTGGCTATGGAACTACTAAGTGATAACTTTCAAATTCAGAGAAACCCTGGAATCAAAAATGGGCAATCCTGAGCCAAATCCTGTTTTACAAGAACAAACAAGGGTTCAGAAAGCGAAAAAAAAAGAAGGGGATAGGTGCAGAGACTCAACGGAAGCTGTTCTAAGAAATGGGGTTGACTGCCTTTTTTGGTAAAGAAAGGAAAAGAAATCCTTCTATCGAATATCGAAACTCCATAAAGGATGAAGGATAAGCGTATATACACTATGTATACACAATGAAAAACTATCTCAAAAATGACAACCGAATCCGTATTTTTTTTATGAAAAAGAAAAGAATTGTTATGAATCAATTCCAAGTTGAAGAAAGAATCGAATATTCATTGATCAAATCATTCACTCCATAGTCTGATCGATCTTTTCTTTTGAAGAACTGATTAATCGGACAAGAATAAAGATAGAGTCCCATTCTACATGTCAATATCAATACCGGCAACAATGAAATTTAGAGTAAGAGGAAAATCCGTCGACTTTAGAAATCGTGAGGGTTCAAGTCCTTCCTATCCCCA
>JL18
TTCTTGACTAGACTGCTATTGAGCCCCATCTACAAATGGATAATTCTGTCTTAGTGGAGACGAGTTTTTGAAAATAACGGAGAAATACCGACTCTCTTGCAAGAGAGTCGGTATTTCTCCGTTATTTTTTATGTTTTTCTTTAGTAGTTTTTTATTTCTATCCTTTTTTTGGAAAAGTATTTTTATGCTTTTGCTTTGATTTTGTCTGATATTTTTGTTATGGTTATGGGCTCATATTCGTTATGTACCAGTATAATAATATTAGTTATTTGTTAATCCCACTAATAAAGTTCTAATTTTATTAATTCGATTCTAATTTTCGAATTTTTTAGTTTTTTTAATAGAAAATAAAAGAAAAGAGAAAGTTGTAATTTTATGCCTCTTAGATCTTCATTTCTATTTTAAATGGTAGAAATTGAAACCTTTTTATTAAATATTTTATTAAATAGAAATAAAAAAAATTTTAAATCGTGGAGGAAGGGGGGGCGGATGTAGCCAAGTGGATCAAGGCAGTGGATTGTGAATCCACCATGCGCGAAATCCGGCATGGTTGGAACCTACTAAGTGATAACTTTCAAATTCAGAGAAACCCTGGAATCAAAAATGGGCAATCCTGAGCCAAATCCTGTTTTACAAGAACAAACAAGGGTTCAGAAAGCGAAAAAAAAAGAAGGGGATAGGTGCAGAGACTCAACGGAAGCTGTTCTAAGAAATGGGGTTGACTGCCTTTTTTGGTAAAGAAAGGAAAAGAAATCCTTCTATCGAATATCGAAACTCCATAAAGGATGAAGGATAAGCGTATATACACTATGTATACACAATGAAAAACTATCTCAAAAATGACAACCGAATCCGTATTTTTTTTATGAAAAAGAAAAGAATTGTTATGAATCAATTCCAAGTTGAAGAAAGAATCGAATATTCATTGATCAAATCATTCACTCCATAGTCTGATCGATCTTTTCTTTTGAAGAACTGATTAATCGGACAAGAATAAAGATAGAGTCCCATTCTACATGTCAATATCAATACCGGCAACAATGAAATTTAGAGTAAGAGGAAAATCCGTCGACTTTAGAAATCGTGAGGGTTCAAGTCTTTCCTTATCCCCA
>DC01
ATTCACTGACTAGCTGCTATTGAGCCCCATCTACAAATGGATAATTCTGTCTTAGTAGAGACGAGTTTTTGAAAATAACGGAGAAATACCGACTCTCTTGCAAGAGAGTCGGTATTTCTCCGTTATTTTTTATGTTTTTCTTTAATAGTTTTTTATTTCTATCTTTTTTTTACGAAAAGTATTTTTATGCTTTTGCTTTTATTTTGTCTGATATTTTTGTTATGGTTATGAGCTCATATTCGTTATGTACCAGTATAATAATATTAGTTATTTGTTAATCCCACTAATAAAGTTCTAATTTTATTAATTCGATTCTAATTTTCGAATTTTTTAGTTTTTTTAATATAAAATAAAAGAAAAGAGAAAGTTGTAATTTTATGCCTCTTAGATCTTCATTTCTATTTTAAATGGTAGAAATTGAAACCTTTTTATTAAATATTTTATTAAATAGAAATAAAAAAAATTTTAAATCGTGGAGGAAGGGGGGGCGGATGTAGCCAAGTGGATCAAGGCAGTGGATTGTGAATCCACCATACGCGAGAAGCTCGCATGCTGAGCTTGGTATGGAACCTACTAAGTGATAACTTTCAAATTCAGAGAAACCCTGGAATCAAAAATGGGCAATCCTGAGCCAAATCCTGTTTTACAAGAACAAACAAGGGTTCAGAAAGCGAAAAAAAAAAAAGGGGGATAGGTGCAAAAACTCAACGGAAGCTGTTCTAAAAAATGGGGTTGACTGCCTTTTTTGGTAAAAAAAGGAAAAAAAATCCTTCTATCGAATATCGAAACTCCATAAAGGATGAAGGATAAGCGTATATACACTATGTATACACAATGAAAAACTATCTCAAAAATGACAACCGAATCCGTATTTTTTTTTATGAAAAAAAAAAAAATTGTTATGAATCAATTCCAAGTTGAAAAAAAAATCGAATATTCTTTGATCAAATCATTCCCTCCATAGTCTGATCGATCTTTTCTTTTGAAAAACTGATTAATCGGACAAAAATAAAAATAGAGTCCCATTCTACATGTCAATATCAATACCGGCAACAATGAAATTTAAAGTAAGAGGAAAATCCGTCAACTTTAAAAATCGGGAGGGTTCAAGTCCTTTTTTTCCCC
>DC02
AGTGTTGACTAGCTGCTATTGAGCCCCATCTACAAATGGATAATTCTGTCTTAGTAGAGACGAGTTTTTGAAAATAACGGAGAAATACCGACTCTCTTGCAAGAGAGTCGGTATTTCTCCGTTATTTTTTATGTTTTTCTTTAATAGTTTTTTATTTCTATCTTTTTTTTACGAAAAGTATTTTTATGCTTTTGCTTTTATTTTGTCTGATATTTTTGTTATGGTTATGGGCTCATATTCGTTATGTACCAGTATAATAATATTAGTTATTTGTTAATCCCACTAATAAAGTTCTAATTTTATTAATTCGATTCTAATTTTCGAATTTTTTAGTTTTTTTAATATAAAATAAAAGAAAAGAGAAAGTTGTAATTTTATGCCTCTTAGATCTTCATTTCTATTTTAAATGGTGGAAATTGAAACCCTTTTATTAAAAATTTTATTAAATACAAATAAAAAAAATTTTAAATCTTGGAGGAAGGGGGGGCGGATGTGGCCAAGTGGGTCATGGCGGTGGATTGTGAATCCCCCATGCCCGAGAAGTTCAATTCCCGTGCATGCATGAGCTGGTATGGAACCTACTAAGTGATAACTTTCAAATTCAGAGAAACCCTGGAATCAAAAATGGGCAATCCTGAGCCAAATCCTGTTTTACAAGAACAAACAAGGGTTCAGAAAGCGAAAAAAAAAAAAGGGGGATAGGTGCAAAAACTCAACGGAAGCTGTTCTAAAAAAGGGGGTTGACTGCCTTTTTTGGTAAAAAAAGGAAAAAAAATCCTTCTATCGAATATCGAAACTCCATAAAGGATGAAGGATAAGCGTATATACACTATGTATACACAATGAAAAACTATCTCAAAAATGACAACCGAATCCGTATTTTTTTTTATGAAAAAAAAAAAAATTGTTATGAATCAATTCCAAGTTGAAAAAAAAATCGAATATTCTTTGATCAAATCATTCCCTCCATAGTCTGATCGATCTTTTCTTTTGAAAAACTGATTAATCGGACAAAAATAAAAATAGAGTCCCATTCTACATGTCAATATCAATACCGGCAACAATGAAATTTAAAGTAAAAGGAAAATCCGTCAACTTTAAAAATCGGGAGGGTTCAAGTCCTTCTTTTCCCCAA
>DC03
TAGTCACTGACTGCTGCTATTGAGCCCCATCTACAAATGGATAATTCTGTCTTAGTAGAGACGAGTTTTTGAAAATAACGGAGAAATACCGACTCTCTTGCAAGAGAGTCGGTATTTCTCCGTTATTTTTTATGTTTTTCTTTAATAGTTTTTTATTTCTATCTTTTTTTTACGAAAAGTATTTTTATGCTTTTGCTTTTATTTTGTCTGATATTTTTGTTATGGTTATGGGCTCATATTCGTTATGTACCAGTATAATAATATTAGTTATTTGTTAATCCCACTAATAAAGTTCTAATTTTATTAATTCGATTCTAATTTTCGAATTTTTTAGTTTTTTTAATATAAAATAAAAGAAAAGAGAAAGTTGTAATTTTATGCCTCTTAGATCTTCATTTCTATTTTAAATGGTAGAAATTGAAACCTTTTTATTAAATATTTTATTAAATAGAAATAAAAAAAATTTTAAATCGTGGAGGAAGGGGGGGCGGATGTAGCCAAGTGGATCAAGGCAGTGGATTGTGAATCCCCCATACGCGAGGAGTTGCATTGCATGAGCTTGGTATGGAACCTACTAAGTGATAACTTTCAAATTCAGAGAAACCCTGGAATCAAAAATGGGCAATCCTGAGCCAAATCCTGTTTTACAAGAACAAACAAGGGTTCAGAAAGCGAAAAAAAAAAAAGGGGGATAGGTGCAAAAACTCAACGGAAGCTGTTCTAAAAAATGGGGTTGACTGCCTTTTTTGGTAAAAAAAGGAAAAAAAATCCTTCTATCGAATATCGAAACTCCATAAAGGATGAAGGATAAGCGTATATACACTATGTATACACAATGAAAAACTATCTCAAAAATGACAACCGAATCCGTATTTTTTTTTATGAAAAAAAAAAAAATTGTTATGAATCAATTCCAAGTTGAAAAAAAAATCGAATATTCTTTGATCAAATCATTCACTCCATAGTCTGATCGATCTTTTCTTTTGAAAAACTGATTAATCGGACAAAAATAAAAATAGAGTCCCATTCTACATGTCAATATCAATACCGGCAACAATGAAATTTAAAGTAAAAGGAAAATCCGTCAACTTTAAAAATCGGGAGGGTTCAAGTCCTTCTTTCCCCCAA
>DC04
AATCACTGACTAGCTGCTATTGAGCCCCATCTACAAATGGATAATTCTGTCTTAGTAGAGACGAGTTTTTGAAAATAACGGAGAAATACCGACTCTCTTGCAAGAGAGTCGGTATTTCTCCGTTATTTTTTATGTTTTTCTTTAGTAGTTTTTTATTTCTATCTTTTTTTTACGAAAAGTATTTTTATGCTTTTGCTTTTATTTTGTCTGATATTTTTGTTATGGTTATGGGCTCATATTCGTTATGTACCAGTATAATAATATTAGTTATTTGTTAATCCCACTAATAAAGTTCTAATTTTATTAATTCGATTCTAATTTTCGAATTTTTTAGTTTTTTTAATATAAAATAAAAGAAAAGAGAAAGTTGTAATTTTATGCCTCTTAGATCTTCATTTCTATTTTAAATGGTAGAAATTGAAACCTTTTTATTAAATATTTTATTAAATAGAAATAAAAAAAATTTTAAATCGTGGAGGAAGGGGGGGCGGATGTAGCCAAGTGGATCAAGGCAGTGGATTGTGAATCCCCCAACCCGCGAGAGGCATGCTGAGCTGGTATGGAACCTACTAAGTGATAACTTTCAAATTCAGAGAAACCCTGGAATCAAAAATGGGCAATCCTGAGCCAAATCCTGTTTTACAAGAACAAACAAGGGTTCAGAAAGCGAAAAAAAAAAAAGGGGGATAGGTGCAAAAACTCAACGGAAGCTGTTCTAAAAAATGGGGTTGACTGCCTTTTTTGGTAAAAAAAGGAAAAAAAATCCTTCTATCGAATATCGAAACTCCATAAAGGATGAAGGATAAGCGTATATACCCTATGTATACACAATGAAAAACTATCTCAAAAATGACAACCGAATCCGTATTTTTTTTTATGAAAAAAAAAAAAATTGTTATGAATCAATTCCAAGTTGAAAAAAAAATCGAATATTCTTTGATCAAATCATTCCCTCCATAGTCTGATCGATCTTTTCTTTTGAAAAACTGATTAATCGGACAAAAATAAAAATAGAGTCCCATTCTACATGTCAATATCAATACCGGCAACAATGAAATTTAAAGTAAAAGGAAAATCCGTCAACTTTAAAAATCGGGAGGGTTCAAGTCCTTTTTATCCCCAAAA
>DC05
ACCTTCGCTGACTAGCTGCTATTGAGCCCCATCTACAAATGGATAATTCTGTCTTAGTAGAGACGAGTTTTTGAAAATAACGGAGAAATACCGACTCTCTTGCAAGAGAGTCGGTATTTCTCCGTTATTTTTTATGTTTTTCTTCAGTAGTTTTTTATTTCTATCTTTTTTTTACGAAAAGTATTTTTATGCTTTTGCTTTTATTTTGTCTGATATTTTTGTTATGGTTATGGGCTCATATTCGTTATGTACCAGTATAATAATATTAGTTATTTGTTAATCCCACTAATAAAGTTCTAATTTTATTAATTCGATTCTAATTTTCGAATTTTTTAGTTTTTTTAATATAAAATAAAAGAAAAGAGAAAGTTGTAATTTTATGCCTCTTAGAAATTCCGACTCTCTTGCGTGGAGTCGGTTTTTCCCCTTTTTTTTCAAAAACTCGTCTCTACAAATACAGAATTATCCATTTGTAGATGGGGCTTCAGGGCCGATTAGGCCTAGTGGGAAGTTGTGATCATTTGTTTCATGCATAAACGGCGCCGAGTTCAATTCTCATGGATGAGCTTGGTATGGAACCTACTAAGTGATAACTTTCAAATTCAGAGAAACCCTGGAATCAAAAATGGGCAATCCTGAGCCAAATCCTGTTTTACAAGAACAAACAAGGGTTCAGAAAGCGAAAAAAAAAAAAGGGGGATAGGTGCAAAAACTCAACGGAAGCTGTTCTAAAAAATGGGGTTGACTGCCTTTTTTGGTAAAAAAAGGAAAAAAAATCCTTCTATCGAATATCGAAACTCCATAAAGGATGAAGGATAAGCGTATATACACTATGTATACACAATGAAAAACTATCTCAAAAATGACAACCGAATCCGTATTTTTTTTTATGAAAAAAAAAAAAATTGTTATGAATCAATTCCAAGTTGAAAAAAAAATCGAATATTCTTTGATCAAATCATTCCCTCCATAGTCTGATCGATCTTTTCTTTTGAAAAACTGATTAATCGGACAAAAATAAAAATAGAGTCCCATTCTACATGTCAATATCAATACCGGCAACAATGAAATTTAAAGTAAGAGGAAAATCCGTCAACTTTAAAAATCGTGAGGGTTCAAGTCCCCCTTTTCCCCA
>DC06
CATCTGACTAGCTGCTATTGAGCCCCATCTACAAATGGATAATTCTGTCTTAGTAGAGACGAGTTTTTGAAAATAACGGAGAAATACCGACTCTCTTGCAAGAGAGTCGGTATTTCTCCGTTATTTTTTATGTTTTTCTTTAGTAGTTTTTTATTTCTATCTTTTTTTTACGAGCAGTATTTTTATGCTTTTGCTTTTATTTTGTCTGATATTTTTGTTATGGTTATGGGCTCATATTCGTTATGTACCAGTATAATAATATTAGTTATTTGTTAATCCCACTAATAAAGTTCTAATTTTATTAATTCGATTCTAATTTTCGAATTTTTTAGTTTTTTTAATATAAAATAAAAGAAAAGAGAAAGTTGTAATTTTATGCCTCTTAAATCTTCATTTCTATTTTAAATGGTAGAAATTGAAACCTTTTTATTAAATATTTTATTAAATACAAATAAAAAAAATTTTAAATCTTGGAGGAAGGGGGGGCGGATGTAGCCAAGTGGATCAAGGCAGTGGATTGTGAATCCCCCATGCGCGACAACGCATGGCATGAGCTGGTATGGAACCTACTAAGTGATAACTTTCAAATTCAGAGAAACCCTGGAATCAAAAATGGGCAATCCTGAGCCAAATCCTGTTTTACAAGAACAAACAAGGGTTCAGAAAGCGAAAAAAAAAAAAGGGGGATAGGTGCAAAAACTCAACGGAAGCTGTTCTAAAAAATGGGGTTGACTGCCTTTTTTGGTAAAAAAAGGAAAAAAAATCCTTCTATCGAATATCGAAACTCCATAAAGGATGAAGGATAAGCGTATATACACTATGTATACACAATGAAAAACTATCTCAAAAATGACAACCGAATCCGTATTTTTTTTTATGAAAAAAAAAAAAATTGTTATGAATCAATTCCAAGTTGAAAAAAAAATCGAATATTCTTTGATCAAATCATTCCCTCCATAGTCTGATCGATCTTTTCTTTTGAAAAACTGATTAATCGGACAAAAATAAAAATAGAGTCCCATTCTACATGTCAATATCAATACCGGCAACAATGAAATTTAAAGTAAAAGGAAAATCCGTCAACTTTAAAAATCGGGAGGGTTCAAGTCCCCTTTTCCCCAAA
>DC07
AATTCTCTGACTAGCTGCTATTGAGCCCCATCTACAAATGGATAATTCTGTCTTAGTAGAGACGAGTTTTTGAAAATAACGGAGAAATACCGACTCTCTTGCAAGAGAGTCGGTATTTCTCCGTTATTTTTTATGTTTTTCTTTAATAGTTTTTTATTTCTATCTTTTTTTTACGAAAAGTATTTTTATGCTTTTGCTTTTATTTTGTCTGATATTTTTGTTATGGTTATGGGCTCATATTCGTTATGTACCAGTATAATAATATTAGTTATTTGTTAATCCCACTAATAAAGTTCTAATTTTATTAATTCGATTCTAATTTTCGAATTTTTTAGTTTTTTTAATATAAAATAAAAGAAAAGAGAAAGTTGTAATTTTATGCCTCTTAGATCTTCATTTCTATTTTAAATGGTAGAAATTGAAACCTTTTTATTAAATATTTTATTAAATAGAAATAAAAAAAATTTTAAATCGTGGAGGAAGGGGGGGCGGATGTAGCCAAGTGGATCAAGGCAGTGGATTGTGAATCCACCATGCGCGAGGAGCTTTCATGCTGAGCTTGGTATGGAACCTACTAAGTGATAACTTTCAAATTCAGAGAAACCCTGGAATCAAAAATGGGCAATCCTGAGCCAAATCCTGTTTTACAAGAACAAACAAGGGTTCAGAAAGCGAAAAAAAAAAAAGGGGGATAGGTGCAAAAACTCAACGGAAGCTGTTCTAAAAAATGGGGTTGACTGCCTTTTTTGGTAAAAAAAGGAAAAAAAATCCTTCTATCGAATATCGAAACTCCATAAAGGATGAAGGATAAGCGTATATACCCTATGTATACACAATGAAAAACTATCTCAAAAATGACAACCGAATCCGTATTTTTTTTTATGAAAAAAAAAAAAATTGTTATGAATCAATTCCAAGTTGAAAAAAAAATCGAATATTCTTTGATCAAATCATTCCCTCCATAGTCTGATCGATCTTTTCTTTTGAAAAACTGATTAATCGGACAAAAATAAAAATAGAGTCCCATTCTACATGTCAATATCAATACCGGCAACAATGAAATTTAAAGTAAAAGGAAAATCCGTCAACTTTAAAAATCGGGAGGGTTCAAGTCCTTTTTTTCCCCA
>DC08
AATTCACTGACTAGCTGCTATTGAGCCCCATCTACAAATGGATAATTCTGTCTTAGTAGAGACGAGTTTTTGAAAATAACGGAGAAATACCGACTCTCTTGCAAGAGAGTCGGTATTTCTCCGTTATTTTTTATGTTTTTCTTTAACAGTTTTTTATTTCTATCTTTTTTTTACGGGCAGTATTTTTATGCTTTTGCTTTTATTTTGTCTGATATTTTTGTTATGGTTATGGGCTCATATTCGTTATGTACCAGTATAATAATATTAGTTATTTGTTAATCCCACTAATAAAGTTCTAATTTTATTAATTCGATTCTAATTTTCGAATTTTTTAGTTTTTTTAATATAAAATAAAAGAAAAGAGAAAGTTGTAATTTTATGCCTCTTAGATCTTCATTTCTATTTTAAATGGTAGAAATTGAAACCCTTTTTTTAAAAAATTTATTCAATAGAAATAAAAAAAATTTTAAATCGTGGAGGAAGGGGGGGCGGATGTAGCCAAGTGGAACATGGCAATGGATTGTTAATCCCCCAACCGCGACGAGGCATGGCTGAGCTGGTATGGAACCTACTAAGTGATAACTTTCAAATTCAGAGAAACCCTGGAATCAAAAATGGGCAATCCTGAGCCAAATCCTGTTTTACAAGAACAAACAAGGGTTCAGAAAGCGAAAAAAAAAAAAGGGGGATAGGTGCAAAAACTCAACGGAAGCTGTTCTAAAAAATGGGGTTGACTGCCTTTTTTGGTAAAAAAAGGAAAAAAAATCCTTCTATCGAATATCGAAACTCCATAAAGGATGAAGGATAAGCGTATATACCCTATGTATACACAATGAAAAACTATCTCAAAAATGACAACCGAATCCGTATTTTTTTTTATGAAAAAAAAAAAAATTGTTATGAATCAATTCCAAGTTGAAAAAAAAATCGAATATTCTTTGATCAAATCATTCCCTCCATAGTCTGATCGATCTTTTCTTTTGAAAAACTGATTAATCGGACAAAAATAAAAATAGAGTCCCATTCTACATGTCAATATCAATACCGGCAACAATGAAATTTAAAGTAAAAGGAAAATCCGTCAACTTTAAAAATCGGGAGGGTTCAAGTCCTCCTTTCCCCCAA
>DC09
GATTCACTGACTGCTGCTATTGAGCCCCATCTACAAATGGATAATTCTGTCTTAGTAGAGACGAGTTTTTGAAAATAACGGAGAAATACCGACTCTCTTGCAAGAGAGTCGGTATTTCTCCGTTATTTTTTATGTTTTTCCTTAGTAGTTTTTTATTTCTATCTTTTTTTTGGGGCAGTATTTTTATGCTTTTGCTTTTATTTTGTCTGATATTTTTGTTATGGTTAAGGGCTCATATTCGTTATGTACCAGTATAATAATATTAGTTATTTGTTAATCCCACTAATAAAGTTCTAATTTTATTAATTCGATTCTAATTTTCGAATTTTTTAGTTTTTTTAATATAAAATAAAAGAAAAGAGAAAGTTGTAATTTTATGCCTCTTAGATCTTCATTTCTATTTTAAATGGTAGAAATTGAAACCTTTTTATTAAATATTTTATTAAATAGAAATAAAAAAAATTTTAAATCGTGGAGGAAGGGGGGGCGGATGTAGCCAAGTGGATCAAGGCAGTGGATTGTGAATCCACCAAGCGCGAGAGTTCACCATGCTGAGCTGGTATGGACCTACTAAGTGATAACTTTCAAATTCAGAGAAACCCTGGAATCAAAAATGGGCAATCCTGAGCCAAATCCTGTTTTACAAGAACAAACAAGGGTTCAGAAAGCGAAAAAAAAAAAAGGGGGATAGGTGCAAAAACTCAACGGAAGCTGTTCTAAAAAATGGGGTTGACTGCCTTTTTTGGTAAAAAAAGGAAAAAAAATCCTTCTATCGAATATCGAAACTCCATAAAGGATGAAGGATAAGCGTATATACACTATGTATACACAATGAAAAACTATCTCAAAAATGACAACCGAATCCGTATTTTTTTTTATGAAAAAAAAAAAAATTGTTATGAATCAATTCCAAGTTGAAAAAAAAATCGAATATTCATTGATCAAATCATTCACTCCATAGTCTGATCGATCTTTTCTTTTGAAAAACTGATTAATCGGACAAAAATAAAAATAGAGTCCCATTCTACATGTCAATATCAATACCGGCAACAATGAAATTTAAAGTAAAAGGAAAATCCGTCAACTTTAAAAATCGGGAGGGTTCAAGTCCTCTTTTCCCCAAAA
>DC10
ATCTTGACTAGACTGCTATTGAGCCCCATCTACAAATGGATAATTCTGTCTTAGTAGAGACGAGTTTTTGAAAATAACGGAGAAATACCGACTCTCTTGCAAGAGAGTCGGTATTTCTCAGTTATTTTTTATGTTTTTCTTTAGTAGTTTTTTATTTCTATCTTTTTTTTACGAAAAGTATTTTTATGCTTTTGCTTTTATTTTGTCTGATATTTTTGTTATGGTTATGGGCTCATATTCGTTATGTACCAGTATAATAATATTAGTTATTTGTTAATCCCACTAATAAAGTTCTAATTTTATTAATTCGATTCTAATTTTCGAATTTTTTAGTTTTTTTAATATAAAATAAAAGAAAAGAGAAAGTTGTAATTTTATGCCTCTTAGATCTTCATTTCTATTTTAAATGGTAGAAATTGAAACCTTTTTATTAAATATTTTATTAAATAGAAATAAAAAAAATTTTAAATCGTGGAGGAAGGGGGGGCGGATGTAGCCAAGTGGATCAAGGCAGTGGATTGTGAATCCACCATGCGCGACGAGTTCGGCATGCATGAGCTTGGTATGGAACCTACTAAGTGATAACTTTCAAATTCAGAGAAACCCTGGAATCAAAAATGGGCAATCCTGAGCCAAATCCTGTTTTACAAGAACAAACAAGGGTTCAGAAAGCGAAAAAAAAAAAAGGGGGATAGGTGCAAAAACTCAACGGAAGCTGTTCTAAAAAATGGGGTTGACTGCCTTTTTTGGTAAAAAAAGGAAAAAAAATCCTTCTATCGAATATCGAAACTCCATAAAGGATGAAGGATAAGCGTATATACACTATGTATACACAATGAAAAACTATCTCAAAAATGACAACCGAATCCGTATTTTTTTTTATGAAAAAAAAAAAAATTGTTATGAATCAATTCCAAGTTGAAAAAAAAATCGAATATTCTTTGATCAAATCATTCCCTCCATAGTCTGATCGATCTTTTCTTTTGAAAAACTGATTAATCGGACAAAAATAAAAATAGAGTCCCATTCTACATGTCAATATCAATACCGGCAACAATGAAATTTAAAGTAAGAGGAAAATCCGTCGACTTTAAAAATCGGGAGGGTTCAAGTCCCTCTTATCCCCAA
>DC11
AGTCATCTGACTAGCTGCTATTGAGCCCCATCTACAAATGGATAATTCTGTCTTAGTAGAGACGAGTTTTTGAAAATAACGGAGAAATACCGACTCTCTTGCAAGAGAGTCGGTATTTCTCCGTTATTTTTTATGTTTTTCTTTAATAGTTTTTTATTTCTATCTTTTTTTTACGAAAAGTATTTTTATGCTTTTGCTTTTATTTTGTCTGATATTTTTGTTATGGTTATGAGCTCATATTCGTTATGTACCAGTATAATAATATTAGTTATTTGTTAATCCCACTAATAAAGTTCTAATTTTATTAATTCGATTCTAATTTTCGAATTTTTTAGTTTTTTTAATATAAAATAAAAGAAAAGAGAAAGTTGTAATTTTATGCCTCTTAGATCTTCATTTCTATTTTAAATGGTAGAAATTGAAACCTTTTTATTAAATATTTTATTAAATACAAATAAAAAAAATTTTAAATCTTGGAGGAAGGGGGGGCGGATGTAGCCAAGTGGATCAAGGCAGTGGATTGTGAATCCCCCATGCGCGAGGAGTTCGGCATGCATGAGCTTGGTATGGAACCTACTAAGTGATAACTTTCAAATTCAGAGAAACCCTGGAATCAAAAATGGGCAATCCTGAGCCAAATCCTGTTTTACAAGAACAAACAAGGGTTCAGAAAGCGAAAAAAAAAAAAGGGGGATAGGTGCAAAAACTCAACGGAAGCTGTTCTAAAAAATGGGGTTGACTGCCTTTTTTGGTAAAAAAAGGAAAAAAAATCCTTCTATCGAATATCGAAACTCCATAAAGGATGAAGGATAAGCGTATATACCCTATGTATACACAATGAAAAACTATCTCAAAAATGACAACCGAATCCGTATTTTTTTTTATGAAAAAAAAAAAAATTGTTATGAATCAATTCCAAGTTGAAAAAAAAATCAAATATTCTTTGATCAAATCATTCCCTCCATAGTCTGATCGATCTTTTCTTTTGAAAAACTGATTAATCGGACAAAAATAAAAATAGAGTCCCATTCTACATGTCAATATCAATACCGGCAACAATGAAATTTAAAGTAAAAGGAAAATCCGTCAACTTTAAAAATCGGGAGGGTTCAAGTCCCTCCTATCCCAAA
>DC12
AATCACTGACTAGCTGCTATTGAGCCCCATCTACAAATGGATAATTCTGTCTTAGTAGAGACGAGTTTTTGAAAATAACGGAGAAATACCGACTCTCTTGCAAGAGAGTCGGTATTTCTCCGTTATTTTTTATGTTTTTCTTTAATAGTTTTTTATTTCTATCTTTTTTTTACGAAAAGTATTTTTATGCTTTTGCTTTTATTTTGTCTGATATTTTTGTTATGGTTATGGGCTCATATTCGTTATGTACCAGTATAATAATATTAGTTATTTGTTAATCCCACTAATAAAGTTCTAATTTTATTAATTCGATTCTAATTTTCGAATTTTTTAGTTTTTTTAATATAAAATAAAAGAAAAGAGAAAGTTGTAATTTTATGCCTCTTAAATCTTCATTTCTATTTTAAATGGTAGAAATTGAAACCTTTTTATTAAAAATTTTATTAAATAGAAATAAAAAAAATTTTAAATCTTGGAGGAAGGGGGGGCGGATGTAGCCAAGTGGATCAAGGCAGTGGATTGTGAATCCCCCAAGCACGAGAAGCTCGTGCATGCATGAGCTTGGTATGGAACCTACTAAGTGATAACTTTCAAATTCAGAGAAACCCTGGAATCAAAAATGGGCAATCCTGAGCCAAATCCTGTTTTACAAGAACAAACAAGGGTTCAGAAAGCGAAAAAAAAAAAAGGGGGATAGGTGCAAAAACTCAACGGAAGCTGTTCTAAAAAATGGGGTTGACTGCCTTTTTTGGTAAAAAAAGGAAAAAAAATCCTTCTATCGAATATCGAAACTCCATAAAGGATGAAGGATAAGCGTATATACCCTATGTATACACAATGAAAAACTATCTCAAAAATGACAACCGAATCCGTATTTTTTTTTATGAAAAAAAAAAAAATTGTTATGAATCAATTCCAAGTTGAAAAAAAAATCGAATATTCTTTGATCAAATCATTCCCTCCATAGTCTGATCGATCTTTTCTTTTGAAAAACTGATTAATCGGACAAAAATAAAAATAGAGTCCCATTCTACATGTCAATATCAATACCGGCAACAATGAAATTTAAAGTAAAAGGAAAATCCGTCAACTTTAAAAATCGGGAGGGTTCAAGTCCCCCCTATCCCCAA
>DC13
AATCACTGACTAGCTGCTATTGAGCCCCATCTACAAATGGATAATTCTGTCTTAGTAGAGACGAGTTTTTGAAAATAACGGAGAAATACCGACTCTCTTGCAAGAGAGTCGGTATTTCTCCGTTATTTTTTATGTTTTTCTTTAGTAGTTTTTTATTTCTATCTTTTTTTTACGGGAAGTATTTTTATGCTTTTGCTTTTATTTTGTCTGATATTTTTGTTATGGTTAAGGGCTCATATTCGTTATGTACCAGTATAATAATATTAGTTATTTGTTAATCCCCCTAATAAAGTTCTAATTTTATTAATTCGATTCTAATTTTCGAATTTTTTAGTTTTTTTAATATAAAATAAAAAAAAAGAGAAAGTTGTAATTTTATGCCCCTTAAATCTTCATTTCTATTTTAAATGGGGTAAATTGAAACCCTTTTATTAAAAATTTTATTAAATACAAATAAAAAAAATTTTAAATCTTGGAGGAAGGGGGGGCGGATGTGGCCAAGTGGAAAATGGGAGTGGATTGTGAATCCCCCACGCGCGAGAAAATCTGCATGCATGAGCTTGGTATGGAACCTACTAAGTGATAACTTTCAAATTCAGAGAAACCCTGGAATCAAAAATGGGCAATCCTGAGCCAAATCCTGTTTTACAAGAACAAACAAGGGTTCAGAAAGCGAAAAAAAAAAAAGGGGGATAGGTGCAAAAACTCAACGGAAGCTGTTCTAAAAAATGGGGTTGACTGCCTTTTTTGGTAAAAAAAGGAAAAAAAATCCTTCTATCGAATATCGAAACTCCATAAAGGATGAAGGATAAGCGTATATACACTATGTATACACAATGAAAAACTATCTCAAAAATGACAACCGAATCCGTATTTTTTTTTATGAAAAAAAAAAAAATTGTTATGAATCAATTCCAAGTTGAAAAAAAAATCGAATATTCTTTGATCAAATCATTCCCTCCATAGTCTGATCGATCTTTTCTTTTGAAAAACTGATTAATCGGACAAAAATAAAAATAGAGTCCCATTCTACATGTCAATATCAATACCGGCAACAATGAAATTTAAAGTAAAAGGAAAATCCGTCAACTTTAAAAATCGTGAGGGTTCAAGTCCCCCTTTCCCCAAA
>DC14
AATCTCTGACTAGCTGCTATTGAGCCCCATCTACAAATGGATAATTCTGTCTTAGTAGAGACGAGTTTTTGAAAATAACGGAGAAATACCGACTCTCTTGCAAGAGAGTCGGTATTTCTCCGTTATTTTTTATGTTTTTCTTTAATAGTTTTTTATTTCTATCTTTTTTTTACGAAAAGTATTTTTATGCTTTTGCTTTTATTTTGTCTGATATTTTTGTTATGGTTATGGGCTCATATTCGTTATGTACCAGTATAATAATATTAGTTATTTGTTAATCCCACTAATAAAGTTCTAATTTTATTAATTCGATTCTAATTTTCGAATTTTTTAGTTTTTTTAATATAAAATAAAAGAAAAGAGAAAGTTGTAATTTTATGCCTCTTAGATCTTCATTTCTATTTTAAATGGTAGAAATTGAAACCTTTTTATTAAATATTTTATTAAATACAAATAAAAAAAATTTTAAATCGTGGAGGAAGGGGGGGCGGATGTAGCCAAGTGGATCATGGCAGTGGATTGTGAATCCCCCAAACCCGAAGAGTTGAGCATGATGAGCTTGGTATGGAACCTACTAAGTGATAACTTTCAAATTCAGAGAAACCCTGGAATCAAAAATGGGCAATCCTGAGCCAAATCCTGTTTTACAAGAACAAACAAGGGTTCAGAAAGCGAAAAAAAAAAAAGGGGGATAGGTGCAAAAACTCAACGGAAGCTGTTCTAAAAAATGGGGTTGACTGCCTTTTTTGGTAAAAAAAGGAAAAAAAATCCTTCTATCGAATATCGAAACTCCATAAAGGATGAAGGATAAGCGTATATACACTATGTATACACAATGAAAAACTATCTCAAAAATGACAACCGAATCCGTATTTTTTTTTATGAAAAAAAAAAAAATTGTTATGAATCAATTCCAAGTTGAAAAAAAAATCGAATATTCTTTGATCAAATCATTCCCTCCATAGTCTGATCGATCTTTTCTTTTGAAAAACTGATTAATCGGACAAAAATAAAAATAGAGTCCCATTCTACATGTCAATATCAATACCGGCAACAATGAAATTTAAAGTAAAAGGAAAATCCGTCAACTTTAAAAATCGGGAGGGTTCAAGTCTCCCTTTCCCCACAA
>DC15
AATCTCTGACTAGCTGCTATTGAGCCCCATCTACAAATGGATAATTCTGTCTTAGTAGAGACGAGTTTTTGAAAATAACGGAGAAATACCGACTCTCTTGCAAGAGAGTCGGTATTTCTCCGTTATTTTTTATGTTTTTCTTTAATAGTTTTTTATTTCTATCTTTTTTTTACGAAAAGTATTTTTATGCTTTTGCTTTTATTTTGTCTGATATTTTTGTTATGGTTATGGGCTCATATTCGTTATGTACCAGTATAATAATATTAGTTATTTGTTAATCCCACTAATAAAGTTCTAATTTTATTAATTCGATTCTAATTTTCGAATTTTTTAGTTTTTTTAATATAAAATAAAAGAAAAGAGAAAGTTGTAATTTTATGCCTCTTAAATCTTCATTTCTATTTTAAATGGTAGAAATTGAAACCTTTTTATTAAATATTTTATTAAATACAAATAAAAAAAATTTTAAATCTTGGAGGAAGGGGGGGCGGATGTAGCCAAGTGGATCAAGGCAGTGGATTGTGAATCCCCCAAACCCGAAAAGATCCCCATGCATGAGCTGGTATGGAACCTACTAAGTGATAACTTTCAAATTCAGAGAAACCCTGGAATCAAAAATGGGCAATCCTGAGCCAAATCCTGTTTTACAAGAACAAACAAGGGTTCAGAAAGCGAAAAAAAAAAAAGGGGGATAGGTGCAAAAACTCAACGGAAGCTGTTCTAAAAAATGGGGTTGACTGCCTTTTTTGGTAAAAAAAGGAAAAAAAATCCTTCTATCGAATATCGAAACTCCATAAAGGATGAAGGATAAGCGTATATACCCTATGTATACACAATGAAAAACTATCTCAAAAATGACAACCGAATCCGTATTTTTTTTTATGAAAAAAAAAAAAATTGTTATGAATCAATTCCAAGTTGAAAAAAAAATCGAATATTCTTTGATCAAATCATTCCCTCCATAGTCTGATCGATCTTTTCTTTTGAAAAACTGATTAATCGGACAAAAATAAAAATAGAGTCCCATTCTACATGTCAATATCAATACCGGCAACAATGAAATTTAAAGTAAAAGGAAAATCCGTCAACTTTAAAAATCGGGAGGGTTCAAGTCCTCTTTTCCCCAAA
>DC16
AATCTCTGACTAGCTGCTATTGAGCCCCATCTACAAATGGATAATTCTGTCTTAGTAGAGACGAGTTTTTGAAAATAACGGAGAAATACCGACTCTCTTGCAAGAGAGTCGGTATTTCTCCGTTATTTTTTATGTTTTTCTTTAATAGTTTTTTATTTCTATCTTTTTTTTACGGGAAGTATTTTTATGCTTTTGCTTTTATTTTGTCTGATATTTTTGTTATGGTTAAGGGCTCATATTCGTTATGTACCAGTATAATAATATTAGTTATTTGTTAATCCCACTAATAAAGTTCTAATTTTATTAATTCGATTCTAATTTTCGAATTTTTTAGTTTTTTTAATATAAAATAAAAGAAAAGAGAAAGTTGTAATTTTATGCCTCTTAAATCTTCATTTCTATTTTAAATGGTAGAAATTGAAACCCTTTTATTAAAAATTTTATTAAATAGAAATAAAAAAAATTTTAAATCGTGGAGGAAGGGGGGGCGGATGTAGCCAAGTGGATCAAGGCAGTGGATTGTGAATCCCCCAAGCCCGAAGAAAGGATGCATGAGCTTGGTATGGAACCTACTAAGTGATAACTTTCAAATTCAGAGAAACCCTGGAATCAAAAATGGGCAATCCTGAGCCAAATCCTGTTTTACAAGAACAAACAAGGGTTCAGAAAGCGAAAAAAAAAAAAGGGGGATAGGTGCAAAAACTCAACGGAAGCTGTTCTAAAAAATGGGGTTGACTGCCTTTTTTGGTAAAAAAAGGAAAAAAAATCCTTCTATCGAATATCGAAACTCCATAAAGGATGAAGGATAAGCGTATATACACTATGTATACACAATGAAAAACTATCTCAAAAATGACAACCGAATCCGTATTTTTTTTTATGAAAAAAAAAAAAATTGTTATGAATCAATTCCAAGTTGAAAAAAAAATCGAATATTCATTGATCAAATCATTCCCTCCATAGTCTGATCGATCTTTTCTTTTGAAAAACTGATTAATCGGACAAAAATAAAAATAGAGTCCCATTCTACATGTCAATATCAATACCGGCAACAATGAAATTTAAAGTAAAAGGAAAATCCGTCAACTTTAAAAATCGGGAGGGTTCAAGTCCTTCTTTCCCCCAA
>DC17
AATCACTGACTGCTGCTATTGAGCCCCATCTACAAATGGATAATTCTGTCTTAGTAGAGACGAGTTTTTGAAAATAACGGAGAAATACCGACTCTCTTGCAAGAGAGTCGGTATTTCTCCGTTATTTTTTATGTTTTTCTTTAGTAGTTTTTTATTTCTATCTTTTTTTTACGAAAAGTATTTTTATGCTTTTGCTTTTATTTTGTCTGATATTTTTGTTATGGTTATGGGCTCATATTCGTTATGTACCAGTATAATAATATTAGTTATTTGTTAATCCCACTAATAAAGTTCTAATTTTATTAATTCGATTCTAATTTTCGAATTTTTTAGTTTTTTTAATATAAAATAAAAGAAAAGAGAAAGTTGTAATTTTATGCCTCTTAGATCTTCATTTCTATTTTAAATGGTAGAAATTGAAACCTTTTTATTAAATATTTTATTAAATAGAAATAAAAAAAATTTTAAATCGTGGAGGAAGGGGGGGCGGATGTAGCCAAGTGGATCAAGGCAGTGGATTGTGAATCCACCATGCGCGACGAGTTGTGCATGCATGAGCTTGGTATGGAACCTACTAAGTGATAACTTTCAAATTCAGAGAAACCCTGGAATCAAAAATGGGCAATCCTGAGCCAAATCCTGTTTTACAAGAACAAACAAGGGTTCAGAAAGCGAAAAAAAAAAAAGGGGGATAGGTGCAAAAACTCAACGGAAGCTGTTCTAAAAAATGGGGTTGACTGCCTTTTTTGGTAAAAAAAGGAAAAAAAATCCTTCTATCGAATATCGAAACTCCATAAAGGATGAAGGATAAGCGTATATACACTATGTATACACAATGAAAAACTATCTCAAAAATGACAACCGAATCCGTATTTTTTTTTATGAAAAAAAAAAAAATTGTTATGAATCAATTCCAAGTTGAAAAAAGAATCGAATATTCATTGATCAAATCATTCACTCCATAGTCTGATCGATCTTTTCTTTTGAAAAACTGATTAATCGGACAAAAATAAAAATAGAGTCCCATTCTACATGTCAATATCAATACCGGCAACAATGAAATTTAAAGTAAGAGGAAAATCCGTCGACTTTAAAAATCGGGAGGGTTCAAGTCCTCTTTCCCCAA
>DC18
ATTCTTGACTAGCTGCTATTGAGCCCCATCTACAAATGGATAATTCTGTCTTAGTAGAGACGAGTTTTTGAAAATAACGGAGAAATACCGACTCTCTTGCAAGAGAGTCGGTATTTCTCCGTTATTTTTTATGTTTTTCTTTAGTAGTTTTTTATTTCTATCTTTTTTTTACGAAAAGTATTTTTATGCTTTTGCTTTTATTTTGTCTGATATTTTTGTTATGGTTATGGGCTCATATTCGTTATGTACCAGTATAATAATATTAGTTATTTGTTAATCCCACTAATAAAGTTCTAATTTTATTAATTCGATTCTAATTTTCGAATTTTTTAGTTTTTTTAATATAAAATAAAAGAAAAGAGAAAGTTGTAATTTTATGCCTCTTAGATCTTCATTTCTATTTTAAATGGTAGAAATTGAAACCTTTTTATTAAATATTTTATTAAATAGAAATAAAAAAAATTTTAAATCGTGGAGGAAGGGGGGGCGGATGTAGCCAAGTGGATCAAGGCAGTGGATTGTGAATCCACCAAGCGCGACGAGTTCGGGATGCATGAGCTTGGTATGGAACCTACTAAGTGATAACTTTCAAATTCAGAGAAACCCTGGAATCAAAAATGGGCAATCCTGAGCCAAATCCTGTTTTACAAGAACAAACAAGGGTTCAGAAAGCGAAAAAAAAAAAAGGGGGATAGGTGCAAAAACTCAACGGAAGCTGTTCTAAAAAATGGGGTTGACTGCCTTTTTTGGTAAAAAAAGGAAAAAAAATCCTTCTATCGAATATCGAAACTCCATAAAGGATGAAGGATAAGCGTATATACACTATGTATACACAATGAAAAACTATCTCAAAAATGACAACCGAATCCGTATTTTTTTTTATGAAAAAAAAAAAAATTGTTATGAATCAATTCCAAGTTGAAAAAAAAATCGAATATTCTTTGATCAAATCATTCCCTCCATAGTCTGATCGATCTTTTCTTTTGAAAAACTGATTAATCGGACAAAAATAAAAATAGAGTCCCATTCTACATGTCAATATCAATACCGGCAACAATGAAATTTAAAGTAAAAGGAAAATCCGTCAACTTTAAAAATCGGGAGGGTTCAAGTCCTCCTTACCCCCA
>DC19
TCTGTGACTAGCTGCTATTGAGCCCCATCTACAAATGGATAATTCTGTCTTAGTAGAGACGAGTTTTTGAAAATAACGGAGAAATACCGACTCTCTTGCAAGAGAGTCGGTATTTCTCCGTTATTTTTTATGTTTTTCTTTAATAGTTTTTTATTTCTATCTTTTTTTTACGAAAAGTATTTTTATGCTTTTGCTTTTATTTTGTCTGATATTTTTGTTATGGTTATGGGCTCATATTCGTTATGTACCAGTATAATAATATTAGTTATTTGTTAATCCCACTAATAAAGTTCTAATTTTATTAATTCGATTCTAATTTTCGAATTTTTTAGTTTTTTTAATATAAAATAAAAGAAAAGAGAAAGTTGTAATTTTATGCCTCTTAAATCTTCATTTCTATTTTAAATGGTAGAAATTGAAACCTTTTTATTAAATATTTTATTAAATAGAAATAAAAAAAATTTTAAATCGTGGAGGAAGGGGGGGCGGATGTAGCCAAGTGGATCAAGGCAGTGGATTGTGAATCCACCATGAGCGAAGAGCGGATGCATGAGCTTGGTATGGAACCTACTAAGTGATAACTTTCAAATTCAGAGAAACCCTGGAATCAAAAATGGGCAATCCTGAGCCAAATCCTGTTTTACAAGAACAAACAAGGGTTCAGAAAGCGAAAAAAAAAAAAGGGGGATAGGGGCAAAAACTCAACGGAAGCTGTTCTAAAAAAGGGGGTTGACTGCCTTTTTTGGTAAAAAAAGGAAAAAAAATCCTTCTATCGAATATCGAAACTCCATAAAGGATGAAGGATAAGCGTATATACACTATGTATACACAATGAAAAACTATCTCAAAAATGACAACCGAATCCGTATTTTTTTTTATGAAAAAAAAAAAAATTGTTATGAATCAATTCCAAGTTGAAAAAAAAATCGAATATTCTTTGATCAAATCATTCCCTCCATAGTCTGATCGATCTTTTCTTTTGAAAAACTGATTAATCGGACAAAAATAAAAATAGAGTCCCATTCTACATGTCAATATCAATACCGGCAACAATGAAATTTAAAGTAAAAGGAAAATCCGTCAACTTTAAAAATCGGGAGGGTTCAAGTCCCCCCTATCCCAAA
>DC20
AGTCATTGACTGCTGCTATTGAGCCCCATCTACAAATGGATAATTCTGTCTTAGTAGAGACGAGTTTTTGAAAATAACGGAGAAATACCGACTCTCTTGCAAGAGAGTCGGTATTTCTCCGTTATTTTTTATGTTTTTCTTTAATAGTTTTTTATTTCTATCTTTTTTTTGGGGCAGTATTTTTATGCTTTTGCTTTTATTTTGTCTGATATTTTTGTTATGGTTATGGGCTCATATTCGTTATGTACCAGTATAATAATATTAGTTATTTGTTAATCCCACTAATAAAGTTCTAATTTTATTAATTCGATTCTAATTTTCGAATTTTTTAGTTTTTTTAATATAAAATAAAAGAAAAGAGAAAGTTGTAATTTTATGCCTCTTAAATCTTCATTTCTATTTTAAATGGTAGAAATTGAAACCTTTTTATTAAATATTTTATTAAATACAAATAAAAAAAATTTTAAATCTTGGAGGAAGGGGGGGCGGATGTAGCCAAGTGGATCAAGGCAGTGGATTGTGAATCCCCCATGAGCGACGACCTCGGCATGCATGAGCTTGGTATGGAACCTACTAAGTGATAACTTTCAAATTCAGAGAAACCCTGGAATCAAAAATGGGCAATCCTGAGCCAAATCCTGTTTTACAAGAACAAACAAGGGTTCAGAAAGCGAAAAAAAAAAAAGGGGGATAGGTGCAAAAACTCAACGGAAGCTGTTCTAAAAAATGGGGTTGACTGCCTTTTTTGGTAAAAAAAGGAAAAAAAATCCTTCTATCGAATATCGAAACTCCATAAAGGATGAAGGATAAGCGTATATACCCTATGTATACACAATGAAAAACTATCTCAAAAATGACAACCGAATCCGTATTTTTTTTTATGAAAAAAAAAAAAATTGTTATGAATCAATTCCAAGTTGAAAAAAAAATCAAATATTCTTTGATCAAATCATTCCCTCCATAGTCTGATCGATCTTTTCTTTTGAAAAACTGATTAATCGGACAAAAATAAAAATAGAGTCCCATTCTACATGTCAATATCAATACCGGCAACAATGAAATTTAAAGTAAAAGGAAAATCCGTCAACTTTAAAAATCGGGAGGGTTCAAGTCTTCCTTTCCCCCAA
>DC21
ATCACTGACTGCTGCTATTGAGCCCCATCTACAAATGGATAATTCTGTCTTAGTAGAGACGAGTTTTTGAAAATAACGGAGAAATACCGACTCTCTTGCAAGAGAGTCGGTATTTCTCCGTTATTTTTTATGTTTTTCTTTAGTAGTTTTTTATTTCTATCTTTTTTTTACGGGCAGTATTTTTATGCTTTTGCTTTTATTTTGTCTGATATTTTTGTTATGGTTATGGGCTCATATTCGTTATGTACCAGTATAATAATATTAGTTATTTGTTAATCCCACTAATAAAGTTCTAATTTTATTAATTCGATTCTAATTTTCGAATTTTTTAGTTTTTTTAATATAAAATAAAAGAAAAGAGAAAGTTGTAATTTTATGCCTCTTAAATCTTCATTTCTATTTTAAATGGTAGAAATTGAAACCTTTTTATTAAATATTTTATTAAATACAAATAAAAAAAATTTTAAATCGTGGAGGAAGGGGGGGCGGATGTAGCCAAGTGGATCATGGCAGTGGATTGTGAATCCACCATGCGCGACAAAGGCATGCATGAGCTTGGTATGGAACCTACTAAGTGATAACTTTCAAATTCAGAGAAACCCTGGAATCAAAAATGGGCAATCCTGAGCCAAATCCTGTTTTACAAGAACAAACAAGGGTTCAGAAAGCGAAAAAAAAAAAAGGGGGATAGGTGCAAAAACTCAACGGAAGCTGTTCTAAAAAATGGGGTTGACTGCCTTTTTTGGTAAAAAAAGGAAAAAAAATCCTTCTATCGAATATCGAAACTCCATAAAGGATGAAGGATAAGCGTATATACCCTATGTATACACAATGAAAAACTATCTCAAAAATGACAACCGAATCCGTATTTTTTTTTATGAAAAAAAAAAAAATTGTTATGAATCAATTCCAAGTTGAAAAAAAAATCGAATATTCTTTGATCAAATCATTCCCTCCATAGTCTGATCGATCTTTTCTTTTGAAAAACTGATTAATCGGACAAAAATAAAAATAGAGTCCCATTCTACATGTCAATATCAATACCGGCAACAATGAAATTTAAAGTAAAAGGAAAATCCGTCAACTTTAAAAATCGTGAGGGTTCAAGTCTTCTTTTCCCCCAA
>DC22
ATCACTGACTAGCTGCTATTGAGCCCCATCTACAAATGGATAATTCTGTCTTAGTAGAGACGAGTTTTTGAAAATAACGGAGAAATACCGACTCTCTTGCAAGAGAGTCGGTATTTCTCAGTTATTTTTTATGTTTTTCTTTAGTAGTTTTTTATTTCTATCTTTTTTTTACGAAAAGTATTTTTATGCTTTTGCTTTTATTTTGTCTGATATTTTTGTTATGGTTATGGGCTCATATTCGTTATGTACCAGTATAATAATATTAGTTATTTGTTAATCCCACTAATAAAGTTCTAATTTTATTAATTCGATTCTAATTTTCGAATTTTTTAGTTTTTTTAATATAAAATAAAAGAAAAGAGAAAGTTGTAATTTTATGCCTCTTAGATCTTCATTTCTATTTTAAATGGTAGAAATTGAAACCTTTTTATTAAATATTTTATTAAATACAAATAAAAAAAATTTTAAATCGTGGAGGAAGGGGGGGCGGATGTAGCCAAGTGGATCAAGGCAGTGGATTGTGAATCCACCATGCGCGACAAAGGCATGCATGAGCTTGGTATGGAACCTACTAAGTGATAACTTTCAAATTCAGAGAAACCCTGGAATCAAAAATGGGCAATCCTGAGCCAAATCCTGTTTTACAAGAACAAACAAGGGTTCAGAAAGCGAAAAAAAAAAAAGGGGGATAGGTGCAAAAACTCAACGGAAGCTGTTCTAAAAAAGGGGGTTGACTGCCTTTTTTGGTAAAAAAAGGAAAAAAAATCCTTCTATCGAATATCGAAACTCCATAAAGGATGAAGGATAAGCGTATATACCCTATGTATACACAATGAAAAACTATCTCAAAAATGACAACCGAATCCGTATTTTTTTTTATGAAAAAAAAAAAAATTGTTATGAATCAATTCCAAGTTGAAAAAAAAATCAAATATTCTTTGATCAAATCATTCCCTCCATAGTCTGATCGATCTTTTCTTTTGAAAAACTGATTAATCGGACAAAAATAAAAATAGAGTCCCATTCTACATGTCAATATCAATACCGGCAACAATGAAATTTAAAGTAAAAGGAAAATCCGTCAACTTTAAAAATCGGGAGGGTTCAAGTCCCCCTTTCCCCCAA
>DC23
ATTCACTGACTAGCTGCTATTGAGCCCCATCTACAAATGGATAATTCTGTCTTAGTAGAGACGAGTTTTTGAAAATAACGGAGAAATACCGACTCTCTTGCAAGAGAGTCGGTATTTCTCAGTTATTTTTTATGTTTTTCTTTAATAGTTTTTTATTTCTATCTTTTTTTTACGAAAAGTATTTTTATGCTTTTGCTTTTATTTTGTCTGATATTTTTGTTATGGTTATGGGCTCATATTCGTTATGTACCAGTATAATAATATTAGTTATTTGTTAATCCCACTAATAAAGTTCTAATTTTATTAATTCGATTCTAATTTTCGAATTTTTTAGTTTTTTTAATATAAAATAAAAGAAAAGAGAAAGTTGTAATTTTATGCCTCTTAGATCTTCATTTCTATTTTAAATGGTAGAAATTGAAACCTTTTTATTAAATATTTTATTAAATAGAAATAAAAAAAATTTTAAATCGTGGAGGAAGGGGGGGCGGATGTAGCCAAGTGGATCAAGGCAGTGGATTGTGAATCCACCATGCGCGAAAAAGGCATGCATGAGCTGGTATGGAACCTACTAAGTGATAACTTTCAAATTCAGAGAAACCCTGGAATCAAAAATGGGCAATCCTGAGCCAAATCCTGTTTTACAAGAACAAACAAGGGTTCAGAAAGCGAAAAAAAAAAAAGGGGGATAGGTGCAAAAACTCAACGGAAGCTGTTCTAAAAAATGGGGTTGACTGCCTTTTTTGGTAAAAAAAGGAAAAAAAATCCTTCTATCGAATATCGAAACTCCATAAAGGATGAAGGATAAGCGTATATACACTATGTATACACAATGAAAAACTATCTCAAAAATGACAACCGAATCCGTATTTTTTTTTATGAAAAAAAAAAAAATTGTTATGAATCAATTCCAAGTTGAAAAAAAAATCAAATATTCTTTGATCAAATCATTCCCTCCATAGTCTGATCGATCTTTTCTTTTGAAAAACTGATTAATCGGACAAAAATAAAAATAGAGTCCCATTCTACATGTCAATATCAATACCGGCAACAATGAAATTTAAAGTAAAAGGAAAATCCGTCAACTTTAAAAATCGGGAGGGTTCAAGTCCCTCTTTCCCCCAA
>DC24
ATTCACTGACTGCTGCTATTGAGCCCCATCTACAAATGGATAATTCTGTCTTAGTAGAGACGAGTTTTTGAAAATAACGGAGAAATACCGACTCTCTTGCAAGAGAGTCGGTATTTCTCCGTTATTTTTTATGTTTTTCTTTAATAGTTTTTTATTTCTATCTTTTTTTTACGAGCAGTATTTTTATGCTTTTGCTTTTATTTTGTCTGATATTTTTGTTATGGTTATGGGCTCATATTCGTTATGTACCAGTATAATAATATTAGTTATTTGTTAATCCCACTAATAAAGTTCTAATTTTATTAATTCGATTCTAATTTTCGAATTTTTTAGTTTTTTTAATATAAAATAAAAGAAAAGAGAAAGTTGTAATTTTATGCCTCTTAGATCTTCATTTCTATTTTAAATGGTAGAAATTGAAACCTTTTTATTAAATATTTTATTAAATACAAATAAAAAAAATTTTAAATCGTGGAGGAAGGGGGGGCGGATGTAGCCAAGTGGATCAAGGCAGTGGATTGTGAATCCACCATGCGCGACGAAGGATGCATGAGCTTGGTATGGAACCTACTAAGTGATAACTTTCAAATTCAGAGAAACCCTGGAATCAAAAATGGGCAATCCTGAGCCAAATCCTGTTTTACAAGAACAAACAAGGGTTCAGAAAGCGAAAAAAAAAAAAGGGGGATAGGTGCAAAAACTCAACGGAAGCTGTTCTAAAAAATGGGGTTGACTGCCTTTTTTGGTAAAAAAAGGAAAAAAAATCCTTCTATCGAATATCGAAACTCCATAAAGGATGAAGGATAAGCGTATATACCCTATGTATACACAATGAAAAACTATCTCAAAAATGACAACCGAATCCGTATTTTTTTTTATGAAAAAAAAAAAAATTGTTATGAATCAATTCCAAGTTGAAAAAAAAATCAAATATTCTTTGATCAAATCATTCCCTCCATAGTCTGATCGATCTTTTCTTTTGAAAAACTGATTAATCGGACAAAAATAAAAATAGAGTCCCATTCTACATGTCAATATCAATACCGGCAACAATGAAATTTAAAGTAAAAGGAAAATCCGTCAACTTTAAAAATCGTGAGGGTTCAAGTCCCCCTTTCCCCAAA
>DC25
AATCATCTGACTAGCTGCTATTGAGCCCCATCTACAAATGGATAATTCTGTCTTAGTAGAGACGAGTTTTTGAAAATAACGGAGAAATACCGACTCTCTTGCAAGAGAGTCGGTATTTCTCCGTTATTTTTTATGTTTTTCTTTAGTAGTTTTTTATTTCTATCTTTTTTTTACGAAAAGTATTTTTATGCTTTTGCTTTTATTTTGTCTGATATTTTTGTTATGGTTATGGGCTCATATTCGTTATGTACCAGTATAATAATATTAGTTATTTGTTAATCCCACTAATAAAGTTCTAATTTTATTAATTCGATTCTAATTTTCGAATTTTTTAGTTTTTTTAATATAAAATAAAAGAAAAGAGAAAGTTGTAATTTTATGCCTCTTAGATCTTCATTTCTATTTTAAATGGGAGAAATTGAAACCCTTTTATTAAATATTTTATTAAATAGAAATAAAAAAAATTTTAAATCGTGGAGGAAGGGGGGGCGGATGTAGCCAAGTGGATCAAGGCAGTGGATTGTGAATCCCCCATACGCGAGAAGGGCTTGCCATGAGCTTGGTATGGAACCTACTAAGTGATAACTTTCAAATTCAGAGAAACCCTGGAATCAAAAATGGGCAATCCTGAGCCAAATCCTGTTTTACAAGAACAAACAAGGGTTCAGAAAGCGAAAAAAAAAAAAGGGGGATAGGTGCAAAAACTCAACGGAAGCTGTTCTAAAAAATGGGGTTGACTGCCTTTTTTGGTAAAAAAAGGAAAAAAAATCCTTCTATCGAATATCGAAACTCCATAAAGGATGAAGGATAAGCGTATATACACTATGTATACACAATGAAAAACTATCTCAAAAATGACAACCGAATCCGTATTTTTTTTTATGAAAAAAAAAAAAATTGTTATGAATCAATTCCAAGTTGAAAAAAAAATCGAATATTCTTTGATCAAATCATTCCCTCCATAGTCTGATCGATCTTTTCTTTTGAAAAACTGATTAATCGGACAAAAATAAAAATAGAGTCCCATTCTACATGTCAATATCAATACCGGCAACAATGAAATTTAAAGTAAAAGGAAAATCCGTCAACTTTAAAAATCGGGAGGGTTCAAGTCTTTCTTTCCCCCAA
>DC26
ATCGCTGACTAGCTGCTATTGAGCCCCATCTACAAATGGATAATTCTGTCTTAGTAGAGACGAGTTTTTGAAAATAACGGAGAAATACCGACTCTCTTGCAAGAGAGTCGGTATTTCTCCGTTATTTTTTATGTTTTTCTTTAATAGTTTTTTATTTCTATCTTTTTTTTACGAAAAGTATTTTTATGCTTTTGCTTTTATTTTGTCTGATATTTTTGTTATGGTTATGGGCTCATATTCGTTATGTACCAGTATAATAATATTAGTTATTTGTTAATCCCACTAATAAAGTTCTAATTTTATTAATTCGATTCTAATTTTCGAATTTTTTAGTTTTTTTAATATAAAATAAAAGAAAAGAGAAAGTTGTAATTTTATGCCTCTTAGATCTTCATTTCTATTTTAAATGGTAGAAATTGAAACCTTTTTATTAAATATTTTATTAAATAGAAATAAAAAAAATTTTAAATCGTGGAGGAAGGGGGGGCGGATGTAGCCAAGTGGATCAAGGCAGTGGATTGTGAATCCACCATGCGCGAAGAGTTCTCATGATGAGCTGGTATGGAACCTACTAAGTGATAACTTTCAAATTCAGAGAAACCCTGGAATCAAAAATGGGCAATCCTGAGCCAAATCCTGTTTTACAAGAACAAACAAGGGTTCAGAAAGCGAAAAAAAAAAAAGGGGGATAGGTGCAAAAACTCAACGGAAGCTGTTCTAAAAAATGGGGTTGACTGCCTTTTTTGGTAAAAAAAGGAAAAAAAATCCTTCTATCGAATATCGAAACTCCATAAAGGATGAAGGATAAGCGTATATACCCTATGTATACCCAATGAAAAACTATCTCAAAAATGACAACCGAATCCGTATTTTTTTTTATGAAAAAAAAAAAAATTGTTATGAATCAATTCCAAGTTGAAAAAAAAATCGAATATTCTTTGATCAAATCATTCCCTCCATAGTCTGATCGATCTTTTCTTTTGAAAAACTGATTAATCGGACAAAAATAAAAATAGAGTCCCATTCTACATGTCAATATCAATACCGGCAACAATGAAATTTAAAGTAAAAGGAAAATCCGTCAACTTTAAAAATCGGGAGGGTTCAAGTCCCCCTTTCCCCCA
>DC27
CATCTGACTAGCTGCTATTGAGCCCCATCTACAAATGGATAATTCTGTCTTAGTAGAGACGAGTTTTTGAAAATAACGGAGAAATACCGACTCTCTTGCAAGAGAGTCGGTATTTCTCCGTTATTTTTTATGTTTTTCTTTAGTAGTTTTTTATTTCTATCTTTTTTTTACGAAAAGTATTTTTATGCTTTTGCTTTTATTTTGTCTGATATTTTTGTTATGGTTATGGGCTCATATTCGTTATGTACCAGTATAATAATATTAGTTATTTGTTAATCCCCCTAATAAAGTTCTAATTTTATTAATTCGATTCTAATTTTCGAATTTTTTAGTTTTTTTAATATAAAATAAAAGAAAAGAGAAAGTTGTAATTTTATGCCTCTTAAATCTTCATTTCTATTTTAAATGGGAGAAATTGAAACCCTTTTATTAAAAATTTTATTAAATACAAATAAAAAAAATTTTAAATCTTGGAGGAAGGGGGGGCGGATGTAGCCAAGTGGATAAAGGCAGTGGATTGTGAATCCCCCAAGAGCGAGAAGCACTCAATCATTGAGCTTGGTATGGAACCTACTAAGTGATAACTTTCAAATTCAGAGAAACCCTGGAATCAAAAATGGGCAATCCTGAGCCAAATCCTGTTTTACAAGAACAAACAAGGGTTCAGAAAGCGAAAAAAAAAAAAGGGGGATAGGGGCAAAAACTCAACGGAAGCTGTTCTAAAAAAGGGGGTTGACTGCCTTTTTTGGTAAAAAAAGGAAAAAAAATCCTTCTATCGAATATCGAAACTCCATAAAGGATGAAGGATAAGCGTATATACCCTATGTATACACAATGAAAAACTATCTCAAAAATGACAACCGAATCCGTATTTTTTTTTATGAAAAAAAAAAAAATTGTTATGAATCAATTCCAAGTTGAAAAAAAAATCAAATATTCTTTGATCAAATCATTCCCTCCATAGTCTGATCGATCTTTTCTTTTGAAAAACTGATTAATCGGACAAAAATAAAAATAGAGTCCCATTCTACATGTCAATATCAATACCGGCAACAATGAAATTTAAAGTAAAAGGAAAATCCGTCAACTTTAAAAATCGGGAGGGTTCAAGTCCTTTTTTCCCCCAACTA
>DC28
AATCACAGACTAGCTGCTATTGAGCCCCATCTACAAATGGATAATTCTGTCTTAGTAGAGACGAGTTTTTGAAAATAACGGAGAAATACCGACTCTCTTGCAAGAGAGTCGGTATTTCTCCGTTATTTTTTATGTTTTTCTTTAGTAGTTTTTTATTTCTATCTTTTTTTTACGAAAAGTATTTTTATGCTTTTGCTTTTATTTTGTCTGATATTTTTGTTATGGTTATGGGCTCATATTCGTTATGTACCAGTATAATAATATTAGTTATTTGTTAATCCCACTAATAAAGTTCTAATTTTATTAATTCGATTCTAATTTTCGAATTTTTTAGTTTTTTTAATATAAAATAAAAGAAAAGAGAAAGTTGTAATTTTATGCCTCTTAAATCTTCATTTCTATTTTAAATGGTAGAAATTGAAACCTTTTTATTAAATATTTTATTAAATACAAATAAAAAAAATTTTAAATCGTGGAGGAAGGGGGGGCGGATGTAGCCAAGTGGATCAAGGCAGTGGATTGTGAATCCCCCATCAGCGACGAGCTCGGCATGCATGAGCTTGGTATGGAACCTACTAAGTGATAACTTTCAAATTCAGAGAAACCCTGGAATCAAAAATGGGCAATCCTGAGCCAAATCCTGTTTTACAAGAACAAACAAGGGTTCAGAAAGCGAAAAAAAAAAAAGGGGGATAGGTGCAAAAACTCAACGGAAGCTGTTCTAAAAAATGGGGTTGACTGCCTTTTTTGGTAAAAAAAGGAAAAAAAATCCTTCTATCGAATATCGAAACTCCATAAAGGATGAAGGATAAGCGTATATACACTATGTATACACAATGAAAAACTATCTCAAAAATGACAACCGAATCCGTATTTTTTTTTATGAAAAAAAAAAAAATTGTTATGAATCAATTCCAAGTTGAAAAAAAAATCGAATATTCTTTGATCAAATCATTCCCTCCATAGTCTGATCGATCTTTTCTTTTGAAAAACTGATTAATCGGACAAAAATAAAAATAGAGTCCCATTCTACATGTCAATATCAATACCGGCAACAATGAAATTTAAAGTAAAAGGAAAATCCGTCAACTTTAAAAATCGGGAGGGTTCAAGTCCCCCTTTCCCCCAA
>DC29
ATCTCTGACTAGCTGCTATTGAGCCCCATCTACAAATGGATAATTCTGTCTTAGTAGAGACGAGTTTTTGAAAATAACGGAGAAATACCGACTCTCTTGCAAGAGAGTCGGTATTTCTCCGTTATTTTTTATGTTTTTCTTTAATAGTTTTTTATTTCTATCTTTTTTTTACGAAAAGTATTTTTATGCTTTTGCTTTTATTTTGTCTGATATTTTTGTTATGGTTATGGGCTCATATTCGTTATGTACCAGTATAATAATATTAGTTATTTGTTAATCCCACTAATAAAGTTCTAATTTTATTAATTCGATTCTAATTTTCGAATTTTTTAGTTTTTTTAATATAAAATAAAAGAAAAGAGAAAGTTGTAATTTTATGCCTCTTAAATCTTCATTTCTATTTTAAATGGTAGAAATTGAAACCTTTTTATTAAATATTTTATTAAATAGAAATAAAAAAAATTTTAAATCGTGGAGGAAGGGGGGGCGGATGTAGCCAAGTGGATCAAGGCAGTGGATTGTGAATCCCCCATGAGCGAGAACGCATGGATGAGCTTGGTATGGAACCTACTAAGTGATAACTTTCAAATTCAGAGAAACCCTGGAATCAAAAATGGGCAATCCTGAGCCAAATCCTGTTTTACAAGAACAAACAAGGGTTCAGAAAGCGAAAAAAAAAAAAGGGGGATAGGGGCAGAAACTCAACGGAAGCTGTTCTAAAAAAGGGGGTTGACTGCCTTTTTTGGTAAAAAAAGGAAAAAAAATCCTTCTATCGAATATCGAAACTCCATAAAGGATGAAGGATAAGCGTATATACACTATGTATACACAATGAAAAACTATCTCAAAAATGACAACCGAATCCGTATTTTTTTTTATGAAAAAAAAAAAAATTGTTATGAATCAATTCCAAGTTGAAAAAAAAATCGAATATTCATTGATCAAATCATTCCCTCCATAGTCTGATCGATCTTTTCTTTTGAAAAACTGATTAATCGGACAAAAATAAAAATAGAGTCCCATTCTACATGTCAATATCAATACCGGCAACAATGAAATTTAAAGTAAAAGGAAAATCCGTCAACTTTAAAAATCGGGAGGGTTCAAGTCCCTCTATCCCAAAGTGAAAT
>XY01
ATCGCTGACTAGCTGCTATTGAGCCCCATCTACAAATGGATAATTCTGTCTTAGTGGAGACGAGTTTTTGAAAATAACGGAGAAATACCGACTCTCTTGCAAGAGAGTCGGTATTTCTCCGTTATTTTTTATGTTTTTCTTTAGTAGTTTTTTATTTCTATCTTTTTTTTACGAAAAGTATTTTTATGCTTTTGCTTTGATTTTGTCTGATATTTTTGTTATGGTTATGGGCTCATATTCGTTATGTACCAGTATAATAATATTAGTTATTTGTTAATCCCACTAATAAAGTTCTAATTTTATTAATTCGATTCTAATTTTCGAATTTTTTAGTTTTTTTAATATAAAATAAAAGAAAAGAGAAAGTTGTAATTTTATGCCTCTTAGATCTTCATTTCTATTTTAATCATTTCTATTTTAAATGGTAGAAATTGAAACCTTTTTATTAAATATTTTATTAAATAGAAATAAAAAAATTTTTAAATCGTGGAGGAAGGGGGGGCGGATGTAGCCAAGTGGATCAAGGCAGTGGATTGTGAATCCACCAAACGCGAAGAGTTGCATGCATGAGCTGGTATGGAACCTACTAAGTGATAACTTTCAAATTCAGAGAAACCCTGGAATCAAAAATGGGCAATCCTGAGCCAAATCCTGTTTTACAAGAACAAACAAGGGTTCAGAAAGCGAAAAAAAAAAAGGGGGATAGGTGCAAAGACTCAACGGAAGCTGTTCTAAAAAATGGGGTTGACTGCCTTTTTTGGTAAAGAAAGGAAAAAAAATCCTTCTATCGAATATCGAAACTCCATAAAGGATGAAGGATAAGCGTATATACACTATGTATACACAATGAAAAACTATCTCAAAAATGACAACCGAATCCGTATTTTTTTTTATGAAAAAAAAAAAAATTGTTATGAATCAATTCCAAGTTGAAAAAAGAATCGAATATTCATTGATCAAATCATTCACTCCATAGTCTGATCGATCTTTTCTTTTGAAAAACTGATTAATCGGACAAAAATAAAAATAGAGTCCCATTCTACATGTCAATATCAATACCGGCAACAATGAAATTTAAAGTAAGAGGAAAATCCGTCGACTTTAAAAATCGTGAGGGTTCAAGTCCCCTTTTCCCCAAA
>XY02
ATCACTGACTAGCTGCTATTGAGCCCCATCTACAAATGGATAATTCTGTCTTAGTGGAGACGAGTTTTTGAAAATAACGGAGAAATACCGACTCTCTTGCAAGAGAGTCGGTATTTCTCCGTTATTTTTTATGTTTTTCTTTAGTAGTTTTTTATTTCTATCTTTTTTTTACGAAAAGTATTTTTATGCTTTTGCTTTGATTTTGTCTGATATTTTTGTTATGGTTATGGGCTCATATTCGTTATGTACCAGTATAATAATATTAGTTATTTGTTAATCCCACTAATAAAGTTCTAATTTTATTAATTCGATTCTAATTTTCGAATTTTTTAGTTTTTTTAATATAAAATAAAAGAAAAGAGAAAGTTGTAATTTTATGCCTCTTAGATCTTCATTTCTATTTTAATCATTTCTATTTTAAATGGTAGAAATTGAAACCTTTTTATTAAATATTTTATTAAATAGAAATAAAAAAATTTTTAAATCGTGGAGGAAGGGGGGGCGGATGTAGCCAAGTGGATCAAGGCAGTGGATTGTGAATCCACCAAACGCGAGGACTCATGCTGAGCTGGTATGGAACCTACTAAGTGATAACTTTCAAATTCAGAGAAACCCTGGAATCAAAAATGGGCAATCCTGAGCCAAATCCTGTTTTACAAGAACAAACAAGGGTTCAGAAAGCGAAAAAAAAAAAGGGGGATAGGTGCAAAAACTCAACGGAAGCTGTTCTAAAAAATGGGGTTGACTGCCTTTTTTGGTAAAAAAAGGAAAAAAAATCCTTCTATCGAATATCGAAACTCCATAAAGGATGAAGGATAAGCGTATATACACTATGTATACACAATGAAAAACTATCTCAAAAATGACAACCGAATCCGTATTTTTTTTTATGAAAAAAAAAAAAATTGTTATGAATCAATTCCAAGTTGAAAAAAGAATCGAATATTCATTGATCAAATCATTCACTCCATAGTCTGATCGATCTTTTCTTTTGAAAAACTGATTAATCGGACAAAAATAAAGATAGAGTCCCATTCTACATGTCAATATCAATACCGGCAACAATGAAATTTAAAGTAAGAGGAAAATCCGTCGACTTTAAAAATCGTGAGGGTTCAAGTCCTTTTTATCCCCCAA
>XY03
AATCACTGACTAGCTGCTATTGAGCCCCATCTACAAATGGATAATTCTGTCTTAGTGGAGACGAGTTTTTGAAAATAACGGAGAAATACCGACTCTCTTGCAAGAGAGTCGGTATTTCTCCGTTATTTTTTATGTTTTTCTTTAGTAGTTTTTTATTTCTATCTTTTTTTTACGGGCAGTATTTTTATGCTTTTGCTTTGATTTTGTCTGATATTTTTGTTATGGTTATGGGCTCATATTCGTTATGTACCAGTATAATAATATTAGTTATTTGTTAATCCCACTAATAAAGTTCTAATTTTATTAATTCGATTCTAATTTTCGAATTTTTTAGTTTTTTTAATATAAAATAAAAGAAAAGAGAAAGTTGTAATTTTATGCCTCTTAGATCTTCATTTCTATTTTAATCATTTCTATTTTAAATGGTAGAAATTGAAACCTTTTTATTAAATATTTTATTAAATAGAAATAAAAAAATTTTTAAATCGTGGAGGAAGGGGGGGCGGATGTAGCCAAGTGGATCAAGGCAGTGGATTGTGAATCCACCAAACGCGATTTGATGAGCTTGGTATGGACCTACTAAGTGATAACTTTCAAATTCAGAGAAACCCTGGAATCAAAAATGGGCAATCCTGAGCCAAATCCTGTTTTACAAGAACAAACAAGGGTTCAGAAAGCGAAAAAAAAAAAGGGGGATAGGTGCAGAGACTCAACGGAAGCTGTTCTAAGAAATGGGGTTGACTGCCTTTTTTGGTAAAGAAAGGAAAAGAAATCCTTCTATCGAATATCGAAACTCCATAAAGGATGAAGGATAAGCGTATATACACTATGTATACACAATGAAAAACTATCTCAAAAATGACAACCGAATCCGTATTTTTTTTTATGAAAAAAAAAAAAATTGTTATGAATCAATTCCAAGTTGAAAAAAGAATCGAATATTCATTGATCAAATCATTCACTCCATAGTCTGATCGATCTTTTCTTTTGAAAAACTGATTAATCGGACAAAAATAAAGATAGAGTCCCATTCTACATGTCAATATCAATACCGGCAACAATGAAATTTAAAGTAAGAGGAAAATCCGTCGACTTTAAAAATCGTGAGGGTTCAAGTCCTCTTTTCCCCCA
>XY04
TCACTGACTAGCTGCTATTGAGCCCCATCTACAAATGGATAATTCTGTCTTAGTGGAGACGAGTTTTTGAAAATAACGGAGAAATACCGACTCTCTTGCAAGAGAGTCGGTATTTCTCAGTTATTTTTTATGTTTTTCTTTAGTAGTTTTTTATTTCTATCTTTTTTTTACGAAAAGTATTTTTATGCTTTTGCTTTGATTTTGTCTGATATTTTTGTTATGGTTATGGGCTCATATTCGTTATGTACCAGTATAATAATATTAGTTATTTGTTAATCCCACTAATAAAGTTCTAATTTTATTAATTCGATTCTAATTTTCGAATTTTTTAGTTTTTTTAATATAAAATAAAAGAAAAGAGAAAGTTGTAATTTTATGCCTCTTAGATCTTCATTTCTATTTTAATCATTTCTATTTTAAATGGTAGAAATTGAAACCTTTTTATTAAATATTTTATTAAATAGAAATAAAAAAATTTTTAAATCGTGGAGGAAGGGGGGGCGGATGTAGCCAAGTGGATCAAGGCAGTGGATTGTGAATCCACCAAACGCGACGAGTTCTATTCTGAACCTTGGTATGGAACCTTACTAAGTGATAACTTTTCAAATTTCAGAAGAAACCCTGGAATCAAAAATGGGCAATCCTGAGCCAAATCCTGTTTTACAAGAACAAACAAGGGTTCAGAAAGCGAAAAAAAAAAAGGGGGATAGGTGCAAAGACTCAACGGAAGCTGTTCTAAAAAATGGGGTTGACTGCCTTTTTTGGTAAAAAAAGGAAAAAAAATCCTTCTATCGAATATCGAAACTCCATAAAGGATGAAGGATAAGCGTATATACACTATGTATACACAATGAAAAACTATCTCAAAAATGACAACCGAATCCGTATTTTTTTTTATGAAAAAAAAAAAAATTGTTATGAATCAATTCCAAGTTGAAAAAAGAATCGAATATTCATTGATCAAATCATTCACTCCATAGTCTGATCGATCTTTTCTTTTGAAAAACTGATTAATCGGACAAAAATAAAGATAGAGTCCCATTCTACATGTCAATATCAATACCGGCAACAATGAAATTTAAAGTAAAAGGAAAATCCGTCGACTTTAAAAATCGTGAGGGTTCAAGTCTCCTTTTTCCCCCAAA
>XY05
TATTCACTGACTAGCTGCTATTGAAGCCCCATCTACAAATGGATAATTCTGTCTTAGTGGAGACGAAGTTTTTGAAAATAACGGTAGAAATACCGACTCTCTTGCAAGAGAGTCGGTATTTCTCCGTTATTTTTTATGTTTTTCTTTAGTAGTTTTTTATTTCTATCTTTTTTTTACGAAAAGTATTTTTATGCTTTTGCTTTGATTTTGTCTGATATTTTTGTTATGGTTATGGGCTCATATTCGTTATGTACCAGTATAATAATATTAGTTATTTGTTAATCCCACTAATAAAGTTCTAATTTTATTAATTCGATTCTAATTTTCGAATTTTTTAGTTTTTTTAATATAAAATAAAAGAAAAGAGAAAGTTGTAATTTTATGCCTCTTAGATCTTCATTTCTATTTTAATCATTTCTATTTTAAATGGTAGAAATTGAAACCTTTTTATTAAATATTTTATTAAATAGAAATAAAAAAATTTTTAAATCGTGGAGGAAGGGGGGGCGGATGTAGCCAAGTGGATCAAGGCAGTGGATTGTGAATCCACCATGACGCGAGGAGTGCATGCTGAGCTGGTATGGAACCTACTAAGTGATAACTTTCAAATTCAGAGAAACCCTGGAATCAAAAATGGGCAATCCTGAGCCAAATCCTGTTTTACAAGAACAAACAAGGGTTCAGAAAGCGAAAAAAAAAAAGGGGGATAGGTGCAGAGACTCAACGGAAGCTGTTCTAAAAAATGGGGTTGACTGCCTTTTTTGGTAAAGAAAGGAAAAAAAATCCTTCTATCGAATATCGAAACTCCATAAAGGATGAAGGATAAGCGTATATACACTATGTATACACAATGAAAAACTATCTCAAAAATGACAACCGAATCCGTATTTTTTTTTATGAAAAAAAAAAAAATTGTTATGAATCAATTCCAAGTTGAAAAAAGAATCGAATATTCATTGATCAAATCATTCACTCCATAGTCTGATCGATCTTTTCTTTTGAAAAACTGATTAATCGGACAAAAATAAAGATAGAGTCCCATTCTACATGTCAATATCAATACCGGCAACAATGAAATTTAAAGTAAGAGGAAAATCCGTCGACTTTAAAAATCGTGAGGGTTCAAGTCTTTCTTACCCCAAA
>XY06
ATGTTGACTAGCTGCTATTGAGCCCCATCTACAAATGGATAATTCTGTCTTAGTGGAGACGAGTTTTTGAAAATAACGGAGAAATACCGACTCTCTTGCAAGAGAGTCGGTATTTCTCCGTTATTTTTTATGTTTTTCTTTAGTAGTTTTTTATTTCTATCTTTTTTTTACGAAAAGTATTTTTATGCTTTTGCTTTGATTTTGTCTGATATTTTTGTTATGGTTATGGGCTCATATTCGTTATGTACCAGTATAATAATATTAGTTATTTGTTAATCCCACTAATAAAGTTCTAATTTTATTAATTCGATTCTAATTTTCGAATTTTTTAGTTTTTTTAATATAAAATAAAAGAAAAGAGAAAGTTGTAATTTTATGCCTCTTAGATCTTCATTTCTATTTTAATCATTTCTATTTTAAATGGTAGAAATTGAAACCTTTTTATTAAATATTTTATTAAATAGAAATAAAAAAATTTTTAAATCGTGGAGGAAGGGGGGGCGGATGTAGCCAAGTGGATCAAGGCAGTGGATTGTGAATCCACCATGCGCGAGGAGATGCATGAGCTTGGTATGGAACCTACTAAGTGATAACTTTCAAATTCAGAGAAACCCTGGAATCAAAAATGGGCAATCCTGAGCCAAATCCTGTTTTACAAGAACAAACAAGGGTTCAGAAAGCGAAAAAAAAAAAGGGGGATAGGTGCAGAGACTCAACGGAAGCTGTTCTAAAAAATGGGGTTGACTGCCTTTTTTGGTAAAGAAAGGAAAAGAAATCCTTCTATCGAATATCGAAACTCCATAAAGGATGAAGGATAAGCGTATATACACTATGTATACACAATGAAAAACTATCTCAAAAATGACAACCGAATCCGTATTTTTTTTTATGAAAAAAAAAAAAATTGTTATGAATCAATTCCAAGTTGAAAAAAGAATCGAATATTCATTGATCAAATCATTCACTCCATAGTCTGATCGATCTTTTCTTTTGAAAAACTGATTAATCGGACAAAAATAAAGATAGAGTCCCATTCTACATGTCAATATCAATACCGGCAACAATGAAATTTAAAGTAAGAGGAAAATCCGTCGACTTTAAAAATCGTGAGGGTTCAAGTCCTTCTTATTCCCCAAAA
>XY07
ATCTCTGACTAGCTGCTATTGAGCCCCATCTACAAATGGATAATTCTGTCTTAGTGGAGACGAGTTTTTGAAAATAACGGAGAAATACCGACTCTCTTGCAAGAGAGTCGGTATTTCTCCGTTATTTTTTATGTTTTTCTTTAGTAGTTTTTTATTTCTATCTTTTTTTTACGAAAAGTATTTTTATGCTTTTGCTTTGATTTTGTCTGATATTTTTGTTATGGTTATGGGCTCATATTCGTTATGTACCAGTATAATAATATTAGTTATTTGTTAATCCCACTAATAAAGTTCTAATTTTATTAATTCGATTCTAATTTTCGAATTTTTTAGTTTTTTTAATATAAAATAAAAGAAAAGAGAAAGTTGTAATTTTATGCCTCTTAGATCTTCATTTCTATTTTAATCATTTCTATTTTAAATGGTAGAAATTGAAACCTTTTTATTAAATATTTTATTAAATAGAAATAAAAAAATTTTTAAATCGTGGAGGAAGGGGGGGCGGATGTAGCCAAGTGGATCAAGGCAGTGGATTGTGAATCCACCAAACGCGAGGAGTTCAATTCGGATGCATGAGCTTGGTATGGAACCTACTAAGTGATAACTTTCAAATTCAGAGAAACCCTGGAATCAAAAATGGGCAATCCTGAGCCAAATCCTGTTTTACAAGAACAAACAAGGGTTCAGAAAGCGAAAAAAAAAAAGGGGGATAGGTGCAAAGACTCAACGGAAGCTGTTCTAAAAAATGGGGTTGACTGCCTTTTTTGGTAAAAAAAGGAAAAAAAATCCTTCTATCGAATATCGAAACTCCATAAAGGATGAAGGATAAGCGTATATACACTATGTATACACAATGAAAAACTATCTCAAAAATGACAACCGAATCCGTATTTTTTTTTATGAAAAAAAAAAAAATTGTTATGAATCAATTCCAAGTTGAAAAAAGAATCGAATATTCATTGATCAAATCATTCACTCCATAGTCTGATCGATCTTTTCTTTTGAAAAACTGATTAATCGGACAAAAATAAAAATAGAGTCCCATTCTACATGTCAATATCAATACCGGCAACAATGAAATTTAAAGTAAAAGGAAAATCCGTCGACTTTAAAAATCGTGAGGGTTCAAGTCCTTTTTATCCCCACAAA
>XY08
ATCGCTGACTAGCTGCTATTGAGCCCCATCTACAAATGGATAATTCTGTCTTAGTGGAGACGAGTTTTTGAAAATAACGGAGAAATACCGACTCTCTTGCAAGAGAGTCGGTATTTCTCCGTTATTTTTTATGTTTTTCTTTAGTAGTTTTTTATTTCTATCTTTTTTTTACGAAAAGTATTTTTATGCTTTTGCTTTGATTTTGTCTGATATTTTTGTTATGGTTATGGGCTCATATTCGTTATGTACCAGTATAATAATATTAGTTATTTGTTAATCCCACTAATAAAGTTCTAATTTTATTAATTCGATTCTAATTTTCGAATTTTTTAGTTTTTTTAATATAAAATAAAAGAAAAGAGAAAGTTGTAATTTTATGCCTCTTAGATCTTCATTTCTATTTTAATCATTTCTATTTTAAATGGTAGAAATTGAAACCTTTTTATTAAATATTTTATTAAATAGAAATAAAAAAATTTTTAAATCGTGGAGGAAGGGGGGGCGGATGTAGCCAAGTGGATCAAGGCAGTGGATTGTGAATCCACCAAACGCGAAGAGTGTTGCATGACCTTGGTATGGAACCTTACTTAAGTGATAACTTTTCAAATTTCAGAAGAAACCCTGGAATTCAAAAATTGGGCAATCCTTGAGCCAAATCCTTGTTTTACAAGAACAAACAAGGGTTCAGAAAGCGAAAAAAAAAAAGGGGGATAGGTGCAGAGACTCAACGGAAGCTGTTCTAAAAAATGGGGTTGACTGCCTTTTTTGGTAAAGAAAGGAAAAAAAATCCTTCTATCGAATATCGAAACTCCATAAAGGATGAAGGATAAGCGTATATACACTATGTATACACAATGAAAAACTATCTCAAAAATGACAACCGAATCCGTATTTTTTTTTATGAAAAAAAAAAAAATTGTTATGAATCAATTCCAAGTTGAAAAAAGAATCGAATATTCATTGATCAAATCATTCACTCCATAGTCTGATCGATCTTTTCTTTTGAAAAACTGATTAATCGGACAAAAATAAAGATAGAGTCCCATTCTACATGTCAATATCAATACCGGCAACAATGAAATTTAAAGTAAGAGGAAAATCCGTCGACTTTAAAAATCGTGAGGGTTCAAGTCTTTTTTTTTCCCCCAA
>XY09
ATTCATTTGACTAGCTGCTATTGAGCCCCATCTACAAATGGATAATTCTGTCTTAGTGGAGACGAGTTTTTGAAAATAACGGAGAAATACCGACTCTCTTGCAAGAGAGTCGGTATTTCTCCGTTATTTTTTATGTTTTTCTTTAGTAGTTTTTTATTTCTATCTTTTTTTTACGAAAAGTATTTTTATGCTTTTGCTTTGATTTTGTCTGATATTTTTGTTATGGTTATGGGCTCATATTCGTTATGTACCAGTATAATAATATTAGTTATTTGTTAATCCCACTAATAAAGTTCTAATTTTATTAATTCGATTCTAATTTTCGAATTTTTTAGTTTTTTTAATATAAAATAAAAGAAAAGAGAAAGTTGTAATTTTATGCCTCTTAGATCTTCATTTCTATTTTAATCATTTCTATTTTAAATGGTAGAAATTGAAACCTTTTTATTAAATATTTTATTAAATAGAAATAAAAAAATTTTTAAATCGTGGAGGAAGGGGGGGCGGATGTAGCCAAGTGGATCAAGGCAGTGGATTGTGAATCCACCATGCGCGAGGAGGATGCATGAGCTTGGTATGGAACCTACTAAGTGATAACTTTCAAATTCAGAGAAACCCTGGAATCAAAAATGGGCAATCCTGAGCCAAATCCTGTTTTACAAGAACAAACAAGGGTTCAGAAAGCGAAAAAAAAAAAGGGGGATAGGTGCAGAGACTCAACGGAAGCTGTTCTAAAAAATGGGGTTGACTGCCTTTTTTGGTAAAGAAAGGAAAAGAAATCCTTCTATCGAATATCGAAACTCCATAAAGGATGAAGGATAAGCGTATATACACTATGTATACACAATGAAAAACTATCTCAAAAATGACAACCGAATCCGTATTTTTTTTTATGAAAAAAAAAAAAATTGTTATGAATCAATTCCAAGTTGAAAAAAGAATCGAATATTCATTGATCAAATCATTCACTCCATAGTCTGATCGATCTTTTCTTTTGAAAAACTGATTAATCGGACAAAAATAAAGATAGAGTCCCATTCTACATGTCAATATCAATACCGGCAACAATGAAATTTAAAGTAAGAGGAAAATCCGTCGACTTTAAAAATCGTGAGGGTTCAAGTCCCCCTTTTCCCCCAA
>XY10
AAGTTCACTGACTGCTGCTATTGAGCCCCATCTACAAATGGATAATTCTGTCTTAGTGGAGACGAGTTTTTGAAAATAACGGAGAAATACCGACTCTCTTGCAAGAGAGTCGGTATTTCTCCGTTATTTTTTATGTTTTTCTTTAGTAGTTTTTTATTTCTATCTTTTTTTTGGGGCAGTATTTTTATGCTTTTGCTTTGATTTTGTCTGATATTTTTGTTATGGTTATGGGCTCATATTCGTTATGTACCAGTATAATAATATTAGTTATTTGTTAATCCCACTAATAAAGTTCTAATTTTATTAATTCGATTCTAATTTTCGAATTTTTTAGTTTTTTTAATATAAAATAAAAGAAAAGAGAAAGTTGTAATTTTATGCCTCTTAGATCTTCATTTCTATTTTAATCATTTCTATTTTAAATGGTAGAAATTGAAACCTTTTTATTAAATATTTTATTAAATAGAAATAAAAAAATTTTTAAATCGTGGAGGAAGGGGGGGCGGATGTAGCCAAGTGGATCAAGGCAGTGGATTGTGAATCCACCAAACGCGAGGAAGGATGCATGAGCTTGGTATGGAACCTACTAAGTGATAACTTTCAAATTCAGAGAAACCCTGGAATCAAAAATGGGCAATCCTGAGCCAAATCCTGTTTTACAAGAACAAACAAGGGTTCAGAAAGCGAAAAAAAAAAAGGGGGATAGGTGCAAAAACTCAACGGAAGCTGTTCTAAAAAATGGGGTTGACTGCCTTTTTTGGTAAAAAAAGGAAAAAAAATCCTTCTATCGAATATCGAAACTCCATAAAGGATGAAGGATAAGCGTATATACACTATGTATACACAATGAAAAACTATCTCAAAAATGACAACCGAATCCGTATTTTTTTTTATGAAAAAAAAAAAAATTGTTATGAATCAATTCCAAGTTGAAAAAAAAATCGAATATTCATTGATCAAATCATTCACTCCATAGTCTGATCGATCTTTTCTTTTGAAAAACTGATTAATCGGACAAAAATAAAAATAGAGTCCCATTCTACATGTCAATATCAATACCGGCAACAATGAAATTTAAAGTAAAAGGAAAATCCGTCAACTTTAAAAATCGGGAGGGTTCAAGTCCCCCCTTACCCCCAA
>XY11
AATCACTGACTAGCTGCTATTGAGCCCCATCTACAAATGGATAATTCTGTCTTAGTGGAGACGAGTTTTTGAAAATAACGGAGAAATACCGACTCTCTTGCAAGAGAGTCGGTATTTCTCCGTTATTTTTTATGTTTTTCTTTAGTAGTTTTTTATTTCTATCTTTTTTTTACGAAAAGTATTTTTATGCTTTTGCTTTGATTTTGTCTGATATTTTTGTTATGGTTATGGGCTCATATTCGTTATGTACCAGTATAATAATATTAGTTATTTGTTAATCCCACTAATAAAGTTCTAATTTTATTAATTCGATTCTAATTTTCGAATTTTTTAGTTTTTTTAATATAAAATAAAAGAAAAGAGAAAGTTGTAATTTTATGCCTCTTAGATCTTCATTTCTATTTTAATCATTTCTATTTTAAATGGTAGAAATTGAAACCTTTTTATTAAATATTTTATTAAATAGAAATAAAAAAATTTTTAAATCGTGGAGGAAGGGGGGGCGGATGTAGCCAAGTGGATCAAGGCAGTGGATTGTGAATCCACCAAACGCGAGGATGCATGAGCTTGGTATGGAACCTACTAAGTGATAACTTTCAAATTCAGAGAAACCCTGGAATCAAAAATGGGCAATCCTGAGCCAAATCCTGTTTTACAAGAACAAACAAGGGTTCAGAAAGCGAAAAAAAAAAAGGGGGATAGGTGCAAAAACTCAACGGAAGCTGTTCTAAAAAATGGGGTTGACTGCCTTTTTTGGTAAAAAAAGGAAAAAAAATCCTTCTATCGAATATCGAAACTCCATAAAGGATGAAGGATAAGCGTATATACACTATGTATACACAATGAAAAACTATCTCAAAAATGACAACCGAATCCGTATTTTTTTTTATGAAAAAAAAAAAAATTGTTATGAATCAATTCCAAGTTGAAAAAAGAATCGAATATTCATTGATCAAATCATTCACTCCATAGTCTGATCGATCTTTTCTTTTGAAAAACTGATTAATCGGACAAAAATAAAAATAGAGTCCCATTCTACATGTCAATATCAATACCGGCAACAATGAAATTTAAAGTAAGAGGAAAATCCGTCAACTTTAAAAATCGTGAGGGTTCAAGTCCCCCTATCCCCCAA
>XY12
TATCTGACTAGCTGCTATTGAGCCCCATCTACAAATGGATAATTCCTGTCCTTCGTGGAAGACGAAGTTTTTGAAAATAACGGTAGAAATACCGACTCTCTTGCAAGAGAGTCGGTATTTCTCCGTTATTTTTTATGTTTTTCTTTAGTAGTTTTTTATTTCTATCTTTTTTTTACGGGCAGTATTTTTATGCTTTTGCTTTGGAAGGTCTGATATTTTTGTTATGGTTATGGGCTCATATTCGTTATGTACCAGTATAATAATATTAGTTATTTGTTAATCCCACTAATAAAGTTCTAATTTTATTAATTCGATTCTAATTTTCGAATTTTTTAGTTTTTTTAATATAAAATAAAAGAAAAGAGAAAGTTGTAATTTTATGCCTCTTAGATCTTCATTTCTATTTTAATCATTTCTATTTTAAATGGTAGAAATTGAAACCTTTTTATTAAATATTTTATTAAATAGAAATAAAAAAATTTTTAAATCGTGGAGGAAGGGGGGGCGGATGTAGCCAAGTGGATCAAGGCAGTGGATTGTGAATCCACCAACAGCGAAGAGGCATGCATGAGCTTGGTATGGAACCTACTAAGTGATAACTTTCAAATTCAGAGAAACCCTGGAATCAAAAATGGGCAATCCTGAGCCAAATCCTGTTTTACAAGAACAAACAAGGGTTCAGAAAGCGAAAAAAAAAAAGGGGGATAGGTGCAGAGACTCAACGGAAGCTGTTCTAAAAAATGGGGTTGACTGCCTTTTTTGGTAAAAAAAGGAAAAAAAATCCTTCTATCGAATATCGAAACTCCATAAAGGATGAAGGATAAGCGTATATACACTATGTATACACAATGAAAAACTATCTCAAAAATGACAACCGAATCCGTATTTTTTTTTATGAAAAAAAAAAAAATTGTTATGAATCAATTCCAAGTTGAAAAAAGAATCGAATATTCATTGATCAAATCATTCACTCCATAGTCTGATCGATCTTTTCTTTTGAAAAACTGATTAATCGGACAAAAATAAAGATAGAGTCCCATTCTACATGTCAATATCAATACCGGCAACAATGAAATTTAAAGTAAGAGGAAAATCCGTCGACTTTAAAAATCGGGAGGGTTCAAGTCCTTTTTTCCCCCAA
>XY13
ATCGCTGACTAGCTGCTATTGAGCCCCATCTACAAATGGATAATTCTGTCTTAGTGGAGACGAGTTTTTGAAAATAACGGAGAAATACCGACTCTCTTGCAAGAGAGTCGGTATTTCTCCGTTATTTTTTATGTTTTTCTTTAGTAGTTTTTTATTTCTATCTTTTTTTTACGAAAAGTATTTTTATGCTTTTGCTTTGATTTTGTCTGATATTTTTGTTATGGTTATGGGCTCATATTCGTTATGTACCAGTATAATAATATTAGTTATTTGTTAATCCCACTAATAAAGTTCTAATTTTATTAATTCGATTCTAATTTTCGAATTTTTTAGTTTTTTTAATATAAAATAAAAGAAAAGAGAAAGTTGTAATTTTATGCCTCTTAGATCTTCATTTCTATTTTAATCATTTCTATTTTAAATGGTAGAAATTGAAACCTTTTTATTAAATATTTTATTAAATAGAAATAAAAAAATTTTTAAATCGTGGAGGAAGGGGGGGCGGATGTAGCCAAGTGGATCAAGGCAGTGGATTGTGAATCCACCAAGACGCGAGGAAGCATGCATGAGCTTGGTATGGAACCTACTAAGTGATAACTTTCAAATTCAGAGAAACCCTGGAATCAAAAATGGGCAATCCTGAGCCAAATCCTGTTTTACAAGAACAAACAAGGGTTCAGAAAGCGAAAAAAAAAAAGGGGGATAGGTGCAGAGACTCAACGGAAGCTGTTCTAAAAAATGGGGTTGACTGCCTTTTTTGGTAAAAAAAGGAAAAAAAATCCTTCTATCGAATATCGAAACTCCATAAAGGATGAAGGATAAGCGTATATACACTATGTATACACAATGAAAAACTATCTCAAAAATGACAACCGAATCCGTATTTTTTTTTATGAAAAAAAAAAAAATTGTTATGAATCAATTCCAAGTTGAAAAAAGAATCGAATATTCATTGATCAAATCATTCACTCCATAGTCTGATCGATCTTTTCTTTTGAAAAACTGATTAATCGGACAAAAATAAAGATAGAGTCCCATTCTACATGTCAATATCAATACCGGCAACAATGAAATTTAAAGTAAGAGGAAAATCCGTCGACTTTAAAAATCGTGAGGGTTCAAGTCCTTCTTAATCCCCAA
>XY14
ATCACTGACTAGCTGCTATTGAGCCCCATCTACAAATGGATAATTCTGTCTTAGTGGAGACGAGTTTTTGAAAATAACGGTAGAAATACCGACTCTCTTGCAAGAGAGTCGGTATTTCTCAGTTATTTTTTATGTTTTTCTTTAGTAGTTTTTTATTTCTATCTTTTTTTTACGAAAAGTATTTTTATGCTTTTGCTTTGATTTTGTCTGATATTTTTGTTATGGTTATGGGCTCATATTCGTTATGTACCAGTATAATAATATTAGTTATTTGTTAATCCCACTAATAAAGTTCTAATTTTATTAATTCGATTCTAATTTTCGAATTTTTTAGTTTTTTTAATATAAAATAAAAGAAAAGAGAAAGTTGTAATTTTATGCCTCTTAGATCTTCATTTCTATTTTAATCATTTCTATTTTAAATGGTAGAAATTGAAACCTTTTTATTAAATATTTTATTAAATAGAAATAAAAAAATTTTTAAATCGTGGAGGAAGGGGGGGCGGATGTAGCCAAGTGGATCAAGGCAGTGGATTGTGAATCCACCAAACGCGAGAAAGCATTGGCATGAGCTGGTATGGAACCTACTAAGTGATAACTTTCAAATTCAGAGAAACCCTGGAATCAAAAATGGGCAATCCTGAGCCAAATCCTGTTTTACAAGAACAAACAAGGGTTCAGAAAGCGAAAAAAAAAAAGGGGGATAGGGGCAGAGACTCAACGGAAGCTGTTCTAAAAAATGGGGTTGACTGCCTTTTTTGGTAAAGAAAGGAAAAAAAATCCTTCTATCGAATATCGAAACTCCATAAAGGATGAAGGATAAGCGTATATACACTATGTATACACAATGAAAAACTATCTCAAAAATGACAACCGAATCCGTATTTTTTTTTATGAAAAAAAAAAAAATTGTTATGAATCAATTCCAAGTTGAAAAAAGAATCGAATATTCATTGATCAAATCATTCACTCCATAGTCTGATCGATCTTTTCTTTTGAAAAACTGATTAATCGGACAAAAATAAAGATAGAGTCCCATTCTACATGTCAATATCAATACCGGCAACAATGAAATTTAAAGTAAGAGGAAAATCCGTCGACTTTAAAAATCGGGAGGGTTCAGGTCCCTCTTATCCCAAACA
>XY15
ATCACTGACTAGCTGCTATTGAGCCCCATCTACAAATGGATAATTCTGTCTTAGTGGAGACGAGTTTTTGAAAATAACGGAGAAATACCGACTCTCTTGCAAGAGAGTCGGTATTTCTCAGTTATTTTTTATGTTTTTCTTTAGTAGTTTTTTATTTCTATCTTTTTTTTACGAAAAGTATTTTTATGCTTTTGCTTTGATTTTGTCTGATATTTTTGTTATGGTTATGGGCTCATATTCGTTATGTACCAGTATAATAATATTAGTTATTTGTTAATCCCACTAATAAAGTTCTAATTTTATTAATTCGATTCTAATTTTCGAATTTTTTAGTTTTTTTAATATAAAATAAAAGAAAAGAGAAAGTTGTAATTTTATGCCTCTTAGATCTTCATTTCTATTTTAATCATTTCTATTTTAAATGGTAGAAATTGAAACCTTTTTATTAAATATTTTATTAAATAGAAATAAAAAAATTTTTAAATCGTGGAGGAAGGGGGGGCGGATGTAGCCAAGTGGATCAAGGCAGTGGATTGTGAATCCACCATGCGCGAGAATAATGGCATGAGCTGGTATGGAACCTACTAAGTGATAACTTTCAAATTCAGAGAAACCCTGGAATCAAAAATGGGCAATCCTGAGCCAAATCCTGTTTTACAAGAACAAACAAGGGTTCAGAAAGCGAAAAAAAAAAAGGGGGATAGGTGCAGAGACTCAACGGAAGCTGTTCTAAAAAATGGGGTTGACTGCCTTTTTTGGTAAAGAAAGGAAAAAAAATCCTTCTATCGAATATCGAAACTCCATAAAGGATGAAGGATAAGCGTATATACACTATGTATACACAATGAAAAACTATCTCAAAAATGACAACCGAATCCGTATTTTTTTTTATGAAAAAAAAAAAAATTGTTATGAATCAATTCCAAGTTGAAAAAAGAATCGAATATTCATTGATCAAATCATTCACTCCATAGTCTGATCGATCTTTTCTTTTGAAAAACTGATTAATCGGACAAAAATAAAAATAGAGTCCCATTCTACATGTCAATATCAATACCGGCAACAATGAAATTTAAAGTAAAAGGAAAATCCGTCAACTTTAAAAATCGGGAGGGTTCAAGTCCTCTTTTCCCCCACA
>XL01
ATTCACAGACTAGCTGCTATTGAGCCCCATCTACAAATGGATAATTCTGTCTTAGTGGAGACGAGTTTTTGAAAATAACGGAGAAATACCGACTCTCTTGCAAGAGAGTCGGTATTTCTCAGTTATTTTTTATGTTTTTCTTTAACAGTTTTTTATTTCTATCTTTTTTTTGGGGCTTTATTTTTAGCCTTTTGCTTGGGAAGTGTTGGATATTTTTGTTATGGTTATCGGCTCATATTCGTTATGTACCAGTATAATAATATTAGTTATTTGTTAATCCCACTAATAAAGTTCTAATTTTATTAATTCGATTCTAATTTTCGAATTTTTTAGTTTTTTTAATATAAAATAAAAGAAAAGAGAAAGTTGTAATTTTATGCCTCTTAGATCTTCATTTCTATTTTAATCATTTCTATTTTAAATGGTAGAAATTGAAACCTTTTTATTAAATATTTTATTAAATAGAAATAAAAAAATTTTTAAATCGTGGAGGAAGGGGGGGCGGATGTAGCCAAGTGGATCAAGGCAGTGGATTGTGAATCCACCATGCGCGAGGGATGCATGAGCTGGTATGGACCTACTAAGTGATAACTTTCAAATTCAGAGAAACCCTGGAATCAAAAATGGGCAATCCTGAGCCAAATCCTGTTTTACAAGAACAAACAAGGGTTCAGAAAGCGAAAAAAAAAAAGGGGGATAGGGGCAGAAACTCAACGGAAGCTGTTCTAAGAAATGGGGTTGACTGCCTTTTTTGGTAAAGAAAGGAAAAAAAATCCTTCTATCGAATATCGAAACTCCATAAAGGATGAAGGATAAGCGTATATACACTATGTATACACAATGAAAAACTATCTCAAAAATGACAACCGAATCCGTATTTTTTTTTATGAAAAAAAAAAAAATTGTTATGAATCAATTCCAAGTTGAAAAAAAAATCGAATATTCATTGATCAAATCATTCACTCCATAGTCTGATCGATCTTTTCTTTTGAAAAACTGATTAATCGGACAAAAATAAAAATAGAGTCCCATTCTACATGTCAATATCAATACCGGCAACAATGAAATTTAGAGTAAGAGGAAAATCCGTCAACTTTAGAAATCGGGAGGGTTCAAGTCCCTCCTATCCCCA
>XL02
TCCCTGACTAGCTGCTATTGAGCCCCATCTACAAATGGATAATTCTGTCTTAGTGGAGACGAGTTTTTGAAAATAACGGAGAAATACCGACTCTCTTGCAAGAGAGTCGGTATTTCTCCGTTATTTTTTATGTTTTTCTTTAGTAGTTTTTTATTTCTATCTTTTTTTTACGGGCAGTATTTTTATGCTTTTGCTTTGATTTTGTCTGATATTTTTGTTATGGTTATGGGCTCATATTCGTTATGTACCAGTATAATAATATTAGTTATTTGTTAATCCCACTAATAAAGTTCTAATTTTATTAATTCGATTCTAATTTTCGAATTTTTTAGTTTTTTTAATATAAAATAAAAGAAAAGAGAAAGTTGTAATTTTATGCCTCTTAGATCTTCATTTCTATTTTAATCATTTCTATTTTAAATGGTAGAAATTGAAACCTTTTTATTAAATATTTTATTAAATAGAAATAAAAAAATTTTTAAATCGTGGAGGAAGGGGGGGCGGATGTAGCCAAGTGGATCAAGGCAGTGGATTGTGAATCCACCACACGCGAGGAGCGCGATGCATGAGCTGGTATGGAACCTACTAAGTGATAACTTTCAAATTCAGAGAAACCCTGGAATCAAAAATGGGCAATCCTGAGCCAAATCCTGTTTTACAAGAACAAACAAGGGTTCAGAAAGCGAAAAAAAAAAAGGGGGATAGGTGCAAAGACTCAACGGAAGCTGTTCTAAAAAATGGGGTTGACTGCCTTTTTTGGTAAAGAAAGGAAAAAAAATCCTTCTATCGAATATCGAAACTCCATAAAGGATGAAGGATAAGCGTATATACACTATGTATACACAATGAAAAACTATCTCAAAAATGACAACCGAATCCGTATTTTTTTTTATGAAAAAAAAAAAAATTGTTATGAATCAATTCCAAGTTGAAAAAAGAATCGAATATTCATTGATCAAATCATTCACTCCATAGTCTGATCGATCTTTTCTTTTGAAAAACTGATTAATCGGACAAAAATAAAAATAGAGTCCCATTCTACATGTCAATATCAATACCGGCAACAATGAAATTTAAAGTAAAAGGAAAATCCGTCGACTTTAAAAATCGTGAGGGTTCAAGTCCTCTTTTCCCCCAAA
>XL03
ATCACTGACTAGCTGCTATTGAGCCCCATCTACAAATGGATAATTCTGTCTTAGTGGAGACGAGTTTTTGAAAATAACGGAGAAATACCGACTCTCTTGCAAGAGAGTCGGTATTTCTCCGTTATTTTTTATGTTTTTCTTTAGTAGTTTTTTATTTCTATCTTTTTTTTACGAAAAGTATTTTTATGCTTTTGCTTTGATTTTGTCTGATATTTTTGTTATGGTTATGGGCTCATATTCGTTATGTACCAGTATAATAATATTAGTTATTTGTTAATCCCACTAATAAAGTTCTAATTTTATTAATTCGATTCTAATTTTCGAATTTTTTAGTTTTTTTAATATAAAATAAAAGAAAAGAGAAAGTTGTAATTTTATGCCTCTTAGATCTTCATTTCTATTTTAATCATTTCTATTTTAAATGGTAGAAATTGAAACCTTTTTATTAAATATTTTATTAAATAGAAATAAAAAAATTTTTAAATCGTGGAGGAAGGGGGGGCGGATGTAGCCAAGTGGATCAAGGCAGTGGATTGTGAATCCACCAAACGCGAGAAGTGCATGGCATGAGCTTGGTATGGAACCTACTAAGTGATAACTTTCAAATTCAGAGAAACCCTGGAATCAAAAATGGGCAATCCTGAGCCAAATCCTGTTTTACAAGAACAAACAAGGGTTCAGAAAGCGAAAAAAAAAAAGGGGGATAGGTGCAAAGACTCAACGGAAGCTGTTCTAAAAAATGGGGTTGACTGCCTTTTTTGGTAAAAAAAGGAAAAAAAATCCTTCTATCGAATATCGAAACTCCATAAAGGATGAAGGATAAGCGTATATACACTATGTATACACAATGAAAAACTATCTCAAAAATGACAACCGAATCCGTATTTTTTTTTATGAAAAAAAAAAAAATTGTTATGAATCAATTCCAAGTTGAAAAAAGAATCGAATATTCATTGATCAAATCATTCACTCCATAGTCTGATCGATCTTTTCTTTTGAAAAACTGATTAATCGGACAAAAATAAAAATAGAGTCCCATTCTACATGTCAATATCAATACCGGCAACAATGAAATTTAAAGTAAAAGGAAAATCCGTCAACTTTAAAAATCGTGAGGGTTCAAGTCCTCCTTTTCCCCAA
>XL05
ATCTCTGACTAGCTGCTATTGAGCCCCATCTACAAATGGATAATTCTGTCTTAGTGGAGACGAGTTTTTGAAAATAACGGAGAAATACCGACTCTCTTGCAAGAGAGTCGGTATTTCTCAGTTATTTTTTATGTTTTTCTTTAGTAGTTTTTTATTTCTATCTTTTTTTTACGGGCAGTATTTTTATGCTTTTGCTTTGATTTTGTCTGATATTTTTGTTATGGTTATGGGCTCATATTCGTTATGTACCAGTATAATAATATTAGTTATTTGTTAATCCCACTAATAAAGTTCTAATTTTATTAATTCGATTCTAATTTTCGAATTTTTTAGTTTTTTTAATATAAAATAAAAGAAAAGAGAAAGTTGTAATTTTATGCCTCTTAGATCTTCATTTCTATTTTAATCATTTCTATTTTAAATGGTAGAAATTGAAACCTTTTTATTAAATATTTTATTAAATAGAAATAAAAAAATTTTTAAATCGTGGAGGAAGGGGGGGCGGATGTAGCCAAGTGGATCAAGGCAGTGGATTGTGAATCCACCAAACGCGACGAGATGCATGAGCTTGGTATGGAACCTACTAAGTGATAACTTTCAAATTCAGAGAAACCCTGGAATCAAAAATGGGCAATCCTGAGCCAAATCCTGTTTTACAAGAACAAACAAGGGTTCAGAAAGCGAAAAAAAAAAAGGGGGATAGGTGCAAAAACTCAACGGAAGCTGTTCTAAAAAATGGGGTTGACTGCCTTTTTTGGTAAAAAAAGGAAAAAAAATCCTTCTATCGAATATCGAAACTCCATAAAGGATGAAGGATAAGCGTATATACACTATGTATACACAATGAAAAACTATCTCAAAAATGACAACCGAATCCGTATTTTTTTTTATGAAAAAAAAAAAAATTGTTATGAATCAATTCCAAGTTGAAAAAAGAATCGAATATTCATTGATCAAATCATTCACTCCATAGTCTGATCGATCTTTTCTTTTGAAAAACTGATTAATCGGACAAAAATAAAGATAGAGTCCCATTCTACATGTCAATATCAATACCGGCAACAATGAAATTTAAAGTAAGAGGAAAATCCGTCGACTTTAAAAATCGTGAGGGTTCAAGTCCTTTTTTCCCCA
>XL06
ATCACTGACTAGCTGCTATTGAGCCCCATCTACAAATGGATAATTCTGTCTTAGTGGAGACGAGTTTTTGAAAATAACGGAGAAATACCGACTCTCTTGCAAGAGAGTCGGTATTTCTCCGTTATTTTTTATGTTTTTCTTTAGTAGTTTTTTATTTCTATCTTTTTTTTACGAAAAGTATTTTTATGCTTTTGCTTTGATTTTGTCTGATATTTTTGTTATGGTTATGGGCTCATATTCGTTATGTACCAGTATAATAATATTAGTTATTTGTTAATCCCACTAATAAAGTTCTAATTTTATTAATTCGATTCTAATTTTCGAATTTTTTAGTTTTTTTAATATAAAATAAAAGAAAAGAGAAAGTTGTAATTTTATGCCTCTTAGATCTTCATTTCTATTTTAATCATTTCTATTTTAAATGGTAGAAATTGAAACCTTTTTATTAAATATTTTATTAAATAGAAATAAAAAAATTTTTAAATCGTGGAGGAAGGGGGGGCGGATGTAGCCAAGTGGATCAAGGCAGTGGATTGTGAATCCACCAAACGCGAGGAAGCATGCATGAGCTTGGTATGGAACCTACTAAGTGATAACTTTCAAATTCAGAGAAACCCTGGAATCAAAAATGGGCAATCCTGAGCCAAATCCTGTTTTACAAGAACAAACAAGGGTTCAGAAAGCGAAAAAAAAAAAGGGGGATAGGTGCAAAGACTCAACGGAAGCTGTTCTAAAAAATGGGGTTGACTGCCTTTTTTGGTAAAAAAAGGAAAAAAAATCCTTCTATCGAATATCGAAACTCCATAAAGGATGAAGGATAAGCGTATATACACTATGTATACACAATGAAAAACTATCTCAAAAATGACAACCGAATCCGTATTTTTTTTTATGAAAAAAAAAAAAATTGTTATGAATCAATTCCAAGTTGAAAAAAGAATCGAATATTCATTGATCAAATCATTCACTCCATAGTCTGATCGATCTTTTCTTTTGAAAAACTGATTAATCGGACAAAAATAAAGATAGAGTCCCATTCTACATGTCAATATCAATACCGGCAACAATGAAATTTAAAGTAAGAGGAAAATCCGTCAACTTTAAAAATCGTGAGGGTTCAAGTCTTCCTTTTCCCCAA
>XL07
AATTTCTCTGACTAGCTGCTATTGAGCCCCATCTACAAATGGATAATTCTGTCTTAGTGGAGACGAGTTTTTGAAAATAACGGAGAAATACCGACTCTCTTGCAAGAGAGTCGGTATTTCTCAGTTATTTTTTATGTTTTTCTTTAGTAGTTTTTTATTTCTATCTTTTTTTTACGGGCAGTATTTTTATGCTTTTGCTTTGATTTTGTCTGATATTTTTGTTATGGTTATGGGCTCATATTCGTTATGTACCAGTATAATAATATTAGTTATTTGTTAATCCCACTAATAAAGTTCTAATTTTATTAATTCGATTCTAATTTTCGAATTTTTTAGTTTTTTTAATATAAAATAAAAGAAAAGAGAAAGTTGTAATTTTATGCCTCTTAGATCTTCATTTCTATTTTAATCATTTCTATTTTAAATGGTAGAAATTGAAACCTTTTTATTAAATATTTTATTAAATAGAAATAAAAAAATTTTTAAATCGTGGAGGAAGGGGGGGCGGATGTAGCCAAGTGGATCAAGGCAGTGGATTGTGAATCCACCAAACGCGACGAACATTGGTTGGCTTGGTATGGAACCTACTAAGTGATAACTTTCAAATTCAGAGAAACCCTGGAATCAAAAATGGGCAATCCTGAGCCAAATCCTGTTTTACAAGAACAAACAAGGGTTCAGAAAGCGAAAAAAAAAAAGGGGGATAGGTGCAGAGACTCAACGGAAGCTGTTCTAAAAAATGGGGTTGACTGCCTTTTTTGGTAAAAAAAGGAAAAAAAATCCTTCTATCGAATATCGAAACTCCATAAAGGATGAAGGATAAGCGTATATACACTATGTATACACAATGAAAAACTATCTCAAAAATGACAACCGAATCCGTATTTTTTTTTATGAAAAAAAAAAAAATTGTTATGAATCAATTCCAAGTTGAAAAAAGAATCGAATATTCATTGATCAAATCATTCACTCCATAGTCTGATCGATCTTTTCTTTTGAAAAACTGATTAATCGGACAAAAATAAAGATAGAGTCCCATTCTACATGTCAATATCAATACCGGCAACAATGAAATTTAAAGTAAGAGGAAAATCCGTCGACTTTAAAAATCGGGAGGGTTCAAGTCCTTCTTATCCCCAA
>XL08
GCACAGACTAGCTGCTATTGAGCCCCATCTACAAATGGATAATTCTGTCTTAGTGGAGACGAGTTTTTGAAAATAACGGAGAAATACCGACTCTCTTGCAAGAGAGTCGGTATTTCTCCGTTATTTTTTATGTTTTTCTTTAGTAGTTTTTTATTTCTATCTTTTTTTTACGAAAAGTATTTTTATGCTTTTGCTTTGATTTTGTCTGATATTTTTGTTATGGTTATGGGCTCATATTCGTTATGTACCAGTATAATAATATTAGTTATTTGTTAATCCCACTAATAAAGTTCTAATTTTATTAATTCGATTCTAATTTTCGAATTTTTTAGTTTTTTTAATATAAAATAAAAGAAAAGAGAAAGTTGTAATTTTATGCCTCTTAGATCTTCATTTCTATTTTAATCATTTCTATTTTAAATGGTAGAAATTGAAACCTTTTTATTAAATATTTTATTAAATAGAAATAAAAAAATTTTTAAATCGTGGAGGAAGGGGGGGCGGATGTAGCCAAGTGGATCAAGGCAGTGGATTGTGAATCCACCAAACGCGACGACGCATGCTGAGCTGGTATGGAACCTACTAAGTGATAACTTTCAAATTCAGAGAAACCCTGGAATCAAAAATGGGCAATCCTGAGCCAAATCCTGTTTTACAAGAACAAACAAGGGTTCAGAAAGCGAAAAAAAAAAAGGGGGATAGGTGCAGAGACTCAACGGAAGCTGTTCTAAAAAATGGGGTTGACTGCCTTTTTTGGTAAAGAAAGGAAAAGAAATCCTTCTATCGAATATCGAAACTCCATAAAGGATGAAGGATAAGCGTATATACACTATGTATACACAATGAAAAACTATCTCAAAAATGACAACCGAATCCGTATTTTTTTTTATGAAAAAAAAAAAAATTGTTATGAATCAATTCCAAGTTGAAAAAAGAATCGAATATTCATTGATCAAATCATTCACTCCATAGTCTGATCGATCTTTTCTTTTGAAAAACTGATTAATCGGACAAAAATAAAGATAGAGTCCCATTCTACATGTCAATATCAATACCGGCAACAATGAAATTTAAAGTAAGAGGAAAATCCGTCGACTTTAAAAATCGTGAGGGTTCAAGTCTTTTTTTCCCCAAAACG
>XL09
GATCTTTGACTGCTGCTATTGAGCCCCATCTACAAATGGATAATTCTGTCTTAGTGGAGACGAGTTTTTGAAAATAACGGAGAAATACCGACTCTCTTGCAAGAGAGTCGGTATTTCTCCGTTATTTTTTATGTTTTTCTTTAGTAGTTTTTTATTTCTATCTTTTTTTTACGAAAAGTATTTTTATGCTTTTGCTTTGATTTTGTCTGATATTTTTGTTATGGTTATGGGCTCATATTCGTTATGTACCAGTATAATAATATTAGTTATTTGTTAATCCCACTAATAAAGTTCTAATTTTATTAATTCGATTCTAATTTTCGAATTTTTTAGTTTTTTTAATATAAAATAAAAGAAAAGAGAAAGTTGTAATTTTATGCCTCTTAGATCTTCATTTCTATTTTAATCATTTCTATTTTAAATGGTAGAAATTGAAACCTTTTTATTAAATATTTTATTAAATAGAAATAAAAAAATTTTTAAATCGTGGAGGAAGGGGGGGCGGATGTAGCCAAGTGGATCAAGGCAGTGGATTGTGAATCCACCAAACGCGAGAATCATGGCATGAGCTTGGTATGGAACCTACTAAGTGATAACTTTCAAATTCAGAGAAACCCTGGAATCAAAAATGGGCAATCCTGAGCCAAATCCTGTTTTACAAGAACAAACAAGGGTTCAGAAAGCGAAAAAAAAAAAGGGGGATAGGTGCAAAGACTCAACGGAAGCTGTTCTAAAAAATGGGGTTGACTGCCTTTTTTGGTAAAAAAAGGAAAAAAAATCCTTCTATCGAATATCGAAACTCCATAAAGGATGAAGGATAAGCGTATATACACTATGTATACACAATGAAAAACTATCTCAAAAATGACAACCGAATCCGTATTTTTTTTTATGAAAAAAAAAAAAATTGTTATGAATCAATTCCAAGTTGAAAAAAGAATCGAATATTCATTGATCAAATCATTCACTCCATAGTCTGATCGATCTTTTCTTTTGAAAAACTGATTAATCGGACAAAAATAAAGATAGAGTCCCATTCTACATGTCAATATCAATACCGGCAACAATGAAATTTAAAGTAAGAGGAAAATCCGTCGACTTTAAAAATCGTGAGGGTTCAAGTCTTTCTTATCCCCCAA
>XL10
AATCACTGACTAGCTGCTATTGAGCCCCATCTACAAATGGATAATTCTGTCTTAGTGGAGACGAGTTTTTGAAAATAACGGAGAAATACCGACTCTCTTGCAAGAGAGTCGGTATTTCTCAGTTATTTTTTATGTTTTTCTTTAGTAGTTTTTTATTTCTATCTTTTTTTTACGAAAAGTATTTTTATGCTTTTGCTTTGATTTTGTCTGATATTTTTGTTATGGTTATGGGCTCATATTCGTTATGTACCAGTATAATAATATTAGTTATTTGTTAATCCCACTAATAAAGTTCTAATTTTATTAATTCGATTCTAATTTTCGAATTTTTTAGTTTTTTTAATATAAAATAAAAGAAAAGAGAAAGTTGTAATTTTATGCCTCTTAGATCTTCATTTCTATTTTAATCATTTCTATTTTAAATGGTAGAAATTGAAACCTTTTTATTAAATATTTTATTAAATAGAAATAAAAAAATTTTTAAATCGTGGAGGAAGGGGGGGCGGATGTAGCCAAGTGGATCAAGGCAGTGGATTGTGAATCCACCAAACGCGAGGTTGCATGAGCTGGTATGGAACCTACTAAGTGATAACTTTCAAATTCAGAGAAACCCTGGAATCAAAAATGGGCAATCCTGAGCCAAATCCTGTTTTACAAGAACAAACAAGGGTTCAGAAAGCGAAAAAAAAAAAGGGGGATAGGTGCAGAGACTCAACGGAAGCTGTTCTAAAAAATGGGGTTGACTGCCTTTTTTGGTAAAGAAAGGAAAAGAAATCCTTCTATCGAATATCGAAACTCCATAAAGGATGAAGGATAAGCGTATATACACTATGTATACACAATGAAAAACTATCTCAAAAATGACAACCGAATCCGTATTTTTTTTTATGAAAAAAAAAAAAATTGTTATGAATCAATTCCAAGTTGAAAAAAGAATCGAATATTCATTGATCAAATCATTCACTCCATAGTCTGATCGATCTTTTCTTTTGAAAAACTGATTAATCGGACAAAAATAAAGATAGAGTCCCATTCTACATGTCAATATCAATACCGGCAACAATGAAATTTAAAGTAAGAGGAAAATCCGTCGACTTTAAAAATCGGGAGGGTTCAAGTCCCCTTTTCCCCAAA
>XL11
ATCATTGACTAGCTGCTATTGAGCCCCATCTACAAATGGATAATTCTGTCTTAGTGGAGACGAGTTTTTGAAAATAACGGAGAAATACCGACTCTCTTGCAAGAGAGTCGGTATTTCTCCGTTATTTTTTATGTTTTTCTTTAGTAGTTTTTTATTTCTATCTTTTTTTTGGGGCAGTATTTTTATGCTTTTGCTTTGGAAGTGTCGGATATTTTTGTTATGGTTATGGGCTCATATTCGTTATGTACCAGTATAATAATATTAGTTATTTGTTAATCCCACTAATAAAGTTCTAATTTTATTAATTCGATTCTAATTTTCGAATTTTTTAGTTTTTTTAATATAAAATAAAAGAAAAGAGAAAGTTGTAATTTTATGCCTCTTAGATCTTCATTTCTATTTTAATCATTTCTATTTTAAATGGAATAAATTGAAACCTTTTTATTAAATATTTTATTAAATAGAAATAAAAAAATTTTTAAATCGTGGAGGAAGGGGGGGCGGATGTAGCCAAGTGGATCAAGGCAGTGGATTGTGAATCCACCACACGCGACGAGCATGCCATGAGCCTTGGTATGGAACCTACTAAGTGATAACTTTCAAATTCAGAGAAACCCTGGAATCAAAAATGGGCAATCCTGAGCCAAATCCTGTTTTACAAGAACAAACAAGGGTTCAGAAAGCGAAAAAAAAAAAGGGGGATAGGTGCAAAAACTCAACGGAAGCTGTTCTAAAAAATGGGGTTGACTGCCTTTTTTGGTAAAAAAAGGAAAAAAAATCCTTCTATCGAATATCGAAACTCCATAAAGGATGAAGGATAAGCGTATATACACTATGTATACACAATGAAAAACTATCTCAAAAATGACAACCGAATCCGTATTTTTTTTTATGAAAAAAAAAAAAATTGTTATGAATCAATTCCAAGTTGAAAAAAGAATCGAATATTCATTGATCAAATCATTCACTCCATAGTCTGATCGATCTTTTCTTTTGAAAAACTGATTAATCGGACAAAAATAAAGATAGAGTCCCATTCTACATGTCAATATCAATACCGGCAACAATGAAATTTAAAGTAAGAGGAAAATCCGTCGACTTTAAAAATCGGGAGGGTTCAAGTCCTTTTTATCCCCAAA
>XL12
ATCTCTGACTAGCTGCTATTGAGCCCCATCTACAAATGGATAATTCTGTCTTAGTGGAGACGAGTTTTTGAAAATAACGGAGAAATACCGACTCTCTTGCAAGAGAGTCGGTATTTCTCCGTTATTTTTTATGTTTTTCTTTAGTAGTTTTTTATTTCTATCTTTTTTTTACGAAAAGTATTTTTATGCTTTTGCTTTGATTTTGTCTGATATTTTTGTTATGGTTATGGGCTCATATTCGTTATGTACCAGTATAATAATATTAGTTATTTGTTAATCCCACTAATAAAGTTCTAATTTTATTAATTCGATTCTAATTTTCGAATTTTTTAGTTTTTTTAATATAAAATAAAAGAAAAGAGAAAGTTGTAATTTTATGCCTCTTAGATCTTCATTTCTATTTTAATCATTTCTATTTTAAATGGTAGAAATTGAAACCTTTTTATTAAATATTTTATTAAATAGAAATAAAAAAATTTTTAAATCGTGGAGGAAGGGGGGGCGGATGTAGCCAAGTGGATCAAGGCAGTGGATTGTGAATCCACCAACCGCGACGATTGGGCATGAGCTTGGTATGGAACCTACTAAGTGATAACTTTCAAATTCAGAGAAACCCTGGAATCAAAAATGGGCAATCCTGAGCCAAATCCTGTTTTACAAGAACAAACAAGGGTTCAGAAAGCGAAAAAAAAAAAGGGGGATAGGTGCAGAGACTCAACGGAAGCTGTTCTAAAAAATGGGGTTGACTGCCTTTTTTGGTAAAAAAAGGAAAAAAAATCCTTCTATCGAATATCGAAACTCCATAAAGGATGAAGGATAAGCGTATATACACTATGTATACACAATGAAAAACTATCTCAAAAATGACAACCGAATCCGTATTTTTTTTTATGAAAAAAAAAAAAATTGTTATGAATCAATTCCAAGTTGAAAAAAGAATCGAATATTCATTGATCAAATCATTCACTCCATAGTCTGATCGATCTTTTCTTTTGAAAAACTGATTAATCGGACAAAAATAAAAATAGAGTCCCATTCTACATGTCAATATCAATACCGGCAACAATGAAATTTAAAGTAAAAGGAAAATCCGTCAACTTTAAAAATCGTGAGGGTTCAAGTCCTTTTTATCCCCCAA
>XL13
ATCACTGACTAGCTGCTATTGAGCCCCATCTACAAATGGATAATTCTGTCTTAGTGGAGACGAGTTTTTGAAAATAACGGAGAAATACCGACTCTCTTGCAAGAGAGTCGGTATTTCTCCGTTATTTTTTATGTTTTTCTTTAGTAGTTTTTTATTTCTATCTTTTTTTTACGAAAAGTATTTTTATGCTTTTGCTTTGATTTTGTCTGATATTTTTGTTATGGTTATGGGCTCATATTCGTTATGTACCAGTATAATAATATTAGTTATTTGTTAATCCCACTAATAAAGTTCTAATTTTATTAATTCGATTCTAATTTTCGAATTTTTTAGTTTTTTTAATATAAAATAAAAGAAAAGAGAAAGTTGTAATTTTATGCCTCTTAGATCTTCATTTCTATTTTAATCATTTCTATTTTAAATGGTAGAAATTGAAACCTTTTTATTAAATATTTTATTAAATAGAAATAAAAAAATTTTTAAATCGTGGAGGAAGGGGGGGCGGATGTAGCCAAGTGGATCAAGGCAGTGGATTGTGAATCCACCAAACGCGAGAAACTGATGGCATGAGCTTGGTATGGAACCTACTAAGTGATAACTTTCAAATTCAGAGAAACCCTGGAATCAAAAATGGGCAATCCTGAGCCAAATCCTGTTTTACAAGAACAAACAAGGGTTCAGAAAGCGAAAAAAAAAAAGGGGGATAGGTGCAGAGACTCAACGGAAGCTGTTCTAAAAAATGGGGTTGACTGCCTTTTTTGGTAAAGAAAGGAAAAGAAATCCTTCTATCGAATATCGAAACTCCATAAAGGATGAAGGATAAGCGTATATACACTATGTATACACAATGAAAAACTATCTCAAAAATGACAACCGAATCCGTATTTTTTTTTATGAAAAAAAAAAAAATTGTTATGAATCAATTCCAAGTTGAAAAAAGAATCGAATATTCATTGATCAAATCATTCACTCCATAGTCTGATCGATCTTTTCTTTTGAAAAACTGATTAATCGGACAAGAATAAAGATAGAGTCCCATTCTACATGTCAATATCAATACCGGCAACAATGAAATTTAAAGTAAGAGGAAAATCCGTCGACTTTAAAAATCGTGAGGGTTCAAGTCTTTCTTATCCCCCAA
>XL14
ACTCACTGACTAGCTGCTATTGAGCCCCATCTACAAATGGATAATTCTGTCTTAGTGGAGACGAGTTTTTGAAAATAACGGAGAAATACCGACTCTCTTGCAAGAGAGTCGGTATTTCTCCGTTATTTTTTATGTTTTTCTTTAGTAGTTTTTTATTTCTATCTTTTTTTTACGGGCAGTATTTTTATGCTTTTGCTTTGATTTTGTCTGATATTTTTGTTATGGTTATGGGCTCATATTCGTTATGTACCAGTATAATAATATTAGTTATTTGTTAATCCCACTAATAAAGTTCTAATTTTATTAATTCGATTCTAATTTTCGAATTTTTTAGTTTTTTTAATATAAAATAAAAGAAAAGAGAAAGTTGTAATTTTATGCCTCTTAGATCTTCATTTCTATTTTAATCATTTCTATTTTAAATGGTAGAAATTGAAACCTTTTTATTAAATATTTTATTAAATAGAAATAAAAAAATTTTTAAATCGTGGAGGAAGGGGGGGCGGATGTAGCCAAGTGGATCAAGGCAGTGGATTGTGAATCCACCAAACGCGAGGATTGCATGAGCTTGGTATGGAACCTACTAAGTGATAACTTTCAAATTCAGAGAAACCCTGGAATCAAAAATGGGCAATCCTGAGCCAAATCCTGTTTTACAAGAACAAACAAGGGTTCAGAAAGCGAAAAAAAAAAAGGGGGATAGGTGCAGAGACTCAACGGAAGCTGTTCTAAGAAATGGGGTTGACTGCCTTTTTTGGTAAAAAAAGGAAAAAAAATCCTTCTATCGAATATCGAAACTCCATAAAGGATGAAGGATAAGCGTATATACACTATGTATACACAATGAAAAACTATCTCAAAAATGACAACCGAATCCGTATTTTTTTTTATGAAAAAAAAAAAAATTGTTATGAATCAATTCCAAGTTGAAAAAAGAATCGAATATTCATTGATCAAATCATTCACTCCATAGTCTGATCGATCTTTTCTTTTGAAAAACTGATTAATCGGACAAAAATAAAGATAGAGTCCCATTCTACATGTCAATATCAATACCGGCAACAATGAAATTTAAAGTAAGAGGAAAATCCGTCGACTTTAAAAATCGTGAGGGTTCAAGCCTCTTTTCCCCAA
>XL15
ATCTCTGACTAGCTGCTATTGAGCCCCATCTACAAATGGATAATTCTGTCTTAGTGGAGACGAGTTTTTGAAAATAACGGAGAAATACCGACTCTCTTGCAAGAGAGTCGGTATTTCTCCGTTATTTTTTATGTTTTTCTTTAGTAGTTTTTTATTTCTATCTTTTTTTTACGAAAAGTATTTTTATGCTTTTGCTTTGATTTTGTCTGATATTTTTGTTATGGTTATGGGCTCATATTCGTTATGTACCAGTATAATAATATTAGTTATTTGTTAATCCCACTAATAAAGTTCTAATTTTATTAATTCGATTCTAATTTTCGAATTTTTTAGTTTTTTTAATATAAAATAAAAGAAAAGAGAAAGTTGTAATTTTATGCCTCTTAGATCTTCATTTCTATTTTAATCATTTCTATTTTAAATGGTAGAAATTGAAACCTTTTTATTAAATATTTTATTAAATAGAAATAAAAAAATTTTTAAATCGTGGAGGAAGGGGGGGCGGATGTAGCCAAGTGGATCAAGGCAGTGGATTGTGAATCCACCAAACGCGACGAAGGCATGCATGAGCTTGGTATGGAACCTACTAAGTGATAACTTTCAAATTCAGAGAAACCCTGGAATCAAAAATGGGCAATCCTGAGCCAAATCCTGTTTTACAAGAACAAACAAGGGTTCAGAAAGCGAAAAAAAAAAAGGGGGATAGGTGCAAAGACTCAACGGAAGCTGTTCTAAAAAATGGGGTTGACTGCCTTTTTTGGTAAAGAAAGGAAAAGAAATCCTTCTATCGAATATCGAAACTCCATAAAGGATGAAGGATAAGCGTATATACACTATGTATACACAATGAAAAACTATCTCAAAAATGACAACCGAATCCGTATTTTTTTTTATGAAAAAAAAAAAAATTGTTATGAATCAATTCCAAGTTGAAAAAAGAATCGAATATTCATTGATCAAATCATTCACTCCATAGTCTGATCGATCTTTTCTTTTGAAAAACTGATTAATCGGACAAAAATAAAAATAGAGTCCCATTCTACATGTCAATATCAATACCGGCAACAATGAAATTTAAAGTAAAAGGAAAATCCGTCGACTTTAAAAATCGTGAGGGTTCAAGTCTCCCTTTTTCCCCCAA
>XL16
AATCTTGACTAGCTGCTATTGAGCCCCATCTACAAATGGATAATTCTGTCTTAGTGGAGACGAGTTTTTGAAAATAACGGAGAAATACCGACTCTCTTGCAAGAGAGTCGGTATTTCTCCGTTATTTTTTATGTTTTTCTTTAGTAGTTTTTTATTTCTATCTTTTTTTTACGAAAAGTATTTTTATGCTTTTGCTTTGATTTTGTCTGATATTTTTGTTATGGTTATGGGCTCATATTCGTTATGTACCAGTATAATAATATTAGTTATTTGTTAATCCCACTAATAAAGTTCTAATTTTATTAATTCGATTCTAATTTTCGAATTTTTTAGTTTTTTTAATATAAAATAAAAGAAAAGAGAAAGTTGTAATTTTATGCCTCTTAGATCTTCATTTCTATTTTAATCATTTCTATTTTAAATGGTAGAAATTGAAACCTTTTTATTAAATATTTTATTAAATAGAAATAAAAAAATTTTTAAATCGTGGAGGAAGGGGGGGCGGATGTAGCCAAGTGGATCAAGGCAGTGGATTGTGAATCCACCAAACGCGAAGAGGCATGCATGAGCTTGGTATGGAACCTACTAAGTGATAACTTTCAAATTCAGAGAAACCCTGGAATCAAAAATGGGCAATCCTGAGCCAAATCCTGTTTTACAAGAACAAACAAGGGTTCAGAAAGCGAAAAAAAAAAAGGGGGATAGGTGCAGAGACTCAACGGAAGCTGTTCTAAGAAATGGGGTTGACTGCCTTTTTTGGTAAAGAAAGGAAAAGAAATCCTTCTATCGAATATCGAAACTCCATAAAGGATGAAGGATAAGCGTATATACACTATGTATACACAATGAAAAACTATCTCAAAAATGACAACCGAATCCGTATTTTTTTTTATGAAAAAAAAAAAAATTGTTATGAATCAATTCCAAGTTGAAAAAAGAATCGAATATTCATTGATCAAATCATTCACTCCATAGTCTGATCGATCTTTTCTTTTGAAAAACTGATTAATCGGACAAAAATAAAGATAGAGTCCCATTCTACATGTCAATATCAATACCGGCAACAATGAAATTTAAAGTAAGAGGAAAATCCGTCGACTTTAAAAATCGTGAGGGTTCAAGTCTTTTTTTTCCCCAAAATC
>XL17
ATCACAGACTAGCTGCTATTGAGCCCCATCTACAAATGGATAATTCTGTCTTAGTGGAGACGAGTTTTTGAAAATAACGGAGAAATACCGACTCTCTTGCAAGAGAGTCGGTATTTCTCCGTTATTTTTTATGTTTTTCTTTAGTAGTTTTTTATTTCTATCTTTTTTTTACGAAAAGTATTTTTATGCTTTTGCTTTGATTTTGTCTGATATTTTTGTTATGGTTATGGGCTCATATTCGTTATGTACCAGTATAATAATATTAGTTATTTGTTAATCCCACTAATAAAGTTCTAATTTTATTAATTCGATTCTAATTTTCGAATTTTTTAGTTTTTTTAATATAAAATAAAAGAAAAGAGAAAGTTGTAATTTTATGCCTCTTAGATCTTCATTTCTATTTTAATCATTTCTATTTTAAATGGTAGAAATTGAAACCTTTTTATTAAATATTTTATTAAATAGAAATAAAAAAATTTTTAAATCGTGGAGGAAGGGGGGGCGGATGTAGCCAAGTGGATCAAGGCAGTGGATTGTGAATCCACCAAACGCGAAAAAGGATGCATGAGCTGGTATGGAACCTACTAAGTGATAACTTTCAAATTCAGAGAAACCCTGGAATCAAAAATGGGCAATCCTGAGCCAAATCCTGTTTTACAAGAACAAACAAGGGTTCAGAAAGCGAAAAAAAAAAAGGGGGATAGGTGCAGAGACTCAACGGAAGCTGTTCTAAAAAATGGGGTTGACTGCCTTTTTTGGTAAAGAAAGGAAAAAAAATCCTTCTATCGAATATCGAAACTCCATAAAGGATGAAGGATAAGCGTATATACACTATGTATACACAATGAAAAACTATCTCAAAAATGACAACCGAATCCGTATTTTTTTTTATGAAAAAAAAAAAAATTGTTATGAATCAATTCCAAGTTGAAAAAAGAATCGAATATTCATTGATCAAATCATTCACTCCATAGTCTGATCGATCTTTTCTTTTGAAAAACTGATTAATCGGACAAAAATAAAGATAGAGTCCCATTCTACATGTCAATATCAATACCGGCAACAATGAAATTTAAAGTAAGAGGAAAATCCGTCGACTTTAAAAATCGTGAGGGTTCAAGTCTCCTCTTATCCCCCAA
>XL18
ATCTTGACTAGCTGCTATTGAGCCCCATCTACAAATGGATAATTCTGTCTTAGTGGAGACGAGTTTTTGAAAATAACGGAGAAATACCGACTCTCTTGCAAGAGAGTCGGTATTTCTCCGTTATTTTTTATGTTTTTCTTTAGTAGTTTTTTATTTCTATCTTTTTTTTACGGGCAGTATTTTTATGCTTTTGCTTTGATTTTGTCTGATATTTTTGTTATGGTTATGGGCTCATATTCGTTATGTACCAGTATAATAATATTAGTTATTTGTTAATCCCACTAATAAAGTTCTAATTTTATTAATTCGATTCTAATTTTCGAATTTTTTAGTTTTTTTAATATAAAATAAAAGAAAAGAGAAAGTTGTAATTTTATGCCTCTTAGATCTTCATTTCTATTTTAATCATTTCTATTTTAAATGGTAGAAATTGAAACCTTTTTATTAAATATTTTATTAAATAGAAATAAAAAAATTTTTAAATCGTGGAGGAAGGGGGGGCGGATGTAGCCAAGTGGATCAAGGCAGTGGATTGTGAATCCACCAAACGCGAGGAGCATTACTTTCCGGATGCATGAGCTTGGTATGGAACCTACTAAGTGATAACTTTCAAATTCAGAGAAACCCTGGAATCAAAAATGGGCAATCCTGAGCCAAATCCTGTTTTACAAGAACAAACAAGGGTTCAGAAAGCGAAAAAAAAAAAGGGGGATAGGTGCAAAGACTCAACGGAAGCTGTTCTAAAAAATGGGGTTGACTGCCTTTTTTGGTAAAGAAAGGAAAAGAAATCCTTCTATCGAATATCGAAACTCCATAAAGGATGAAGGATAAGCGTATATACACTATGTATACACAATGAAAAACTATCTCAAAAATGACAACCGAATCCGTATTTTTTTTTATGAAAAAAAAAAAAATTGTTATGAATCAATTCCAAGTTGAAAAAAGAATCGAATATTCATTGATCAAATCATTCACTCCATAGTCTGATCGATCTTTTCTTTTGAAAAACTGATTAATCGGACAAAAATAAAGATAGAGTCCCATTCTACATGTCAATATCAATACCGGCAACAATGAAATTTAAAGTAAGAGGAAAATCCGTCGACTTTAAAAATCGTGAGGGTTCAAGTCCTTTTTTCCCCAAAAG
>XL19
AGTCCCTGACTGCTGCTATTGAGCCCCATCTACAAATGGATAATTCTGTCTTAGTGGAGACGTAGTTTTTGAAAATAACGGTAGAAATACCGACTCTCTTGCAAGAGAGTCGGTATTTCTCAGTTATTTTTTATGTTTTTCTTTAGTAGTTTTTTATTTCTATCTTTTTTTTACGAAAAGTATTTTTATGCTTTTGCTTTGATTTTGTCTGATATTTTTGTTATGGTTATGGGCTCATATTCGTTATGTACCAGTATAATAATATTAGTTATTTGTTAATCCCACTAATAAAGTTCTAATTTTATTAATTCGATTCTAATTTTCGAATTTTTTAGTTTTTTTAATATAAAATAAAAGAAAAGAGAAAGTTGTAATTTTATGCCTCTTAGATCTTCATTTCTATTTTAATCATTTCTATTTTAAATGGTAGAAATTGAAACCTTTTTATTAAATATTTTATTAAATAGAAATAAAAAAATTTTTAAATCGTGGAGGAAGGGGGGGCGGATGTAGCCAAGTGGATCAAGGCAGTGGATTGTGAATCCACCAAACGCGACGAGTGGCATGCATGAGCTTGGTATGGAACCTACTAAGTGATAACTTTCAAATTCAGAGAAACCCTGGAATCAAAAATGGGCAATCCTGAGCCAAATCCTGTTTTACAAGAACAAACAAGGGTTCAGAAAGCGAAAAAAAAAAAGGGGGATAGGTGCAGAGACTCAACGGAAGCTGTTCTAAAAAATGGGGTTGACTGCCTTTTTTGGTAAAGAAAGGAAAAGAAATCCTTCTATCGAATATCGAAACTCCATAAAGGATGAAGGATAAGCGTATATACACTATGTATACACAATGAAAAACTATCTCAAAAATGACAACCGAATCCGTATTTTTTTTTATGAAAAAAAAAAAAATTGTTATGAATCAATTCCAAGTTGAAAAAAGAATCGAATATTCATTGATCAAATCATTCACTCCATAGTCTGATCGATCTTTTCTTTTGAAAAACTGATTAATCGGACAAAAATAAAGATAGAGTCCCATTCTACATGTCAATATCAATACCGGCAACAATGAAATTTAAAGTAAAAGGAAAATCCGTCGACTTTAAAAATCGTGAGGGTTCAAGTCCCCCTTTTCCCCAAA
>XL20
AATTCACTGACTAGCTGCTATTGAGCCCCATCTACAAATGGATAATTCTGTCTTAGTGGAGACGAGTTTTTGAAAATAACGGAGAAATACCGACTCTCTTGCAAGAGAGTCGGTATTTCTCAGTTATTTTTTATGTTTTTCTTTAGTAGTTTTTTATTTCTATCTTTTTTTTACGAAAAGTATTTTTATGCTTTTGCTTTAATTTTGTCTGATATTTTTGTTATGGTTATGGGCTCATATTCGTTATGTACCAGTATAATAATATTAGTTATTTGTTAATCCCACTAATAAAGTTCTAATTTTATTAATTCGATTCTAATTTTCGAATTTTTTAGTTTTTTTAATATAAAATAAAAGAAAAGAGAAAGTTGTAATTTTATGCCTCTTAGATCTTCATTTCTATTTTAATCATTTCTATTTTAAATGGTAGAAATTGAAACCTTTTTATTAAATATTTTATTAAATAGAAATAAAAAAATTTTTAAATCGTGGAGGAAGGGGGGGCGGATGTAGCCAAGTGGATCAAGGCAGTGGATTGTGAATCCACCAAACGCGAGGGATGCATGAGCTTGGTATGGAACCTACTAAGTGATAACTTTCAAATTCAGAGAAACCCTGGAATCAAAAATGGGCAATCCTGAGCCAAATCCTGTTTTACAAGAACAAACAAGGGTTCAGAAAGCGAAAAAAAAAAAGGGGGATAGGTGCAGAGACTCAACGGAAGCTGTTCTAAAAAATGGGGTTGACTGCCTTTTTTGGTAAAGAAAGGAAAAGAAATCCTTCTATCGAATATCGAAACTCCATAAAGGATGAAGGATAAGCGTATATACACTATGTATACACAATGAAAAACTATCTCAAAAATGACAACCGAATCCGTATTTTTTTTTATGAAAAAAAAAAAAATTGTTATGAATCAATTCCAAGTTGAAAAAAGAATCGAATATTCATTGATCAAATCATTCACTCCATAGTCTGATCGATCTTTTCTTTTGAAAAACTGATTAATCGGACAAAAATAAAGATAGAGTCCCATTCTACATGTCAATATCAATACCGGCAACAATGAAATTTAAAGTAAGAGGAAAATCCGTCGACTTTAAAAATCGTGAGGGTTCAAGTCCTCCTTTTCCCAA
>XL21
AATTCACTGACTGCTGCTATTGAGCCCCATCTACAAATGGATAATTCTGTCTTAGTGGAGACGAGTTTTTGAAAATAACGGAGAAATACCGACTCTCTTGCAAGAGAGTCGGTATTTCTCCGTTATTTTTTATGTTTTTCTTTAACAGTTTTTTATTTCTATCTTTTTTTTACGGGCTTTATTTTTATGCTTTTGCTTTGATTTTGTCTGATATTTTTGTTATGGTTATGGGCTCATATTCGTTATGTACCAGTATAATAATATTAGTTATTTGTTAATCCCACTAATAAAGTTCTAATTTTATTAATTCGATTCTAATTTTCGAATTTTTTAGTTTTTTTAATATAAAATAAAAGAAAAGAGAAAGTTGTAATTTTATGCCTCTTAGATCTTCATTTCTATTTTAATCATTTCTATTTTAAATGGTAGAAATTGAAACCTTTTTATTAAATATTTTATTAAATAGAAATAAAAAAATTTTTAAATCGTGGAGGAAGGGGGGGCGGATGTAGCCAAGTGGATCAAGGCAGTGGATTGTGAATCCACCAAACGCGAGGAGCGGCATGCATGAGCTTGGTATGGAACCTACTAAGTGATAACTTTCAAATTCAGAGAAACCCTGGAATCAAAAATGGGCAATCCTGAGCCAAATCCTGTTTTACAAGAACAAACAAGGGTTCAGAAAGCGAAAAAAAAAAAGGGGGATAGGTGCAAAGACTCAACGGAAGCTGTTCTAAAAAATGGGGTTGACTGCCTTTTTTGGTAAAGAAAGGAAAAGAAATCCTTCTATCGAATATCGAAACTCCATAAAGGATGAAGGATAAGCGTATATACACTATGTATACACAATGAAAAACTATCTCAAAAATGACAACCGAATCCGTATTTTTTTTTATGAAAAAAAAAAAAATTGTTATGAATCAATTCCAAGTTGAAAAAAGAATCGAATATTCATTGATCAAATCATTCACTCCATAGTCTGATCGATCTTTTCTTTTGAAAAACTGATTAATCGGACAAAAATAAAGATAGAGTCCCATTCTACATGTCAATATCAATACCGGCAACAATGAAATTTAAAGTAAGAGGAAAATCCGTCGACTTTAAAAATCGTGAGGGTTCAAGTCCTCTTTTCCCCC
>XL22
CGTTCATTGACTGCTGCTATTGAGCCCCATCTACAAATGGATAATTCTGTCTTAGTGGAGACGAGTTTTTGAAAATAACGGAGAAATACCGACTCTCTTGCAAGAGAGTCGGTATTTCTCAGTTATTTTTTATGTTTTTCTTTAGTAGTTTTTTATTTCTATCTTTTTTTTACGGGCAGTATTTTTATGCTTTTGCTTTGATTTTGTCTGATATTTTTGTTATGGTTATGGGCTCATATTCGTTATGTACCAGTATAATAATATTAGTTATTTGTTAATCCCACTAATAAAGTTCTAATTTTATTAATTCGATTCTAATTTTCGAATTTTTTAGTTTTTTTAATATAAAATAAAAGAAAAGAGAAAGTTGTAATTTTATGCCTCTTAGATCTTCATTTCTATTTTAATCATTTCTATTTTAAATGGTAGAAATTGAAACCTTTTTATTAAATATTTTATTAAATAGAAATAAAAAAATTTTTAAATCGTGGAGGAAGGGGGGGCGGATGTAGCCAAGTGGATCAAGGCAGTGGATTGTGAATCCACCAAACGCGACGAAGCATGGCATGAGCTTGGTATGGAACCTACTAAGTGATAACTTTCAAATTCAGAGAAACCCTGGAATCAAAAATGGGCAATCCTGAGCCAAATCCTGTTTTACAAGAACAAACAAGGGTTCAGAAAGCGAAAAAAAAAAAGGGGGATAGGTGCAAAGACTCAACGGAAGCTGTTCTAAAAAATGGGGTTGACTGCCTTTTTTGGTAAAGAAAGGAAAAGAAATCCTTCTATCGAATATCGAAACTCCATAAAGGATGAAGGATAAGCGTATATACACTATGTATACACAATGAAAAACTATCTCAAAAATGACAACCGAATCCGTATTTTTTTTTATGAAAAAAAAAAAAATTGTTATGAATCAATTCCAAGTTGAAAAAAGAATCGAATATTCATTGATCAAATCATTCACTCCATAGTCTGATCGATCTTTTCTTTTGAAAAACTGATTAATCGGACAAAAATAAAGATAGAGTCCCATTCTACATGTCAATATCAATACCGGCAACAATGAAATTTAAAGTAAGAGGAAAATCCGTCGACTTTAAAAATCGTGAGGGTTCAAGTCCCCTTTTCCCCAA
>XL23
ATCACTGACTAGCTGCTATTGAGCCCCATCTACAAATGGATAATTCTGTCTTAGTGGAGACGAGTTTTTGAAAATAACGGAGAAATACCGACTCTCTTGCAAGAGAGTCGGTATTTCTCCGTTATTTTTTATGTTTTTCTTTAGTAGTTTTTTATTTCTATCTTTTTTTTACGAAAAGTATTTTTATGCTTTTGCTTTGATTTTGTCTGATATTTTTGTTATGGTTATGGGCTCATATTCGTTATGTACCAGTATAATAATATTAGTTATTTGTTAATCCCACTAATAAAGTTCTAATTTTATTAATTCGATTCTAATTTTCGAATTTTTTAGTTTTTTTAATATAAAATAAAAGAAAAGAGAAAGTTGTAATTTTATGCCTCTTAGATCTTCATTTCTATTTTAATCATTTCTATTTTAAATGGTAGAAATTGAAACCTTTTTATTAAATATTTTATTAAATAGAAATAAAAAAATTTTTAAATCGTGGAGGAAGGGGGGGCGGATGTAGCCAAGTGGATCAAGGCAGTGGATTGTGAATCCACCAAACGCGAGGGATGCATGAGCTTGGTATGGAACCTACTAAGTGATAACTTTCAAATTCAGAGAAACCCTGGAATCAAAAATGGGCAATCCTGAGCCAAATCCTGTTTTACAAGAACAAACAAGGGTTCAGAAAGCGAAAAAAAAAAAGGGGGATAGGTGCAGAGACTCAACGGAAGCTGTTCTAAAAAATGGGGTTGACTGCCTTTTTTGGTAAAGAAAGGAAAAGAAATCCTTCTATCGAATATCGAAACTCCATAAAGGATGAAGGATAAGCGTATATACACTATGTATACACAATGAAAAACTATCTCAAAAATGACAACCGAATCCGTATTTTTTTTTATGAAAAAAAAAAAAATTGTTATGAATCAATTCCAAGTTGAAAAAAGAATCGAATATTCATTGATCAAATCATTCACTCCATAGTCTGATCGATCTTTTCTTTTGAAAAACTGATTAATCGGACAAAAATAAAGATAGAGTCCCATTCTACATGTCAATATCAATACCGGCAACAATGAAATTTAAAGTAAGAGGAAAATCCGTCGACTTTAAAAATCGTGAGGGTTCAAGTCCTCTTATCCCCCAAGCGG
>XL24
ATCACAGACTAGCTGCTATTGAGCCCCATCTACAAATGGATAATTCTGTCTTAGTGGAGACGAGTTTTTGAAAATAACGGAGAAATACCGACTCTCTTGCAAGAGAGTCGGTATTTCTCAGTTATTTTTTATGTTTTTCTTTAGTAGTTTTTTATTTCTATCTTTTTTTTACGGGCAGTATTTTTATGCTTTTGCTTTGATTTTGTCTGATATTTTTGTTATGGTTATGGGCTCATATTCGTTATGTACCAGTATAATAATATTAGTTATTTGTTAATCCCACTAATAAAGTTCTAATTTTATTAATTCGATTCTAATTTTCGAATTTTTTAGTTTTTTTAATATAAAATAAAAGAAAAGAGAAAGTTGTAATTTTATGCCTCTTAGATCTTCATTTCTATTTTAATCATTTCTATTTTAAATGGTAGAAATTGAAACCTTTTTATTAAATATTTTATTAAATAGAAATAAAAAAATTTTTAAATCGTGGAGGAAGGGGGGGCGGATGTAGCCAAGTGGATCAAGGCAGTGGATTGTGAATCCACCAAACGCGAAGACGGATGCATGAGCTTGGTATGGACCTACTAAGTGATAACTTTCAAATTCAGAGAAACCCTGGAATCAAAAATGGGCAATCCTGAGCCAAATCCTGTTTTACAAGAACAAACAAGGGTTCAGAAAGCGAAAAAAAAAAAGGGGGATAGGTGCAGAGACTCAACGGAAGCTGTTCTAAGAAATGGGGTTGACTGCCTTTTTTGGTAAAGAAAGGAAAAGAAATCCTTCTATCGAATATCGAAACTCCATAAAGGATGAAGGATAAGCGTATATACACTATGTATACACAATGAAAAACTATCTCAAAAATGACAACCGAATCCGTATTTTTTTTTATGAAAAAAAAAAAAATTGTTATGAATCAATTCCAAGTTGAAAAAAGAATCGAATATTCATTGATCAAATCATTCACTCCATAGTCTGATCGATCTTTTCTTTTGAAAAACTGATTAATCGGACAAAAATAAAGATAGAGTCCCATTCTACATGTCAATATCAATACCGGCAACAATGAAATTTAAAGTAAAAGGAAAATCCGTCGACTTTAAAAATCGTGAGGGTTCAAGTCCTTCTTATCCCCA
>XL25
ATCCTAGACTAGCTGCTATTGAGCCCCATCTACAAATGGATAATTCTGTCTTAGTGGAGACGAGTTTTTGAAAATAACGGAGAAATACCGACTCTCTTGCAAGAGAGTCGGTATTTCTCCGTTATTTTTTATGTTTTTCTTTAGTAGTTTTTTATTTCTATCTTTTTTTTACGGGCAGTATTTTTATGCTTTTGCTTTGATTTTGTCTGATATTTTTGTTATGGTTATGGGCTCATATTCGTTATGTACCAGTATAATAATATTAGTTATTTGTTAATCCCACTAATAAAGTTCTAATTTTATTAATTCGATTCTAATTTTCGAATTTTTTAGTTTTTTTAATATAAAATAAAAGAAAAGAGAAAGTTGTAATTTTATGCCTCTTAGATCTTCATTTCTATTTTAATCATTTCTATTTTAAATGGTAGAAATTGAAACCCTTTTATTAAATATTTTATTAAATAGAAATAAAAAAATTTTTAAATCGTGGAGGAAGGGGGGGCGGATGTAGCCAAGTGGATCAAGGCAGTGGATTGTGAATCCACCAACCGCGAGGATGCATGAGCTTGGTATGGAACCTACTAAGTGATAACTTTCAAATTCAGAGAAACCCTGGAATCAAAAATGGGCAATCCTGAGCCAAATCCTGTTTTACAAGAACAAACAAGGGTTCAGAAAGCGAAAAAAAAAAAGGGGGATAGGTGCAGAGACTCAACGGAAGCTGTTCTAAAAAATGGGGTTGACTGCCTTTTTTGGTAAAGAAAGGAAAAGAAATCCTTCTATCGAATATCGAAACTCCATAAAGGATGAAGGATAAGCGTATATACACTATGTATACACAATGAAAAACTATCTCAAAAATGACAACCGAATCCGTATTTTTTTTTATGAAAAAAAAAAAAATTGTTATGAATCAATTCCAAGTTGAAAAAAGAATCGAATATTCATTGATCAAATCATTCACTCCATAGTCTGATCGATCTTTTCTTTTGAAAAACTGATTAATCGGACAAAAATAAAAATAGAGTCCCATTCTACATGTCAATATCAATACCGGCAACAATGAAATTTAGAGTAAGAGGAAAATCCGTCGACTTTAAAAATCGTGAGGGTTCAAGTCTTCTTTATTCCCCCAAGGTA
>WM01
TATCTCTGACTGCTGCTATTGAGCCCCATCTACAAATGGATAATTCTGTCTTAGTGGAGACGAGTTTTTGAAAATAACGGAGAAATACCGACTCTCTTGCAAGAGAGTCGGTATTTCTCCGTTATTTTTTATGTTTTTCCTTAGTAGTTTTTTATTTCTATCTTTTTTTTACGAAAAGTATTTTTATGCTTTTGCTTTGATTTTGTCTGATATTTTTGTTATGGTTATGGGCTCATATTCGTTATGTACCAGTATAATAATATTAGTTATTTGTTAATCCCACTAATAAAGTTCTAATTTTATTAATTCGATTCTAATTTTCGAATTTTTTAGTTTTTTTAATATAAAATAAAAGAAAAGAGAAAGTTGTAATTTTATGCCTCTTAGATCTTCATTTCTATTTTAATCATTTCTATTTTAAATGGTAGAAATTGAAACCTTTTTATTAAATATTTTATTAAATAGAAATAAAAAAATTTTTAAATCGTGGAGGAAGGGGGGGCGGATGTAGCCCAGTGGATCAAGGCAGTGGATTGTGAATCCCCCATGAGCGAGGAGCTTTAATGCATGAGCTTGGTATGGAACCTACTAAGTGATAACTTTCAAATTCAGAGAAACCCTGGAATCAAAAATGGGCAATCCTGAGCCAAATCCTGTTTTACAAGAACAAACAAGGGTTCAGAAAGCGAAAAAAAAAAAGGGGGATAGGTGCAAAGACTCAACGGAAGCTGTTCTAAAAAATGGGGTTGACTGCCTTTTTTGGTAAAGAAAGGAAAAGAAATCCTTCTATCGAATATCGAAACTCCATAAAGGATGAAGGATAAGCGTATATACACTATGTATACACAATGAAAAACTATCTCAAAAATGACAACCGAATCCGTATTTTTTTTTATGAAAAAAAAAAAAATTGTTATGAATCAATTCCAAGTTGAAAAAAGAATCGAATATTCATTGATCAAATCATTCACTCCATAGTCTGATCGATCTTTTCTTTTGAAAAACTGATTAATCGGACAAGAATAAAGATAGAGTCCCATTCTACATGTCAATATCAATACCGGCAACAATGAAATTTAGAGTAAGAGGAAAATCCGTCGACTTTAGAAATCGTGAGGGTTCAAGTCCCTCTTATCCCCA
>WM02
CCTGTTGACTAGCTGCTATTGAGCCCCATCTACAAATGGATAATTCTGTCTTAGTGGAGACGAGTTTTTGAAAATAACGGAGAAATACCGACTCTCTTGCAAGATAGTCGGTATTTCTCCGTTATTTTTAATGTTTTTCTTTAGAAGTTTTTATTTTCTATGCTTTTTTTTCCAGCTTTCTTTTTTCGTTTATTTTATATTAAAAAACCGAAATTATTGTAATGGTTAAAACGAATTAATAAAATTAGAACTTTATTAATGGGATTAACTAATAGCTAATCCCATTATACTGGTACATAACTAATATGATCCCTTCACCTTTACAAATTTATCAGACAAAATCAAAGCAAAAGCATAAAAATACTTTTCGTAAAAAAAAGATCCAAATAAAAAACTACTAAAGAAAAACATAAAAAATAACGGAGAAATACCAAATTGAAACCTTTTTATTAAATATTTTATTAAATAGAAATAAAAAAATTTTTAAATCGTGGAGGAAGGGGGGGCGGATGTGGCCCAGTGGATCAAGGCAGTGGATTGTGAATCCACCAACACGCGAGTAGCATTACGTTATGCATAACAACCATGCTGAGCTTGGTATGGAACCTACTAAGTGATAACTTTCAAATTCAGAGAAACCCTGGAATCAAAAATGGGCAATCCTGAGCCAAATCCTGTTTTACAAGAACAAACAAGGGTTCAGAAAGCGAAAAAAAAAAAGGGGGATAGGTGCAGAGACTCAACGGAAGCTGTTCTAAAAAATGGGGTTGACTGCCTTTTTTGGTAAAGAAAGGAAAAGAAATCCTTCTATCGAATATCGAAACTCCATAAAGGATGAAGGATAAGCGTATATACACTATGTATACACAATGAAAAACTATCTCAAAAATGACAACCGAATCCGTATTTTTTTTTATGAAAAAAAAAAAAATTGTTATGAATCAATTCCAAGTTGAAAAAAGAATCGAATATTCATTGATCAAATCATTCACTCCATAGTCTGATCGATCTTTTCTTTTGAAAAACTGATTAATCGGACAAAAATAAAGATAGAGTCCCATTCTACATGTCAATATCAATACCGGCAACAATGAAATTTAAAGTAAGAGGAAAATCCGTCGACTTTAAAAATCGTGAGGGTTCAAGTCCTCTTATCCCCACAA
>WM03
ATCACTGACTAGCTGCTATTGAGCCCCATCTACAAATGGATAATTCTGTCTTAGTGGAGACGAGTTTTTGAAAATAACGGAGAAATACCGACTCTCTTGCAAGAGAGTCGGTATTTCTCCGTTATTTTTTATGTTTTTCTTTAATAGTTTTTTATTTCTATCTTTTTTTTACGAAAAGTATTTTTATGCTTTTGCTTTGGTTTGTCTGATATTTTTGTTATGGTTATGGGCTCATATTCGTTATGTACCAGTATAATAATATTAGTTATTTGTTAATCCCACTAATAAAGTTCTAATTTTATTAATTCGATTCTAATTTTCGAATTTTTTAGTTTTTTTAATATAAAATAAAAGAAAAGAGAAAGTTGTAATTTTATGCCTCTTAGATCTTCATTTCTATTTTAATCATTTCTATTTTAAATGGTAGAAATTGAAACCCTTTTATTAAATATTTTATTAAATACAAATAAAAAAATTTTTAAATCGTGGAGGAAGGGGGGGCGGATGTAGCCAAGTGGATCATGGCGATGGATTGTGAATCCCCCACAAGCGAGGGAGTTTCGATGCATGAGCTTGGTATGGAACCTACTAAGTGATAACTTTCAAATTCAGAGAAACCCTGGAATCAAAAATGGGCAATCCTGAGCCAAATCCTGTTTTACAAGAACAAACAAGGGTTCAGAAAGCGAAAAAAAAAAAGGGGGATAGGTGCAGAGACTCAACGGAAGCTGTTCTAAAAAATGGGGTTGACTGCCTTTTTTGGTAAAGAAAGGAAAAGAAATCCTTCTATCGAATATCGAAACTCCATAAAGGATGAAGGATAAGCGTATATACACTATGTATACACAATGAAAAACTATCTCAAAAATGACAACCGAATCCGTATTTTTTTTTATGAAAAAAAAAAAAATTGTTATGAATCAATTCCAAGTTGAAAAAAGAATCGAATATTCATTGATCAAATCATTCACTCCATAGTCTGATCGATCTTTTCTTTTGAAAAACTGATTAATCGGACAAAAATAAAGATAGAGTCCCATTCTACATGTCAATATCAATACCGGCAACAATGAAATTTAAAGTAAGAGGAAAATCCGTCGACTTTAAAAATCGTGAGGGTTCAAGTCCTTCTTATCCCCCAA
>WM04
AATCACTGACTGCTGCTATTGAGCCCCATCTACAAATGGATAATTCTGTCTTAGTGGAGACGAGTTTTTGAAAATAACGGAGAAATACCGACTCTCTTGCAAGAGAGTCGGTATTTCTCCGTTATTTTTTATGTTTTTCTTTAGTAGTTTTTTATTTCTATCTTTTTTTTACGAAAAGTATTTTTATGCTTTTGCTTTGATTTTGTCTGATATTTTTGTTATGGTTATGGGCTCATATTCGTTATGTACCAGTATAATAATATTAGTTATTTGTTAATCCCACTAATAAAGTTCTAATTTTATTAATTCGATTCTAATTTTCGAATTTTTTAGTTTTTTTAATATAAAATAAAAGAAAAGAGAAAGTTGTAATTTTATGCCTCTTAGATCTTCATTTCTATTTTAATCATTTCTATTTTAAATGGTGTAAATTGAAACCCTTTTATTTAATAATTTATTAAACACAAATAAAAAAATTTTTAAATCGTGGAGGAAGGGGGGGCGGATGTAGCCTAGTGGGAAATGGCAGTGGATTGTGAATCCCCCAACACACGACGAACGATGCTGAGCTTGGTTGGAACCTACTAAGTGATAACTTTCAAATTCAGAGAAACCCTGGAATCAAAAATGGGCAATCCTGAGCCAAATCCTGTTTTACAAGAACAAACAAGGGTTCAGAAAGCGAAAAAAAAAAAGGGGGATAGGTGCAGAGACTCAACGGAAGCTGTTCTAAAAAATGGGGTTGACTGCCTTTTTTGGTAAAGAAAGGAAAAGAAATCCTTCTATCGAATATCGAAACTCCATAAAGGATGAAGGATAAGCGTATATACACTATGTATACACAATGAAAAACTATCTCAAAAATGACAACCGAATCCGTATTTTTTTTTATGAAAAAAAAAAAAATTGTTATGAATCAATTCCAAGTTGAAAAAAGAATCGAATATTCATTGATCAAATCATTCACTCCATAGTCTGATCGATCTTTTCTTTTGAAAAACTGATTAATCGGACAAGAATAAAGATAGAGTCCCATTCTACATGTCAATATCAATACCGGCAACAATGAAATTTAAAGTAAGAGGAAAATCCGTCGACTTTAAAAATCGTGAGGGTTCAAGTCCTCTTTTCCCCAAAGACA
>WM05
AATCTCAGACTAGCTGCTATTGAGCCCCATCTACAAATGGATAATTCTGTCTTAGTGGAGACGAGTTTTTGAAAATAACGGAGAAATACCGACTCTCTTGCAAGAGAGTCGGTATTTCTCCGTTATTTTTTATGTTTTTCTTTAGTAGTTTTTTATTTCTATCTTTTTTTTACGAAAAGTATTTTTATGCTTTTGCTTGATTTTGTCTGATATTTTTGTTATGGTTATGAGCTCATATTCGTTATGTACCAGTATAATAATATTAGTTATTTGTTAATCCCACTAATAAAGTTCTAATTTTATTAATTCGATTCTAATTTTCGAATTTTTTAGTTTTTTTAATATAAAATAAAAGAAAAGAGAAAGTTGTAATTTTATGCCTCTTAGATCTTCATTTCTATTTTAATCATTTCTATTTTAAATGGTAGAAATTGAAACCTTTTTATTAAATATTTTATTAAACAGAAATAAAAAAATTTTTAAATCGTGGAGGAAGGGGGGGCGGATGTAGCCAAGTGGATCAAGGCAGTGGATTGTGAATCCACCATGCGCGAGGAACTGATGCATGAGCTTGGTATGGAACCTACTAAGTGATAACTTTCAAATTCAGAGAAACCCTGGAATCAAAAATGGGCAATCCTGAGCCAAATCCTGTTTTACAAGAACAAACAAGGGTTCAGAAAGCGAAAAAAAAAAAGGGGGATAGGTGCAGAGACTCAACGGAAGCTGTTCTAAAAAATGGGGTTGACTGCCTTTTTTGGTAAAAAAAGGAAAAAAAATCCTTCTATCGAATATCGAAACTCCATAAAGGATGAAGGATAAGCGTATATACACTATGTATACACAATGAAAAACTATCTCAAAAATGACAACCGAATCCGTATTTTTTTTTATGAAAAAAAAAAAAATTGTTATGAATCAATTCCAAGTTGAAAAAAGAATCGAATATTCATTGATCAAATCATTCACTCCATAGTCTGATCGATCTTTTCTTTTGAAAAACTGATTAATCGGACAAAAATAAAGATAGAGTCCCATTCTACATGTCAATATCAATACCGGCAACAATGAAATTTAAAGTAAGAGGAAAATCCGTCGACTTTAAAAATCGGGAGGGTTCAAGTCCCTCTTATTCCCCAA
>WM06
AATTCACTGACTAGCTGCTATTGAGCCCCATCTACAAATGGATAATTCTGTCTTAGTGGAGACGAGTTTTTGAAAATAACGGAGAAATACCGACTCTCTTGCAAGAGAGTCGGTATTTCTCCGTTATTTTTTATGTTTTTCTTTAGTAGTTTTTTATTTCTATCTTTTTTTTGGGGCATTATTTTTATGCTTTTGCTTTGGAAGTGTCTGATATTTTTGTTATGGTTATGGGCTCATATTCGTTATGTACCAGTATAATAATATTAGTTATTTGTTAATCCCACTAATAAAGTTCTAATTTTATTAATTCGATTCTAATTTTCGAATTTTTTAGTTTTTTTAATATAAAATAAAAGAAAAGAGAAAGTTGTAATTTTATGCCTCTTAGATCTTCATTTCTATTTTAATCATTTCTATTTTAAATGGTAGAAATTGAAACCTTTTTATTAAATATTTTATTAAATACAAATAAAAAAATTTTTAAATCGTGGAGGAAGGGGGGGCGGATGTAGCCAAGTGGATCAAGGCAGTGGATTGTGAATCCACCATGAACGAGGAGTTCATGCATGAGCTTGGTATGGAACCTACTAAGTGATAACTTTCAAATTCAGAGAAACCCTGGAATCAAAAATGGGCAATCCTGAGCCAAATCCTGTTTTACAAGAACAAACAAGGGTTCAGAAAGCGAAAAAAAAAAAGGGGGATAGGTGCAGAGACTCAACGGAAGCTGTTCTAAGAAATGGGGTTGACTGCCTTTTTTGGTAAAGAAAGGAAAAGAAATCCTTCTATCGAATATCGAAACTCCATAAAGGATGAAGGATAAGCGTATATACACTATGTATACACAATGAAAAACTATCTCAAAAATGACAACCGAATCCGTATTTTTTTTTATGAAAAAAAAAAGAATTGTTATGAATCAATTCCAAGTTGAAAAAAGAATCGAATATTCATTGATCAAATCATTCACTCCATAGTCTGATCGATCTTTTCTTTTGAAAAACTGATTAATCGGACAAGAATAAAGATAGAGTCCCATTCTACATGTCAATATCAATACCGGCAACAATGAAATTTAAAGTAAGAGGAAAATCCGTCGACTTTAAAAATCGTGAGGGTTCAAGTCCTTTTTTTCCCCCA
>WM07
TAGTCACTGACTAGCTGCTATTGAGCCCCATCTACAAATGGATAATTCTGTCTTAGTGGAGACGAGTTTTTGAAAATAACGGAGAAATACCGACTCTCTTGCAAGAGAGTCGGTATTTCTCCGTTATTTTTTATGTTTTTCCTTAACAATTTTTTATTTCTATCTTTTTTTTACGAAAAGTATTTTTATGCTTTTGCTTTGATTTTGTCTGATATTTTTGTTATGGTTATGGGCTCATATTCGTTATGTACCAGTATAATAATATTAGTTATTTGTTAATCCCACTAATAAAGTTCTAATTTTATTAATTCGATTCTAATTTTCGAATTTTTTAGTTTTTTTAATATAAAATAAAAGAAAAGAGAAAGTTGTAATTTTATGCCTCTTAGATCTTCATTTCTATTTTAATCATTTCTATTTTAAATGGTAGAAATTGAAACCCTTTTATTAAATATTTTATTAAATAGAAATAAAAAAATTTTTAAATCGTGGAGGAAGGGGGGGCGGATGTAGCCAAGTGGATCAAGGCAGTGGATTGTGAATCCACCATGCGCGAGAGAGTTCGCAATGAATGAGCTTGGTATGGAACCTACTAAGTGATAACTTTCAAATTCAGAGAAACCCTGGAATCAAAAATGGGCAATCCTGAGCCAAATCCTGTTTTACAAGAACAAACAAGGGTTCAGAAAGCGAAAAAAAAAAAGGGGGATAGGTGCAGAGACTCAACGGAAGCTGTTCTAAAAAATGGGGTTGACTGCCTTTTTTGGTAAAGAAAGGAAAAAAAATCCTTCTATCGAATATCGAAACTCCATAAAGGATGAAGGATAAGCGTATATACACTATGTATACACAATGAAAAACTATCTCAAAAATGACAACCGAATCCGTATTTTTTTTTATGAAAAAAAAAAAAATTGTTATGAATCAATTCCAAGTTGAAAAAAGAATCGAATATTCATTGATCAAATCATTCACTCCATAGTCTGATCGATCTTTTCTTTTGAAAAACTGATTAATCGGACAAAAATAAAGATAGAGTCCCATTCTACATGTCAATATCAATACCGGCAACAATGAAATTTAAAGTAAGAGGAAAATCCGTCGACTTTAAAAATCGTGAGGGTTCAAGTCCCTCTTTTCCCCAA
>WM08
AATTCTCTGACTAGCTGCTATTGAGCCCCATCTACAAATGGATAATTCTGTCTTAGTGGAGACGAGTTTTTGAAAATAACGGAGAAATACCGACTCTCTTGCAAGAGAGTCGGTATTTCTCCGTTATTTTTTATGTTTTTCTTTAGTAGTTTTTTATTTCTATCTTTTTTTTACGAAAAGTATTTTTATGCTTTTGCTTTGATTTTGTCTGATATTTTTGTTATGGTTATGGGCTCATATTCGTTATGTACCAGTATAATAATATTAGTTATTTGTTAATCCCACTAATAAAGTTCTAATTTTATTAATTCGATTCTAATTTTCGAATTTTTTAGTTTTTTTAATATAAAATAAAAGAAAAGAGAAAGTTGTAATTTTATGCCTCTTAGATCTTCATTTCTATTTTAATCATTTCTATTTTAAATGGTAGAAATTGAAACCTTTTTATTAAATATTTTATTAAATAGAAATAAAAAAATTTTTAAATCGTGGAGGAAGGGGGGGCGGATGTAGCCAAGTGGATCAAGGCAGTGGATTGTGAATCCACCATGCGCGAGGAGCCGCATGCATGAGCTGGTATGGAACCTACTAAGTGATAACTTTCAAATTCAGAGAAACCCTGGAATCAAAAATGGGCAATCCTGAGCCAAATCCTGTTTTACAAGAACAAACAAGGGTTCAGAAAGCGAAAAAAAAAAAGGGGGATAGGTGCAGAGACTCAACGGAAGCTGTTCTAAGAAATGGGGTTGACTGCCTTTTTTGGTAAAGAAAGGAAAAGAAATCCTTCTATCGAATATCGAAACTCCATAAAGGATGAAGGATAAGCGTATATACACTATGTATACACAATGAAAAACTATCTCAAAAATGACAACCGAATCCGTATTTTTTTTTATGAAAAAAAAAAAAATTGTTATGAATCAATTCCAAGTTGAAAAAAGAATCGAATATTCATTGATCAAATCATTCACTCCATAGTCTGATCGATCTTTTCTTTTGAAAAACTGATTAATCGGACAAAAATAAAGATAGAGTCCCATTCTACATGTCAATATCAATACCGGCAACAATGAAATTTAAAGTAAGAGGAAAATCCGTCGACTTTAAAAATCGTGAGGGTTCAAGTCCCCTTTTCCCCCAA
>WM09
AGTCACTGACTAGCTGCTATTGAGCCCCATCTACAAATGGATAATTCTGTCTTAGTGGAGACGAGTTTTTGAAAATAACGGAGAAATACCGACTCTCTTGCAAGAGAGTCGGTATTTCTCCGTTATTTTTTATGTTTTTCTTTAGTAGTTTTTTATTTCTATCTTTTTTTTACGAAAAGTATTTTTATGCTTTTGCTTTGATTTTGTCTGATATTTTTGTTATGGTTATGGGCTCATATTCGTTATGTACCAGTATAATAATATTAGTTATTTGTTAATCCCACTAATAAAGTTCTAATTTTATTAATTCGATTCTAATTTTCGAATTTTTTAGTTTTTTTAATATAAAATAAAAGAAAAGAGAAAGTTGTAATTTTATGCCTCTTAGATCTTCATTTCTATTTTAATCATTTCTATTTTAAATGGTAGAAATTGAAACCTTTTTATTAAATATTTTATTAAATAGAAATAAAAAAATTTTTAAATCGTGGAGGAAGGGGGGGCGGATGTAGCCAAGTGGATCAAGGCAGTGGATTGTGAATCCACCAAAAAGCGAGAAACATGCATGACTGGTTGGAACCTACTAAGTGATAACTTTCAAATTCAGAGAAACCCTGGAATCAAAAATGGGCAATCCTGAGCCAAATCCTGTTTTACAAGAACAAACAAGGGTTCAGAAAGCGAAAAAAAAAAAGGGGGATAGGTGCAGAGACTCAACGGAAGCTGTTCTAAAAAATGGGGTTGACTGCCTTTTTTGGTAAAGAAAGGAAAAAAAATCCTTCTATCGAATATCGAAACTCCATAAAGGATGAAGGATAAGCGTATATACACTATGTATACACAATGAAAAACTATCTCAAAAATGACAACCGAATCCGTATTTTTTTTTATGAAAAAAAAAAAAATTGTTATGAATCAATTCCAAGTTGAAAAAAAAATCGAATATTCATTGATCAAATCATTCACTCCATAGTCTGATCGATCTTTTCTTTTGAAAAACTGATTAATCGGACAAAAATAAAGATAGAGTCCCATTCTACATGTCAATATCAATACCGGCAACAATGAAATTTAAAGTAAAAGGAAAATCCGTCGACTTTAAAAATCGTGAGGGTTCAAGTCCCTCTTTATCCCCAA
>WM10
AGTCTTGACTAGCTGCTATTGAGCCCCATCTACAAATGGATAATTCTGTCTTAGTGGAGACGAGTTTTTGAAAATAACGGAGAAATACCGACTCTCTTGCAAGAGAGTCGGTATTTCTCCGTTATTTTTTATGTTTTTCTTTAACAGTTTTTTATTTCTATCTTTTTTTTGGGGCAGTATTTTTATGCTTTTGCTTTGGAAGTGTCTGATATTTTTGTTATGGTTATGGGCTCATATTCGTTATGTACCAGTATAATAATATTAGTTATTTGTTAATCCCACTAATAAAGTTCTAATTTTATTAATTCGATTCTAATTTTCGAATTTTTTAGTTTTTTTAATATAAAATAAAAGAAAAGAGAAAGTTGTAATTTTATGCCTCTTAGATCTTCATTTCTATTTTAATCATTTCTATTTTAAATGGTAGAAATTGAAACCCTTTTTTTAAATATTTTATTAAATACAAATAAAAAAATTTTTAAATCGTGGAGGAAGGGGGGGCGGATGTAGCCAAGTGGATCAAGGCAGTGGATTGTGAATCCACCACAAAACGAGAAATATTGCATGACTTGGTTGGACCTACTAAGTGATAACTTTCAAATTCAGAGAAACCCTGGAATCAAAAATGGGCAATCCTGAGCCAAATCCTGTTTTACAAGAACAAACAAGGGTTCAGAAAGCGAAAAAAAAAAAGGGGGATAGGTGCAAAAACTCAACGGAAGCTGTTCTAAAAAATGGGGTTGACTGCCTTTTTTGGTAAAGAAAGGAAAAAAAATCCTTCTATCGAATATCGAAACTCCATAAAGGATGAAGGATAAGCGTATATACACTATGTATACACAATGAAAAACTATCTCAAAAATGACAACCGAATCCGTATTTTTTTTTATGAAAAAAAAAAAAATTGTTATGAATCAATTCCAAGTTGAAAAAAAAATCGAATATTCATTGATCAAATCATTCACTCCATAGTCTGATCGATCTTTTCTTTTGAAAAACTGATTAATCGGACAAAAATAAAAATAGAGTCCCATTCTACATGTCAATATCAATACCGGCAACAATGAAATTTAAAGTAAAAGGAAAATCCGTCGACTTTAAAAATCGTGAGGGTTCAAGTCCCTCCTATCCCCAA
>WM11
ATCACTGACTAGCTGCTATTGAGCCCCATCTACAAATGGATAATTCTGTCTTAGTGGAGACGAGTTTTTGAAAATAACGGAGAAATACCGACTCTCTTGCAAGAGAGTCGGTATTTCTCCGTTATTTTTTATGTTTTTCTTTAGTAGTTTTTTATTTCTATCTTTTTTTTACGAAAAGTATTTTTATGCTTTTGCTTTGGTTTGTCTGATATTTTTGTTATGGTTATGGGCTCATATTCGTTATGTACCAGTATAATAATATTAGTTATTTGTTAATCCCACTAATAAAGTTCTAATTTTATTAATTCGATTCTAATTTTCGAATTTTTTAGTTTTTTTAATATAAAATAAAAGAAAAGAGAAAGTTGTAATTTTATGCCTCTTAGATCTTCATTTCTATTTTAATCATTTCTATTTTAAATGGTAGAAATTGAAACCTTTTTATTAAATATTTTATTAAATAGAAATAAAAAAATTTTTAAATCGTGGAGGAAGGGGGGGCGGATGTAGCCAAGTGGATCAAGGCAGTGGATTGTGAATCCACCAAGCGCGACGAACTCGAAGGCATGGGCTGGTTGGACCTACTAAGTGATAACTTTCAAATTCAGAGAAACCCTGGAATCAAAAATGGGCAATCCTGAGCCAAATCCTGTTTTACAAGAACAAACAAGGGTTCAGAAAGCGAAAAAAAAAAAGGGGGATAGGTGCAGAAACTCAACGGAAGCTGTTCTAAAAAATGGGGTTGACTGCCTTTTTTGGTAAAAAAAGGAAAAAAAATCCTTCTATCGAATATCGAAACTCCATAAAGGATGAAGGATAAGCGTATATACACTATGTATACACAATGAAAAACTATCTCAAAAATGACAACCGAATCCGTATTTTTTTTTATGAAAAAAAAAAAAATTGTTATGAATCAATTCCAAGTTGAAAAAAAAATCGAATATTCATTGATCAAATCATTCACTCCATAGTCTGATCGATCTTTTCTTTTGAAAAACTGATTAATCGGACAAAAATAAAAATAGAGTCCCATTCTACATGTCAATATCAATACCGGCAACAATGAAATTTAAAGTAAAAGGAAAATCCGTCGACTTTAAAAATCGTGAGGGTTCAAGTCCCTCCTATCCCCAA
>WM12
ATCACTGACTAGCTGCTATTGAGCCCCATCTACAAATGGATAATTCTGTCTTAGTGGAGACGAGTTTTTGAAAATAACGGAGAAATACCGACTCTCTTGCAAGAGAGTCGGTATTTCTCCGTTATTTTTTATGTTTTTCTTTAGTAGTTTTTTATTTCTATCTTTTTTTTACGAAAAGTATTTTTATGCTTTTGCTTTGATTTTGTCTGATATTTTTGTTATGGTTATGGGCTCATATTCGTTATGTACCAGTATAATAATATTAGTTATTTGTTAATCCCACTAATAAAGTTCTAATTTTATTAATTCGATTCTAATTTTCGAATTTTTTAGTTTTTTTAATATAAAATAAAAGAAAAGAGAAAGTTGTAATTTTATGCCTCTTAGATCTTCATTTCTATTTTAATCATTTCTATTTTAAATGGTAGAAATTGAAACCTTTTTATTAAATATTTTATTAAATAGAAATAAAAAAATTTTTAAATCGTGGAGGAAGGGGGGGCGGATGTAGCCAAGTGGATCAAGGCAGTGGATTGTGAATCCACCATGACCGACGAAAATGCATGAGCTGGTATGGACCTACTTAAGTGATAACTTTCAAATTCAGAGAAACCCTGGAATCAAAAATGGGCAATCCTGAGCCAAATCCTGTTTTACAAGAACAAACAAGGGTTCAGAAAGCGAAAAAAAAAAAGGGGGATAGGTGCAGAGACTCAACGGAAGCTGTTCTAAAAAATGGGGTTGACTGCCTTTTTTGGTAAAGAAAGGAAAAGAAATCCTTCTATCGAATATCGAAACTCCATAAAGGATGAAGGATAAGCGTATATACACTATGTATACACAATGAAAAACTATCTCAAAAATGACAACCGAATCCGTATTTTTTTTTATGAAAAAAAAAAAAATTGTTATGAATCAATTCCAAGTTGAAAAAAGAATCGAATATTCATTGATCAAATCATTCACTCCATAGTCTGATCGATCTTTTCTTTTGAAAAACTGATTAATCGGACAAAAATAAAGATAGAGTCCCATTCTACATGTCAATATCAATACCGGCAACAATGAAATTTAAAGTAAGAGGAAAATCCGTCGACTTTAAAAATCGTGAGGGTTCAAGTCCCTCTTATTCCCCAA
>WM13
TCACTGACTAGCTGCTATTGAGCCCCATCTACAAATGGATAATTCTGTCTTAGTGGAGACGAGTTTTTGAAAATAACGGAGAAATACCGACTCTCTTGCAAGAGAGTCGGTATTTCTCCGTTATTTTTTATGTTTTTCTTTAGTAGTTTTTTATTTCTATCTTTTTTTTACGGGCAGTATTTTTATGCTTTTGCTTTGGTTTGTCTGATATTTTTGTTATGGTTATGGGCTCATATTCGTTATGTACCAGTATAATAATATTAGTTATTTGTTAATCCCACTAATAAAGTTCTAATTTTATTAATTCGATTCTAATTTTCGAATTTTTTAGTTTTTTTAATATAAAATAAAAGAAAAGAGAAAGTTGTAATTTTATGCCTCTTAGATCTTCATTTCTATTTTAATCATTTCTATTTTAAATGGTAGAAATTGAAACCTTTTTATTAAATATTTTATTAAATACAAATAAAAAAATTTTTAAATCGTGGAGGAAGGGGGGGCGGATGTAGCCAAGTGGATCAAGGCAGTGGATTGTGAATCCACCAAAAAGCGACGACCTATGGGGATGGGCTTGGTATGGACCTACTAAGTGATAACTTTCAAATTCAGAGAAACCCTGGAATCAAAAATGGGCAATCCTGAGCCAAATCCTGTTTTACAAGAACAAACAAGGGTTCAGAAAGCGAAAAAAAAAAAGGGGGATAGGTGCAGAAACTCAACGGAAGCTGTTCTAAAAAATGGGGTTGACTGCCTTTTTTGGTAAAGAAAGGAAAAAAAATCCTTCTATCGAATATCGAAACTCCATAAAGGATGAAGGATAAGCGTATATACACTATGTATACACAATGAAAAACTATCTCAAAAATGACAACCGAATCCGTATTTTTTTTTATGAAAAAAAAAAAAATTGTTATGAATCAATTCCAAGTTGAAAAAAAAATCGAATATTCATTGATCAAATCATTCACTCCATAGTCTGATCGATCTTTTCTTTTGAAAAACTGATTAATCGGACAAGAATAAAGATAGAGTCCCATTCTACATGTCAATATCAATACCGGCAACAATGAAATTTAAAGTAAAAGGAAAATCCGTCGACTTTAAAAATCGTGAGGGTTCAAGTCCCTTCTATCCCCAA
>WM14
TCTCTGACTAGCTGCTATTGAGCCCCATCTACAAATGGATAATTCTGTCTTAGTGGAGACGAGTTTTTGAAAATAACGGAGAAATACCGACTCTCTTGCAAGAGAGTCGGTATTTCTCCGTTATTTTTTATGTTTTTCTTTAGTAGTTTTTTATTTCTATCTTTTTTTTGGGGCATTATTTTTATGCTTTTGCTTTGATTTTGTCTGATATTTTTGTTATGGTTATGGGCTCATATTCGTTATGTACCAGTATAATAATATTAGTTATTTGTTAATCCCACTAATAAAGTTCTAATTTTATTAATTCGATTCTAATTTTCGAATTTTTTAGTTTTTTTAATATAAAATAAAAGAAAAGAGAAAGTTGTAATTTTATGCCTCTTAGATCTTCATTTCTATTTTAATCATTTCTATTTTAAATGGTAGAAATTGAAACCTTTTTATTAAATATTTTATTAAATAGAAATAAAAAAATTTTTAAATCGTGGAGGAAGGGGGGGCGGATGTAGCCAAGTGGATCATGGCAGTGGATTGTGAATCCACCATGAGCGAAGACCGTTGGCTGGGCTTGGTATGGAACCTACTAAGTGATAACTTTCAAATTCAGAGAAACCCTGGAATCAAAAATGGGCAATCCTGAGCCAAATCCTGTTTTACAAGAACAAACAAGGGTTCAGAAAGCGAAAAAAAAAAAGGGGGATAGGTGCAAAAACTCAACGGAAGCTGTTCTAAAAAATGGGGTTGACTGCCTTTTTTGGTAAAAAAAGGAAAAAAAATCCTTCTATCGAATATCGAAACTCCATAAAGGATGAAGGATAAGCGTATATACACTATGTATACACAATGAAAAACTATCTCAAAAATGACAACCGAATCCGTATTTTTTTTTATGAAAAAAAAAAAAATTGTTATGAATCAATTCCAAGTTGAAAAAAAAATCGAATATTCATTGATCAAATCATTCACTCCATAGTCTGATCGATCTTTTCTTTTGAAAAACTGATTAATCGGACAAAAATAAAGATAGAGTCCCATTCTACATGTCAATATCAATACCGGCAACAATGAAATTTAAAGTAAAAGGAAAATCCGTCGACTTTAAAAATCGTGAGGGTTCAAGTCCCTCCTATCCCCAA
>WM15
TCTCTGACTAGCTGCTATTGAGCCCCATCTACAAATGGATAATTCTGTCTTAGTGGAGACGAGTTTTTGAAAATAACGGAGAAATACCGACTCTCTTGCAAGAGAGTCGGTATTTCTCAGTTATTTTTTATGTTTTTCTTTAGTAGTTTTTTATTTCTATCTTTTTTTTACGAAAAGTATTTTTATGCTTTTGCTTTGATTTTGTCTGATATTTTTGTTATGGTTATGGGCTCATATTCGTTATGTACCAGTATAATAATATTAGTTATTTGTTAATCCCACTAATAAAGTTCTAATTTTATTAATTCGATTCTAATTTTCGAATTTTTTAGTTTTTTTAATATAAAATAAAAGAAAAGAGAAAGTTGTAATTTTATGCCTCTTAGATCTTCATTTCTATTTTAATCATTTCTATTTTAAATGGTAGAAATTGAAACCTTTTTATTAAATATTTTATTAAATAGAAATAAAAAAATTTTTAAATCGTGGAGGAAGGGGGGGCGGATGTAGCCAAGTGGATCAAGGCAGTGGATTGTGAATCCACCAACACACGACGATGGATGGCTTGGTTGGAACCTACTAAGTGATAACTTTCAATTCAGAGAAACCCTGGAATCAAAAATGGGCAATCCTGAGCCAAATCCTGTTTTACAAGAACAAACAAGGGTTCAGAAAGCGAAAAAAAAAAAGGGGGATAGGTGCAGAGACTCAACGGAAGCTGTTCTAAAAAATGGGGTTGACTGCCTTTTTTGGTAAAGAAAGGAAAAGAAATCCTTCTATCGAATATCGAAACTCCATAAAGGATGAAGGATAAGCGTATATACACTATGTATACACAATGAAAAACTATCTCAAAAATGACAACCGAATCCGTATTTTTTTTTATGAAAAAAAAAAAAATTGTTATGAATCAATTCCAAGTTGAAAAAAAAATCGAATATTCATTGATCAAATCATTCACTCCATAGTCTGATCGATCTTTTCTTTTGAAAAACTGATTAATCGGACAAAAATAAAGATAGAGTCCCATTCTACATGTCAATATCAATACCGGCAACAATGAAATTTAAAGTAAGAGGAAAATCCGTCGACTTTAAAAATCGTGAGGGTTCAAGTCCCTTTTATCCCCAA
>WM16
AATCACTGACTAGCTGCTATTGAGCCCCATCTACAAATGGATAATTCTGTCTTAGTGGAGACGAGTTTTTGAAAATAACGGAGAAATACCGACTCTCTTGCAAGAGAGTCGGTATTTCTCCGTTATTTTTTATGTTTTTCTTTAGTAGTTTTTTATTTCTATCTTTTTTTTACGAAAAGTATTTTTATGCTTTTGCTTTGATTTTGTCTGATATTTTTGTTATGGTTATGGGCTCATATTCGTTATGTACCAGTATAATAATATTAGTTATTTGTTAATCCCACTAATAAAGTTCTAATTTTATTAATTCGATTCTAATTTTCGAATTTTTTAGTTTTTTTAATATAAAATAAAAGAAAAGAGAAAGTTGTAATTTTATGCCTCTTAGATCTTCATTTCTATTTTAATCATTTCTATTTTAAATGGTAGAAATTGAAACCTTTTTATTAAATATTTTATTAAATACAAATAAAAAAATTTTTAAATCGTGGAGGAAGGGGGGGCGGATGTAGCCAAGTGGATCAAGGCAGTGGATTGTGAATCCACCACGACGCGAGGAGATGGCTGAGCTGGTATGGAACCTACTAAGTGATAACTTTCAAATTCAGAGAAACCCTGGAATCAAAAATGGGCAATCCTGAGCCAAATCCTGTTTTACAAGAACAAACAAGGGTTCAGAAAGCGAAAAAAAAAAAGGGGGATAGGTGCAAAGACTCAACGGAAGCTGTTCTAAAAAATGGGGTTGACTGCCTTTTTTGGTAAAGAAAGGAAAAAAAATCCTTCTATCGAATATCGAAACTCCATAAAGGATGAAGGATAAGCGTATATACACTATGTATACACAATGAAAAACTATCTCAAAAATGACAACCGAATCCGTATTTTTTTTTATGAAAAAAAAAAAAATTGTTATGAATCAATTCCAAGTTGAAAAAAGAATCGAATATTCATTGATCAAATCATTCACTCCATAGTCTGATCGATCTTTTCTTTTGAAAAACTGATTAATCGGACAAAAATAAAGATAGAGTCCCATTCTACATGTCAATATCAATACCGGCAACAATGAAATTTAAAGTAAAAGGAAAATCCGTCGACTTTAAAAATCGTGAGGGTTCAAGTCCCTCTTATCCCCAA
>WM17
CCGCTGACTAGCTGCTATTGAGCCCCATCTACAAATGGATAATTCTGTCTTAGTGGAGACGAGTTTTTGAAAATAACGGAGAAATACCGACTCTCTTGCAAGAGAGTCGGTATTTCTCCGTTATTTTTTATGTTTTTCTTTAGTAGTTTTTTATTTCTATCTTTTTTTTACGAAAAGTATTTTTATGCTTTTGCTTTGATTTTGTCTGATATTTTTGTTATGGTTATGGGCTCATATTCGTTATGTACCAGTATAATAATATTAGTTATTTGTTAATCCCACTAATAAAGTTCTAATTTTATTAATTCGATTCTAATTTTCGAATTTTTTAGTTTTTTTAATATAAAATAAAAGAAAAGAGAAAGTTGTAATTTTATGCCTCTTAGATCTTCATTTCTATTTTAATCATTTCTATTTTAAATGGTAGAAATTGAAACCTTTTTATTAAATATTTTATTAAATACAAATAAAAAAATTTTTAAATCGTGGAGGAAGGGGGGGCGGATGTAGCCAAGTGGATCAAGGCAGTGGATTGTGAATCCACCATGACGCGAGGACGAAGGCATGAGCTGGTATGGACCTACTAAGTGATAACTTTCAAATTCAGAGAAACCCTGGAATCAAAAATGGGCAATCCTGAGCCAAATCCTGTTTTACAAGAACAAACAAGGGTTCAGAAAGCGAAAAAAAAAAAGGGGGATAGGTGCAGAGACTCAACGGAAGCTGTTCTAAAAAATGGGGTTGACTGCCTTTTTTGGTAAAGAAAGGAAAAAAAATCCTTCTATCGAATATCGAAACTCCATAAAGGATGAAGGATAAGCGTATATACACTATGTATACACAATGAAAAACTATCTCAAAAATGACAACCGAATCCGTATTTTTTTTTATGAAAAAAAAAAAAATTGTTATGAATCAATTCCAAGTTGAAAAAAAAATCGAATATTCATTGATCAAATCATTCACTCCATAGTCTGATCGATCTTTTCTTTTGAAAAACTGATTAATCGGACAAAAATAAAGATAGAGTCCCATTCTACATGTCAATATCAATACCGGCAACAATGAAATTTAAAGTAAAAGGAAAATCCGTCGACTTTAAAAATCGTGAGGGTTCAAGTCCTTCTATCCCCA
>WM18
ATCTCTGACTAGCTGCTATTGAGCCCCATCTACAAATGGATAATTCTGTCTTAGTGGAGACGAGTTTTTGAAAATAACGGAGAAATACCGACTCTCTTGCAAGAGAGTCGGTATTTCTCCGTTATTTTTTATGTTTTTCTTTAGTAGTTTTTTATTTCTATCTTTTTTTTACGGGCAGTATTTTTATGCTTTTGCTTTGGAAGTGTCTGATATTTTTGTTATGGTTATGGGCTCATATTCGTTATGTACCAGTATAATAATATTAGTTATTTGTTAATCCCACTAATAAAGTTCTAATTTTATTAATTCGATTCTAATTTTCGAATTTTTTAGTTTTTTTAATATAAAATAAAAGAAAAGAGAAAGTTGTAATTTTATGCCTCTTAGATCTTCATTTCTATTTTAATCATTTCTATTTTAAATGGTAGAAATTGAAACCTTTTTATTAAATATTTTATTAAATACAAATAAAAAAATTTTTAAATCGTGGAGGAAGGGGGGGCGGATGTAGCCAAGTGGATCAAGGCAGTGGATTGTGAATCCACCAAAAAGCGAGCGAAGATGCATGAGCTTGGTTGGAACCTACTAAGTGATAACTTTCAAATTCAGAGAAACCCTGGAATCAAAAATGGGCAATCCTGAGCCAAATCCTGTTTTACAAGAACAAACAAGGGTTCAGAAAGCGAAAAAAAAAAAGGGGGATAGGTGCAGAAACTCAACGGAAGCTGTTCTAAAAAATGGGGTTGACTGCCTTTTTTGGTAAAGAAAGGAAAAAAAATCCTTCTATCGAATATCGAAACTCCATAAAGGATGAAGGATAAGCGTATATACACTATGTATACACAATGAAAAACTATCTCAAAAATGACAACCGAATCCGTATTTTTTTTTATGAAAAAAAAAAAAATTGTTATGAATCAATTCCAAGTTGAAAAAAGAATCGAATATTCATTGATCAAATCATTCACTCCATAGTCTGATCGATCTTTTCTTTTGAAAAACTGATTAATCGGACAAAAATAAAGATAGAGTCCCATTCTACATGTCAATATCAATACCGGCAACAATGAAATTTAAAGTAAAAGGAAAATCCGTCGACTTTAAAAATCGTGAGGGTTCAAGTCCCTCCTATCCCCA
>WM19
ATCACTGACTAGCTGCTATTGAGCCCCATCTACAAATGGATAATTCTGTCTTAGTGGAGACGAGTTTTTGAAAATAACGGAGAAATACCGACTCTCTTGCAAGAGAGTCGGTATTTCTCCGTTATTTTTTATGTTTTTCTTTAGTAGTTTTTTATTTCTATCTTTTTTTTACGAAAAGTATTTTTATGCTTTTGCTTTGGAAGTGTCTGATATTTTTGTTATGGTTATGGGCTCATATTCGTTATGTACCAGTATAATAATATTAGTTATTTGTTAATCCCACTAATAAAGTTCTAATTTTATTAATTCGATTCTAATTTTCGAATTTTTTAGTTTTTTTAATATAAAATAAAAGAAAAGAGAAAGTTGTAATTTTATGCCTCTTAGATCTTCATTTCTATTTTAATCATTTCTATTTTAAATGGTAGAAATTGAAACCTTTTTATTAAATATTTTATTAAATAGAAATAAAAAAATTTTTAAATCGTGGAGGAAGGGGGGGCGGATGTAGCCAAGTGGATCAAGGCAGTGGATTGTGAATCCACCAAAAACGAACGAGCGTTGCATGACTGGTATGGACCTTACTTAAGTGATAACTTTCAAATTCAGAGAAACCCTGGAATCAAAAATGGGCAATCCTGAGCCAAATCCTGTTTTACAAGAACAAACAAGGGTTCAGAAAGCGAAAAAAAAAAAGGGGGATAGGTGCAGAAACTCAACGGAAGCTGTTCTAAAAAATGGGGTTGACTGCCTTTTTTGGTAAAGAAAGGAAAAAAAATCCTTCTATCGAATATCGAAACTCCATAAAGGATGAAGGATAAGCGTATATACACTATGTATACACAATGAAAAACTATCTCAAAAATGACAACCGAATCCGTATTTTTTTTTATGAAAAAAAAAAAAATTGTTATGAATCAATTCCAAGTTGAAAAAAAAATCGAATATTCATTGATCAAATCATTCACTCCATAGTCTGATCGATCTTTTCTTTTGAAAAACTGATTAATCGGACAAAAATAAAGATAGAGTCCCATTCTACATGTCAATATCAATACCGGCAACAATGAAATTTAAAGTAAAAGGAAAATCCGTCAACTTTAAAAATCGTGAGGGTTCAAGTCCTTTCTATCCCCAA
>WM20
CCACTGACTAGCTGCTATTGAGCCCCATCTACAAATGGATAATTCTGTCTTAGTGGAGACGAGTTTTTGAAAATAACGGAGAAATACCGACTCTCTTGCAAGAGAGTCGGTATTTCTCCGTTATTTTTTATGTTTTTCTTTAGTAGTTTTTTATTTCTATCTTTTTTTTACGAAAAGTATTTTTATGCTTTTGCTTTGATTTTGTCTGATATTTTTGTTATGGTTATGAGCTCATATTCGTTATGTACCAGTATAATAATATTAGTTATTTGTTAATCCCACTAATAAAGTTCTAATTTTATTAATTCGATTCTAATTTTCGAATTTTTTAGTTTTTTTAATATAAAATAAAAGAAAAGAGAAAGTTGTAATTTTATGCCTCTTAGATCTTCATTTCTATTTTAATCATTTCTATTTTAAATGGTAGAAATTGAAACCTTTTTATTAAATATTTTATTAAATACAAATAAAAAAATTTTTAAATCGTGGAGGAAGGGGGGGCGGATGTAGCCAAGTGGATCAAGGCAGTGGATTGTGAATCCACCATGAACGAAAACCCAAGGCATGAGCTGGTTGGAACCTACTAAGTGATAACTTTCAAATTCAGAGAAACCCTGGAATCAAAAATGGGCAATCCTGAGCCAAATCCTGTTTTACAAGAACAAACAAGGGTTCAGAAAGCGAAAAAAAAAAAGGGGGATAGGTGCAGAAACTCAACGGAAGCTGTTCTAAAAAATGGGGTTGACTGCCTTTTTTGGTAAAAAAAGGAAAAAAAATCCTTCTATCGAATATCGAAACTCCATAAAGGATGAAGGATAAGCGTATATACACTATGTATACACAATGAAAAACTATCTCAAAAATGACAACCGAATCCGTATTTTTTTTTATGAAAAAAAAAAAAATTGTTATGAATCAATTCCAAGTTGAAAAAAGAATCGAATATTCATTGATCAAATCATTCACTCCATAGTCTGATCGATCTTTTCTTTTGAAAAACTGATTAATCGGACAAAAATAAAGATAGAGTCCCATTCTACATGTCAATATCAATACCGGCAACAATGAAATTTAAAGTAAAAGGAAAATCCGTCAACTTTAAAAATCGTGAGGGTTCAAGTCCCTCTATCCCCA
>WM21
ATCACTGACTAGCTGCTATTGAGCCCCATCTACAAATGGATAATTCTGTCTTAGTGGAGACGAGTTTTTGAAAATAACGGAGAAATACCGACTCTCTTGCAAGAGAGTCGGTATTTCTCCGTTATTTTTTATGTTTTTCTTTAGTAGTTTTTTATTTCTATCTTTTTTTTACGAAAAGTATTTTTATGCTTTTGCTTTTATTTTGTCTGATATTTTTGTTATGGTTATGAGCTCATATTCGTTATGTACCAGTATAATAATATTAGTTATTTGTTAATCCCACTAATAAAGTTCTAATTTTATTAATTCGATTCTAATTTTCGAATTTTTTAGTTTTTTTAATATAAAATAAAAGAAAAGAGAAAGTTGTAATTTTATGCCTCTTAGATCTTCATTTCTATTTTAATCATTTCTATTTTAAATGGTAGAAATTGAAACCTTTTTATTAAAAATTTTATTAAATACAAATAAAAAAATTTTTAAATCGTGGAGGAAGGGGGGGCGGATGTGGCCAAGTGGATCAAGGCAGTGGATTGTGAATCCACCAAAGAGCGAGAGAAGAATTGGTTGGGCTGGTTGGAACCTACTAAGTGATAACTTTCAATTCAGAGAAACCCTGGAATCAAAAATGGGCAATCCTGAGCCAAATCCTGTTTTACAAGAACAAACAAGGGTTCAGAAAGCGAAAAAAAAAAAGGGGGATAGGTGCAAAAACTCAACGGAAGCTGTTCTAAAAAATGGGGTTGACTGCCTTTTTTGGTAAAAAAAGGAAAAAAAATCCTTCTATCGAATATCGAAACTCCATAAAGGATGAAGGATAAGCGTATATACACTATGTATACACAATGAAAAACTATCTCAAAAATGACAACCGAATCCGTATTTTTTTTTATGAAAAAAAAAAAAATTGTTATGAATCAATTCCAAGTTGAAAAAAGAATCGAATATTCATTGATCAAATCATTCACTCCATAGTCTGATCGATCTTTTCTTTTGAAAAACTGATTAATCGGACAAAAATAAAGATAGAGTCCCATTCTACATGTCAATATCAATACCGGCAACAATGAAATTTAAAGTAAGAGGAAAATCCGTCGACTTTAAAAATCGTGAGGGTTCAAGTCCCTCTATCCCCA
>WM22
CTCGTCTGACTAGCTGCTATTGAGCCCCATCTACAAATGGATAATTCTGTCTTAGTGGAGACGAGTTTTTGAAAATAACGGAGAAATACCGACTCTCTTGCAAGAGAGTCGGTATTTCTCCGTTATTTTTTATGTTTTTCTTTAGTAGTTTTTTATTTCTATCTTTTTTTTACGGGAAGTATTTTTATGCTTTTGCTTTGATTTTGTCTGATATTTTTGTTATGGTTATGGGCTCATATTCGTTATGTACCAGTATAATAATATTAGTTATTTGTTAATCCCACTAATAAAGTTCTAATTTTATTAATTCGATTCTAATTTTCGAATTTTTTAGTTTTTTTAATATAAAATAAAAGAAAAGAGAAAGTTGTAATTTTATGCCTCTTAGATCTTCATTTCTATTTTAATCATTTCTATTTTAAATGGTAGAAATTGAAACCTTTTTATTAAAAATTTTATTAAATACAAATAAAAAAATTTTTAAATCTTGGAGGAAGGGGGGGCGGATGTAGCCAAGTGGGACAAGGCAGTGGATTGTGAATCCACCATGAGCGAGAGAAGATGGGATGAGCTTGGTATGGAACCTACTAAGTGATAACTTTCAAATTCAGAGAAACCCTGGAATCAAAAATGGGCAATCCTGAGCCAAATCCTGTTTTACAAGAACAAACAAGGGTTCAGAAAGCGAAAAAAAAAAAGGGGGATAGGTGCAGAAACTCAACGGAAGCTGTTCTAAAAAATGGGGTTGACTGCCTTTTTTGGTAAAGAAAGGAAAAAAAATCCTTCTATCGAATATCGAAACTCCATAAAGGATGAAGGATAAGCGTATATACACTATGTATACACAATGAAAAACTATCTCAAAAATGACAACCGAATCCGTATTTTTTTTTATGAAAAAAAAAAAAATTGTTATGAATCAATTCCAAGTTGAAAAAAGAATCGAATATTCATTGATCAAATCATTCACTCCATAGTCTGATCGATCTTTTCTTTTGAAAAACTGATTAATCGGACAAAAATAAAGATAGAGTCCCATTCTACATGTCAATATCAATACCGGCAACAATGAAATTTAAAGTAAGAGGAAAATCCGTCGACTTTAAAAATCGTGAGGGTTCAAGTCCCTTCTATCCCCAA
>WM23
AATTCACTGACTAGCTGCTATTGAGCCCCATCTACAAATGGATAATTCTGTCTTAGTGGAGACGAGTTTTTGAAAATAACGGAGAAATACCGACTCTCTTGCAAGAGAGTCGGTATTTCTCCGTTATTTTTTATGTTTTTCCTTAGTAGTTTTTTATTTCTATCTTTTTTTTGGGGCAGTATTTTTATGCTTTTGCTTTGATTTTGTCTGATATTTTTGTTATGGTTAAGGGCTCATATTCGTTATGTACCAGTATAATAATATTAGTTATTTGTTAATCCCACTAATAAAGTTCTAATTTTATTAATTCGATTCTAATTTTCGAATTTTTTAGTTTTTTTAATATAAAATAAAAGAAAAGAGAAAGTTGTAATTTTATGCCTCTTAGATCTTCATTTCTATTTTAATCATTTCTATTTTAAATGGTAGAAATTGAAACCCTTTTATTAAATAATTTATTAAATACAAATAAAAAAATTTTTAAATCGTGGAGGAAGGGGGGGCGGATGTAGCCAAGTGGATCATGGCAAGGGATTGTTAATCCCCCATGCACGAGAACCTCGTTGGGGTGGAGCTTGGTATGGACCTACTAAGTGATAACTTTCAAATTCAGAGAAACCCTGGAATCAAAAATGGGCAATCCTGAGCCAAATCCTGTTTTACAAGAACAAACAAGGGTTCAGAAAGCGAAAAAAAAAAAGGGGGATAGGGGCAGAAACTCAACGGAAGCTGTTCTAAAAAAGGGGGTTGACTGCCTTTTTTGGTAAAGAAAGGAAAAGAAATCCTTCTATCGAATATCGAAACTCCATAAAGGATGAGGGATAAGCGTATATACACTATGTATACACAATGAAAAACTATCTCAAAAATGACAACCGAATCCGTATTTTTTTTTATGAAAAAAAAAAGAATTGTTATGAATCAATTCCAAGTTGAAAAAAGAATCGAATATTCTTTGATCAAATCATTCCCTCCATAGTCTGATCGATCTTTTCTTTTGAAAAACTGATTAATCGGACAAGAATAAAGATAGAGTCCCATTCTACATGTCAATATCAATACCGGCAACAATGAAATTTAGAGTAAGAGGAAAATCCGTCGACTTTAGAAATCGGGAGGGTTCAAGTCCCTCTATCCCCAA
>WM24
AAGTTCTCTGACTGCTGCTATTGAGCCCCATCTACAAATGGATAATTCTGTCTTAGTGGAGACGAGTTTTTGAAAATAACGGAGAAATACCGACTCTCTTGCAAGAGAGTCGGTATTTCTCCGTTATTTTTTATGTTTTTCTTTAGTAGTTTTTTATTTCTATCTTTTTTTTACGAAAAGTATTTTTATGCTTTTGCTTTGATTTTGTCTGATATTTTTGTTATGGTTATGGGCTCATATTCGTTATGTACCAGTATAATAATATTAGTTATTTGTTAATCCCACTAATAAAGTTCTAATTTTATTAATTCGATTCTAATTTTCGAATTTTTTAGTTTTTTTAATATAAAATAAAAGAAAAGAGAAAGTTGTAATTTTATGCCTCTTAGATCTTCATTTCTATTTTAATCATTTCTATTTTAAATGGTAGAAATTGAAACCTTTTTATTAAATATTTTATTAAATACAAATAAAAAAATTTTTAAATCGTGGAGGAAGGGGGGGCGGATGTAGCCAAGTGGATCAAGGCAGTGGATTGTGAATCCACCAAAACGCGAGGACTTTTTGGTTGAGCTTTGGTTGGAACCTACTAAGTGATAACTTTCAAATTCAGAGAAACCCTGGAATCAAAAATGGGCAATCCTGAGCCAAATCCTGTTTTACAAGAACAAACAAGGGTTCAGAAAGCGAAAAAAAAAAAGGGGGATAGGTGCAGAGACTCAACGGAAGCTGTTCTAAAAAATGGGGTTGACTGCCTTTTTTGGTAAAGAAAGGAAAAGAAATCCTTCTATCGAATATCGAAACTCCATAAAGGATGAAGGATAAGCGTATATACACTATGTATACACAATGAAAAACTATCTCAAAAATGACAACCGAATCCGTATTTTTTTTTATGAAAAAAAAAAAAATTGTTATGAATCAATTCCAAGTTGAAAAAAGAATCGAATATTCATTGATCAAATCATTCACTCCATAGTCTGATCGATCTTTTCTTTTGAAAAACTGATTAATCGGACAAAAATAAAGATAGAGTCCCATTCTACATGTCAATATCAATACCGGCAACAATGAAATTTAAAGTAAGAGGAAAATCCGTCGACTTTAAAAATCGTGAGGGTTCAAGTCCCTCTATCCCCA
>WM25
CGTCTCTGACTAGCTGCTATTGAGCCCCATCTACAAATGGATAATTCTGTCTTAGTGGAGACGAGTTTTTGAAAATAACGGAGAAATACCGACTCTCTTGCAAGAGAGTCGGTATTTCTCCGTTATTTTTTATGTTTTTCTTTAGTAGTTTTTTATTTCTATCTTTTTTTTACGAAAAGTATTTTTATGCTTTTGCTTTTATTTTGTCTGATATTTTTGTTATGGTTATGGGCTCATATTCGTTATGTACCAGTATAATAATATTAGTTATTTGTTAATCCCACTAATAAAGTTCTAATTTTATTAATTCGATTCTAATTTTCGAATTTTTTAGTTTTTTTAATATAAAATAAAAGAAAAGAGAAAGTTGTAATTTTATGCCTCTTAGATCTTCATTTCTATTTTAATCATTTCTATTTTAAATGGTAGAAATTGAAACCCTTTTATTAAAAATTTTATTAAATACAAATAAAAAAATTTTTAAATCGTGGAGGAAGGGGGGGCGGATGTGGCCAAGTGGATCAAGGCGGTGGATTGTGAATCCCCCAACAAGCGAGAGAGCAAATGGATGACTGGATGGAACCTACTAAGTGATAACTTTCAAATTCAGAGAAACCCTGGAATCAAAAATGGGCAATCCTGAGCCAAATCCTGTTTTACAAGAACAAACAAGGGTTCAGAAAGCGAAAAAAAAAAAGGGGGATAGGTGCAAAAACTCAACGGAAGCTGTTCTAAAAAATGGGGTTGACTGCCTTTTTTGGTAAAGAAAGGAAAAAAAATCCTTCTATCGAATATCGAAACTCCATAAAGGATGAAGGATAAGCGTATATACACTATGTATACACAATGAAAAACTATCTCAAAAATGACAACCGAATCCGTATTTTTTTTTATGAAAAAAAAAAAAATTGTTATGAATCAATTCCAAGTTGAAAAAAAAATCGAATATTCATTGATCAAATCATTCACTCCATAGTCTGATCGATCTTTTCTTTTGAAAAACTGATTAATCGGACAAAAATAAAGATAGAGTCCCATTCTACATGTCAATATCAATACCGGCAACAATGAAATTTAAAGTAAAAGGAAAATCCGTCGACTTTAAAAATCGTGAGGGTTCAAGTCCCTCTATCCCCAA
>WM26
ATCTCTGACTAGCTGCTATTGAGCCCCATCTACAAATGGATAATTCTGTCTTAGTGGAGACGAGTTTTTGAAAATAACGGAGAAATACCGACTCTCTTGCAAGAGAGTCGGTATTTCTCCGTTATTTTTTATGTTTTTCCTTAATAGTTTTTTATTTCTATCTTTTTTTTACGAAAAGTATTTTTATGCTTTTGCTTTGATTTTGTCTGATATTTTTGTTATGGTTATGGGCTCATATTCGTTATGTACCAGTATAATAATATTAGTTATTTGTTAATCCCACTAATAAAGTTCTAATTTTATTAATTCGATTCTAATTTTCGAATTTTTTAGTTTTTTTAATATAAAATAAAAGAAAAGAGAAAGTTGTAATTTTATGCCTCTTAGATCTTCATTTCTATTTTAATCATTTCTATTTTAAATGGTAGAAATTGAAACCTTTTTATTAAATATTTTATTAAATAGAAATAAAAAAATTTTTAAATCGTGGAGGAAGGGGGGGCGGATGTAGCCAAGTGGATCAAGGCAGTGGATTGTGAATCCACCAAAGAGCGAGAAAGGAGCTGGGCTTGGTTGGACCTACTAAGTGATAACTTTCAAATTCAGAGAAACCCTGGAATCAAAAATGGGCAATCCTGAGCCAAATCCTGTTTTACAAGAACAAACAAGGGTTCAGAAAGCGAAAAAAAAAAAGGGGGATAGGTGCAGAGACTCAACGGAAGCTGTTCTAAAAAATGGGGTTGACTGCCTTTTTTGGTAAAGAAAGGAAAAAAAATCCTTCTATCGAATATCGAAACTCCATAAAGGATGAAGGATAAGCGTATATACACTATGTATACACAATGAAAAACTATCTCAAAAATGACAACCGAATCCGTATTTTTTTTTATGAAAAAAAAAAAAATTGTTATGAATCAATTCCAAGTTGAAAAAAGAATCGAATATTCATTGATCAAATCATTCACTCCATAGTCTGATCGATCTTTTCTTTTGAAAAACTGATTAATCGGACAAAAATAAAGATAGAGTCCCATTCTACATGTCAATATCAATACCGGCAACAATGAAATTTAAAGTAAAAGGAAAATCCGTCGACTTTAAAAATCGTGAGGGTTCAAGTCCCTCCTATCCCCAA
>WM27
CATCTCTGACTAGCTGCTATTGAGCCCCATCTACAAATGGATAATTCTGTCTTAGTGGAGACGAGTTTTTGAAAATAACGGAGAAATACCGACTCTCTTGCAAGAGAGTCGGTATTTCTCCGTTATTTTTTATGTTTTTCCTTAATAGTTTTTTATTTCTATCTTTTTTTTACGAAAAGTATTTTTATGCTTTTGCTTTGATTTTGTCTGATATTTTTGTTATGGTTATGGGCTCATATTCGTTATGTACCAGTATAATAATATTAGTTATTTGTTAATCCCACTAATAAAGTTCTAATTTTATTAATTCGATTCTAATTTTCGAATTTTTTAGTTTTTTTAATATAAAATAAAAGAAAAGAGAAAGTTGTAATTTTATGCCTCTTAGATCTTCATTTCTATTTTAATCATTTCTATTTTAAATGGTAGAAATTGAAACCTTTTTATTAAATATTTTATTAAATAGAAATAAAAAAATTTTTAAATCGTGGAGGAAGGGGGGGCGGATGTAGCCAAGTGGATCAAGGCAGTGGATTGTGAATCCCCCATGCGCGAGCGACCCATGGCATGGCTGGTATGGACCTTACTTCAGTGATAACTTTTCAAATTCAGAGAAACCCTGGAATCAAAAATGGGCAATCCTGAGCCAAATCCTGTTTTACAAGAACAAACAAGGGTTCAGAAAGCGAAAAAAAAAAAGGGGGATAGGTGCAGAGACTCAACGGAAGCTGTTCTAAAAAATGGGGTTGACTGCCTTTTTTGGTAAAAAAAGGAAAAAAAATCCTTCTATCGAATATCGAAACTCCATAAAGGATGAAGGATAAGCGTATATACACTATGTATACACAATGAAAAACTATCTCAAAAATGACAACCGAATCCGTATTTTTTTTTATGAAAAAAAAAAAAATTGTTATGAATCAATTCCAAGTTGAAAAAAAAATCGAATATTCATTGATCAAATCATTCACTCCATAGTCTGATCGATCTTTTCTTTTGAAAAACTGATTAATCGGACAAAAATAAAGATAGAGTCCCATTCTACATGTCAATATCAATACCGGCAACAATGAAATTTAAAGTAAAAGGAAAATCCGTCGACTTTAAAAATCGTGAGGGTTCAAGTCCCTCTTTTCCCCA
>WM28
ATTCATCTGACTAGCTGCTATTGAGCCCCATCTACAAATGGATAATTCTGTCTTAGTGGAGACGAGTTTTTGAAAATAACGGAGAAATACCGACTCTCTTGCAAGAGAGTCGGTATTTCTCCGTTATTTTTTATGTTTTTCTTTAGTAGTTTTTTATTTCTATCTTTTTTTTACGAAAAGTATTTTTATGCTTTTGCTTTGATTTTGTCTGATATTTTTGTTATGGTTATGGGCTCATATTCGTTATGTACCAGTATAATAATATTAGTTATTTGTTAATCCCACTAATAAAGTTCTAATTTTATTAATTCGATTCTAATTTTCGAATTTTTTAGTTTTTTTAATATAAAATAAAAGAAAAGAGAAAGTTGTAATTTTATGCCTCTTAGATCTTCATTTCTATTTTAATCATTTCTATTTTAAATGGTAGAAATTGAAACCTTTTTATTAAATATTTTATTAAATAGAAATAAAAAAATTTTTAAATCGTGGAGGAAGGGGGGGCGGATGTAGCCAAGTGGATCAAGGCAGTGGATTGTGAATCCACCATGCGCGCATGCTGACTTGGTTGGAACCTTACTTAAGTGATAACTTTCAAATTCAGAGAAACCCTGGAATCAAAAATGGGCAATCCTGAGCCAAATCCTGTTTTACAAGAACAAACAAGGGTTCAGAAAGCGAAAAAAAAAAAGGGGGATAGGTGCAAAAACTCAACGGAAGCTGTTCTAAAAAATGGGGTTGACTGCCTTTTTTGGTAAAAAAAGGAAAAAAAATCCTTCTATCGAATATCGAAACTCCATAAAGGATGAAGGATAAGCGTATATACACTATGTATACACAATGAAAAACTATCTCAAAAATGACAACCGAATCCGTATTTTTTTTTATGAAAAAAAAAAAAATTGTTATGAATCAATTCCAAGTTGAAAAAAAAATCGAATATTCATTGATCAAATCATTCACTCCATAGTCTGATCGATCTTTTCTTTTGAAAAACTGATTAATCGGACAAAAATAAAGATAGAGTCCCATTCTACATGTCAATATCAATACCGGCAACAATGAAATTTAAAGTAAAAGGAAAATCCGTCGACTTTAAAAATCGTGAGGGTTCAAGTCCCTCTTAATCCCCAA
>WM29
GCTTTGACTAGCTGCTATTGAGCCCCATCTACAAATGGATAATTCTGTCTTAGTGGAGACGAGTTTTTGAAAATAACGGAGAAATACCGACTCTCTTGCAAGAGAGTCGGTATTTCTCCGTTATTTTTTATGTTTTTCCTTAGTAGTTTTTTATTTCTATCTTTTTTTTACGAAAAGTATTTTTATGCTTTTGCTTTGATTTTGTCTGATATTTTTGTTATGGTTATGGGCTCATATTCGTTATGTACCAGTATAATAATATTAGTTATTTGTTAATCCCACTAATAAAGTTCTAATTTTATTAATTCGATTCTAATTTTCGAATTTTTTAGTTTTTTTAATATAAAATAAAAGAAAAGAGAAAGTTGTAATTTTATGCCTCTTAGATCTTCATTTCTATTTTAATCATTTCTATTTTAAATGGTAGAAATTGAAACCTTTTTATTAAATATTTTATTAAATAGAAATAAAAAAATTTTTAAATCGTGGAGGAAGGGGGGGCGGATGTAGCCAAGTGGATCAAGGCAGTGGATTGTGAATCCACCAAAACGCGAGAGAAAAAAGGCTGGGCTGGTTGGAACCTACTAAGTGATAACTTTCAAATTCAGAGAAACCCTGGAATCAAAAATGGGCAATCCTGAGCCAAATCCTGTTTTACAAGAACAAACAAGGGTTCAGAAAGCGAAAAAAAAAAAGGGGGATAGGTGCAGAAACTCAACGGAAGCTGTTCTAAAAAATGGGGTTGACTGCCTTTTTTGGTAAAGAAAGGAAAAGAAATCCTTCTATCGAATATCGAAACTCCATAAAGGATGAAGGATAAGCGTATATACACTATGTATACACAATGAAAAACTATCTCAAAAATGACAACCGAATCCGTATTTTTTTTTATGAAAAAAAAAAAAATTGTTATGAATCAATTCCAAGTTGAAAAAAGAATCGAATATTCATTGATCAAATCATTCACTCCATAGTCTGATCGATCTTTTCTTTTGAAAAACTGATTAATCGGACAAAAATAAAGATAGAGTCCCATTCTACATGTCAATATCAATACCGGCAACAATGAAATTTAAAGTAAAAGGAAAATCCGTCGACTTTAAAAATCGTGAGGGTTCAAGTCCCTTCTTATCCCCAA
>WM30
ATCTCTGACTAGCTGCTATTGAGCCCCATCTACAAATGGATAATTCTGTCTTAGTGGAGACGAGTTTTTGAAAATAACGGAGAAATACCGACTCTCTTGCAAGAGAGTCGGTATTTCTCCGTTATTTTTTATGTTTTTCTTTAGTAGTTTTTTATTTCTATCTTTTTTTTACGAAAAGTATTTTTATGCTTTTGCTTTGATTTTGTCTGATATTTTTGTTATGGTTATGGGCTCATATTCGTTATGTACCAGTATAATAATATTAGTTATTTGTTAATCCCACTAATAAAGTTCTAATTTTATTAATTCGATTCTAATTTTCGAATTTTTTAGTTTTTTTAATATAAAATAAAAGAAAAGAGAAAGTTGTAATTTTATGCCTCTTAGATCTTCATTTCTATTTTAATCATTTCTATTTTAAATGGTAGAAATTGAAACCTTTTTATTAAATATTTTATTAAATACAAATAAAAAAATTTTTAAATCGTGGAGGAAGGGGGGGCGGATGTAGCCAAGTGGATCAAGGCAGTGGATTGTGAATCCCCCAAAACGCGAGAGACATGGCATGACTGGTATGGACCTTACTTAAGTGATTAACTTTTCAAATTCAGAGAAACCCTGGAATCAAAAATGGGCAATCCTGAGCCAAATCCTGTTTTACAAGAACAAACAAGGGTTCAGAAAGCGAAAAAAAAAAAGGGGGATAGGTGCAGAGACTCAACGGAAGCTGTTCTAAAAAATGGGGTTGACTGCCTTTTTTGGTAAAGAAAGGAAAAAAAATCCTTCTATCGAATATCGAAACTCCATAAAGGATGAAGGATAAGCGTATATACACTATGTATACACAATGAAAAACTATCTCAAAAATGACAACCGAATCCGTATTTTTTTTTATGAAAAAAAAAAAAATTGTTATGAATCAATTCCAAGTTGAAAAAAAAATCGAATATTCATTGATCAAATCATTCACTCCATAGTCTGATCGATCTTTTCTTTTGAAAAACTGATTAATCGGACAAAAATAAAGATAGAGTCCCATTCTACATGTCAATATCAATACCGGCAACAATGAAATTTAAAGTAAAAGGAAAATCCGTCAACTTTAAAAATCGTGAGGGTTCAAGTCCTCTTTATCCCCAAA
>YR01
ATCACTGACTAGCTGCTATTGAGCCCCATCTACAAATGGATAATTCTGTCTTAGTGGAGACGAGTTTTTGAAAATAACGGAGAAATACCGACTCTCTTGCAAGAGAGTCGGTATTTCTCCGTTATTTTTTATGTTTTTCTTTAGTAGTTTTTTATTTCTATCTTTTTTTTACGAAAAGTATTTTTATGCTTTTGCTTTAATTTTGTCTGATATTTTTGTTATGGTTATGGGCTCATATTCGTTATGTACCAGTATAATAATATTAGTTATTTGTTAATCCCACTAATAAAGTTCTAATTTTATTAATTCGATTCTAATTTTCGAATTTTTTAGTTTTTTTAATATAAAATAAAAGAAAAGAGAAAGTTGTAATTTTATGCCTCTTAGATCTTCATTTCTATTTTAAATGGTAGAAATTGAAACCTTTTTATTAAATATTTTATTAAATAGAAATAAAAAAAATTTTAAATCGTGGAGGAAGGGGGGGCGGATGTAGCCAAGTGGATCAAGGCAGTGGATTGTGAATCCACCATGCGCGACGAGTTTTTGCTATAAAGATGCGAAATCCACGGGCTCAACCGTGGAATTGCATTTGAGACTGGCAAGCTTGAGTCTTGGAGAGGGGGGTAGAATTCCAAGCGTAGAGCGGAAATGCTATAAAGATCTGGAGGAATACCGGAGACGAACGTTGCACCCTGGACAAACACTGACGCTCAGGTGCTAAAGCGGGTGCAGCAAACAGGATTAAATACCCTGGTATTTCCACGCTGTGAGCGAAGTCACTTGGGACGTTGCTCCCTTAGAGGAGCGGCTTTCCGGAGCGTTACGCGTGTAGACCACCGCTTGGGGAGTACGGTTGTCAGGTTATACTCATATGTATTGTCTGGGGGTCCCCCAAAGGGGTTTTGATGGCTTGGTATGGAACCTACTAAGTGATAACTTTCAAATTCAGAGAAACCCTGGAATCAAAAATGGGCAATCCTGAGCCAAATCCTGTTTTACAAGAACAAACAAGGGTTCAGAAAGCGAAAAAAAAAAAGGGGGATAGGTGCAGAGACTCAACGGAAGCTGTTCTAAGAAATGGGGTTGACTGCCTTTTTTGGTAAAGAAAGGAAAAGAAATCCTTCTATCGAATATCGAAACTCCATAAAGGATGAAGGATAAGCGTATATACACTATGTATACACAATGAAAAACTATCTCAAAAATGACAACCGAATCCGTATTTTTTTTTATGAAAAAAAAAAGAATTGTTATGAATCAATTCCAAGTTGAAGAAAGAATCGAATATTCATTGATCAAATCATTCACTCCATAGTCTGATCGATCTTTTCTTTTGAAGAACTGATTAATCGGACAAGAATAAAGATAGAGTCCCATTCTACATGTCAATATCAATACCGGCAACAATGAAATTTAGAGTAAGAGGAAAATCCGTCGACTTTAGAAATCGTGAGGGTTCAAGTCCCCCTTTCCCCAA
>YR02
ATTCACTGACTAGCTGCTATTGAGCCCCATCTACAAATGGATAATTCTGTCTTAGTGGAGACGAGTTTTTGAAAATAACGGAGAAATACCGACTCTCTTGCAAGAGAGTCGGTATTTCTCCGTTATTTTTTATGTTTTTCTTTAGTAGTTTTTTATTTCTATCTTTTTTTTACGAAAAGTATTTTTATGCTTTTGCTTTGATTTTGTCTGATATTTTTGTTATGGTTATGGGCTCATATTCGTTATGTACCAGTATAATAATATTAGTTATTTGTTAATCCCACTAATAAAGTTCTAATTTTATTAATTCGATTCTAATTTTCGAATTTTTTAGTTTTTTTAATATAAAATAAAAGAAAAGAGAAAGTTGTAATTTTATGCCTCTTAAATCTTCATTTCTATTTTAAATGGTAGAAATTGAAACCTTTTTATTAAATATTTTATTAAATAGAAATAAAAAAAATTTTAAATCGTGGAGGAAGGGGGGGCGGATGTAGCCAAGTGGATCAAGGCAGTGGATTGTGAATCCACCATGCACGAAAAAGCATGGCATGACTGGTTGGACCTACTAAGTGATAACTTTCAAATTCAGAGAAACCCTGGAATCAAAAATGGGCAATCCTGAGCCAAATCCTGTTTTACAAGAACAAACAAGGGTTCAGAAAGCGAAAAAAAAAAAGGGGGATAGGTGCAGAGACTCAACGGAAGCTGTTCTAAAAAATGGGGTTGACTGCCTTTTTTGGTAAAAAAAGGAAAAAAAATCCTTCTATCGAATATCGAAACTCCATAAAGGATGAAGGATAAGCGTATATACACTATGTATACACAATGAAAAACTATCTCAAAAATGACAACCGAATCCGTATTTTTTTTTATGAAAAAAAAAAAAATTGTTATGAATCAATTCCAAGTTGAAAAAAAAATCGAATATTCATTGATCAAATCATTCACTCCATAGTCTGATCGATCTTTTCTTTTGAAAAACTGATTAATCGGACAAAAATAAAAATAGAGTCCCATTCTACATGTCAATATCAATACCGGCAACAATGAAATTTAAAGTAAAAGGAAAATCCGTCAACTTTAAAAATCGTGAGGGTTCAAGTCCCTCTTATCCCCAA
>YR03
TTCTCTGACTAGCTGCTATTGAGCCCCATCTACAAATGGATAATTCTGTCTTAGTGGAGACGAGTTTTTGAAAATAACGGAGAAATACCGACTCTCTTGCAAGAGAGTCGGTATTTCTCAGTTATTTTTTATGTTTTTCTTTAGTAGTTTTTTATTTCTATCTTTTTTTTACGAAAAGTATTTTTATGCTTTTGCTTTGATTTTGTCTGATATTTTTGTTATGGTTATGAGCTCATATTCGTTATGTACCAGTATAATAATATTAGTTATTTGTTAATCCCACTAATAAAGTTCTAATTTTATTAATTCGATTCTAATTTTCGAATTTTTTAGTTTTTTTAATATAAAATAAAAGAAAAGAGAAAGTTGTAATTTTATGCCTCTTAGATCTTCATTTCTATTTTAAATGGTAGAAATTGAAACCTTTTTATTAAATATTTTATTAAATAGAAATAAAAAAAATTTTAAATCGTGGAGGAAGGGGGGGCGGATGTAGCCAAGTGGATCAAGGCAGTGGATTGTGAATCCACCATGCGCGAGGGATGCATGAGCTTGGTATGGAACTACTAAGTGATAACTTTCAAATTCAGAGAAACCCTGGAATCAAAAATGGGCAATCCTGAGCCAAATCCTGTTTTACAAGAACAAACAAGGGTTCAGAAAGCGAAAAAAAAAAAGGGGGATAGGTGCAGAGACTCAACGGAAGCTGTTCTAAGAAATGGGGTTGACTGCCTTTTTTGGTAAAGAAAGGAAAAGAAATCCTTCTATCGAATATCGAAACTCCATAAAGGATGAAGGATAAGCGTATATACACTATGTATACACAATGAAAAACTATCTCAAAAATGACAACCGAATCCGTATTTTTTTTTATGAAAAAAAAAAAAATTGTTATGAATCAATTCCAAGTTGAAAAAAGAATCGAATATTCATTGATCAAATCATTCACTCCATAGTCTGATCGATCTTTTCTTTTGAAGAACTGATTAATCGGACAAGAATAAAGATAGAGTCCCATTCTACATGTCAATATCAATACCGGCAACAATGAAATTTAAAGTAAGAGGAAAATCCGTCGACTTTAGAAATCGTGAGGGTTCAAGTCCCTCCTTTCCCCA
>YR04
ATTGTCTGACTAGCTGCTATTGAAGCCCCATCTACAAATGGATAATTCTGTCTTAGTGGAGACGAGTTTTTGAAAATAACGGAGAAATACCGACTCTCTTGCAAGAGAGTCGGTATTTCTCAGTTATTTTTTATGTTTTTCTTTAGTAGTTTTTTATTTCTATCTTTTTTTTACGAAAAGTATTTTTATGCTTTTGCTTTGATTTTGTCTGATATTTTTGTTATGGTTATGAGCTCATATTCGTTATGTACCAGTATAATAATATTAGTTATTTGTTAATCCCACTAATAAAGTTCTAATTTTATTAATTCGATTCTAATTTTCGAATTTTTTAGTTTTTTTAATATAAAATAAAAGAAAAGAGAAAGTTGTAATTTTATGCCTCTTAGATCTTCATTTCTATTTTAAATGGTAGAAATTGAAACCTTTTTATTAAATATTTTATTAAATAGAAATAAAAAAAATTTTAAATCGTGGAGGAAGGGGGGGCGGATGTAGCCAAGTGGATCAAGGCAGTGGATTGTGAATCCACCATGCGCGATTGCTGGCTTGGTATGGAACCTACTAAGTGATAACTTTCAAATTCAGAGAAACCCTGGAATCAAAAATGGGCAATCCTGAGCCAAATCCTGTTTTACAAGAACAAACAAGGGTTCAGAAAGCGAAAAAAAAAAAGGGGGATAGGTGCAGAGACTCAACGGAAGCTGTTCTAAGAAATGGGGTTGACTGCCTTTTTTGGTAAAGAAAGGAAAAGAAATCCTTCTATCGAATATCGAAACTCCATAAAGGATGAAGGATAAGCGTATATACACTATGTATACACAATGAAAAACTATCTCAAAAATGACAACCGAATCCGTATTTTTTTTTATGAAAAAAAAAAAAATTGTTATGAATCAATTCCAAGTTGAAGAAAGAATCGAATATTCATTGATCAAATCATTCACTCCATAGTCTGATCGATCTTTTCTTTTGAAGAACTGATTAATCGGACAAAAATAAAGATAGAGTCCCATTCTACATGTCAATATCAATACCGGCAACAATGAAATTTAGAGTAAGAGGAAAATCCGTCGACTTTAGAAATCGTGAGGGTTCAAGTCCCCCTTTCCCCCAA
>YR05
CTTCTTGACTAGCTGCTATTGAGCCCCATCTACAAATGGATAATTCTGTCTTAGTGGAGACGAGTTTTTGAAAATAACGGAGAAATACCGACTCTCTTGCAAGAGAGTCGGTATTTCTCAGTTATTTTTTATGTTTTTCTTTAGTAGTTTTTTATTTCTATCTTTTTTTTACGAAAAGTATTTTTATGCTTTTGCTTTGATTTTGTCTGATATTTTTGTTATGGTTATGGGCTCATATTCGTTATGTACCAGTATAATAATATTAGTTATTTGTTAATCCCACTAATAAAGTTCTAATTTTATTAATTCGATTCTAATTTTCGAATTTTTTAGTTTTTTTAATATAAAATAAAAGAAAAGAGAAAGTTGTAATTTTATGCCTCTTAGATCTTCATTTCTATTTTAAATGGTAGAAATTGAAACCTTTTTATTAAATATTTTATTAAATAGAAATAAAAAAAATTTTAAATCTTGGAGGAAGGGGGGGCGGATGTAGCCAAGTGGATCAAGGCAGTGGATTGTGAATCCACCATGACCGAGGAGGCTTGGGATGACTGGTATGGACCTTACTTAAGTGATAACTTTTCAATTCAGAGAAACCCTGGAATCAAAAATGGGCAATCCTGAGCCAAATCCTGTTTTACAAGAACAAACAAGGGTTCAGAAAGCGAAAAAAAAAAAGGGGGATAGGTGCAGAGACTCAACGGAAGCTGTTCTAAGAAATGGGGTTGACTGCCTTTTTTGGTAAAGAAAGGAAAAAAAATCCTTCTATCGAATATCGAAACTCCATAAAGGATGAAGGATAAGCGTATATACACTATGTATACACAATGAAAAACTATCTCAAAAATGACAACCGAATCCGTATTTTTTTTTATGAAAAAAAAAAAAATTGTTATGAATCAATTCCAAGTTGAAAAAAAAATCGAATATTCATTGATCAAATCATTCACTCCATAGTCTGATCGATCTTTTCTTTTGAAAAACTGATTAATCGGACAAAAATAAAGATAGAGTCCCATTCTACATGTCAATATCAATACCGGCAACAATGAAATTTAAAGTAAAAGGAAAATCCGTCGACTTTAAAAATCGTGAGGGTTCAAGTCCCTCTTATTCCCCAA
>YR06
TACAGACTAGCTGCTATTGAGCCCCATCTACAAATGGATAATTCTGTCTTAGTGGAGACGAGTTTTTGAAAATAACGGAGAAATACCGACTCTCTTGCAAGAGAGTCGGTATTTCTCCGTTATTTTTTATGTTTTTCTTTAGTAGTTTTTTATTTCTATCTTTTTTTTACGAAAATTATTTTTATGCTTTTGCTTTGGTTTGTCTGATATTTTTGTTATGGTTATGGGCTCATATTCGTTATGTACCAGTATAATAATATTAGTTATTTGTTAATCCCACTAATAAAGTTCTAATTTTATTAATTCGATTCTAATTTTCGAATTTTTTAGTTTTTTTAATATAAAATAAAAGAAAAGAGAAAGTTGTAATTTTATGCCTCTTAAAACTTCATTTCTATTTTAAATGGTAGAAATTGAAACCTTTTTATTAAATATTTTATTAAATACAAATAAAAAAAATTTTAAATCTTGGAGGAAGGGGGGGCGGATGTAGCCAAGTGGATCAAGGCAGTGGATTGTGAATCCACCAAGAGCGAGAAAATCTTGTCCCGTCGGTCGCCCCATTTTTTGAGGCCCAGATTGTCAAATCCACCAAGCAGGGATGCCATGAGCTTGGTATGGAACCTACTAAGTGATAACTTTCAAATTCAGAGAAACCCTGGAATCAAAAATGGGCAATCCTGAGCCAAATCCTGTTTTACAAGAACAAACAAGGGTTCAGAAAGCGAAAAAAAAAAAGGGGGATAGGTGCAGAGACTCAACGGAAGCTGTTCTAAGAAATGGGGTTGACTGCCTTTTTTGGTAAAGAAAGGAAAAGAAATCCTTCTATCGAATATCGAAACTCCATAAAGGATGAAGGATAAGCGTATATACACTATGTATACACAATGAAAAACTATCTCAAAAATGACAACCGAATCCGTATTTTTTTTTATGAAAAAAAAAAAAATTGTTATGAATCAATTCCAAGTTGAAAAAAGAATCGAATATTCATTGATCAAATCATTCACTCCATAGTCTGATCGATCTTTTCTTTTGAAAAACTGATTAATCGGACAAGAATAAAGATAGAGTCCCATTCTACATGTCAATATCAATACCGGCAACAATGAAATTTAGAGTAAGAGGAAAATCCGTCGACTTTAGAAATCGTGAGGGTTCAAGTCCTTCTTTTCCCCA
>YR07
AGTCTCTGACTAGCTGCTATTGAGCCCCATCTACAAATGGATAATTCTGTCTTAGTGGAGACGAGTTTTTGAAAATAACGGAGAAATACCGACTCTCTTGCAAGAGAGTCGGTATTTCTCCGTTATTTTTTATGTTTTTCTTTAGTAGTTTTTTATTTCTATCTTTTTTTTACGAAAAGTATTTTTATGCTTTTGCTTTTATTTTGTCTGATATTTTTGTTATGGTTATGGGCTCATATTCGTTATGTACCAGTATAATAATATTAGTTATTTGTTAATCCCACTAATAAAGTTCTAATTTTATTAATTCGATTCTAATTTTCGAATTTTTTAGTTTTTTTAATATAAAATAAAAGAAAAGAGAAAGTTGTAATTTTATGCCTCTTAAATCTTCATTTCTATTTTAAATGGGAGAAATTGAAACCTTTTTATTAAAAATTTTATTAAATAGAAATAAAAAAAATTTTAAATCGTGGAGGAAGGGGGGGCGGATGTAGCCAAGTGGATCAAGGCAGTGGATTGTGAATCCCCCATGAACGAGAACGCATGCATGACTTGGTATGGAACCTACTAAGTGATAACTTTCAAATTCAGAGAAACCCTGGAATCAAAAATGGGCAATCCTGAGCCAAATCCTGTTTTACAAGAACAAACAAGGGTTCAGAAAGCGAAAAAAAAAAAGGGGGATAGGTGCAGAGACTCAACGGAAGCTGTTCTAAAAAATGGGGTTGACTGCCTTTTTTGGTAAAAAAAGGAAAAAAAATCCTTCTATCGAATATCGAAACTCCATAAAGGATGAAGGATAAGCGTATATACACTATGTATACACAATGAAAAACTATCTCAAAAATGACAACCGAATCCGTATTTTTTTTTATGAAAAAAAAAAGAATTGTTATGAATCAATTCCAAGTTGAAAAAAGAATCGAATATTCATTGATCAAATCATTCACTCCATAGTCTGATCGATCTTTTCTTTTGAAAAACTGATTAATCGGACAAAAATAAAGATAGAGTCCCATTCTACATGTCAATATCAATACCGGCAACAATGAAATTTAAAGTAAGAGGAAAATCCGTCGACTTTAAAAATCGTGAGGGTTCAAGTCCTCCTATCCCCAA
>YR08
TCACAGACTAGCTGCTATTGAGCCCCATCTACAAATGGATAATTCTGTCTTAGTGGAGACGAGTTTTTGAAAATAACGGAGAAATACCGACTCTCTTGCAAGAGAGTCGGTATTTCTCCGTTATTTTTTATGTTTTTCTTTAGTAGTTTTTTATTTCTATCTTTTTTTTACGAAAAGTATTTTTATGCTTTTGCTTTGGATTGTCTGATATTTTTGTTATGGTTATGGGCTCATATTCGTTATGTACCAGTATAATAATATTAGTTATTTGTTAATCCCACTAATAAAGTTCTAATTTTATTAATTCGATTCTAATTTTCGAATTTTTTAGTTTTTTTAATATAAAATAAAAGAAAAGAGAAAGTTGTAATTTTATGCCTCTTAAAACTTCATTTCTATTTTAAATGGTAGAAATTGAAACCTTTTTATTAAATATTTTATTAAATACAAATAAAAAAAATTTTAAATCTTGGAGGAAGGGGGGGCGGATGTAGCCAAGTGGATCAAGGCAGTGGATTGTGTATCCCCCATCACCGAGAGACACCAAGTCCCATCATAAGCCCATTTTGTTATGGCCTAGATTGAGAAACTACAAACCAGGAGTTGATGCATGAGCTTGGTATGGAACCTACTAAGTGATAACTTTCAAATTCAGAGAAACCCTGGAATCAAAAATGGGCAATCCTGAGCCAAATCCTGTTTTACAAGAACAAACAAGGGTTCAGAAAGCGAAAAAAAAAAAGGGGGATAGGTGCAGAGACTCAACGGAAGCTGTTCTAAAAAATGGGGTTGACTGCCTTTTTTGGTAAAGAAAGGAAAAAAAATCCTTCTATCGAATATCGAAACTCCATAAAGGATGAAGGATAAGCGTATATACACTATGTATACACAATGAAAAACTATCTCAAAAATGACAACCGAATCCGTATTTTTTTTTATGAAAAAAAAAAAAATTGTTATGAATCAATTCCAAGTTGAAAAAAGAATCGAATATTCATTGATCAAATCATTCACTCCATAGTCTGATCGATCTTTTCTTTTGAAAAACTGATTAATCGGACAAAAATAAAGATAGAGTCCCATTCTACATGTCAATATCAATACCGGCAACAATGAAATTTAAAGTAAGAGGAAAATCCGTCGACTTTAAAAATCGTGAGGGTTCAAGTCCTCTTTTTCCCCA
>YR09
CCCTGACTAGCTGCTATTGAGCCCCATCTACAAATGGATAATTCTGTCTTAGTGGAGACGAGTTTTTGAAAATAACGGAGAAATACCGACTCTCTTGCAAGAGAGTCGGTATTTCTCCGTTATTTTTTATGTTTTTCTTTAGTAGTTTTTTATTTCTATCTTTTTTTTACGAAAAGTATTTTTATGCTTTTGCTTTTATTTTGTCTGATATTTTTGTTATGGTTATGGGCTCATATTCGTTATGTACCAGTATAATAATATTAGTTATTTGTTAATCCCACTAATAAAGTTCTAATTTTATTAATTCGATTCTAATTTTCGAATTTTTTAGTTTTTTTAATATAAAATAAAAGAAAAGAGAAAGTTGTAATTTTATGCCTCTTAAATCTTCATTTCTATTTTAAATGGTAGAAATTGAAACCTTTTTATTAAATATTTTATTAAATACAAATAAAAAAAATTTTAAATCGTGGAGGAAGGGGGGGCGGATGTAGCCAAGTGGATCAAGGCAGTGGATTGTGAATCCACCATGACGCGAGAGAGTTCAATTCCCGTTGTTCGCCCATTTGTTGAAACCCCGGATTGTGAATCCACCATGCACGTTTTTTAAATCATGGACAAATTTCCGACTCTTTTTTGGCATGAGCTTGGATGGAACCTACTAAGTGATAACTTTCAAATTCAGAGAAACCCTGGAATCAAAAATGGGCAATCCTGAGCCAAATCCTGTTTTACAAGAACAAACAAGGGTTCAGAAAGCGAAAAAAAAAAAGGGGGATAGGTGCAGAGACTCAACGGAAGCTGTTCTAAGAAATGGGGTTGACTGCCTTTTTTGGTAAAGAAAGGAAAAAAAATCCTTCTATCGAATATCGAAACTCCATAAAGGATGAAGGATAAGCGTATATACACTATGTATACACAATGAAAAACTATCTCAAAAATGACAACCGAATCCGTATTTTTTTTTATGAAAAAAAAAAAAATTGTTATGAATCAATTCCAAGTTGAAAAAAGAATCGAATATTCATTGATCAAATCATTCACTCCATAGTCTGATCGATCTTTTCTTTTGAAAAACTGATTAATCGGACAAAAATAAAGATAGAGTCCCATTCTACATGTCAATATCAATACCGGCAACAATGAAATTTAAAGTAAGAGGAAAATCCGTCAACTTTAAAAATCGGGAGGGTTCAAGTCTTTTTTATCCCCCCAA
>YR10
ATCTCTGACTAGCTGCTATTGAGCCCCATCTACAAATGGATAATTCTGTCTTAGTGGAGACGAGTTTTTGAAAATAACGGAGAAATACCGACTCTCTTGCAAGAGAGTCGGTATTTCTCCGTTATTTTTTATGTTTTTCTTTAGTAGTTTTTTATTTCTATCTTTTTTTTACGAAAAGTATTTTTATGCTTTTGCTTTGGTTTGTCTGATATTTTTGTTATGGTTATGGGCTCATATTCGTTATGTACCAGTATAATAATATTAGTTATTTGTTAATCCCACTAATAAAGTTCTAATTTTATTAATTCGATTCTAATTTTCGAATTTTTTAGTTTTTTTAATATAAAATAAAAGAAAAGAGAAAGTTGTAATTTTATGCCTCTTAAAACTTCATTTCTATTTTAAATGGTAGAAATTGAAACCTTTTTATTAAAAATTTTATTAAATACAAATAAAAAAAATTTTAAATCTTGGAGGAAGGGGGGGCGGATGTAGCCAAGTGGATCAAGGCAGTGGATTGTGAATCCACCAAGAGCGAAGGAGCCGATGCATGAGCTGGTATGGAACCTACTAAGTGATAACTTTCAAATTCAGAGAAACCCTGGAATCAAAAATGGGCAATCCTGAGCCAAATCCTGTTTTACAAGAACAAACAAGGGTTCAGAAAGCGAAAAAAAAAAAGGGGGATAGGTGCAGAGACTCAACGGAAGCTGTTCTAAAAAATGGGGTTGACTGCCTTTTTTGGTAAAGAAAGGAAAAGAAATCCTTCTATCGAATATCGAAACTCCATAAAGGATGAAGGATAAGCGTATATACACTATGTATACACAATGAAAAACTATCTCAAAAATGACAACCGAATCCGTATTTTTTTTTATGAAAAAAAAAAAAATTGTTATGAATCAATTCCAAGTTGAAAAAAGAATCGAATATTCATTGATCAAATCATTCACTCCATAGTCTGATCGATCTTTTCTTTTGAAAAACTGATTAATCGGACAAAAATAAAGATAGAGTCCCATTCTACATGTCAATATCAATACCGGCAACAATGAAATTTAAAGTAAAAGGAAAATCCGTCAACTTTAAAAATCGGGAGGGTTCAAGTCCTTTTTTCCCCCAA
>YR11
CCTCACTGACTAGCTGCTATTGAGCCCCATCTACAAATGGATAATTCTGTCTTAGTGGAGACGAGTTTTTGAAAATAACGGAGAAATACCGACTCTCTTGCAAGAGAGTCGGTATTTCTCAGTTATTTTTTATGTTTTTCTTTAGTAGTTTTTTATTTCTATCTTTTTTTTACGGGCAGTATTTTTATGCTTTTGCTTTGATTTTGTCTGATATTTTTGTTATGGTTATGGGCTCATATTCGTTATGTACCAGTATAATAATATTAGTTATTTGTTAATCCCACTAATAAAGTTCTAATTTTATTAATTCGATTCTAATTTTCGAATTTTTTAGTTTTTTTAATATAAAATAAAAGAAAAGAGAAAGTTGTAATTTTATGCCTCTTAAATCTTCATTTCTATTTTAAATGGTAGAAATTGAAACCTTTTTATTAAATATTTTATTAAATAGAAATAAAAAAAATTTTAAATCGTGGAGGAAGGGGGGGCGGATGTAGCCAAGTGGATCAAGGCAGTGGATTGTGAATCCACCATGAACGACTAATGCCATGAGCTTGGTATGGAACCTACTAAGTGATAACTTTCAAATTCAGAGAAACCCTGGAATCAAAAATGGGCAATCCTGAGCCAAATCCTGTTTTACAAGAACAAACAAGGGTTCAGAAAGCGAAAAAAAAAAAGGGGGATAGGTGCAGAGACTCAACGGAAGCTGTTCTAAGAAATGGGGTTGACTGCCTTTTTTGGTAAAGAAAGGAAAAGAAATCCTTCTATCGAATATCGAAACTCCATAAAGGATGAAGGATAAGCGTATATACACTATGTATACACAATGAAAAACTATCTCAAAAATGACAACCGAATCCGTATTTTTTTTTATGAAAAAAAAAAAAATTGTTATGAATCAATTCCAAGTTGAAAAAAGAATCGAATATTCATTGATCAAATCATTCACTCCATAGTCTGATCGATCTTTTCTTTTGAAAAACTGATTAATCGGACAAAAATAAAGATAGAGTCCCATTCTACATGTCAATATCAATACCGGCAACAATGAAATTTAGAGTAAGAGGAAAATCCGTCGACTTTAAAAATCGTGAGGGTTCAAGTCCTTTTTTCCCCAAA
>YR12
TCGCTGACTAGACTGCTATTGAGCCCCATCTACAAATGGATAATTCTGTCTTAGTGGAGACGAGTTTTTGAAAATAACGGAGAAATACCGACTCTCTTGCAAGAGAGTCGGTATTTCTCCGTTATTTTTTATGTTTTTCTTTAGTAGTTTTTTATTTCTATCTTTTTTTTACGAAAAGTATTTTTATGCTTTTGCTTTGATTTTGTCTGATATTTTTGTTATGGTTATGAGCTCATATTCGTTATGTACCAGTATAATAATATTAGTTATTTGTTAATCCCACTAATAAAGTTCTAATTTTATTAATTCGATTCTAATTTTCGAATTTTTTAGTTTTTTTAATATAAAATAAAAGAAAAGAGAAAGTTGTAATTTTATGCCTCTTAGATCTTCATTTCTATTTTAAATGGTAGAAATTGAAACCTTTTTATTAAATATTTTATTAAATAGAAATAAAAAAAATTTTAAATCTTGGAGGAAGGGGGGGCGGATGTAGCCAAGTGGATCAAGGCAGTGGATTGTGAATCCACCAAGAACGAGAACGGATTGCTGAGCTTGGTATGGAACCTACTAAGTGATAACTTTCAAATTCAGAGAAACCCTGGAATCAAAAATGGGCAATCCTGAGCCAAATCCTGTTTTACAAGAACAAACAAGGGTTCAGAAAGCGAAAAAAAAAAAGGGGGATAGGTGCAGAGACTCAACGGAAGCTGTTCTAAAAAATGGGGTTGACTGCCTTTTTTGGTAAAGAAAGGAAAAGAAATCCTTCTATCGAATATCGAAACTCCATAAAGGATGAAGGATAAGCGTATATACACTATGTATACACAATGAAAAACTATCTCAAAAATGACAACCGAATCCGTATTTTTTTTTATGAAAAAAAAAAAAATTGTTATGAATCAATTCCAAGTTGAAAAAAGAATCGAATATTCATTGATCAAATCATTCACTCCATAGTCTGATCGATCTTTTCTTTTGAAAAACTGATTAATCGGACAAAAATAAAGATAGAGTCCCATTCTACATGTCAATATCAATACCGGCAACAATGAAATTTAAAGTAAGAGGAAAATCCGTCGACTTTAAAAATCGGGAGGGTTCAAGTCCCTCTTTTCCCAA
>YR13
ACTTCACTGACTAGCTGCTATTGAGCCCCATCTACAAATGGATAATTCTGTCTTAGTGGAGACGAGTTTTTGAAAATAACGGAGAAATACCGACTCTCTTGCAAGAGAGTCGGTATTTCTCCGTTATTTTTTATGTTTTTCTTTAGTAGTTTTTTATTTCTATCTTTTTTTTACGGGCAGTATTTTTATGCTTTTGCTTTGATTTTGTCTGATATTTTTGTTATGGTTATGGGCTCATATTCGTTATGTACCAGTATAATAATATTAGTTATTTGTTAATCCCACTAATAAAGTTCTAATTTTATTAATTCGATTCTAATTTTCGAATTTTTTAGTTTTTTTAATATAAAATAAAAGAAAAGAGAAAGTTGTAATTTTATGCCTCTTAAATCTTCATTTCTATTTTAAATGGTAGAAATTGAAACCTTTTTATTAAATATTTTATTAAATAGAAATAAAAAAAATTTTAAATCGTGGAGGAAGGGGGGGCGGATGTAGCCAAGTGGATCAAGGCAGTGGATTGTGAATCCACCATGACCGAAGACCTCGCGATGCATGAGCTTGGTATGGAACCTACTAAGTGATAACTTTCAAATTCAGAGAAACCCTGGAATCAAAAATGGGCAATCCTGAGCCAAATCCTGTTTTACAAGAACAAACAAGGGTTCAGAAAGCGAAAAAAAAAAAGGGGGATAGGTGCAGAGACTCAACGGAAGCTGTTCTAAGAAATGGGGTTGACTGCCTTTTTTGGTAAAGAAAGGAAAAGAAATCCTTCTATCGAATATCGAAACTCCATAAAGGATGAAGGATAAGCGTATATACACTATGTATACACAATGAAAAACTATCTCAAAAATGACAACCGAATCCGTATTTTTTTTTATGAAAAAGAAAAGAATTGTTATGAATCAATTCCAAGTTGAAAAAAGAATCGAATATTCATTGATCAAATCATTCACTCCATAGTCTGATCGATCTTTTCTTTTGAAAAACTGATTAATCGGACAAGAATAAAGATAGAGTCCCATTCTACATGTCAATATCAATACCGGCAACAATGAAATTTAAAGTAAGAGGAAAATCCGTCGACTTTAAAAATCGTGAGGGTTCAAGTCCCTCTTTCCCCCAA
>YR14
ATCTCTGACTAGCTGCTATTGAGCCCCATCTACAAATGGATAATTCTGTCTTAGTGGAGACGAGTTTTTGAAAATAACGGAGAAATACCGACTCTCTTGCAAGAGAGTCGGTATTTCTCCGTTATTTTTTATGTTTTTCTTTAGTAGTTTTTTATTTCTATCTTTTTTTTACGAAAAGTATTTTTATGCTTTTGCTTTGGTTTGTCTGATATTTTTGTTATGGTTATGGGCTCATATTCGTTATGTACCAGTATAATAATATTAGTTATTTGTTAATCCCACTAATAAAGTTCTAATTTTATTAATTCGATTCTAATTTTCGAATTTTTTAGTTTTTTTAATATAAAATAAAAGAAAAGAGAAAGTTGTAATTTTATGCCTCTTAAATCTTCATTTCTATTTTAAATGGTAGAAATTGAAACCTTTTTATTAAATATTTTATTAAATACAAATAAAAAAAATTTTAAATCTTGGAGGAAGGGGGGGCGGATGTAGCCAAGTGGATCAAGGCAGTGGATTGTGAATCCACCAAGAACGACAAGTGAATGCATGACTTGGTATGGAACCTACTAAGTGATAACTTTCAAATTCAGAGAAACCCTGGAATCAAAAATGGGCAATCCTGAGCCAAATCCTGTTTTACAAGAACAAACAAGGGTTCAGAAAGCGAAAAAAAAAAAGGGGGATAGGTGCAGAGACTCAACGGAAGCTGTTCTAAGAAATGGGGTTGACTGCCTTTTTTGGTAAAGAAAGGAAAAGAAATCCTTCTATCGAATATCGAAACTCCATAAAGGATGAAGGATAAGCGTATATACACTATGTATACACAATGAAAAACTATCTCAAAAATGACAACCGAATCCGTATTTTTTTTTATGAAAAAAAAAAAAATTGTTATGAATCAATTCCAAGTTGAAAAAAGAATCGAATATTCATTGATCAAATCATTCACTCCATAGTCTGATCGATCTTTTCTTTTGAAAAACTGATTAATCGGACAAAAATAAAGATAGAGTCCCATTCTACATGTCAATATCAATACCGGCAACAATGAAATTTAAAGTAAGAGGAAAATCCGTCGACTTTAAAAATCGTGAGGGTTCAAGTCCTTCTTTTCCCCA
>YR15
CCCTGACTAGCTGCTATTGAGCCCCATCTACAAATGGATAATTCTGTCTTAGTGGAGACGAGTTTTTGAAAATAACGGAGAAATACCGACTCTCTTGCAAGAGAGTCGGTATTTCTCCGTTATTTTTTATGTTTTTCTTTAGTAGTTTTTTATTTCTATCTTTTTTTTACGAAAAGTATTTTTATGCTTTTGCTTTGGATTGTCTGATATTTTTGTTATGGTTATGGGCTCATATTCGTTATGTACCAGTATAATAATATTAGTTATTTGTTAATCCCACTAATAAAGTTCTAATTTTATTAATTCGATTCTAATTTTCGAATTTTTTAGTTTTTTTAATATAAAATAAAAGAAAAGAGAAAGTTGTAATTTTATGCCTCTTAAATCTTCATTTCTATTTTAAATGGGAGAAATTGAAACCTTTTTATTAAAAATTTTATTAAATACAAATAAAAAAAATTTTAAATCTTGGAGGAAGGGGGGGCGGATGTAGCCAAGTGGATCAAGGCAGTGGATTGTGAATCCCCCAAACGCGAGGACCCCGCTGGCTGACTGGTATGGAACCTACTAAGTGATAACTTTCAAATTCAGAAGAAACCCTGGAATCAAAAATGGGCAATCCTGAGCCAAATCCTGTTTTACAAGAACAAACAAGGGTTCAGAAAGCGAAAAAAAAAAAGGGGGATAGGTGCAGAGACTCAACGGAAGCTGTTCTAAAAAATGGGGTTGACTGCCTTTTTTGGTAAAGAAAGGAAAAGAAATCCTTCTATCGAATATCGAAACTCCATAAAGGATGAAGGATAAGCGTATATACACTATGTATACACAATGAAAAACTATCTCAAAAATGACAACCGAATCCGTATTTTTTTTTATGAAAAAAAAAAAAATTGTTATGAATCAATTCCAAGTTGAAAAAAGAATCGAATATTCATTGATCAAATCATTCACTCCATAGTCTGATCGATCTTTTCTTTTGAAAAACTGATTAATCGGACAAGAATAAAGATAGAGTCCCATTCTACATGTCAATATCAATACCGGCAACAATGAAATTTAAAGTAAGAGGAAAATCCGTCGACTTTAAAAATCGTGAGGGTTCAAGTCCTTTTTATCCCAAA
>YR16
TCTTGACTAGCTGCTATTGAGCCCCATCTACAAATGGATAATTCTGTCTTAGTGGAGACGAGTTTTTGAAAATAACGGAGAAATACCGACTCTCTTGCAAGAGAGTCGGTATTTCTCCGTTATTTTTTATGTTTTTCTTTAGTAGTTTTTTATTTCTATCTTTTTTTTACGAAAAGTATTTTTATGCTTTTGCTTTGATTTTGTCTGATATTTTTGTTATGGTTATGGGCTCATATTCGTTATGTACCAGTATAATAATATTAGTTATTTGTTAATCCCACTAATAAAGTTCTAATTTTATTAATTCGATTCTAATTTTCGAATTTTTTAGTTTTTTTAATATAAAATAAAAGAAAAGAGAAAGTTGTAATTTTATGCCTCTTAAATCTTCATTTCTATTTTAAATGGTAGAAATTGAAACCTTTTTATTAAATATTTTATTAAATACAAATAAAAAAAATTTTAAATCGTGGAGGAAGGGGGGGCGGATGTAGCCAAGTGGATCAAGGCAGTGGATTGTGAATCCACCAAGACACGAGGAACATGCATGACTTGGTTGGAACCTACTAAGTGATAACTTTCAAATTCAGAGAAACCCTGGAATCAAAAATGGGCAATCCTGAGCCAAATCCTGTTTTACAAGAACAAACAAGGGTTCAGAAAGCGAAAAAAAAAAAGGGGGATAGGTGCAGAGACTCAACGGAAGCTGTTCTAAAAAATGGGGTTGACTGCCTTTTTTGGTAAAGAAAGGAAAAGAAATCCTTCTATCGAATATCGAAACTCCATAAAGGATGAAGGATAAGCGTATATACACTATGTATACACAATGAAAAACTATCTCAAAAATGACAACCGAATCCGTATTTTTTTTTATGAAAAAAAAAAGAATTGTTATGAATCAATTCCAAGTTGAAAAAAGAATCGAATATTCATTGATCAAATCATTCACTCCATAGTCTGATCGATCTTTTCTTTTGAAAAACTGATTAATCGGACAAGAATAAAGATAGAGTCCCATTCTACATGTCAATATCAATACCGGCAACAATGAAATTTAAAGTAAGAGGAAAATCCGTCGACTTTAAAAATCGTGAGGGTTCAAGTCCCTTCTATCCCCAA
>YR17
ATCACTGACTAGCTGCTATTGAGCCCCATCTACAAATGGATAATTCTGTCTTAGTGGAGACGAGTTTTTGAAAATAACGGAGAAATACCGACTCTCTTGCAAGAGAGTCGGTATTTCTCCGTTATTTTTTATGTTTTTCTTTAGTAGTTTTTTATTTCTATCTTTTTTTTACGAAAAGTATTTTTATGCTTTTGCTTTGATTTTGTCTGATATTTTTGTTATGGTTATGGGCTCATATTCGTTATGTACCAGTATAATAATATTAGTTATTTGTTAATCCCACTAATAAAGTTCTAATTTTATTAATTCGATTCTAATTTTCGAATTTTTTAGTTTTTTTAATATAAAATAAAAGAAAAGAGAAAGTTGTAATTTTATGCCTCTTAAAACTTCATTTCTATTTTAAATGGTAGAAATTGAAACCTTTTTATTAAATATTTTATTAAATACAAATAAAAAAAATTTTAAATCTTGGAGGAAGGGGGGGCGGATGTAGCCAAGTGGATCAAGGCAGTGGATTGTGAATCCACCATGACCGAGGGAGTATGCTGACTGGTTGGACCTACTAAGTGATAACTTTCAAATTCAGAAGAAACCCTGGAATCAAAAATGGGCAATCCTGAGCCAAATCCTAGTTTTACAAGAACAAACAAGGGTTCAGAAAGCGAAAAAAAAAAAGGGGGATAGGTGCAGAGACTCAACGGAAGCTGTTCTAAGAAATGGGGTTGACTGCCTTTTTTGGTAAAGAAAGGAAAAGAAATCCTTCTATCGAATATCGAAACTCCATAAAGGATGAAGGATAAGCGTATATACACTATGTATACACAATGAAAAACTATCTCAAAAATGACAACCGAATCCGTATTTTTTTTTATGAAAAAAAAAAAAATTGTTATGAATCAATTCCAAGTTGAAAAAAGAATCGAATATTCATTGATCAAATCATTCACTCCATAGTCTGATCGATCTTTTCTTTTGAAAAACTGATTAATCGGACAAGAATAAAGATAGAGTCCCATTCTACATGTCAATATCAATACCGGCAACAATGAAATTTAAAGTAAGAGGAAAATCCGTCGACTTTAAAAATCGTGAGGGTTCAAGTCTTTTTTTACCCCCAA
>YR18
AACTGACTAGCTGCTATTGAGCCCCATCTACAAATGGATAATTCTGTCTTAGTGGAGACGAGTTTTTGAAAATAACGGAGAAATACCGACTCTCTTGCAAGAGAGTCGGTATTTCTCCGTTATTTTTTATGTTTTTCTTTAGTAGTTTTTTATTTCTATCTTTTTTTTACGAAAAGTATTTTTATGCTTTTGCTTTGATTTTGTCTGATATTTTTGTTATGGTTATGGGCTCATATTCGTTATGTACCAGTATAATAATATTAGTTATTTGTTAATCCCACTAATAAAGTTCTAATTTTATTAATTCGATTCTAATTTTCGAATTTTTTAGTTTTTTTAATATAAAATAAAAGAAAAGAGAAAGTTGTAATTTTATGCCTCTTAAATCTTCATTTCTATTTTAAATGGTAGAAATTGAAACCTTTTTATTAAATATTTTATTAAATACAAATAAAAAAAATTTTAAATCGTGGAGGAAGGGGGGGCGGATGTAGCCAAGTGGATCAAGGCAGTGGATTGTGTATCCACCATGAGCGAGAACCCCGTATTGTTTGAGCCTTGGTATGGAACCTACTAAGTGATAACTTTCAAATTCAGAGAAACCCTGGAATCAAAAATGGGCAATCCTGAGCCAAATCCTGTTTTACAAGAACAAACAAGGGTTCAGAAAGCGAAAAAAAAAAAGGGGGATAGGTGCAGAGACTCAACGGAAGCTGTTCTAAAAAATGGGGTTGACTGCCTTTTTTGGTAAAGAAAGGAAAAGAAATCCTTCTATCGAATATCGAAACTCCATAAAGGATGAAGGATAAGCGTATATACACTATGTATACACAATGAAAAACTATCTCAAAAATGACAACCGAATCCGTATTTTTTTTTATGAAAAAAAAAAAAATTGTTATGAATCAATTCCAAGTTGAAAAAAGAATCGAATATTCATTGATCAAATCATTCACTCCATAGTCTGATCGATCTTTTCTTTTGAAAAACTGATTAATCGGACAAGAATAAAGATAGAGTCCCATTCTACATGTCAATATCAATACCGGCAACAATGAAATTTAAAGTAAGAGGAAAATCCGTCGACTTTAAAAATCGTGAGGGTTCAGGTCCTTCTTATCCCCAA
>YR19
AATCTTAGACTAGCTGCTATTGAGCCCCATCTACAAATGGATAATTCTGTCTTAGTGGAGACGAGTTTTTGAAAATAACGGAGAAATACCGACTCTCTTGCAAGAGAGTCGGTATTTCTCCGTTATTTTTTATGTTTTTCTTTAGTAGTTTTTTATTTCTATCTTTTTTTTACGAAAAGTATTTTTATGCTTTTGCTTTGATTTTGTCTGATATTTTTGTTATGGTTATGGGCTCATATTCGTTATGTACCAGTATAATAATATTAGTTATTTGTTAATCCCACTAATAAAGTTCTAATTTTATTAATTCGATTCTAATTTTCGAATTTTTTAGTTTTTTTAATATAAAATAAAAGAAAAGAGAAAGTTGTAATTTTATGCCTCTTAAATCTTCATTTCTATTTTAAATGGTAGAAATTGAAACCTTTTTATTAAATATTTTATTAAATACAAATAAAAAAAATTTTAAATCTTGGAGGAAGGGGGGGCGGATGTAGCCAAGTGGATCAAGGCAGTGGATTGTGAATCCACCATGCGCGAGAGAGATCTTTTCCCGTTTTAAGCCCATTTTTTTGAAACCCAGATTGTCAAAATGCCAACCAGGGTTGATGCTGACTGGTTGGAACCTACTAAGTGAAACTTTCAATTCAGAGAAACCCTGGAATCAAAAATGGGCAATCCTGAGCCAAATCCTGTTTTACAAGAACAAACAAGGGTTCAGAAAGCGAAAAAAAAAAAGGGGGATAGGTGCAGAGACTCAACGGAAGCTGTTCTAAAAAATGGGGTTGACTGCCTTTTTTGGTAAAGAAAGGAAAAGAAATCCTTCTATCGAATATCGAAACTCCATAAAGGATGAAGGATAAGCGTATATACACTATGTATACACAATGAAAAACTATCTCAAAAATGACAACCGAATCCGTATTTTTTTTTATGAAAAAAAAAAAAATTGTTATGAATCAATTCCAAGTTGAAAAAAGAATCGAATATTCATTGATCAAATCATTCACTCCATAGTCTGATCGATCTTTTCTTTTGAAAAACTGATTAATCGGACAAAAATAAAGATAGAGTCCCATTCTACATGTCAATATCAATACCGGCAACAATGAAATTTAAAGTAAAAGGAAAATCCGTCGACTTTAAAAATCGTGAGGGTTCAAGTCCTCCTATTCCCCCAA
>YR20
TCACTGACTAGCTGCTATTGAGCCCCATCTACAAATGGATAATTCTGTCTTAGTGGAGACGAGTTTTTGAAAATAACGGAGAAATACCGACTCTCTTGCAAGAGAGTCGGTATTTCTCCGTTATTTTTTATGTTTTTCTTTAGTAGTTTTTTATTTCTATCTTTTTTTTACGGGCAGTATTTTTATGCTTTTGCTTTGGTTTGTCTGATATTTTTGTTATGGTTATGGGCTCATATTCGTTATGTACCAGTATAATAATATTAGTTATTTGTTAATCCCACTAATAAAGTTCTAATTTTATTAATTCGATTCTAATTTTCGAATTTTTTAGTTTTTTTAATATAAAATAAAAGAAAAGAGAAAGTTGTAATTTTATGCCTCTTAAATCTTCATTTCTATTTTAAATGGTAGAAATTGAAACCTTTTTATTAAATATTTTATTAAATACAAATAAAAAAAATTTTAAATCGTGGAGGAAGGGGGGGCGGATGTAGCCAAGTGGATCAAGGCAGTGGATTGTGAATCCACCATGCACGACGAGCACAATGGATGAGCTGGTATGGAACCTACTAAGTGATAACTTTCAAATTCAGAGAAACCCTGGAATCAAAAATGGGCAATCCTGAGCCAAATCCTGTTTTACAAGAACAAACAAGGGTTCAGAAAGCGAAAAAAAAAAAGGGGGATAGGTGCAGAGACTCAACGGAAGCTGTTCTAAGAAATGGGGTTGACTGCCTTTTTTGGTAAAGAAAGGAAAAGAAATCCTTCTATCGAATATCGAAACTCCATAAAGGATGAAGGATAAGCGTATATACACTATGTATACACAATGAAAAACTATCTCAAAAATGACAACCGAATCCGTATTTTTTTTTATGAAAAAGAAAAGAATTGTTATGAATCAATTCCAAGTTGAAAAAAGAATCGAATATTCATTGATCAAATCATTCACTCCATAGTCTGATCGATCTTTTCTTTTGAAAAACTGATTAATCGGACAAGAATAAAGATAGAGTCCCATTCTACATGTCAATATCAATACCGGCAACAATGAAATTTAAAGTAAGAGGAAAATCCGTCGACTTTAAAAATCGTGAGGGTTCAAGTCCCTCCTATCCCC
>YR21
TCTCTGACTAGCTGCTATTGAGCCCCATCTACAAATGGATAATTCTGTCTTAGTGGAGACGAGTTTTTGAAAATAACGGAGAAATACCGACTCTCTTGCAAGAGAGTCGGTATTTCTCAGTTATTTTTTATGTTTTTCTTTAGTAGTTTTTTATTTCTATCTTTTTTTTACGAAAAGTATTTTTATGCTTTTGCTTTGATTTTGTCTGATATTTTTGTTATGGTTATGGGCTCATATTCGTTATGTACCAGTATAATAATATTAGTTATTTGTTAATCCCACTAATAAAGTTCTAATTTTATTAATTCGATTCTAATTTTCGAATTTTTTAGTTTTTTTAATATAAAATAAAAGAAAAGAGAAAGTTGTAATTTTATGCCTCTTAAATCTTCATTTCTATTTTAAATGGTAGAAATTGAAACCTTTTTATTAAATATTTTATTAAATACAAATAAAAAAAATTTTAAATCTTGGAGGAAGGGGGGGCGGATGTAGCCAAGTGGATCAAGGCAGTGGATTGTGAATCCACCATGAGCGAAGATTTTTGCTTGACTTGGTATGGACCTACTAAGTGATAACTTTCAAATTCAGAGAAACCCTGGAATCAAAAATGGGCAATCCTGAGCCAAATCCTGTTTTACAAGAACAAACAAGGGTTCAGAAAGCGAAAAAAAAAAAGGGGGATAGGTGCAGAGACTCAACGGAAGCTGTTCTAAAAAATGGGGTTGACTGCCTTTTTTGGTAAAGAAAGGAAAAGAAATCCTTCTATCGAATATCGAAACTCCATAAAGGATGAAGGATAAGCGTATATACACTATGTATACACAATGAAAAACTATCTCAAAAATGACAACCGAATCCGTATTTTTTTTTATGAAAAAAAAAAAAATTGTTATGAATCAATTCCAAGTTGAAAAAAGAATCGAATATTCATTGATCAAATCATTCACTCCATAGTCTGATCGATCTTTTCTTTTGAAAAACTGATTAATCGGACAAAAATAAAGATAGAGTCCCATTCTACATGTCAATATCAATACCGGCAACAATGAAATTTAAAGTAAGAGGAAAATCCGTCGACTTTAAAAATCGTGAGGGTTCAAGTCCCTCTTATCCCCA
>YR22
ATCTCTGACTAGCTGCTATTGAGCCCCATCTACAAATGGATAATTCTGTCTTAGTGGAGACGAGTTTTTGAAAATAACGGAGAAATACCGACTCTCTTGCAGAGAGTCGGTATTTCTCCGTTATTTTTTATGTTTTTCTTTAGTAGTTTTTTATTTCTATCTTTTTTTTACGAAAAGTATTTTTATGCTTTTGCTTTGATTTTGTCTGATATTTTTGTTATGGTTATGGGCTCATATTCGTTATGTACCAGTATAATAATATTAGTTATTTGTTAATCCCACTAATAAAGTTCTAATTTTATTAATTCGATTCTAATTTTCGAATTTTTTAGTTTTTTTAATATAAAATAAAAGAAAAGAGAAAGTTGTAATTTTATGCCTCTTAAATCTTCATTTCTATTTTAAATGGTAGAAATTGAAACCTTTTTATTAAATATTTTATTAAATAGAAATAAAAAAAATTTTAAATCTTGGAGGAAGGGGGGGCGGATGTAGCCAAGTGGATCAAGGCAGTGGATTGTGAATCCACCATGACGCGAACAACAGCATGGCTGAGCTGGTATGGACCTACTTAAGTGATAACTTTCAAATTCAGAAGAAACCCTGGAATCAAAAATGGGCAATCCTGAGCCAAATCCTGTTTTACAAGAACAAACAAGGGTTCAGAAAGCGAAAAAAAAAAAGGGGGATAGGTGCAGAGACTCAACGGAAGCTGTTCTAAGAAATGGGGTTGACTGCCTTTTTTGGTAAAGAAAGGAAAAGAAATCCTTCTATCGAATATCGAAACTCCATAAAGGATGAAGGATAAGCGTATATACACTATGTATACACAATGAAAAACTATCTCAAAAATGACAACCGAATCCGTATTTTTTTTTATGAAAAAAAAAAAAATTGTTATGAATCAATTCCAAGTTGAAAAAAGAATCGAATATTCATTGATCAAATCATTCACTCCATAGTCTGATCGATCTTTTCTTTTGAAAAACTGATTAATCGGACAAGAATAAAGATAGAGTCCCATTCTACATGTCAATATCAATACCGGCAACAATGAAATTTAAAGTAAAAGGAAAATCCGTCGACTTTAAAAATCGTGAGGGTTCAAGTCCTTTTTTTCCCCAA
>YR23
ATCTCTGACTAGCTGCTATTGAGCCCCATCTACAAATGGATAATTCTGTCTTAGTGGAGACGAGTTTTTGAAAATAACGGAGAAATACCGACTCTCTTGCAAGAGAGTCGGTATTTCTCCGTTATTTTTTATGTTTTTCCTTAGTAGTTTTTTATTTCTATCTTTTTTTTACGAAAAGTATTTTTATGCTTTTGCTTTGGTTTGTCTGATATTTTTGTTATGGTTATGGGCTCATATTCGTTATGTACCAGTATAATAATATTAGTTATTTGTTAATCCCACTAATAAAGTTCTAATTTTATTAATTCGATTCTAATTTTCGAATTTTTTAGTTTTTTTAATATAAAATAAAAGAAAAGAGAAAGTTGTAATTTTATGCCTCTTAAATCTTCATTTCTATTTTAAATGGTAGAAATTGAAACCTTTTTATTAAATATTTTATTAAATAGAAATAAAAAAAATTTTAAATCGTGGAGGAAGGGGGGGCGGATGTAGCCAAGTGGATCAAGGCAGTGGATTGTGAATCCACCATGAGCGAGGTAACCATGACTGGTTGGACCTACTAAGTGATAACTTTCAAATTCAGAGAAACCCTGGAATCAAAAATGGGCAATCCTGAGCCAAATCCTGTTTTACAAGAACAAACAAGGGTTCAGAAAGCGAAAAAAAAAAAGGGGGATAGGTGCAGAGACTCAACGGAAGCTGTTCTAAAAAATGGGGTTGACTGCCTTTTTTGGTAAAGAAAGGAAAAGAAATCCTTCTATCGAATATCGAAACTCCATAAAGGATGAAGGATAAGCGTATATACACTATGTATACACAATGAAAAACTATCTCAAAAATGACAACCGAATCCGTATTTTTTTTTATGAAAAAAAAAAAAATTGTTATGAATCAATTCCAAGTTGAAAAAAGAATCGAATATTCATTGATCAAATCATTCACTCCATAGTCTGATCGATCTTTTCTTTTGAAAAACTGATTAATCGGACAAGAATAAAGATAGAGTCCCATTCTACATGTCAATATCAATACCGGCAACAATGAAATTTAAAGTAAGAGGAAAATCCGTCGACTTTAAAAATCGTGAGGGTTCAAGTCTCTTTTATCCCCCAA
>YR24
AACAGACTAGCTGCTATTGAGCCCCATCTACAAATGGATAATTCTGTCTTAGTGGAGACGAGTTTTTGAAAATAACGGAGAAATACCGACTCTCTTGCAAGAGAGTCGGTATTTCTCAGTTATTTTTTATGTTTTTCTTTAGTAGTTTTTTATTTCTATCTTTTTTTTACGAAAAGTATTTTTATGCTTTTGCTTTTATTTTGTCTGATATTTTTGTTATGGTTATGGGCTCATATTCGTTATGTACCAGTATAATAATATTAGTTATTTGTTAATCCCACTAATAAAGTTCTAATTTTATTAATTCGATTCTAATTTTCGAATTTTTTAGTTTTTTTAATATAAAATAAAAGAAAAGAGAAAGTTGTAATTTTATGCCTCTTAAATCTTCATTTCTATTTTAAATGGGAGAAATTGAAACCTTTTTATTAAATATTTTATTAAATAGAAATAAAAAAAATTTTAAATCTTGGAGGAAGGGGGGGCGGATGTAGCCAAGTGGATCAAGGCGGTGGATTGTGAATCCACCATGAGCGAGAAGGATGCATGAGCTGGTTGGAACCTACTAAGTGATAACTTTCAAATTCAGAGAAACCCTGGAATCAAAAATGGGCAATCCTGAGCCAAATCCTGTTTTACAAGAACAAACAAGGGTTCAGAAAGCGAAAAAAAAAAAGGGGGATAGGTGCAGAGACTCAACGGAAGCTGTTCTAAGAAATGGGGTTGACTGCCTTTTTTGGTAAAGAAAGGAAAAGAAATCCTTCTATCGAATATCGAAACTCCATAAAGGATGAAGGATAAGCGTATATACACTATGTATACACAATGAAAAACTATCTCAAAAATGACAACCGAATCCGTATTTTTTTTTATGAAAAAAAAAAAAATTGTTATGAATCAATTCCAAGTTGAAAAAAGAATCGAATATTCATTGATCAAATCATTCACTCCATAGTCTGATCGATCTTTTCTTTTGAAAAACTGATTAATCGGACAAAAATAAAGATAGAGTCCCATTCTACATGTCAATATCAATACCGGCAACAATGAAATTTAAAGTAAAAGGAAAATCCGTCGACTTTAAAAATCGTGAGGGTTCAAGTCTCTCTTATTCCCCAA
>YR25
AGTCTGACTAGCTGCTATTGAGCCCCATCTACAAATGGATAATTCTGTCTTAGTGGAGACGAGTTTTTGAAAATAACGGAGAAATACCGACTCTCTTGCAAGAGAGTCGGTATTTCTCAGTTATTTTTTATGTTTTTCTTTAGTAGTTTTTTATTTCTATCTTTTTTTTACGAAAAGTATTTTTATGCTTTTGCTTTGATTTTGTCTGATATTTTTGTTATGGTTATGGGCTCATATTCGTTATGTACCAGTATAATAATATTAGTTATTTGTTAATCCCACTAATAAAGTTCTAATTTTATTAATTCGATTCTAATTTTCGAATTTTTTAGTTTTTTTAATATAAAATAAAAGAAAAGAGAAAGTTGTAATTTTATGCCTCTTAAATCTTCATTTCTATTTTAAATGGTAGAAATTGAAACCTTTTTATTAAATATTTTATTAAATAGAAATAAAAAAAATTTTAAATCGTGGAGGAAGGGGGGGCGGATGTAGCCAAGTGGATCAAGGCAGTGGATTGTGAATCCACCATGAAGCGAGGACTCATGGCAGAGCTGGTTGGACCTACTAAGTGATAACTTTCAAATTCAGAGAAACCCTGGAATCAAAAATGGGCAATCCTGAGCCAAATCCTGTTTTACAAGAACAAACAAGGGTTCAGAAAGCGAAAAAAAAAAAGGGGGATAGGTGCAGAGACTCAACGGAAGCTGTTCTAAAAAATGGGGTTGACTGCCTTTTTTGGTAAAGAAAGGAAAAGAAATCCTTCTATCGAATATCGAAACTCCATAAAGGATGAAGGATAAGCGTATATACACTATGTATACACAATGAAAAACTATCTCAAAAATGACAACCGAATCCGTATTTTTTTTTATGAAAAAAAAAAAAATTGTTATGAATCAATTCCAAGTTGAAAAAAGAATCGAATATTCATTGATCAAATCATTCACTCCATAGTCTGATCGATCTTTTCTTTTGAAAAACTGATTAATCGGACAAAAATAAAGATAGAGTCCCATTCTACATGTCAATATCAATACCGGCAACAATGAAATTTAAAGTAAGAGGAAAATCCGTCGACTTTAAAAATCGTGAGGGTTCAAGTCTTTTTTTACCCCAAA
>YR26
CGTCAGACTAGCTGCTATTGAGCCCCATCTACAAATGGATAATTCTGTCTTAGTGGAGACGAGTTTTTGAAAATAACGGAGAAATACCGACTCTCTTGCAAGAGAGTCGGTATTTCTCCGTTATTTTTTATGTTTTTCTTTAGTAGTTTTTTATTTCTATCTTTTTTTTACGAAAAGTATTTTTATGCTTTTGCTTTGATTTTGTCTGATATTTTTGTTATGGTTATGGGCTCATATTCGTTATGTACCAGTATAATAATATTAGTTATTTGTTAATCCCACTAATAAAGTTCTAATTTTATTAATTCGATTCTAATTTTCGAATTTTTTAGTTTTTTTAATATAAAATAAAAGAAAAGAGAAAGTTGTAATTTTATGCCTCTTAAATCTTCATTTCTATTTTAAATGGTAGAAATTGAAACCTTTTTATTAAATATTTTATTAAATAGAAATAAAAAAAATTTTAAATCGTGGAGGAAGGGGGGGCGGATGTAGCCAAGTGGATCAAGGCAGTGGATTGTGTATCCACCAAAAAACGAACCATGCCTTGAGCCTGGTATGGAACCTACTAAGTGATAACTTTCAAATTCAGAAGAAACCCTGGAATCAAAAATGGGCAATCCTGAGCCAAATCCTGTTTTACAAGAACAAACAAGGGTTCAGAAAGCGAAAAAAAAAAAGGGGGATAGGTGCAGAGACTCAACGGAAGCTGTTCTAAGAAATGGGGTTGACTGCCTTTTTTGGTAAAGAAAGGAAAAGAAATCCTTCTATCGAATATCGAAACTCCATAAAGGATGAAGGATAAGCGTATATACACTATGTATACACAATGAAAAACTATCTCAAAAATGACAACCGAATCCGTATTTTTTTTTATGAAAAAAAAAAAAATTGTTATGAATCAATTCCAAGTTGAAAAAAGAATCGAATATTCATTGATCAAATCATTCACTCCATAGTCTGATCGATCTTTTCTTTTGAAAAACTGATTAATCGGACAAGAATAAAGATAGAGTCCCATTCTACATGTCAATATCAATACCGGCAACAATGAAATTTAAAGTAAGAGGAAAATCCGTCGACTTTAAAAATCGTGAGGGTTCAAGTCCTCTTTATTCCCCAA
>YR27
CTCAGACTAGCTGCTATTGAGCCCCATCTACAAATGGATAATTCTGTCTTAGTGGAGACGAGTTTTTGAAAATAACGGAGAAATACCGACTCTCTTGCAAGAGAGTCGGTATTTCTCCGTTATTTTTTATGTTTTTCTTTAGTAGTTTTTTATTTCTATCTTTTTTTTACGAAAAGTATTTTTATGCTTTTGCTTTGATTTTGTCTGATATTTTTGTTATGGTTATGGGCTCATATTCGTTATGTACCAGTATAATAATATTAGTTATTTGTTAATCCCACTAATAAAGTTCTAATTTTATTAATTCGATTCTAATTTTCGAATTTTTTAGTTTTTTTAATATAAAATAAAAGAAAAGAGAAAGTTGTAATTTTATGCCTCTTAAATCTTCATTTCTATTTTAAATGGTAGAAATTGAAACCTTTTTATTAAATATTTTATTAAATAGAAATAAAAAAAATTTTAAATCGTGGAGGAAGGGGGGGCGGATGTAGCCAAGTGGATCAAGGCAGTGGATTGTGTATCCACCATGAGCGACGAGTGATTGCATGAGCTTGGTATGGAACCTACTAAGTGATAACTTTCAAATTCAGAGAAACCCTGGAATCAAAAATGGGCAATCCTGAGCCAAATCCTGTTTTACAAGAACAAACAAGGGTTCAGAAAGCGAAAAAAAAAAAGGGGGATAGGTGCAGAGACTCAACGGAAGCTGTTCTAAGAAATGGGGTTGACTGCCTTTTTTGGTAAAGAAAGGAAAAGAAATCCTTCTATCGAATATCGAAACTCCATAAAGGATGAAGGATAAGCGTATATACACTATGTATACACAATGAAAAACTATCTCAAAAATGACAACCGAATCCGTATTTTTTTTTATGAAAAAAAAAAAAATTGTTATGAATCAATTCCAAGTTGAAAAAAGAATCGAATATTCATTGATCAAATCATTCACTCCATAGTCTGATCGATCTTTTCTTTTGAAAAACTGATTAATCGGACAAGAATAAAGATAGAGTCCCATTCTACATGTCAATATCAATACCGGCAACAATGAAATTTAAAGTAAGAGGAAAATCCGTCGACTTTAAAAATCGTGAGGGTTCAAGTCCTTCTTTATCCCCAA
>BS01
TCACTGACTAGCTGCTATTGAGCCCCATCTACAAATGGATAATTCTGTCTTAGTGGAGACGAGTTTTTGAAAATAACGGAGAAATACCGACTCTCTTGCAAGAGAGTCGGTATTTCTCCGTTATTTTTTATGTTTTTCTTTAGTAGTTTTTTATTTCTATCTTTTTTTTACGAAAAGTATTTTTATGCTTTTGCTTTGATTTTGTCTGATATTTTTGTTATGGTTATGGGCTCATATTCGTTATGTACCAGTATAATAATATTAGTTATTTGTTAATCCCACTAATAAAGTTCTAATTTTATTAATTCGATTCTAATTTTCGAATTTTTTAGTTTTTTTAATATAAAATAAAAGAAAAGAGAAAGTTGTAATTTTATGCCTCTTAAATCTTCATTTCTATTTTAAATGGTAGAAATTGAAACCTTTTTATTAAATATTTTATTAAATAGAAATAAAAAAAATTTTAAATCGTGGAGGAAGGGGGGGCGGATGTAGCCAAGTGGATCAAGGCAGTGGATTGTGAATCCACCATCAACGAGGACCTCTGGGATGCTGAGCTGGTATGGAACCTACTAAGTGATAACTTTCAAATTCAGAGAAACCCTGGAATCAAAAATGGGCAATCCTGAGCCAAATCCTGTTTTACAAGAACAAACAAGGGTTCAGAAAGCGAAAAAAAAAAAGGGGGATAGGTGCAAAGACTCAACGGAAGCTGTTCTAAAAAATGGGGTTGACTGCCTTTTTTGGTAAAGAAAGGAAAAGAAATCCTTCTATCGAATATCGAAACTCCATAAAGGATGAAGGATAAGCGTATATACACTATGTATACACAATGAAAAACTATCTCAAAAATGACAACCGAATCCGTATTTTTTTTTATGAAAAAAAAAAAAATTGTTATGAATCAATTCCAAGTTGAAAAAAGAATCGAATATTCATTGATCAAATCATTCACTCCATAGTCTGATCGATCTTTTCTTTTGAAAAACTGATTAATCGGACAAAAATAAAGATAGAGTCCCATTCTACATGTCAATATCAATACCGGCAACAATGAAATTTAAAGTAAGAGGAAAATCCGTCGACTTTAAAAATCGTGAGGGTTCAAGTCCCTCCTTTTCCCCAA
>BS02
ACCTGACTAGCTGCTATTGAGCCCCATCTACAAATGGATAATTCTGTCTTAGTGGAGACGAGTTTTTGAAAATAACGGAGAAATACCGACTCTCTTGCAAGAGAGTCGGTATTTCTCCGTTATTTTTTATGTTTTTCTTTAGTAGTTTTTTATTTCTATCTTTTTTTTACGAAAAGTATTTTTATGCTTTTGCTTTTATTTTGTCTGATATTTTTGTTATGGTTATGGGCTCATATTCGTTATGTACCAGTATAATAATATTAGTTATTTGTTAATCCCACTAATAAAGTTCTAATTTTATTAATTCGATTCTAATTTTCGAATTTTTTAGTTTTTTTAATATAAAATAAAAGAAAAGAGAAAGTTGTAATTTTATGCCTCTTAAATCTTCATTTCTATTTTAAATGGTAGAAATTGAAACCTTTTTATTAAATATTTTATTAAATAGAAATAAAAAAAATTTTAAATCTTGGAGGAAGGGGGGGCGGATGTAGCCCAGTGGATCAAGGCAGTGGATTGTGAATCCCCCATGACCGAGGAGCCCTTGAATGCTGAGCTTGGATGGAACCTACTAAGTGATAACTTTCAAATTCAGAGAAACCCTGGAATCAAAAATGGGCAATCCTGAGCCAAATCCTGTTTTACAAGAACAAACAAGGGTTCAGAAAGCGAAAAAAAAAAAGGGGGATAGGTGCAAAGACTCAACGGAAGCTGTTCTAAAAAATGGGGTTGACTGCCTTTTTTGGTAAAGAAAGGAAAAAAAATCCTTCTATCGAATATCGAAACTCCATAAAGGATGAAGGATAAGCGTATATACACTATGTATACACAATGAAAAACTATCTCAAAAATGACAACCGAATCCGTATTTTTTTTTATGAAAAAAAAAAAAATTGTTATGAATCAATTCCAAGTTGAAAAAAGAATCGAATATTCATTGATCAAATCATTCACTCCATAGTCTGATCGATCTTTTCTTTTGAAAAACTGATTAATCGGACAAAAATAAAGATAGAGTCCCATTCTACATGTCAATATCAATACCGGCAACAATGAAATTTAAAGTAAGAGGAAAATCCGTCGACTTTAAAAATCGGGAGGGTTCAAGTCCCTTTTTTTCCCCAA
>BS03
ATCTCTGACTAGCTGCTATTGAGCCCCATCTACAAATGGATAATTCTGTCTTAGTGGAGACGAGTTTTTGAAAATAACGGAGAAATACCGACTCTCTTGCAAGAGAGTCGGTATTTCTCCGTTATTTTTTATGTTTTTCTTTAATAGTTTTTTATTTCTATCTTTTTTTTACGAAAAGTATTTTTATGCTTTTGCTTTGATTTTGTCTGATATTTTTGTTATGGTTATGGGCTCATATTCGTTATGTACCAGTATAATAATATTAGTTATTTGTTAATCCCACTAATAAAGTTCTAATTTTATTAATTCGATTCTAATTTTCGAATTTTTTAGTTTTTTTAATATAAAATAAAAGAAAAGAGAAAGTTGTAATTTTATGCCTCTTAGATCTTCATTTCTATTTTAAATGGTAGAAATTGAAACCTTTTTATTAAATATTTTATTAAATAGAAATAAAAAAAATTTTAAATCTTGGAGGAAGGGGGGGCGGATGTAGCCAAGTGGATCAAGGCGGTGGATTGTGAATCCCCCATGACGCGAGAAATCATGCATGAGCTTGGTATGGAACCTACTAAGTGATAACTTTCAAATTCAGAGAAACCCTGGAATCAAAAATGGGCAATCCTGAGCCAAATCCTGTTTTACAAGAACAAACAAGGGTTCAGAAAGCGAAAAAAAAAAAGGGGGATAGGTGCAGAGACTCAACGGAAGCTGTTCTAAAAAATGGGGTTGACTGCCTTTTTTGGTAAAGAAAGGAAAAGAAATCCTTCTATCGAATATCGAAACTCCATAAAGGATGAAGGATAAGCGTATATACACTATGTATACACAATGAAAAACTATCTCAAAAATGACAACCGAATCCGTATTTTTTTTTATGAAAAAAAAAAAAATTGTTATGAATCAATTCCAAGTTGAAAAAAGAATCGAATATTCATTGATCAAATCATTCACTCCATAGTCTGATCGATCTTTTCTTTTGAAAAACTGATTAATCGGACAAAAATAAAGATAGAGTCCCATTCTACATGTCAATATCAATACCGGCAACAATGAAATTTAAAGTAAGAGGAAAATCCGTCGACTTTAAAAATCGTGAGGGTTCAAGTCCCTCTTTTCCCCCAA
>BS04
TACTGACTAGCTGCTATTGAGCCCCATCTACAAATGGATAATTCTGTCTTAGTGGAGACGAGTTTTTGAAAATAACGGAGAAATACCGACTCTCTTGCAAGAGAGTCGGTATTTCTCAGTTATTTTTTATGTTTTTCTTTAGTAGTTTTTTATTTCTATCTTTTTTTTACGAAAAGTATTTTTATGCTTTTGCTTTGATTTTGTCTGATATTTTTGTTATGGTTATGGGCTCATATTCGTTATGTACCAGTATAATAATATTAGTTATTTGTTAATCCCACTAATAAAGTTCTAATTTTATTAATTCGATTCTAATTTTCGAATTTTTTAGTTTTTTTAATATAAAATAAAAGAAAAGAGAAAGTTGTAATTTTATGCCTCTTAAATCTTCATTTCTATTTTAAATGGTAGAAATTGAAACCTTTTTATTAAATATTTTATTAAATAGAAATAAAAAAAATTTTAAATCGTGGAGGAAGGGGGGGCGGATGTAGCCAAGTGGATCAAGGCAGTGGATTGTGAATCCACCATGAGCGAAGATAATGGCATGAGCTTGGTATGGAACCTACTAAGTGATAACTTTCAAATTCAGAGAAACCCTGGAATCAAAAATGGGCAATCCTGAGCCAAATCCTGTTTTACAAGAACAAACAAGGGTTCAGAAAGCGAAAAAAAAAAAGGGGGATAGGTGCAGAGACTCAACGGAAGCTGTTCTAAGAAATGGGGTTGACTGCCTTTTTTGGTAAAGAAAGGAAAAGAAATCCTTCTATCGAATATCGAAACTCCATAAAGGATGAAGGATAAGCGTATATACACTATGTATACACAATGAAAAACTATCTCAAAAATGACAACCGAATCCGTATTTTTTTTTATGAAAAAAAAAAAAATTGTTATGAATCAATTCCAAGTTGAAAAAAGAATCGAATATTCATTGATCAAATCATTCACTCCATAGTCTGATCGATCTTTTCTTTTGAAAAACTGATTAATCGGACAAAAATAAAGATAGAGTCCCATTCTACATGTCAATATCAATACCGGCAACAATGAAATTTAAAGTAAAAGGAAAATCCGTCGACTTTAAAAATCGTGAGGGTTCAAGTCCTTTTTTTCCCCAAA
>BS05
ATCACTGACTAGCTGCTATTGAGCCCCATCTACAAATGGATAATTCTGTCTTAGTGGAGACGAGTTTTTGAAAATAACGGAGAAATACCGACTCTCTTGCAAGAGAGTCGGTATTTCTCCGTTATTTTTTATGTTTTTCTTTAGTAGTTTTTTATTTCTATCTTTTTTTTACGAAAAGTATTTTTATGCTTTTGCTTTGATTTTGTCTGATATTTTTGTTATGGTTATGGGCTCATATTCGTTATGTACCAGTATAATAATATTAGTTATTTGTTAATCCCACTAATAAAGTTCTAATTTTATTAATTCGATTCTAATTTTCGAATTTTTTAGTTTTTTTAATATAAAATAAAAGAAAAGAGAAAGTTGTAATTTTATGCCTCTTAAAACTTCATTTCTATTTTAAATGGTAGAAATTGAAACCTTTTTATTAAATATTTTATTAAATACAAATAAAAAAAATTTTAAATCTTGGAGGAAGGGGGGGCGGATGTAGCCAAGTGGATCAAGGCAGTGGATTGTGAATCCACCATGAGCGAAGACACATGGCATGAGCTGGTATGGAACCTACTAAGTGATAACTTTCAAATTCAGAGAAACCCTGGAATCAAAAATGGGCAATCCTGAGCCAAATCCTGTTTTACAAGAACAAACAAGGGTTCAGAAAGCGAAAAAAAAAAAGGGGGATAGGTGCAGAGACTCAACGGAAGCTGTTCTAAAAAATGGGGTTGACTGCCTTTTTTGGTAAAGAAAGGAAAAAAAATCCTTCTATCGAATATCGAAACTCCATAAAGGATGAAGGATAAGCGTATATACACTATGTATACACAATGAAAAACTATCTCAAAAATGACAACCGAATCCGTATTTTTTTTTATGAAAAAAAAAAAAATTGTTATGAATCAATTCCAAGTTGAAAAAAGAATCGAATATTCATTGATCAAATCATTCACTCCATAGTCTGATCGATCTTTTCTTTTGAAAAACTGATTAATCGGACAAAAATAAAGATAGAGTCCCATTCTACATGTCAATATCAATACCGGCAACAATGAAATTTAAAGTAAAAGGAAAATCCGTCAACTTTAAAAATCGTGAGGGTTCAAGTCCCTCTTATCCCCAAA
>BS06
CTCACTGACTAGCTGCTATTGAGCCCCATCTACAAATGGATAATTCTGTCTTAGTGGAGACGAGTTTTTGAAAATAACGGAGAAATACCGACTCTCTTGCAAGAGAGTCGGTATTTCTCCGTTATTTTTTATGTTTTTCCTTAGTAGTTTTTTATTTCTATCTTTTTTTTACGAAAAGTATTTTTATGCTTTTGCTTTGATTTTGTCTGATATTTTTGTTATGGTTATGGGCTCATATTCGTTATGTACCAGTATAATAATATTAGTTATTTGTTAATCCCACTAATAAAGTTCTAATTTTATTAATTCGATTCTAATTTTCGAATTTTTTAGTTTTTTTAATATAAAATAAAAGAAAAGAGAAAGTTGTAATTTTATGCCTCTTAAATCTTCATTTCTATTTTAAATGGTAGAAATTGAAACCTTTTTATTAAAAATTTTATTAAATAGAAATAAAAAAAATTTTAAATCTTGGAGGAAGGGGGGGCGGATGTAGCCCAGTGGATCAAGGCGGTGGATTGTGAATCCCCCATGACCGAGAACCTTTGGCATGAGCTTGGTATGGAACCTACTAAGTGATAACTTTCAAATTCAGAGAAACCCTGGAATCAAAAATGGGCAATCCTGAGCCAAATCCTGTTTTACAAGAACAAACAAGGGTTCAGAAAGCGAAAAAAAAAAAGGGGGATAGGTGCAAAGACTCAACGGAAGCTGTTCTAAAAAATGGGGTTGACTGCCTTTTTTGGTAAAAAAAGGAAAAAAAATCCTTCTATCGAATATCGAAACTCCATAAAGGATGAAGGATAAGCGTATATACACTATGTATACACAATGAAAAACTATCTCAAAAATGACAACCGAATCCGTATTTTTTTTTATGAAAAAAAAAAAAATTGTTATGAATCAATTCCAAGTTGAAAAAAGAATCGAATATTCATTGATCAAATCATTCACTCCATAGTCTGATCGATCTTTTCTTTTGAAAAACTGATTAATCGGACAAAAATAAAGATAGAGTCCCATTCTACATGTCAATATCAATACCGGCAACAATGAAATTTAAAGTAAGAGGAAAATCCGTCGACTTTAAAAATCGTGAGGGTTCAAGTCCCTCTTTACCCCCAA
>BS07
ATCTCAGACTAGCTGCTATTGAGCCCCATCTACAAATGGATAATTCTGTCTTAGTGGAGACGAGTTTTTGAAAATAACGGAGAAATACCGACTCTCTTGCAAGAGAGTCGGTATTTCTCCGTTATTTTTTATGTTTTTCTTTAGTAGTTTTTTATTTCTATCTTTTTTTTACGAAAAGTATTTTTATGCTTTTGCTTTGATTTTGTCTGATATTTTTGTTATGGTTATGGGCTCATATTCGTTATGTACCAGTATAATAATATTAGTTATTTGTTAATCCCACTAATAAAGTTCTAATTTTATTAATTCGATTCTAATTTTCGAATTTTTTAGTTTTTTTAATATAAAATAAAAGAAAAGAGAAAGTTGTAATTTTATGCCTCTTAAAACTTCATTTCTATTTTAAATGGGAGAAATTGAAACCTTTTTATTAAAAATTTTATTAAATACAAATAAAAAAAATTTTAAATCTTGGAGGAAGGGGGGGCGGATGTAGCCAAGTGGATCAAGGCAGTGGATTGTGAATCCCCCATGAACGAGATTTTGAATGAGCTTGGTATGGAACCTACTAAGTGATAACTTTCAAATTCAGAGAAACCCTGGAATCAAAAATGGGCAATCCTGAGCCAAATCCTGTTTTACAAGAACAAACAAGGGTTCAGAAAGCGAAAAAAAAAAAGGGGGATAGGTGCAGAGACTCAACGGAAGCTGTTCTAAAAAATGGGGTTGACTGCCTTTTTTGGTAAAGAAAGGAAAAGAAATCCTTCTATCGAATATCGAAACTCCATAAAGGATGAAGGATAAGCGTATATACACTATGTATACACAATGAAAAACTATCTCAAAAATGACAACCGAATCCGTATTTTTTTTTATGAAAAAAAAAAAAATTGTTATGAATCAATTCCAAGTTGAAAAAAGAATCGAATATTCATTGATCAAATCATTCACTCCATAGTCTGATCGATCTTTTCTTTTGAAAAACTGATTAATCGGACAAAAATAAAGATAGAGTCCCATTCTACATGTCAATATCAATACCGGCAACAATGAAATTTAAAGTAAGAGGAAAATCCGTCGACTTTAAAAATCGGGAGGGTTCAAGTCCCCCTTTTTCCCCAA
>BS08
TCTCTGACTAGCTGCTATTGAGCCCCATCTACAAATGGATAATTCTGTCTTAGTGGAGACGAGTTTTTGAAAATAACGGAGAAATACCGACTCTCTTGCAAGAGAGTCGGTATTTCTCCGTTATTTTTTATGTTTTTCCTTAGTAGTTTTTTATTTCTATCTTTTTTTTACGGGAAGTATTTTTATGCTTTTGCTTTGATTTTGTCTGATATTTTTGTTATGGTTAAGGGCTCATATTCGTTATGTACCAGTATAATAATATTAGTTATTTGTTAATCCCACTAATAAAGTTCTAATTTTATTAATTCGATTCTAATTTTCGAATTTTTTAGTTTTTTTAATATAAAATAAAAGAAAAGAGAAAGTTGTAATTTTATGCCTCTTAAATCTTCATTTCTATTTTAAATGGTAGAAATTGAAACCTTTTTATTAAATATTTTATTAAATAGAAATAAAAAAAATTTTAAATCGTGGAGGAAGGGGGGGCGGATGTAGCCAAGTGGATCAAGGCAGTGGATTGTGAATCCCCCAAGACCGAAGAATATGGCTGAGCTGGTATGGAACCTACTAAGTGATAACTTTCAAATTCAGAGAAACCCTGGAATCAAAAATGGGCAATCCTGAGCCAAATCCTGTTTTACAAGAACAAACAAGGGTTCAGAAAGCGAAAAAAAAAAAGGGGGATAGGTGCAGAGACTCAACGGAAGCTGTTCTAAGAAATGGGGTTGACTGCCTTTTTTGGTAAAGAAAGGAAAAGAAATCCTTCTATCGAATATCGAAACTCCATAAAGGATGAAGGATAAGCGTATATACACTATGTATACACAATGAAAAACTATCTCAAAAATGACAACCGAATCCGTATTTTTTTTTATGAAAAAAAAAAAAATTGTTATGAATCAATTCCAAGTTGAAAAAAGAATCGAATATTCATTGATCAAATCATTCACTCCATAGTCTGATCGATCTTTTCTTTTGAAAAACTGATTAATCGGACAAAAATAAAGATAGAGTCCCATTCTACATGTCAATATCAATACCGGCAACAATGAAATTTAAAGTAAGAGGAAAATCCGTCGACTTTAAAAATCGTGAGGGTTCAAGTCCTTTTTTTCCCCAA
>BS09
ATCACTGACTAGCTGCTATTGAGCCCCATCTACAAATGGATAATTCTGTCTTAGTGGAGACGAGTTTTTGAAAATAACGGAGAAATACCGACTCTCTTGCAAGAGAGTCGGTATTTCTCCGTTATTTTTTATGTTTTTCTTTAGTAGTTTTTTATTTCTATCTTTTTTTTACGAAAAGTATTTTTATGCTTTTGCTTTGATTTTGTCTGATATTTTTGTTATGGTTATGGGCTCATATTCGTTATGTACCAGTATAATAATATTAGTTATTTGTTAATCCCACTAATAAAGTTCTAATTTTATTAATTCGATTCTAATTTTCGAATTTTTTAGTTTTTTTAATATAAAATAAAAGAAAAGAGAAAGTTGTAATTTTATGCCTCTTAAATCTTCATTTCTATTTTAAATGGTAGAAATTGAAACCTTTTTATTAAATATTTTATTAAATACAAATAAAAAAAATTTTAAATCGTGGAGGAAGGGGGGGCGGATGTAGCCAAGTGGATCAAGGCAGTGGATTGTGAATCCACCAAAAACGACGAACGATGCTGAGCTTGGTATGGAACCTACTAAGTGATAACTTTCAAATTCAGAGAAACCCTGGAATCAAAAATGGGCAATCCTGAGCCAAATCCTGTTTTACAAGAACAAACAAGGGTTCAGAAAGCGAAAAAAAAAAAGGGGGATAGGTGCAGAGACTCAACGGAAGCTGTTCTAAGAAATGGGGTTGACTGCCTTTTTTGGTAAAGAAAGGAAAAGAAATCCTTCTATCGAATATCGAAACTCCATAAAGGATGAAGGATAAGCGTATATACACTATGTATACACAATGAAAAACTATCTCAAAAATGACAACCGAATCCGTATTTTTTTTTATGAAAAAAAAAAAAATTGTTATGAATCAATTCCAAGTTGAAAAAAGAATCGAATATTCATTGATCAAATCATTCACTCCATAGTCTGATCGATCTTTTCTTTTGAAAAACTGATTAATCGGACAAGAATAAAGATAGAGTCCCATTCTACATGTCAATATCAATACCGGCAACAATGAAATTTAAAGTAAGAGGAAAATCCGTCGACTTTAAAAATCGTGAGGGTTCAAGTCCCCTTTTTCCCCAAA
>BS10
ATCACTGACTAGCTGCTATTGAGCCCCATCTACAAATGGATAATTCTGTCTTAGTGGAGACGAGTTTTTGAAAATAACGGAGAAATACCGACTCTCTTGCAAGATAGTCGGTATTTCTCCGTTATTTTTTATGTTTTTCCTTAGAGGCTTTTTATTTCAACTTTTTCTTTTCGAAAATTTTATTTTAGAAAAACTAAAAAATTTTGAAATAAAATTCTGTTTTGGATAATAGCAACTTTATTAGTGGGATTAACAAATTCTAATATTATTATACTGGTACATAACGAATATGAGCCCATTCCATAACAAAAATCTCATACAAAATCTTTTCAAAAGCTTAAAAATACTTTTCATAAAAAAAAGATAGTTGTAAAAAACTGCCACTGAAAAACATAAAAAATAACGGAAAAATAGAAATTGAAACCTTTTTATTAAATATTTTATTAAATACAAATAAAAAAAATTTTAAATCTTGGAGGAAGGGGGGGCGGATGTAGCCAAGTGGATCCAGGCAGTGGATTGGGAATCCACCAAGACCGAGGTAGCATTACGTTCATGCATAACAAGTTTGCTGAGCTTGGTATGGAACCTACTAAGTGATAACTTTCAAATTCAGAGAAACCCTGGAATCAAAAATGGGCAATCCTGAGCCAAATCCTGTTTTACAAGAACAAACAAGGGTTCAGAAAGCGAAAAAAAAAAAGGGGGATAGGTGCAGAGACTCAACGGAAGCTGTTCTAAAAAATGGGGTTGACTGCCTTTTTTGGTAAAGAAAGGAAAAGAAATCCTTCTATCGAATATCGAAACTCCATAAAGGATGAAGGATAAGCGTATATACACTATGTATACACAATGAAAAACTATCTCAAAAATGACAACCGAATCCGTATTTTTTTTTATGAAAAAAAAAAAAATTGTTATGAATCAATTCCAAGTTGAAAAAAGAATCGAATATTCATTGATCAAATCATTCACTCCATAGTCTGATCGATCTTTTCTTTTGAAAAACTGATTAATCGGACAAGAATAAAGATAGAGTCCCATTCTACATGTCAATATCAATACCGGCAACAATGAAATTTAGAGTAAGAGGAAAATCCGTCGACTTTAGAAATCGTGAGGGTTCAAGTCCCTCCTATCCCCA
>BS11
ATTCTTGACTAGCTGCTATTGAGCCCCATCTACAAATGGATAATTCTGTCTTAGTGGAGACGAGTTTTTGAAAATAACGGAGAAATACCGACTCTCTTGCAAGAGAGTCGGTATTTCTCCGTTATTTTTTATGTTTTTCTTTAGTAGTTTTTTATTTCTATCTTTTTTTTACGAAAAGTATTTTTATGCTTTTGCTTTTATTTTGTCTGATATTTTTGTTATGGTTATGGGCTCATATTCGTTATGTACCAGTATAATAATATTAGTTATTTGTTAATCCCACTAATAAAGTTCTAATTTTATTAATTCGATTCTAATTTTCGAATTTTTTAGTTTTTTTAATATAAAATAAAAGAAAAGAGAAAGTTGTAATTTTATGCCTCTTAAATCTTCATTTCTATTTTAAATGGTAGAAATTGAAACCTTTTTATTAAATATTTTATTAAATAGAAATAAAAAAAATTTTAAATCTTGGAGGAAGGGGGGGCGGATGTAGCCAAGTGGATCAAGGCAGTGGATTGTGAATCCCCCATGAGCGAGAAGGCATGATGAGCTTGGTATGGAACCTACTAAGTGATAACTTTCAAATTCAGAGAAACCCTGGAATCAAAAATGGGCAATCCTGAGCCAAATCCTGTTTTACAAGAACAAACAAGGGTTCAGAAAGCGAAAAAAAAAAAGGGGGATAGGTGCAAAAACTCAACGGAAGCTGTTCTAAAAAATGGGGTTGACTGCCTTTTTTGGTAAAAAAAGGAAAAAAAATCCTTCTATCGAATATCGAAACTCCATAAAGGATGAAGGATAAGCGTATATACACTATGTATACACAATGAAAAACTATCTCAAAAATGACAACCGAATCCGTATTTTTTTTTATGAAAAAAAAAAAAATTGTTATGAATCAATTCCAAGTTGAAAAAAGAATCGAATATTCATTGATCAAATCATTCACTCCATAGTCTGATCGATCTTTTCTTTTGAAAAACTGATTAATCGGACAAAAATAAAGATAGAGTCCCATTCTACATGTCAATATCAATACCGGCAACAATGAAATTTAAAGTAAGAGGAAAATCCGTCGACTTTAAAAATCGTGAGGGTTCAAGTCCTTCTTATCCCCA
>LD01
ATCACTGACTAGCTGCTATTGAGCCCCATCTACAAATGGATAATTCTGTCTTAGTGGAGACGAGTTTTTGAAAATAACGGAGAAATACCGACTCTCTTGCAAGAGAGTCGGTATTTCTCCGTTATTTTTTATGTTTTTCTTTAGTAGTTTTTTATTTCTATCTTTTTTTTACGAAAAGTATTTTTATGCTTTTGCTTTGATTTTGTCTGATATTTTTGTTATGGTTATGGGCTCATATTCGTTATGTACCAGTATAATAATATTAGTTATTTGTTAATCCCACTAATAAAGTTCTAATTTTATTAATTCGATTCTAATTTTCGAATTTTTTAGTTTTTTTAATATAAAATAAAAGAAAAGAGAAAGTTGTAATTTTATGCCTCTTAGATCTTCATTTCTATTTTAATCATTTCTATTTTAAATGGTAGAAATTGAAACCTTTTTATTAAATATTTTATTAAATAGAAATAAAAAAATTTTTAAATCGTGGAGGAAGGGGGGGCGGATGTAGCCAAGTGGATCAAGGCAGTGGATTGTGAATCCACCAAAACGCGAGCGACCGATGGATGAGCTTGGTATGGAACCTACTAAGTGATAACTTTCAAATTCAGAGAAACCCTGGAATCAAAAATGGGCAATCCTGAGCCAAATCCTGTTTTACAAGAACAAACAAGGGTTCAGAAAGCGAAAAAAAAAAAGGGGGATAGGTGCAGAGACTCAACGGAAGCTGTTCTAAGAAATGGGGTTGACTGCCTTTTTTGGTAAAGAAAGGAAAAGAAATCCTTCTATCGAATATCGAAACTCCATAAAGGATGAAGGATAAGCGTATATACACTATGTATACACAATGAAAAACTATCTCAAAAATGACAACCGAATCCGTATTTTTTTTTATGAAAAAAAAAAAAATTGTTATGAATCAATTCCAAGTTGAAAAAAGAATCGAATATTCATTGATCAAATCATTCACTCCATAGTCTGATCGATCTTTTCTTTTGAAAAACTGATTAATCGGACAAAAATAAAGATAGAGTCCCATTCTACATGTCAATATCAATACCGGCAACAATGAAATTTAAAGTAAGAGGAAAATCCGTCGACTTTAAAAATCGTGAGGGTTCAAGTCCTCTTATCCCCAAA
>LD02
CCTCTGACTAGCTGCTATTGAGCCCCATCTACAAATGGATAATTCTGTCTTAGTGGAGACGAGTTTTTGAAAATAACGGAGAAATACCGACTCTCTTGCAAGAGAGTCGGTATTTCTCCGTTATTTTTTATGTTTTTCTTTAGTAGTTTTTTATTTCTATCTTTTTTTTACGGGCAGTATTTTTATGCTTTTGCTTTGGTTTGTCTGATATTTTTGTTATGGTTATGGGCTCATATTCGTTATGTACCAGTATAATAATATTAGTTATTTGTTAATCCCACTAATAAAGTTCTAATTTTATTAATTCGATTCTAATTTTCGAATTTTTTAGTTTTTTTAATATAAAATAAAAGAAAAGAGAAAGTTGTAATTTTATGCCTCTTAGATCTTCATTTCTATTTTAATCATTTCTATTTTAAATGGTAGAAATTGAAACCTTTTTATTAAATATTTTATTAAATAGAAATAAAAAAATTTTTAAATCGTGGAGGAAGGGGGGGCGGATGTAGCCAAGTGGATCAAGGCAGTGGATTGTGAATCCACCATGCGCGACGAGCTCAACTCCCGTCCTTCGCCCATTTAGTTGAGACCCGGATTGTGGATGCATGAGCTGGTATGGAACCTACTAAGTGATAACTTTCAAATTCAGAGAAACCCTGGAATCAAAAATGGGCAATCCTGAGCCAAATCCTGTTTTACAAGAACAAACAAGGGTTCAGAAAGCGAAAAAAAAAAAGGGGGATAGGTGCAGAGACTCAACGGAAGCTGTTCTAAAAAATGGGGTTGACTGCCTTTTTTGGTAAAGAAAGGAAAAAAAATCCTTCTATCGAATATCGAAACTCCATAAAGGATGAAGGATAAGCGTATATACACTATGTATACACAATGAAAAACTATCTCAAAAATGACAACCGAATCCGTATTTTTTTTTATGAAAAAAAAAAAAATTGTTATGAATCAATTCCAAGTTGAAAAAAGAATCGAATATTCATTGATCAAATCATTCACTCCATAGTCTGATCGATCTTTTCTTTTGAAAAACTGATTAATCGGACAAAAATAAAGATAGAGTCCCATTCTACATGTCAATATCAATACCGGCAACAATGAAATTTAAAGTAAGAGGAAAATCCGTCGACTTTAAAAATCGTGAGGGTTCAAGTCCTCTTATCCCCCAA
>LD03
ATTCTCTGACTAGCTGCTATTGAGCCCCATCTACAAATGGATAATTCTGTCTTAGTGGAGACGAGTTTTTGAAAATAACGGAGAAATACCGACTCTCTTGCAAGAGAGTCGGTATTTCTCCGTTATTTTTTATGTTTTTCTTTAGTAGTTTTTTATTTCTATCTTTTTTTTACGAAAAGTATTTTTATGCTTTTGCTTTTATTTTGTCTGATATTTTTGTTATGGTTATGGGCTCATATTCGTTATGTACCAGTATAATAATATTAGTTATTTGTTAATCCCACTAATAAAGTTCTAATTTTATTAATTCGATTCTAATTTTCGAATTTTTTAGTTTTTTTAATATAAAATAAAAGAAAAGAGAAAGTTGTAATTTTATGCCTCTTAGATCTTCATTTCTATTTTAATCATTTCTATTTTAAATGGTAGAAATTGAAACCTTTTTATTAAAAATTTTATTAAATAGAAATAAAAAAATTTTTAAATCGTGGAGGAAGGGGGGGCGGATGTAGCCAAGTGGATCAAGGCAGTGGATTGTGAATCCCCCCTGAGCGAGAGGATTGGCTGAGCTTGGTATGGACCTACTAAGTGATAACTTTCAAATTCAGAGAAACCCTGGAATCAAAAATGGGCAATCCTGAGCCAAATCCTGTTTTACAAGAACAAACAAGGGTTCAGAAAGCGAAAAAAAAAAAGGGGGATAGGTGCAGAGACTCAACGGAAGCTGTTCTAAAAAATGGGGTTGACTGCCTTTTTTGGTAAAGAAAGGAAAAGAAATCCTTCTATCGAATATCGAAACTCCATAAAGGATGAAGGATAAGCGTATATACACTATGTATACACAATGAAAAACTATCTCAAAAATGACAACCGAATCCGTATTTTTTTTTATGAAAAAAAAAAAAATTGTTATGAATCAATTCCAAGTTGAAAAAAGAATCGAATATTCATTGATCAAATCATTCACTCCATAGTCTGATCGATCTTTTCTTTTGAAAAACTGATTAATCGGACAAAAATAAAGATAGAGTCCCATTCTACATGTCAATATCAATACCGGCAACAATGAAATTTAAAGTAAGAGGAAAATCCGTCGACTTTAAAAATCGTGAGGGTTCAAGTCCTTCTTTTCCCCAA
>LD04
ATTCTCTGACTAGCTGCTATTGAGCCCCATCTACAAATGGATAATTCTGTCTTAGTGGAGACGAGTTTTTGAAAATAACGGAGAAATACCGACTCTCTTGCAAGAGAGTCGGTATTTCTCCGTTATTTTTTATGTTTTTCTTTAGTAGTTTTTTATTTCTATCTTTTTTTTACGAAAAGTATTTTTATGCTTTTGCTTTGATTTTGTCTGATATTTTTGTTATGGTTATGGGCTCATATTCGTTATGTACCAGTATAATAATATTAGTTATTTGTTAATCCCACTAATAAAGTTCTAATTTTATTAATTCGATTCTAATTTTCGAATTTTTTAGTTTTTTTAATATAAAATAAAAGAAAAGAGAAAGTTGTAATTTTATGCCTCTTAGATCTTCATTTCTATTTTAATCATTTCTATTTTAAATGGTAGAAATTGAAACCTTTTTATTAAAAATTTTATTAAATAGAAATAAAAAAATTTTTAAATCTTGGAGGAAGGGGGGGCGGATGTGGCCAAGTGGATCAAGGCAGTGGATTGTGAATCCACCATGAGCGAGGACGATGCTGAGCTTGGTATGGAACCTACTAAGTGATAACTTTCAAATTCAGAGAAACCCTGGAATCAAAAATGGGCAATCCTGAGCCAAATCCTGTTTTACAAGAACAAACAAGGGTTCAGAAAGCGAAAAAAAAAAAGGGGGATAGGTGCAGAGACTCAACGGAAGCTGTTCTAAGAAATGGGGTTGACTGCCTTTTTTGGTAAAGAAAGGAAAAGAAATCCTTCTATCGAATATCGAAACTCCATAAAGGATGAAGGATAAGCGTATATACACTATGTATACACAATGAAAAACTATCTCAAAAATGACAACCGAATCCGTATTTTTTTTTATGAAAAAAAAAAAAATTGTTATGAATCAATTCCAAGTTGAAAAAAGAATCGAATATTCATTGATCAAATCATTCACTCCATAGTCTGATCGATCTTTTCTTTTGAAAAACTGATTAATCGGACAAAAATAAAGATAGAGTCCCATTCTACATGTCAATATCAATACCGGCAACAATGAAATTTAAAGTAAGAGGAAAATCCGTCGACTTTAAAAATCGTGAGGGTTCAAGTCCCTCTTTTCCCCAA
>LD05
ATCTTGACTAGCTGCTATTGAGCCCCATCTACAAATGGATAATTCTGTCTTAGTGGAGACGAGTTTTTGAAAATAACGGAGAAATACCGACTCTCTTGCAAGAGAGTCGGTATTTCTCCGTTATTTTTTATGTTTTTCTTTAGTAGTTTTTTATTTCTATCTTTTTTTTACGAAAAGTATTTTTATGCTTTTGCTTTGGAAGTGTCTGATATTTTTGTTATGGTTATGGGCTCATATTCGTTATGTACCAGTATAATAATATTAGTTATTTGTTAATCCCACTAATAAAGTTCTAATTTTATTAATTCGATTCTAATTTTCGAATTTTTTAGTTTTTTTAATATAAAATAAAAGAAAAGAGAAAGTTGTAATTTTATGCCTCTTAGATCTTCATTTCTATTTTAATCATTTCTATTTTAAATGGTAGAAATTGAAACCTTTTTATTAAATATTTTATTAAATAGAAATAAAAAAATTTTTAAATCGTGGAGGAAGGGGGGGCGGATGTAGCCAAGTGGATCAAGGCAGTGGATTGTGAATCCACCAAGACCGAGCGATGGATGAGCTGGTATGGAACCTACTAAGTGATAACTTTCAAATTCAGAGAAACCCTGGAATCAAAAATGGGCAATCCTGAGCCAAATCCTGTTTTACAAGAACAAACAAGGGTTCAGAAAGCGAAAAAAAAAAAGGGGGATAGGTGCAGAGACTCAACGGAAGCTGTTCTAAGAAATGGGGTTGACTGCCTTTTTTGGTAAAGAAAGGAAAAGAAATCCTTCTATCGAATATCGAAACTCCATAAAGGATGAAGGATAAGCGTATATACACTATGTATACACAATGAAAAACTATCTCAAAAATGACAACCGAATCCGTATTTTTTTTTATGAAAAAAAAAAAAATTGTTATGAATCAATTCCAAGTTGAAAAAAGAATCGAATATTCATTGATCAAATCATTCACTCCATAGTCTGATCGATCTTTTCTTTTGAAAAACTGATTAATCGGACAAAAATAAAGATAGAGTCCCATTCTACATGTCAATATCAATACCGGCAACAATGAAATTTAAAGTAAGAGGAAAATCCGTCGACTTTAAAAATCGTGAGGGTTCAAGTCCTTTTTTACCCCAAA
>LD06
CCTCTGACTAGCTGCTATTGAGCCCCATCTACAAATGGATAATTCTGTCTTAGTGGAGACGAGTTTTTGAAAATAACGGAGAAATACCGACTCTCTTGCAAGAGAGTCGGTATTTCTCCGTTATTTTTTATGTTTTTCTTTAGTAGTTTTTTATTTCTATCTTTTTTTTACGGGCAGTATTTTTATGCTTTTGCTTTGATTTTGTCTGATATTTTTGTTATGGTTATGGGCTCATATTCGTTATGTACCAGTATAATAATATTAGTTATTTGTTAATCCCACTAATAAAGTTCTAATTTTATTAATTCGATTCTAATTTTCGAATTTTTTAGTTTTTTTAATATAAAATAAAAGAAAAGAGAAAGTTGTAATTTTATGCCTCTTAGATCTTCATTTCTATTTTAATCATTTCTATTTTAAATGGTAGAAATTGAAACCTTTTTATTAAATATTTTATTAAATACAAATAAAAAAATTTTTAAATCGTGGAGGAAGGGGGGGCGGATGTAGCCAAGTGGATCAAGGCAGTGGATTGTGAATCCACCAAGACGCGACGAATCATGCATGAGCTGGTATGGAACCTACTAAGTGATAACTTTCAAATTCAGAGAAACCCTGGAATCAAAAATGGGCAATCCTGAGCCAAATCCTGTTTTACAAGAACAAACAAGGGTTCAGAAAGCGAAAAAAAAAAAGGGGGATAGGTGCAGAGACTCAACGGAAGCTGTTCTAAGAAATGGGGTTGACTGCCTTTTTTGGTAAAGAAAGGAAAAGAAATCCTTCTATCGAATATCGAAACTCCATAAAGGATGAAGGATAAGCGTATATACACTATGTATACACAATGAAAAACTATCTCAAAAATGACAACCGAATCCGTATTTTTTTTTATGAAAAAAAAAAAAATTGTTATGAATCAATTCCAAGTTGAAAAAAGAATCGAATATTCATTGATCAAATCATTCACTCCATAGTCTGATCGATCTTTTCTTTTGAAAAACTGATTAATCGGACAAAAATAAAGATAGAGTCCCATTCTACATGTCAATATCAATACCGGCAACAATGAAATTTAAAGTAAGAGGAAAATCCGTCGACTTTAAAAATCGTGAGGGTTCAAGTCCTTTTTATTCCCCCAA
>LD07
ATTCACTGACTGCTGCTATTGAGCCCCATCTACAAATGGATAATTCTGTCTTAGTGGAGACGAGTTTTTGAAAATAACGGAGAAATACCGACTCTCTTGCAAGAGAGTCGGTATTTCTCCGTTATTTTTTATGTTTTTCTTTAGTAGTTTTTTATTTCTATCTTTTTTTTACGGGCTGTATTTTTATGCTTTTGCTTTGGTTTGTCTGATATTTTTGTTATGGTTATGGGCTCATATTCGTTATGTACCAGTATAATAATATTAGTTATTTGTTAATCCCACTAATAAAGTTCTAATTTTATTAATTCGATTCTAATTTTCGAATTTTTTAGTTTTTTTAATATAAAATAAAAGAAAAGAGAAAGTTGTAATTTTATGCCTCTTAGATCTTCATTTCTATTTTAATCATTTCTATTTTAAATGGTAGAAATTGAAACCTTTTTATTAAATATTTTATTAAATAGAAATAAAAAAATTTTTAAATCGTGGAGGAAGGGGGGGCGGATGTAGCCAAGTGGATCATGGCAGTGGATTGTGAATCCACCATGAGCGACCTTTTGGCATGAGCTTGGTATGGAACCTACTAAGTGATAACTTTCAAATTCAGAGAAACCCTGGAATCAAAAATGGGCAATCCTGAGCCAAATCCTGTTTTACAAGAACAAACAAGGGTTCAGAAAGCGAAAAAAAAAAAGGGGGATAGGTGCAGAGACTCAACGGAAGCTGTTCTAAGAAATGGGGTTGACTGCCTTTTTTGGTAAAGAAAGGAAAAGAAATCCTTCTATCGAATATCGAAACTCCATAAAGGATGAAGGATAAGCGTATATACACTATGTATACACAATGAAAAACTATCTCAAAAATGACAACCGAATCCGTATTTTTTTTTATGAAAAAAAAAAGAATTGTTATGAATCAATTCCAAGTTGAAAAAAGAATCGAATATTCATTGATCAAATCATTCACTCCATAGTCTGATCGATCTTTTCTTTTGAAAAACTGATTAATCGGACAAGAATAAAGATAGAGTCCCATTCTACATGTCAATATCAATACCGGCAACAATGAAATTTAAAGTAAGAGGAAAATCCGTCGACTTTAAAAATCGTGAGGGTTCAAGTCCTTTTTTTCCCCCA
>LD08
ATTCTTGACTAGCTGCTATTGAGCCCCATCTACAAATGGATAATTCTGTCTTAGTGGAGACGAGTTTTTGAAAATAACGGAGAAATACCGACTCTCTTGCAAGAGAGTCGGTATTTCTCCGTTATTTTTTATGTTTTTCTTTAGTAGTTTTTTATTTCTATCTTTTTTTTACGAAAAGTATTTTTATGCTTTTGCTTTGATTTTGTCTGATATTTTTGTTATGGTTATGGGCTCATATTCGTTATGTACCAGTATAATAATATTAGTTATTTGTTAATCCCACTAATAAAGTTCTAATTTTATTAATTCGATTCTAATTTTCGAATTTTTTAGTTTTTTTAATATAAAATAAAAGAAAAGAGAAAGTTGTAATTTTATGCCTCTTAGATCTTCATTTCTATTTTAATCATTTCTATTTTAAATGGTAGAAATTGAAACCTTTTTATTAAATATTTTATTAAATAGAAATAAAAAAATTTTTAAATCGTGGAGGAAGGGGGGGCGGATGTAGCCAAGTGGATCAAGGCAGTGGATTGTGAATCCACCATGAGCGAAGAATGATGGCTGAGCTTGGTATGGAACCTACTAAGTGATAACTTTCAAATTCAGAGAAACCCTGGAATCAAAAATGGGCAATCCTGAGCCAAATCCTGTTTTACAAGAACAAACAAGGGTTCAGAAAGCGAAAAAAAAAAAGGGGGATAGGTGCAGAGACTCAACGGAAGCTGTTCTAAAAAATGGGGTTGACTGCCTTTTTTGGTAAAGAAAGGAAAAGAAATCCTTCTATCGAATATCGAAACTCCATAAAGGATGAAGGATAAGCGTATATACACTATGTATACACAATGAAAAACTATCTCAAAAATGACAACCGAATCCGTATTTTTTTTTATGAAAAAAAAAAAAATTGTTATGAATCAATTCCAAGTTGAAAAAAGAATCGAATATTCATTGATCAAATCATTCACTCCATAGTCTGATCGATCTTTTCTTTTGAAAAACTGATTAATCGGACAAAAATAAAGATAGAGTCCCATTCTACATGTCAATATCAATACCGGCAACAATGAAATTTAAAGTAAGAGGAAAATCCGTCGACTTTAAAAATCGTGAGGGTTCAAGTCCCCCTTATCCCCAA
>LD09
TATCTGACTAGCTGCTATTGAGCCCCATCTACAAATGGATAATTCTGTCTTAGTGGAGACGAGTTTTTGAAAATAACGGAGAAATACCGACTCTCTTGCAAGAGAGTCGGTATTTCTCCGTTATTTTTTATGTTTTTCTTTAGTAGTTTTTTATTTCTATCTTTTTTTTACGAAAAGTATTTTTATGCTTTTGCTTTGATTTTGTCTGATATTTTTGTTATGGTTATGAGCTCATATTCGTTATGTACCAGTATAATAATATTAGTTATTTGTTAATCCCACTAATAAAGTTCTAATTTTATTAATTCGATTCTAATTTTCGAATTTTTTAGTTTTTTTAATATAAAATAAAAGAAAAGAGAAAGTTGTAATTTTATGCCTCTTAGATCTTCATTTCTATTTTAATCATTTCTATTTTAAATGGTAGAAATTGAAACCTTTTTATTAAATATTTTATTAAATACAAATAAAAAAATTTTTAAATCGTGGAGGAAGGGGGGGCGGATGTAGCCAAGTGGATCAAGGCAGTGGATTGTGAATCCCCCATGAGCGACGATGCATGAGCTTGGTATGGAACCTACTAAGTGATAACTTTCAAATTCAGAGAAACCCTGGAATCAAAAATGGGCAATCCTGAGCCAAATCCTGTTTTACAAGAACAAACAAGGGTTCAGAAAGCGAAAAAAAAAAAGGGGGATAGGTGCAGAGACTCAACGGAAGCTGTTCTAAAAAATGGGGTTGACTGCCTTTTTTGGTAAAGAAAGGAAAAGAAATCCTTCTATCGAATATCGAAACTCCATAAAGGATGAAGGATAAGCGTATATACACTATGTATACACAATGAAAAACTATCTCAAAAATGACAACCGAATCCGTATTTTTTTTTATGAAAAAAAAAAAAATTGTTATGAATCAATTCCAAGTTGAAAAAAGAATCGAATATTCATTGATCAAATCATTCACTCCATAGTCTGATCGATCTTTTCTTTTGAAAAACTGATTAATCGGACAAAAATAAAGATAGAGTCCCATTCTACATGTCAATATCAATACCGGCAACAATGAAATTTAAAGTAAGAGGAAAATCCGTCGACTTTAAAAATCGTGAGGGTTCAAGTCCTTCTATCCCCCAA
>LD10
AGTTCACTGACTGCTGCTATTGAGCCCCATCTACAAATGGATAATTCTGTCTTAGTGGAGACGAGTTTTTGAAAATAACGGAGAAATACCGACTCTCTTGCAAGAGAGTCGGTATTTCTCCGTTATTTTTTATGTTTTTCTTTAATAGTTTTTTATTTCTATCTTTTTTTTACGAAAAGTATTTTTATGCTTTTGCTTTTATTTTGTCTGATATTTTTGTTATGGGTATGAGCTCATATTCGTTATGTACCAGTATAATAATATTAGTTATTTGTTAATCCCCCTAATAAAGTTCTAATTTTATTAATTCTATTCTAATTTTCGAATTTTTTATTTTTTTTAATATAAAATAAAAAAAAAAAGAAAGTTGTAATTTTATGCCCCTTAGATCTTCATTTCTATTTTAATCATTTCTATTTTAAATGGGAGAAATTGAAACCCTTTTATTAAAAATTTTATTAAATAGAAATAAAAAAATTTTTAAATCTTGGAGGAAGGGGGGGCGGATGTAGCCAAGTGGATCAAGGCGGTGGATTGTGAATCCACCCTGAGCGAGAACGCATTGCTGAGCTTGGTATGGAACCTACTAAGTGATAACTTTCAAATTCAGAGAAACCCTGGAATCAAAAATGGGCAATCCTGAGCCAAATCCTGTTTTACAAGAACAAACAAGGGTTCAGAAAGCGAAAAAAAAAAAGGGGGATAGGTGCAGAGACTCAACGGAAGCTGTTCTAAGAAATGGGGTTGACTGCCTTTTTTGGTAAAGAAAGGAAAAGAAATCCTTCTATCGAATATCGAAACTCCATAAAGGATGAAGGATAAGCGTATATACACTATGTATACACAATGAAAAACTATCTCAAAAATGACAACCGAATCCGTATTTTTTTTTATGAAAAAAAAAAAAATTGTTATGAATCAATTCCAAGTTGAAAAAAGAATCGAATATTCATTGATCAAATCATTCACTCCATAGTCTGATCGATCTTTTCTTTTGAAAAACTGATTAATCGGACAAGAATAAAGATAGAGTCCCATTCTACATGTCAATATCAATACCGGCAACAATGAAATTTAAAGTAAGAGGAAAATCCGTCGACTTTAAAAATCGTGAGGGTTCAAGTCCCTCTTTTCCCCAAGCT
>LD11
TTCACAGACTAGACTGCTATTGAGCCCCATCTACAAATGGATAATTCTGTCTTAGTGGAGACGAGTTTTTGAAAATAACGGAGAAATACCGACTCTCTTGCAAGAGAGTCGGTATTTCTCCGTTATTTTTTATGTTTTTCTTTAGTAGTTTTTTATTTCTATCTTTTTTTTACGAAAAGTATTTTTATGCTTTTGCTTTGATTTTGTCTGATATTTTTGTTATGGTTATGGGCTCATATTCGTTATGTACCAGTATAATAATATTAGTTATTTGTTAATCCCACTAATAAAGTTCTAATTTTATTAATTCGATTCTAATTTTCGAATTTTTTAGTTTTTTTAATATAAAATAAAAGAAAAGAGAAAGTTGTAATTTTATGCCTCTTAGATCTTCATTTCTATTTTAATCATTTCTATTTTAAATGGTAGAAATTGAAACCTTTTTATTAAATATTTTATTAAATAGAAATAAAAAAATTTTTAAATCGTGGAGGAAGGGGGGGCGGATGTAGCCAAGTGGATCAAGGCAGTGGATTGTGAATCCACCACACGCGATTTTGGCTGAGCTTGGTATGGAACCTACTAAGTGATAACTTTCAAATTCAGAGAAACCCTGGAATCAAAAATGGGCAATCCTGAGCCAAATCCTGTTTTACAAGAACAAACAAGGGTTCAGAAAGCGAAAAAAAAAAAGGGGGATAGGTGCAAAGACTCAACGGAAGCTGTTCTAAAAAATGGGGTTGACTGCCTTTTTTGGTAAAGAAAGGAAAAGAAATCCTTCTATCGAATATCGAAACTCCATAAAGGATGAAGGATAAGCGTATATACACTATGTATACACAATGAAAAACTATCTCAAAAATGACAACCGAATCCGTATTTTTTTTTATGAAAAAAAAAAAAATTGTTATGAATCAATTCCAAGTTGAAAAAAGAATCGAATATTCATTGATCAAATCATTCACTCCATAGTCTGATCGATCTTTTCTTTTGAAAAACTGATTAATCGGACAAAAATAAAGATAGAGTCCCATTCTACATGTCAATATCAATACCGGCAACAATGAAATTTAAAGTAAGAGGAAAATCCGTCGACTTTAAAAATCGTGAGGGTTCAAGTCCCTCCTATCCCCAACA
>LD12
TATTTGACTAGCTGCTATTGAGCCCCATCTACAAATGGATAATTCTGTCTTAGTGGAGACGAGTTTTTGAAAATAACGGAGAAATACCGACTCTCTTGCAAGAGAGTCGGTATTTCTCCGTTATTTTTTATGTTTTTCTTTAGTAGTTTTTTATTTCTATCTTTTTTTTACAAAAAGTATTTTTATGCTTTTGCTTTTATTTTGTCTGATATTTTTGTTATGGTTATGAGCTCATATTCGTTATGTACCAGTATAATAATATTAGTTATTTGTTAATCCCACTAATAAAGTTCTAATTTTATTAATTCTATTCTAATTTTCGAATTTTTTAGTTTTTTTAATATAAAAAAAAAAAAAAAAGAAAGTTGTAATTTTATGCCCCTTAGATCTTCATTTCTATTTTAATCATTTCTATTTTAAATGGGGGAAATTGAAACCCTTTTATTAAAAATTTTATTAAATACAAATAAAAAAATTTTTAAATCTTGGAGGAAGGGGGGGCGGATGTGGCCAAGTGGATCAAGGCAGTGGATTGTGAATCCACCCTAAGCGAGAAGCATTCATGCTGAGCTTGGTATGGAACCTACTAAGTGATAACTTTCAAATTCAGAGAAACCCTGGAATCAAAAATGGGCAATCCTGAGCCAAATCCTGTTTTACAAGAACAAACAAGGGTTCAGAAAGCGAAAAAAAAAAAGGGGGATAGGTGCAGAGACTCAACGGAAGCTGTTCTAAAAAATGGGGTTGACTGCCTTTTTTGGTAAAGAAAGGAAAAGAAATCCTTCTATCGAATATCGAAACTCCATAAAGGATGAAGGATAAGCGTATATACACTATGTATACACAATGAAAAACTATCTCAAAAATGACAACCGAATCCGTATTTTTTTTTATGAAAAAAAAAAAAATTGTTATGAATCAATTCCAAGTTGAAAAAAGAATCGAATATTCATTGATCAAATCATTCACTCCATAGTCTGATCGATCTTTTCTTTTGAAAAACTGATTAATCGGACAAAAATAAAGATAGAGTCCCATTCTACATGTCAATATCAATACCGGCAACAATGAAATTTAAAGTAAGAGGAAAATCCGTCGACTTTAAAAATCGTGAGGGTTCAAGTCCCTTTTTATCCCCAACTTA
>LD13
CGTCTGTGACTGCTGCTATTGAGCCCCATCTACAAATGGATAATTCTGTCTTAGTGGAGACGAGTTTTTGAAAATAACGGAGAAATACCGACTCTCTTGCAAGAGAGTCGGTATTTCTCAGTTATTTTTTATGTTTTTCTTTAGTAGTTTTTTATTTCTATCTTTTTTTTACGAAAAGTATTTTTATGCTTTTGCTTTGGTTTGTCTGATATTTTTGTTATGGTTATGGGCTCATATTCGTTATGTACCAGTATAATAATATTAGTTATTTGTTAATCCCACTAATAAAGTTCTAATTTTATTAATTCGATTCTAATTTTCGAATTTTTTAGTTTTTTTAATATAAAATAAAAGAAAAGAGAAAGTTGTAATTTTATGCCTCTTAGATCTTCATTTCTATTTTAATCATTTCTATTTTAAATGGTAGAAATTGAAACCCTTTTATTAAATATTTTATTAAATACAAATAAAAAAATTTTTAAATCGTGGAGGAAGGGGGGGCGGATGTAGCCAAGTGGATCAAGGCAGTGGATTGTGAATCCACCATGAGCGAGATGCTGAGCTTGGTATGGAACCTACTAAGTGATAACTTTCAAATTCAGAGAAACCCTGGAATCAAAAATGGGCAATCCTGAGCCAAATCCTGTTTTACAAGAACAAACAAGGGTTCAGAAAGCGAAAAAAAAAAAGGGGGATAGGTGCAGAGACTCAACGGAAGCTGTTCTAAAAAATGGGGTTGACTGCCTTTTTTGGTAAAGAAAGGAAAAGAAATCCTTCTATCGAATATCGAAACTCCATAAAGGATGAAGGATAAGCGTATATACACTATGTATACACAATGAAAAACTATCTCAAAAATGACAACCGAATCCGTATTTTTTTTTATGAAAAAAAAAAAAATTGTTATGAATCAATTCCAAGTTGAAAAAAGAATCGAATATTCATTGATCAAATCATTCACTCCATAGTCTGATCGATCTTTTCTTTTGAAAAACTGATTAATCGGACAAAAATAAAGATAGAGTCCCATTCTACATGTCAATATCAATACCGGCAACAATGAAATTTAAAGTAAGAGGAAAATCCGTCGACTTTAAAAATCGTGAGGGTTCAAGTCCTTTTTTCCCCCAA
>LD14
CGTCTCTGACTGCTGCTATTGAGCCCCATCTACAAATGGATAATTCTGTCTTAGTGGAGACGAGTTTTTGAAAATAACGGAGAAATACCGACTCTCTTGCAAGAGAGTCGGTATTTCTCAGTTATTTTTTATGTTTTTCTTTAGTAGTTTTTTATTTCTATCTTTTTTTTACGGGCTTTATTTTTATGCTTTTGCTTTGATTTTGTCTGATATTTTTGTTATGGTTAAGGGCTCATATTCGTTATGTACCAGTATAATAATATTAGTTATTTGTTAATCCCACTAATAAAGTTCTAATTTTATTAATTCGATTCTAATTTTCGAATTTTTTAGTTTTTTTAATATAAAATAAAAGAAAAGAGAAAGTTGTAATTTTATGCCTCTTAGATCTTCATTTCTATTTTAATCATTTCTATTTTAAATGGTAGAAATTGAAACCTTTTTATTAAATATTTTATTAAATAGAAATAAAAAAATTTTTAAATCGTGGAGGAAGGGGGGGCGGATGTAGCCAAGTGGATCAAGGCAGTGGATTGTGAATCCACCATGCGCGAGGAGCATTACGTTCATGCATAACAACATGCATGACTGGTTGGAACCTACTAAGTGATAACTTTCAAATTCAGAGAAACCCTGGAATCAAAAATGGGCAATCCTGAGCCAAATCCTGTTTTACAAGAACAAACAAGGGTTCAGAAAGCGAAAAAAAAAAAGGGGGATAGGTGCAGAGACTCAACGGAAGCTGTTCTAAGAAATGGGGTTGACTGCCTTTTTTGGTAAAGAAAGGAAAAGAAATCCTTCTATCGAATATCGAAACTCCATAAAGGATGAAGGATAAGCGTATATACACTATGTATACACAATGAAAAACTATCTCAAAAATGACAACCGAATCCGTATTTTTTTTTATGAAAAAAAAAAAAATTGTTATGAATCAATTCCAAGTTGAAAAAAGAATCGAATATTCATTGATCAAATCATTCACTCCATAGTCTGATCGATCTTTTCTTTTGAAAAACTGATTAATCGGACAAGAATAAAGATAGAGTCCCATTCTACATGTCAATATCAATACCGGCAACAATGAAATTTAGAGTAAGAGGAAAATCCGTCGACTTTAAAAATCGTGAGGGTTCAAGTCCTTCTTTTCCCCA
>TL01
TATTCTCTGACTAGCTGCTATTGAGCCCCATCTACAAATGGATAATTCTGTCTTAGTGGAGACGAGTTTTTGAAAATAACGGAGAAATACCGACTCTCTTGCAAGAGAGTCGGTATTTCTCCGTTATTTTTTATGTTTTTCTTTAGTAGTTTTTTATTTCTATCTTTTTTTTACGGGCAGTATTTTTATGCTTTTGCTTTGATTTTGTCTGATATTTTTGTTATGGTTATGGGCTCATATTCGTTATGTACCAGTATAATAATATTAGTTATTTGTTAATCCCACTAATAAAGTTCTAATTTTATTAATTCGATTCTAATTTTCGAATTTTTTAGTTTTTTTAATATAAAATAAAAGAAAAGAGAAAGTTGTAATTTTATGCCTCTTAGATCTTCATTTCTATTTTAATCATTTCTATTTTAAATGGTAGAAATTGAAACCCTTTTTTTAAAAATTTTATTAAACACAAATAAAAAAATTTTTAAATCGTGGAGGAAGGGGGGGCGGATGTAGCCAAGTGGATCATGGCAGTGGATTGTGAATCCACCATAAGCGAGGACTTAAGGCATGAGCTTGGTATGGACCTACTAAGTGATAACTTTCAAATTCAGAGAAACCCTGGAATCAAAAATGGGCAATCCTGAGCCAAATCCTGTTTTACAAGAACAAACAAGGGTTCAGAAAGCGAAAAAAAAAAAGGGGGATAGGTGCAGAGACTCAACGGAAGCTGTTCTAAGAAATGGGGTTGACTGCCTTTTTTGGTAAAGAAAGGAAAAGAAATCCTTCTATCGAATATCGAAACTCCATAAAGGATGAAGGATAAGCGTATATACACTATGTATACACAATGAAAAACTATCTCAAAAATGACAACCGAATCCGTATTTTTTTTTATGAAAAAAAAAAAAATTGTTATGAATCAATTCCAAGTTGAAAAAAGAATCGAATATTCATTGATCAAATCATTCACTCCATAGTCTGATCGATCTTTTCTTTTGAAAAACTGATTAATCGGACAAGAATAAAGATAGAGTCCCATTCTACATGTCAATATCAATACCGGCAACAATGAAATTTAAAGTAAGAGGAAAATCCGTCGACTTTAAAAATCGTGAGGGTTCAAGTCCTTTCTTATTCCCCAA
>TL02
TAGTCTCTGACTAGCTGCTATTGAGCCCCATCTACAAATGGATAATTCTGTCTTAGTGGAGACGAGTTTTTGAAAATAACGGAGAAATACCGACTCTCTTGCAAGAGAGTCGGTATTTCTCCGTTATTTTTTATGTTTTTCTTTAGTAGTTTTTTATTTCTATCTTTTTTTTGGGGCTGTATTTTTATGCTTTTGCTTTGATTTTGTCTGATATTTTTGTTATGGTTATGGGCTCATATTCGTTATGTACCAGTATAATAATATTAGTTATTTGTTAATCCCACTAATAAAGTTCTAATTTTATTAATTCGATTCTAATTTTCGAATTTTTTAGTTTTTTTAATATAAAATAAAAGAAAAGAGAAAGTTGTAATTTTATGCCTCTTAGATCTTCATTTCTATTTTAATCATTTCTATTTTAAATGGTAGAAATTGAAACCTTTTTATTAAATATTTTATTAAATAGAAATAAAAAAATTTTTAAATCGTGGAGGAAGGGGGGGCGGATGTAGCCAAGTGGGTCAAGGCAGTGGATTGTGAATCCACCAAGCGCGAGGACTTTTTGCATGAGCTGGTATGGACCTACTAAGTGATAACTTTCAAATTCAGAGAAACCCTGGAATCAAAAATGGGCAATCCTGAGCCAAATCCTGTTTTACAAGAACAAACAAGGGTTCAGAAAGCGAAAAAAAAAAAGGGGGATAGGTGCAGAGACTCAACGGAAGCTGTTCTAAAAAATGGGGTTGACTGCCTTTTTTGGTAAAGAAAGGAAAAGAAATCCTTCTATCGAATATCGAAACTCCATAAAGGATGAAGGATAAGCGTATATACACTATGTATACACAATGAAAAACTATCTCAAAAATGACAACCGAATCCGTATTTTTTTTTATGAAAAAAAAAAAAATTGTTATGAATCAATTCCAAGTTGAAAAAAGAATCGAATATTCATTGATCAAATCATTCACTCCATAGTCTGATCGATCTTTTCTTTTGAAAAACTGATTAATCGGACAAAAATAAAGATAGAGTCCCATTCTACATGTCAATATCAATACCGGCAACAATGAAATTTAAAGTAAGAGGAAAATCCGTCGACTTTAAAAATCGTGAGGGTTCAAGTCCTCTTTATTCCCAAA
>TL03
ATTCCTCAGACTAGCTGCTATTGAGCCCCATCTACAAATGGATAATTCTGTCTTAGTGGAGACGAGTTTTTGAAAATAACGGAGAAATACCGACTCTCTTGCAAGAGAGTCGGTATTTCTCCGTTATTTTTTATGTTTTTCTTTAGTAGTTTTTTATTTCTATCTTTTTTTTACGAAAAGTATTTTTATGCTTTTGCTTTGATTTTGTCTGATATTTTTGTTATGGTTATGAGCTCATATTCGTTATGTACCAGTATAATAATATTAGTTATTTGTTAATCCCACTAATAAAGTTCTAATTTTATTAATTCGATTCTAATTTTCGAATTTTTTAGTTTTTTTAATATAAAATAAAAGAAAAGAGAAAGTTGTAATTTTATGCCTCTTAGATCTTCATTTCTATTTTAATCATTTCTATTTTAAATGGTAGAAATTGAAACCTTTTTATTAAAAATTTTATTAAATAGAAATAAAAAAATTTTTAAATCGTGGAGGAAGGGGGGGCGGATGTAGCCAAGTGGATCAAGGCAGTGGATTGTGAATCCACCAACACGCGAGGGACTTTGCATGAGCTGGTATGGAACCTACTAAGTGATAACTTTCAAATTCAGAGAAACCCTGGAATCAAAAATGGGCAATCCTGAGCCAAATCCTGTTTTACAAGAACAAACAAGGGTTCAGAAAGCGAAAAAAAAAAAGGGGGATAGGTGCAGAGACTCAACGGAAGCTGTTCTAAAAAATGGGGTTGACTGCCTTTTTTGGTAAAAAAAGGAAAAAAAATCCTTCTATCGAATATCGAAACTCCATAAAGGATGAAGGATAAGCGTATATACACTATGTATACACAATGAAAAACTATCTCAAAAATGACAACCGAATCCGTATTTTTTTTTATGAAAAAAAAAAAAATTGTTATGAATCAATTCCAAGTTGAAAAAAAAATCGAATATTCATTGATCAAATCATTCACTCCATAGTCTGATCGATCTTTTCTTTTGAAAAACTGATTAATCGGACAAAAATAAAGATAGAGTCCCATTCTACATGTCAATATCAATACCGGCAACAATGAAATTTAAAGTAAGAGGAAAATCCGTCGACTTTAAAAATCGTGAGGGTTCAAGTCCTTCCTAATCCCCAA
>TL04
AATCACTGACTAGCTGCTATTGAGCCCCATCTACAAATGGATAATTCTGTCTTAGTGGAGACGAGTTTTTGAAAATAACGGAGAAATACCGACTCTCTTGCAAGAGAGTCGGTATTTCTCCGTTATTTTTTATGTTTTTCCTCAGTAGTTTTTTAATTCTATCTTTTTTTTGGGGCTTTATTTTTAGCCTTTTGCTTGGGAAGTGTCTGATATTTTTGTTATGGTTATGGGCTCATATTCGTTATGTACCAGTATAATAATATTAGTTATTTGTTAATCCCACTAATAAAGTTCTAATTTTATTAATTCGATTCTAATTTTCGAATTTTTTAGTTTTTTTAATATAAAATAAAAGAAAAGAGAAAGTTGTAATTTTATGCCTCTTAGATCTTCATTTCTATTTAAATCATTTCTATTTTAAATGGTAGAAATTGAAACCCTTTTTTTAAAAAATTTATTAAACACAAATAAAAAAATTTTTAATTCGTGGAGGAAGGGGGGGCGGATGTAGCCAAGTGGGTCGTTGCAGGGGATTGTTTATCCACCAACAAACGAGGGACCGCTTGCATGACTTGGTATGGACCTACTAAGTGATAACTTTCAAATTCAGAGAAACCCTGGAATCAAAAATGGGCAATCCTGAGCCAAATCCTGTTTTACAAGAACAAACAAGGGTTCAGAAAGCGAAAAAAAAAAAGGGGGATAGGTGCAGAGACTCAACGGAAGCTGTTCTAAAAAATGGGGTTGACTGCCTTTTTTGGTAAAGAAAGGAAAAGAAATCCTTCTATCGAATATCGAAACTCCATAAAGGATGAAGGATAAGCGTATATACACTATGTATACACAATGAAAAACTATCTCAAAAATGACAACCGAATCCGTATTTTTTTTTATGAAAAAAAAAAAAATTGTTATGAATCAATTCCAAGTTGAAAAAAGAATCGAATATTCATTGATCAAATCATTCACTCCATAGTCTGATCGATCTTTTCTTTTGAAAAACTGATTAATCGGACAAAAATAAAGATAGAGTCCCATTCTACATGTCAATATCAATACCGGCAACAATGAAATTTAAAGTAAGAGGAAAATCCGTCGACTTTAAAAATCGTGAGGGTTCAAGTCCCTCTTTATCCCCAA
>TL05
ATCTCTGACTAGCTGCTATTGAGCCCCATCTACAAATGGATAATTCTGTCTTAGTGGAGACGAGTTTTTGAAAATAACGGAGAAATACCGACTCTCTTGCAAGAGAGTCGGTATTTCTCCGTTATTTTTTATGTTTTTCTTTAGTAGTTTTTTATTTCTATCTTTTTTTTGGGGCAGTATTTTTATGCTTTTGCTTTGGAAGTGTCTGATATTTTTGTTATGGTTATGGGCTCATATTCGTTATGTACCAGTATAATAATATTAGTTATTTGTTAATCCCACTAATAAAGTTCTAATTTTATTAATTCGATTCTAATTTTCGAATTTTTTAGTTTTTTTAATATAAAATAAAAGAAAAGAGAAAGTTGTAATTTTATGCCTCTTAGATCTTCATTTCTATTTTAATCATTTCTATTTTAAATGGTAGAAATTGAAACCTTTTTATTAAAAATTTTATTAAATACAAATAAAAAAATTTTTAAATCGTGGAGGAAGGGGGGGCGGATGTAGCCAAGTGGATCAAGGCAGGGGATTGTTAATCCACCAACAAGCGAGCGAAGCTTGCATGACTTGGTATGGACCTACTAAGTGATAACTTTCAAATTCAGAGAAACCCTGGAATCAAAAATGGGCAATCCTGAGCCAAATCCTGTTTTACAAGAACAAACAAGGGTTCAGAAAGCGAAAAAAAAAAAGGGGGATAGGTGCAGAGACTCAACGGAAGCTGTTCTAAAAAATGGGGTTGACTGCCTTTTTTGGTAAAGAAAGGAAAAGAAATCCTTCTATCGAATATCGAAACTCCATAAAGGATGAAGGATAAGCGTATATACACTATGTATACACAATGAAAAACTATCTCAAAAATGACAACCGAATCCGTATTTTTTTTTATGAAAAAAAAAAAAATTGTTATGAATCAATTCCAAGTTGAAAAAAGAATCGAATATTCATTGATCAAATCATTCACTCCATAGTCTGATCGATCTTTTCTTTTGAAAAACTGATTAATCGGACAAAAATAAAGATAGAGTCCCATTCTACATGTCAATATCAATACCGGCAACAATGAAATTTAAAGTAAGAGGAAAATCCGTCGACTTTAAAAATCGTGAGGGTTCAAGTCCCTCTTTATCCCCAA
>TL06
ATTCTCTGACTAGCTGCTATTGAGCCCCATCTACAAATGGATAATTCTGTCTTAGTGGAGACGAGTTTTTGAAAATAACGGAGAAATACCGACTCTCTTGCAAGAGAGTCGGTATTTCTCCGTTATTTTTTATGTTTTTCTTTAATAGTTTTTTATTTCTATCTTTTTTTTACGGGCAGTATTTTTATGCTTTTGCTTTGATTTTGTCTGATATTTTTGTTATGGTTATGGGCTCATATTCGTTATGTACCAGTATAATAATATTAGTTATTTGTTAATCCCACTAATAAAGTTCTAATTTTATTAATTCGATTCTAATTTTCGAATTTTTTAGTTTTTTTAATATAAAATAAAAGAAAAGAGAAAGTTGTAATTTTATGCCTCTTAGATCTTCATTTCTATTTAAATCATTTCTATTTTAAATGGTAGAAATTGAAACCTTTTTATTAAAAAATTTATTAAACACAAATAAAAAAATTTTTAAATCGTGGAGGAAGGGGGGGCGGATGTAGCCAAGTGGATCAAGGCAGGGGATTGTGAATCCACCAACACACGAGCGAATTGCATGAGCTTGGTTGGACCTTACTTAAGTGATAACTTTCAAATTCAGAGAAACCCTGGAATCAAAAATGGGCAATCCTGAGCCAAATCCTGTTTTACAAGAACAAACAAGGGTTCAGAAAGCGAAAAAAAAAAAGGGGGATAGGTGCAGAGACTCAACGGAAGCTGTTCTAAAAAATGGGGTTGACTGCCTTTTTTGGTAAAGAAAGGAAAAGAAATCCTTCTATCGAATATCGAAACTCCATAAAGGATGAAGGATAAGCGTATATACACTATGTATACACAATGAAAAACTATCTCAAAAATGACAACCGAATCCGTATTTTTTTTTATGAAAAAAAAAAAAATTGTTATGAATCAATTCCAAGTTGAAAAAAGAATCGAATATTCATTGATCAAATCATTCACTCCATAGTCTGATCGATCTTTTCTTTTGAAAAACTGATTAATCGGACAAAAATAAAGATAGAGTCCCATTCTACATGTCAATATCAATACCGGCAACAATGAAATTTAAAGTAAGAGGAAAATCCGTCGACTTTAAAAATCGTGAGGGTTCAAGTCTTCTTTATCCCCCAA
>TL07
CTTTGACTAGCTGCTATTGAGCCCCATCTACAAATGGATAATTCTGTCTTAGTGGAGACGAGTTTTTGAAAATAACGGAGAAATACCGACTCTCTTGCAAGAGAGTCGGTATTTCTCCGTTATTTTTTATGTTTTTCTTTAGTAGTTTTTTATTTCTATCTTTTTTTTACGGGCAGTATTTTTATGCTTTTGCTTTGATTTTGTCTGATATTTTTGTTATGGTTATGGGCTCATATTCGTTATGTACCAGTATAATAATATTAGTTATTTGTTAATCCCACTAATAAAGTTCTAATTTTATTAATTCGATTCTAATTTTCGAATTTTTTAGTTTTTTTAATATAAAATAAAAGAAAAGAGAAAGTTGTAATTTTATGCCTCTTAGATCTTCATTTCTATTTTAATCATTTCTATTTTAAATGGTAGAAATTGAAACCTTTTTATTAAAAATTTTATTAAATACAAATAAAAAAATTTTTAAATCTTGGAGGAAGGGGGGGCGGATGTAGCCAAGTGGATCAAGGCAGGGGATTGTTAATCCACCAACAAGCGAGCGAACTGCATGAGCTGGTATGGACCTACTAAGTGATAACTTTCAAATTCAGAGAAACCCTGGAATCAAAAATGGGCAATCCTGAGCCAAATCCTGTTTTACAAGAACAAACAAGGGTTCAGAAAGCGAAAAAAAAAAAGGGGGATAGGTGCAGAGACTCAACGGAAGCTGTTCTAAAAAATGGGGTTGACTGCCTTTTTTGGTAAAGAAAGGAAAAGAAATCCTTCTATCGAATATCGAAACTCCATAAAGGATGAAGGATAAGCGTATATACACTATGTATACACAATGAAAAACTATCTCAAAAATGACAACCGAATCCGTATTTTTTTTTATGAAAAAAAAAAAAATTGTTATGAATCAATTCCAAGTTGAAAAAAGAATCGAATATTCATTGATCAAATCATTCACTCCATAGTCTGATCGATCTTTTCTTTTGAAAAACTGATTAATCGGACAAAAATAAAGATAGAGTCCCATTCTACATGTCAATATCAATACCGGCAACAATGAAATTTAAAGTAAGAGGAAAATCCGTCGACTTTAAAAATCGTGAGGGTTCAAGTCCTTCTTATTCCCCAA
>TL08
AATTCTCTGACTAGCTGCTATTGAGCCCCATCTACAAATGGATAATTCTGTCTTAGTGGAGACGAGTTTTTGAAAATAACGGAGAAATACCGACTCTCTTGCAAGAGAGTCGGTATTTCTCCGTTATTTTTTATGTTTTTCTTTAGTAGTTTTTTATTTCTATCTTTTTTTTACGGGCAGTATTTTTATGCTTTTGCTTTGATTTTGTCTGATATTTTTGTTATGGTTATGAGCTCATATTCGTTATGTACCAGTATAATAATATTAGTTATTTGTTAATCCCACTAATAAAGTTCTAATTTTATTAATTCGATTCTAATTTTCGAATTTTTTAGTTTTTTTAATATAAAATAAAAGAAAAGAGAAAGTTGTAATTTTATGCCTCTTAGATCTTCATTTCTATTTTAATCATTTCTATTTTAAATGGTAGAAATTGAAACCTTTTTATTAAAAATTTTATTAAATACAAATAAAAAAATTTTTAAATCGTGGAGGAAGGGGGGGCGGATGTAGCCAAGTGGATCAAGGCAGTGGATTGTGAATCCACCAACACGCGAGCGACTTGATGAGCTTGGTTGGAACCTACTAAGTGATAACTTTCAAATTCAGAGAAACCCTGGAATCAAAAATGGGCAATCCTGAGCCAAATCCTGTTTTACAAGAACAAACAAGGGTTCAGAAAGCGAAAAAAAAAAAGGGGGATAGGTGCAGAGACTCAACGGAAGCTGTTCTAAAAAATGGGGTTGACTGCCTTTTTTGGTAAAGAAAGGAAAAGAAATCCTTCTATCGAATATCGAAACTCCATAAAGGATGAAGGATAAGCGTATATACACTATGTATACACAATGAAAAACTATCTCAAAAATGACAACCGAATCCGTATTTTTTTTTATGAAAAAAAAAAAAATTGTTATGAATCAATTCCAAGTTGAAAAAAGAATCGAATATTCATTGATCAAATCATTCACTCCATAGTCTGATCGATCTTTTCTTTTGAAAAACTGATTAATCGGACAAAAATAAAGATAGAGTCCCATTCTACATGTCAATATCAATACCGGCAACAATGAAATTTAAAGTAAAAGGAAAATCCGTCGACTTTAAAAATCGTGAGGGTTCAAGTCCTTTTTATCCCCAA
>TL09
AATTCTCTGACTAGCTGCTATTGAGCCCCATCTACAAATGGATAATTCTGTCTTAGTGGAGACGAGTTTTTGAAAATAACGGAGAAATACCGACTCTCTTGCAAGAGAGTCGGTATTTCTCCGTTATTTTTTATGTTTTTCTTTAGTAGTTTTTTATTTCTATCTTTTTTTTACGGGCAGTATTTTTATGCTTTTGCTTTGATTTTGTCTGATATTTTTGTTATGGTTATGGGCTCATATTCGTTATGTACCAGTATAATAATATTAGTTATTTGTTAATCCCACTAATAAAGTTCTAATTTTATTAATTCGATTCTAATTTTCGAATTTTTTAGTTTTTTTAATATAAAATAAAAGAAAAGAGAAAGTTGTAATTTTATGCCTCTTAGATCTTCATTTCTATTTTAATCATTTCTATTTTAAATGGTAGAAATTGAAACCTTTTTATTAAAAATTTTATTAAATAGAAATAAAAAAATTTTTAAATCGTGGAGGAAGGGGGGGCGGATGTAGCCAAGTGGATCGAGGCAGGGGATTGTGAATCCACCATGAGCGAGCGACGCTGATGGCTTGGTATGGAACCTACTAAGTGATAACTTTCAAATTCAGAGAAACCCTGGAATCAAAAATGGGCAATCCTGAGCCAAATCCTGTTTTACAAGAACAAACAAGGGTTCAGAAAGCGAAAAAAAAAAAGGGGGATAGGTGCAGAGACTCAACGGAAGCTGTTCTAAAAAATGGGGTTGACTGCCTTTTTTGGTAAAGAAAGGAAAAGAAATCCTTCTATCGAATATCGAAACTCCATAAAGGATGAAGGATAAGCGTATATACACTATGTATACACAATGAAAAACTATCTCAAAAATGACAACCGAATCCGTATTTTTTTTTATGAAAAAAAAAAAAATTGTTATGAATCAATTCCAAGTTGAAAAAAGAATCGAATATTCATTGATCAAATCATTCACTCCATAGTCTGATCGATCTTTTCTTTTGAAAAACTGATTAATCGGACAAAAATAAAGATAGAGTCCCATTCTACATGTCAATATCAATACCGGCAACAATGAAATTTAAAGTAAGAGGAAAATCCGTCGACTTTAAAAATCGTGAGGGTTCAAGTCCCTCTTTATCCCCAA
>TL10
TCTTCTCTGACTAGCTGCTATTGAGCCCCATCTACAAATGGATAATTCTGTCTTAGTGGAGACGAGTTTTTGAAAATAACGGAGAAATACCGACTCTCTTGCAAGAGAGTCGGTATTTCTCCGTTATTTTTTATGTTTTTCTTTAGTAGTTTTTTATTTCTATCTTTTTTTTGGGGCAGTATTTTTATGCTTTTGCTTGGGAAGTGTCTGATATTTTTGTTATGGTTATGGGCTCATATTCGTTATGTACCAGTATAATAATATTAGTTATTTGTTAATCCCACTAATAAAGTTCTAATTTTATTAATTCGATTCTAATTTTCGAATTTTTTAGTTTTTTTAATATAAAATAAAAGAAAAGAGAAAGTTGTAATTTTATGCCTCTTAGATCTTCATTTCTATAGAAATCATTTCTATTTTAAATGGTAGAAATTGAAACCCTTTTATTAAATATTTTATTAACCACAAATAAAAAAATTTTTAAATCGTGGAGGAAGGGGGGGCGGATGTAGCCAAGTGGATCAATGCAGTGGATTGTGAATCCACCAACAAACGAGCGAACAGCATGAGCTTGGTATGGACCTACTTAAGTGATAACTTTCAAATTCAGAGAAACCCTGGAATCAAAAATGGGCAATCCTGAGCCAAATCCTGTTTTACAAGAACAAACAAGGGTTCAGAAAGCGAAAAAAAAAAAGGGGGATAGGTGCAGAGACTCAACGGAAGCTGTTCTAAAAAATGGGGTTGACTGCCTTTTTTGGTAAAGAAAGGAAAAGAAATCCTTCTATCGAATATCGAAACTCCATAAAGGATGAAGGATAAGCGTATATACACTATGTATACACAATGAAAAACTATCTCAAAAATGACAACCGAATCCGTATTTTTTTTTATGAAAAAAAAAAAAATTGTTATGAATCAATTCCAAGTTGAAAAAAGAATCGAATATTCATTGATCAAATCATTCACTCCATAGTCTGATCGATCTTTTCTTTTGAAAAACTGATTAATCGGACAAAAATAAAGATAGAGTCCCATTCTACATGTCAATATCAATACCGGCAACAATGAAATTTAAAGTAAGAGGAAAATCCGTCGACTTTAAAAATCGTGAGGGTTCAAGTCCCTCCTAATCCCCAA
>TL11
AGTCTTGACTAGCTGCTATTGAGCCCCATCTACAAATGGATAATTCTGTCTTAGTGGAGACGAGTTTTTGAAAATAACGGAGAAATACCGACTCTCTTGCAAGAGAGTCGGTATTTCTCCGTTATTTTTTATGTTTTTCTTTAATAGTTTTTTATTTCTATCTTTTTTTTACGGGCAGTATTTTTATGCTTTTGCTTTGGTTTGTCTGATATTTTTGTTATGGTTATGGGCTCATATTCGTTATGTACCAGTATAATAATATTAGTTATTTGTTAATCCCACTAATAAAGTTCTAATTTTATTAATTCGATTCTAATTTTCGAATTTTTTAGTTTTTTTAATATAAAATAAAAGAAAAGAGAAAGTTGTAATTTTATGCCTCTTAGATCTTCATTTCTATTTTAATCATTTCTATTTTAAATGGTAGAAATTGAAACCTTTTTATTAAAAAATTTATTAAATACAAATAAAAAAATTTTTAAATCTTGGAGGAAGGGGGGGCGGATGTAGCCAAGTGGATCAAGGCAGGGGATTGTTTATCCACCATAAAACGAGCGACTTTTGCTGAGCTGGTATGGACCTACTAAGTGATAACTTTCAAATTCAGAGAAACCCTGGAATCAAAAATGGGCAATCCTGAGCCAAATCCTGTTTTACAAGAACAAACAAGGGTTCAGAAAGCGAAAAAAAAAAAGGGGGATAGGTGCAGAGACTCAACGGAAGCTGTTCTAAAAAATGGGGTTGACTGCCTTTTTTGGTAAAGAAAGGAAAAAAAATCCTTCTATCGAATATCGAAACTCCATAAAGGATGAAGGATAAGCGTATATACACTATGTATACACAATGAAAAACTATCTCAAAAATGACAACCGAATCCGTATTTTTTTTTATGAAAAAAAAAAAAATTGTTATGAATCAATTCCAAGTTGAAAAAAGAATCGAATATTCATTGATCAAATCATTCACTCCATAGTCTGATCGATCTTTTCTTTTGAAAAACTGATTAATCGGACAAAAATAAAGATAGAGTCCCATTCTACATGTCAATATCAATACCGGCAACAATGAAATTTAAAGTAAGAGGAAAATCCGTCGACTTTAAAAATCGTGAGGGTTCAAGTCCTTTCTTATCCCCAA
>TL12
AATTCTAGACTAGCTGCTATTGAGCCCCATCTACAAATGGATAATTCTGTCTTAGTGGAGACGAGTTTTTGAAAATAACGGAGAAATACCGACTCTCTTGCAAGAGAGTCGGTATTTCTCCGTTATTTTTTATGTTTTTCTTTAGTAGTTTTTTATTTCTATCTTTTTTTTGGGGCAGTATTTTTATGCTTTTGCTTGGGTTTGTCTGATATTTTTGTTATGGTTATGGGCTCATATTCGTTATGTACCAGTATAATAATATTAGTTATTTGTTAATCCCACTAATAAAGTTCTAATTTTATTAATTCGATTCTAATTTTCGAATTTTTTAGTTTTTTTAATATAAAATAAAAGAAAAGAGAAAGTTGTAATTTTATGCCTCTTAGATCTTCATTTCTATTTAAATCATTTCTATTTTAAATGGTATAAATTGAAACCTTTTTTTTAAAAAATTTATTAAATACAAATAAAAAAATTTTTAAATCATGGAGGAAGGGGGGGCGGACGTAGCCAAGTGGGTCAAGGCAGGGGATTGTTTATCCACCAAGCACGAGGGAAATTGCATGAGCTTGGTATGGAACCTACTTAAGTGATAACTTTCAAATTCAGAAGAAACCCTGGAATCAAAAATGGGCAATCCTGAGCCAAATCCTGTTTTACAAGAACAAACAAGGGTTCAGAAAGCGAAAAAAAAAAAGGGGGATAGGTGCAGAGACTCAACGGAAGCTGTTCTAAAAAATGGGGTTGACTGCCTTTTTTGGTAAAGAAAGGAAAAGAAATCCTTCTATCGAATATCGAAACTCCATAAAGGATGAAGGATAAGCGTATATACACTATGTATACACAATGAAAAACTATCTCAAAAATGACAACCGAATCCGTATTTTTTTTTATGAAAAAAAAAAAAATTGTTATGAATCAATTCCAAGTTGAAAAAAGAATCGAATATTCATTGATCAAATCATTCACTCCATAGTCTGATCGATCTTTTCTTTTGAAAAACTGATTAATCGGACAAAAATAAAGATAGAGTCCCATTCTACATGTCAATATCAATACCGGCAACAATGAAATTTAAAGTAAGAGGAAAATCCGTCGACTTTAAAAATCGTGAGGGTTCAAGTCCCTCTTTATCCCCAA
>TL13
ATGTCTGACTAGCTGCTATTGAGCCCCATCTACAAATGGATAATTCTGTCTTAGTGGAGACGAGTTTTTGAAAATAACGGAGAAATACCGACTCTCTTGCAAGAGAGTCGGTATTTCTCCGTTATTTTTTATGTTTTTCTTTAGTAGTTTTTTATTTCTATCTTTTTTTTGGGGCAGTATTTTTATGCTTTTGCTTTGGAAGGTCTGATATTTTTGTTATGGTTATGGGCTCATATTCGTTATGTACCAGTATAATAATATTAGTTATTTGTTAATCCCACTAATAAAGTTCTAATTTTATTAATTCGATTCTAATTTTCGAATTTTTTAGTTTTTTTAATATAAAATAAAAGAAAAGAGAAAGTTGTAATTTTATGCCTCTTAGATCTTCATTTCTATTTAAATCATTTCTATTTTAAATGGTAGAAATTGAAACCTTTTTATTAAAAATTTTATTAAATACAAATAAAAAAATTTTTAAATCGTGGAGGAAGGGGGGGCGGATGTAGCCAAGTGGATCAAGGCAGGGGATTGTTTATCCACCAACACACGAGCGAATTGGCATGACTGGTTGGACCTACTTAAGTGATAACTTTCAAATTCAGAGAAACCCTGGAATCAAAAATGGGCAATCCTGAGCCAAATCCTGTTTTACAAGAACAAACAAGGGTTCAGAAAGCGAAAAAAAAAAAGGGGGATAGGTGCAGAGACTCAACGGAAGCTGTTCTAAAAAATGGGGTTGACTGCCTTTTTTGGTAAAGAAAGGAAAAGAAATCCTTCTATCGAATATCGAAACTCCATAAAGGATGAAGGATAAGCGTATATACACTATGTATACACAATGAAAAACTATCTCAAAAATGACAACCGAATCCGTATTTTTTTTTATGAAAAAAAAAAAAATTGTTATGAATCAATTCCAAGTTGAAAAAAGAATCGAATATTCATTGATCAAATCATTCACTCCATAGTCTGATCGATCTTTTCTTTTGAAAAACTGATTAATCGGACAAAAATAAAGATAGAGTCCCATTCTACATGTCAATATCAATACCGGCAACAATGAAATTTAAAGTAAGAGGAAAATCCGTCGACTTTAAAAATCGTGAGGGTTCAAGTCCCTCTTAATCCCAAA
>TL14
AATCTCTGACTAGCTGCTATTGAGCCCCATCTACAAATGGATAATTCTGTCTTAGTGGAGACGAGTTTTTGAAAATAACGGAGAAATACCGACTCTCTTGCAAGAGAGTCGGTATTTCTCCGTTATTTTTTATGTTTTTCTTTAGTAGTTTTTTATTTCTATCTTTTTTTTGGGGCAGTATTTTTATGCTTTTGCTTTGGATTGTCTGATATTTTTGTTATGGTTATGGGCTCATATTCGTTATGTACCAGTATAATAATATTAGTTATTTGTTAATCCCACTAATAAAGTTCTAATTTTATTAATTCGATTCTAATTTTCGAATTTTTTAGTTTTTTTAATATAAAATAAAAGAAAAGAGAAAGTTGTAATTTTATGCCTCTTAGATCTTCATTTCTATTTTAATCATTTCTATTTTAAATGGTAGAAATTGAAACCTTTTTATTAAATATTTTATTCAATACAAATAAAAAAATTTTTAAATCTTGGAGGAAGGGGGGGCGGATGTAGCCAAGTGGATCAAGGCAAGGGATTGTGAATCCACCAAACCCGAGCGACCCCTTGCATGACTGGTATGGACCTACTAAGTGATAACTTTCAAATTCAGAGAAACCCTGGAATCAAAAATGGGCAATCCTGAGCCAAATCCTGTTTTACAAGAACAAACAAGGGTTCAGAAAGCGAAAAAAAAAAAGGGGGATAGGTGCAGAAACTCAACGGAAGCTGTTCTAAAAAATGGGGTTGACTGCCTTTTTTGGTAAAAAAAGGAAAAAAAATCCTTCTATCGAATATCGAAACTCCATAAAGGATGAAGGATAAGCGTATATACACTATGTATACACAATGAAAAACTATCTCAAAAATGACAACCGAATCCGTATTTTTTTTTATGAAAAAAAAAAAAATTGTTATGAATCAATTCCAAGTTGAAAAAAGAATCGAATATTCATTGATCAAATCATTCACTCCATAGTCTGATCGATCTTTTCTTTTGAAAAACTGATTAATCGGACAAAAATAAAAATAGAGTCCCATTCTACATGTCAATATCAATACCGGCAACAATGAAATTTAAAGTAAGAGGAAAATCCGTCGACTTTAAAAATCGTGAGGGTTCAAGTCCTTTCTATTCCCCAA
>TL15
ATCACTGACTAGCTGCTATTGAGCCCCATCTACAAATGGATAATTCTGTCTTAGTGGAGACGAGTTTTTGAAAATAACGGAGAAATACCGACTCTCTTGCAAGAGAGTCGGTATTTCTCCGTTATTTTTTATGTTTTTCCTTAGTAGTTTTTTATTTCTATCTTTTTTTTACGGGCAGTATTTTTATGCTTTTGCTTTGGATTGTCTGATATTTTTGTTATGGTTATGGGCTCATATTCGTTATGTACCAGTATAATAATATTAGTTATTTGTTAATCCCACTAATAAAGTTCTAATTTTATTAATTCGATTCTAATTTTCGAATTTTTTAGTTTTTTTAATATAAAATAAAAGAAAAGAGAAAGTTGTAATTTTATGCCTCTTAGATCTTCATTTCTATTTTAATCATTTCTATTTTAAATGGTAGAAATTGAAACCTTTTTATTAAAAATTTTATTAAACACAAATAAAAAAATTTTTAAATCTTGGAGGAAGGGGGGGCGGACGTAGCCAAGTGGATAGTGGCGGGGGATTGTTTATCCACCAACACACGAGCGAATTTGCATGAGCTTGGTATGGACCTACTAAGTGATAACTTTCAAATTCAGAGAAACCCTGGAATCAAAAATGGGCAATCCTGAGCCAAATCCTGTTTTACAAGAACAAACAAGGGTTCAGAAAGCGAAAAAAAAAAAGGGGGATAGGTGCAGAGACTCAACGGAAGCTGTTCTAAAAAATGGGGTTGACTGCCTTTTTTGGTAAAGAAAGGAAAAAAAATCCTTCTATCGAATATCGAAACTCCATAAAGGATGAAGGATAAGCGTATATACACTATGTATACACAATGAAAAACTATCTCAAAAATGACAACCGAATCCGTATTTTTTTTTATGAAAAAAAAAAAAATTGTTATGAATCAATTCCAAGTTGAAAAAAGAATCGAATATTCATTGATCAAATCATTCACTCCATAGTCTGATCGATCTTTTCTTTTGAAAAACTGATTAATCGGACAAAAATAAAGATAGAGTCCCATTCTACATGTCAATATCAATACCGGCAACAATGAAATTTAAAGTAAGAGGAAAATCCGTCGACTTTAAAAATCGTGAGGGTTCAAGTCCTCTCTATTCCCAAA
>TL16
ATTCTCTGACTAGCTGCTATTGAGCCCCATCTACAAATGGATAATTCTGTCTTAGTGGAGACGAGTTTTTGAAAATAACGGAGAAATACCGACTCTCTTGCAAGAGAGTCGGTATTTCTCCGTTATTTTTTATGTTTTTCTTTAGTAGTTTTTTATTTCTATCTTTTTTTTACGAAAAGTATTTTTATGCTTTTGCTTTGATTTTGTCTGATATTTTTGTTATGGTTATGGGCTCATATTCGTTATGTACCAGTATAATAATATTAGTTATTTGTTAATCCCACTAATAAAGTTCTAATTTTATTAATTCGATTCTAATTTTCGAATTTTTTAGTTTTTTTAATATAAAATAAAAGAAAAGAGAAAGTTGTAATTTTATGCCTCTTAGATCTTCATTTCTATTTTAATCATTTCTATTTTAAATGGTAGAAATTGAAACCTTTTTTTTAAAAATTTTATTAAACACAAATAAAAAAATTTTTAAATCTTGGAGGAAGGGGGGGCGGATGTAGCCAAGTGGATCAAGGCAGGGGATTGTTTATCCACCAACACGCGAGCGAATATGCATGAGCTTGGTATGGAACCTACTAAGTGATAACTTTCAAATTCAGAGAAACCCTGGAATCAAAAATGGGCAATCCTGAGCCAAATCCTGTTTTACAAGAACAAACAAGGGTTCAGAAAGCGAAAAAAAAAAAGGGGGATAGGTGCAGAGACTCAACGGAAGCTGTTCTAAAAAATGGGGTTGACTGCCTTTTTTGGTAAAGAAAGGAAAAGAAATCCTTCTATCGAATATCGAAACTCCATAAAGGATGAAGGATAAGCGTATATACACTATGTATACACAATGAAAAACTATCTCAAAAATGACAACCGAATCCGTATTTTTTTTTATGAAAAAAAAAAAAATTGTTATGAATCAATTCCAAGTTGAAAAAAGAATCGAATATTCATTGATCAAATCATTCACTCCATAGTCTGATCGATCTTTTCTTTTGAAAAACTGATTAATCGGACAAAAATAAAAATAGAGTCCCATTCTACATGTCAATATCAATACCGGCAACAATGAAATTTAAAGTAAGAGGAAAATCCGTCGACTTTAAAAATCGTGAGGGTTCAAGTCCCCCTTATCCCCAA
>TL17
AATTCTCTGACTAGCTGCTATTGAGCCCCATCTACAAATGGATAATTCTGTCTTAGTGGAGACGAGTTTTTGAAAATAACGGAGAAATACCGACTCTCTTGCAAGAGAGTCGGTATTTCTCAGTTATTTTTAAAGTTTTGTTTTAACTAAGACAGAATTATCCATTTTTTTTTGGGGCTTCATTAGCAGCTAGGTCTAGAGGGAAGTTATGAACATTACTTTCATGCTTAACGGCTCATATTCGTTATGTACCAGTATAATAATATTAGTTATTTGTTAATCCCACTAATAAAGTTCTAATTTTATTAATTCGATTCTAATTTTCGAATTTTTTAGTTTTTTTAATATAAAATAAAAGAAAAGAGAAAGTTGTAATTTTATGCCTCTTAGATCTTCATTTCTATTTAAATCATTTCTATTTTAAATGGTAGAAATTGAAACCTTTTTATTAAAAAATTTATTAACCACAAATAAAAAAATTTTTTTTCGTGGAGGAAGGGGGGGGGGGCGTAGCCAAGAGGATGGATGCAGGCATTTGTTTATCCACCAACAACCGAGCGACTTTGCATGAGCTTGGTATGGAACCTACTAAGTGATAACTTTCAAATTCAGAGAAACCCTGGAATCAAAAATGGGCAATCCTGAGCCAAATCCTGTTTTACAAGAACAAACAAGGGTTCAGAAAGCGAAAAAAAAAAAGGGGGATAGGTGCAGAGACTCAACGGAAGCTGTTCTAAAAAATGGGGTTGACTGCCTTTTTTGGTAAAGAAAGGAAAAGAAATCCTTCTATCGAATATCGAAACTCCATAAAGGATGAAGGATAAGCGTATATACACTATGTATACACAATGAAAAACTATCTCAAAAATGACAACCGAATCCGTATTTTTTTTTATGAAAAAAAAAAAAATTGTTATGAATCAATTCCAAGTTGAAAAAAAAATCGAATATTCATTGATCAAATCATTCACTCCATAGTCTGATCGATCTTTTCTTTTGAAAAACTGATTAATCGGACAAAAATAAAGATAGAGTCCCATTCTACATGTCAATATCAATACCGGCAACAATGAAATTTAAAGTAAGAGGAAAATCCGTCGACTTTAAAAATCGTGAGGGTTCAAGTCCCCCTTATCCCCAA
>TL18
AATCTTGACTAGCTGCTATTGAGCCCCATCTACAAATGGATAATTCTGTCTTAGTGGAGACGAGTTTTTGAAAATAACGGAGAAATACCGACTCTCTTGCAAGAGAGTCGGTATTTCTCCGTTATTTTTTATGTTTTTCTTTAGTAGTTTTTTATTTCTATCTTTTTTTTACGGGAAGTATTTTTATGCTTTTGCTTTGATTTTGTCTGATATTTTTGTTATGGTTATGGGCTCATATTCGTTATGTACCAGTATAATAATATTAGTTATTTGTTAATCCCACTAATAAAGTTCTAATTTTATTAATTCGATTCTAATTTTCGAATTTTTTAGTTTTTTTAATATAAAATAAAAGAAAAGAGAAAGTTGTAATTTTATGCCTCTTAGATCTTCATTTCTATTTTAATCATTTCTATTTTAAATGGTAGAAATTGAAACCTTTTTATTAAATATTTTATTAAACACAAATAAAAAAATTTTTAAATCGTGGAGGAAGGGGGGGCGGATGTAGCCAAGTGGATCAAGGCAAGGGATTGTGAATCCACCAACAAGCGAGGAAGAATGGCATGAGCTTGGTATGGACCTACTAAGTGATAACTTTCAAATTCAGAGAAACCCTGGAATCAAAAATGGGCAATCCTGAGCCAAATCCTGTTTTACAAGAACAAACAAGGGTTCAGAAAGCGAAAAAAAAAAAGGGGGATAGGTGCAGAGACTCAACGGAAGCTGTTCTAAAAAATGGGGTTGACTGCCTTTTTTGGTAAAGAAAGGAAAAAAAATCCTTCTATCGAATATCGAAACTCCATAAAGGATGAAGGATAAGCGTATATACACTATGTATACACAATGAAAAACTATCTCAAAAATGACAACCGAATCCGTATTTTTTTTTATGAAAAAAAAAAAAATTGTTATGAATCAATTCCAAGTTGAAAAAAGAATCGAATATTCATTGATCAAATCATTCACTCCATAGTCTGATCGATCTTTTCTTTTGAAAAACTGATTAATCGGACAAAAATAAAGATAGAGTCCCATTCTACATGTCAATATCAATACCGGCAACAATGAAATTTAAAGTAAAAGGAAAATCCGTCGACTTTAAAAATCGTGAGGGTTCAAGTCCCTCTTATTCCCCAA
>TL19
ATCTCTGACTAGCTGCTATTGAGCCCCATCTACAAATGGATAATTCTGTCTTAGTGGAGACGAGTTTTTGAAAATAACGGAGAAATACCGACTCTCTTGCAAGAGAGTCGGTATTTCTCCGTTATTTTTTATGTTTTTCTTTAGTAGTTTTTTATTTCTATCTTTTTTTTACGGGAAGTATTTTTATGCTTTTGCTTTGATTTTGTCTGATATTTTTGTTATGGTTATGGGCTCATATTCGTTATGTACCAGTATAATAATATTAGTTATTTGTTAATCCCACTAATAAAGTTCTAATTTTATTAATTCGATTCTAATTTTCGAATTTTTTAGTTTTTTTAATATAAAATAAAAGAAAAGAGAAAGTTGTAATTTTATGCCTCTTAGATCTTCATTTCTATTTTAATCATTTCTATTTTAAATGGTAGAAATTGAAACCTTTTTATTAAATATTTTATTAAATAGAAATAAAAAAATTTTTAAATCGTGGAGGAAGGGGGGGCGGATGTAGCCAAGTGGATCAAGGCAGTGGATTGTGAATCCACCAACACGCGAGCGACCATGCATGAGCTTGGTATGGAACCTACTAAGTGATAACTTTCAAATTCAGAGAAACCCTGGAATCAAAAATGGGCAATCCTGAGCCAAATCCTGTTTTACAAGAACAAACAAGGGTTCAGAAAGCGAAAAAAAAAAAGGGGGATAGGTGCAGAAACTCAACGGAAGCTGTTCTAAAAAATGGGGTTGACTGCCTTTTTTGGTAAAGAAAGGAAAAGAAATCCTTCTATCGAATATCGAAACTCCATAAAGGATGAAGGATAAGCGTATATACACTATGTATACACAATGAAAAACTATCTCAAAAATGACAACCGAATCCGTATTTTTTTTTATGAAAAAAAAAAAAATTGTTATGAATCAATTCCAAGTTGAAAAAAGAATCGAATATTCATTGATCAAATCATTCACTCCATAGTCTGATCGATCTTTTCTTTTGAAAAACTGATTAATCGGACAAAAATAAAGATAGAGTCCCATTCTACATGTCAATATCAATACCGGCAACAATGAAATTTAAAGTAAAAGGAAAATCCGTCGACTTTAAAAATCGTGAGGGTTCAAGTCCCTCTTTTCCCCAA
>TL20
AATCTCTGACTAGCTGCTATTGAGCCCCATCTACAAATGGATAATTCTGTCTTAGTGGAGACGAGTTTTTGAAAATAACGGAGAAATACCGACTCTCTTGCAAGAGAGTCGGTATTTCTCCGTTATTTTTTATGTTTTTCTTTAGTAGTTTTTTATTTCTATCTTTTTTTTGGGGCAGTATTTTTAGCCTTTTGCTTTGGTTTGTCTGATATTTTTGTTATGGTTATGGGCTCATATTCGTTATGTACCAGTATAATAATATTAGTTATTTGTTAATCCCACTAATAAAGTTCTAATTTTATTAATTCGATTCTAATTTTCGAATTTTTTAGTTTTTTTAATATAAAATAAAAGAAAAGAGAAAGTTGTAATTTTATGCCTCTTAGATCTTCATTTCTATTTAAATAATTTCTATTTTAAATGGTAGAAATTGAAACCTTTTTATTAAAAAATTTATTAACCACAAATAAAAAAATTTCCATTTCGTGGAGGAAGGGGGGGCGGATGTAGCCTAGTGGGTCGATGCAGGCGATTGTTTATCCACCAACACACGAGCGAACTTTGGCTTGAGCTTGGTATGGAACCTACTAAGTGATAACTTTCAAATTCAGAGAAACCCTGGAATCAAAAATGGGCAATCCTGAGCCAAATCCTGTTTTACAAGAACAAACAAGGGTTCAGAAAGCGAAAAAAAAAAAGGGGGATAGGTGCAGAGACTCAACGGAAGCTGTTCTAAAAAATGGGGTTGACTGCCTTTTTTGGTAAAAAAAGGAAAAAAAATCCTTCTATCGAATATCGAAACTCCATAAAGGATGAAGGATAAGCGTATATACACTATGTATACACAATGAAAAACTATCTCAAAAATGACAACCGAATCCGTATTTTTTTTTATGAAAAAAAAAAAAATTGTTATGAATCAATTCCAAGTTGAAAAAAGAATCGAATATTCATTGATCAAATCATTCACTCCATAGTCTGATCGATCTTTTCTTTTGAAAAACTGATTAATCGGACAAAAATAAAGATAGAGTCCCATTCTACATGTCAATATCAATACCGGCAACAATGAAATTTAAAGTAAGAGGAAAATCCGTCGACTTTAAAAATCGTGAGGGTTCAGGTCCTTCCTATTCCCCA
>TL21
AATTTCTCTGACTAGCTGCTATTGAAGCCCCATCTACAAATGGATAATTCTGTCTTAGTGGAGACGAGTTTTTGAAAATAACGGAGAAATACCGACTCTCTTGCAAGAGAGTCGGTATTTCTCAGTTATTTTTTATGTTTTTCTTTAGTAGTTTTTTATTTCTATCTTTTTTTTACGAAAAGTATTTTTATGCTTTTGCTTTGGTTTGTCTGATATTTTTGTTATGGTTATGGGCTCATATTCGTTATGTACCAGTATAATAATATTAGTTATTTGTTAATCCCACTAATAAAGTTCTAATTTTATTAATTCGATTCTAATTTTCGAATTTTTTAGTTTTTTTAATATAAAATAAAAGAAAAGAGAAAGTTGTAATTTTATGCCTCTTAGATCTTCATTTCTATTTAAATCATTTCTATTTTAAATGGTAGAAATTGAAACCTTTTTATTAAATATTTTATTAAATACAAATAAAAAAATTTTTAAATCGTGGAGGAAGGGGGGGCGGATGTAGCCAAGTGGATCAAGGCAGGGGATTGTGAATCCACCAACAACCGAGCGAATTTGCATGAGCTGGTATGGACCTACTTAAGTGATAACTTTCAAATTCAGAGAAACCCTGGAATCAAAAATGGGCAATCCTGAGCCAAATCCTGTTTTACAAGAACAAACAAGGGTTCAGAAAGCGAAAAAAAAAAAGGGGGATAGGTGCAGAGACTCAACGGAAGCTGTTCTAAAAAATGGGGTTGACTGCCTTTTTTGGTAAAGAAAGGAAAAGAAATCCTTCTATCGAATATCGAAACTCCATAAAGGATGAAGGATAAGCGTATATACACTATGTATACACAATGAAAAACTATCTCAAAAATGACAACCGAATCCGTATTTTTTTTTATGAAAAAAAAAAAAATTGTTATGAATCAATTCCAAGTTGAAAAAAGAATCGAATATTCATTGATCAAATCATTCACTCCATAGTCTGATCGATCTTTTCTTTTGAAAAACTGATTAATCGGACAAAAATAAAGATAGAGTCCCATTCTACATGTCAATATCAATACCGGCAACAATGAAATTTAAAGTAAAAGGAAAATCCGTCGACTTTAAAAATCGTGAGGGTTCAAGTCCTCTTTACCCCCAA
>TL22
ATCTCTGACTAGCTGCTATTGAGCCCCATCTACAAATGGATAATTCTGTCTTAGTGGAGACGAGTTTTTGAAAATAACGGAGAAATACCGACTCTCTTGCAAGAGAGTCGGTATTTCTCCGTTATTTTTTATGTTTTTCTTTAGTAGTTTTTTATTTCTATCTTTTTTTTACGGGCAGTATTTTTATGCTTTTGCTTTGGATTGTCTGATATTTTTGTTATGGTTATGGGCTCATATTCGTTATGTACCAGTATAATAATATTAGTTATTTGTTAATCCCACTAATAAAGTTCTAATTTTATTAATTCGATTCTAATTTTCGAATTTTTTAGTTTTTTTAATATAAAATAAAAGAAAAGAGAAAGTTGTAATTTTATGCCTCTTAGATCTTCATTTCTATTTTAATCATTTCTATTTTAAATGGTAGAAATTGAAACCTTTTTTTTAAAAATTTTATTAAATACAAATAAAAAAATTTTTAAATCTTGGAGGAAGGGGGGGCGGATGTAGCCAAGTGGATCATGGCAGTGGATTGTTTATCCACCAACAAGCGAGCGACCCATTGCATGAGCTTGGTATGGACCTACTAAGTGATAACTTTCAAATTCAGAGAAACCCTGGAATCAAAAATGGGCAATCCTGAGCCAAATCCTGTTTTACAAGAACAAACAAGGGTTCAGAAAGCGAAAAAAAAAAAGGGGGATAGGTGCAGAGACTCAACGGAAGCTGTTCTAAAAAATGGGGTTGACTGCCTTTTTTGGTAAAGAAAGGAAAAGAAATCCTTCTATCGAATATCGAAACTCCATAAAGGATGAAGGATAAGCGTATATACACTATGTATACACAATGAAAAACTATCTCAAAAATGACAACCGAATCCGTATTTTTTTTTATGAAAAAAAAAAAAATTGTTATGAATCAATTCCAAGTTGAAAAAAGAATCGAATATTCATTGATCAAATCATTCACTCCATAGTCTGATCGATCTTTTCTTTTGAAAAACTGATTAATCGGACAAAAATAAAGATAGAGTCCCATTCTACATGTCAATATCAATACCGGCAACAATGAAATTTAAAGTAAGAGGAAAATCCGTCGACTTTAAAAATCGTGAGGGTTCAAGTCCCCCTTATCCCCAA
>TL23
ATCTTGACTAGCTGCTATTGAGCCCCATCTACAAATGGATAATTCTGTCTTAGTGGAGACGAGTTTTTGAAAATAACGGAGAAATACCGACTCTCTTGCAAGAGAGTCGGTATTTCTCCGTTATTTTTTATGTTTTTCTTTAGTAGTTTTTTATTTCTATCTTTTTTTTACGAAAAGTATTTTTATGCTTTTGCTTTGATTTTGTCTGATATTTTTGTTATGGTTATGAGCTCATATTCGTTATGTACCAGTATAATAATATTAGTTATTTGTTAATCCCACTAATAAAGTTCTAATTTTATTAATTCGATTCTAATTTTCGAATTTTTTAGTTTTTTTAATATAAAATAAAAGAAAAGAGAAAGTTGTAATTTTATGCCTCTTAGATCTTCATTTCTATTTTAATCATTTCTATTTTAAATGGTAGAAATTGAAACCTTTTTATTAAATATTTTATTAAATACAAATAAAAAAATTTTTAAATCGTGGAGGAAGGGGGGGCGGATGTAGCCAAGTGGATCAAGGCAGTGGATTGTGAATCCACCAACAACCGAGCGAAGCTATCATGAGCTTGGTTGGAACCTACTTAAGTGATAACTTTCAAATTCAGAAGAAACCCTGGAATCAAAAATGGGCAATCCTGAGCCAAATCCTGTTTTACAAGAACAAACAAGGGTTCAGAAAGCGAAAAAAAAAAAGGGGGATAGGTGCAGAGACTCAACGGAAGCTGTTCTAAAAAATGGGGTTGACTGCCTTTTTTGGTAAAAAAAGGAAAAAAAATCCTTCTATCGAATATCGAAACTCCATAAAGGATGAAGGATAAGCGTATATACACTATGTATACACAATGAAAAACTATCTCAAAAATGACAACCGAATCCGTATTTTTTTTTATGAAAAAAAAAAAAATTGTTATGAATCAATTCCAAGTTGAAAAAAGAATCGAATATTCATTGATCAAATCATTCACTCCATAGTCTGATCGATCTTTTCTTTTGAAAAACTGATTAATCGGACAAAAATAAAGATAGAGTCCCATTCTACATGTCAATATCAATACCGGCAACAATGAAATTTAAAGTAAGAGGAAAATCCGTCGACTTTAAAAATCGTGAGGGTTCAAGTCCCTCTTATTCCCCAA
>TL24
ATTTCTCTGACTAGCTGCTATTGAGCCCCATCTACAAATGGATAATTCTGTCTTAGTGGAGACGAGTTTTTGAAAATAACGGAGAAATACCGACTCTCTTGCAAGAGAGTCGGTATTTCTCCGTTATTTTTTATGTTTTTCTTTAGTAGTTTTTTATTTCTATCTTTTTTTTACGAAAAGTATTTTTATGCTTTTGCTTTGATTTTGTCTGATATTTTTGTTATGGTTATGGGCTCATATTCGTTATGTACCAGTATAATAATATTAGTTATTTGTTAATCCCACTAATAAAGTTCTAATTTTATTAATTCGATTCTAATTTTCGAATTTTTTAGTTTTTTTAATATAAAATAAAAGAAAAGAGAAAGTTGTAATTTTATGCCTCTTAGATCTTCATTTCTATTTTAATCATTTCTATTTTAAATGGTAGAAATTGAAACCTTTTTATTAAAAATTTTATTAAATACAAATAAAAAAATTTTTAAATCTTGGAGGAAGGGGGGGCGGATGTAGCCAAGTGGATCAAGGCAGTGGATTGTGAATCCACCAACAAGCGAGAGAATCATGCATGACTTGGTTGGAACCTACTAAGTGATAACTTTCAAATTCAGAGAAACCCTGGAATCAAAAATGGGCAATCCTGAGCCAAATCCTGTTTTACAAGAACAAACAAGGGTTCAGAAAGCGAAAAAAAAAAAGGGGGATAGGTGCAGAGACTCAACGGAAGCTGTTCTAAAAAATGGGGTTGACTGCCTTTTTTGGTAAAGAAAGGAAAAAAAATCCTTCTATCGAATATCGAAACTCCATAAAGGATGAAGGATAAGCGTATATACACTATGTATACACAATGAAAAACTATCTCAAAAATGACAACCGAATCCGTATTTTTTTTTATGAAAAAAAAAAAAATTGTTATGAATCAATTCCAAGTTGAAAAAAGAATCGAATATTCATTGATCAAATCATTCACTCCATAGTCTGATCGATCTTTTCTTTTGAAAAACTGATTAATCGGACAAAAATAAAGATAGAGTCCCATTCTACATGTCAATATCAATACCGGCAACAATGAAATTTAAAGTAAGAGGAAAATCCGTCGACTTTAAAAATCGTGAGGGTTCAAGTCCCTTCTATCCCCAA
>TL25
ATCATCTGACTAGCTGCTATTGAGCCCCATCTACAAATGGATAATTCTGTCTTAGTGGAGACGAGTTTTTGAAAATAACGGAGAAATACCGACTCTCTTGCAAGAGAGTCGGTATTTCTCCGTTATTTTTTATGTTTTTCTTTAGTAGTTTTTTATTTCTATCTTTTTTTTACGAAAAGTATTTTTATGCTTTTGCTTTGATTTTGTCTGATATTTTTGTTATGGTTATGGGCTCATATTCGTTATGTACCAGTATAATAATATTAGTTATTTGTTAATCCCACTAATAAAGTTCTAATTTTATTAATTCGATTCTAATTTTCGAATTTTTTAGTTTTTTTAATATAAAATAAAAGAAAAGAGAAAGTTGTAATTTTATGCCTCTTAGATCTTCATTTCTATTTTAATCATTTCTATTTTAAATGGTAGAAATTGAAACCTTTTTATTAAAAATTTTATTAAATAGAAATAAAAAAATTTTTAAATCGTGGAGGAAGGGGGGGCGGATGTAGCCAAGTGGATCAAGGCAGTGGATTGTGAATCCACCAAGAGCGAGAGAATTTGCATGAGCTTGGTATGGACCTACTAAGTGATAACTTTCAAATTCAGAGAAACCCTGGAATCAAAAATGGGCAATCCTGAGCCAAATCCTGTTTTACAAGAACAAACAAGGGTTCAGAAAGCGAAAAAAAAAAAGGGGGATAGGTGCAGAGACTCAACGGAAGCTGTTCTAAAAAATGGGGTTGACTGCCTTTTTTGGTAAAGAAAGGAAAAGAAATCCTTCTATCGAATATCGAAACTCCATAAAGGATGAAGGATAAGCGTATATACACTATGTATACACAATGAAAAACTATCTCAAAAATGACAACCGAATCCGTATTTTTTTTTATGAAAAAAAAAAAAATTGTTATGAATCAATTCCAAGTTGAAAAAAGAATCGAATATTCATTGATCAAATCATTCACTCCATAGTCTGATCGATCTTTTCTTTTGAAAAACTGATTAATCGGACAAAAATAAAGATAGAGTCCCATTCTACATGTCAATATCAATACCGGCAACAATGAAATTTAAAGTAAGAGGAAAATCCGTCGACTTTAAAAATCGTGAGGGTTCAAGTCTCCTTTACCCCCAA
>TL26
ATCACTGACTAGCTGCTATTGAGCCCCATCTACAAATGGATAATTCTGTCTTAGTGGAGACGAGTTTTTGAAAATAACGGAGAAATACCGACTCTCTTGCAAGAGAGTCGGTATTTCTCCGTTATTTTTTATGTTTTTCTTTAGTAGTTTTTTATTTCTATCTTTTTTTTACGAAAAGTATTTTTATGCTTTTGCTTTTATTTTGTCTGATATTTTTGTTATGGTTATGAGCTCATATTCGTTATGTACCAGTATAATAATATTAGTTATTTGTTAATCCCACTAATAAAGTTCTAATTTTATTAATTCTATTCTAATTTTCGAATTTTTTAGTTTTTTTAATATAAAATAAAAGAAAAGAGAAAGTTGTAATTTTATGCCCCTTAGATCTTCATTTCTATTTTAATCATTTCTATTTTAAATGGGAGAAATTGAAACCCTTTTATTAAAAATTTTATTAAATAGAAATAAAAAAATTTTTAAATCGTGGAGGAAGGGGGGGCGGATGTGGCCAAGTGGATCAAGGCAGTGGATTGTGAATCCACCACGCGCGAGCGACATGCATGAGCTTGGTTGGAACCTTACTTAAGTGATAACTTTCAAATTCAGAAGAAACCCTGGAATCAAAAATGGGCAATCCTGAGCCAAATCCTGTTTTACAAGAACAAACAAGGGTTCAGAAAGCGAAAAAAAAAAAGGGGGATAGGTGCAGAGACTCAACGGAAGCTGTTCTAAAAAATGGGGTTGACTGCCTTTTTTGGTAAAGAAAGGAAAAAAAATCCTTCTATCGAATATCGAAACTCCATAAAGGATGAAGGATAAGCGTATATACACTATGTATACACAATGAAAAACTATCTCAAAAATGACAACCGAATCCGTATTTTTTTTTATGAAAAAAAAAAAAATTGTTATGAATCAATTCCAAGTTGAAAAAAGAATCGAATATTCATTGATCAAATCATTCACTCCATAGTCTGATCGATCTTTTCTTTTGAAAAACTGATTAATCGGACAAAAATAAAGATAGAGTCCCATTCTACATGTCAATATCAATACCGGCAACAATGAAATTTAAAGTAAGAGGAAAATCCGTCGACTTTAAAAATCGTGAGGGTTCAAGTCCTTTTTATTCCCCAAA
>CH01
ATTCCCTGACTAGCTGCTATTGAGCCCCATCTACAAATGGATAATTCTGTCTTAGTGGAGACGAGTTTTTGAAAATAACGGAGAAATACCGACTCTCTTGCAAGAGAGTCGGTATTTCTCCGTTATTTTTTATGTTTTTCCTTAGTAGTTTTTTATTTCTATCTTTTTTTTACGGGCAGTATTTTTATGCTTTTGCTTGGATTTTGTCTGATATTTTTGTTATGGTTATGGGCTCATATTCGTTATGTACCAGTATAATAATATTAGTTATTTGTTAATCCCACTAATAAAGTTCTAATTTTATTAATTCGATTCTAATTTTCGAATTTTTTAGTTTTTTTAATATAAAATAAAAGAAAAGAGAAAGTTGTAATTTTATGCCTCTTAGATCTTCATTTCTATTTTAATAATTTCTATTTTAAATGGTGTAAATTGAAACCTTTTTATTAAAAAATTTATTAAACACAAATAAAAAAATTTTTAAATCGTGGAGGAAGGGGGGGCGGATGTAGCCAAGTGGATCAAGGCAGGGGATTGTTTATCCACCAAAAAGCGAGCGATTGGCTTGAGCTTGGTATGGAACCTACTAAGTGATAACTTTCAAATTCAGAGAAACCCTGGAATCAAAAATGGGCAATCCTGAGCCAAATCCTGTTTTACAAGAACAAACAAGGGTTCAGAAAGCGAAAAAAAAAAAGGGGGATAGGTGCAGAGACTCAACGGAAGCTGTTCTAAAAAATGGGGTTGACTGCCTTTTTTGGTAAAAAAAGGAAAAAAAATCCTTCTATCGAATATCGAAACTCCATAAAGGATGAAGGATAAGCGTATATACACTATGTATACACAATGAAAAACTATCTCAAAAATGACAACCGAATCCGTATTTTTTTTTATGAAAAAAAAAAAAATTGTTATGAATCAATTCCAAGTTGAAAAAAAAATCGAATATTCATTGATCAAATCATTCACTCCATAGTCTGATCGATCTTTTCTTTTGAAAAACTGATTAATCGGACAAAAATAAAGATAGAGTCCCATTCTACATGTCAATATCAATACCGGCAACAATGAAATTTAAAGTAAAAGGAAAATCCGTCGACTTTAAAAATCGTGAGGGTTCAAGTCCCTCTTTATCCCCAA
>CH02
TCTCTGACTAGCTGCTATTGAGCCCCATCTACAAATGGATAATTCTGTCTTAGTGGAGACGAGTTTTTGAAAATAACGGAGAAATACCGACTCTCTTGCAAGAGAGTCGGTATTTCTCCGTTATTTTTTATGTTTTTCTTTAGTAGTTTTTTATTTCTATCTTTTTTTTGGGGCAGTATTTTTATGCTTTTGCTTTGGTTTGTCTGATATTTTTGTTATGGTTATGGGCTCATATTCGTTATGTACCAGTATAATAATATTAGTTATTTGTTAATCCCACTAATAAAGTTCTAATTTTATTAATTCGATTCTAATTTTCGAATTTTTTAGTTTTTTTAATATAAAATAAAAGAAAAGAGAAAGTTGTAATTTTATGCCTCTTAGATCTTCATTTCTATTTTAATCATTTCTATTTTAAATGGTAGAAATTGAAACCTTTTTATTAAATATTTTATTAAATAGAAATAAAAAAATTTTTAAATCGTGGAGGAAGGGGGGGCGGATGTAGCCAAGTGGATCATGGCAGTGGATTGTTAATCCACCAACAAGCGAGCGAACCCTTGGCATGAGCTTGGTATGGACCTACTAAGTGATAACTTTCAAATTCAGAGAAACCCTGGAATCAAAAATGGGCAATCCTGAGCCAAATCCTGTTTTACAAGAACAAACAAGGGTTCAGAAAGCGAAAAAAAAAAAGGGGGATAGGTGCAGAGACTCAACGGAAGCTGTTCTAAAAAATGGGGTTGACTGCCTTTTTTGGTAAAAAAAGGAAAAAAAATCCTTCTATCGAATATCGAAACTCCATAAAGGATGAAGGATAAGCGTATATACACTATGTATACACAATGAAAAACTATCTCAAAAATGACAACCGAATCCGTATTTTTTTTTATGAAAAAAAAAAAAATTGTTATGAATCAATTCCAAGTTGAAAAAAGAATCGAATATTCATTGATCAAATCATTCACTCCATAGTCTGATCGATCTTTTCTTTTGAAAAACTGATTAATCGGACAAAAATAAAGATAGAGTCCCATTCTACATGTCAATATCAATACCGGCAACAATGAAATTTAAAGTAAAAGGAAAATCCGTCGACTTTAAAAATCGTGAGGGTTCAAGTCCCCCTTTACCCCCAA
>CH03
AATTCCTCTGACTAGCTGCTATTGAGCCCCATCTACAAATGGATAATTCTGTCTTAGTGGAGACGAGTTTTTGAAAATAACGGAGAAATACCGACTCTCTTGCAAGAGAGTCGGTATTTCTCCGTTATTTTTTATGTTTTTCTTCCACAGTTTTTTATTTCTATCTTTTTTTTGGGGCAGTATTTTTATGCTTTTGCTTGGGAAGTGTCTGATATTTTTGTTATGGTTATGGGCTCATATTCGTTATGTACCAGTATAATAATATTAGTTATTTGTTAATCCCACTAATAAAGTTCTAATTTTATTAATTCGATTCTAATTTTCGAATTTTTTAGTTTTTTTAATATAAAATAAAAGAAAAGAGAAAGTTGTAATTTTATGCCTCTTAGATCTTCATTTCTATTTAAATCATTTCTATTTTAAATGGTAGAAATTGAAACCTTTTTATTAAAAATTTTATTCAATACAAATAAAAAAATTTTTATTTCGTGGAGGAAGGGGGGGCGGATGTAGCCAAGTGGATCAAGGCAGGGGATTGTTTATCCACCAACAACCGAGCGATATGCTGAGCTTGGTATGGACCTACTAAGTGATAACTTTCAAATTCAGAGAAACCCTGGAATCAAAAATGGGCAATCCTGAGCCAAATCCTGTTTTACAAGAACAAACAAGGGTTCAGAAAGCGAAAAAAAAAAAGGGGGATAGGTGCAGAGACTCAACGGAAGCTGTTCTAAAAAATGGGGTTGACTGCCTTTTTTGGTAAAAAAAGGAAAAAAAATCCTTCTATCGAATATCGAAACTCCATAAAGGATGAAGGATAAGCGTATATACACTATGTATACACAATGAAAAACTATCTCAAAAATGACAACCGAATCCGTATTTTTTTTTATGAAAAAAAAAAAAATTGTTATGAATCAATTCCAAGTTGAAAAAAGAATCGAATATTCATTGATCAAATCATTCACTCCATAGTCTGATCGATCTTTTCTTTTGAAAAACTGATTAATCGGACAAAAATAAAGATAGAGTCCCATTCTACATGTCAATATCAATACCGGCAACAATGAAATTTAAAGTAAAAGGAAAATCCGTCGACTTTAAAAATCGTGAGGGTTCAAGTCCCTCTTTTTCCCCAAGA
>CH04
ATCTCTGACTAGCTGCTATTGAGCCCCATCTACAAATGGATAATTCTGTCTTAGTGGAGACGAGTTTTTGAAAATAACGGAGAAATACCGACTCTCTTGCAAGAGAGTCGGTATTTCTCCGTTATTTTTTATGTTTTTCCTTAGTAGTTTTTTATTTCTATCTTTTTTTTACGGGCAGTATTTTTATGCTTTTGCTTTGATTTTGTCTGATATTTTTGTTATGGTTATGGGCTCATATTCGTTATGTACCAGTATAATAATATTAGTTATTTGTTAATCCCACTAATAAAGTTCTAATTTTATTAATTCGATTCTAATTTTCGAATTTTTTAGTTTTTTTAATATAAAATAAAAGAAAAGAGAAAGTTGTAATTTTATGCCTCTTAGATCTTCATTTCTATTTAAATCATTTCTATTTTAAATGGTAGAAATTGAAACCTTTTTTTTAAAAAATTTATTAAATACAAATAAAAAAATTTTTAAATCGTGGAGGAAGGGGGGGCGGACGTAGCCAAGTGGATAGAGGCGAGGGATTGTTTATCCACCAACAAGCGAGCGATATGGCATGAGCTTGGTTGGAACCTACTAAGTGATAACTTTCAAATTCAGAGAAACCCTGGAATCAAAAATGGGCAATCCTGAGCCAAATCCTGTTTTACAAGAACAAACAAGGGTTCAGAAAGCGAAAAAAAAAAAGGGGGATAGGTGCAGAGACTCAACGGAAGCTGTTCTAAAAAATGGGGTTGACTGCCTTTTTTGGTAAAGAAAGGAAAAAAAATCCTTCTATCGAATATCGAAACTCCATAAAGGATGAAGGATAAGCGTATATACACTATGTATACACAATGAAAAACTATCTCAAAAATGACAACCGAATCCGTATTTTTTTTTATGAAAAAAAAAAAAATTGTTATGAATCAATTCCAAGTTGAAAAAAAAATCGAATATTCATTGATCAAATCATTCACTCCATAGTCTGATCGATCTTTTCTTTTGAAAAACTGATTAATCGGACAAAAATAAAGATAGAGTCCCATTCTACATGTCAATATCAATACCGGCAACAATGAAATTTAAAGTAAGAGGAAAATCCGTCGACTTTAAAAATCGTGAGGGTTCAAGTCCTTCTTATCCCCCAA
>CH05
CTTGACTAGCTGCTATTGAAGCCCCATCTACAAATGGATAATTCTGTCTTAGTGGAGACGAGTTTTTGAAAATAACGGAGAAATACCGACTCTCTTGCAAGAGAGTCGGTATTTCTCCGTTATTTTTTATGTTTTTCCTCAACAGTTTTTTATTTCTATCTTTTTTTTGGGGCATTATTTTTATGCTTTTGCTTTGGTTTGTCTGATATTTTTGTTATGGTTATGGGCTCATATTCGTTATGTACCAGTATAATAATATTAGTTATTTGTTAATCCCACTAATAAAGTTCTAATTTTATTAATTCGATTCTAATTTTCGAATTTTTTAGTTTTTTTAATATAAAATAAAAGAAAAGAGAAAGTTGTAATTTTATGCCTCTTAGATCTTCATTTCTATTTAAATCATTTCTATTTTAAATGGTAGAAATTGAAACCTTTTTATTAAAAATTTTATTAAACACAAATAAAAAAATTTTTAAATCGTGGAGGAAGGGGGGGCGGATGTAGCCAAGTGGATCAAGGCAAGGGATTGTTTATCCACCACACGCGAGGGAGTATGCATGAGCTTGGTATGGAACCTACTAAGTGATAACTTTCAAATTCAGAGAAACCCTGGAATCAAAAATGGGCAATCCTGAGCCAAATCCTGTTTTACAAGAACAAACAAGGGTTCAGAAAGCGAAAAAAAAAAAGGGGGATAGGTGCAGAGACTCAACGGAAGCTGTTCTAAAAAATGGGGTTGACTGCCTTTTTTGGTAAAAAAAGGAAAAAAAATCCTTCTATCGAATATCGAAACTCCATAAAGGATGAAGGATAAGCGTATATACACTATGTATACACAATGAAAAACTATCTCAAAAATGACAACCGAATCCGTATTTTTTTTTATGAAAAAAAAAAAAATTGTTATGAATCAATTCCAAGTTGAAAAAAGAATCGAATATTCATTGATCAAATCATTCACTCCATAGTCTGATCGATCTTTTCTTTTGAAAAACTGATTAATCGGACAAAAATAAAGATAGAGTCCCATTCTACATGTCAATATCAATACCGGCAACAATGAAATTTAAAGTAAGAGGAAAATCCGTCGACTTTAAAAATCGTGAGGGTTCAAGTCCTTTCTATTCCCCAA
>CH06
ATCTCTGACTAGCTGCTATTGAGCCCCATCTACAAATGGATAATTCTGTCTTAGTGGAGACGAGTTTTTGAAAATAACGGAGAAATACCGACTCTCTTGCAAGAGAGTCGGTATTTCTCCGTTATTTTTTATGTTTTTCTTTAGTAGTTTTTTATTTCTATCTTTTTTTTACGAAAAGTATTTTTATGCTTTTGCTTTGATTTTGTCTGATATTTTTGTTATGGTTATGGGCTCATATTCGTTATGTACCAGTATAATAATATTAGTTATTTGTTAATCCCACTAATAAAGTTCTAATTTTATTAATTCGATTCTAATTTTCGAATTTTTTAGTTTTTTTAATATAAAATAAAAGAAAAGAGAAAGTTGTAATTTTATGCCTCTTAGATCTTCATTTCTATTTTAATCATTTCTATTTTAAATGGTAGAAATTGAAACCTTTTTATTAAAAATTTTATTAAATACAAATAAAAAAATTTTTAAATCGTGGAGGAAGGGGGGGCGGATGTAGCCAAGTGGATCAAGGCAGTGGATTGTGAATCCACCAACACACGAAGACTTTGGCATGACTTGGTATGGACCTACTTAAGTGATAACTTTCAAATTCAGAGAAACCCTGGAATCAAAAATGGGCAATCCTGAGCCAAATCCTGTTTTACAAGAACAAACAAGGGTTCAGAAAGCGAAAAAAAAAAAGGGGGATAGGTGCAGAGACTCAACGGAAGCTGTTCTAAAAAATGGGGTTGACTGCCTTTTTTGGTAAAAAAAGGAAAAAAAATCCTTCTATCGAATATCGAAACTCCATAAAGGATGAAGGATAAGCGTATATACACTATGTATACACAATGAAAAACTATCTCAAAAATGACAACCGAATCCGTATTTTTTTTTATGAAAAAAAAAAAAATTGTTATGAATCAATTCCAAGTTGAAAAAAGAATCGAATATTCATTGATCAAATCATTCACTCCATAGTCTGATCGATCTTTTCTTTTGAAAAACTGATTAATCGGACAAAAATAAAGATAGAGTCCCATTCTACATGTCAATATCAATACCGGCAACAATGAAATTTAAAGTAAGAGGAAAATCCGTCGACTTTAAAAATCGTGAGGGTTCAAGTCCCTCTTATTCCCCAA
>CH07
ATCTTGACTAGCTGCTATTGAGCCCCATCTACAAATGGATAATTCTGTCTTAGTGGAGACGAGTTTTTGAAAATAACGGAGAAATACCGACTCTCTTGCAAGAGAGTCGGTATTTCTCCGTTATTTTTTATGTTTTTCTTTAGTAGTTTTTTATTTCTATCTTTTTTTTACGAAAAGTATTTTTATGCTTTTGCTTTGATTTTGTCTGATATTTTTGTTATGGTTATGGGCTCATATTCGTTATGTACCAGTATAATAATATTAGTTATTTGTTAATCCCACTAATAAAGTTCTAATTTTATTAATTCGATTCTAATTTTCGAATTTTTTAGTTTTTTTAATATAAAATAAAAGAAAAGAGAAAGTTGTAATTTTATGCCTCTTAGATCTTCATTTCTATTTTAATCATTTCTATTTTAAATGGTAGAAATTGAAACCTTTTTATTAAATATTTTATTAAATACAAATAAAAAAATTTTTAAATCGTGGAGGAAGGGGGGGCGGATGTAGCCTAGTGGATCATGGCAGTGGATTGTGAATCCACCATGACCGACGAACCCGATGCTGACTGGTATGGAACCTACTAAGTGATAACTTTCAAATTCAGAGAAACCCTGGAATCAAAAATGGGCAATCCTGAGCCAAATCCTGTTTTACAAGAACAAACAAGGGTTCAGAAAGCGAAAAAAAAAAAGGGGGATAGGTGCAGAGACTCAACGGAAGCTGTTCTAAAAAATGGGGTTGACTGCCTTTTTTGGTAAAGAAAGGAAAAGAAATCCTTCTATCGAATATCGAAACTCCATAAAGGATGAAGGATAAGCGTATATACACTATGTATACACAATGAAAAACTATCTCAAAAATGACAACCGAATCCGTATTTTTTTTTATGAAAAAAAAAAAAATTGTTATGAATCAATTCCAAGTTGAAAAAAGAATCGAATATTCATTGATCAAATCATTCACTCCATAGTCTGATCGATCTTTTCTTTTGAAAAACTGATTAATCGGACAAAAATAAAGATAGAGTCCCATTCTACATGTCAATATCAATACCGGCAACAATGAAATTTAAAGTAAGAGGAAAATCCGTCGACTTTAAAAATCGTGAGGGTTCAAGTCCTTTCTATTCCCCAA
>CH08
ATCGCTGACTAGCTGCTATTGAGCCCCATCTACAAATGGATAATTCTGTCTTAGTGGAGACGAGTTTTTGAAAATAACGGAGAAATACCGACTCTCTTGCAAGAGAGTCGGTATTTCTCCGTTATTTTTTATGTTTTTCTTTAGTAGTTTTTTATTTCTATCTTTTTTTTACGGGCAGTATTTTTATGCTTTTGCTTTGGAAGTGTCTGATATTTTTGTTATGGTTATGGGCTCATATTCGTTATGTACCAGTATAATAATATTAGTTATTTGTTAATCCCACTAATAAAGTTCTAATTTTATTAATTCGATTCTAATTTTCGAATTTTTTAGTTTTTTTAATATAAAATAAAAGAAAAGAGAAAGTTGTAATTTTATGCCTCTTAGATCTTCATTTCTATTTTAATCATTTCTATTTTAAATGGTAGAAATTGAAACCTTTTTATTAAATATTTTATTAAATAGAAATAAAAAAATTTTTAAATCGTGGAGGAAGGGGGGGCGGATGTAGCCAAGTGGATCAAGGCAGTGGATTGTGAATCCACCAAAAACGACGAACATGGCTGAGCTGGTATGGAACCTACTTAAGTGATAACTTTCAAATTCAGAGAAACCCTGGAATCAAAAATGGGCAATCCTGAGCCAAATCCTGTTTTACAAGAACAAACAAGGGTTCAGAAAGCGAAAAAAAAAAAGGGGGATAGGTGCAGAGACTCAACGGAAGCTGTTCTAAAAAATGGGGTTGACTGCCTTTTTTGGTAAAGAAAGGAAAAAAAATCCTTCTATCGAATATCGAAACTCCATAAAGGATGAAGGATAAGCGTATATACACTATGTATACACAATGAAAAACTATCTCAAAAATGACAACCGAATCCGTATTTTTTTTTATGAAAAAAAAAAAAATTGTTATGAATCAATTCCAAGTTGAAAAAAGAATCGAATATTCATTGATCAAATCATTCACTCCATAGTCTGATCGATCTTTTCTTTTGAAAAACTGATTAATCGGACAAGAATAAAGATAGAGTCCCATTCTACATGTCAATATCAATACCGGCAACAATGAAATTTAAAGTAAGAGGAAAATCCGTCGACTTTAAAAATCGTGAGGGTTCAAGTCCCTCTTATTCCCAAA
>CH09
ATCGTCTGACTAGCTGCTATTGAGCCCCATCTACAAATGGATAATTCTGTCTTAGTGGAGACGAGTTTTTGAAAATAACGGAGAAATACCGACTCTCTTGCAAGAGAGTCGGTATTTCTCCGTTATTTTTTATGTTTTTCTTTAGTAGTTTTTTATTTCTATCTTTTTTTTACGGGCAGTATTTTTATGCTTTTGCTTTGATTTTGTCTGATATTTTTGTTATGGTTATGGGCTCATATTCGTTATGTACCAGTATAATAATATTAGTTATTTGTTAATCCCACTAATAAAGTTCTAATTTTATTAATTCGATTCTAATTTTCGAATTTTTTAGTTTTTTTAATATAAAATAAAAGAAAAGAGAAAGTTGTAATTTTATGCCTCTTAGATCTTCATTTCTATTTTAATCATTTCTATTTTAAATGGTAGAAATTGAAACCTTTTTATTAAAAAATTTATTAAACACAAATAAAAAAATTTTTAAATCGTGGAGGAAGGGGGGGCGGATGTAGCCAAGTGGATCATGGCAGTGGATTGTTAATCCACCAACAAGCGACGACTTTGGATGACTTGGTATGGAACCTACTAAGTGATAACTTTCAAATTCAGAGAAACCCTGGAATCAAAAATGGGCAATCCTGAGCCAAATCCTGTTTTACAAGAACAAACAAGGGTTCAGAAAGCGAAAAAAAAAAAGGGGGATAGGTGCAGAGACTCAACGGAAGCTGTTCTAAAAAATGGGGTTGACTGCCTTTTTTGGTAAAGAAAGGAAAAAAAATCCTTCTATCGAATATCGAAACTCCATAAAGGATGAAGGATAAGCGTATATACACTATGTATACACAATGAAAAACTATCTCAAAAATGACAACCGAATCCGTATTTTTTTTTATGAAAAAAAAAAAAATTGTTATGAATCAATTCCAAGTTGAAAAAAGAATCGAATATTCATTGATCAAATCATTCACTCCATAGTCTGATCGATCTTTTCTTTTGAAAAACTGATTAATCGGACAAAAATAAAAATAGAGTCCCATTCTACATGTCAATATCAATACCGGCAACAATGAAATTTAAAGTAAGAGGAAAATCCGTCGACTTTAAAAATCGTGAGGGTTCAAGTCCCCTCTATTCCCCAA
>CH10
ATCTCTGACTAGCTGCTATTGAGCCCCATCTACAAATGGATAATTCTGTCTTAGTGGAGACGAGTTTTTGAAAATAACGGAGAAATACCGACTCTCTTGCAAGAGAGTCGGTATTTCTCCGTTATTTTTTATGTTTTTCTTTAGTAGTTTTTTATTTCTATCTTTTTTTTACGGGCAGTATTTTTATGCTTTTGCTTTGATTTTGTCTGATATTTTTGTTATGGTTATGGGCTCATATTCGTTATGTACCAGTATAATAATATTAGTTATTTGTTAATCCCACTAATAAAGTTCTAATTTTATTAATTCGATTCTAATTTTCGAATTTTTTAGTTTTTTTAATATAAAATAAAAGAAAAGAGAAAGTTGTAATTTTATGCCTCTTAGATCTTCATTTCTATTTAAATCATTTCTATTTTAAATGGTAGAAATTGAAACCTTTTTATTAAAAAATTTATTAAACACAAATAAAAAAATTTTTAAATCGTGGAGGAAGGGGGGGCGGATGTAGCCAAGTGGGACGAGGCAGTGGATTGTGAATCCACCAACACGCGAGGGAATATGCATGAGCTTGGTATGGACCTACTAAGTGATAACTTTCAAATTCAGAGAAACCCTGGAATCAAAAATGGGCAATCCTGAGCCAAATCCTGTTTTACAAGAACAAACAAGGGTTCAGAAAGCGAAAAAAAAAAAGGGGGATAGGTGCAGAGACTCAACGGAAGCTGTTCTAAAAAATGGGGTTGACTGCCTTTTTTGGTAAAGAAAGGAAAAAAAATCCTTCTATCGAATATCGAAACTCCATAAAGGATGAAGGATAAGCGTATATACACTATGTATACACAATGAAAAACTATCTCAAAAATGACAACCGAATCCGTATTTTTTTTTATGAAAAAAAAAAAAATTGTTATGAATCAATTCCAAGTTGAAAAAAAAATCGAATATTCATTGATCAAATCATTCACTCCATAGTCTGATCGATCTTTTCTTTTGAAAAACTGATTAATCGGACAAAAATAAAGATAGAGTCCCATTCTACATGTCAATATCAATACCGGCAACAATGAAATTTAAAGTAAAAGGAAAATCCGTCGACTTTAAAAATCGTGAGGGTTCAAGTCCTCCTTATTCCCCAA
>CH11
ATCCTCTGACTAGCTGCTATTGAGCCCCATCTACAAATGGATAATTCTGTCTTAGTGGAGACGAGTTTTTGAAAATAACGGAGAAATACCGACTCTCTTGCAAGAGAGTCGGTATTTCTCCGTTATTTTTTATGTTTTTCTTTAGTAGTTTTTTATTTCTATCTTTTTTTTGGGGCAGTATTTTTATGCTTTTGCTTTGGAAGTGTCTGATATTTTTGTTATGGTTATGGGCTCATATTCGTTATGTACCAGTATAATAATATTAGTTATTTGTTAATCCCACTAATAAAGTTCTAATTTTATTAATTCGATTCTAATTTTCGAATTTTTTAGTTTTTTTAATATAAAATAAAAGAAAAGAGAAAGTTGTAATTTTATGCCTCTTAGATCTTCATTTCTATTTAAATCATTTCTATTTTAAATGGTAGAAATTGAAACCCTTTTTTTAAAAATTTTATTAACCACAAATAAAAAAATTTTTAATTCGTGGAGGAAGGGGGGGCGGACGTGGCCTAGTGGAACGTGGCAGGGGATTGTGAATCCCCTAACAACCGAGCGAAAAATGCATGAGCTTGGTATGGAACCTACTAAGTGATAACTTTCAAATTCAGAGAAACCCTGGAATCAAAAATGGGCAATCCTGAGCCAAATCCTGTTTTACAAGAACAAACAAGGGTTCAGAAAGCGAAAAAAAAAAAGGGGGATAGGTGCAGAGACTCAACGGAAGCTGTTCTAAAAAATGGGGTTGACTGCCTTTTTTGGTAAAAAAAGGAAAAAAAATCCTTCTATCGAATATCGAAACTCCATAAAGGATGAAGGATAAGCGTATATACACTATGTATACACAATGAAAAACTATCTCAAAAATGACAACCGAATCCGTATTTTTTTTTATGAAAAAAAAAAAAATTGTTATGAATCAATTCCAAGTTGAAAAAAAAATCGAATATTCATTGATCAAATCATTCACTCCATAGTCTGATCGATCTTTTCTTTTGAAAAACTGATTAATCGGACAAAAATAAAAATAGAGTCCCATTCTACATGTCAATATCAATACCGGCAACAATGAAATTTAAAGTAAGAGGAAAATCCGTCGACTTTAAAAATCGTGAGGGTTCAAGTCCCTCTTTTCCCCAA
>CH12
AATCTCTGACTAGCTGCTATTGAGCCCCATCTACAAATGGATAATTCTGTCTTAGTGGAGACGAGTTTTTGAAAATAACGGAGAAATACCGACTCTCTTGCAAGAGAGTCGGTATTTCTCAGTTATTTTTTATGTTTTTCTTTAGTAGTTTTTTATTTCTATCTTTTTTTTGGGGCAGTATTTTTATGCTTTTGCTTGGGAAGTGTCTGATATTTTTGTTATGGTTATGGGCTCATATTCGTTATGTACCAGTATAATAATATTAGTTATTTGTTAATCCCACTAATAAAGTTCTAATTTTATTAATTCGATTCTAATTTTCGAATTTTTTAGTTTTTTTAATATAAAATAAAAGAAAAGAGAAAGTTGTAATTTTATGCCTCTTAGATCTTCATTTCTATTTAAATCATTTCTATTTTAAATGGTAGAAATTGAAACCCTTTTATTAAAAAATTTATTAACCACAAATAAAAAAATTTTTAAATCTAGGAGGAAGGGGGGGCGGACGTAGCCAAGTGGATCGTGGCAGGGGATTGTTTATCCACCAACAAGCGAAGGAATTTGCATTGAGCTTGGTATGGACCTACTAAGTGATAACTTTCAAATTCAGAGAAACCCTGGAATCAAAAATGGGCAATCCTGAGCCAAATCCTGTTTTACAAGAACAAACAAGGGTTCAGAAAGCGAAAAAAAAAAAGGGGGATAGGTGCAGAGACTCAACGGAAGCTGTTCTAAAAAATGGGGTTGACTGCCTTTTTTGGTAAAAAAAGGAAAAAAAATCCTTCTATCGAATATCGAAACTCCATAAAGGATGAAGGATAAGCGTATATACACTATGTATACACAATGAAAAACTATCTCAAAAATGACAACCGAATCCGTATTTTTTTTTATGAAAAAAAAAAAAATTGTTATGAATCAATTCCAAGTTGAAAAAAAAATCGAATATTCATTGATCAAATCATTCACTCCATAGTCTGATCGATCTTTTCTTTTGAAAAACTGATTAATCGGACAAAAATAAAGATAGAGTCCCATTCTACATGTCAATATCAATACCGGCAACAATGAAATTTAAAGTAAGAGGAAAATCCGTCGACTTTAAAAATCGTGAGGGTTCAAGTCCCTTTTATTCCCCAA
>CH13
ATGTTGACTAGCTGCTATTGAGCCCCATCTACAAATGGATAATTCTGTCTTAGTGGAGACGAGTTTTTGAAAATAACGGAGAAATACCGACTCTCTTGCAAGAGAGTCGGTATTTCTCCGTTATTTTTTATGTTTTTCTTTAGTAGTTTTTTATTTCTATCTTTTTTTTACGGGCATTATTTTTATGCTTTTGCTTGGTTTTGTCTGATATTTTTGTTATGGTTATGGGCTCATATTCGTTATGTACCAGTATAATAATATTAGTTATTTGTTAATCCCACTAATAAAGTTCTAATTTTATTAATTCGATTCTAATTTTCGAATTTTTTAGTTTTTTTAATATAAAATAAAAGAAAAGAGAAAGTTGTAATTTTATGCCTCTTAGATCTTCATTTCTATTTAAATCATTTCTATTTTAAATGGTAGAAATTGAAACCTTTTTTTTAAAAATTTTATTAAACACAAATAAAAAAATTTTTAAATCTAGGAGGAAGGGGGGGCGGACGTAGCCAAGTGGATCGTGGCGAGGGATTGTTTATCCACCAACAACCGAGGGAATTTGCATGAGCTTGGTATGGACCTACTTAAGTGATAACTTTCAAATTCAGAGAAACCCTGGAATCAAAAATGGGCAATCCTGAGCCAAATCCTGTTTTACAAGAACAAACAAGGGTTCAGAAAGCGAAAAAAAAAAAGGGGGATAGGTGCAGAGACTCAACGGAAGCTGTTCTAAAAAATGGGGTTGACTGCCTTTTTTGGTAAAGAAAGGAAAAAAAATCCTTCTATCGAATATCGAAACTCCATAAAGGATGAAGGATAAGCGTATATACACTATGTATACACAATGAAAAACTATCTCAAAAATGACAACCGAATCCGTATTTTTTTTTATGAAAAAAAAAAAAATTGTTATGAATCAATTCCAAGTTGAAAAAAGAATCGAATATTCATTGATCAAATCATTCACTCCATAGTCTGATCGATCTTTTCTTTTGAAAAACTGATTAATCGGACAAAAATAAAGATAGAGTCCCATTCTACATGTCAATATCAATACCGGCAACAATGAAATTTAAAGTAAGAGGAAAATCCGTCGACTTTAAAAATCGTGAGGGTTCAAGTCCCTCTTATTCCCCAA
>CH14
AATCACAGACTAGCTGCTATTGAGCCCCATCTACAAATGGATAATTCTGTCTTAGTGGAGACGAGTTTTTGAAAATAACGGAGAAATACCGACTCTCTTGCAAGAGAGTCGGTATTTCTCCGTTATTTTTTATGTTTTTCCTTAGTAGTTTTTTATTTCTATCTTTTTTTTACGGGCAGTATTTTTATGCTTTTGCTTTGGTTTGTCTGATATTTTTGTTATGGTTATGGGCTCATATTCGTTATGTACCAGTATAATAATATTAGTTATTTGTTAATCCCACTAATAAAGTTCTAATTTTATTAATTCGATTCTAATTTTCGAATTTTTTAGTTTTTTTAATATAAAATAAAAGAAAAGAGAAAGTTGTAATTTTATGCCTCTTAGATCTTCATTTCTATTTTAATCATTTCTATTTTAAATGGTAGAAATTGAAACCTTTTTATTAAATATTTTATTAAATACAAATAAAAAAATTTTTAAATCGTGGAGGAAGGGGGGGCGGATGTAGCCAAGTGGATCGAGGCAGTGGATTGTGAATCCACCAACACACGAACGAGTTTCATGCATGAGCTGGTATGGAACCTACTAAGTGATAACTTTCAAATTCAGAGAAACCCTGGAATCAAAAATGGGCAATCCTGAGCCAAATCCTGTTTTACAAGAACAAACAAGGGTTCAGAAAGCGAAAAAAAAAAAGGGGGATAGGTGCAGAGACTCAACGGAAGCTGTTCTAAGAAATGGGGTTGACTGCCTTTTTTGGTAAAGAAAGGAAAAAAAATCCTTCTATCGAATATCGAAACTCCATAAAGGATGAAGGATAAGCGTATATACACTATGTATACACAATGAAAAACTATCTCAAAAATGACAACCGAATCCGTATTTTTTTTTATGAAAAAAAAAAAAATTGTTATGAATCAATTCCAAGTTGAAAAAAGAATCGAATATTCATTGATCAAATCATTCACTCCATAGTCTGATCGATCTTTTCTTTTGAAAAACTGATTAATCGGACAAAAATAAAGATAGAGTCCCATTCTACATGTCAATATCAATACCGGCAACAATGAAATTTAAAGTAAGAGGAAAATCCGTCGACTTTAAAAATCGTGAGGGTTCAAGTCCTTCTTATTCCCCAA
>CH15
ATCACTGACTAGCTGCTATTGAGCCCCATCTACAAATGGATAATTCTGTCTTAGTGGAGACGAGTTTTTGAAAATAACGGAGAAATACCGACTCTCTTGCAAGAGAGTCGGTATTTCTCCGTTATTTTTTATGTTTTTCTTTAGTAGTTTTTTATTTCTATCTTTTTTTTACGAAAATTATTTTTATGCTTTTGCTTTGGTTTGTCTGATATTTTTGTTATGGTTATGGGCTCATATTCGTTATGTACCAGTATAATAATATTAGTTATTTGTTAATCCCACTAATAAAGTTCTAATTTTATTAATTCGATTCTAATTTTCGAATTTTTTAGTTTTTTTAATATAAAATAAAAGAAAAGAGAAAGTTGTAATTTTATGCCTCTTAGATCTTCATTTCTATTTTAATCATTTCTATTTTAAATGGTAGAAATTGAAACCTTTTTTTTAAAAATTTTATTAAATACAAATAAAAAAATTTTTAAATCGTGGAGGAAGGGGGGGCGGATGTAGCCTAGTGGGTCAATGCAGTGGATTGTGAATCCCCCAACACGCGAGGGAAGTTGGATGACTTGGTATGGACCTACTTAAGTGATAACTTTCAAATTCAGAAGAAACCCTGGAATCAAAAATGGGCAATCCTGAGCCAAATCCTGTTTTACAAGAACAAACAAGGGTTCAGAAAGCGAAAAAAAAAAAGGGGGATAGGTGCAGAGACTCAACGGAAGCTGTTCTAAAAAATGGGGTTGACTGCCTTTTTTGGTAAAGAAAGGAAAAAAAATCCTTCTATCGAATATCGAAACTCCATAAAGGATGAAGGATAAGCGTATATACACTATGTATACACAATGAAAAACTATCTCAAAAATGACAACCGAATCCGTATTTTTTTTTATGAAAAAAAAAAAAATTGTTATGAATCAATTCCAAGTTGAAAAAAGAATCGAATATTCATTGATCAAATCATTCACTCCATAGTCTGATCGATCTTTTCTTTTGAAAAACTGATTAATCGGACAAAAATAAAGATAGAGTCCCATTCTACATGTCAATATCAATACCGGCAACAATGAAATTTAAAGTAAAAGGAAAATCCGTCGACTTTAAAAATCGTGAGGGTTCAAGTCCTTCTTATCCCCCAA
>CH16
AATCTCAAGACTAGCTGCTATTGAGCCCCATCTACAAATGGATAATTCTGTCTTAGTGGAGACGAGTTTTTGAAAATAACGGAGAAATACCGACTCTCTTGCAAGAGAGTCGGTATTTCTCCGTTATTTTTTATGTTTTGTCTTAGTAGTTTTTTAATTCTATCTTTTTTTTACGGGCATTATTAGCAGCCTTTTGCTTAGGGAAGTGTCGGATATTTTTGTTATGGATAAGGGCTCATATTCGTTATGTACCAATATAATAATATTAGTTATTTGTTAATCCCACTAATAAAGTTCTAATTTTATTAATTCGATTCTAATTTTCGAATTTTTTAGTTTTTTTAATATAAAATAAAAGAAAAGAGAAAGTTGTAATTTTATGCCTCTTAGATCTTCATTTCTATAGAAATAATTTCTATTTTAAATGGTGTAAATTTTTCCCCTTTTTTTTAAAAAATTCGTAACCACAAATAAAAAAATTTTTTTTGTAGGAGGGCTGGGGGGCGGATGGGGTCAAGTGGGACGTGGGGGGCATTTGTTTGATCCACCCAACCCGAGGGAGCTGTTGGCTGGCTTGGTATGGAACCTACTAAGTGATAACTTTCAAATTCAGAGAAACCCTGGAATCAAAAATGGGCAATCCTGAGCCAAATCCTGTTTTACAAGAACAAACAAGGGTTCAGAAAGCGAAAAAAAAAAAGGGGGATAGGTGCAGAGACTCAACGGAAGCTGTTCTAAAAAATGGGGTTGACTGCCTTTTTTGGTAAAGAAAGGAAAAAAAATCCTTCTATCGAATATCGAAACTCCATAAAGGATGAAGGATAAGCGTATATACACTATGTATACACAATGAAAAACTATCTCAAAAATGACAACCGAATCCGTATTTTTTTTTATGAAAAAAAAAAAAATTGTTATGAATCAATTCCAAGTTGAAAAAAGAATCGAATATTCATTGATCAAATCATTCACTCCATAGTCTGATCGATCTTTTCTTTTGAAAAACTGATTAATCGGACAAAAATAAAGATAGAGTCCCATTCTACATGTCAATATCAATACCGGCAACAATGAAATTTAAAGTAAGAGGAAAATCCGTCGACTTTAAAAATCGTGAGGGTTCAAGTCCTTCTTATTCCCCAA
>CH17
ATTCTCTGACTAGCTGCTATTGAGCCCCATCTACAAATGGATAATTCTGTCTTAGTGGAGACGAGTTTTTGAAAATAACGGAGAAATACCGACTCTCTTGCAAGAGAGTCGGTATTTCTCCGTTATTTTTTATGTTTTTCCTTAGTAGTTTTTTATTTCTATCTTTTTTTTACGAAAAGTATTTTTATGCTTTTGCTTTGGTTTGTCTGATATTTTTGTTATGGTTATGGGCTCATATTCGTTATGTACCAGTATAATAATATTAGTTATTTGTTAATCCCACTAATAAAGTTCTAATTTTATTAATTCGATTCTAATTTTCGAATTTTTTAGTTTTTTTAATATAAAATAAAAGAAAAGAGAAAGTTGTAATTTTATGCCTCTTAGATCTTCATTTCTATTTTAATCATTTCTATTTTAAATGGTGTAAATTGAAACCTTTTTTTTAAAAATTTTATTAAATACAAATAAAAAAATTTTTAAATCGTGGAGGAAGGGGGGGCGGATGTAGCCAAGTGGATCGAGGCAGTGGATTGTGAATCCCCCATACGCGAGAGAACTCCATGCATGAGCTGGTTGGAACCTACTAAGTGATAACTTTCAAATTCAGAGAAACCCTGGAATCAAAAATGGGCAATCCTGAGCCAAATCCTGTTTTACAAGAACAAACAAGGGTTCAGAAAGCGAAAAAAAAAAAGGGGGATAGGTGCAGAGACTCAACGGAAGCTGTTCTAAAAAATGGGGTTGACTGCCTTTTTTGGTAAAAAAAGGAAAAAAAATCCTTCTATCGAATATCGAAACTCCATAAAGGATGAAGGATAAGCGTATATACACTATGTATACACAATGAAAAACTATCTCAAAAATGACAACCGAATCCGTATTTTTTTTTATGAAAAAAAAAAAAATTGTTATGAATCAATTCCAAGTTGAAAAAAGAATCGAATATTCATTGATCAAATCATTCACTCCATAGTCTGATCGATCTTTTCTTTTGAAAAACTGATTAATCGGACAAAAATAAAGATAGAGTCCCATTCTACATGTCAATATCAATACCGGCAACAATGAAATTTAAAGTAAGAGGAAAATCCGTCGACTTTAAAAATCGTGAGGGTTCAAGTCCCTCTTATCCCCCAA
>CH18
ATTCGCTGACTAGCTGCTATTGAGCCCCATCTACAAATGGATAATTCTGTCTTAGTGGAGACGAGTTTTTGAAAATAACGGAGAAATACCGACTCTCTTGCAAGAGAGTCGGTATTTCTCCGTTATTTTTTATGTTTTTCTTTAGTAGTTTTTTATTTCTATCTTTTTTTTACGGGAATTATTTTTATGCTTTTGCTTTGGTTTGTCTGATATTTTTGTTATGGTTATGGGCTCATATTCGTTATGTACCAGTATAATAATATTAGTTATTTGTTAATCCCACTAATAAAGTTCTAATTTTATTAATTCGATTCTAATTTTCGAATTTTTTAGTTTTTTTAATATAAAATAAAAGAAAAGAGAAAGTTGTAATTTTATGCCTCTTAGATCTTCATTTCTATTTTAATCATTTCTATTTTAAATGGTAGAAATTGAAACCTTTTTATTAAATATTTTATTAAATAGAAATAAAAAAATTTTTAAATCGTGGAGGAAGGGGGGGCGGATGTAGCCAAGTGGATCAAGGCAGTGGATTGTGAATCCACCAACAAGCGAGCGAATATGCATGAGCTTGGTATGGAACCTACTAAGTGATAACTTTCAAATTCAGAGAAACCCTGGAATCAAAAATGGGCAATCCTGAGCCAAATCCTGTTTTACAAGAACAAACAAGGGTTCAGAAAGCGAAAAAAAAAAAGGGGGATAGGTGCAGAGACTCAACGGAAGCTGTTCTAAAAAATGGGGTTGACTGCCTTTTTTGGTAAAGAAAGGAAAAAAAATCCTTCTATCGAATATCGAAACTCCATAAAGGATGAAGGATAAGCGTATATACACTATGTATACACAATGAAAAACTATCTCAAAAATGACAACCGAATCCGTATTTTTTTTTATGAAAAAAAAAAAAATTGTTATGAATCAATTCCAAGTTGAAAAAAGAATCGAATATTCATTGATCAAATCATTCACTCCATAGTCTGATCGATCTTTTCTTTTGAAAAACTGATTAATCGGACAAAAATAAAGATAGAGTCCCATTCTACATGTCAATATCAATACCGGCAACAATGAAATTTAAAGTAAAAGGAAAATCCGTCGACTTTAAAAATCGTGAGGGTTCAGGTCTTCTTTATTCCCCAA
>CH19
AATTCCCCTGACTAGCTGCTATTGAGCCCCATCTACAAATGGATAATTCTGTCTTAGTGGAGACGAGTTTTTGAAAATAACGGAGAAATACCGACTCTCTTGCAAGAGAGTCGGTATTTCTCAGTTATTTTTTATGTTTTTCTTTAGTAGTTTTTTATTTCTATCTTTTTTTTACGGGAAGTATTTTTATGCTTTTGCTTTGGTTTGTCTGATATTTTTGTTATGGTTATGGGCTCATATTCGTTATGTACCAGTATAATAATATTAGTTATTTGTTAATCCCACTAATAAAGTTCTAATTTTATTAATTCGATTCTAATTTTCGAATTTTTTAGTTTTTTTAATATAAAATAAAAGAAAAGAGAAAGTTGTAATTTTATGCCTCTTAGATCTTCATTTCTATTTAAATCATTTCTATTTTAAATGGTAGAAATTGAAACCTTTTTATTAAAAATTTTATTAAATACAAATAAAAAAATTTTTAAATCGTGGAGGAAGGGGGGGCGGATGTAGCCAAGTGGATCAAGGCAGTGGATTGTGAATCCACCAACAAGCGAGCGAACATGCATGAGCTTGGTATGGAACCTACTAAGTGATAACTTTCAAATTCAGAGAAACCCTGGAATCAAAAATGGGCAATCCTGAGCCAAATCCTGTTTTACAAGAACAAACAAGGGTTCAGAAAGCGAAAAAAAAAAAGGGGGATAGGTGCAGAAACTCAACGGAAGCTGTTCTAAAAAATGGGGTTGACTGCCTTTTTTGGTAAAAAAAGGAAAAAAAATCCTTCTATCGAATATCGAAACTCCATAAAGGATGAAGGATAAGCGTATATACACTATGTATACACAATGAAAAACTATCTCAAAAATGACAACCGAATCCGTATTTTTTTTTATGAAAAAAAAAAAAATTGTTATGAATCAATTCCAAGTTGAAAAAAAAATCGAATATTCATTGATCAAATCATTCACTCCATAGTCTGATCGATCTTTTCTTTTGAAAAACTGATTAATCGGACAAAAATAAAGATAGAGTCCCATTCTACATGTCAATATCAATACCGGCAACAATGAAATTTAAAGTAAGAGGAAAATCCGTCGACTTTAAAAATCGTGAGGGTTCAAGTCTTTCTTATTCCCCAA
>CH20
CCATTGACTAGCTGCTATTGAGCCCCATCTACAAATAGGATAATTCTGTCTTAGTGGAGACGAGTTTTTGAAAATAACGGAGAAATACCGACTCTCTTGCAAGAGAGTCGGTATTTCTCCGTTATTTTTTATGTTTTTCTTTAGTAGTTTTTTATTTCTATCTTTTTTTTACGGGAAGTATTTTTATGCTTTTGCTTTGATTTTGTCTGATATTTTTGTTATGGTTATGGGCTCATATTCGTTATGTACCAGTATAATAATATTAGTTATTTGTTAATCCCACTAATAAAGTTCTAATTTTATTAATTCGATTCTAATTTTCGAATTTTTTAGTTTTTTTAATATAAAATAAAAGAAAAGAGAAAGTTGTAATTTTATGCCTCTTAGATCTTCATTTCTATTTTAATCATTTCTATTTTAAATGGTAGAAATTGAAACCTTTTTATTAAATATTTTATTAAATACAAATAAAAAAATTTTTAAATCGTGGAGGAAGGGGGGGCGGATGTAGCCAAGTGGATCAAGGCAGGGGATTGTGAATCCACCAACAAGCGACGAATTTGCATGAGCTTGGTATGGAACCTACTAAGTGATAACTTTCAAATTCAGAGAAACCCTGGAATCAAAAATGGGCAATCCTGAGCCAAATCCTGTTTTACAAGAACAAACAAGGGTTCAGAAAGCGAAAAAAAAAAAGGGGGATAGGTGCAGAGACTCAACGGAAGCTGTTCTAAAAAATGGGGTTGACTGCCTTTTTTGGTAAAGAAAGGAAAAAAAATCCTTCTATCGAATATCGAAACTCCATAAAGGATGAAGGATAAGCGTATATACACTATGTATACACAATGAAAAACTATCTCAAAAATGACAACCGAATCCGTATTTTTTTTTATGAAAAAAAAAAAAATTGTTATGAATCAATTCCAAGTTGAAAAAAGAATCGAATATTCATTGATCAAATCATTCACTCCATAGTCTGATCGATCTTTTCTTTTGAAAAACTGATTAATCGGACAAAAATAAAGATAGAGTCCCATTCTACATGTCAATATCAATACCGGCAACAATGAAATTTAAAGTAAGAGGAAAATCCGTCGACTTTAAAAATCGTGAGGGTTCAAGTCCCTCTTATTCCCCAA
>CH21
ATTCTTGACTAGCTGCTATTGAGCCCCATCTACAAATGGATAATTCTGTCTTAGTGGAGACGAGTTTTTGAAAATAACGGAGAAATACCGACTCTCTTGCAAGAGAGTCGGTATTTCTCCGTTATTTTTTATGTTTTTCTTTAGTAGTTTTTTATTTCTATCTTTTTTTTACGGGCAGTATTTTTATGCTTTTGCTTTGGAAGGTCTGATATTTTTGTTATGGTTATGGGCTCATATTCGTTATGTACCAGTATAATAATATTAGTTATTTGTTAATCCCACTAATAAAGTTCTAATTTTATTAATTCGATTCTAATTTTCGAATTTTTTAGTTTTTTTAATATAAAATAAAAGAAAAGAGAAAGTTGTAATTTTATGCCTCTTAGATCTTCATTTCTATTTTAATCATTTCTATTTTAAATGGTAGAAATTGAAACCTTTTTATTAAATATTTTATTAAACAGAAATAAAAAAATTTTTAAATCGTGGAGGAAGGGGGGGCGGATGTAGCCAAGTGGATCATGGCAATGGATTGTGAATCCACCAACAAGCGACGAATTTGCCATGAGCTTGGTATGGACCTACTTAAGTGATAACTTTCAAATTCAGAAGAAACCCTGGAATCAAAAATGGGCAATCCTGAGCCAAATCCTGTTTTACAAGAACAAACAAGGGTTCAGAAAGCGAAAAAAAAAAAGGGGGATAGGTGCAGAGACTCAACGGAAGCTGTTCTAAAAAATGGGGTTGACTGCCTTTTTTGGTAAAGAAAGGAAAAAAAATCCTTCTATCGAATATCGAAACTCCATAAAGGATGAAGGATAAGCGTATATACACTATGTATACACAATGAAAAACTATCTCAAAAATGACAACCGAATCCGTATTTTTTTTTATGAAAAAAAAAAAAATTGTTATGAATCAATTCCAAGTTGAAAAAAGAATCGAATATTCATTGATCAAATCATTCACTCCATAGTCTGATCGATCTTTTCTTTTGAAAAACTGATTAATCGGACAAAAATAAAGATAGAGTCCCATTCTACATGTCAATATCAATACCGGCAACAATGAAATTTAAAGTAAAAGGAAAATCCGTCGACTTTAAAAATCGTGAGGGTTCAAGTCCTTTTTATTCCCCCAA
>CH22
TCACCTGACTAGCTGCTATTGAGCCCCATCTACAAATGGATAATTCTGTCTTAGTGGAGACGAGTTTTTGAAAATAACGGAGAAATACCGACTCTCTTGCAAGAGAGTCGGTATTTCTCCGTTATTTTTTATGTTTTTCCTCAGTAGTTTTTTATTTCTATCTTTTTTTTGGGGCAGTATTTTTATGCTTTTGCTTTGGAAGTGTCTGATATTTTTGTTATGGTTATGGGCTCATATTCGTTATGTACCAGTATAATAATATTAGTTATTTGTTAATCCCACTAATAAAGTTCTAATTTTATTAATTCGATTCTAATTTTCGAATTTTTTAGTTTTTTTAATATAAAATAAAAGAAAAGAGAAAGTTGTAATTTTATGCCTCTTAGATCTTCATTTCTATTTTAATCATTTCTATTTTAAATGGTAGAAATTGAAACCTTTTTATTAAATATTTTATTAAATACAAATAAAAAAATTTTTAAATCGTGGAGGAAGGGGGGGCGGATGTAGCCAAGTGGATCGAGGCAGTGGATTGTGAATCCACCAACACGCGAGCGAGGCATGCATGAGCTTGGTATGGAACCTACTAAGTGATAACTTTCAAATTCAGAGAAACCCTGGAATCAAAAATGGGCAATCCTGAGCCAAATCCTGTTTTACAAGAACAAACAAGGGTTCAGAAAGCGAAAAAAAAAAAGGGGGATAGGTGCAGAGACTCAACGGAAGCTGTTCTAAAAAATGGGGTTGACTGCCTTTTTTGGTAAAGAAAGGAAAAGAAATCCTTCTATCGAATATCGAAACTCCATAAAGGATGAAGGATAAGCGTATATACACTATGTATACACAATGAAAAACTATCTCAAAAATGACAACCGAATCCGTATTTTTTTTTATGAAAAAAAAAAAAATTGTTATGAATCAATTCCAAGTTGAAAAAAGAATCGAATATTCATTGATCAAATCATTCACTCCATAGTCTGATCGATCTTTTCTTTTGAAAAACTGATTAATCGGACAAGAATAAAGATAGAGTCCCATTCTACATGTCAATATCAATACCGGCAACAATGAAATTTAGAGTAAGAGGAAAATCCGTCGACTTTAAAAATCGTGAGGGTTCAAGTCCCTCTTTATCCCCAA
>HD01
ATCTCTGACTAGCTGCTATTGAGCCCCATCTACAAATGGATAATTCTGTCTTAGTAGAGACGAGTTTTTGAAAATAACGGAGAAATACCGACTCTCTTGCAAGAGAGTCGGTATTTCTCCGTTATTTTTTATGTTTTTCTTTAGTAGTTTTTTATTTCTATCTTTTTTTTACGAAAAGTATTTTTATGCTTTTGCTTTTATTTTGTCTGATATTTTTGTTATGGTTATGGGCTCATATTCGTTATGTACCAGTATAATAATATTAGTTATTTGTTAATCCCACTAATAAAGTTCTAATTTTATTAATTCGATTCTAATTTTCGAATTTTTTAGTTTTTTTAATATAAAATAAAAGAAAAGAGAAAGTTGTAATTTTATGCCTCTTAAATCTTCATTTCTATTTTAAATGGTAGAAATTGAAACCTTTTTATTAAATATTTTATTAAATAGAAATAAAAAAAATTTTAAATCTTGGAGGAAGGGGGGGCGGATGTAGCCAAGTGGATCAAGGCAGTGGATTGTGAATCCCCCATACGCGAGGAAGATGCATGAGCTGGTTGGAACCTACTAAGTGATAACTTTCAAATTCAGAGAAACCCTGGAATCAAAAATGGGCAATCCTGAGCCAAATCCTGTTTTACAAGAACAAACAAGGGTTCAGAAAGCGAAAAAAAAAAAAGGGGGATAGGGGCAAAAACTCAACGGAAGCTGTTCTAAAAAAGGGGGTTGACTGCCTTTTTTGGTAAAAAAAGGAAAAAAAATCCTTCTATCAAATATCGAAACTCCATAAAGGATGAAGGATAAGCGTATATACCCTATGTATACACAATGAAAAACTATCTCAAAAATGACAACCGAATCCGTATTTTTTTTTATGAAAAAAAAAAAAATTGTTATGAATCAATTCCAAGTTGAAAAAAAAATCAAATATTCTTTGATCAAATCATTCCCTCCATAGTCTGATCGATCTTTTCTTTTGAAAAACTGATTAATCGGACAAAAATAAAAATAAAGTCCCATTCTACTTGTCAATATCAATACCGGCAACAATGAAATTTAAAGTAAAAGGAAAATCCGTCAACTTTAAAAATCGGGAGGGTTCAAGTCCCTCTTTTCCCCAA
>HD02
ATCACTGACTAGCTGCTATTGAGCCCCATCTACAAATGGATAATTCTGTCTTAGTAGAGACGAGTTTTTGAAAATAACGGAGAAATACCGACTCTCTTGCAAGAGAGTCGGTATTTCTCCGTTATTTTTTATGTTTTTCTTTAGTAGTTTTTTATTTCTATCTTTTTTTTACGGGAAGTATTTTTATGCTTTTGCTTTTATTTTGTCTGATATTTTTGTTATGGTTATGAGCTCATATTCGTTATGTACCAGTATAATAATATTAGTTATTTGTTAATCCCACTAATAAAGTTCTAATTTTATTAATTCGATTCTAATTTTCGAATTTTTTAGTTTTTTTAATATAAAATAAAAGAAAAGAGAAAGTTGTAATTTTATGCCTCTTAAATCTTCATTTCTATTTTAAATGGTAGAAATTGAAACCTTTTTATTAAATATTTTATTAAATACAAATAAAAAAAATTTTAAATCGTGGAGGAGGGGGGGGCGGATGTAGCCAAGTGGATCAAGGCAGTGGATTGTGAATCCCCCACACGCGAGGACTATGATGAGCTTGGTATGGAACCTACTAAGTGATAACTTTCAAATTCAGAGAAACCCTGGAATCAAAAATGGGCAATCCTGAGCCAAATCCTGTTTTACAAGAACAAACAAGGGTTCAGAAAGCGAAAAAAAAAAAAGGGGGATAGGGGCAAAAACTCAACGGAAGCTGTTCTAAAAAATGGGGTTGACTGCCTTTTTTGGTAAAAAAAGGAAAAAAAATCCTTCTATCGAATATCGAAACTCCATAAAGGATGAAGGATAAGCGTATATACACTATGTATACACAATGAAAAACTATCTCAAAAATGACAACCGAATCCGTATTTTTTTTTATGAAAAAAAAAAAAATTGTTATGAATCAATTCCAAGTTGAAAAAAAAATCAAATATTCTTTGATCAAATCATTCCCTCCATAGTCTGATCGATCTTTTCTTTTGAAAAACTGATTAATCGGACAAAAATAAAAATAAAGTCCCATTCTACATGTCAATATCAATACCGGCAACAATGAAATTTAAAGTAAAAGGAAAATCCGTCAACTTTAAAAATCGGGAGGGTTCAAGTCCTTTTTTTCCCCAAA
>HD03
ACCTTCTCTGACTAGCTGCTATTGAGCCCCATCTACAAATGGATAATTCTGTCTTAGTAGAGACGAGTTTTTGAAAATAACGGAGAAATACCGACTCTCTTGCAAGAGAGTCGGTATTTCTCCGTTATTTTTTATGTTTTTCTTTAGTAGTTTTTTATTTCTATCTTTTTTTTACGAAAAGTATTTTTATGCTTTTGCTTTTATTTTGTCTGATATTTTTGTTATGGTTATGAGCTCATATTCGTTATGTACCAGTATAATAATATTAGTTATTTGTTAATCCCACTAATAAAGTTCTAATTTTATTAATTCGATTCTAATTTTCGAATTTTTTAGTTTTTTTAATATAAAATAAAAGAAAAGAGAAAGTTGTAATTTTATGCCTCTTAAAAATTCATTTCTATTTTAAATGGTAGAAATTGAAACCCTTTTATTAAATATTTTATTAAATACAAATAAAAAAAATTTCATATCGTGGAGGAAGGGGGGGCGGACGTGGCCCAGTGGATAATGGCAGGGGATTGTGAAACCACTAAACGCGAGGACATTTGGCTTGAGCTGGTATGGAACCTACTAAGTGATAACTTTCAAATTCAGAGAAACCCTGGAATCAAAAATGGGCAATCCTGAGCCAAATCCTGTTTTACAAGAACAAACAAGGGTTCAGAAAGCGAAAAAAAAAAAAGGGGGATAGGGGCAAAAACTCAACGGAAGCTGTTCTAAAAAATGGGGTTGACTGCCTTTTTTGGTAAAAAAAGGAAAAAAAATCCTTCTATCGAATATCGAAACTCCATAAAGGATGAAGGATAAGCGTATATACACTATGTATACACAATGAAAAACTATCTCAAAAATGACAACCGAATCCGTATTTTTTTTTATGAAAAAAAAAAAAATTGTTATGAATCAATTCCAAGTTGAAAAAAAAATCGAATATTCTTTGATCAAATCATTCCCTCCATAGTCTGATCGATCTTTTCTTTTGAAAAACTGATTAATCGGACAAAAATAAAAATAGAGTCCCATTCTACATGTCAATATCAATACCGGCAACAATGAAATTTAAAGTAAAAGGAAAATCCGTCAACTTTAAAAATCGGGAGGGTTCAAGTCCTTTTTTCCCCAAA
>HD04
AGTCACTGACTAGCTGCTATTGAGCCCCATCTACAAATGGATAATTCTGTCTTAGTAGAGACGAGTTTTTGAAAATAACGGAGAAATACCGACTCTCTTGCAAGAGAGTCGGTATTTCTCCGTTATTTTTTATGTTTTTCCTTAGTAGTTTTTTATTTCTATCTTTTTTTTACGAAAAGTATTTTTATGCTTTTGCTTTTATTTTGTCTGATATTTTTGTTATGGTTATGGGCTCATATTCGTTATGTACCAGTATAATAATATTAGTTATTTGTTAATCCCACTAATAAAGTTCTAATTTTATTAATTCGATTCTAATTTTCGAATTTTTTAGTTTTTTTAATATAAAATAAAAGAAAAGAGAAAGTTGTAATTTTATGCCTCTTAAATCTTCATTTCTATTTTAAATGGTAGAAATTGAAACCTTTTTATTAAATATTTTATTAAATACAAATAAAAAAAATTTTAAATCTTGGAGGAAGGGGGGGCGGATGTAGCCAAGTGGATCAAGGCAGTGGATTGTGAATCCCCCATGACCGAGAAGCCCCATGCTGAGCTGGTTGGAACCTACTAAGTGATAACTTTCAAATTCAGAGAAACCCTGGAATCAAAAATGGGCAATCCTGAGCCAAATCCTGTTTTACAAGAACAAACAAGGGTTCAGAAAGCGAAAAAAAAAAAAGGGGGATAGGGGCAAAAACTCAACGGAAGCTGTTCTAAAAAAGGGGGTTGACTGCCTTTTTTGGTAAAAAAAGGAAAAAAAATCCTTCTATCGAATATCGAAACTCCATAAAGGATGAAGGATAAGCGTATATACACTATGTATACCCAATGAAAAACTATCTCAAAAATGACAACCGAATCCGTATTTTTTTTTATGAAAAAAAAAAAAATTGTTATGAATCAATTCCAAGTTGAAAAAAAAATCGAATATTCTTTGATCAAATCATTCCCTCCATAGTCTGATCGATCTTTTCTTTTGAAAAACTGATTAATCGGACAAAAATAAAAATAGAGTCCCATTCTACATGTCAATATCAATACCGGCAACAATGAAATTTAAAGTAAAAGGAAAATCCGTCAACTTTAAAAATCGGGAGGGTTCAAGTCCTCTTTTCCCCCAA
>HD05
AATCACTGACTAGCTGCTATTGAGCCCCATCTACAAATGGATAATTCTGTCTTAGTAGAGACGAGTTTTTGAAAATAACGGAGAAATACCGACTCTCTTGCAAGAGAGTCGGTATTTCTCCGTTATTTTTTATGTTTTTCTTTAATAGTTTTTTATTTCTATCTTTTTTTTACGAACAGTATTTTTATGCTTTTGCTTTTATTTTGTCTGATATTTTTGTTATGGTTATGGGCTCATATTCGTTATGTACCAGTATAATAATATTAGTTATTTGTTAATCCCACTAATAAAGTTCTAATTTTATTAATTCGATTCTAATTTTCGAATTTTTTAGTTTTTTTAATATAAAATAAAAGAAAAGAGAAAGTTGTAATTTTATGCCTCTTAAAACTTCATTTCTATTTTAAATGGTAGAAATTGAAACCTTTTTATTAAATATTTTATTAAATACAAATAAAAAAAATTTTAAATCTTGGAGGAAGGGGGGGCGGATGTAGCCAAGTGGATCAAGGCAGTGGATTGTGAATCCACCATGAACGAGGACCCCTATGGCTGAGCTGGTATGGACCTTACTTAAGTGATAACTTTTCAAATTCAGAGAAACCCTGGAATCAAAAATGGGCAATCCTGAGCCAAATCCTGTTTTACAAGAACAAACAAGGGTTCAGAAAGCGAAAAAAAAAAAAGGGGGATAGGGGCAAAAACTCAACGGAAGCTGTTCTAAAAAATGGGGTTGACTGCCTTTTTTGGTAAAAAAAGGAAAAAAAATCCTTCTATCGAATATCGAAACTCCATAAAGGATGAAGGATAAGCGTATATACACTATGTATACACAATGAAAAACTATCTCAAAAATGACAACCGAATCCGTATTTTTTTTTATGAAAAAAAAAAAAATTGTTATGAATCAATTCCAAGTTGAAAAAAAAATCGAATATTCTTTGATCAAATCATTCCCTCCATAGTCTGATCGATCTTTTCTTTTGAAAAACTGATTAATCGGACAAAAATAAAAATAGAGTCCCATTCTACATGTCAATATCAATACCGGCAACAATGAAATTTAAAGTAAAAGGAAAATCCGTCGACTTTAAAAATCGGGAGGGTTCAAGTCCTTTTTTTCCCCAAA
>HD06
AATCACTGACTAGCTGCTATTGAGCCCCATCTACAAATGGATAATTCTGTCTTAGTAGAGACGAGTTTTTGAAAATAACGGAGAAATACCGACTCTCTTGCAAGAGAGTCGGTATTTCTCCGTTATTTTTTATGTTTTTCTTTAGTAGTTTTTTATTTCTATCTTTTTTTTGGAAAAGTATTTTTATGCTTTTGCTTTTATTTTGTCTGATATTTTTGTTATGGTTATGGGCTCATATTCGTTATGTACCAGTATAATAATATTAGTTATTTGTTAATCCCACTAATAAAGTTCTAATTTTATTAATTCGATTCTAATTTTCGAATTTTTTAGTTTTTTTAATATAAAATAAAAGAAAAGAGAAAGTTGTAATTTTATGCCTCTTAAAACTTCATTTCTATTTTAAATGGTAGAAATTGAAACCTTTTTATTAAATATTTTATTAAATACAAATAAAAAAAATTTTAAATCTTGGAGGAAGGGGGGGCGGATGTAGCCAAGTGGATCAAGGCAGTGGATTGTGAATCCCCCATGACCGACGACTATGGCATGAGCTGGTTGGAACCTACTTAAGTGATAACTTTCAAATTCAGAGAAACCCTGGAATCAAAAATGGGCAATCCTGAGCCAAATCCTGTTTTACAAGAACAAACAAGGGTTCAGAAAGCGAAAAAAAAAAAAGGGGGATAGGGGCAAAAACTCAACGGAAGCTGTTCTAAAAAATGGGGTTGACTGCCTTTTTTGGTAAAAAAAGGAAAAAAAATCCTTCTATCGAATATCGAAACTCCATAAAGGATGAAGGATAAGCGTATATACACTATGTATACACAATGAAAAACTATCTCAAAAATGACAACCGAATCCGTATTTTTTTTTATGAAAAAAAAAAAAATTGTTATGAATCAATTCCAAGTTGAAAAAAAAATCGAATATTCTTTGATCAAATCATTCACTCCATAGTCTGATCGATCTTTTCTTTTGAAAAACTGATTAATCGGACAAAAATAAAGATAGAGTCCCATTCTACATGTCAATATCAATACCGGCAACAATGAAATTTAGAGTAAGAGGAAAATCCGTCGACTTTAGAAATCGTGAGGGTTCAAGTCTTCTTTATTCCCCA
>HD07
TCGCTGACTAGCTGCTATTGAGCCCCATCTACAAATGGATAATTCTGTCTTAGTAGAGACGAGTTTTTGAAAATAACGGAGAAATACCGACTCTCTTGCAAGAGAGTCGGTATTTCTCCGTTATTTTTTATGTTTTTCTTTAATAGTTTTTTATTTCTATCTTTTTTTTACGAAAAGTATTTTTATGCTTTTGCTTTTATTTTGTCTGATATTTTTGTTATGGTTATGGGCTCATATTCGTTATGTACCAGTATAATAATATTAGTTATTTGTTAATCCCACTAATAAAGTTCTAATTTTATTAATTCGATTCTAATTTTCGAATTTTTTAGTTTTTTTAATATAAAATAAAAGAAAAGAGAAAGTTGTAATTTTATGCCTCTTAAAACTTCATTTCTATTTTAAATGGTAGAAATTGAAACCTTTTTATTAAAAATTTTATTAAATACAAATAAAAAAAATTTTAAATCTTGGAGGAAGGGGGGGCGGATGTAGCCCAGTGGATCAAGGCAGTGGATTGTGAATCCCCCATCAGCGAGGAGCCTTGCATGAGCTTGGTATGGACCTACTAAGTGATAACTTTCAAATTCAGAGAAACCCTGGAATCAAAAATGGGCAATCCTGAGCCAAATCCTGTTTTACAAGAACAAACAAGGGTTCAGAAAGCGAAAAAAAAAAAAGGGGGATAGGGGCAAAAACTCAACGGAAGCTGTTCTAAAAAAGGGGGTTGACTGCCTTTTTTGGTAAAAAAAGGAAAAAAAATCCTTCTATCGAATATCGAAACTCCATAAAGGATGAAGGATAAGCGTATATACCCTATGTATACACAATGAAAAACTATCTCAAAAATGACAACCGAATCCGTATTTTTTTTTATGAAAAAAAAAAAAATTGTTATGAATCAATTCCAAGTTGAAAAAAAAATCAAATATTCTTTGATCAAATCATTCCCTCCATAGTCTGATCGATCTTTTCTTTTGAAAAACTGATTAATCGGACAAAAATAAAAATAGAGTCCCATTCTACATGTCAATATCAATACCGGCAACAATGAAATTTAAAGTAAAAGGAAAATCCGTCAACTTTAAAAATCGGGAGGGTTCAAGTCCTTCTTTCCCCCAA
>HD08
ATCGTCTGACTAGCTGCTATTGAGCCCCATCTACAAATGGATAATTCTGTCTTAGTAGAGACGAGTTTTTGAAAATAACGGAGAAATACCGACTCTCTTGCAAGAGAGTCGGTATTTCTCCGTTATTTTTTATGTTTTTCTTTAGTAGTTTTTTATTTCTATCTTTTTTTTACGGGAAGTATTTTTATGCTTTTGCTTTTATTTTGTCTGATATTTTTGTTATGGTTATGGGCTCATATTCGTTATGTACCAGTATAATAATATTAGTTATTTGTTAATCCCACTAATAAAGTTCTAATTTTATTAATTCGATTCTAATTTTCGAATTTTTTAGTTTTTTTAATATAAAATAAAAGAAAAGAGAAAGTTGTAATTTTATGCCTCTTAAAACTTCATTTCTATTTTAAATGGTAGAAATTGAAACCTTTTTATTAAAAATTTTATTAAATACAAATAAAAAAAATTTTAAATCTTGGAGGAAGGGGGGGCGGATGTAGCCAAGTGGATCAAGGCAGTGGATTGTGTATCCCCCATGAGCGAGGAATATGGCTGAGCTGGTATGGACCTACTTAAGTGATAACTTTCAAATTCAGAAGAAACCCTGGAATCAAAAATGGGCAATCCTGAGCCAAATCCTGTTTTACAAGAACAAACAAGGGTTCAGAAAGCGAAAAAAAAAAAAGGGGGATAGGGGCAAAAACTCAACGGAAGCTGTTCTAAAAAATGGGGTTGACTGCCTTTTTTGGTAAAAAAAGGAAAAAAAATCCTTCTATCGAATATCGAAACTCCATAAAGGATGAAGGATAAGCGTATATACCCTATGTATACCCAATGAAAAACTATCTCAAAAATGACAACCGAATCCGTATTTTTTTTTATGAAAAAAAAAAAAATTGTTATGAATCAATTCCAAGTTGAAAAAAAAATCAAATATTCTTTGATCAAATCATTCCCTCCATAGTCTGATCGATCTTTTCTTTTGAAAAACTGATTAATCGGACAAAAATAAAAATAAAGTCCCATTCTACATGTCAATATCAATACCGGCAACAATGAAATTTAAAGTAAAAGGAAAATCCGTCAACTTTAAAAATCGGGAGGGTTCAAGTCCTTTTTATCCCCAAA
>HD09
ATCATCTGACTAGCTGCTATTGAGCCCCATCTACAAATGGATAATTCTGTCTTAGTAGAGACGAGTTTTTGAAAATAACGGAGAAATACCGACTCTCTTGCAAGAGAGTCGGTATTTCTCAGTTATTTTTTATGTTTTTCTTTAGTAGTTTTTTATTTCTATCTTTTTTTTACGGGCAGTATTTTTATGCTTTTGCTTTTATTTTGTCTGATATTTTTGTTATGGTTATGGGCTCATATTCGTTATGTACCAGTATAATAATATTAGTTATTTGTTAATCCCACTAATAAAGTTCTAATTTTATTAATTCGATTCTAATTTTCGAATTTTTTAGTTTTTTTAATATAAAATAAAAGAAAAGAGAAAGTTGTAATTTTATGCCTCTTAAATCTTCATTTCTATTTTAAATGGTAGAAATTGAAACCTTTTTATTAAATATTTTATTAAATACAAATAAAAAAAATTTTAAATCTTGGAGGAAGGGGGGGCGGATGTAGCCAAGTGGATCAAGGCGGTGGATTGTGAATCCCCCATGAGCGACGAATCTCTATGATGAGCTTGGTTGGACCTACTAAGTGATAACTTTCAAATTCAGAGAAACCCTGGAATCAAAAATGGGCAATCCTGAGCCAAATCCTGTTTTACAAGAACAAACAAGGGTTCAGAAAGCGAAAAAAAAAAAAGGGGGATAGGGGCAAAAACTCAACGGAAGCTGTTCTAAAAAATGGGGTTGACTGCCTTTTTTGGTAAAAAAAGGAAAAAAAATCCTTCTATCGAATATCGAAACTCCATAAAGGATGAAGGATAAGCGTATATACACTATGTATACACAATGAAAAACTATCTCAAAAATGACAACCGAATCCGTATTTTTTTTTATGAAAAAAAAAAAAATTGTTATGAATCAATTCCAAGTTGAAAAAAAAATCGAATATTCTTTGATCAAATCATTCCCTCCATAGTCTGATCGATCTTTTCTTTTGAAAAACTGATTAATCGGACAAAAATAAAAATAGAGTCCCATTCTACATGTCAATATCAATACCGGCAACAATGAAATTTAAAGTAAAAGGAAAATCCGTCAACTTTAAAAATCGGGAGGGTTCAAGTCCTTCTTTTCCCCAA
>HD10
TCACTGACTAGCTGCTATTGAGCCCCATCTACAAATGGATAATTCTGTCTTAGTAGAGACGAGTTTTTGAAAATAACGGAGAAATACCGACTCTCTTGCAAGAGAGTCGGTATTTCTCAGTTATTTTTTATGTTTTTCTTTAACAGTTTTTTATTTCTATCTTTTTTTTGGGGCAGTATTTTTAGCCTTTTGCTTTTATTTTGTCTGATATTTTTGTTATGGTTAAGGGCTCATATTCGTTATGTACCAGTATAATAATATTAGTTATTTGTTAATCCCACTAATAAAGTTCTAATTTTATTAATTCGATTCTAATTTTCGAATTTTTTAGTTTTTTTAATATAAAATAAAAGAAAAGAGAAAGTTGTAATTTTATGCCTCTTAAAACTTCATTTCTATTTTAAATGGTAGAAATTGAAACCTTTTTATTAAATATTTTATTAAATAGAAATAAAAAAAATTTTAAATCGTGGAGGAAGGGGGGGCGGATGTAGCCAAGTGGATCAAGGCAGTGGATTGTGAATCCCACAAGACCGAAGAGCATCTTTGATGAGCTTGGTTGGAACCTACTAAGTGATAACTTTCAAATTCAGAGAAACCCTGGAATCAAAAATGGGCAATCCTGAGCCAAATCCTGTTTTACAAGAACAAACAAGGGTTCAGAAAGCGAAAAAAAAAAAAGGGGGATAGGGGCAAAAACTCAACGGAAGCTGTTCTAAAAAATGGGGTTGACTGCCTTTTTTGGTAAAAAAAGGAAAAAAAATCCTTCTATCGAATATCGAAACTCCATAAAGGATGAAGGATAAGCGTATATACCCTATGTATACACAATGAAAAACTATCTCAAAAATGACAACCGAATCCGTATTTTTTTTTATGAAAAAAAAAAAAATTGTTATGAATCAATTCCAAGTTGAAAAAAAAATCAAATATTCTTTGATCAAATCATTCCCTCCATAGTCTGATCGATCTTTTCTTTTGAAAAACTGATTAATCGGACAAAAATAAAAATAGAGTCCCATTCTACATGTCAATATCAATACCGGCAACAATGAAATTTAAAGTAAAAGGAAAATCCGTCAACTTTAAAAATCGGGAGGGTTCAAGTCCTTCTTTTCCCCAA
>HD11
ATCGCTGACTAGCTGCTATTGAGCCCCATCTACAAATGGATAATTCTGTCTTAGTAGAGACGAGTTTTTGAAAATAACGGAGAAATACCGACTCTCTTGCAAGAGAGTCGGTATTTCTCCGTTATTTTTTATGTTTTTCTTTAGTAGTTTTTTATTTCTATCTTTTTTTTACGAAAAGTATTTTTATGCTTTTGCTTTTATTTTGTCTGATATTTTTGTTATGGTTATGAGCTCATATTCGTTATGTACCAGTATAATAATATTAGTTATTTGTTAATCCCACTAATAAAGTTCTAATTTTATTAATTCGATTCTAATTTTCGAATTTTTTAGTTTTTTTAATATAAAATAAAAGAAAAGAGAAAGTTGTAATTTTATGCCTCTTAAATCTTCATTTCTATTTTAAATGGTAGAAATTGAAACCTTTTTATTAAATATTTTATTAAATACAAATAAAAAAAATTTTAAATCTTGGAGGAAGGGGGGGCGGATGTAGCCAAGTGGATCAAGGCGGTGGATTGTGTATCCCCCATCACCGAGGACCTATGCATGAGCTGGTATGGAACCTTACTTAAGTGATAACTTTCAAATTCAGAAGAAACCCTGGAATCAAAAATGGGCAATCCTGAGCCAAATCCTGTTTTACAAGAACAAACAAGGGTTCAGAAAGCGAAAAAAAAAAAAGGGGGATAGGGGCAAAAACTCAACGGAAGCTGTTCTAAAAAATGGGGTTGACTGCCTTTTTTGGTAAAAAAAGGAAAAAAAATCCTTCTATCGAATATCGAAACTCCATAAAGGATGAAGGATAAGCGTATATACCCTATGTATACACAATGAAAAACTATCTCAAAAATGACAACCGAATCCGTATTTTTTTTTATGAAAAAAAAAAAAATTGTTATGAATCAATTCCAAGTTGAAAAAAAAATCGAATATTCTTTGATCAAATCATTCCCTCCATAGTCTGATCGATCTTTTCTTTTGAAAAACTGATTAATCGGACAAAAATAAAAATAGAGTCCCATTCTACATGTCAATATCAATACCGGCAACAATGAAATTTAAAGTAAAAGGAAAATCCGTCAACTTTAAAAATCGGGAGGGTTCAAGTCCTTTTTATCCCCCAAA
>HD12
AATCTCTGACTAGCTGCTATTGAGCCCCATCTACAAATGGATAATTCTGTCTTAGTAGAGACGAGTTTTTGAAAATAACGGAGAAATACCGACTCTCTTGCAAGAGAGTCGGTATTTCTCCGTTATTTTTTATGTTTTTCTTTAATAGTTTTTTATTTCTATCTTTTTTTTACGAAAAGTATTTTTATGCTTTTGCTTTTATTTTGTCTGATATTTTTGTTATGGTTATGGGCTCATATTCGTTATGTACCAGTATAATAATATTAGTTATTTGTTAATCCCACTAATAAAGTTCTAATTTTATTAATTCGATTCTAATTTTCGAATTTTTTAGTTTTTTTAATATAAAATAAAAGAAAAGAGAAAGTTGTAATTTTATGCCTCTTAAAACTTCATTTCTATTTTAAATGGTAGAAATTGAAACCTTTTTATTAAATATTTTATTAAATACAAATAAAAAAAATTTTAAATCTTGGAGGAAGGGGGGGCGGATGTAGCCAAGTGGATCAAGGCGGTGGATTGTGAATCCCCCATGACCGAAGACCCCTTGCATGGCCTGGTTGGAACCTTACTTAAGTGATAACTTTCAAATTCAGAAGAAACCCTGGAATCAAAAATGGGCAATCCTGAGCCAAATCCTGTTTTACAAGAACAAACAAGGGTTCAGAAAGCGAAAAAAAAAAAAGGGGGATAGGGGCAAAGACTCAACGGAAGCTGTTCTAAAAAATGGGGTTGACTGCCTTTTTTGGTAAAAAAAGGAAAAAAAATCCTTCTATCGAATATCGAAACTCCATAAAGGATGAAGGATAAGCGTATATACACTATGTATACACAATGAAAAACTATCTCAAAAATGACAACCGAATCCGTATTTTTTTTTATGAAAAAAAAAAAAATTGTTATGAATCAATTCCAAGTTGAAAAAAAAATCGAATATTCTTTGATCAAATCATTCACTCCATAGTCTGATCGATCTTTTCTTTTGAAAAACTGATTAATCGGACAAAAATAAAAATAGAGTCCCATTCTACATGTCAATATCAATACCGGCAACAATGAAATTTAAAGTAAAAGGAAAATCCGTCAACTTTAAAAATCGGGAGGGTTCAAGTCCTTTTTATCCCCCAA
>HD13
ATCCTCTGACTAGCTGCTATTGAGCCCCATCTACAAATGGATAATTCTGTCTTAGTAGAGACGAGTTTTTGAAAATAACGGAGAAATACCGACTCTCTTGCAAGAGAGTCGGTATTTCTCCGTTATTTTTTATGTTTTTCTTTAGTAGTTTTTTATTTCTATCTTTTTTTTACGAAAAGTATTTTTATGCTTTTGCTTTTATTTTGTCTGATATTTTTGTTATGGTTATGGGCTCATATTCGTTATGTACCAGTATAATAATATTAGTTATTTGTTAATCCCACTAATAAAGTTCTAATTTTATTAATTCGATTCTAATTTTCGAATTTTTTAGTTTTTTTAATATAAAATAAAAGAAAAGAGAAAGTTGTAATTTTATGCCTCTTAAAACTTCATTTCTATTTTAAATGGTAGAAATTGAAACCTTTTTATTAAATATTTTATTAAATACAAATAAAAAAAATTTTAAATCTTGGAGGAAGGGGGGGCGGATGTAGCCAAGTGGATCAAGGCAGTGGATTGTGAATCCCCCATAAAGCGAGGAATTTGCTGGCTGGTTGGAACCTTACTTAAGTGATAACTTTCAAATTCAGAGAAACCCTGGAATCAAAAATGGGCAATCCTGAGCCAAATCCTGTTTTACAAGAACAAACAAGGGTTCAGAAAGCGAAAAAAAAAAAAGGGGGATAGGGGCAAAAACTCAACGGAAGCTGTTCTAAAAAATGGGGTTGACTGCCTTTTTTGGTAAAAAAAGGAAAAAAAATCCTTCTATCGAATATCGAAACTCCATAAAGGATGAAGGATAAGCGTATATACCCTATGTATACCCAATGAAAAACTATCTCAAAAATGACAACCGAATCCGTATTTTTTTTTATGAAAAAAAAAAAAATTGTTATGAATCAATTCCAAGTTGAAAAAAAAATCAAATATTCTTTGATCAAATCATTCCCTCCATAGTCTGATCGATCTTTTCTTTTGAAAAACTGATTAATCGGACAAAAATAAAAATAAAGTCCCATTCTACATGTCAATATCAATACCGGCAACAATGAAATTTAAAGTAAAAGGAAAATCCGTCAACTTTAAAAATCGGGAGGGTTCAAGTCCTCTTTTCCCCAAA
>HD14
ATCACTGACTAGCTGCTATTGAGCCCCATCTACAAATGGATAATTCTGTCTTAGTAGAGACGAGTTTTTGAAAATAACGGAGAAATACCGACTCTCTTGCAAGAGAGTCGGTATTTCTCCGTTATTTTTTATGTTTTTCCTCAGTAGTTTTTTATTTCTATCTTTTTTTAACGAGAAGTATTTTTAGGCTTTTGCTTTTATTTTGTCTGATATTTTTGTTATGGTTATGGGCTCATATTCGTTATGTACCAGTATAATAATATTAGTTATTTGTTAATCCCACTAATAAAGTTCTAATTTTATTAATTCGATTCTAATTTTCGAATTTTTTAGTTTTTTTAATATAAAATAAAAGAAAAGAGAAAGTTGTAATTTTATGCCTCTTAAAAATTCATTTCTATTTTAAATGGTAGAAATTGAAACCTTTTTATTAAAAATTTTATTAAATACAAATAAAAAAAATTTTATTTCTTGGAGGGGGGGGGGGCGGATGTAGCCAAGTGGATCAAGGCGGTGGATTGTGTATCCCCCAAGACCGACGAATTGCATGGCTTGGTATGGAACCTTACTTAAGTGATAACTTTCAAATTCAGAAGAAACCCTGGAATCAAAAATGGGCAATCCTGAGCCAAATCCTGTTTTACAAGAACAAACAAGGGTTCAGAAAGCGAAAAAAAAAAAAGGGGGATAGGGGCAAAAACTCAACGGAAGCTGTTCTAAAAAATGGGGTTGACTGCCTTTTTTGGTAAAAAAAGGAAAAAAAATCCTTCTATCGAATATCGAAACTCCATAAAGGATGAAGGATAAGCGTATATACACTATGTATACCCAATGAAAAACTATCTCAAAAATGACAACCGAATCCGTATTTTTTTTTATGAAAAAAAAAAAAATTGTTATGAATCAATTCCAAGTTGAAAAAAAAATCGAATATTCTTTGATCAAATCATTCCCTCCATAGTCTGATCGATCTTTTCTTTTGAAAAACTGATTAATCGGACAAAAATAAAAATAGAGTCCCATTCTACATGTCAATATCAATACCGGCAACAATGAAATTTAAAGTAAAAGGAAAATCCGTCAACTTTAAAAATCGGGAGGGTTCAAGTCCTTTTTATCCCCAAA
>HD15
ATCCTCTGACTAGCTGCTATTGAGCCCCATCTACAAATGGATAATTCTGTCTTAGTAGAGACGAGTTTTTGAAAATAACGGAGAAATACCGACTCTCTTGCAAGAGAGTCGGTATTTCTCCGTTATTTTTTATGTTTTTCTTTAGTAGTTTTTTATTTCTATCTTTTTTTTACGAAAAGTATTTTTATGCTTTTGCTTTTATTTTGTCTGATATTTTTGTTATGGTTATGAGCTCATATTCGTTATGTACCAGTATAATAATATTAGTTATTTGTTAATCCCACTAATAAAGTTCTAATTTTATTAATTCGATTCTAATTTTCGAATTTTTTAGTTTTTTTAATATAAAATAAAAGAAAAGAGAAAGTTGTAATTTTATGCCTCTTAAATCTTCATTTCTATTTTAAATGGTAGAAATTGAAACCTTTTTATTAAATATTTTATTAAATACAAATAAAAAAAATTTTAAATCTTGGAGGAAGGGGGGGCGGATGTAGCCAAGTGGATCAAGGCAGTGGATTGTTAATCCCCCATCACCGAGGAAATTTGCCTGAGCTTGGTTGGAACCTTACTTAAGTGATAACTTTCAATTCAGAGAAACCCTGGAATCAAAAATGGGCAATCCTGAGCCAAATCCTGTTTTACAAGAACAAACAAGGGTTCAGAAAGCGAAAAAAAAAAAAGGGGGATAGGTGCAAAAACTCAACGGAAGCTGTTCTAAAAAATGGGGTTGACTGCCTTTTTTGGTAAAAAAAGGAAAAAAAATCCTTCTATCGAATATCGAAACTCCATAAAGGATGAAGGATAAGCGTATATACACTATGTATACACAATGAAAAACTATCTCAAAAATGACAACCGAATCCGTATTTTTTTTTATGAAAAAAAAAAAAATTGTTATGAATCAATTCCAAGTTGAAAAAAAAATCGAATATTCTTTGATCAAATCATTCACTCCATAGTCTGATCGATCTTTTCTTTTGAAAAACTGATTAATCGGACAAAAATAAAAATAGAGTCCCATTCTACATGTCAATATCAATACCGGCAACAATGAAATTTAAAGTAAAAGGAAAATCCGTCAACTTTAAAAATCGGGAGGGTTCAAGTCCTTTTTATCCCCCAA
>HD16
AGTCACTGACTAGCTGCTATTGAGCCCCATCTACAAATGGATAATTCTGTCTTAGTAGAGACGAGTTTTTGAAAATAACGGAGAAATACCGACTCTCTTGCAAGAGAGTCGGTATTTCTCCGTTATTTTTTATGTTTTTCCTCAATAGTTTTTTATTTCTATCTTTTTTTTACGGGAAGTATTTTTAGGCTTTTGCTTTTATTTTGTCTGATATTTTTGTTATGGTTATGGGCTCATATTCGTTATGTACCAGTATAATAATATTAGTTATTTGTTAATCCCACTAATAAAGTTCTAATTTTATTAATTCGATTCTAATTTTCGAATTTTTTAGTTTTTTTAATATAAAATAAAAGAAAAGAGAAAGTTGTAATTTTATGCCTCTTAAAACTTCATTTCTATTTTAAATGGGAGAAATTGAAACCTTTTTATTAAAAATTTTATTAAATACAAATAAAAAAAATTTTATATCTTGGAGGAAGGGGGGGCGGATGTAGCCAAGTGGATCAAGGCAGTGGATTGTTAATCCCCCAACAAACGAGGGACCCTTTGCCTGAGCTTGGTTGGAACCTTACTTAAGTGATAACTTTCAATTCAGAGAAACCCTGGAATCAAAAATGGGCAATCCTGAGCCAAATCCTGTTTTACAAGAACAAACAAGGGTTCAGAAAGCGAAAAAAAAAAAAGGGGGATAGGTGCAAAAACTCAACGGAAGCTGTTCTAAAAAATGGGGTTGACTGCCTTTTTTGGTAAAAAAAGGAAAAAAAATCCTTCTATCGAATATCGAAACTCCATAAAGGATGAAGGATAAGCGTATATACACTATGTATACACAATGAAAAACTATCTCAAAAATGACAACCGAATCCGTATTTTTTTTTATGAAAAAAAAAAAAATTGTTATGAATCAATTCCAAGTTGAAAAAAAAATCGAATATTCTTTGATCAAATCATTCACTCCATAGTCTGATCGATCTTTTCTTTTGAAAAACTGATTAATCGGACAAAAATAAAAATAGAGTCCCATTCTACATGTCAATATCAATACCGGCAACAATGAAATTTAAAGTAAAAGGAAAATCCGTCAACTTTAAAAATCGGGAGGGTTCAAGTCCTTTTTATCCCCCAA
>HD17
ATTCTCTGGACTAGCTGCTATTGAGCCCCATCTACAAATGGATAATTCTGTCTTAGTAGAGACGAGTTTTTGAAAATAACGGAGAAATACCGACTCTCTTGCAAGAGAGTCGGTATTTCTCCGTTATTTTTTATGTTTTTCTTTAGTAGTTTTTTATTTCTATCTTTTTTTTACGGGCAGTATTTTTATGCTTTTGCTTTTATTTTGTCTGATATTTTTGTTATGGTTATGGGCTCATATTCGTTATGTACCAGTATAATAATATTAGTTATTTGTTAATCCCACTAATAAAGTTCTAATTTTATTAATTCGATTCTAATTTTCGAATTTTTTAGTTTTTTTAATATAAAATAAAAGAAAAGAGAAAGTTGTAATTTTATGCCTCTTAAAACTTCATTTCTATTTTAAATGGTAGAAATTGAAACCTTTTTATTAAATATTTTATTAAATACAAATAAAAAAAATTTTAATTCTTGGAGGAAGGGGGGGCGGATGTAGCCAAGTGGATCAAGGCAGTGGATTGTGTATCCACCAAAACACGAGGGAACCGCCTAGCATGAGCTGGTTGGAACCTACTAAGTGATAACTTTCAAATTCAGAGAAACCCTGGAATCAAAAATGGGCAATCCTGAGCCAAATCCTGTTTTACAAGAACAAACAAGGGTTCAGAAAGCGAAAAAAAAAAAAGGGGGATAGGGGCAAAAACTCAACGGAAGCTGTTCTAAAAAAGGGGGTTGACTGCCTTTTTTGGTAAAAAAAGGAAAAAAAATCCTTCTATCGAATATCGAAACTCCATAAAGGATGAAGGATAAGCGTATATACACTATGTATACACAATGAAAAACTATCTCAAAAATGACAACCGAATCCGTATTTTTTTTTATGAAAAAAAAAAAAATTGTTATGAATCAATTCCAAGTTGAAAAAAAAATCGAATATTCTTTGATCAAATCATTCACTCCATAGTCTGATCGATCTTTTCTTTTGAAAAACTGATTAATCGGACAAAAATAAAGATAGAGTCCCATTCTACATGTCAATATCAATACCGGCAACAATGAAATTTAAAGTAAGAGGAAAATCCGTCGACTTTAAAAATCGTGAGGGTTCAAGTCCCTCCTATCCCA
>HD18
ATCATCTGACTAGCTGCTATTGAGCCCCATCTACAAATGGATAATTCTGTCTTAGTAGAGACGAGTTTTTGAAAATAACGGAGAAATACCGACTCTCTTGCAAGAGAGTCGGTATTTCTCCGTTATTTTTTATGTTTTTCTTTAATAGTTTTTTATTTCTATCTTTTTTTTACGGGCAGTATTTTTATGCTTTTGCTTTTATTTTGTCTGATATTTTTGTTATGGTTATGGGCTCATATTCGTTATGTACCAGTATAATAATATTAGTTATTTGTTAATCCCACTAATAAAGTTCTAATTTTATTAATTCGATTCTAATTTTCGAATTTTTTAGTTTTTTTAATATAAAATAAAAGAAAAGAGAAAGTTGTAATTTTATGCCTCTTAAATCTTCATTTCTATTTTAAATGGTAGAAATTGAAACCTTTTTATTAAATATTTTATTAAATACAAATAAAAAAAATTTTAAATCGTGGAGGAAGGGGGGGCGGATGTAGCCAAGTGGATCAAGGCGGTGGATTGTGAATCCACCATCCACGACGAAGCCTAGCATGAGCTGGTTGGAACCTACTAAGTGATAACTTTCAAATTCAGAGAAACCCTGGAATCAAAAATGGGCAATCCTGAGCCAAATCCTGTTTTACAAGAACAAACAAGGGTTCAGAAAGCGAAAAAAAAAAAAGGGGGATAGGGGCAAAAACTCAACGGAAGCTGTTCTAAAAAAGGGGGTTGACTGCCTTTTTTGGTAAAAAAAGGAAAAAAAATCCTTCTATCGAATATCGAAACTCCATAAAGGATGAAGGATAAGCGTATATACACTATGTATACACAATGAAAAACTATCTCAAAAATGACAACCGAATCCGTATTTTTTTTTATGAAAAAAAAAAAAATTGTTATGAATCAATTCCAAGTTGAAAAAAAAATCGAATATTCTTTGATCAAATCATTCACTCCATAGTCTGATCGATCTTTTCTTTTGAAAAACTGATTAATCGGACAAAAATAAAGATAGAGTCCCATTCTACATGTCAATATCAATACCGGCAACAATGAAATTTAAAGTAAGAGGAAAATCCGTCGACTTTAAAAATCGTGAGGGTTCAAGTCCCTCCTATCCCA
>HD19
AATTCGCTGGACTAGCTGCTATTGAGCCCCATCTACAAATGGATAATTCTGTCTTAGTAGAGACGAGTTTTTGAAAATAACGGAGAAATACCGACTCTCTTGCAAGAGAGTCGGTATTTCTCCGTTATTTTTTATGTTTTTCCTCAACAGTTTTTTATTTCTATCTTTTTTTTACGAGCAGTATTTTTAGCCTTTTGCTTTTATTTTGTCTGATATTTTTGTTATGGTTATGGGCTCATATTCGTTATGTACCAGTATAATAATATTAGTTATTTGTTAATCCCACTAATAAAGTTCTAATTTTATTAATTCGATTCTAATTTTCGAATTTTTTAGTTTTTTTAATATAAAATAAAAGAAAAGAGAAAGTTGTAATTTTATGCCTCTTAAATCTTCATTTCTATTTTAAATGGTAGAAATTGAAACCTTTTTTTTAAATATTTTATTCAATACAAATAAAAAAAATTTTATATCTTGGAGGAAGGGGGGGCGGATGTAGCCAAGTGGATCAAGGCAGTGGATTGTGTATCCCCCAAACGCGAGGAGCCTCAATGCATGAGCTGGTATGGAACCTACTAAGTGATAACTTTCAAATTCAGAGAAACCCTGGAATCAAAAATGGGCAATCCTGAGCCAAATCCTGTTTTACAAGAACAAACAAGGGTTCAGAAAGCGAAAAAAAAAAAAGGGGGATAGGGGCAAAAACTCAACGGAAGCTGTTCTAAAAAATGGGGTTGACTGCCTTTTTTGGTAAAAAAAGGAAAAAAAATCCTTCTATCGAATATCGAAACTCCATAAAGGATGAAGGATAAGCGTATATACACTATGTATACACAATGAAAAACTATCTCAAAAATGACAACCGAATCCGTATTTTTTTTTATGAAAAAAAAAAAAATTGTTATGAATCAATTCCAAGTTGAAAAAAAAATCGAATATTCATTGATCAAATCATTCCCTCCATAGTCTGATCGATCTTTTCTTTTGAAAAACTGATTAATCGGACAAAAATAAAAATAGAGTCCCATTCTACATGTCAATATCAATACCGGCAACAATGAAATTTAAAGTAAAAGGAAAATCCGTCAACTTTAAAAATCGGGAGGGTTCAAGTCCTTCTTTTCCCCAA
>HD20
AATTCTCTGACTAGCTGCTATTGAGCCCCATCTACAAATGGATAATTCTGTCTTAGTAGAGACGAGTTTTTGAAAATAACGGAGAAATACCGACTCTCTTGCAAGAGAGTCGGTATTTCTCCGTTATTTTTTATGTTTTTCTTTAGTAGTTTTTTATTTCTATCTTTTTTTTACGAAAAGTATTTTTATGCTTTTGCTTTTATTTTGTCTGATATTTTTGTTATGGTTATGAGCTCATATTCGTTATGTACCAGTATAATAATATTAGTTATTTGTTAATCCCACTAATAAAGTTCTAATTTTATTAATTCGATTCTAATTTTCGAATTTTTTAGTTTTTTTAATATAAAATAAAAGAAAAGAGAAAGTTGTAATTTTATGCCTCTTAAATCTTCATTTCTATTTTAAATGGTAGAAATTGAAACCTTTTTATTAAATATTTTATTAAATACAAATAAAAAAAATTTTAAATCGTGGAGGAAGGGGGGGCGGATGTAGCCAAGTGGATCAAGGCAGTGGATTGTGAATCCCCCAAAAGCGAGGAGATTGCATGACTTGGTATGGACCTTACTTAAGTGATAACTTTCAAATTCAGAGAAACCCTGGAATCAAAAATGGGCAATCCTGAGCCAAATCCTGTTTTACAAGAACAAACAAGGGTTCAGAAAGCGAAAAAAAAAAAAGGGGGATAGGGGCAAAAACTCAACGGAAGCTGTTCTAAAAAATGGGGTTGACTGCCTTTTTTGGTAAAAAAAGGAAAAAAAATCCTTCTATCGAATATCGAAACTCCATAAAGGATGAAGGATAAGCGTATATACCCTATGTATACCCAATGAAAAACTATCTCAAAAATGACAACCGAATCCGTATTTTTTTTTATGAAAAAAAAAAAAATTGTTATGAATCAATTCCAAGTTGAAAAAAAAATCAAATATTCTTTGATCAAATCATTCCCTCCATAGTCTGATCGATCTTTTCTTTTGAAAAACTGATTAATCGGACAAAAATAAAAATAGAGTCCCATTCTACATGTCAATATCAATACCGGCAACAATGAAATTTAAAGTAAAAGGAAAATCCGTCAACTTTAAAAATCGGGAGGGTTCAAGTCCTTCTTATTCCCCAA
>HD21
ATTCCTCTGACTAGCTGCTATTGAGCCCCATCTACAAATGGATAATTCTGTCTTAGTAGAGACGAGTTTTTGAAAATAACGGAGAAATACCGACTCTCTTGCAAGAGAGTCGGTATTTCTCCGTTATTTTTTATGTTTTTCTTTAGTAGTTTTTTATTTCTATCTTTTTTTTACGGGAAGTATTTTTATGCTTTTGCTTTTATTTTGTCTGATATTTTTGTTATGGTTATGAGCTCATATTCGTTATGTACCAGTATAATAATATTAGTTATTTGTTAATCCCACTAATAAAGTTCTAATTTTATTAATTCGATTCTAATTTTCGAATTTTTTAGTTTTTTTAATATAAAATAAAAGAAAAGAGAAAGTTGTAATTTTATGCCTCTTAAATCTTCATTTCTATTTTAAATGGTAGAAATTGAAACCTTTTTATTAAAAATTTTATTAAATACAAATAAAAAAAATTTTAAATCGTGGAGGAAGGGGGGGCGGATGTAGCCAAGTGGATCAAGGCAGTGGATTGTGTATCCCCCAAGACGCGAGGAAGAATGGATGGACTGGTTGGAACCTACTAAGTGATAACTTTCAAATTCAGAGAAACCCTGGAATCAAAAATGGGCAATCCTGAGCCAAATCCTGTTTTACAAGAACAAACAAGGGTTCAGAAAGCGAAAAAAAAAAAAGGGGGATAGGGGCAAAAACTCAACGGAAGCTGTTCTAAAAAATGGGGTTGACTGCCTTTTTTGGTAAAAAAAGGAAAAAAAATCCTTCTATCGAATATCGAAACTCCATAAAGGATGAAGGATAAGCGTATATACACTATGTATACACAATGAAAAACTATCTCAAAAATGACAACCGAATCCGTATTTTTTTTTATGAAAAAAAAAAAAATTGTTATGAATCAATTCCAAGTTGAAAAAAAAATCGAATATTCTTTGATCAAATCATTCACTCCATAGTCTGATCGATCTTTTCTTTTGAAAAACTGATTAATCGGACAAAAATAAAAATAGAGTCCCATTCTACATGTCAATATCAATACCGGCAACAATGAAATTTAAAGTAAAAGGAAAATCCGTCAACTTTAAAAATCGTGAGGGTTCAAGTCCCTCTATCCCCAA
>HD22
AGTCTCTGACTAGCTGCTATTGAGCCCCATCTACAAATGGATAATTCTGTCTTAGTAGAGACGAGTTTTTGAAAATAACGGAGAAATACCGACTCTCTTGCAAGAGAGTCGGTATTTCTCCGTTATTTTTTATGTTTCGCCTCAACAGTTTTTTATTTCTATCTTTTTTTTGGGGCAGTATTTTCAGCCTTTTGCTTAGGGAAGGTCTGATATTTTTGTTATGGTTATGGGCTCATATTCGTTATGTACCAGTATAATAATATTAGTTATTTGTTAATCCCACTAATAAAGTTCTAATTTTATTAATTCGATTCTAATTTTCGAATTTTTTAGTTTTTTTAATATAAAATAAAAGAAAAGAGAAAGTTGTAATTTTATGCCTCTTAAAACTTCATTTCTATTTTAAATGGTAGAAATTGAAACCTTTTTATTAAATAATTTATTAAATACAAATAAAAAAAATTTTATTTCTTGGAGGGGGGGGGGGCGGATGTAGCCAAGTGGAACAAGGCAGTGGATTGTGTATCCCACAAAACACGACGAATTGCTGGCTGGTTGGACCTACTTAAGTGATAACTTTCAAATTCAGAAGAAACCCTGGAATCAAAAATGGGCAATCCTGAGCCAAATCCTGTTTTACAAGAACAAACAAGGGTTCAGAAAGCGAAAAAAAAAAAAGGGGGATAGGGGCAAAAACTCAACGGAAGCTGTTCTAAAAAATGGGGTTGACTGCCTTTTTTGGTAAAAAAAGGAAAAAAAATCCTTCTATCGAATATCGAAACTCCATAAAGGATGAAGGATAAGCGTATATACACTATGTATACACAATGAAAAACTATCTCAAAAATGACAACCGAATCCGTATTTTTTTTTATGAAAAAAAAAAAAATTGTTATGAATCAATTCCAAGTTGAAAAAAAAATCGAATATTCTTTGATCAAATCATTCCCTCCATAGTCTGATCGATCTTTTCTTTTGAAAAACTGATTAATCGGACAAAAATAAAAATAGAGTCCCATTCTACATGTCAATATCAATACCGGCAACAATGAAATTTAAAGTAAAAGGAAAATCCGTCAACTTTAAAAATCGGGAGGGTTCAAGTCCTTTTTTTCCCCAAA
>HD23
ATTCCTGACTAGCTGCTATTGAGCCCCATCTACAAATGGATAATTCTGTCTTAGTAGAGACGAGTTTTTGAAAATAACGGAGAAATACCGACTCTCTTGCAAGAGAGTCGGTATTTCTCCGTTATTTTTTATGTTTTTCTTTAGTAGTTTTTTATTTCTATCTTTTTTTTACGGGCAGTATTTTTATGCTTTTGCTTTTATTTTGTCTGATATTTTTGTTATGGTTATGGGCTCATATTCGTTATGTACCAGTATAATAATATTAGTTATTTGTTAATCCCACTAATAAAGTTCTAATTTTATTAATTCGATTCTAATTTTCGAATTTTTTAGTTTTTTTAATATAAAATAAAAGAAAAGAGAAAGTTGTAATTTTATGCCTCTTAAAACTTCATTTCTATTTTAAATGGTAGAAATTGAAACCTTTTTATTAAAAATTTTATTAAATACAAATAAAAAAAATTTTAAATCGTGGAGGAAGGGGGGGCGGATGTAGCCAAGTGGATCAAGGCGGTGGATTGTGTATCCCACAAACGCGAGGAAGCTATCCTGAGCTTGGTATGGACCTACTTAAGTGATAACTTTCAAATTCAGAGAAACCCTGGAATCAAAAATGGGCAATCCTGAGCCAAATCCTGTTTTACAAGAACAAACAAGGGTTCAGAAAGCGAAAAAAAAAAAAGGGGGATAGGGGCAAAAACTCAACGGAAGCTGTTCTAAAAAATGGGGTTGACTGCCTTTTTTGGTAAAAAAAGGAAAAAAAATCCTTCTATCGAATATCGAAACTCCATAAAGGATGAAGGATAAGCGTATATACCCTATGTATACCCAATGAAAAACTATCTCAAAAATGACAACCGAATCCGTATTTTTTTTTATGAAAAAAAAAAAAATTGTTATGAATCAATTCCAAGTTGAAAAAAAAATCGAATATTCTTTGATCAAATCATTCCCTCCATAGTCTGATCGATCTTTTCTTTTGAAAAACTGATTAATCGGACAAAAATAAAAATAGAGTCCCATTCTACATGTCAATATCAATACCGGCAACAATGAAATTTAAAGTAAAAGGAAAATCCGTCAACTTTAAAAATCGGGAGGGTTCAAGTCCTCTTTTCCCCCAAA
>HD24
AATTCCCTGACTAGCTGCTATTGAGCCCCATCTACAAATGGATAATTCTGTCTTAGTAGAGACGAGTTTTTGAAAATAACGGAGAAATACCGACTCTCTTGCAAGAGAGTCGGTATTTCTCCGTTATTTTTTATGTTTTTCTTTAACAGTTTTTTATTTCTATCTTTTTTTTGGGGCAGTATTTTCAGCCTTTTGCTTGGGAAGTTCTGATATTTTTGTTATGGTTATGGGCTCATATTCGTTATGTACCAGTATAATAATATTAGTTATTTGTTAATCCCACTAATAAAGTTCTAATTTTATTAATTCGATTCTAATTTTCGAATTTTTTAGTTTTTTTAATATAAAATAAAAGAAAAGAGAAAGTTGTAATTTTATGCCTCTTAAAACTTCATTTCTATTTTAAATGGTAGAAATTGAAACCTTTTTTTTAAAAATTTTATTCAATACAAATAAAAAAAATTTTATTTCTTGGAGGAAGGGGGGGCGGATGTGGTCAAGTGGAAAAAGGCAGTGGATTGTGTATCCCCAAACCACGAGGATATGATGAGCTTGGTTGGACCTACTTAAGTGATAACTTTCAAATTCAGAGAAACCCTGGAATCAAAAATGGGCAATCCTGAGCCAAATCCTGTTTTACAAGAACAAACAAGGGTTCAGAAAGCGAAAAAAAAAAAAGGGGGATAGGGGCAAAAACTCAACGGAAGCTGTTCTAAAAAATGGGGTTGACTGCCTTTTTTGGTAAAAAAAGGAAAAAAAATCCTTCTATCGAATATCGAAACTCCATAAAGGATGAAGGATAAGCGTATATACACTATGTATACACAATGAAAAACTATCTCAAAAATGACAACCGAATCCGTATTTTTTTTTATGAAAAAAAAAAAAATTGTTATGAATCAATTCCAAGTTGAAAAAAAAATCGAATATTCATTGATCAAATCATTCACTCCATAGTCTGATCGATCTTTTCTTTTGAAAAACTGATTAATCGGACAAAAATAAAAATAGAGTCCCATTCTACATGTCAATATCAATACCGGCAACAATGAAATTTAAAGTAAAAGGAAAATCCGTCAACTTTAAAAATCGGGAGGGTTCAAGTCCTTCTTATTCCCCAA
>HD25
AGTCACTGACTAGCTGCTATTGAGCCCCATCTACAAATGGATAATTCTGTCTTAGTAGAGACGAGTTTTTGAAAATAACGGAGAAATACCGACTCTCTTGCAAGAGAGTCGGTATTTCTCCGTTATTTTTTATGTTTTTCTTTAGTAGTTTTTTATTTCTATCTTTTTTTTGGGGCAGTATTTTTATGCTTTTGCTTTTATTTTGTCTGATATTTTTGTTATGGTTATGGGCTCATATTCGTTATGTACCAGTATAATAATATTAGTTATTTGTTAATCCCACTAATAAAGTTCTAATTTTATTAATTCGATTCTAATTTTCGAATTTTTTAGTTTTTTTAATATAAAATAAAAGAAAAGAGAAAGTTGTAATTTTATGCCTCTTAAAAAATCATTTCTATTTTAAATGGTAGAAATTGAAACCTTTTTATTAAAAATTTTATTAAATACAAATAAAAAAAATTTTATATCGTGGAGGAAGGGGGGGCGGATGTAGCCAAGTGGAACATTGCAGTGGATTGTTAATCCCCCACGACGCGAGGAGCATTACGTTCATGCATAACAATCATGCATGACTGGTTGGAACCTACTAAGTGATAACTTTCAAATTCAGAGAAACCCTGGAATCAAAAATGGGCAATCCTGAGCCAAATCCTGTTTTACAAGAACAAACAAGGGTTCAGAAAGCGAAAAAAAAAAAAGGGGGATAGGGGCAAAAACTCAACGGAAGCTGTTCTAAAAAATGGGGTTGACTGCCTTTTTTGGTAAAAAAAGGAAAAAAAATCCTTCTATCGAATATCGAAACTCCATAAAGGATGAAGGATAAGCGTATATACACTATGTATACACAATGAAAAACTATCTCAAAAATGACAACCGAATCCGTATTTTTTTTTATGAAAAAAAAAAAAATTGTTATGAATCAATTCCAAGTTGAAAAAAAAATCGAATATTCTTTGATCAAATCATTCACTCCATAGTCTGATCGATCTTTTCTTTTGAAAAACTGATTAATCGGACAAAAATAAAGATAGAGTCCCATTCTACATGTCAATATCAATACCGGCAACAATGAAATTTAAAGTAAAAGGAAAATCCGTCGACTTTAAAAATCGTGAGGGTTCAAGTCCCTCTTATCCCAAA
>JX01
ATCTCTGACTAGCTGCTATTGAGCCCCATCTACAAAAGGATAATTCTGTCTTAGTGGAGACGAAGTTTTTGAAAATAACGGTAGAAATACCGACTCTCTTGCAAGAGAGTCGGTATTTCTCCGTTATTTTTTATGTTTTTCTTTAGTAGTTTTTTATTTCTATCCTTTTTTTACGAAAAGTATTTTTATGCTTTTGCTTTGATTTTGTCTGATATTTTTGTTATGGTTATGGGCTCATATTCGTTATGTACCAGTATAATAATATTAGTTATTTGTTAATCCCACTAATAAAGTTCTAATTTTATTAATTCGATTCTAATTTTCGAATTTTTTAGTTTTTTTAATAGAAAATAAAAGAAAAGAGAAAGTTGTAATTTTATGCCTCTTAGATCTTCATTTCTATTTTAAATGGTAGAAATTGAAACCTTTTTATTAAATATTTTATTAAATAGAAATAAAAAAAATTTTAAATCGTGGAGGAAGGGGGGGCGGATGTAGCCAAGTGGATCAAGGCAGTGGATTGTGAATCCACCATGAGCGACGACCAATGGAATGAGCTTGGTATGGAACCTACTAAGTGATAACTTTCAAATTCAGAGAAACCCTGGAATCAAAAATGGGCAATCCTGAGCCAAATCCTGTTTTACAAGAACAAACAAGGGTTCAGAAAGCGAAAAAAAAAGAAGGGGATAGGTGCAGAGACTCAACGGAAGCTGTTCTAAGAAATGGGGTTGACTGCCTTTTTTGGTAAAGAAAGGAAAAGAAATCCTATCGAAACTCCATAAAGGATGAAGGATAAGCGTATATACACTATGTATACACAATGAAAAACTATCTCAAAAATGACAACCGAATCCGTATTTTTTTTATGAAAAAGAAAAGAATTGTTATGAATCAATTCCAAGTTGAAGAAAGAATCGAATATTCATTGATCAAATCATTCACTCCATAGTCTGATCGATCTTTTCTTTTGAAGAACTGATTAATCGGACAAGAATAAAGATAGAGTCCCATTCTACATGTCAATATCAATACCGGCAACAATGAAATTTAGAGTAAGAGGAAAATCCGTCGACTTTAGAAATCGTGAGGGTTCAAGTCCCTCTATCCCCAGCCAT
>JX02
ATCTCTGACTAGCTGCTATTGAGCCCCATCTACAAATGGATAATTCTGTCTTAGTGGAGACGAGTTTTTGAAAATAACGGAGAAATACCGACTCTCTTGCAAGAGAGTCGGTATTTCTCCGTTATTTTTTATGTTTTTCTTTAGTAGTTTTTTATTTCTATCCTTTTTTTACGAAAAGTATTTTTATGCTTTTGCTTTGATTTTGTCTGATATTTTTGTTATGGTTATGAGCTCATATTCGTTATGTACCAGTATAATAATATTAGTTATTTGTTAATCCCACTAATAAAGTTCTAATTTTATTAATTCGATTCTAATTTTCGAATTTTTTAGTTTTTTTAATAGAAAATAAAAGAAAAGAGAAAGTTGTAATTTTATGCCTCTTAGATCTTCATTTCTATTTTAAATGGTAGAAATTGAAACCTTTTTATTAAATATTTTATTAAATAGAAATAAAAAAAATTTTAAATCGTGGAGGAAGGGGGGGCGGATGTAGCCAAGTGGATCAAGGCAGTGGATTGTGAATCCACCATCAGCGACGAGCAATGGCATGAGCTTGGTATGGAACCTACTAAGTGATAACTTTCAAATTCAGAGAAACCCTGGAATCAAAAATGGGCAATCCTGAGCCAAATCCTGTTTTACAAGAACAAACAAGGGTTCAGAAAGCGAAAAAAAAAGAAGGGGATAGGTGCAGAGACTCAACGGAAGCTGTTCTAAGAAATGGGGTTGACTGCCTTTTTTGGTAAAGAAAGGAAAAGAAATCCTATCGAAACTCCATAAAGGATGAAGGATAAGCGTATATACACTATGTATACACAATGAAAAACTATCTCAAAAATGACAACCGAATCCGTATTTTTTTTATGAAAAAGAAAAGAATTGTTATGAATCAATTCCAAGTTGAAGAAAGAATCGAATATTCATTGATCAAATCATTCACTCCATAGTCTGATCGATCTTTTCTTTTGAAGAACTGATTAATCGGACAAGAATAAAGATAGAGTCCCATTCTACATGTCAATATCAATACCGGCAACAATGAAATTTAGAGTAAGAGGAAAATCCGTCGACTTTAGAAATCGTGAGGGTTCAAGTCCCTCTATCCCCCCCCCATCT
>JX03
ATTCTCTGACTAGCTGCTATTGAGCCCCATCTACAAATGGATAATTCTGTCTTAGTGGAGACGAGTTTTTGAAAATAACGGAGAAATACCGACTCTCTTGCAAGAGAGTCGGTATTTCTCCGTTATTTTTTATGTTTTTCTTTAGTAGTTTTTTATTTCTATCCTTTTTTTACGAAAAGTATTTTTATGCTTTTGCTTTGATTTTGTCTGATATTTTTGTTATGGTTATGGGCTCATATTCGTTATGTACCAGTATAATAATATTAGTTATTTGTTAATCCCACTAATAAAGTTCTAATTTTATTAATTCGATTCTAATTTTCGAATTTTTTAGTTTTTTTAATAGAAAATAAAAGAAAAGAGAAAGTTGTAATTTTATGCCTCTTAGATCTTCATTTCTATTTTAAATGGTAGAAATTGAAACCTTTTTATTAAATATTTTATTAAATAGAAATAAAAAAAATTTTAAATCGTGGAGGAAGGGGGGGCGGATGTAGCCAAGTGGATCAAGGCAGTGGATTGTGAATCCACCATGAGCGACGGGGATGCATGAGCTTGGTATGGAACCTACTAAGTGATAACTTTCAAATTCAGAGAAACCCTGGAATCAAAAATGGGCAATCCTGAGCCAAATCCTGTTTTACAAGAACAAACAAGGGTTCAGAAAGCGAAAAAAAAAGAAGGGGATAGGTGCAGAGACTCAACGGAAGCTGTTCTAAGAAATGGGGTTGACTGCCTTTTTTGGTAAAGAAAGGAAAAGAAATCCTATCGAAACTCCATAAAGGATGAAGGATAAGCGTATATACACTATGTATACACAATGAAAAACTATCTCAAAAATGACAACCGAATCCGTATTTTTTTTATGAAAAAGAAAAGAATTGTTATGAATCAATTCCAAGTTGAAGAAAGAATCGAATATTCATTGATCAAATCATTCACTCCATAGTCTGATCGATCTTTTCTTTTGAAGAACTGATTAATCGGACAAGAATAAAGATAGAGTCCCATTCTACATGTCAATATCAATACCGGCAACAATGAAATTTAGAGTAAGAGGAAAATCCGTCGACTTTAGAAATCGTGAGGGTTCAAGTCCCTCTATCCCCACCAA
>JX04
CCTCTGACTAGCTGCTATTGAGCCCCATCTACAAATGGATAATTCTGTCTTAGTGGAGACGAGTTTTTGAAAATAACGGAGAAATACCGACTCTCTTGCAAGAGAGTCGGTATTTCTCCGTTATTTTTTATGTTTTTCTTTAGTAGTTTTTTATTTCTATCCTTTTTTTACGAAAAGTATTTTTATGCTTTTGCTTTGATTTTGTCTGATATTTTTGTTATGGTTATGGGCTCATATTCGTTATGTACCAGTATAATAATATTAGTTATTTGTTAATCCCACTAATAAAGTTCTAATTTTATTAATTCGATTCTAATTTTCGAATTTTTTAGTTTTTTTAATAGAAAATAAAAGAAAAGAGAAAGTTGTAATTTTATGCCTCTTAGATCTTCATTTCTATTTTAAATGGTAGAAATTGAAACCTTTTTATTAAATATTTTATTAAATAGAAATAAAAAAAATTTTAAATCGTGGAGGAAGGGGGGGCGGATGTAGCCAAGTGGATCAAGGCAGTGGATTGTGAATCCACCATGAGCGACGATGGATGCATGAGCTTGGTATGGAACCTACTAAGTGATAACTTTCAAATTCAGAGAAACCCTGGAATCAAAAATGGGCAATCCTGAGCCAAATCCTGTTTTACAAGAACAAACAAGGGTTCAGAAAGCGAAAAAAAAAGAAGGGGATAGGTGCAGAGACTCAACGGAAGCTGTTCTAAGAAATGGGGTTGACTGCCTTTTTTGGTAAAGAAAGGAAAAGAAATCCTATCGAAACTCCATAAAGGATGAAGGATAAGCGTATATACACTATGTATACACAATGAAAAACTATCTCAAAAATGACAACCGAATCCGTATTTTTTTTATGAAAAAGAAAAGAATTGTTATGAATCAATTCCAAGTTGAAGAAAGAATCGAATATTCATTGATCAAATCATTCACTCCATAGTCTGATCGATCTTTTCTTTTGAAGAACTGATTAATCGGACAAGAATAAAGATAGAGTCCCATTCTACATGTCAATATCAATACCGGCAACAATGAAATTTAGAGTAAGAGGAAAATCCGTCGACTTTAGAAATCGTGAGGGTTCAAGTCCCTCTATCCCCAACAATG
>JX05
CCTCTGACTAGCTGCTATTGAGCCCCATCTACAAATGGATAATTCTGTCTTAGTGGAGACGAGTTTTTGAAAATAACGGAGAAATACCGACTCTCTTGCAAGAGAGTCGGTATTTCTCCGTTATTTTTTATGTTTTTCTTTAGTAGTTTTTTATTTCTATCCTTTTTTTACGAAAAGTATTTTTATGCTTTTGCTTTGATTTTGTCTGATATTTTTGTTATGGTTATGGGCTCATATTCGTTATGTACCAGTATAATAATATTAGTTATTTGTTAATCCCACTAATAAAGTTCTAATTTTATTAATTCGATTCTAATTTTCGAATTTTTTAGTTTTTTTAATAGAAAATAAAAGAAAAGAGAAAGTTGTAATTTTATGCCTCTTAGATCTTCATTTCTATTTTAAATGGTAGAAATTGAAACCTTTTTATTAAATATTTTATTAAATAGAAATAAAAAAAATTTTAAATCGTGGAGGAAGGGGGGGCGGATGTAGCCAAGTGGATCAAGGCAGTGGATTGTGAATCCACCATGAGCGAGAGGAATGGATGAGCTTGGTATGGAACCTACTAAGTGATAACTTTCAAATTCAGAGAAACCCTGGAATCAAAAATGGGCAATCCTGAGCCAAATCCTGTTTTACAAGAACAAACAAGGGTTCAGAAAGCGAAAAAAAAAGAAGGGGATAGGTGCAGAGACTCAACGGAAGCTGTTCTAAGAAATGGGGTTGACTGCCTTTTTTGGTAAAGAAAGGAAAAGAAATCCTATCGAAACTCCATAAAGGATGAAGGATAAGCGTATATACACTATGTATACACAATGAAAAACTATCTCAAAAATGACAACCGAATCCGTATTTTTTTTATGAAAAAGAAAAGAATTGTTATGAATCAATTCCAAGTTGAAGAAAGAATCGAATATTCATTGATCAAATCATTCACTCCATAGTCTGATCGATCTTTTCTTTTGAAGAACTGATTAATCGGACAAGAATAAAGATAGAGTCCCATTCTACATGTCAATATCAATACCGGCAACAATGAAATTTAGAGTAAGAGGAAAATCCGTCGACTTTAGAAATCGTGAGGGTTCAAGTCCCTCTATCCCCA
>JX06
TTTCTCTGACTAGCTGCTATTGAGCCCCATCTACAAATGGATAATTCTGTCTTAGTGGAGACGAGTTTTTGAAAATAACGGAGAAATACCGACTCTCTTGCAAGAGAGTCGGTATTTCTCCGTTATTTTTTATGTTTTTCTTTAGTAGTTTTTTATTTCTATCCTTTTTTTACGAAAAGTATTTTTATGCTTTTGCTTTGATTTTGTCTGATATTTTTGTTATGGTTATGGGCTCATATTCGTTATGTACCAGTATAATAATATTAGTTATTTGTTAATCCCACTAATAAAGTTCTAATTTTATTAATTCGATTCTAATTTTCGAATTTTTTAGTTTTTTTAATAGAAAATAAAAGAAAAGAGAAAGTTGTAATTTTATGCCTCTTAGATCTTCATTTCTATTTTAAATGGTAGAAATTGAAACCTTTTTATTAAATATTTTATTAAATAGAAATAAAAAAAATTTTAAATCGTGGAGGAAGGGGGGGCGGATGTAGCCAAGTGGATCAAGGCAGTGGATTGTGAATCCACCATGCGCGAGGAATGCATGAGCTTGGTATGGAACCTACTAAGTGATAACTTTCAAATTCAGAGAAACCCTGGAATCAAAAATGGGCAATCCTGAGCCAAATCCTGTTTTACAAGAACAAACAAGGGTTCAGAAAGCGAAAAAAAAAGAAGGGGATAGGTGCAGAGACTCAACGGAAGCTGTTCTAAGAAATGGGGTTGACTGCCTTTTTTGGTAAAGAAAGGAAAAGAAATCCTATCGAAACTCCATAAAGGATGAAGGATAAGCGTATATACACTATGTATACACAATGAAAAACTATCTCAAAAATGACAACCGAATCCGTATTTTTTTTATGAAAAAGAAAAGAATTGTTATGAATCAATTCCAAGTTGAAGAAAGAATCGAATATTCATTGATCAAATCATTCACTCCATAGTCTGATCGATCTTTTCTTTTGAAGAACTGATTAATCGGACAAGAATAAAGATAGAGTCCCATTCTACATGTCAATATCAATACCGGCAACAATGAAATTTAGAGTAAGAGGAAAATCCGTCGACTTTAGAAATCGTGAGGGTTCAAGTCCCTCTATCCCCA
>JX07
ACTCTGACTAGCTGCTATTGAGCCCCATCTACAAATGGATAATTCTGTCTTAGTGGAGACGAGTTTTTGAAAATAACGGAGAAATACCGACTCTCTTGCAAGAGAGTCGGTATTTCTCCGTTATTTTTTATGTTTTTCTTTAGTAGTTTTTTATTTCTATCCTTTTTTTACGAAAAGTATTTTTATGCTTTTGCTTTGATTTTGTCTGATATTTTTGTTATGGTTATGGGCTCATATTCGTTATGTACCAGTATAATAATATTAGTTATTTGTTAATCCCACTAATAAAGTTCTAATTTTATTAATTCGATTCTAATTTTCGAATTTTTTAGTTTTTTTAATAGAAAATAAAAGAAAAGAGAAAGTTGTAATTTTATGCCTCTTAGATCTTCATTTCTATTTTAAATGGTAGAAATTGAAACCTTTTTATTAAATATTTTATTAAATAGAAATAAAAAAAATTTTAAATCGTGGAGGAAGGGGGGGCGGATGTAGCCAAGTGGATCAAGGCAGTGGATTGTGAATCCACCATGCGCGAGCGATGCATGAGCTTGGTATGGAACCTACTAAGTGATAACTTTCAAATTCAGAGAAACCCTGGAATCAAAAATGGGCAATCCTGAGCCAAATCCTGTTTTACAAGAACAAACAAGGGTTCAGAAAGCGAAAAAAAAAGAAGGGGATAGGTGCAGAGACTCAACGGAAGCTGTTCTAAGAAATGGGGTTGACTGCCTTTTTTGGTAAAGAAAGGAAAAGAAATCCTATCGAAACTCCATAAAGGATGAAGGATAAGCGTATATACACTATGTATACACAATGAAAAACTATCTCAAAAATGACAACCGAATCCGTATTTTTTTTATGAAAAAGAAAAGAATTGTTATGAATCAATTCCAAGTTGAAGAAAGAATCGAATATTCATTGATCAAATCATTCACTCCATAGTCTGATCGATCTTTTCTTTTGAAGAACTGATTAATCGGACAAGAATAAAGATAGAGTCCCATTCTACATGTCAATATCAATACCGGCAACAATGAAATTTAGAGTAAGAGGAAAATCCGTCGACTTTAGAAATCGTGAGGGTTCAAGTCCCTCTATCCCCACCCAA
>JX08
ATCTCTGACTAGCTGCTATTGAGCCCCATCTACAAATGGATAATTCTGTCTTAGTGGAGACGAGTTTTTGAAAATAACGGAGAAATACCGACTCTCTTGCAAGAGAGTCGGTATTTCTCCGTTATTTTTTATGTTTTTCTTTAGTAGTTTTTTATTTCTATCCTTTTTTTACGAAAAGTATTTTTATGCTTTTGCTTTGATTTTGTCTGATATTTTTGTTATGGTTATGGGCTCATATTCGTTATGTACCAGTATAATAATATTAGTTATTTGTTAATCCCACTAATAAAGTTCTAATTTTATTAATTCGATTCTAATTTTCGAATTTTTTAGTTTTTTTAATAGAAAATAAAAGAAAAGAGAAAGTTGTAATTTTATGCCTCTTAGATCTTCATTTCTATTTTAAATGGTAGAAATTGAAACCTTTTTATTAAATATTTTATTAAATAGAAATAAAAAAAATTTTAAATCGTGGAGGAAGGGGGGGCGGATGTAGCCAAGTGGATCAAGGCAGTGGATTGTGAATCCACCATGCGCGACGGGGATGCATGAGCTTGGTATGGAACCTACTAAGTGATAACTTTCAAATTCAGAGAAACCCTGGAATCAAAAATGGGCAATCCTGAGCCAAATCCTGTTTTACAAGAACAAACAAGGGTTCAGAAAGCGAAAAAAAAAGAAGGGGATAGGTGCAGAGACTCAACGGAAGCTGTTCTAAGAAATGGGGTTGACTGCCTTTTTTGGTAAAGAAAGGAAAAGAAATCCTATCGAAACTCCATAAAGGATGAAGGATAAGCGTATATACACTATGTATACACAATGAAAAACTATCTCAAAAATGACAACCGAATCCGTATTTTTTTTATGAAAAAGAAAAGAATTGTTATGAATCAATTCCAAGTTGAAGAAAGAATCGAATATTCATTGATCAAATCATTCACTCCATAGTCTGATCGATCTTTTCTTTTGAAGAACTGATTAATCGGACAAGAATAAAGATAGAGTCCCATTCTACATGTCAATATCAATACCGGCAACAATGAAATTTAGAGTAAGAGGAAAATCCGTCGACTTTAGAAATCGTGAGGGTTCAAGTCCCTCTATCCCCACCCCATGT
>JX09
ATCTCTGACTAGCTGCTATTGAGCCCCATCTACAAATGGATAATTCTGTCTTAGTGGAGACGAGTTTTTGAAAATAACGGAGAAATACCGACTCTCTTGCAAGAGAGTCGGTATTTCTCCGTTATTTTTTATGTTTTTCTTTAGTAGTTTTTTATTTCTATCCTTTTTTTACGAAAAGTATTTTTATGCTTTTGCTTTGATTTTGTCTGATATTTTTGTTATGGTTATGGGCTCATATTCGTTATGTACCAGTATAATAATATTAGTTATTTGTTAATCCCACTAATAAAGTTCTAATTTTATTAATTCGATTCTAATTTTCGAATTTTTTAGTTTTTTTAATAGAAAATAAAAGAAAAGAGAAAGTTGTAATTTTATGCCTCTTAGATCTTCATTTCTATTTTAAATGGTAGAAATTGAAACCTTTTTATTAAATATTTTATTAAATAGAAATAAAAAAAATTTTAAATCGTGGAGGAAGGGGGGGCGGATGTAGCCAAGTGGATCAAGGCAGTGGATTGTGAATCCACCATGCGCGACGGGGAAGGCATGAGCTTGGTATGGAACCTACTAAGTGATAACTTTCAAATTCAGAGAAACCCTGGAATCAAAAATGGGCAATCCTGAGCCAAATCCTGTTTTACAAGAACAAACAAGGGTTCAGAAAGCGAAAAAAAAAGAAGGGGATAGGTGCAGAGACTCAACGGAAGCTGTTCTAAGAAATGGGGTTGACTGCCTTTTTTGGTAAAGAAAGGAAAAGAAATCCTATCGAAACTCCATAAAGGATGAAGGATAAGCGTATATACACTATGTATACACAATGAAAAACTATCTCAAAAATGACAACCGAATCCGTATTTTTTTTATGAAAAAGAAAAGAATTGTTATGAATCAATTCCAAGTTGAAGAAAGAATCGAATATTCATTGATCAAATCATTCACTCCATAGTCTGATCGATCTTTTCTTTTGAAGAACTGATTAATCGGACAAGAATAAAGATAGAGTCCCATTCTACATGTCAATATCAATACCGGCAACAATGAAATTTAGAGTAAGAGGAAAATCCGTCGACTTTAGAAATCGTGAGGGTTCAAGTCCCTCTATCCCCACCAAATT
>JX10
ATCCTCTGACTAGCTGCTATTGAGCCCCATCTACAAATGGATAATTCTGTCTTAGTGGAGACGAGTTTTTGAAAATAACGGAGAAATACCGACTCTCTTGCAAGAGAGTCGGTATTTCTCCGTTATTTTTTATGTTTTTCTTTAGTAGTTTTTTATTTCTATCCTTTTTTTACGAAAAGTATTTTTATGCTTTTGCTTTGATTTTGTCTGATATTTTTGTTATGGTTATGGGCTCATATTCGTTATGTACCAGTATAATAATATTAGTTATTTGTTAATCCCACTAATAAAGTTCTAATTTTATTAATTCGATTCTAATTTTCGAATTTTTTAGTTTTTTTAATAGAAAATAAAAGAAAAGAGAAAGTTGTAATTTTATGCCTCTTAGATCTTCATTTCTATTTTAAATGGTAGAAATTGAAACCTTTTTATTAAATATTTTATTAAATAGAAATAAAAAAAATTTTAAATCGTGGAGGAAGGGGGGGCGGATGTAGCCAAGTGGATCAAGGCAGTGGATTGTGAATCCACCATGCGCGACGCGAATGGCATGAGCTTGGTATGGAACCTACTAAGTGATAACTTTCAAATTCAGAGAAACCCTGGAATCAAAAATGGGCAATCCTGAGCCAAATCCTGTTTTACAAGAACAAACAAGGGTTCAGAAAGCGAAAAAAAAAGAAGGGGATAGGTGCAGAGACTCAACGGAAGCTGTTCTAAGAAATGGGGTTGACTGCCTTTTTTGGTAAAGAAAGGAAAAGAAATCCTATCGAAACTCCATAAAGGATGAAGGATAAGCGTATATACACTATGTATACACAATGAAAAACTATCTCAAAAATGACAACCGAATCCGTATTTTTTTTATGAAAAAGAAAAGAATTGTTATGAATCAATTCCAAGTTGAAGAAAGAATCGAATATTCATTGATCAAATCATTCACTCCATAGTCTGATCGATCTTTTCTTTTGAAGAACTGATTAATCGGACAAGAATAAAGATAGAGTCCCATTCTACATGTCAATATCAATACCGGCAACAATGAAATTTAGAGTAAGAGGAAAATCCGTCGACTTTAGAAATCGTGAGGGTTCAAGTCCCTCTATCCCCCCCAAA
>JX11
GCTCTGACTAGCTGCTATTGAAGCCCCATCTACAAATGGATAATTCTGTCTTAGTGGAGACGAGTTTTTGAAAATAACGGAGAAATACCGACTCTCTTGCAAGAGAGTCGGTATTTCTCCGTTATTTTTTATGTTTTTCTTTAGTAGTTTTTTATTTCTATCCTTTTTTTACGAAAAGTATTTTTATGCTTTTGCTTTGATTTTGTCTGATATTTTTGTTATGGTTATGGGCTCATATTCGTTATGTACCAGTATAATAATATTAGTTATTTGTTAATCCCACTAATAAAGTTCTAATTTTATTAATTCGATTCTAATTTTCGAATTTTTTAGTTTTTTTAATAGAAAATAAAAGAAAAGAGAAAGTTGTAATTTTATGCCTCTTAGATCTTCATTTCTATTTTAAATGGTAGAAATTGAAACCTTTTTATTAAATATTTTATTAAATAGAAATAAAAAAAATTTTAAATCGTGGAGGAAGGGGGGGCGGATGTAGCCAAGTGGATCAAGGCAGTGGATTGTGAATCCACCATGCGCGACGAGGGATGCATGAGCTTGGTATGGAACCTACTAAGTGATAACTTTCAAATTCAGAGAAACCCTGGAATCAAAAATGGGCAATCCTGAGCCAAATCCTGTTTTACAAGAACAAACAAGGGTTCAGAAAGCGAAAAAAAAAGAAGGGGATAGGTGCAGAGACTCAACGGAAGCTGTTCTAAGAAATGGGGTTGACTGCCTTTTTTGGTAAAGAAAGGAAAAGAAATCCTATCGAAACTCCATAAAGGATGAAGGATAAGCGTATATACACTATGTATACACAATGAAAAACTATCTCAAAAATGACAACCGAATCCGTATTTTTTTTATGAAAAAGAAAAGAATTGTTATGAATCAATTCCAAGTTGAAGAAAGAATCGAATATTCATTGATCAAATCATTCACTCCATAGTCTGATCGATCTTTTCTTTTGAAGAACTGATTAATCGGACAAGAATAAAGATAGAGTCCCATTCTACATGTCAATATCAATACCGGCAACAATGAAATTTAGAGTAAGAGGAAAATCCGTCGACTTTAGAAATCGTGAGGGTTCAAGTCCCTCTATCCCCACCCAA
>JX12
ATTCTCTGACTAGCTGCTATTGAGCCCCATCTACAAATGGATAATTCTGTCTTAGTGGAGACGTAGTTTTTGAAAATAACGGAGAAATACCGACTCTCTTGCAAGAGAGTCGGTATTTCTCCGTTATTTTTTATGTTTTTCTTTAGTAGTTTTTTATTTCTATCCTTTTTTTACGAAAAGTATTTTTATGCTTTTGCTTTGATTTTGTCTGATATTTTTGTTATGGTTATGGGCTCATATTCGTTATGTACCAGTATAATAATATTAGTTATTTGTTAATCCCACTAATAAAGTTCTAATTTTATTAATTCGATTCTAATTTTCGAATTTTTTAGTTTTTTTAATAGAAAATAAAAGAAAAGAGAAAGTTGTAATTTTATGCCTCTTAGATCTTCATTTCTATTTTAAATGGTAGAAATTGAAACCTTTTTATTAAATATTTTATTAAATAGAAATAAAAAAAATTTTAAATCGTGGAGGAAGGGGGGGCGGATGTAGCCAAGTGGATCAAGGCAGTGGATTGTGAATCCACCATGCGCGACGAGGAAATGGATGAGCTTGGTATGGACCTACTAAGTGATAACTTTCAAATTCAGAGAAACCCTGGAATCAAAAATGGGCAATCCTGAGCCAAATCCTGTTTTACAAGAACAAACAAGGGTTCAGAAAGCGAAAAAAAAAGAAGGGGATAGGTGCAGAGACTCAACGGAAGCTGTTCTAAGAAATGGGGTTGACTGCCTTTTTTGGTAAAGAAAGGAAAAGAAATCCTATCGAAACTCCATAAAGGATGAAGGATAAGCGTATATACACTATGTATACACAATGAAAAACTATCTCAAAAATGACAACCGAATCCGTATTTTTTTTATGAAAAAGAAAAGAATTGTTATGAATCAATTCCAAGTTGAAGAAAGAATCGAATATTCATTGATCAAATCATTCACTCCATAGTCTGATCGATCTTTTCTTTTGAAGAACTGATTAATCGGACAAGAATAAAGATAGAGTCCCATTCTACATGTCAATATCAATACCGGCAACAATGAAATTTAGAGTAAGAGGAAAATCCGTCGACTTTAGAAATCGTGAGGGTTCAAGTCCCTCTATCCCCACCCA
>JX13
AATTCTCTGACTAGCTGCTATTGAGCCCCATCTACAAATGGATAATTCTGTCTTAGTGGAGACGAAGTTTTTGAAAATAACGGAGAAATACCGACTCTCTTGCAAGAGAGTCGGTATTTCTCCGTTATTTTTTATGTTTTTCTTTAGTAGTTTTTTATTTCTATCCTTTTTTTACGAAAAGTATTTTTATGCTTTTGCTTTGATTTTGTCTGATATTTTTGTTATGGTTATGGGCTCATATTCGTTATGTACCAGTATAATAATATTAGTTATTTGTTAATCCCACTAATAAAGTTCTAATTTTATTAATTCGATTCTAATTTTCGAATTTTTTAGTTTTTTTAATAGAAAATAAAAGAAAAGAGAAAGTTGTAATTTTATGCCTCTTAGATCTTCATTTCTATTTTAAATGGTAGAAATTGAAACCTTTTTATTAAATATTTTATTAAATAGAAATAAAAAAAATTTTAAATCGTGGAGGAAGGGGGGGCGGATGTAGCCAAGTGGATCAAGGCAGTGGATTGTGAATCCACCATGCGCGACGAGGGATGGCTGAGCTTGGTATGGAACCTACTAAGTGATAACTTTCAAATTCAGAGAAACCCTGGAATCAAAAATGGGCAATCCTGAGCCAAATCCTGTTTTACAAGAACAAACAAGGGTTCAGAAAGCGAAAAAAAAAGAAGGGGATAGGTGCAGAGACTCAACGGAAGCTGTTCTAAGAAATGGGGTTGACTGCCTTTTTTGGTAAAGAAAGGAAAAGAAATCCTATCGAAACTCCATAAAGGATGAAGGATAAGCGTATATACACTATGTATACACAATGAAAAACTATCTCAAAAATGACAACCGAATCCGTATTTTTTTTATGAAAAAGAAAAGAATTGTTATGAATCAATTCCAAGTTGAAGAAAGAATCGAATATTCATTGATCAAATCATTCACTCCATAGTCTGATCGATCTTTTCTTTTGAAGAACTGATTAATCGGACAAGAATAAAGATAGAGTCCCATTCTACATGTCAATATCAATACCGGCAACAATGAAATTTAGAGTAAGAGGAAAATCCGTCGACTTTAGAAATCGTGAGGGTTCAAGTCCCTCTATCCCCCCCAATC
>JX14
CCTCAGACTAGCTGCTATTGAGCCCCATCTACAAATGGATAATTCTGTCTTAGTGGAGACGAGTTTTTGAAAATAACGGAGAAATACCGACTCTCTTGCAAGAGAGTCGGTATTTCTCCGTTATTTTTTATGTTTTTCTTTAGTAGTTTTTTATTTCTATCCTTTTTTTACGAAAAGTATTTTTATGCTTTTGCTTTGATTTTGTCTGATATTTTTGTTATGGTTATGGGCTCATATTCGTTATGTACCAGTATAATAATATTAGTTATTTGTTAATCCCACTAATAAAGTTCTAATTTTATTAATTCGATTCTAATTTTCGAATTTTTTAGTTTTTTTAATAGAAAATAAAAGAAAAGAGAAAGTTGTAATTTTATGCCTCTTAGATCTTCATTTCTATTTTAAATGGTAGAAATTGAAACCTTTTTATTAAATATTTTATTAAATAGAAATAAAAAAAATTTTAAATCGTGGAGGAAGGGGGGGCGGATGTAGCCAAGTGGATCAAGGCAGTGGATTGTGAATCCACCATGCGCGAGGCATGCATGAGCTTGGTATGGAACCTACTAAGTGATAACTTTCAAATTCAGAGAAACCCTGGAATCAAAAATGGGCAATCCTGAGCCAAATCCTGTTTTACAAGAACAAACAAGGGTTCAGAAAGCGAAAAAAAAAGAAGGGGATAGGTGCAGAGACTCAACGGAAGCTGTTCTAAGAAATGGGGTTGACTGCCTTTTTTGGTAAAGAAAGGAAAAGAAATCCTATCGAAACTCCATAAAGGATGAAGGATAAGCGTATATACACTATGTATACACAATGAAAAACTATCTCAAAAATGACAACCGAATCCGTATTTTTTTTATGAAAAAGAAAAGAATTGTTATGAATCAATTCCAAGTTGAAGAAAGAATCGAATATTCATTGATCAAATCATTCACTCCATAGTCTGATCGATCTTTTCTTTTGAAGAACTGATTAATCGGACAAGAATAAAGATAGAGTCCCATTCTACATGTCAATATCAATACCGGCAACAATGAAATTTAGAGTAAGAGGAAAATCCGTCGACTTTAGAAATCGTGAGGGTTCAAGTCCCTCTATCCCCACCCAT
>JX16
CTTCTCTGACTAGCTGCTATTGAGCCCCATCTACAAATGGATAATTCTGTCTTAGTGGAGACGAGTTTTTGAAAATAACGGAGAAATACCGACTCTCTTGCAAGAGAGTCGGTATTTCTCCGTTATTTTTAATGACTCGCCTCCACTAAGACAGATTTCTATCTTTTTTTTGGGGCAGCAATAGCAGGCTTTTCTAGAGGGAAGTGATGGACATTACGGTTATGGTTATGAGCTCATATTCGTTATGTACCAGTATAATAATATTAGTTATTTGTTAATCCCACTAATAAAGTTCTAATTTTATTAATTCGATTCTAATTTTCGAATTTTTTAGTTTTTTTAATATAAAATAAAAGAAAAGAGAAAGTTGTAATTTTATGCCTCTTAAATCTTCCTTTCTATTTTAAATGGTAGAAATTGAAACCCGTTTTTTTAATATTTTATTATATACTAATAAAAAAAATTTTATTTCGTGGAGGAAGGGGGGGGGGATGAGGTCTAGAGGATCATGGCGGGGGATTGTGAATCGCCCATCAGCGCCCGAACTCATGCCTGAGCTGGTATGGAACCTACTAAGTGATAACTTTCAAATTCAGAGAAACCCTGGAATCAAAAATGGGCAATCCTGAGCCAAATCCTGTTTTACAAGAACAAACAAGGGTTCAGAAAGCGAAAAAAAAAAAGGGGGATAGGTGCAGAGACTCAACGGAAGCTGTTCTAAGAAATGGGGTTGACTGCCTTTTTTGGTAAAGAAAGGAAAAGAAATCCTTCTATCGAATATCGAAACTCCATAAAGGATGAAGGATAAGCGTATATACACTATGTATACACAATGAAAAACTATCTCAAAAATGACAACCGAATCCGTATTTTTTTTTATGAAAAAGAAAAGAATTGTTATGAATCAATTCCAAGTTGAAGAAAGAATCGAATATTCATTGATCAAATCATTCACTCCATAGTCTGATCGATCTTTTCTTTTGAAGAACTGATTAATCGGACAAGAATAAAGATAGAGTCCCATTCTACATGTCAATATCAATACCGGCAACAATGAAATTTAGAGTAAGAGGAAAATCCGTCGACTTTAGAAATCGTGAGGGTTCAAGTCCCTCCTATCCCCA
>HS01
GAGTCTCTGACTAGCTGCTATTGAGCCCCATCTACAAATGGATAATTCTGTCTTAGTGGAGACGAGTTTTTGAAAATAACGGAGAAATACCGACTCTCTTGCAAGAGAGTCGGTATTTCTCCGTTATTTTTTATGTTTTTCCTTAGTAGTTTTTTATTTCTATCCTTTTTTTGGGGCAGTATTTTTAGGCTTTTGCTTGGGAAGTGTCTGATATTTTTGTTATGGTTATGGGCTCATATTCGTTATGTACCAGTATAATAATATTAGTTATTTGTTAATCCCACTAATAAAGTTCTAATTTTATTAATTCGATTCTAATTTTCGAATTTTTTAGTTTTTTTAATAGAAAATAAAAGAAAAGAGAAAGTTGTAATTTTATGCCTCTTAGATCTTCATTTCTATTTTAAATGGTAGAAATTGAAACCTTTTTATTAAATATTTTATTAAATAGAAATAAAAAAAATTTTAAATCGTGGAGGAAGGGGGGGCGGATGTAGCCAAGTGGATCAAGGCAGTGGATTGTGAATCCACCATGAGCGAGGAGCGCGTCATGGATGAGCTTGGTATGGAACCTACTAAGTGATAACTTTCAAATTCAGAGAAACCCTGGAATCAAAAATGGGCAATCCTGAGCCAAATCCTGTTTTACAAGAACAAACAAGGGTTCAGAAAGCGAAAAAAAAAGAAGGGGATAGGTGCAGAGACTCAACGGAAGCTGTTCTAAGAAATGGGGTTGACTGCCTTTTTTGGTAAAGAAAGGAAAAGAAATCCTATCGAAACTCCATAAAGGATGAAGGATAAGCGTATATACACTATGTATACACAATGAAAAACTATCTCAAAAATGACAACCGAATCCGTATTTTTTTTATGAAAAAGAAAAGAATTGTTATGAATCAATTCCAAGTTGAAGAAAGAATCGAATATTCATTGATCAAATCATTCACTCCATAGTCTGATCGATCTTTTCTTTTGAAGAACTGATTAATCGGACAAGAATAAAGATAGAGTCCCATTCTACATGTCAATATCAATACCGGCAACAATGAAATTTAGAGTAAGAGGAAAATCCGTCGACTTTAGAAATCGTGAGGGTTCAAGTCCCTCTATCCCC
>HS02
GAGTCTCTGACTAGCTGCTATTGTAGCCCCATCTACAAATGGATAATTCTGTCTTAGTGGAGACGAGTTTTTGAAAATAACGGAGAAATACCGACTCTCTTGCAAGAGAGTCGGTATTTCTCCGTTATTTTTTATGTTTTTCTTTAGTAGTTACAGAATTCTATCCTTTTTTTGGGGCTGTATTTTTAGCTAGGTCTAGAGGGAAGTTATGGATATTTTTGTTATGGTTAAGGGCTCATATTCGTTATGTACCAGTATAATAATATTAGTTATTTGTTAATCCCACTAATAAAGTTCTAATTTTATTAATTCGATTCTAATTTTCGAATTTTTTAGTTTTTTTAATAGAAAATAAAAGAAAAGAGAAAGTTGTAATTTTATGCCTCTTAAATCATCATTTCTATTTTAAATGGTAGAAATTGAAACCTTTTTATTAAATATTTTATTAAATAGAAATAAAAAAAATTTTAAATCTTGGAGGAAGGGGGGGCGGATGTAGCCAAGTGGATCAAGGCAGTGGATTGTGAATCCACCATGAGCGAGGACCCATGCATGAGCTTGGATGGAACCTACTAAGTGATAACTTTCAAATTCAGAGAAACCCTGGAATCAAAAATGGGCAATCCTGAGCCAAATCCTGTTTTACAAGAACAAACAAGGGTTCAGAAAGCGAAAAAAAAAGAAGGGGATAGGTGCAGAGACTCAACGGAAGCTGTTCTAAGAAATGGGGTTGACTGCCTTTTTTGGTAAAGAAAGGAAAAGAAATCCTATCGAAACTCCATAAAGGATGAAGGATAAGCGTATATACACTATGTATACACAATGAAAAACTATCTCAAAAATGACAACCGAATCCGTATTTTTTTTATGAAAAAGAAAAGAATTGTTATGAATCAATTCCAAGTTGAAGAAAGAATCGAATATTCATTGATCAAATCATTCACTCCATAGTCTGATCGATCTTTTCTTTTGAAGAACTGATTAATCGGACAAGAATAAAGATAGAGTCCCATTCTACATGTCAATATCAATACCGGCAACAATGAAATTTAGAGTAAGAGGAAAATCCGTCGACTTTAGAAATCGTGAGGGTTCAAGTCCTTTCTTTATCCCCA
>HS03
AATTCGCAGACTAGCTGCTATTGAGCCCCATCTACAAATGGATAATTCTGTCTTAGTGGAGACGAGTTTTTGAAAATAACGGAGAAATACCGACTCTCTTGCAAGAGAGTCGGTATTTCTCCGTTATTTTTGATGTTTTGCTTTAGTAGTTTTTTAGTTCTATCCTTTTTTTACGGGCAGTATTTTTATGCTTTTGCTTTGATTTTGTCTGATATTTTTGTTATGGTTATGGGCTCATATTCGGTATGTACCAGGGGGATGGTATGAGTTATTTGTTAATCCCACTAATAAAGTTCTAATTTTATTAATTCGATTCTAATTTTCGAATTTTTTAGTTTTTTTAATAGAAAATAAAAGAAAAGAGAAAGTTGTAATTTTATGCCTCTTAAATATTCATTTCTATTTTAAATGGTAGAAATTGAAACCTTTTTATTAAATATTTTAGTAAACAGAAATAAAAAAAATTTTAATTCTTGAAGGAGGGGGGGGCGGATGTAGCCGAGTGGATCGAGGCAGTGGATTGTGAATCCACCATACGCGACGAGTGCAATGGCATGAGCTTGGTATGGAACCTACTAAGTGATAACTTTCAAATTCAGAGAAACCCTGGAATCAAAAATGGGCAATCCTGAGCCAAATCCTGTTTTACAAGAACAAACAAGGGTTCAGAAAGCGAAAAAAAAAGAAGGGGATAGGTGCAGAGACTCAACGGAAGCTGTTCTAAGAAATGGGGTTGACTGCCTTTTTTGGTAAAGAAAGGAAAAGAAATCCTTCTATCGAATATCGAAACTCCATAAAGGATGAAGGATAAGCGTATATACACTATGTATACACAATGAAAAACTATCTCAAAAATGACAACCGAATCCGTATTTTTTTTATGAAAAAGAAAAGAATTGTTATGAATCAATTCCAAGTTGAAGAAAGAATCGAATATTCATTGATCAAATCATTCACTCCATAGTCTGATCGATCTTTTCTTTTGAAGAACTGATTAATCGGACAAGAATAAAGATAGAGTCCCATTCTACATGTCAATATCAATACCGGCAACAATGAAATTTAGAGTAAGAGGAAAATCCGTCGACTTTAGAAATCGTGAGGGTTCAAGTCCCTCTATCCCCC
>HS04
GCGTCCCGGACTAGCTGCTATTCTAGCCCCATCTACAAATGGATAATTCTGTCTTAGTGGAGACGAGTTTTTGAAAATAACGGAGAAATACCGACTCTCTTGCAAGAGAGTCGGTATTTCTCCGTTATTTTTTATGTTTTTCTTTAGTAGTTTTTTATTTCTATCCTTTTTTTGGGGCAGTATTTTTATGCTTTTGCTTTGGAAGTGTCGGATATTTTTGTTATGGTTATGGGCTCATATTCGTTATGTACCAGTATAATAATATTAGTTATTTGTTAATCCCACTAATAAAGTTCTAATTTTATTAATTCGATTCTAATTTTCGAATTTTTTAGTTTTTTTAATAGAAAATAAAAGAAAAGAGAAAGTTGTAATTTTATGCCTCTTAGATCTTCATTTCTATTTTAAATGGTAGAAATTGAAACCTTTTTATTAAATATTTTATTAAATAGAAATAAAAAAAATTTTAATTCGTGGAGGAAGGGGGGGCGGATGTAGCCAAGTGGATCAAGGCGGTGGATTGTGAATCCACCATACGCGACGAGCTCTAGGCAATGGCATGAGCTTGGTATGGAACCTACTAAGTGATAACTTTCAAATTCAGAGAAACCCTGGAATCAAAAATGGGCAATCCTGAGCCAAATCCTGTTTTACAAGAACAAACAAGGGTTCAGAAAGCGAAAAAAAAAGAAGGGGATAGGTGCAGAGACTCAACGGAAGCTGTTCTAAGAAATGGGGTTGACTGCCTTTTTTGGTAAAGAAAGGAAAAGAAATCCTTCTATCGAATATCGAAACTCCATAAAGGATGAAGGATAAGCGTATATACACTATGTATACACAATGAAAAACTATCTCAAAAATGACAACCGAATCCGTATTTTTTTTATGAAAAAGAAAAGAATTGTTATGAATCAATTCCAAGTTGAAGAAAGAATCGAATATTCATTGATCAAATCATTCACTCCATAGTCTGATCGATCTTTTCTTTTGAAGAACTGATTAATCGGACAAGAATAAAGATAGAGTCCCATTCTACATGTCAATATCAATACCGGCAACAATGAAATTTAGAGTAAGAGGAAAATCCGTCGACTTTAGAAATCGTGAGGGTTCAAGTCCCTCTATCCCCC
>HS05
ATTCTCTAGACTAGCTGCTATTGAGCCCCATCTACAAATGGATAATTCTGTCTTAGTGGAGACGAGTTTTTGAAAATAACGGAGAAATACCGACTCTCTTGCAAGAGAGTCGGTATTTCTCCGTTATTTTTTATAACTCGTCTCAGCTAAGACAGATTTCTATCATTTTTTTGGGGCTTCAATAGCAGCTAGGTCTAGAGGATTTTGACGGACATTTTTGTCATGCTTATGGGCTCATATTCGTTATGTACCAGTATAATAATATTAGTTATTTGTTAATCCCCCTAATAAAGTTCTACTTTTATTAATTCGATTCTAATTTTCGAATTTTTTAGTTTTTTTACTATAAAATAAAAAACAACAGAAAGTTGAGATTTTAAGCCTCTCAGAAATTCCGACTCTCTTGAATGAGAGAAAAATTTCTCCGTTTTTTTCAAAAACTCTTCTCCACAAAGACAAAATAATCTATTTGTTGATGGGGCTTCGGTAGCAGCTAGGCCCAGAGGGAAGTTATGGGCATTAGGTTAACCCTCACCAACGCGCGACCGTGAATGGATGAGCTTGGTATGGAACCTACTAAGTGATAACTTTCAAATTCAGAGAAACCCTGGAATCAAAAATGGGCAATCCTGAGCCAAATCCTGTTTTACAAGAACAAACAAGGGTTCAGAAAGCGAAAAAAAAAAAGGGGGATAGGTGCAGAGACTCAACGGAAGCTGTTCTAAGAAATGGGGTTGACTGCCTTTTTTGGTAAAGAAAGGAAAAGAAATCCTTCTATCGAATATCGAAACTCCATAAAGGATGAAGGATAAGCGTATATACACTATGTATACACAATGAAAAACTATCTCAAAAATGACAACCGAATCCGTATTTTTTTTTATGAAAAAGAAAAGAATTGTTATGAATCAATTCCAAGTTGAAGAAAGAATCGAATATTCATTGATCAAATCATTCACTCCATAGTCTGATCGATCTTTTCTTTTGAAAAACTGATTAATCGGACAAGAATAAAGATAGAGTCCCATTCTACATGTCAATATCAATACCGGCAACAATGAAATTTAGAGTAAGAGGAAAATCCGTCGACTTTAGAAATCGTGAGGGTTCAAGTCCCTCCTATCCCCAA
>HS06
CGTCTGACTAGCTGCTATTGAGCCCCATCTACAAATGGATAATTCTGTCTTAGTGGAGACGAGTTTTTGAAAATAACGGAGAAATACCGACTCTCTTGCAAGAGAGTCGGTATTTCACCGTTATTTTCTGCGACTCGCCTCCGCTCTCTGTTATTACTATCCGTTTTTTACGAACTTCATTGGCAGCAAGCGCTAGAGTATTTTGCTAGAAATTTATGTTATGCATAACAGCTCATATTCGATATGTACCATTATAATAATATTAGTTATTTGTTAATCCCGCTATTATGGTTCTAATTTTAGTATTTCGATTCTAATTTTCGAATTTTTTAGTTTTTTTGATATAAAATAAAAGAAAAGAAAAAGTTGTAATTTTATGCCTCTTAAATCTTCATTTCTATTTTGTATGATAGAAATTGAAACCCTCTTATTAAATATTTTATTAAATACAAATACAAAAAATTTTATTTCGTGGAGGAAGGGGGGGCGGATGTATCCAAGTGGATCAAGGCAGTGAATTGTGAGTCCACCATGAGCGCGCGATACGGATCTGCTTTCGTCTTACCGGAACGATGATAAAATCGGTGATAAATAAGATCAGTTGGGGGCATTTGTACATAATACCCACACGCGAGATCCATAGAAATGTAAATCATAAGCTAGTGTGAATGTCTTTGCAAATGATGTATTCCTTACTCTCTAGCCAAAGTGGTGGGATCGACGATGTTTTGATATCGGTCTAATTTTTATCTTACACTATGCCCCCACAGACTGCAGGTTGCGCTTACTACTTATAGTTATTTGGCAGCCCACTAACTGGATTGTCCTTCCCATGGATGAGCTGGTATGGAACCTACTAAGTGATAACTTTCAAATTCAGAGAAACCCTGGAATCAAAAATGGGCAATCCTGAGCCAAATCCTGTTTTACAAGAACAAACAAGGGTTCAGAAAGCGAAAAAAAAAGAAGGGGATAGGTGCAGAGACTCAACGGAAGCTGTTCTAAGAAATGGGGTTGACTGCCTTTTTTGGTAAAGAAAGGAAAAGAAATCCTATCGAAACTCCATAAAGGATGAAGGATAAGCGTATATACACTATGTATACACAATGAAAAACTATCTCAAAAATGACAACCGAATCCGTATTTTTTTTATGAAAAAGAAAAGAATTGTTATGAATCAATTCCAAGTTGAAGAAAGAATCGAATATTCATTGATCAAATCATTCACTCCATAGTCTGATCGATCTTTTCTTTTGAAGAACTGATTAATCGGACAAGAATAAAGATAGAGTCCCATTCTACATGTCAATATCAATACCGGCAACAATGAAATTTAGAGTAAGAGGAAAATCCGTCGACTTTAGAAATCGTGAGGGTTCAAGTCCCTCTTTTTCCCCCA
>WY02
CAGTCGCAGACTAGCTGCTATTGTAGCCCCATCTACAAATGGATAATTCTGTCTTAGTGGAGACGAGTTTTTGAAAATAACGGAGAAATACCGACTCTCTTGCAAGAGAGTCGGTATTTCTCCGTTATTTTTTATGTTTTTCTTTAGTAGTTTTTTATTTCTATCCTTTTTTTGGGGCAGTATTTTTATGCTTTTGCTTGGGAAGTGTCTGATATTTTTGTTATGGTTATGGGCTCATATTCGTTATGTACCAGTATAATAATATTAGTTATTTGTTAATCCCACTAATAAAGTTCTAATTTTATTAATTCGATTCTAATTTTCGAATTTTTTAGTTTTTTTAATAGAAAATAAAAGAAAAGAGAAAGTTGTAATTTTATGCCTCTTAAATCTTCATTTCTATTTTAAATGGTAGAAATTGAAACCTTTTTATTAAATATTTTATTAAATACAAATAAAAAAAATTTTAAATCGTGGAGGAAGGGGGGGCGGATGTAGCCAAGTGGATCAAGGCAGTGGATTGTGAATCCACCACACACGACGACTCCAAATGGGATGAGCTTGGTATGGAACCTACTAAGTGATAACTTTCAAATTCAGAGAAACCCTGGAATCAAAAATGGGCAATCCTGAGCCAAATCCTGTTTTACAAGAACAAACAAGGGTTCAGAAAGCGAAAAAAAAAGAAGGGGATAGGTGCAGAGACTCAACGGAAGCTGTTCTAAGAAATGGGGTTGACTGCCTTTTTTGGTAAAGAAAGGAAAAGAAATCCTATCGAAACTCCATAAAGGATGAAGGATAAGCGTATATACACTATGTATACACAATGAAAAACTATCTCAAAAATGACAACCGAATCCGTATTTTTTTTATGAAAAAGAAAAGAATTGTTATGAATCAATTCCAAGTTGAAGAAAGAATCGAATATTCATTGATCAAATCATTCACTCCATAGTCTGATCGATCTTTTCTTTTGAAGAACTGATTAATCGGACAAGAATAAAGATAGAGTCCCATTCTACATGTCAATATCAATACCGGCAACAATGAAATTTAGAGTAAGAGGAAAATCCGTCGACTTTAGAAATCGTGAGGGTTCAAGTCCCTCTATCCC
>WY03
GATCCCTGACTGCTGCTATTGAGCCCCATCTACAAATGGATAATTCTGTCTTAGTGGAGACGAGTTTTTGAAAATAACGGAGAAATACCGACTCTCTTGCAAGAGAGTCGGTATTTCTCCGTTATTTTTTATGTTTTTCTTTAGTAGTTTTTTATTTCTATCCTTTTTTTGGGGCAGTATTTTTATGCTTTTGCTTTGGAAGTGTCTGATATTTTTGTTATGGTTATGAGCTCATATTCGTTATGTACCAGTATAATAATATTAGTTATTTGTTAATCCCACTAATAAAGTTCTAATTTTATTAATTCGATTCTAATTTTCGAATTTTTTAGTTTTTTTAATAGAAAATAAAAGAAAAGAGAAAGTTGTAATTTTATGCCTCTTAGATCTTCATTTCTATTTTAAATGGTAGAAATTGAAACCTTTTTATTAAATATTTTATTAAATAGAAATAAAAAAAATTTTAAATCTTGGAGGAAGGGGGGGCGGATGTAGCCAAGTGGATCAAGGCAGTGGATTGTGAATCCACCATGACGCGATTGGGATGGCCTTGGTTGGAACCTACTAAGTGATAACTTTCAAATTCAGAGAAACCCTGGAATCAAAAATGGGCAATCCTGAGCCAAATCCTGTTTTACAAGAACAAACAAGGGTTCAGAAAGCGAAAAAAAAAGAAGGGGATAGGTGCAGAGACTCAACGGAAGCTGTTCTAAGAAATGGGGTTGACTGCCTTTTTTGGTAAAGAAAGGAAAAGAAATCCTATCGAAACTCCATAAAGGATGAAGGATAAGCGTATATACACTATGTATACACAATGAAAAACTATCTCAAAAATGACAACCGAATCCGTATTTTTTTTATGAAAAAGAAAAGAATTGTTATGAATCAATTCCAAGTTGAAGAAAGAATCGAATATTCATTGATCAAATCATTCACTCCATAGTCTGATCGATCTTTTCTTTTGAAGAACTGATTAATCGGACAAGAATAAAGATAGAGTCCCATTCTACATGTCAATATCAATACCGGCAACAATGAAATTTAGAGTAAGAGGAAAATCCGTCGACTTTAGAAATCGTGAGGGTTCAAGTCCCTCTATCCC
>WY04
TAGTCACTGACTGCTGCTATTGAGCCCCATCTACAAATGGATAATTCTGTCTTAGTGGAGACGAGTTTTTGAAAATAACGGAGAAATACCGACTCTCTTGCAAGAGAGTCGGTATTTCTCCGTTATTTTTTATGTTTTTCTTTAGTAGTTTTTTATTTCTATCCTTTTTTTGGGGCAGTATTTTTATGCTTTTGCTTTGGAAGTGTCTGATATTTTTGTTATGGTTATGAGCTCATATTCGTTATGTACCAGTATAATAATATTAGTTATTTGTTAATCCCACTAATAAAGTTCTAATTTTATTAATTCGATTCTAATTTTCGAATTTTTTAGTTTTTTTAATAGAAAATAAAAGAAAAGAGAAAGTTGTAATTTTATGCCTCTTAGATCTTCATTTCTATTTTAAATGGTAGAAATTGAAACCTTTTTATTAAATATTTTATTAAATAGAAATAAAAAAAATTTTAAATCGTGGAGGAAGGGGGGGCGGATGTAGCCAAGTGGATCAAGGCAGTGGATTGTGAATCCACCATACGCGACGACCCGTATGCATGACCTGGTTGGAACCTACTAAGTGATAACTTTCAAATTCAGAGAAACCCTGGAATCAAAAATGGGCAATCCTGAGCCAAATCCTGTTTTACAAGAACAAACAAGGGTTCAGAAAGCGAAAAAAAAAGAAGGGGATAGGTGCAGAGACTCAACGGAAGCTGTTCTAAGAAATGGGGTTGACTGCCTTTTTTGGTAAAGAAAGGAAAAGAAATCCTATCGAAACTCCATAAAGGATGAAGGATAAGCGTATATACACTATGTATACACAATGAAAAACTATCTCAAAAATGACAACCGAATCCGTATTTTTTTTATGAAAAAGAAAAGAATTGTTATGAATCAATTCCAAGTTGAAGAAAGAATCGAATATTCATTGATCAAATCATTCACTCCATAGTCTGATCGATCTTTTCTTTTGAAGAACTGATTAATCGGACAAGAATAAAGATAGAGTCCCATTCTACATGTCAATATCAATACCGGCAACAATGAAATTTAGAGTAAGAGGAAAATCCGTCGACTTTAGAAATCGTGAGGGTTCAAGTCCCTTCTATTCCCCCA
>WY05
[truncated: 109,850 more chars]
